# Supplementary material for: Systematic characterization of site-specific proline hydroxylation using hydrophilic interaction chromatography and mass spectrometry
Source: bioRxiv preprint, doi:10.1101/2023.07.28.550951, version 4 (2025-11-29)
Supplement: Supplemental Table 1 [file 550951_file03.xlsx]

## Sheet: HEK293
Proteins	Positions within proteins	Leading proteins	Protein	Protein names	Gene names	Sequence window	id	Amino acid	Charge	Protein group IDs	Diagnostic peak	Localization prob	PEP	Score	Delta score	Score for localization	Mass error [ppm]	Intensity	Position	Score diff	DMSO Localization prob	FG Localization prob	MG Localization prob	DMSO Score	FG Score	MG Score	Localization prob DMSO-B1T1	Score diff DMSO-B1T1	PEP DMSO-B1T1	Score DMSO-B1T1	Localization prob DMSO-B1T2	Score diff DMSO-B1T2	PEP DMSO-B1T2	Score DMSO-B1T2	Localization prob DMSO-B1T3	Score diff DMSO-B1T3	PEP DMSO-B1T3	Score DMSO-B1T3	Localization prob DMSO-B2	Score diff DMSO-B2	PEP DMSO-B2	Score DMSO-B2	Localization prob DMSO-B3	Score diff DMSO-B3	PEP DMSO-B3	Score DMSO-B3	Localization prob DMSO-B4	Score diff DMSO-B4	PEP DMSO-B4
P0DPI2;A0A0B4J2D5	85;85	P0DPI2	P0DPI2			LSRGGAEVQIFAPDVPQMHVIDHTKGQPSEG	0	P	4	1		0.999722	3.03652e-09	133.48	119.12	113.51	-0.55938	3196200000	85	35.5553	0.998513	0.99519	0.999722	91.615	133.48	113.51	0.998513	28.2697	0.00387736	58.015	0.99381	22.2589	9.88985e-05	91.615	0.993889	22.1125	0.00043918	72.167	0.975584	16.0158	5.73222e-06	91.128	0	0	NaN	NaN	NaN	NaN	NaN
P0DPI2;A0A0B4J2D5	97;97	P0DPI2	P0DPI2			PDVPQMHVIDHTKGQPSEGESRNVLTESARI	1	P	5	1		0.772795	0.000176582	44.023	36.937	44.023	1.1081	95144000	97	5.51049	NaN	0.772795	NaN	NaN	44.023	NaN	NaN	NaN	NaN	NaN	NaN	NaN	NaN	NaN	NaN	NaN	NaN	NaN	NaN	NaN	NaN	NaN	NaN	NaN	NaN	NaN	NaN	NaN	NaN
P0DPI2;A0A0B4J2D5	240;240	P0DPI2	P0DPI2			VVEAHVDQKNKVVTTPAFMCETALHYIHDGI	2	P	4	1		1	0.00293219	90.097	84.667	68.689	-0.53453	94402000	240	68.689	NaN	NaN	1	NaN	NaN	90.097	NaN	NaN	NaN	NaN	NaN	NaN	NaN	NaN	NaN	NaN	NaN	NaN	NaN	NaN	NaN	NaN	NaN	NaN	NaN	NaN	NaN	NaN	NaN
A0A2R8Y4L2;P09651	31;76	A0A2R8Y4L2;P09651	P09651	Heterogeneous nuclear ribonucleoprotein A1;Heterogeneous nuclear ribonucleoprotein A1, N-terminally processed	HNRNPA1	TYATVEEVDAAMNARPHKVDGRVVEPKRAVS	3	P	5	1539;7		1	5.13465e-08	127.28	121.83	58.284	-0.22424	14301000000	76	58.2844	1	1	1	116.21	99.86	127.28	1	50.426	3.86949e-05	87.352	1	40.6817	0.00709478	63.184	1	56.7199	6.46493e-08	116.21	1	72.9347	0.000193361	72.935	1	74.0624	0.000158475	74.062	1	58.2844	0.00120521
A0A2R8Y4L2	230	A0A2R8Y4L2	A0A2R8Y4L2			YNDFGNYNNQSSNFGPMKGGNFEGRSSGPHG	4	P	4	7		1	1.05111e-16	81.379	81.379	58.446	0.65774	3971700000	230	58.4455	1	1	1	73.617	81.379	75.78	NaN	NaN	NaN	NaN	NaN	NaN	NaN	NaN	1	42.4695	4.84888e-05	42.47	1	73.6167	1.53304e-14	73.617	NaN	NaN	NaN	NaN	1	50.4644	1.51092e-06
A0A2R8Y4L2;P09651	254;351	A0A2R8Y4L2;P09651	P09651	Heterogeneous nuclear ribonucleoprotein A1;Heterogeneous nuclear ribonucleoprotein A1, N-terminally processed	HNRNPA1	RSSGPHGGGGQYFAKPRNQGGYGGSSSSSSY;RSSGPYGGGGQYFAKPRNQGGYGGSSSSSSY	5	P	2	1539;7		1	0.000554662	96.993	79.625	76.85	-2.2195	0	351	76.8502	NaN	1	1	NaN	96.993	76.85	NaN	NaN	NaN	NaN	NaN	NaN	NaN	NaN	NaN	NaN	NaN	NaN	NaN	NaN	NaN	NaN	NaN	NaN	NaN	NaN	NaN	NaN	NaN
A0A3B3IU46	9	A0A3B3IU46	A0A3B3IU46			_______MTDTAEAVPNFEEMFASRFTENDK	6	P	2	12		1	0.000884601	75.695	68.948	75.695	-1.2283	19728000	9	75.6953	NaN	1	1	NaN	64.55	75.695	NaN	NaN	NaN	NaN	NaN	NaN	NaN	NaN	NaN	NaN	NaN	NaN	NaN	NaN	NaN	NaN	NaN	NaN	NaN	NaN	NaN	NaN	NaN
A0AVT1	30	A0AVT1	A0AVT1	Ubiquitin-like modifier-activating enzyme 6	UBA6	ASCSSWGTGSTNKNLPIMSTASVEIDDALYS	7	P	3	16		1	0.00217267	101.15	80.483	45.047	0.87737	101350000	30	45.0469	NaN	1	1	NaN	57.496	101.15	NaN	NaN	NaN	NaN	NaN	NaN	NaN	NaN	NaN	NaN	NaN	NaN	NaN	NaN	NaN	NaN	NaN	NaN	NaN	NaN	NaN	NaN	NaN
A0FGR8	714	A0FGR8	A0FGR8	Extended synaptotagmin-2	ESYT2	SNTAPSTPVIGGSDKPGMEEKAQPPEAGPQG	8	P	4	17		0.98749	6.13516e-07	81.697	81.697	67.396	-0.91673	164500000	714	22.4412	NaN	0.98749	0.98144	NaN	67.396	81.697	NaN	NaN	NaN	NaN	NaN	NaN	NaN	NaN	NaN	NaN	NaN	NaN	NaN	NaN	NaN	NaN	NaN	NaN	NaN	NaN	NaN	NaN	NaN
A1L0T0	215	A1L0T0	A1L0T0	Acetolactate synthase-like protein	ILVBL	TPGPVFVELPVDVLYPYFMVQKEMVPAKPPK	9	P	3	26		0.952909	0.00319635	43.554	43.554	43.554	1.4893	4004900	215	14.5261	0.952909	NaN	NaN	43.554	NaN	NaN	NaN	NaN	NaN	NaN	NaN	NaN	NaN	NaN	NaN	NaN	NaN	NaN	NaN	NaN	NaN	NaN	0.952909	14.5261	0.00319635	43.554	NaN	NaN	NaN
A1L0T0	142	A1L0T0	A1L0T0	Acetolactate synthase-like protein	ILVBL	TNTVTAVKNAQMAQSPILLLGGAASTLLQNR	10	P	3	26		1	0.00571943	52.061	47.647	52.061	0.55284	5869900	142	52.0611	1	NaN	NaN	52.061	NaN	NaN	NaN	NaN	NaN	NaN	NaN	NaN	NaN	NaN	NaN	NaN	NaN	NaN	NaN	NaN	NaN	NaN	1	52.0611	0.00571943	52.061	NaN	NaN	NaN
A2RTX5	40	A2RTX5	A2RTX5	Probable threonine--tRNA ligase 2, cytoplasmic	TARSL2	LWSEVERLRDEQLNAPYSCQAEGPCLTREVA	11	P	3	36		1	3.59101e-05	94.064	85.305	94.064	1.2398	428850000	40	73.6381	0.999999	0.999999	1	84.689	84.573	94.064	NaN	NaN	NaN	NaN	NaN	NaN	NaN	NaN	NaN	NaN	NaN	NaN	0.999999	61.6933	0.000337892	84.689	NaN	NaN	NaN	NaN	NaN	NaN	NaN
A3KMH1	1374	A3KMH1	A3KMH1	von Willebrand factor A domain-containing protein 8	VWA8	ILSDEKNYATIVVGFPDLMSPSEVYSWKRPS	12	P	3	43		0.969307	0.0010081	71.528	63.559	71.528	0.32498	23342000	1374	14.9942	0.969307	NaN	NaN	71.528	NaN	NaN	0.969307	14.9942	0.0010081	71.528	NaN	NaN	NaN	NaN	NaN	NaN	NaN	NaN	0.843604	7.31914	0.00139561	68.689	NaN	NaN	NaN	NaN	NaN	NaN	NaN
A3KMH1	470	A3KMH1	A3KMH1	von Willebrand factor A domain-containing protein 8	VWA8	VIAKNFADTLGYNIEPIMLYQDMTARDLLQQ	13	P	3	43		1	0.00024277	68.895	63.52	68.895	0.90005	21009000	470	68.8948	NaN	1	NaN	NaN	68.895	NaN	NaN	NaN	NaN	NaN	NaN	NaN	NaN	NaN	NaN	NaN	NaN	NaN	NaN	NaN	NaN	NaN	NaN	NaN	NaN	NaN	NaN	NaN	NaN
A3KN83	1059	A3KN83	A3KN83	Protein strawberry notch homolog 1	SBNO1	NALEIVMKSIVNLDSPMVSPPPDYPGEFFKD	14	P	3	44		0.999088	1.10518e-05	118.57	110.17	118.57	0.19287	84427000	1059	30.6156	NaN	NaN	0.999088	NaN	NaN	118.57	NaN	NaN	NaN	NaN	NaN	NaN	NaN	NaN	NaN	NaN	NaN	NaN	NaN	NaN	NaN	NaN	NaN	NaN	NaN	NaN	NaN	NaN	NaN
A3KN83	1063	A3KN83	A3KN83	Protein strawberry notch homolog 1	SBNO1	IVMKSIVNLDSPMVSPPPDYPGEFFKDVRQG	15	P	3	44		0.500884	0.0299278	45.369	37.836	45.369	1.666	4635200	1063	0.640321	NaN	NaN	0.500884	NaN	NaN	45.369	NaN	NaN	NaN	NaN	NaN	NaN	NaN	NaN	NaN	NaN	NaN	NaN	NaN	NaN	NaN	NaN	NaN	NaN	NaN	NaN	NaN	NaN	NaN
A5YKK6	1925	A5YKK6	A5YKK6	CCR4-NOT transcription complex subunit 1	CNOT1	SYRAQAEQQHNPAANPTMIRAKCYHNLDAFV	16	P	3	56		0.990863	0.00484823	63.145	61.284	53.278	-0.51343	62771000	1925	20.3523	0.990863	0.987956	NaN	53.278	63.145	NaN	NaN	NaN	NaN	NaN	NaN	NaN	NaN	NaN	NaN	NaN	NaN	NaN	NaN	NaN	NaN	NaN	NaN	NaN	NaN	NaN	0.990863	20.3523	0.0194658
A5YKK6	862	A5YKK6	A5YKK6	CCR4-NOT transcription complex subunit 1	CNOT1	EANSYFQRIYNHPPHPTMSVDEVLEMLQRFK	17	P	3	56		0.699669	0.000505719	69.259	48.634	69.259	1.2387	129710000	862	5.65265	0.699669	0.588375	0.657236	69.259	45.737	46.953	NaN	NaN	NaN	NaN	0.626331	5.25378	0.00429482	54.15	0.699669	5.65265	0.000505719	69.259	NaN	NaN	NaN	NaN	NaN	NaN	NaN	NaN	NaN	NaN	NaN
A5YKK6	1460	A5YKK6	A5YKK6	CCR4-NOT transcription complex subunit 1	CNOT1	MRNLTAGMAMITCREPLLMSISTNLKNSFAS	18	P	3	56		1	0.00673069	45.784	35.802	45.784	0.10804	19073000	1460	45.7844	1	NaN	NaN	45.784	NaN	NaN	NaN	NaN	NaN	NaN	1	45.7844	0.00673069	45.784	NaN	NaN	NaN	NaN	NaN	NaN	NaN	NaN	NaN	NaN	NaN	NaN	NaN	NaN	NaN
A5YKK6	2143	A5YKK6	A5YKK6	CCR4-NOT transcription complex subunit 1	CNOT1	LRNLILSAFPRNMRLPDPFTPNLKVDMLSEI	19	P	3	56		0.963448	0.0158106	68.689	62.256	68.689	-4.2052	26998000	2143	14.4296	NaN	NaN	0.963448	NaN	NaN	68.689	NaN	NaN	NaN	NaN	NaN	NaN	NaN	NaN	NaN	NaN	NaN	NaN	NaN	NaN	NaN	NaN	NaN	NaN	NaN	NaN	NaN	NaN	NaN
A5YKK6	1598	A5YKK6	A5YKK6	CCR4-NOT transcription complex subunit 1	CNOT1	LPTNDLSQPTGFLAQPMKQAWATDDVAQIYD	20	P	2	56		0.999998	3.87381e-15	154.69	141.28	131.06	0.037513	6310800000	1598	57.3418	0.999994	0.999998	0.999998	141.82	154.69	150.05	0.999954	44.5467	0.000427198	87.863	0.999991	50.3578	8.94659e-09	123.63	0.999994	52.1918	2.38056e-11	141.82	0.999891	39.7416	0.000458611	83.692	NaN	NaN	NaN	NaN	NaN	NaN	NaN
A5YKK6	1159	A5YKK6	A5YKK6	CCR4-NOT transcription complex subunit 1	CNOT1	NFHSLYSNFLDTLKNPEFNKMVLNETYRNIK	21	P	5	56		0.999564	3.90929e-07	74.144	69.522	74.144	-1.7447	74188000	1159	33.5987	NaN	0.999564	NaN	NaN	74.144	NaN	NaN	NaN	NaN	NaN	NaN	NaN	NaN	NaN	NaN	NaN	NaN	NaN	NaN	NaN	NaN	NaN	NaN	NaN	NaN	NaN	NaN	NaN	NaN
A6NDG6	47	A6NDG6	A6NDG6	Phosphoglycolate phosphatase	PGP	LFDCDGVLWRGETAVPGAPEALRALRARGKR	22	P	3	62		1	0.0303539	40.753	35.504	40.753	-3.8786	23501000	47	40.7526	NaN	1	NaN	NaN	40.753	NaN	NaN	NaN	NaN	NaN	NaN	NaN	NaN	NaN	NaN	NaN	NaN	NaN	NaN	NaN	NaN	NaN	NaN	NaN	NaN	NaN	NaN	NaN	NaN
A6NDG6	50	A6NDG6	A6NDG6	Phosphoglycolate phosphatase	PGP	CDGVLWRGETAVPGAPEALRALRARGKRLGF	23	P	3	62		1	0.0303539	40.753	35.504	40.753	-3.8786	23501000	50	40.7526	NaN	1	NaN	NaN	40.753	NaN	NaN	NaN	NaN	NaN	NaN	NaN	NaN	NaN	NaN	NaN	NaN	NaN	NaN	NaN	NaN	NaN	NaN	NaN	NaN	NaN	NaN	NaN	NaN
A6NDU8	117	A6NDU8	A6NDU8	UPF0600 protein C5orf51	C5orf51	FLSEPEILVKENNMHPKHCNLLGDELLECLS	24	P	5	63	+	0.99997	5.45201e-05	79.69	76.693	77.649	-0.68258	604020000	117	45.1577	0.999429	0.99997	NaN	56.298	79.69	NaN	NaN	NaN	NaN	NaN	NaN	NaN	NaN	NaN	0.999429	32.4336	0.00198517	56.298	NaN	NaN	NaN	NaN	NaN	NaN	NaN	NaN	NaN	NaN	NaN
A6NHQ2	195	A6NHQ2	A6NHQ2	rRNA/tRNA 2'-O-methyltransferase fibrillarin-like protein 1	FBLL1	AASGTTVSHVSDIIGPDGLVYAVEFSHRAGR	25	P	4	70		1	0.0270198	40.764	30.154	40.764	-2.7717	111210000	195	40.7645	1	NaN	NaN	40.764	NaN	NaN	NaN	NaN	NaN	NaN	NaN	NaN	NaN	NaN	1	40.7645	0.0270198	40.764	NaN	NaN	NaN	NaN	NaN	NaN	NaN	NaN	NaN	NaN	NaN
A6NHR9	979	A6NHR9	A6NHR9	Structural maintenance of chromosomes flexible hinge domain-containing protein 1	SMCHD1	PKLIVHCKFSGAPNLPVYVVDCSSSGTSILT	26	P	3	72		0.854404	0.00434856	41.483	36.218	41.483	2.546	2082100	979	7.68514	0.854404	NaN	NaN	41.483	NaN	NaN	NaN	NaN	NaN	NaN	NaN	NaN	NaN	NaN	NaN	NaN	NaN	NaN	NaN	NaN	NaN	NaN	0.854404	7.68514	0.00434856	41.483	NaN	NaN	NaN
A6NJ78	202	A6NJ78	A6NJ78	Probable methyltransferase-like protein 15	METTL15	RKDGPLDMRMDGGRYPDMPTAADVVNALDQQ	27	P	4	77		1	2.52502e-05	78.921	78.921	78.921	-2.7502	69448000	202	78.9206	NaN	NaN	1	NaN	NaN	78.921	NaN	NaN	NaN	NaN	NaN	NaN	NaN	NaN	NaN	NaN	NaN	NaN	NaN	NaN	NaN	NaN	NaN	NaN	NaN	NaN	NaN	NaN	NaN
A6NJ78	205	A6NJ78	A6NJ78	Probable methyltransferase-like protein 15	METTL15	GPLDMRMDGGRYPDMPTAADVVNALDQQALA	28	P	4	77		1	0.00156773	78.921	78.921	78.921	-2.7502	30963000	205	78.9206	NaN	NaN	1	NaN	NaN	78.921	NaN	NaN	NaN	NaN	NaN	NaN	NaN	NaN	NaN	NaN	NaN	NaN	NaN	NaN	NaN	NaN	NaN	NaN	NaN	NaN	NaN	NaN	NaN
A6NKT7;O14715;P49792;Q99666	1040;1039;2015;1039	A6NKT7;O14715;P49792;Q99666	P49792	RanBP2-like and GRIP domain-containing protein 3;RANBP2-like and GRIP domain-containing protein 8;E3 SUMO-protein ligase RanBP2;RANBP2-like and GRIP domain-containing protein 5/6	RGPD3;RGPD8;RANBP2;RGPD5	DDAYKTEDSDDIHFEPVVQMPEKVELVTGEE	29	P	3	2551;388;7253;82		0.915578	9.21491e-05	95.819	88.866	95.819	-0.26326	42249000	2015	10.3524	0.878918	0.915578	0.876523	40.545	95.819	58.137	NaN	NaN	NaN	NaN	NaN	NaN	NaN	NaN	NaN	NaN	NaN	NaN	0.878918	8.6087	0.00244344	40.545	NaN	NaN	NaN	NaN	NaN	NaN	NaN
A6NNZ2;Q3ZCM7	218;218	A6NNZ2;Q3ZCM7	Q3ZCM7	Tubulin beta-8 chain-like protein LOC260334;Tubulin beta-8 chain	TUBB8	DNEALYDICSKTLKLPTPTYGDLNHLVSATM;DNEALYDICSRTLKLPTPTYGDLNHLVSATM	31	P	4	4229;88		1	5.01298e-08	80.652	73.276	80.359	1.058	2882400000	218	80.3587	1	1	1	80.603	80.359	80.652	1	48.115	0.0023905	48.115	1	46.6604	0.00319817	46.66	1	69.979	0.00289665	80.603	NaN	NaN	NaN	NaN	NaN	NaN	NaN	NaN	NaN	NaN	NaN
A6NNZ2;Q3ZCM7	220;220	A6NNZ2;Q3ZCM7	Q3ZCM7	Tubulin beta-8 chain-like protein LOC260334;Tubulin beta-8 chain	TUBB8	EALYDICSKTLKLPTPTYGDLNHLVSATMSG;EALYDICSRTLKLPTPTYGDLNHLVSATMSG	32	P	4	4229;88		1	5.01298e-08	80.652	73.276	80.359	1.058	2882400000	220	80.3587	1	1	1	80.603	80.359	80.652	1	48.115	0.0023905	48.115	1	46.6604	0.00319817	46.66	1	69.979	0.00289665	80.603	NaN	NaN	NaN	NaN	NaN	NaN	NaN	NaN	NaN	NaN	NaN
A6NNZ2;P04350;P68371;Q13509;Q13885;Q3ZCM7;Q9BUF5;Q9BVA1	305;305;305;305;305;305;305;305	A6NNZ2;P04350;P68371;Q13509;Q13885;Q3ZCM7;Q9BUF5;Q9BVA1	P68371	Tubulin beta-8 chain-like protein LOC260334;Tubulin beta-4A chain;Tubulin beta-4B chain;Tubulin beta-3 chain;Tubulin beta-2A chain;Tubulin beta-8 chain;Tubulin beta-6 chain;Tubulin beta-2B chain	TUBB4A;TUBB4B;TUBB3;TUBB2A;TUBB8;TUBB6;TUBB2B	TQQMFDAKNMMAACDPRHGCYLTVAAIFRGR;TQQMFDAKNMMAACDPRHGRYLTAAAIFRGR;TQQMFDAKNMMAACDPRHGRYLTVAAVFRGR;TQQMFDAKNMMAACDPRHGRYLTVATVFRGR;TQQMFDARNMMAACDPRHGRYLTVATVFRGP;TQQMFDSKNMMAACDPRHGRYLTVAAIFRGR	33	P	2	1388;3076;3612;3678;4229;7499;7544;88		1	0.0349331	67.032	65.188	67.032	0.02122	0	305	67.032	1	NaN	NaN	67.032	NaN	NaN	NaN	NaN	NaN	NaN	NaN	NaN	NaN	NaN	NaN	NaN	NaN	NaN	NaN	NaN	NaN	NaN	1	67.032	0.0349331	67.032	NaN	NaN	NaN
A8CG34;A6NF01;Q96HA1	584;191;607	A8CG34;Q96HA1	A8CG34	Nuclear envelope pore membrane protein POM 121C;Putative nuclear envelope pore membrane protein POM 121B;Nuclear envelope pore membrane protein POM 121	POM121C;POM121B;POM121	PSTNPLLESLKKMQTPPSLPPCPESAGAATT	34	P	3	6870;94		0.486078	0.0204802	40.428	37.627	40.428	1.9586	0	584	0	NaN	0.486078	NaN	NaN	40.428	NaN	NaN	NaN	NaN	NaN	NaN	NaN	NaN	NaN	NaN	NaN	NaN	NaN	NaN	NaN	NaN	NaN	NaN	NaN	NaN	NaN	NaN	NaN	NaN
A8CG34;A6NF01;Q96HA1	585;192;608	A8CG34;Q96HA1	A8CG34	Nuclear envelope pore membrane protein POM 121C;Putative nuclear envelope pore membrane protein POM 121B;Nuclear envelope pore membrane protein POM 121	POM121C;POM121B;POM121	STNPLLESLKKMQTPPSLPPCPESAGAATTE	35	P	3	6870;94		0.486078	0.0204802	40.428	37.627	40.428	1.9586	0	585	0	NaN	0.486078	NaN	NaN	40.428	NaN	NaN	NaN	NaN	NaN	NaN	NaN	NaN	NaN	NaN	NaN	NaN	NaN	NaN	NaN	NaN	NaN	NaN	NaN	NaN	NaN	NaN	NaN	NaN
A8MXV4	51	A8MXV4	A8MXV4	Nucleoside diphosphate-linked moiety X motif 19, mitochondrial	NUDT19	PPPAEGFRLLLLQRSPHQGFMPGAHVFSGGV	36	P	4	107		0.858166	3.04684e-10	86.194	82.235	48.984	-1.2702	790820000	51	7.8179	0.858166	0.553813	0.854084	48.984	86.194	76.976	0.858166	7.8179	0.00524479	48.984	NaN	NaN	NaN	NaN	0.547233	0.822975	0.0159144	41.76	NaN	NaN	NaN	NaN	NaN	NaN	NaN	NaN	NaN	NaN	NaN
A8MXV4	57	A8MXV4	A8MXV4	Nucleoside diphosphate-linked moiety X motif 19, mitochondrial	NUDT19	FRLLLLQRSPHQGFMPGAHVFSGGVLDAADR	37	P	4	107		0.94474	0.00221291	53.266	42.123	53.266	0.037137	84665000	57	12.329	NaN	0.94474	0	NaN	53.266	NaN	NaN	NaN	NaN	NaN	NaN	NaN	NaN	NaN	NaN	NaN	NaN	NaN	NaN	NaN	NaN	NaN	NaN	NaN	NaN	NaN	NaN	NaN	NaN
B7Z6K7;E7ETH6;Q9H707	93;93;92	B7Z6K7;E7ETH6;Q9H707	Q9H707	Putative uncharacterized zinc finger protein 814;Zinc finger protein 587B;Zinc finger protein 552	ZNF814;ZNF587B;ZNF552	QVRTPMAGVSPKKAHPCEMCGPILGDILHVA;QVRTPVTGVSPKKAHPCEMCGPILGDILHVA	38	P	5	118;236;8047		0.977105	0.00147873	51.963	46.582	51.963	-0.86856	19841000	92	16.3021	NaN	0.977105	NaN	NaN	51.963	NaN	NaN	NaN	NaN	NaN	NaN	NaN	NaN	NaN	NaN	NaN	NaN	NaN	NaN	NaN	NaN	NaN	NaN	NaN	NaN	NaN	NaN	NaN	NaN
E9PAV3	1369	E9PAV3	E9PAV3	Nascent polypeptide-associated complex subunit alpha, muscle-specific form	NACA	PSSKGGPTTPSSKEGPTPPAATPSHKGGPAM	58	P	4	237		0.499308	0.00737293	41.76	26.99	41.76	-3.2075	0	1369	0	NaN	NaN	0.499308	NaN	NaN	41.76	NaN	NaN	NaN	NaN	NaN	NaN	NaN	NaN	NaN	NaN	NaN	NaN	NaN	NaN	NaN	NaN	NaN	NaN	NaN	NaN	NaN	NaN	NaN
E9PAV3	1371	E9PAV3	E9PAV3	Nascent polypeptide-associated complex subunit alpha, muscle-specific form	NACA	SKGGPTTPSSKEGPTPPAATPSHKGGPAMTP	59	P	4	237		0.499308	0.00737293	41.76	26.99	41.76	-3.2075	0	1371	0	NaN	NaN	0.499308	NaN	NaN	41.76	NaN	NaN	NaN	NaN	NaN	NaN	NaN	NaN	NaN	NaN	NaN	NaN	NaN	NaN	NaN	NaN	NaN	NaN	NaN	NaN	NaN	NaN	NaN
E9PAV3	1372	E9PAV3	E9PAV3	Nascent polypeptide-associated complex subunit alpha, muscle-specific form	NACA	KGGPTTPSSKEGPTPPAATPSHKGGPAMTPP	60	P	4	237		0.499308	0.00737293	41.76	26.99	41.76	-3.2075	0	1372	0	NaN	NaN	0.499308	NaN	NaN	41.76	NaN	NaN	NaN	NaN	NaN	NaN	NaN	NaN	NaN	NaN	NaN	NaN	NaN	NaN	NaN	NaN	NaN	NaN	NaN	NaN	NaN	NaN	NaN
E9PAV3	1376	E9PAV3	E9PAV3	Nascent polypeptide-associated complex subunit alpha, muscle-specific form	NACA	TTPSSKEGPTPPAATPSHKGGPAMTPPSPKR	61	P	4	237		0.499308	0.00737293	41.76	26.99	41.76	-3.2075	0	1376	0	NaN	NaN	0.499308	NaN	NaN	41.76	NaN	NaN	NaN	NaN	NaN	NaN	NaN	NaN	NaN	NaN	NaN	NaN	NaN	NaN	NaN	NaN	NaN	NaN	NaN	NaN	NaN	NaN	NaN
E9PAV3	1386	E9PAV3	E9PAV3	Nascent polypeptide-associated complex subunit alpha, muscle-specific form	NACA	PPAATPSHKGGPAMTPPSPKRGPAIPSPKGD	62	P	4	237		0.770172	0.00737293	41.76	26.99	41.76	-3.2075	47814000	1386	8.33511	NaN	NaN	0.770172	NaN	NaN	41.76	NaN	NaN	NaN	NaN	NaN	NaN	NaN	NaN	NaN	NaN	NaN	NaN	NaN	NaN	NaN	NaN	NaN	NaN	NaN	NaN	NaN	NaN	NaN
O00116	358	O00116	O00116	Alkyldihydroxyacetonephosphate synthase, peroxisomal	AGPS	GIIEKSCQGPRMSTGPDIHHFIMGSEGTLGV	63	P	4	245		1	8.6644e-05	93.397	86.821	78.202	0.68372	630380000	358	78.2024	1	1	1	78.202	93.397	83.701	NaN	NaN	NaN	NaN	NaN	NaN	NaN	NaN	NaN	NaN	NaN	NaN	NaN	NaN	NaN	NaN	1	78.2024	0.0165822	78.202	NaN	NaN	NaN
O00116	126	O00116	O00116	Alkyldihydroxyacetonephosphate synthase, peroxisomal	AGPS	IELTGKRYPLSGMGLPTFKEWIQNTLGVNVE	64	P	3	245		0.998696	0.000513738	62.677	56.897	62.677	-4.2549	0	126	28.8423	0.998696	NaN	NaN	62.677	NaN	NaN	NaN	NaN	NaN	NaN	0.998696	28.8423	0.000513738	62.677	NaN	NaN	NaN	NaN	NaN	NaN	NaN	NaN	NaN	NaN	NaN	NaN	NaN	NaN	NaN
O00139	259	O00139	O00139	Kinesin-like protein KIF2A	KIF2A	DVITIPSKDVVMVHEPKQKVDLTRYLENQTF	65	P	4	247		0.999145	0.00358878	61.102	50.962	61.102	0.289	2457100	259	30.6746	NaN	NaN	0.999145	NaN	NaN	61.102	NaN	NaN	NaN	NaN	NaN	NaN	NaN	NaN	NaN	NaN	NaN	NaN	NaN	NaN	NaN	NaN	NaN	NaN	NaN	NaN	NaN	NaN	NaN
O00139	532	O00139	O00139	Kinesin-like protein KIF2A	KIF2A	FIGENSRTCMIATISPGMASCENTLNTLRYA	66	P	3	247		1	0.00022047	101.48	98.845	101.48	-0.46407	0	532	101.477	NaN	1	NaN	NaN	101.48	NaN	NaN	NaN	NaN	NaN	NaN	NaN	NaN	NaN	NaN	NaN	NaN	NaN	NaN	NaN	NaN	NaN	NaN	NaN	NaN	NaN	NaN	NaN	NaN
O00148	245	O00148	O00148	ATP-dependent RNA helicase DDX39A	DDX39A	LSKDIRPVCRKFMQDPMEVFVDDETKLTLHG	67	P	4	248		1	7.99663e-20	148.87	145.11	51.966	2.8563	2126600000	245	51.9663	1	1	1	148.87	109.26	141.37	1	59.6613	0.00181607	59.661	1	148.869	7.99663e-20	148.87	1	74.2059	0.000196491	74.206	NaN	NaN	NaN	NaN	NaN	NaN	NaN	NaN	NaN	NaN	NaN
O00148	165	O00148	O00148	ATP-dependent RNA helicase DDX39A	DDX39A	GLSIKKDEEVLKKNCPHVVVGTPGRILALVR	68	P	3	248		1	0.00582348	77.597	62.395	74.698	0.63698	207870000	165	72.983	1	NaN	NaN	77.597	NaN	NaN	NaN	NaN	NaN	NaN	NaN	NaN	NaN	NaN	NaN	NaN	NaN	NaN	NaN	NaN	NaN	NaN	1	72.983	0.00705846	74.698	1	72.4431	0.00582348
O00151	11	O00151	O00151	PDZ and LIM domain protein 1	PDLIM1	_____MTTQQIDLQGPGPWGFRLVGGKDFEQ	69	P	2	249		1	2.42438e-05	147.24	130.89	56.225	-0.67356	172590000	11	56.2251	1	1	1	103.21	147.24	128.85	1	77.0624	0.00104991	77.062	NaN	NaN	NaN	NaN	1	103.213	9.92803e-05	103.21	NaN	NaN	NaN	NaN	1	85.2884	0.000546712	85.288	1	45.257	0.0639938
O00151	13	O00151	O00151	PDZ and LIM domain protein 1	PDLIM1	___MTTQQIDLQGPGPWGFRLVGGKDFEQPL	70	P	2	249		1	2.42438e-05	147.24	130.89	56.225	-0.67356	172590000	13	56.2251	1	1	1	103.21	147.24	128.85	1	77.0624	0.00104991	77.062	NaN	NaN	NaN	NaN	1	103.213	9.92803e-05	103.21	NaN	NaN	NaN	NaN	1	85.2884	0.000195955	98.407	1	45.257	0.0639938
O00151	258	O00151	O00151	PDZ and LIM domain protein 1	PDLIM1	PVTKVAASIGNAQKLPMCDKCGTGIVGVFVK	71	P	2	249		1	8.0409e-09	150.49	133.27	116.71	1.159	95942000	258	116.713	1	NaN	1	150.49	NaN	101.04	1	150.485	8.0409e-09	150.49	1	131.259	0.0245208	131.26	NaN	NaN	NaN	NaN	1	116.713	0.02969	116.71	NaN	NaN	NaN	NaN	NaN	NaN	NaN
O00178	482	O00178	O00178	GTP-binding protein 1	GTPBP1	KIKRSSIRKGMVMVSPRLNPQASWEFEAEIL	72	P	2	255		1	0.0249836	69.998	44.104	69.998	-2.8391	0	482	69.9985	NaN	1	NaN	NaN	69.998	NaN	NaN	NaN	NaN	NaN	NaN	NaN	NaN	NaN	NaN	NaN	NaN	NaN	NaN	NaN	NaN	NaN	NaN	NaN	NaN	NaN	NaN	NaN	NaN
O00178	581	O00178	O00178	GTP-binding protein 1	GTPBP1	AVGTITKLLQTTNNSPMNSKPQQIKMQSTKK	73	P	2	255		1	0.00024679	167.09	131.55	167.09	-0.43327	217590000	581	167.088	1	NaN	NaN	167.09	NaN	NaN	0.998888	29.5357	0.000284559	107.98	NaN	NaN	NaN	NaN	NaN	NaN	NaN	NaN	NaN	NaN	NaN	NaN	NaN	NaN	NaN	NaN	1	167.088	0.00024679
O00193	18	O00193	O00193	Small acidic protein	SMAP	AARESHPHGVKRSASPDDDLGSSNWEAADLG	74	P	2	259		1	0.0062451	53.828	47.797	53.828	-1.6031	43126000	18	53.8285	1	NaN	1	50.851	NaN	53.828	NaN	NaN	NaN	NaN	1	50.8512	0.0062451	50.851	0	0	NaN	NaN	NaN	NaN	NaN	NaN	NaN	NaN	NaN	NaN	NaN	NaN	NaN
O00203	640	O00203	O00203	AP-3 complex subunit beta-1	AP3B1	TLNIKATGYLELSNWPEVAPDPSVRNVEVIE	75	P	2	261		0.998905	0.015381	80.312	71.491	78.401	-2.9365	37387000	640	29.869	0.998905	NaN	NaN	80.312	NaN	NaN	0.998905	29.869	0.015381	78.401	0.952432	12.7927	0.0173703	80.312	0.940566	11.71	0.0179986	79.744	NaN	NaN	NaN	NaN	NaN	NaN	NaN	NaN	NaN	NaN	NaN
O00203	644	O00203	O00203	AP-3 complex subunit beta-1	AP3B1	KATGYLELSNWPEVAPDPSVRNVEVIELAKE	76	P	2	261		0.952432	0.0173703	80.312	71.491	80.312	0.55875	37387000	644	12.7927	0.952432	NaN	NaN	80.312	NaN	NaN	NaN	NaN	NaN	NaN	0.952432	12.7927	0.0173703	80.312	0.940566	11.71	0.0179986	79.744	NaN	NaN	NaN	NaN	NaN	NaN	NaN	NaN	NaN	NaN	NaN
O00203	149	O00203	O00203	AP-3 complex subunit beta-1	AP3B1	SALRVLSSIRVPIIVPIMMLAIKEASADLSP	77	P	2	261		1	0.0141468	80.239	80.239	80.239	-0.92829	48762000	149	63.6728	NaN	NaN	1	NaN	NaN	80.239	NaN	NaN	NaN	NaN	NaN	NaN	NaN	NaN	NaN	NaN	NaN	NaN	NaN	NaN	NaN	NaN	NaN	NaN	NaN	NaN	NaN	NaN	NaN
O00213	103	O00213	O00213	Amyloid beta A4 precursor protein-binding family B member 1	APBB1	NRNVTLTLAEEASQEPEMAPLGPKGLIHLYS	78	P	5	262		0.776088	0.00246983	42.828	40.738	42.828	1.6763	8800200	103	8.21135	NaN	NaN	0.776088	NaN	NaN	42.828	NaN	NaN	NaN	NaN	NaN	NaN	NaN	NaN	NaN	NaN	NaN	NaN	NaN	NaN	NaN	NaN	NaN	NaN	NaN	NaN	NaN	NaN	NaN
O00217	44	O00217	O00217	NADH dehydrogenase [ubiquinone] iron-sulfur protein 8, mitochondrial	NDUFS8	SSAVAATYKYVNMQDPEMDMKSVTDRAARTL	79	P	3	264		1	0.00102077	138.22	138.22	71.558	-0.39508	347750000	44	71.5582	NaN	1	1	NaN	138.22	73.499	NaN	NaN	NaN	NaN	NaN	NaN	NaN	NaN	NaN	NaN	NaN	NaN	NaN	NaN	NaN	NaN	NaN	NaN	NaN	NaN	NaN	NaN	NaN
O00233	55	O00233	O00233	26S proteasome non-ATPase regulatory subunit 9	PSMD9	NYDVLESQKGIGMNEPLVDCEGYPRSDVDLY	80	P	3	268		0.999847	0.000303368	90.468	85.181	90.468	-0.91316	51961000	55	38.1474	0.994002	0.999847	0.999255	49.618	90.468	60.472	0.994002	22.1938	0.0325152	49.618	NaN	NaN	NaN	NaN	NaN	NaN	NaN	NaN	NaN	NaN	NaN	NaN	NaN	NaN	NaN	NaN	NaN	NaN	NaN
O00264	87	O00264	O00264	Membrane-associated progesterone receptor component 1	PGRMC1	DFTPAELRRFDGVQDPRILMAINGKVFDVTK	81	P	4	273		1	4.14792e-06	101.71	94.754	56.766	-0.64618	61175000	87	56.7664	NaN	1	NaN	NaN	101.71	NaN	NaN	NaN	NaN	NaN	NaN	NaN	NaN	NaN	NaN	NaN	NaN	NaN	NaN	NaN	NaN	NaN	NaN	NaN	NaN	NaN	NaN	NaN	NaN
O00267	667	O00267	O00267	Transcription elongation factor SPT5	SUPT5H	RDVTNFTVGGFAPMSPRISSPMHPSAGGQRG	82	P	2	274		0.71739	0.00550135	132.59	120.53	132.59	-0.38381	353270000	667	4.04567	0.691508	NaN	0.71739	113.65	NaN	132.59	NaN	NaN	NaN	NaN	NaN	NaN	NaN	NaN	NaN	NaN	NaN	NaN	NaN	NaN	NaN	NaN	0.684098	3.35565	0.00590158	113.65	0.691508	3.50553	0.0891729
O00267	785	O00267	O00267	Transcription elongation factor SPT5	SUPT5H	MYGSQTPMYGSGSRTPMYGSQTPLQDGSRTP	83	P	3	274		0.99996	8.43644e-06	72.881	70.616	69.878	0.5201	284350000	785	44.0123	0.999792	0.990496	0.99996	62.69	72.881	69.878	0.999792	36.8238	0.0755361	62.69	0.859666	8.03956	0.00330266	43.068	NaN	NaN	NaN	NaN	NaN	NaN	NaN	NaN	0.998953	29.7943	0.0239653	55.66	NaN	NaN	NaN
O00267	776	O00267	O00267	Transcription elongation factor SPT5	SUPT5H	MTSTYGRTPMYGSQTPMYGSGSRTPMYGSQT	84	P	2	274		1	2.65956e-40	222.72	207.18	222.72	-0.19156	671950000	776	196.064	1	0.999993	1	171.99	177.81	222.72	NaN	NaN	NaN	NaN	1	100.175	0.000120593	145.83	1	158.666	6.17055e-07	171.99	1	122.678	0.00280981	145	NaN	NaN	NaN	NaN	NaN	NaN	NaN
O00299	224	O00299	O00299	Chloride intracellular channel protein 1	CLIC1	YLSNAYAREEFASTCPDDEEIELAYEQVAKA	85	P	3	279		1	0.035163	44.105	42.867	44.105	-0.073416	9883700	224	44.105	1	NaN	NaN	44.105	NaN	NaN	NaN	NaN	NaN	NaN	NaN	NaN	NaN	NaN	NaN	NaN	NaN	NaN	NaN	NaN	NaN	NaN	1	44.105	0.035163	44.105	NaN	NaN	NaN
O00330	66	O00330	O00330	Pyruvate dehydrogenase protein X component, mitochondrial	PDHX	WLRGDPIKILMPSLSPTMEEGNIVKWLKKEG	86	P	2	285		0.997596	0.00235673	87.667	87.667	87.667	-0.20172	59048000	66	26.187	NaN	0.997596	NaN	NaN	87.667	NaN	NaN	NaN	NaN	NaN	NaN	NaN	NaN	NaN	NaN	NaN	NaN	NaN	NaN	NaN	NaN	NaN	NaN	NaN	NaN	NaN	NaN	NaN	NaN
O00401	158	O00401	O00401	Neural Wiskott-Aldrich syndrome protein	WASL	RKSEKRRDPPNGPNLPMATVDIKNPEITTNR	87	P	4	289		0.985868	0.031442	44.382	35.591	44.382	-0.1873	5811000	158	19.1842	NaN	0.985868	NaN	NaN	44.382	NaN	NaN	NaN	NaN	NaN	NaN	NaN	NaN	NaN	NaN	NaN	NaN	NaN	NaN	NaN	NaN	NaN	NaN	NaN	NaN	NaN	NaN	NaN	NaN
O00410	159	O00410	O00410	Importin-5	IPO5	NVGLREAALHIFWNFPGIFGNQQQHYLDVIK	88	P	3	290		1	8.93003e-05	120.08	110.75	120.08	-3.9294	7831300	159	120.08	NaN	NaN	1	NaN	NaN	120.08	NaN	NaN	NaN	NaN	NaN	NaN	NaN	NaN	NaN	NaN	NaN	NaN	NaN	NaN	NaN	NaN	NaN	NaN	NaN	NaN	NaN	NaN	NaN
O00410	629	O00410	O00410	Importin-5	IPO5	ILGKEFQQYLPVVMGPLMKTASIKPEVALLD	89	P	2	290		0.99776	0.00258052	87.184	87.184	87.184	-1.0973	13320000	629	26.9292	NaN	0.99776	NaN	NaN	87.184	NaN	NaN	NaN	NaN	NaN	NaN	NaN	NaN	NaN	NaN	NaN	NaN	NaN	NaN	NaN	NaN	NaN	NaN	NaN	NaN	NaN	NaN	NaN	NaN
O00410	357	O00410	O00410	Importin-5	IPO5	ALDRMACGLGGKLVLPMIKEHIMQMLQNPDW	90	P	5	290		1	1.38022e-12	137.09	127.63	136.96	-0.53261	464800000	357	109.645	NaN	1	1	NaN	136.96	137.09	NaN	NaN	NaN	NaN	NaN	NaN	NaN	NaN	NaN	NaN	NaN	NaN	NaN	NaN	NaN	NaN	NaN	NaN	NaN	NaN	NaN	NaN	NaN
O00410	474	O00410	O00410	Importin-5	IPO5	QAHAAAALINFTEDCPKSLLIPYLDNLVKHL	91	P	3	290		1	0.00728662	60.542	56.701	55.589	0.77963	69668000	474	55.5888	1	NaN	NaN	60.542	NaN	NaN	NaN	NaN	NaN	NaN	NaN	NaN	NaN	NaN	NaN	NaN	NaN	NaN	NaN	NaN	NaN	NaN	1	60.5419	0.00728662	60.542	1	55.5888	0.0134608
O00410	909	O00410	O00410	Importin-5	IPO5	HCSPASFKYAEYFLRPMLQYVCDNSPEVRQA	92	P	3	290	+	1	3.67449e-11	136.58	130.07	136.58	-0.31431	324750000	909	79.082	NaN	NaN	1	NaN	NaN	136.58	NaN	NaN	NaN	NaN	NaN	NaN	NaN	NaN	NaN	NaN	NaN	NaN	NaN	NaN	NaN	NaN	NaN	NaN	NaN	NaN	NaN	NaN	NaN
O00411	654	O00411	O00411	DNA-directed RNA polymerase, mitochondrial	POLRMT	LTFEAVDVPMLCPPLPWTSPHSGAFLLSPTK	93	P	3	291		0.617702	7.87991e-05	48.088	43.279	48.088	-0.57905	6167700	654	1.04413	NaN	0.617702	NaN	NaN	48.088	NaN	NaN	NaN	NaN	NaN	NaN	NaN	NaN	NaN	NaN	NaN	NaN	NaN	NaN	NaN	NaN	NaN	NaN	NaN	NaN	NaN	NaN	NaN	NaN
O00411	658	O00411	O00411	DNA-directed RNA polymerase, mitochondrial	POLRMT	AVDVPMLCPPLPWTSPHSGAFLLSPTKLMRT	94	P	3	291		0.383981	7.87991e-05	48.088	43.279	48.088	-0.57905	0	658	0.960289	NaN	0.383981	NaN	NaN	48.088	NaN	NaN	NaN	NaN	NaN	NaN	NaN	NaN	NaN	NaN	NaN	NaN	NaN	NaN	NaN	NaN	NaN	NaN	NaN	NaN	NaN	NaN	NaN	NaN
O00411	808	O00411	O00411	DNA-directed RNA polymerase, mitochondrial	POLRMT	VFWLPHNMDFRGRTYPCPPHFNHLGSDVARA	95	P	4	291	+	0.887353	0.0127612	49.993	46.332	49.993	-0.016202	11099000	808	9.47872	0.887353	NaN	NaN	49.993	NaN	NaN	NaN	NaN	NaN	NaN	NaN	NaN	NaN	NaN	NaN	NaN	NaN	NaN	NaN	NaN	NaN	NaN	0.887353	9.47872	0.0127612	49.993	NaN	NaN	NaN
O00422	52	O00422	O00422	Histone deacetylase complex subunit SAP18	SAP18	NGRHHRMDEFSRGNVPSSELQIYTWMDATLK	96	P	2	293		1	0.000115693	75.463	64.995	75.463	-1.3105	57981000	52	75.4626	0.99998	NaN	1	52.92	NaN	75.463	NaN	NaN	NaN	NaN	0.99998	46.8989	0.000115693	52.92	NaN	NaN	NaN	NaN	NaN	NaN	NaN	NaN	NaN	NaN	NaN	NaN	NaN	NaN	NaN
O00425	155	O00425	O00425	Insulin-like growth factor 2 mRNA-binding protein 3	IGF2BP3	NGFQLENFTLKVAYIPDEMAAQQNPLQQPRG	97	P	3	295		1	1.1974e-05	110.86	102.95	107.13	0.47934	931520000	155	82.2792	1	0.999998	1	110.86	79.317	107.13	0.998951	30.07	0.0582544	44.998	NaN	NaN	NaN	NaN	NaN	NaN	NaN	NaN	NaN	NaN	NaN	NaN	1	63.5688	0.00022662	110.86	NaN	NaN	NaN
O00429	148	O00429	O00429	Dynamin-1-like protein	DNM1L	KIFSPNVVNLTLVDLPGMTKVPVGDQPKDIE	98	P	4	296		0.998693	1.11272e-05	122.53	109.12	104.98	0.70193	793610000	148	30.1336	0.817764	0.996462	0.998693	72.425	122.53	104.98	0.811905	7.27037	0.00188296	72.425	0.767152	5.44314	0.00232551	70.718	0.817764	7.61234	0.00201206	71.927	NaN	NaN	NaN	NaN	NaN	NaN	NaN	NaN	NaN	NaN	NaN
O00429	154	O00429	O00429	Dynamin-1-like protein	DNM1L	VVNLTLVDLPGMTKVPVGDQPKDIELQIREL	99	P	3	296		0.574574	1.23181e-07	124.45	111.96	81.839	0.36727	296480000	154	2.82115	NaN	0.516665	0.574574	NaN	124.45	81.839	NaN	NaN	NaN	NaN	NaN	NaN	NaN	NaN	NaN	NaN	NaN	NaN	NaN	NaN	NaN	NaN	NaN	NaN	NaN	NaN	NaN	NaN	NaN
O00443	549	O00443	O00443	Phosphatidylinositol 4-phosphate 3-kinase C2 domain-containing subunit alpha	PIK3C2A	LYQIEKPCKEAMTRHPVEELLDSYHNQVELA	100	P	5	298	+	1	0.00366026	42.121	37.014	42.121	0.52191	36175000	549	42.1214	NaN	NaN	1	NaN	NaN	42.121	NaN	NaN	NaN	NaN	NaN	NaN	NaN	NaN	NaN	NaN	NaN	NaN	NaN	NaN	NaN	NaN	NaN	NaN	NaN	NaN	NaN	NaN	NaN
O00458	404	O00458	O00458	Interferon-related developmental regulator 1	IFRD1	LQSNEFLRNVFELGPPVMLDAATLKTMKISR	101	P	2	299		0.736201	0.00915214	121.86	112.32	121.86	-0.70077	41667000	404	4.45723	NaN	NaN	0.736201	NaN	NaN	121.86	NaN	NaN	NaN	NaN	NaN	NaN	NaN	NaN	NaN	NaN	NaN	NaN	NaN	NaN	NaN	NaN	NaN	NaN	NaN	NaN	NaN	NaN	NaN
O00487	50	O00487	O00487	26S proteasome non-ATPase regulatory subunit 14	PSMD14	SLALLKMLKHGRAGVPMEVMGLMLGEFVDDY	102	P	2	312		1	0.00708857	65.172	54.228	65.172	-1.3949	60651000	50	65.1724	1	NaN	NaN	65.172	NaN	NaN	NaN	NaN	NaN	NaN	1	65.1724	0.00708857	65.172	NaN	NaN	NaN	NaN	NaN	NaN	NaN	NaN	NaN	NaN	NaN	NaN	NaN	NaN	NaN
O00566	531	O00566	O00566	U3 small nucleolar ribonucleoprotein protein MPP10	MPHOSPH10	IPKPPVPEIKVVSNLPAITMEEVAPVSVSDA	103	P	4	324		0.999964	7.42365e-05	97.509	91.849	97.509	1.193	1271700000	531	44.4351	0.99971	0.943659	0.999964	88.942	54.583	97.509	NaN	NaN	NaN	NaN	0.99971	35.3728	7.42365e-05	88.942	0.973077	15.5833	7.83724e-05	56.383	NaN	NaN	NaN	NaN	NaN	NaN	NaN	NaN	NaN	NaN	NaN
O00567	469	O00567	O00567	Nucleolar protein 56	NOP56	LAALALASSENSSSTPEECEEMSEKPKKKKK	104	P	3	325		1	7.26988e-05	94.72	94.72	43.696	-0.094518	1670300000	469	43.6963	1	0.896508	0.952477	94.72	88.222	66.282	NaN	NaN	NaN	NaN	NaN	NaN	NaN	NaN	0	0	NaN	NaN	0.968269	14.8451	0.000541341	94.72	1	43.6963	0.000699531	54.744	NaN	NaN	NaN
O00567	479	O00567	O00567	Nucleolar protein 56	NOP56	NSSSTPEECEEMSEKPKKKKKQKPQEVPQEN	105	P	3	325		0.999982	5.27549e-29	172.02	165.52	140.87	-0.31637	10077000000	479	47.4743	0.999896	0.999982	0.999486	161.16	172.02	143.19	0.998531	28.324	2.45748e-05	114.88	0.992871	21.4389	9.27982e-05	114.88	0.97657	16.1993	0.00202383	105.79	0.999896	39.8146	5.63495e-27	161.16	0	0	NaN	NaN	NaN	NaN	NaN
O00567	53	O00567	O00567	Nucleolar protein 56	NOP56	NLGKFHSIVRLVAFCPFASSQVALENANAVS	106	P	6	325		0.999906	0.00117451	42.524	36.463	42.524	1.0293	10572000	53	40.283	NaN	0.999906	NaN	NaN	42.524	NaN	NaN	NaN	NaN	NaN	NaN	NaN	NaN	NaN	NaN	NaN	NaN	NaN	NaN	NaN	NaN	NaN	NaN	NaN	NaN	NaN	NaN	NaN	NaN
O00571	568	O00571	O00571	ATP-dependent RNA helicase DDX3X	DDX3X	TKDLLDLLVEAKQEVPSWLENMAYEHHYKGS	107	P	6	326		1	9.7462e-06	84.58	75.962	51.089	-3.4559	456670000	568	51.0895	1	1	NaN	62.393	84.58	NaN	NaN	NaN	NaN	NaN	1	62.3934	9.7462e-06	62.393	NaN	NaN	NaN	NaN	NaN	NaN	NaN	NaN	NaN	NaN	NaN	NaN	NaN	NaN	NaN
O00592	541	O00592	O00592	Podocalyxin	PODXL	KVVSLNGELGDSWIVPLDNLTKDDLDEEEDT	108	P	3	328		1	0.0017988	64.152	55.265	64.152	-4.3953	0	541	64.152	NaN	NaN	1	NaN	NaN	64.152	NaN	NaN	NaN	NaN	NaN	NaN	NaN	NaN	NaN	NaN	NaN	NaN	NaN	NaN	NaN	NaN	NaN	NaN	NaN	NaN	NaN	NaN	NaN
O00762	142	O00762	O00762	Ubiquitin-conjugating enzyme E2 C	UBE2C	DVRTILLSIQSLLGEPNIDSPLNTHAAELWK	109	P	3	342		1	0.00961815	61.602	50.797	61.602	2.0157	32932000	142	61.6017	1	NaN	NaN	61.602	NaN	NaN	NaN	NaN	NaN	NaN	NaN	NaN	NaN	NaN	1	61.6017	0.00961815	61.602	NaN	NaN	NaN	NaN	NaN	NaN	NaN	NaN	NaN	NaN	NaN
O00762	147	O00762	O00762	Ubiquitin-conjugating enzyme E2 C	UBE2C	LLSIQSLLGEPNIDSPLNTHAAELWKNPTAF	110	P	3	342		1	0.000163363	65.301	60.984	61.602	2.0157	32932000	147	61.6017	1	NaN	0.844617	61.602	NaN	65.301	NaN	NaN	NaN	NaN	NaN	NaN	NaN	NaN	1	61.6017	0.00961815	61.602	NaN	NaN	NaN	NaN	NaN	NaN	NaN	NaN	NaN	NaN	NaN
O00764	284	O00764	O00764	Pyridoxal kinase	PDXK	RTIQCAKAQAGEGVRPSPMQLELRMVQSKRD	111	P	2	343		0.625494	0.00974888	85.845	60.408	85.845	1.8251	0	284	2.22765	0.625494	NaN	NaN	85.845	NaN	NaN	NaN	NaN	NaN	NaN	0.625494	2.22765	0.00974888	85.845	NaN	NaN	NaN	NaN	NaN	NaN	NaN	NaN	NaN	NaN	NaN	NaN	NaN	NaN	NaN
O14497	1632	O14497	O14497	AT-rich interactive domain-containing protein 1A	ARID1A	GPPVPASHIAPAPVQPPMIRRDITFPPGSVE	112	P	3	347		0.528479	0.00129119	65.25	57.538	65.25	-0.019818	176320000	1632	0.526844	0.528479	NaN	0.521056	65.25	NaN	58.997	0.528479	0.526844	0.00129119	65.25	NaN	NaN	NaN	NaN	NaN	NaN	NaN	NaN	NaN	NaN	NaN	NaN	NaN	NaN	NaN	NaN	NaN	NaN	NaN
O14497	1633	O14497	O14497	AT-rich interactive domain-containing protein 1A	ARID1A	PPVPASHIAPAPVQPPMIRRDITFPPGSVEA	113	P	3	347		0.71494	0.0226621	47.965	43.778	47.965	-0.28797	22763000	1633	4.20082	NaN	0.71494	NaN	NaN	47.965	NaN	NaN	NaN	NaN	NaN	NaN	NaN	NaN	NaN	NaN	NaN	NaN	NaN	NaN	NaN	NaN	NaN	NaN	NaN	NaN	NaN	NaN	NaN	NaN
O14497	757	O14497	O14497	AT-rich interactive domain-containing protein 1A	ARID1A	NQSSIAQDRGYMQRNPQMPQYSSPQPGSALS	114	P	3	347		0.959757	0.0144525	52.185	43.691	52.185	-0.96582	34310000	757	13.8082	NaN	0.959757	NaN	NaN	52.185	NaN	NaN	NaN	NaN	NaN	NaN	NaN	NaN	NaN	NaN	NaN	NaN	NaN	NaN	NaN	NaN	NaN	NaN	NaN	NaN	NaN	NaN	NaN	NaN
O14497	1213	O14497	O14497	AT-rich interactive domain-containing protein 1A	ARID1A	TFQKRNSMTPNPGYQPSMNTSDMMGRMSYEP	115	P	3	347		0.885719	0.00113897	49.125	49.125	49.125	-0.22779	39661000	1213	9.12538	NaN	NaN	0.885719	NaN	NaN	49.125	NaN	NaN	NaN	NaN	NaN	NaN	NaN	NaN	NaN	NaN	NaN	NaN	NaN	NaN	NaN	NaN	NaN	NaN	NaN	NaN	NaN	NaN	NaN
O14497	383	O14497	O14497	AT-rich interactive domain-containing protein 1A	ARID1A	GGGGQPLARTPQPSSPMDQMGKMRPQPYGGT	116	P	2	347		0.999681	0.000745143	134.75	134.75	134.75	-0.49904	59267000	383	34.966	NaN	NaN	0.999681	NaN	NaN	134.75	NaN	NaN	NaN	NaN	NaN	NaN	NaN	NaN	NaN	NaN	NaN	NaN	NaN	NaN	NaN	NaN	NaN	NaN	NaN	NaN	NaN	NaN	NaN
O14497	1771	O14497	O14497	AT-rich interactive domain-containing protein 1A	ARID1A	PAPMEGGEEEEELLGPKLEEEEEEEVVENDE	117	P	3	347		0.360241	6.02916e-11	65.315	63.554	65.315	2.0323	0	1771	0.263252	0.360241	NaN	NaN	65.315	NaN	NaN	NaN	NaN	NaN	NaN	NaN	NaN	NaN	NaN	0.360241	0.263252	6.02916e-11	65.315	NaN	NaN	NaN	NaN	NaN	NaN	NaN	NaN	NaN	NaN	NaN
O14519	25	O14519	O14519	Cyclin-dependent kinase 2-associated protein 1	CDK2AP1	HMPAAALNAAGSVHSPSTSMATSSQYRQLLS	118	P	4	349		1	2.36822e-17	146.12	141.06	146.12	-0.30597	938760000	25	102.434	1	1	1	102.55	116.94	146.12	NaN	NaN	NaN	NaN	1	82.2269	1.48779e-06	102.55	NaN	NaN	NaN	NaN	0.988831	19.5155	0.000158303	43.271	NaN	NaN	NaN	NaN	NaN	NaN	NaN
O14562	122	O14562	O14562	Ubiquitin domain-containing protein UBFD1	UBFD1	GSELKQKIHSITGLPPAMQKVMYKGLVPEDK	119	P	2	360		0.914872	0.0151194	140.16	90.746	140.16	-0.04069	653470000	122	10.3129	0.894007	0.914872	NaN	53.252	140.16	NaN	NaN	NaN	NaN	NaN	NaN	NaN	NaN	NaN	0.894007	9.26065	0.0549427	53.252	NaN	NaN	NaN	NaN	NaN	NaN	NaN	NaN	NaN	NaN	NaN
O14617	719	O14617	O14617	AP-3 complex subunit delta-1	AP3D1	VVQIDLSVPLKVPGLPMSDQYVKLEEERRHR	120	P	4	367		0.973323	0.0159983	48.547	40.925	48.547	-0.23881	11980000	719	15.6211	NaN	0.973323	NaN	NaN	48.547	NaN	NaN	NaN	NaN	NaN	NaN	NaN	NaN	NaN	NaN	NaN	NaN	NaN	NaN	NaN	NaN	NaN	NaN	NaN	NaN	NaN	NaN	NaN	NaN
O14639	708	O14639	O14639	Actin-binding LIM protein 1	ABLIM1	DGHMPAMRMDRGVSMPNMLEPKIFPYEMLMV	121	P	2	370		0.990194	0.00343241	106.18	106.18	106.18	-0.080641	51725000	708	20.0425	0.990194	NaN	0.980008	106.18	NaN	68.016	NaN	NaN	NaN	NaN	NaN	NaN	NaN	NaN	0.990194	20.0425	0.00343241	106.18	NaN	NaN	NaN	NaN	NaN	NaN	NaN	NaN	NaN	NaN	NaN
O14639	692	O14639	O14639	Actin-binding LIM protein 1	ABLIM1	SYGDVSGGVRDYQTLPDGHMPAMRMDRGVSM	122	P	6	370		0.839168	9.7004e-08	59.401	55.366	59.401	-0.3049	20878000	692	7.17485	NaN	NaN	0.839168	NaN	NaN	59.401	NaN	NaN	NaN	NaN	NaN	NaN	NaN	NaN	NaN	NaN	NaN	NaN	NaN	NaN	NaN	NaN	NaN	NaN	NaN	NaN	NaN	NaN	NaN
O14641	97	O14641	O14641	Segment polarity protein dishevelled homolog DVL-2	DVL2	NGRVVSWLVSSDNPQPEMAPPVHEPRAELAP	123	P	3	372		0.831958	3.20422e-08	109.05	105.32	93.006	-0.45993	299530000	97	7.0736	0.831958	0.823415	0.826374	93.006	109.05	109.05	0.668394	6.55478	0.000543243	69.72	0.831958	7.0736	2.93242e-06	93.006	NaN	NaN	NaN	NaN	NaN	NaN	NaN	NaN	NaN	NaN	NaN	NaN	NaN	NaN	NaN
O14678	6	O14678	O14678	ATP-binding cassette sub-family D member 4	ABCD4	__________MAVAGPAPGAGARPRLDLQFL	124	P	2	382		0.5	0.034023	53.775	12.548	46.129	0.13033	291090000	6	0	0.5	0	0.5	53.775	NaN	46.129	NaN	NaN	NaN	NaN	NaN	NaN	NaN	NaN	NaN	NaN	NaN	NaN	0.5	0	0.034023	53.775	NaN	NaN	NaN	NaN	NaN	NaN	NaN
O14678	8	O14678	O14678	ATP-binding cassette sub-family D member 4	ABCD4	________MAVAGPAPGAGARPRLDLQFLQR	125	P	2	382		0.993086	0.0317792	53.775	12.548	41.876	0.40391	303740000	8	21.5725	0.5	0.993086	0.5	53.775	41.876	46.129	NaN	NaN	NaN	NaN	NaN	NaN	NaN	NaN	NaN	NaN	NaN	NaN	0.5	0	0.034023	53.775	NaN	NaN	NaN	NaN	NaN	NaN	NaN
O14686	2472	O14686	O14686	Histone-lysine N-methyltransferase 2D	KMT2D	PQSRDPFAPLHKPPRPQPPEVAFKAGSLAHT	126	P	4	385		0.66667	0.00129927	45.003	32.594	45.003	-2.0992	122550000	2472	0	NaN	0.66667	NaN	NaN	45.003	NaN	NaN	NaN	NaN	NaN	NaN	NaN	NaN	NaN	NaN	NaN	NaN	NaN	NaN	NaN	NaN	NaN	NaN	NaN	NaN	NaN	NaN	NaN	NaN
O14686	2474	O14686	O14686	Histone-lysine N-methyltransferase 2D	KMT2D	SRDPFAPLHKPPRPQPPEVAFKAGSLAHTSL	127	P	4	385		0.66667	0.00129927	45.003	32.594	45.003	-2.0992	122550000	2474	0	NaN	0.66667	NaN	NaN	45.003	NaN	NaN	NaN	NaN	NaN	NaN	NaN	NaN	NaN	NaN	NaN	NaN	NaN	NaN	NaN	NaN	NaN	NaN	NaN	NaN	NaN	NaN	NaN	NaN
O14686	2475	O14686	O14686	Histone-lysine N-methyltransferase 2D	KMT2D	RDPFAPLHKPPRPQPPEVAFKAGSLAHTSLG	128	P	4	385		0.66667	0.00129927	45.003	32.594	45.003	-2.0992	122550000	2475	0	NaN	0.66667	NaN	NaN	45.003	NaN	NaN	NaN	NaN	NaN	NaN	NaN	NaN	NaN	NaN	NaN	NaN	NaN	NaN	NaN	NaN	NaN	NaN	NaN	NaN	NaN	NaN	NaN	NaN
O14686	2495	O14686	O14686	Histone-lysine N-methyltransferase 2D	KMT2D	KAGSLAHTSLGAGGFPAALPAGPAGELHAKV	129	P	4	385		0.878853	0.00129927	45.003	32.594	45.003	-2.0992	122550000	2495	5.59635	NaN	0.878853	NaN	NaN	45.003	NaN	NaN	NaN	NaN	NaN	NaN	NaN	NaN	NaN	NaN	NaN	NaN	NaN	NaN	NaN	NaN	NaN	NaN	NaN	NaN	NaN	NaN	NaN	NaN
O14686	2499	O14686	O14686	Histone-lysine N-methyltransferase 2D	KMT2D	LAHTSLGAGGFPAALPAGPAGELHAKVPSGQ	130	P	4	385		0.560569	0.00129927	45.003	32.594	45.003	-2.0992	122550000	2499	0	NaN	0.560569	NaN	NaN	45.003	NaN	NaN	NaN	NaN	NaN	NaN	NaN	NaN	NaN	NaN	NaN	NaN	NaN	NaN	NaN	NaN	NaN	NaN	NaN	NaN	NaN	NaN	NaN	NaN
O14686	2502	O14686	O14686	Histone-lysine N-methyltransferase 2D	KMT2D	TSLGAGGFPAALPAGPAGELHAKVPSGQPPN	131	P	4	385		0.560569	0.00129927	45.003	32.594	45.003	-2.0992	122550000	2502	0	NaN	0.560569	NaN	NaN	45.003	NaN	NaN	NaN	NaN	NaN	NaN	NaN	NaN	NaN	NaN	NaN	NaN	NaN	NaN	NaN	NaN	NaN	NaN	NaN	NaN	NaN	NaN	NaN	NaN
O14686	3156	O14686	O14686	Histone-lysine N-methyltransferase 2D	KMT2D	VEPAPAANSLGLGLKPGQSMMGSRDTRMGTG	132	P	3	385		0.999999	0.0019031	73.981	57.474	73.981	-0.69616	109820000	3156	60.574	NaN	0.999957	0.999999	NaN	63.376	73.981	NaN	NaN	NaN	NaN	NaN	NaN	NaN	NaN	NaN	NaN	NaN	NaN	NaN	NaN	NaN	NaN	NaN	NaN	NaN	NaN	NaN	NaN	NaN
O14686	3448	O14686	O14686	Histone-lysine N-methyltransferase 2D	KMT2D	KGIKKVMAQGSIGVAPGMNRQQVSLLAQRLS	133	P	2	385		1	0.00647377	69.261	55.827	69.261	0.009728	0	3448	69.2612	1	NaN	NaN	69.261	NaN	NaN	NaN	NaN	NaN	NaN	1	69.2612	0.00647377	69.261	NaN	NaN	NaN	NaN	NaN	NaN	NaN	NaN	NaN	NaN	NaN	NaN	NaN	NaN	NaN
O14744	213	O14744	O14744	Protein arginine N-methyltransferase 5;Protein arginine N-methyltransferase 5, N-terminally processed	PRMT5	YSKRIAVALEIGADLPSNHVIDRWLGEPIKA	134	P	3	397		1	1.04401e-18	149.85	141.23	89.946	1.5138	725370000	213	89.9464	1	1	1	149.85	122.3	107.74	NaN	NaN	NaN	NaN	1	103.022	0.000556287	103.02	1	66.3834	1.04401e-18	149.85	NaN	NaN	NaN	NaN	NaN	NaN	NaN	NaN	NaN	NaN	NaN
O14744	225	O14744	O14744	Protein arginine N-methyltransferase 5;Protein arginine N-methyltransferase 5, N-terminally processed	PRMT5	ADLPSNHVIDRWLGEPIKAAILPTSIFLTNK	135	P	3	397		1	1.04401e-18	149.85	141.23	89.946	1.5138	725370000	225	89.9464	1	1	1	149.85	122.3	107.74	NaN	NaN	NaN	NaN	1	103.022	0.000556287	103.02	1	66.3834	1.04401e-18	149.85	NaN	NaN	NaN	NaN	NaN	NaN	NaN	NaN	NaN	NaN	NaN
O14744	524	O14744	O14744	Protein arginine N-methyltransferase 5;Protein arginine N-methyltransferase 5, N-terminally processed	PRMT5	FHQLSAPQPCFTFSHPNRDPMIDNNRYCTLE	136	P	6	397		0.565744	3.52977e-05	84.365	72.848	84.365	0.032715	116550000	524	1.14881	0.565744	0.527497	NaN	84.365	43.801	NaN	0.565744	1.14881	3.52977e-05	84.365	0	0	NaN	NaN	NaN	NaN	NaN	NaN	0.473309	0.802576	0.00210003	47.099	NaN	NaN	NaN	NaN	NaN	NaN	NaN
O14745	10	O14745	O14745	Na(+)/H(+) exchange regulatory cofactor NHE-RF1	SLC9A3R1	______MSADAAAGAPLPRLCCLEKGPNGYG	137	P	2	398		0.951004	0.00154652	72.23	49.449	72.23	2.3466	46790000	10	12.8802	0.951004	NaN	NaN	72.23	NaN	NaN	NaN	NaN	NaN	NaN	NaN	NaN	NaN	NaN	NaN	NaN	NaN	NaN	NaN	NaN	NaN	NaN	0.951004	12.8802	0.00154652	72.23	NaN	NaN	NaN
O14787	169	O14787	O14787	Transportin-2	TNPO2	CEDSSELLDSDALNRPLNIMIPKFLQFFKHC	138	P	3	409		0.891809	6.72455e-05	90.534	80.817	90.534	0.87184	19636000	169	9.16081	NaN	0.891809	NaN	NaN	90.534	NaN	NaN	NaN	NaN	NaN	NaN	NaN	NaN	NaN	NaN	NaN	NaN	NaN	NaN	NaN	NaN	NaN	NaN	NaN	NaN	NaN	NaN	NaN	NaN
O14787;Q92973	795;796	O14787;Q92973	Q92973	Transportin-2;Transportin-1	TNPO2;TNPO1	ITIGRLGYVCPQEVAPMLQQFIRPWCTSLRN	139	P	3	409;6501		0.99972	0.000300796	73.389	67.959	73.389	-1.1973	678150000	796	35.5333	0.997303	0.99972	0.997855	50.827	73.389	66.853	NaN	NaN	NaN	NaN	NaN	NaN	NaN	NaN	0.997303	25.6773	0.00428798	50.827	0.994525	22.5687	0.0136395	42.106	NaN	NaN	NaN	NaN	NaN	NaN	NaN
O14787;Q92973	803;804	O14787;Q92973	Q92973	Transportin-2;Transportin-1	TNPO2;TNPO1	VCPQEVAPMLQQFIRPWCTSLRNIRDNEEKD	140	P	3	409;6501		0.999943	0.000300796	73.389	67.959	73.389	-1.1973	202900000	804	42.4642	0.999328	0.999943	0.997855	50.827	73.389	53.747	NaN	NaN	NaN	NaN	NaN	NaN	NaN	NaN	0.999328	31.7148	0.00428798	50.827	0.994525	22.5687	0.0136395	42.106	NaN	NaN	NaN	NaN	NaN	NaN	NaN
O14787	471	O14787	O14787	Transportin-2	TNPO2	CWTLSRYAHWVVSQPPDMHLKPLMTELLKRI	141	P	6	409		0.942627	0.00484053	44.052	44.052	44.052	-0.022431	53367000	471	12.0761	NaN	NaN	0.942627	NaN	NaN	44.052	NaN	NaN	NaN	NaN	NaN	NaN	NaN	NaN	NaN	NaN	NaN	NaN	NaN	NaN	NaN	NaN	NaN	NaN	NaN	NaN	NaN	NaN	NaN
O14787	477	O14787	O14787	Transportin-2	TNPO2	YAHWVVSQPPDMHLKPLMTELLKRILDGNKR	142	P	6	409		0.998841	4.71276e-05	76.733	70.438	76.733	-0.39623	92754000	477	30.1556	NaN	0.787445	0.998841	NaN	66.871	76.733	NaN	NaN	NaN	NaN	NaN	NaN	NaN	NaN	NaN	NaN	NaN	NaN	NaN	NaN	NaN	NaN	NaN	NaN	NaN	NaN	NaN	NaN	NaN
O14802	918	O14802	O14802	DNA-directed RNA polymerase III subunit RPC1	POLR3A	GGDGLDPAAMEGKDEPLEFKRVLDNIKAVFP	143	P	4	411		0.945644	0.00294838	47.537	38.991	47.537	-0.73346	55747000	918	12.4048	0.945644	0.845525	NaN	47.537	40.129	NaN	NaN	NaN	NaN	NaN	NaN	NaN	NaN	NaN	NaN	NaN	NaN	NaN	0.945644	12.4048	0.00294838	47.537	NaN	NaN	NaN	NaN	NaN	NaN	NaN
O14874	266	O14874	O14874	[3-methyl-2-oxobutanoate dehydrogenase [lipoamide]] kinase, mitochondrial	BCKDK	RVRINGHVAARFPFIPMPLDYILPELLKNAM	144	P	2	418		0.993902	9.10721e-05	146.07	125.87	146.07	-0.17022	77844000	266	22.1223	NaN	NaN	0.993902	NaN	NaN	146.07	NaN	NaN	NaN	NaN	NaN	NaN	NaN	NaN	NaN	NaN	NaN	NaN	NaN	NaN	NaN	NaN	NaN	NaN	NaN	NaN	NaN	NaN	NaN
O14880	41	O14880	O14880	Microsomal glutathione S-transferase 3	MGST3	AINVSKARKKYKVEYPIMYSTDPENGHIFNC	145	P	3	419		0.999274	3.91728e-05	99.999	93.35	84.975	0.18389	278120000	41	31.3901	0.979624	0.981258	0.999274	68.88	75.646	99.999	0.979624	16.8194	0.00418648	68.88	NaN	NaN	NaN	NaN	NaN	NaN	NaN	NaN	NaN	NaN	NaN	NaN	NaN	NaN	NaN	NaN	NaN	NaN	NaN
O14908	32	O14908	O14908	PDZ domain-containing protein GIPC1	GIPC1	NEEAEPGRGGLGVGEPGPLGGGGSGGPQMGL	146	P	4	423		0.312248	1.22221e-16	75.475	68.976	75.475	1.674	0	32	0	0.312248	NaN	NaN	75.475	NaN	NaN	NaN	NaN	NaN	NaN	0.312248	0	1.22221e-16	75.475	NaN	NaN	NaN	NaN	NaN	NaN	NaN	NaN	NaN	NaN	NaN	NaN	NaN	NaN	NaN
O14908	34	O14908	O14908	PDZ domain-containing protein GIPC1	GIPC1	EAEPGRGGLGVGEPGPLGGGGSGGPQMGLPP	147	P	4	423		0.312248	1.22221e-16	75.475	68.976	75.475	1.674	0	34	0	0.312248	NaN	NaN	75.475	NaN	NaN	NaN	NaN	NaN	NaN	0.312248	0	1.22221e-16	75.475	NaN	NaN	NaN	NaN	NaN	NaN	NaN	NaN	NaN	NaN	NaN	NaN	NaN	NaN	NaN
O14917	826	O14917	O14917	Protocadherin-17	PCDH17	SEVMYLKPASNNLTVPQGHAGCHTSFTGQGT	148	P	5	425		0.522784	0.000159048	42.461	35.485	42.461	1.6535	29528000	826	0.396658	0.522784	NaN	NaN	42.461	NaN	NaN	NaN	NaN	NaN	NaN	0.522784	0.396658	0.000159048	42.461	NaN	NaN	NaN	NaN	NaN	NaN	NaN	NaN	NaN	NaN	NaN	NaN	NaN	NaN	NaN
O14920	684	O14920	O14920	Inhibitor of nuclear factor kappa-B kinase subunit beta	IKBKB	VSGSPDSMNASRLSQPGQLMSQPSTASNSLP	149	P	3	426		0.9879	0.0260921	45.011	36.652	45.011	0.27395	38228000	684	19.1885	NaN	NaN	0.9879	NaN	NaN	45.011	NaN	NaN	NaN	NaN	NaN	NaN	NaN	NaN	NaN	NaN	NaN	NaN	NaN	NaN	NaN	NaN	NaN	NaN	NaN	NaN	NaN	NaN	NaN
O14964	294	O14964	O14964	Hepatocyte growth factor-regulated tyrosine kinase substrate	HGS	RLRQKSTYTSYPKAEPMPSASSAPPASSLYS	150	P	3	435		0.826139	4.67275e-09	63.97	59.015	63.97	-1.3557	16012000	294	7.42336	0.826139	NaN	NaN	63.97	NaN	NaN	NaN	NaN	NaN	NaN	NaN	NaN	NaN	NaN	NaN	NaN	NaN	NaN	0.826139	7.42336	4.67275e-09	63.97	NaN	NaN	NaN	NaN	NaN	NaN	NaN
O14975	604	O14975	O14975	Very long-chain acyl-CoA synthetase	SLC27A2	KDALYFLDDTAKMYVPMTEDIYNAISAKTLK	151	P	2	441		1	0.0005645	149.38	120.42	101.39	-0.038155	166660000	604	101.39	1	1	NaN	101.39	149.38	NaN	NaN	NaN	NaN	NaN	NaN	NaN	NaN	NaN	1	101.39	0.0005645	101.39	NaN	NaN	NaN	NaN	NaN	NaN	NaN	NaN	NaN	NaN	NaN
O14979	265	O14979	O14979	Heterogeneous nuclear ribonucleoprotein D-like	HNRNPDL	KEYFGAFGEIENIELPMDTKTNERRGFCFIT	152	P	3	444		1	6.8067e-31	207.97	189.15	57.616	-0.10318	3801000000	265	57.6158	1	1	1	198.74	136.39	207.97	NaN	NaN	NaN	NaN	0.99997	45.2397	8.99668e-10	64.127	0.999988	49.2353	1.86253e-07	59.401	NaN	NaN	NaN	NaN	1	185.324	6.13717e-22	185.32	1	66.7791	1.16665e-29
O14980	427	O14980	O14980	Exportin-1	XPO1	MLFKVRLLMVSRMAKPEEVLVVENDQGEVVR	153	P	4	445		1	1.29367e-08	116.24	104.05	109.08	0.38098	1336500000	427	109.076	1	1	1	116.24	70.994	103.17	NaN	NaN	NaN	NaN	1	116.242	1.29367e-08	116.24	1	55.2471	0.00380863	55.247	NaN	NaN	NaN	NaN	NaN	NaN	NaN	NaN	1	109.076	2.79743e-08
O14980	1066	O14980	O14980	Exportin-1	XPO1	KRQMSVPGIFNPHEIPEEMCD__________	154	P	3	445		0.999489	0.000888536	67.274	67.274	46.702	-0.21528	832470000	1066	32.8304	0.999381	NaN	0.999489	56.54	NaN	67.274	NaN	NaN	NaN	NaN	NaN	NaN	NaN	NaN	NaN	NaN	NaN	NaN	NaN	NaN	NaN	NaN	0.999381	32.4348	0.00434481	56.54	0.997944	26.8722	0.000888536
O14980	769	O14980	O14980	Exportin-1	XPO1	ETLKLISGWVSRSNDPQMVAENFVPPLLDAV	155	P	2	445		1	4.5051e-56	211.13	187.14	211.13	-0.81669	10053000000	769	155.01	1	1	1	193.9	202.5	211.13	1	129.212	1.30895e-37	185.33	1	94.269	8.04818e-18	148.56	0.999707	36.1845	8.89988e-05	83.202	1	139.529	2.96445e-38	193.9	1	77.7492	8.54003e-07	120.85	NaN	NaN	NaN
O14981	1047	O14981	O14981	TATA-binding protein-associated factor 172	BTAF1	TTIVKHFGGEMAVKLPHLWDAMVGPLRNTID	156	P	4	446		1	2.75137e-06	93.322	81.356	93.322	0.78691	21980000	1047	72.6965	NaN	1	NaN	NaN	93.322	NaN	NaN	NaN	NaN	NaN	NaN	NaN	NaN	NaN	NaN	NaN	NaN	NaN	NaN	NaN	NaN	NaN	NaN	NaN	NaN	NaN	NaN	NaN	NaN
O15013	586	O15013	O15013	Rho guanine nucleotide exchange factor 10	ARHGEF10	ILLLQDMLKNTSKGHPDRLPLQMALTELETL	157	P	4	447		0.606629	4.94264e-06	112.41	104.64	110.94	-0.15435	436200000	586	1.8812	0.606322	0.606629	0.555639	104.1	110.94	112.41	NaN	NaN	NaN	NaN	0.606322	1.87561	3.19594e-05	104.1	NaN	NaN	NaN	NaN	NaN	NaN	NaN	NaN	NaN	NaN	NaN	NaN	NaN	NaN	NaN
O15013	590	O15013	O15013	Rho guanine nucleotide exchange factor 10	ARHGEF10	QDMLKNTSKGHPDRLPLQMALTELETLAEKL	158	P	4	447		0.5	0.0298157	43.162	37.502	43.162	-1.1281	23344000	590	0	NaN	0	0.5	NaN	NaN	43.162	NaN	NaN	NaN	NaN	NaN	NaN	NaN	NaN	NaN	NaN	NaN	NaN	NaN	NaN	NaN	NaN	NaN	NaN	NaN	NaN	NaN	NaN	NaN
O15013	450	O15013	O15013	Rho guanine nucleotide exchange factor 10	ARHGEF10	NYVDALKRILEQYEKPLSEMEPKVLSERKLK	159	P	2	447		0.977796	0.00052821	103.35	70.402	103.35	-2.3264	127460000	450	16.4381	NaN	0.977796	0.937515	NaN	103.35	80.706	NaN	NaN	NaN	NaN	NaN	NaN	NaN	NaN	NaN	NaN	NaN	NaN	NaN	NaN	NaN	NaN	NaN	NaN	NaN	NaN	NaN	NaN	NaN
O15014	377	O15014	O15014	Zinc finger protein 609	ZNF609	DLEMRNGRGRGKRMRPNSNTPVNETATASDS	160	P	4	448		1	8.02446e-49	186.82	180.79	127.14	-2.2236	90333000	377	67.0368	1	0.999948	0.998261	186.82	99.954	68.587	1	64.366	1.29752e-08	125.78	1	63.1716	0	186.82	0.946616	12.4877	0.0194102	65.753	1	67.0368	1.11997e-08	127.14	NaN	NaN	NaN	NaN	NaN	NaN	NaN
O15014	706	O15014	O15014	Zinc finger protein 609	ZNF609	VAQAMPNSPQLKPIQPKPTVMGEPFTVNPAL	161	P	3	448		0.497445	0.00225933	72.876	70.153	72.876	-0.51909	0	706	0	0.497445	NaN	NaN	72.876	NaN	NaN	NaN	NaN	NaN	NaN	NaN	NaN	NaN	NaN	NaN	NaN	NaN	NaN	NaN	NaN	NaN	NaN	0.497445	0	0.00225933	72.876	NaN	NaN	NaN
O15014	708	O15014	O15014	Zinc finger protein 609	ZNF609	QAMPNSPQLKPIQPKPTVMGEPFTVNPALTP	162	P	3	448		0.497445	0.00225933	72.876	70.153	72.876	-0.51909	0	708	0	0.497445	NaN	NaN	72.876	NaN	NaN	NaN	NaN	NaN	NaN	NaN	NaN	NaN	NaN	NaN	NaN	NaN	NaN	NaN	NaN	NaN	NaN	0.497445	0	0.00225933	72.876	NaN	NaN	NaN
O15027	134	O15027	O15027	Protein transport protein Sec16A	SEC16A	AHASPFSGALTPSAPPGPEMNRSAEVGPSSE	163	P	3	452		0.565869	0.0003364	73.294	65.301	73.294	0.13233	248740000	134	2.84196	NaN	0.540567	0.565869	NaN	54.658	73.294	NaN	NaN	NaN	NaN	NaN	NaN	NaN	NaN	NaN	NaN	NaN	NaN	NaN	NaN	NaN	NaN	NaN	NaN	NaN	NaN	NaN	NaN	NaN
O15027	2178	O15027	O15027	Protein transport protein Sec16A	SEC16A	TVQAAPPALPGPPGAPVNMYSRRAAGTRARY	164	P	3	452		0.97909	0.00509624	55.734	46.792	55.734	-0.28269	67981000	2178	17.8782	NaN	NaN	0.97909	NaN	NaN	55.734	NaN	NaN	NaN	NaN	NaN	NaN	NaN	NaN	NaN	NaN	NaN	NaN	NaN	NaN	NaN	NaN	NaN	NaN	NaN	NaN	NaN	NaN	NaN
O15042	357	O15042	O15042	U2 snRNP-associated SURP motif-containing protein	U2SURP	MIMSFEMKLGWGKAVPIPPHPIYIPPSMMEH	165	P	5	457		0.159955	0.00188255	42.709	38.221	42.709	1.1464	0	357	0	0.159955	0	NaN	42.709	NaN	NaN	0.159955	0	0.00188255	42.709	NaN	NaN	NaN	NaN	NaN	NaN	NaN	NaN	NaN	NaN	NaN	NaN	NaN	NaN	NaN	NaN	NaN	NaN	NaN
O15042	359	O15042	O15042	U2 snRNP-associated SURP motif-containing protein	U2SURP	MSFEMKLGWGKAVPIPPHPIYIPPSMMEHTL	166	P	5	457		0.159955	0.00188255	42.709	38.221	42.709	1.1464	0	359	0	0.159955	0	NaN	42.709	NaN	NaN	0.159955	0	0.00188255	42.709	NaN	NaN	NaN	NaN	NaN	NaN	NaN	NaN	NaN	NaN	NaN	NaN	NaN	NaN	NaN	NaN	NaN	NaN	NaN
O15042	360	O15042	O15042	U2 snRNP-associated SURP motif-containing protein	U2SURP	SFEMKLGWGKAVPIPPHPIYIPPSMMEHTLP	167	P	5	457		0.159955	0.00188255	42.709	38.221	42.709	1.1464	0	360	0	0.159955	0	NaN	42.709	NaN	NaN	0.159955	0	0.00188255	42.709	NaN	NaN	NaN	NaN	NaN	NaN	NaN	NaN	NaN	NaN	NaN	NaN	NaN	NaN	NaN	NaN	NaN	NaN	NaN
O15042	362	O15042	O15042	U2 snRNP-associated SURP motif-containing protein	U2SURP	EMKLGWGKAVPIPPHPIYIPPSMMEHTLPPP	168	P	5	457		0.159955	0.00188255	42.709	38.221	42.709	1.1464	0	362	0	0.159955	0	NaN	42.709	NaN	NaN	0.159955	0	0.00188255	42.709	NaN	NaN	NaN	NaN	NaN	NaN	NaN	NaN	NaN	NaN	NaN	NaN	NaN	NaN	NaN	NaN	NaN	NaN	NaN
O15042	366	O15042	O15042	U2 snRNP-associated SURP motif-containing protein	U2SURP	GWGKAVPIPPHPIYIPPSMMEHTLPPPPSGL	169	P	4	457		0.436793	1.52445e-05	85.19	80.863	85.19	-0.34969	0	366	0	0.159955	0.436793	NaN	42.709	85.19	NaN	0.159955	0	0.00188255	42.709	NaN	NaN	NaN	NaN	NaN	NaN	NaN	NaN	NaN	NaN	NaN	NaN	NaN	NaN	NaN	NaN	NaN	NaN	NaN
O15042	367	O15042	O15042	U2 snRNP-associated SURP motif-containing protein	U2SURP	WGKAVPIPPHPIYIPPSMMEHTLPPPPSGLP	170	P	4	457		0.436793	1.52445e-05	85.19	80.863	85.19	-0.34969	0	367	0	0.159955	0.436793	NaN	42.709	85.19	NaN	0.159955	0	0.00188255	42.709	NaN	NaN	NaN	NaN	NaN	NaN	NaN	NaN	NaN	NaN	NaN	NaN	NaN	NaN	NaN	NaN	NaN	NaN	NaN
O15042	457	O15042	O15042	U2 snRNP-associated SURP motif-containing protein	U2SURP	GPMFEAMIMNREINNPMFRFLFENQTPAHVY	171	P	4	457		0.999996	2.48746e-09	118.37	102.6	118.37	0.52954	175980000	457	53.6893	NaN	NaN	0.999996	NaN	NaN	118.37	NaN	NaN	NaN	NaN	NaN	NaN	NaN	NaN	NaN	NaN	NaN	NaN	NaN	NaN	NaN	NaN	NaN	NaN	NaN	NaN	NaN	NaN	NaN
O15042	505	O15042	O15042	U2 snRNP-associated SURP motif-containing protein	U2SURP	RTEDFRMFKNGSFWRPPPLNPYLHGMSEEQE	172	P	5	457		0.634692	5.0904e-05	55.366	50.605	55.366	-3.0024	112540000	505	6.97876	NaN	0.634692	NaN	NaN	55.366	NaN	NaN	NaN	NaN	NaN	NaN	NaN	NaN	NaN	NaN	NaN	NaN	NaN	NaN	NaN	NaN	NaN	NaN	NaN	NaN	NaN	NaN	NaN	NaN
O15042	510	O15042	O15042	U2 snRNP-associated SURP motif-containing protein	U2SURP	RMFKNGSFWRPPPLNPYLHGMSEEQETEAFV	173	P	4	457		0.932717	3.15362e-05	92.49	87.681	92.49	-1.146	69091000	510	12.5788	0.857328	0.932717	NaN	60.288	92.49	NaN	NaN	NaN	NaN	NaN	0.857328	9.82319	3.15362e-05	60.288	NaN	NaN	NaN	NaN	NaN	NaN	NaN	NaN	NaN	NaN	NaN	NaN	NaN	NaN	NaN
O15042	36	O15042	O15042	U2 snRNP-associated SURP motif-containing protein	U2SURP	VHSSGSSDAHMDASGPSDSDMPSRTRPKSPR	174	P	4	457		0.999003	0.00025876	58.722	58.722	43.895	-0.0029725	39533000	36	30.0084	NaN	NaN	0.999003	NaN	NaN	58.722	NaN	NaN	NaN	NaN	NaN	NaN	NaN	NaN	NaN	NaN	NaN	NaN	NaN	NaN	NaN	NaN	NaN	NaN	NaN	NaN	NaN	NaN	NaN
O15042	42	O15042	O15042	U2 snRNP-associated SURP motif-containing protein	U2SURP	SDAHMDASGPSDSDMPSRTRPKSPRKHNYRN	175	P	4	457		0.500034	0.00346859	44.811	44.811	44.811	-0.15545	9794600	42	0	NaN	NaN	0.500034	NaN	NaN	44.811	NaN	NaN	NaN	NaN	NaN	NaN	NaN	NaN	NaN	NaN	NaN	NaN	NaN	NaN	NaN	NaN	NaN	NaN	NaN	NaN	NaN	NaN	NaN
O15054	644	O15054	O15054	Lysine-specific demethylase 6B	KDM6B	RPRVSFPKTPEVGPGPPPGPLSKAPQPVPPG	176	P	2	459		0.745334	0.00189824	98.943	77.479	98.943	0.18097	50674000000	644	0	0.745334	0.745334	0.744701	98.943	98.943	87.298	0.718346	0	0.0820922	60.434	0.707326	0	0.0306669	69.979	0.738142	0	0.0111436	78.655	0.708714	0	0.00858253	81.865	0.745334	0	0.00189824	98.943	0.718346	0	0.0820922
O15054	645	O15054	O15054	Lysine-specific demethylase 6B	KDM6B	PRVSFPKTPEVGPGPPPGPLSKAPQPVPPGV	177	P	2	459		0.745334	0.00189824	98.943	77.479	98.943	0.18097	50674000000	645	0	0.745334	0.745334	0.744701	98.943	98.943	87.298	0.725129	0	0.0820922	60.434	0.707326	0	0.0306669	69.979	0.738142	0	0.0111436	78.655	0.708714	0	0.00858253	81.865	0.745334	0	0.00189824	98.943	0.718346	0	0.0820922
O15054	646	O15054	O15054	Lysine-specific demethylase 6B	KDM6B	RVSFPKTPEVGPGPPPGPLSKAPQPVPPGVG	178	P	2	459		0.874453	0.00189824	98.943	77.479	72.434	0.64682	50674000000	646	4.70829	0.745334	0.874453	0.744701	98.943	98.943	87.298	0.727485	0	0.0820922	60.434	0.707326	0	0.0306669	69.979	0.738142	0	0.0111436	78.655	0.708714	0	0.00858253	81.865	0.745334	0	0.00189824	98.943	0.718346	0	0.0820922
O15054	648	O15054	O15054	Lysine-specific demethylase 6B	KDM6B	SFPKTPEVGPGPPPGPLSKAPQPVPPGVGEL	179	P	2	459		0.803626	0.00189824	98.943	77.479	67.726	0.19715	50674000000	648	2.22521	0.745334	0.745334	0.803626	98.943	98.943	87.298	0.727485	0	0.0820922	60.434	0.707326	0	0.0306669	69.979	0.738142	0	0.0111436	78.655	0.708714	0	0.00858253	81.865	0.745334	0	0.00189824	98.943	0.718346	0	0.0820922
O15056	1406	O15056	O15056	Synaptojanin-2	SYNJ2	SPDSDGTKAMKPEAAPLLGDYQDPFWNLLHH	180	P	5	460		0.59919	0.00420795	48.984	46.49	48.984	0.0039761	110720000	1406	1.74757	NaN	NaN	0.59919	NaN	NaN	48.984	NaN	NaN	NaN	NaN	NaN	NaN	NaN	NaN	NaN	NaN	NaN	NaN	NaN	NaN	NaN	NaN	NaN	NaN	NaN	NaN	NaN	NaN	NaN
O15067	423	O15067	O15067	Phosphoribosylformylglycinamidine synthase	PFAS	LGLQLPDGQRREWIKPIMFSGGIGSMEADHI	181	P	5	466		0.999706	6.65088e-07	69.873	69.873	45.748	-0.83487	277880000	423	32.3009	NaN	0.999706	0.724072	NaN	45.748	69.873	NaN	NaN	NaN	NaN	NaN	NaN	NaN	NaN	NaN	NaN	NaN	NaN	NaN	NaN	NaN	NaN	NaN	NaN	NaN	NaN	NaN	NaN	NaN
O15067	443	O15067	O15067	Phosphoribosylformylglycinamidine synthase	PFAS	GGIGSMEADHISKEAPEPGMEVVKVGGPVYR	182	P	5	466		0.500147	1.5652e-06	71.472	71.472	45.748	-0.83487	231300000	443	0	NaN	0.500147	NaN	NaN	71.472	NaN	NaN	NaN	NaN	NaN	NaN	NaN	NaN	NaN	NaN	NaN	NaN	NaN	NaN	NaN	NaN	NaN	NaN	NaN	NaN	NaN	NaN	NaN	NaN
O15067	445	O15067	O15067	Phosphoribosylformylglycinamidine synthase	PFAS	IGSMEADHISKEAPEPGMEVVKVGGPVYRIG	183	P	4	466		0.970747	6.64744e-07	118.77	118.77	96.098	-0.56229	504420000	445	15.2214	0.765771	0.942325	0.970747	69.625	118.77	96.098	NaN	NaN	NaN	NaN	0.765771	5.34448	0.00338255	42.582	0.742093	4.92406	6.64744e-07	69.625	NaN	NaN	NaN	NaN	NaN	NaN	NaN	NaN	NaN	NaN	NaN
O15067	1228	O15067	O15067	Phosphoribosylformylglycinamidine synthase	PFAS	PGPALMLRGMEGAVLPVWSAHGEGYVAFSSP	184	P	3	466		1	1.32036e-05	59.65	50.08	51.479	0.13739	60553000	1228	51.4786	1	1	1	59.65	52.268	51.479	1	59.6498	1.32036e-05	59.65	NaN	NaN	NaN	NaN	NaN	NaN	NaN	NaN	NaN	NaN	NaN	NaN	NaN	NaN	NaN	NaN	NaN	NaN	NaN
O15067	1243	O15067	O15067	Phosphoribosylformylglycinamidine synthase	PFAS	PVWSAHGEGYVAFSSPELQAQIEARGLAPLH	185	P	3	466		1	1.32036e-05	59.65	50.08	51.479	0.13739	60553000	1243	51.4786	1	1	1	59.65	52.268	51.479	1	59.6498	1.32036e-05	59.65	NaN	NaN	NaN	NaN	NaN	NaN	NaN	NaN	NaN	NaN	NaN	NaN	NaN	NaN	NaN	NaN	NaN	NaN	NaN
O15067	314	O15067	O15067	Phosphoribosylformylglycinamidine synthase	PFAS	QGLRHVVFTAETHNFPTGVCPFSGATTGTGG	186	P	3	466		0.827654	0.00153183	53.475	50.542	53.475	-0.24148	28428000	314	6.81449	0.827654	NaN	NaN	53.475	NaN	NaN	NaN	NaN	NaN	NaN	NaN	NaN	NaN	NaN	NaN	NaN	NaN	NaN	NaN	NaN	NaN	NaN	0.827654	6.81449	0.00153183	53.475	NaN	NaN	NaN
O15067	319	O15067	O15067	Phosphoribosylformylglycinamidine synthase	PFAS	VVFTAETHNFPTGVCPFSGATTGTGGRIRDV	187	P	4	466		0.702904	7.24986e-05	70.112	67.671	70.112	-0.80773	144540000	319	3.74	0.702904	NaN	NaN	70.112	NaN	NaN	NaN	NaN	NaN	NaN	NaN	NaN	NaN	NaN	NaN	NaN	NaN	NaN	NaN	NaN	NaN	NaN	0.702904	3.74	7.24986e-05	70.112	0.602851	1.81256	0.000296653
O15067	489	O15067	O15067	Phosphoribosylformylglycinamidine synthase	PFAS	DNTSDLDFGAVQRGDPEMEQKMNRVIRACVE	188	P	4	466		1	1.10179e-08	107.52	99.383	51.242	-1.3589	216930000	489	51.2422	1	1	1	51.242	72.842	107.52	NaN	NaN	NaN	NaN	NaN	NaN	NaN	NaN	NaN	NaN	NaN	NaN	1	51.2422	1.73125e-06	51.242	NaN	NaN	NaN	NaN	NaN	NaN	NaN
O15067	647	O15067	O15067	Phosphoribosylformylglycinamidine synthase	PFAS	VLGKMPRKEFFLQRKPPMLQPLALPPGLSVH	189	P	3	466		0.853686	0.000309887	72.916	70.926	66.871	0.076388	6658400000	647	8.41444	0.519951	0.853686	0.816568	67.76	66.871	72.916	0.494011	0	0.00070292	67.76	NaN	NaN	NaN	NaN	NaN	NaN	NaN	NaN	0.519951	0.473603	0.00390341	56.529	NaN	NaN	NaN	NaN	NaN	NaN	NaN
O15067	648	O15067	O15067	Phosphoribosylformylglycinamidine synthase	PFAS	LGKMPRKEFFLQRKPPMLQPLALPPGLSVHQ	190	P	4	466		0.494011	0.000642549	68.552	65.67	55.844	-0.81306	0	648	0	0.494011	0.482942	0.489835	67.76	44.848	68.552	0.494011	0	0.00070292	67.76	NaN	NaN	NaN	NaN	NaN	NaN	NaN	NaN	NaN	NaN	NaN	NaN	NaN	NaN	NaN	NaN	NaN	NaN	NaN
O15067	157	O15067	O15067	Phosphoribosylformylglycinamidine synthase	PFAS	LATLHDRMTEQHFPHPIQSFSPESMPEPLNG	191	P	4	466		0.526732	5.10355e-05	53.819	44.598	53.819	2.5437	21421000	157	0.498997	NaN	NaN	0.526732	NaN	NaN	53.819	NaN	NaN	NaN	NaN	NaN	NaN	NaN	NaN	NaN	NaN	NaN	NaN	NaN	NaN	NaN	NaN	NaN	NaN	NaN	NaN	NaN	NaN	NaN
O15067	832	O15067	O15067	Phosphoribosylformylglycinamidine synthase	PFAS	VRAPGSLVISAYAVCPDITATVTPDLKHPEG	192	P	3	466		0.997964	0.000335545	60.348	54.918	60.348	-1.3453	19263000	832	27.0549	0.997964	NaN	NaN	60.348	NaN	NaN	NaN	NaN	NaN	NaN	NaN	NaN	NaN	NaN	NaN	NaN	NaN	NaN	NaN	NaN	NaN	NaN	0.997964	27.0549	0.000335545	60.348	NaN	NaN	NaN
O15067	1003	O15067	O15067	Phosphoribosylformylglycinamidine synthase	PFAS	AMVRVSVNGAVVLEEPVGELRALWEETSFQL	193	P	4	466		1	7.75654e-07	99.372	89.437	76.063	-1.5014	202010000	1003	76.0632	NaN	1	1	NaN	99.372	70.062	NaN	NaN	NaN	NaN	NaN	NaN	NaN	NaN	NaN	NaN	NaN	NaN	NaN	NaN	NaN	NaN	NaN	NaN	NaN	NaN	NaN	NaN	NaN
O15067	1025	O15067	O15067	Phosphoribosylformylglycinamidine synthase	PFAS	LWEETSFQLDRLQAEPRCVAEEERGLRERMG	194	P	4	466		1	7.75654e-07	99.372	89.437	76.063	-1.5014	202010000	1025	76.0632	NaN	1	1	NaN	99.372	70.062	NaN	NaN	NaN	NaN	NaN	NaN	NaN	NaN	NaN	NaN	NaN	NaN	NaN	NaN	NaN	NaN	NaN	NaN	NaN	NaN	NaN	NaN	NaN
O15067	986	O15067	O15067	Phosphoribosylformylglycinamidine synthase	PFAS	AGLHCLELGHTGEAGPHAMVRVSVNGAVVLE	195	P	6	466		1	0.000235071	62.781	55.42	62.781	-0.31971	67558000	986	62.7808	NaN	1	NaN	NaN	62.781	NaN	NaN	NaN	NaN	NaN	NaN	NaN	NaN	NaN	NaN	NaN	NaN	NaN	NaN	NaN	NaN	NaN	NaN	NaN	NaN	NaN	NaN	NaN	NaN
O15111	91	O15111	O15111	Inhibitor of nuclear factor kappa-B kinase subunit alpha	CHUK	ACDVPEELNILIHDVPLLAMEYCSGGDLRKL	196	P	4	477		1	1.18599e-05	115.94	107.03	115.94	1.0639	314360000	91	80.2917	1	0.99982	0.999991	115.94	66.825	78.286	NaN	NaN	NaN	NaN	NaN	NaN	NaN	NaN	0.999959	43.8867	5.69583e-05	79.762	1	80.2917	1.18599e-05	115.94	NaN	NaN	NaN	NaN	NaN	NaN	NaN
O15118	1000	O15118	O15118	Niemann-Pick C1 protein	NPC1	EGKQRPQGGDFMRFLPMFLSDNPNPKCGKGG	197	P	2	479		1	0.00652644	109.42	92.787	109.42	-0.76086	183010000	1000	78.1327	NaN	1	1	NaN	109.42	101.38	NaN	NaN	NaN	NaN	NaN	NaN	NaN	NaN	NaN	NaN	NaN	NaN	NaN	NaN	NaN	NaN	NaN	NaN	NaN	NaN	NaN	NaN	NaN
O15143	180	O15143	O15143	Actin-related protein 2/3 complex subunit 1B	ARPC1B	KCRIFSAYIKEVEERPAPTPWGSKMPFGELM	198	P	4	486		0.711791	0.0342291	55.588	43.846	55.588	-0.6409	114350000	180	0.916156	0.711791	NaN	NaN	55.588	NaN	NaN	0.711791	0.916156	0.0342291	55.588	NaN	NaN	NaN	NaN	NaN	NaN	NaN	NaN	NaN	NaN	NaN	NaN	NaN	NaN	NaN	NaN	NaN	NaN	NaN
O15143	182	O15143	O15143	Actin-related protein 2/3 complex subunit 1B	ARPC1B	RIFSAYIKEVEERPAPTPWGSKMPFGELMFE	199	P	4	486		0.644104	0.0342291	55.588	43.846	55.588	-0.6409	114350000	182	0	0.644104	NaN	NaN	55.588	NaN	NaN	0.644104	0	0.0342291	55.588	NaN	NaN	NaN	NaN	NaN	NaN	NaN	NaN	NaN	NaN	NaN	NaN	NaN	NaN	NaN	NaN	NaN	NaN	NaN
O15143	184	O15143	O15143	Actin-related protein 2/3 complex subunit 1B	ARPC1B	FSAYIKEVEERPAPTPWGSKMPFGELMFESS	200	P	4	486		0.644104	0.0342291	55.588	43.846	55.588	-0.6409	114350000	184	0	0.644104	NaN	NaN	55.588	NaN	NaN	0.644104	0	0.0342291	55.588	NaN	NaN	NaN	NaN	NaN	NaN	NaN	NaN	NaN	NaN	NaN	NaN	NaN	NaN	NaN	NaN	NaN	NaN	NaN
O15144	103	O15144	O15144	Actin-related protein 2/3 complex subunit 2	ARPC2	ESGYNVSLLYDLENLPASKDSIVHQAGMLKR	201	P	4	487		1	6.91034e-10	104.28	100.28	104.28	-0.090919	167660000	103	80.8001	1	NaN	0.999975	104.28	NaN	68.333	NaN	NaN	NaN	NaN	NaN	NaN	NaN	NaN	NaN	NaN	NaN	NaN	1	80.8001	2.74249e-08	104.28	NaN	NaN	NaN	NaN	NaN	NaN	NaN
O15160	317	O15160	O15160	DNA-directed RNA polymerases I and III subunit RPAC1	POLR1C	VRDHYIFSVESTGVLPPDVLVSEAIKVLMGK	202	P	4	491		0.5	0.000471381	55.046	49.834	49.968	-0.26704	529560000	317	0	NaN	0.5	0.5	NaN	55.046	49.968	NaN	NaN	NaN	NaN	NaN	NaN	NaN	NaN	NaN	NaN	NaN	NaN	NaN	NaN	NaN	NaN	NaN	NaN	NaN	NaN	NaN	NaN	NaN
O15160	318	O15160	O15160	DNA-directed RNA polymerases I and III subunit RPAC1	POLR1C	RDHYIFSVESTGVLPPDVLVSEAIKVLMGKC	203	P	4	491		0.5	0.000471381	55.046	49.834	49.968	-0.26704	529560000	318	0	NaN	0.5	0.5	NaN	55.046	49.968	NaN	NaN	NaN	NaN	NaN	NaN	NaN	NaN	NaN	NaN	NaN	NaN	NaN	NaN	NaN	NaN	NaN	NaN	NaN	NaN	NaN	NaN	NaN
O15164	673	O15164	O15164	Transcription intermediary factor 1-alpha	TRIM24	VQSPNSSVPSPGLAGPVTMTSVHPPIRSPSA	204	P	3	493		0.979235	0.000132232	83.283	76.331	83.283	1.4114	13170000	673	19.9221	NaN	0.979235	NaN	NaN	83.283	NaN	NaN	NaN	NaN	NaN	NaN	NaN	NaN	NaN	NaN	NaN	NaN	NaN	NaN	NaN	NaN	NaN	NaN	NaN	NaN	NaN	NaN	NaN	NaN
O15213	346	O15213	O15213	WD repeat-containing protein 46	WDR46	VIHLGHSNGTVSLWSPAMKEPLAKILCHRGG	205	P	6	501		0.840075	0.000169256	42.863	38.629	42.863	1.7698	61857000	346	7.42787	NaN	0.840075	NaN	NaN	42.863	NaN	NaN	NaN	NaN	NaN	NaN	NaN	NaN	NaN	NaN	NaN	NaN	NaN	NaN	NaN	NaN	NaN	NaN	NaN	NaN	NaN	NaN	NaN	NaN
O15226	93	O15226	O15226	NF-kappa-B-repressing factor	NKRF	PQTKEVNEQTHFASMPRDIYQDYTQDSFSIQ	206	P	3	503		1	0.00211553	88.087	67.246	64.104	-0.68799	918780000	93	64.1035	1	1	1	88.087	86.467	79.466	1	52.2654	0.0587375	52.265	NaN	NaN	NaN	NaN	NaN	NaN	NaN	NaN	1	88.0866	0.00211553	88.087	NaN	NaN	NaN	NaN	1	58.2104	0.0358678
O15270	470	O15270	O15270	Serine palmitoyltransferase 2	SPTLC2	EMGFIIYGNEDSPVVPLMLYMPAKIGAFGRE	207	P	4	516		0.997787	0.000292445	64.722	64.722	64.722	0.20164	229020000	470	26.5762	0.895503	0.997787	NaN	64.722	64.722	NaN	0.872053	9.13403	0.0031555	47.52	0.883594	9.20929	0.00113252	53.259	0.895503	9.97871	0.000292445	64.722	NaN	NaN	NaN	NaN	NaN	NaN	NaN	NaN	NaN	NaN	NaN
O15270	476	O15270	O15270	Serine palmitoyltransferase 2	SPTLC2	YGNEDSPVVPLMLYMPAKIGAFGREMLKRNI	208	P	4	516		0.999617	0.00334755	64.722	64.722	64.722	0.20164	39563000	476	34.3851	NaN	0.999617	NaN	NaN	64.722	NaN	NaN	NaN	NaN	NaN	NaN	NaN	NaN	NaN	NaN	NaN	NaN	NaN	NaN	NaN	NaN	NaN	NaN	NaN	NaN	NaN	NaN	NaN	NaN
O15294	700	O15294	O15294	UDP-N-acetylglucosamine--peptide N-acetylglucosaminyltransferase 110 kDa subunit	OGT	PAEVAEQYSEKLAYMPHTFFIGDHANMFPHL	209	P	5	518		0.987667	0.00396407	56.327	43.65	56.327	-0.62564	222410000	700	19.0354	0.987667	NaN	NaN	56.327	NaN	NaN	0.987667	19.0354	0.00396407	56.327	NaN	NaN	NaN	NaN	NaN	NaN	NaN	NaN	NaN	NaN	NaN	NaN	NaN	NaN	NaN	NaN	NaN	NaN	NaN
O15294	324	O15294	O15294	UDP-N-acetylglucosamine--peptide N-acetylglucosaminyltransferase 110 kDa subunit	OGT	VAEAEDCYNTALRLCPTHADSLNNLANIKRE	210	P	3	518		1	0.000988015	82.102	71.617	82.102	-0.13481	18870000	324	82.1017	1	NaN	NaN	82.102	NaN	NaN	NaN	NaN	NaN	NaN	NaN	NaN	NaN	NaN	NaN	NaN	NaN	NaN	NaN	NaN	NaN	NaN	1	82.1017	0.000988015	82.102	NaN	NaN	NaN
O15327	485	O15327	O15327	Type II inositol 3,4-bisphosphate 4-phosphatase	INPP4B	LLALYTARPGGILKKPPSPKSSTEESSPQDQ	211	P	2	525		0.417544	0.0205506	44.132	18.414	44.132	2.9642	0	485	1.5637	NaN	NaN	0.417544	NaN	NaN	44.132	NaN	NaN	NaN	NaN	NaN	NaN	NaN	NaN	NaN	NaN	NaN	NaN	NaN	NaN	NaN	NaN	NaN	NaN	NaN	NaN	NaN	NaN	NaN
O15327	497	O15327	O15327	Type II inositol 3,4-bisphosphate 4-phosphatase	INPP4B	LKKPPSPKSSTEESSPQDQPPVMRGQDSIPH	212	P	2	525		0.666604	0.0205506	44.132	18.414	44.132	2.9642	34694000	497	0	NaN	NaN	0.666604	NaN	NaN	44.132	NaN	NaN	NaN	NaN	NaN	NaN	NaN	NaN	NaN	NaN	NaN	NaN	NaN	NaN	NaN	NaN	NaN	NaN	NaN	NaN	NaN	NaN	NaN
O15327	501	O15327	O15327	Type II inositol 3,4-bisphosphate 4-phosphatase	INPP4B	PSPKSSTEESSPQDQPPVMRGQDSIPHHSDY	213	P	2	525		0.666604	0.0205506	44.132	18.414	44.132	2.9642	34694000	501	0	NaN	NaN	0.666604	NaN	NaN	44.132	NaN	NaN	NaN	NaN	NaN	NaN	NaN	NaN	NaN	NaN	NaN	NaN	NaN	NaN	NaN	NaN	NaN	NaN	NaN	NaN	NaN	NaN	NaN
O15327	502	O15327	O15327	Type II inositol 3,4-bisphosphate 4-phosphatase	INPP4B	SPKSSTEESSPQDQPPVMRGQDSIPHHSDYD	214	P	2	525		0.666604	0.0205506	44.132	18.414	44.132	2.9642	34694000	502	0	NaN	NaN	0.666604	NaN	NaN	44.132	NaN	NaN	NaN	NaN	NaN	NaN	NaN	NaN	NaN	NaN	NaN	NaN	NaN	NaN	NaN	NaN	NaN	NaN	NaN	NaN	NaN	NaN	NaN
O15355	230	O15355	O15355	Protein phosphatase 1G	PPM1G	SSNSERGTEAGQVGEPGIPTGEAGPSCSSAS	215	P	3	530		0.371437	0.00695218	50.499	44.616	46.296	-0.54491	0	230	0.784987	0	0	0.371437	NaN	NaN	50.499	NaN	NaN	NaN	NaN	NaN	NaN	NaN	NaN	0	0	NaN	NaN	NaN	NaN	NaN	NaN	NaN	NaN	NaN	NaN	NaN	NaN	NaN
O15355	233	O15355	O15355	Protein phosphatase 1G	PPM1G	SERGTEAGQVGEPGIPTGEAGPSCSSASDKL	216	P	3	530		0.466616	9.92329e-05	75.529	72.532	75.529	0.25456	0	233	0	0.4532	0.466616	NaN	57.351	75.529	NaN	0.405495	0	0.0186131	48.305	0.4532	0	0.01445	49.088	0	0	NaN	NaN	0.449517	0	0.000407321	57.351	NaN	NaN	NaN	NaN	NaN	NaN	NaN
O15355	239	O15355	O15355	Protein phosphatase 1G	PPM1G	AGQVGEPGIPTGEAGPSCSSASDKLPRVAKS	217	P	3	530		0.623111	9.92329e-05	75.529	72.532	43.956	0.4874	9895000	239	4.94162	0.4532	0.466616	0.623111	57.351	75.529	43.956	0.405495	0	0.0186131	48.305	0.4532	0	0.01445	49.088	0	0	NaN	NaN	0.449517	0	0.000407321	57.351	NaN	NaN	NaN	NaN	NaN	NaN	NaN
O15355	413	O15355	O15355	Protein phosphatase 1G	PPM1G	RAIGDHFYKRNKNLPPEEQMISALPDIKVLT	218	P	3	530		0.80462	0.0259113	51.591	41.106	51.591	0.099988	152030000	413	6.15355	0.80462	NaN	NaN	51.591	NaN	NaN	NaN	NaN	NaN	NaN	NaN	NaN	NaN	NaN	0.80462	6.15355	0.0259113	51.591	NaN	NaN	NaN	NaN	NaN	NaN	NaN	NaN	NaN	NaN	NaN
O15357	242	O15357	O15357	Phosphatidylinositol 3,4,5-trisphosphate 5-phosphatase 2	INPPL1	SGLEILSKVFDQQSSPMVTRLLQQQNLPQTG	219	P	2	531		1	0.00418057	134.84	115.87	134.84	-0.21937	12419000	242	134.844	NaN	NaN	1	NaN	NaN	134.84	NaN	NaN	NaN	NaN	NaN	NaN	NaN	NaN	NaN	NaN	NaN	NaN	NaN	NaN	NaN	NaN	NaN	NaN	NaN	NaN	NaN	NaN	NaN
O15371	22	O15371	O15371	Eukaryotic translation initiation factor 3 subunit D	EIF3D	PVIQDNPSGWGPCAVPEQFRDMPYQPFSKGD	220	P	3	534		0.78292	0.000229435	59.598	55.563	59.598	-0.57743	89068000	22	7.36089	0.606428	NaN	0.78292	49.626	NaN	59.598	NaN	NaN	NaN	NaN	NaN	NaN	NaN	NaN	0.606428	3.0856	0.000229435	49.626	NaN	NaN	NaN	NaN	NaN	NaN	NaN	NaN	NaN	NaN	NaN
O15371	29	O15371	O15371	Eukaryotic translation initiation factor 3 subunit D	EIF3D	SGWGPCAVPEQFRDMPYQPFSKGDRLGKVAD	221	P	4	534		0.772045	1.83044e-07	67.198	62.711	67.198	1.2581	57612000	29	5.97026	NaN	0.772045	NaN	NaN	67.198	NaN	NaN	NaN	NaN	NaN	NaN	NaN	NaN	NaN	NaN	NaN	NaN	NaN	NaN	NaN	NaN	NaN	NaN	NaN	NaN	NaN	NaN	NaN	NaN
O15371	342	O15371	O15371	Eukaryotic translation initiation factor 3 subunit D	EIF3D	CLRMGKERYNFPNPNPFVEDDMDKNEIASVA	222	P	2	534		0.999836	2.842e-17	149.3	138.25	149.3	0.54948	1421400000	342	37.8645	0.999836	0.992436	0.998229	149.3	75.23	149.3	0.997694	26.375	3.42618e-07	133.71	NaN	NaN	NaN	NaN	NaN	NaN	NaN	NaN	0.999836	37.8645	2.842e-17	149.3	NaN	NaN	NaN	NaN	NaN	NaN	NaN
O15379	23	O15379	O15379	Histone deacetylase 3	HDAC3	FYDPDVGNFHYGAGHPMKPHRLALTHSLVLH	223	P	4	536		0.999554	0.0215427	40.381	36.854	40.381	-0.93578	8961000	23	33.5064	0.999554	NaN	NaN	40.381	NaN	NaN	NaN	NaN	NaN	NaN	NaN	NaN	NaN	NaN	NaN	NaN	NaN	NaN	NaN	NaN	NaN	NaN	0.999554	33.5064	0.0215427	40.381	NaN	NaN	NaN
O15381	649	O15381	O15381	Nuclear valosin-containing protein-like	NVL	AVANESGLNFISVKGPELLNMYVGESERAVR	224	P	3	537		1	0.0170312	50.705	39.393	50.705	-0.33977	44117000	649	50.7045	1	NaN	NaN	50.705	NaN	NaN	NaN	NaN	NaN	NaN	NaN	NaN	NaN	NaN	NaN	NaN	NaN	NaN	1	50.7045	0.0170312	50.705	NaN	NaN	NaN	NaN	NaN	NaN	NaN
O15381	151	O15381	O15381	Nuclear valosin-containing protein-like	NVL	SNTPEMEQRETTSSTPRISSKTGSIPLKTPA	225	P	4	537		0.929246	0.0216472	54.223	51.782	40.682	0.11614	169950000	151	11.1893	NaN	0.929246	0.575025	NaN	40.682	54.223	NaN	NaN	NaN	NaN	NaN	NaN	NaN	NaN	NaN	NaN	NaN	NaN	NaN	NaN	NaN	NaN	NaN	NaN	NaN	NaN	NaN	NaN	NaN
O15381	467	O15381	O15381	Nuclear valosin-containing protein-like	NVL	RLPQAFDFCHLAHLTPGFVGADLMALCREAA	226	P	5	537		0.999726	0.00667078	45.957	40.177	45.957	0.18791	38110000	467	35.6277	NaN	0.999726	NaN	NaN	45.957	NaN	NaN	NaN	NaN	NaN	NaN	NaN	NaN	NaN	NaN	NaN	NaN	NaN	NaN	NaN	NaN	NaN	NaN	NaN	NaN	NaN	NaN	NaN	NaN
O15382	360	O15382	O15382	Branched-chain-amino-acid aminotransferase, mitochondrial	BCAT2	CPVHRILYKDRNLHIPTMENGPELILRFQKE	227	P	5	538		0.999876	2.40477e-05	84.425	84.425	84.425	0.048237	71366000	360	39.0554	NaN	0.999876	NaN	NaN	84.425	NaN	NaN	NaN	NaN	NaN	NaN	NaN	NaN	NaN	NaN	NaN	NaN	NaN	NaN	NaN	NaN	NaN	NaN	NaN	NaN	NaN	NaN	NaN	NaN
O15397	538	O15397	O15397	Importin-8	IPO8	QSLISNQIQAKEYMKPHVRPIMQELLHIVRE	228	P	4	541		0.55419	0.0108498	54.288	54.288	54.288	0.061706	71394000	538	1.01018	NaN	0.542284	0.55419	NaN	47.047	54.288	NaN	NaN	NaN	NaN	NaN	NaN	NaN	NaN	NaN	NaN	NaN	NaN	NaN	NaN	NaN	NaN	NaN	NaN	NaN	NaN	NaN	NaN	NaN
O15397	513	O15397	O15397	Importin-8	IPO8	AVELAKKSLIEDKEMPVKVEAALALQSLISN	229	P	4	541		1	0.00231223	50.144	44.6	50.144	-0.30272	13670000	513	50.144	1	NaN	NaN	50.144	NaN	NaN	1	50.144	0.00231223	50.144	NaN	NaN	NaN	NaN	NaN	NaN	NaN	NaN	NaN	NaN	NaN	NaN	NaN	NaN	NaN	NaN	NaN	NaN	NaN
O15431	107	O15431	O15431	High affinity copper uptake protein 1	SLC31A1	SLLRKSQVSIRYNSMPVPGPNGTILMETHKT	230	P	3	545		0.993732	0.000460212	85.231	81.843	85.231	0.53393	93695000	107	22.2653	NaN	NaN	0.993732	NaN	NaN	85.231	NaN	NaN	NaN	NaN	NaN	NaN	NaN	NaN	NaN	NaN	NaN	NaN	NaN	NaN	NaN	NaN	NaN	NaN	NaN	NaN	NaN	NaN	NaN
O15446	473	O15446	O15446	DNA-directed RNA polymerase I subunit RPA34	CD3EAP	GSTKKRKKQSQESRMPETVPQEEMPGPPLNS	231	P	3	548		0.999536	0.0100271	67.496	67.496	67.496	-1.8459	11430000	473	37.6366	NaN	0.999536	NaN	NaN	67.496	NaN	NaN	NaN	NaN	NaN	NaN	NaN	NaN	NaN	NaN	NaN	NaN	NaN	NaN	NaN	NaN	NaN	NaN	NaN	NaN	NaN	NaN	NaN	NaN
O15446	477	O15446	O15446	DNA-directed RNA polymerase I subunit RPA34	CD3EAP	KRKKQSQESRMPETVPQEEMPGPPLNSESGE	232	P	3	548		0.981648	2.39952e-05	73.805	73.805	68.895	-0.49535	149210000	477	20.1357	0.742963	0.981648	0.941532	60.621	68.895	73.805	NaN	NaN	NaN	NaN	NaN	NaN	NaN	NaN	0.742963	6.99674	0.000363836	60.621	0.519994	1.45674	0.00157975	51.956	NaN	NaN	NaN	NaN	NaN	NaN	NaN
O15446	482	O15446	O15446	DNA-directed RNA polymerase I subunit RPA34	CD3EAP	SQESRMPETVPQEEMPGPPLNSESGEEAPTG	233	P	3	548		0.602831	0.024675	47.919	41.759	47.919	-0.34099	12753000	482	6.3579	NaN	NaN	0.602831	NaN	NaN	47.919	NaN	NaN	NaN	NaN	NaN	NaN	NaN	NaN	NaN	NaN	NaN	NaN	NaN	NaN	NaN	NaN	NaN	NaN	NaN	NaN	NaN	NaN	NaN
O15498	111	O15498	O15498	Synaptobrevin homolog YKT6	YKT6	KVLDEFSKQVDRIDWPVGSPATIHYPALDGH	234	P	6	552		0.993663	0.0010902	46.54	37.702	46.54	-4.4854	11438000	111	22.067	NaN	NaN	0.993663	NaN	NaN	46.54	NaN	NaN	NaN	NaN	NaN	NaN	NaN	NaN	NaN	NaN	NaN	NaN	NaN	NaN	NaN	NaN	NaN	NaN	NaN	NaN	NaN	NaN	NaN
O15511	117	O15511	O15511	Actin-related protein 2/3 complex subunit 5	ARPC5	GVDLLMKYIYKGFESPSDNSSAMLLQWHEKA	235	P	4	555		1	1.78838e-05	77.211	71.37	77.211	0.30447	64600000	117	77.2113	NaN	NaN	1	NaN	NaN	77.211	NaN	NaN	NaN	NaN	NaN	NaN	NaN	NaN	NaN	NaN	NaN	NaN	NaN	NaN	NaN	NaN	NaN	NaN	NaN	NaN	NaN	NaN	NaN
O15541	65	O15541	O15541	RING finger protein 113A	RNF113A	GCTVVRPEKKRVTHNPMIQKTRDSGKQKAAY	236	P	2	566		1	0.0110302	149.65	106.53	149.65	-0.30973	30458000	65	149.653	NaN	1	NaN	NaN	149.65	NaN	NaN	NaN	NaN	NaN	NaN	NaN	NaN	NaN	NaN	NaN	NaN	NaN	NaN	NaN	NaN	NaN	NaN	NaN	NaN	NaN	NaN	NaN	NaN
O43143	763	O43143	O43143	Pre-mRNA-splicing factor ATP-dependent RNA helicase DHX15	DHX15	RTCTDIKPEWLVKIAPQYYDMSNFPQCEAKR	237	P	3	568		0.999354	0.0239399	50.653	47.265	50.653	-0.44157	138660000	763	31.8937	0.999354	NaN	0.998626	50.653	NaN	47.548	0.997443	25.9111	0.077959	44.734	NaN	NaN	NaN	NaN	NaN	NaN	NaN	NaN	NaN	NaN	NaN	NaN	0.999354	31.8937	0.0239399	50.653	NaN	NaN	NaN
O43143	533	O43143	O43143	Pre-mRNA-splicing factor ATP-dependent RNA helicase DHX15	DHX15	GIDDLVHFDFMDPPAPETLMRALELLNYLAA	238	P	3	568		0.965333	1.40828e-08	110.9	110.9	91.643	0.086662	1518200000	533	14.8986	0.963162	0.965333	NaN	110.9	91.643	NaN	0.722663	4.48961	0.000236966	72.935	NaN	NaN	NaN	NaN	0.963162	14.3619	1.40828e-08	110.9	NaN	NaN	NaN	NaN	NaN	NaN	NaN	NaN	NaN	NaN	NaN
O43149	1878	O43149	O43149	Zinc finger ZZ-type and EF-hand domain-containing protein 1	ZZEF1	KYSYGHLPTHSITAHPMVTIRISDRQRLIQP	239	P	5	570		0.999923	0.00481789	57.496	48.212	55.007	0.15406	224130000	1878	41.1352	0.999923	NaN	0.935588	57.496	NaN	41.257	NaN	NaN	NaN	NaN	0.999923	41.1352	0.00621525	55.007	NaN	NaN	NaN	NaN	0.961384	13.9613	0.00481789	57.496	NaN	NaN	NaN	NaN	NaN	NaN	NaN
O43164	47	O43164	O43164	E3 ubiquitin-protein ligase Praja-2	PJA2	TGRRYGRRHAYVSFKPCMTRHERSLGRAGDD	240	P	3	576		1	0.0141773	93.011	63.204	93.011	-0.28335	40158000	47	93.0108	NaN	NaN	1	NaN	NaN	93.011	NaN	NaN	NaN	NaN	NaN	NaN	NaN	NaN	NaN	NaN	NaN	NaN	NaN	NaN	NaN	NaN	NaN	NaN	NaN	NaN	NaN	NaN	NaN
O43175	99	O43175	O43175	D-3-phosphoglycerate dehydrogenase	PHGDH	DLEAATRKGILVMNTPNGNSLSAAELTCGMI	241	P	3	581		1	0.000553753	45.862	39.767	45.862	-0.098745	7071500	99	45.8622	NaN	NaN	1	NaN	NaN	45.862	NaN	NaN	NaN	NaN	NaN	NaN	NaN	NaN	NaN	NaN	NaN	NaN	NaN	NaN	NaN	NaN	NaN	NaN	NaN	NaN	NaN	NaN	NaN
O43175	327	O43175	O43175	D-3-phosphoglycerate dehydrogenase	PHGDH	LTGVVNAQALTSAFSPHTKPWIGLAEALGTL	242	P	4	581		1	4.3736e-101	224.06	208.89	48.467	0.87668	7559700000	327	48.4671	1	1	1	224.06	210.93	168.96	1	183.482	0	183.48	1	83.1975	2.58032e-15	141.65	1	61.5831	0	224.06	1	104.897	2.69842e-06	110.16	NaN	NaN	NaN	NaN	NaN	NaN	NaN
O43175	331	O43175	O43175	D-3-phosphoglycerate dehydrogenase	PHGDH	VNAQALTSAFSPHTKPWIGLAEALGTLMRAW	243	P	4	581		1	4.3736e-101	224.06	208.89	48.467	0.87668	7936000000	331	48.4671	1	1	1	224.06	210.93	168.96	1	183.482	0	183.48	1	83.1975	2.58032e-15	141.65	1	61.5831	0	224.06	1	104.897	2.69842e-06	110.16	NaN	NaN	NaN	NaN	NaN	NaN	NaN
O43175	475	O43175	O43175	D-3-phosphoglycerate dehydrogenase	PHGDH	RRDLPLLLFRTQTSDPAMLPTMIGLLAEAGV	244	P	3	581		1	0.019256	65.943	46.62	41.482	-1.9402	150660000	475	41.4823	1	0	1	65.943	NaN	41.482	NaN	NaN	NaN	NaN	NaN	NaN	NaN	NaN	NaN	NaN	NaN	NaN	1	65.9014	0.0227247	65.901	0.997721	26.4119	0.081908	65.943	NaN	NaN	NaN
O43175	479	O43175	O43175	D-3-phosphoglycerate dehydrogenase	PHGDH	PLLLFRTQTSDPAMLPTMIGLLAEAGVRLLS	245	P	3	581		1	6.59557e-30	195.2	180.77	41.482	-1.9402	1440600000	479	41.4823	1	1	1	195.2	142.1	70.315	1	87.8494	6.59557e-30	195.2	NaN	NaN	NaN	NaN	0.981059	17.1429	5.84571e-10	129.38	1	65.9014	0.0227247	65.901	NaN	NaN	NaN	NaN	NaN	NaN	NaN
O43181	120	O43181	O43181	NADH dehydrogenase [ubiquinone] iron-sulfur protein 4, mitochondrial	NDUFS4	ERWENPLMGWASTADPLSNMVLTFSTKEDAV	246	P	4	582		0.918125	9.48539e-06	50.85	50.85	50.85	-0.51294	37807000	120	10.5018	NaN	NaN	0.918125	NaN	NaN	50.85	NaN	NaN	NaN	NaN	NaN	NaN	NaN	NaN	NaN	NaN	NaN	NaN	NaN	NaN	NaN	NaN	NaN	NaN	NaN	NaN	NaN	NaN	NaN
O43237	479	O43237	O43237	Cytoplasmic dynein 1 light intermediate chain 2	DYNC1LI2	VLSNVQEELDRMTRKPDSMVTNSSTENEA__	247	P	2	585		1	0.000270329	140.14	130.49	132.32	-0.63704	1857500000	479	132.323	1	1	1	126.76	90.05	140.14	1	64.4386	0.016428	64.439	NaN	NaN	NaN	NaN	1	121.021	0.0520608	121.02	1	126.765	0.0159875	126.76	NaN	NaN	NaN	NaN	NaN	NaN	NaN
O43242	133	O43242	O43242	26S proteasome non-ATPase regulatory subunit 3	PSMD3	QGFFTSNNATRDFLLPFLEEPMDTEADLQFR	248	P	3	586		0.665997	5.4694e-09	123.82	119.01	52.198	0.15914	253380000	133	2.99931	NaN	NaN	0.665997	NaN	NaN	123.82	NaN	NaN	NaN	NaN	NaN	NaN	NaN	NaN	NaN	NaN	NaN	NaN	NaN	NaN	NaN	NaN	NaN	NaN	NaN	NaN	NaN	NaN	NaN
O43242	138	O43242	O43242	26S proteasome non-ATPase regulatory subunit 3	PSMD3	SNNATRDFLLPFLEEPMDTEADLQFRPRTGK	249	P	3	586	+	0.99948	1.27265e-41	175.34	160.31	94.463	0.28004	1682600000	138	33.2827	0.99948	0.997442	0.982209	175.34	90.22	63.869	NaN	NaN	NaN	NaN	0.99948	33.2827	6.76198e-06	94.463	0.997619	28.0389	1.27266e-41	175.34	NaN	NaN	NaN	NaN	NaN	NaN	NaN	NaN	NaN	NaN	NaN
O43242	359	O43242	O43242	26S proteasome non-ATPase regulatory subunit 3	PSMD3	DRLQFRQPSLKRSLMPYFLLTQAVRTGNLAK	250	P	3	586		1	0.00279387	87.719	73.69	87.719	-0.53335	11672000	359	87.7194	1	NaN	1	87.719	NaN	54.343	NaN	NaN	NaN	NaN	NaN	NaN	NaN	NaN	1	87.7194	0.00279387	87.719	NaN	NaN	NaN	NaN	NaN	NaN	NaN	NaN	NaN	NaN	NaN
O43252	524	O43252	O43252	Bifunctional 3'-phosphoadenosine 5'-phosphosulfate synthase 1;Sulfate adenylyltransferase;Adenylyl-sulfate kinase	PAPSS1	ARMVAGANFYIVGRDPAGMPHPETGKDLYEP	251	P	4	588		0.898711	2.23829e-07	67.809	48.942	61.511	0.10506	291150000	524	10.0081	0.781867	0.885658	0.898711	67.809	53.553	61.511	NaN	NaN	NaN	NaN	0.781867	5.85133	2.23829e-07	67.809	0.49007	0.558085	8.82403e-07	62.663	0.707241	4.66641	0.00122295	43.728	NaN	NaN	NaN	NaN	NaN	NaN	NaN
O43252	464	O43252	O43252	Bifunctional 3'-phosphoadenosine 5'-phosphosulfate synthase 1;Sulfate adenylyltransferase;Adenylyl-sulfate kinase	PAPSS1	LLLHPLGGWTKDDDVPLMWRMKQHAAVLEEG	252	P	4	588		1	9.5219e-05	82.593	76.526	82.593	0.15785	252810000	464	70.1601	0.999946	1	0.999996	50.215	82.593	66.871	NaN	NaN	NaN	NaN	NaN	NaN	NaN	NaN	0.999946	43.5657	0.0114076	50.215	NaN	NaN	NaN	NaN	NaN	NaN	NaN	NaN	NaN	NaN	NaN
O43252	550	O43252	O43252	Bifunctional 3'-phosphoadenosine 5'-phosphosulfate synthase 1;Sulfate adenylyltransferase;Adenylyl-sulfate kinase	PAPSS1	DLYEPSHGAKVLTMAPGLITLEIVPFRVAAY	253	P	2	588		0.999997	0.0139369	66.262	53.495	66.262	-0.71344	1833100	550	55.357	NaN	NaN	0.999997	NaN	NaN	66.262	NaN	NaN	NaN	NaN	NaN	NaN	NaN	NaN	NaN	NaN	NaN	NaN	NaN	NaN	NaN	NaN	NaN	NaN	NaN	NaN	NaN	NaN	NaN
O43264	51	O43264	O43264	Centromere/kinetochore protein zw10 homolog	ZW10	GEVCNMISKKYSEFLPSMQSAQGLITQVDKL	254	P	3	590		1	0.000126725	116.87	112.01	116.87	-0.75091	330550000	51	116.87	1	NaN	1	116.87	NaN	109.25	NaN	NaN	NaN	NaN	1	116.87	0.000126725	116.87	0	0	NaN	NaN	NaN	NaN	NaN	NaN	NaN	NaN	NaN	NaN	NaN	NaN	NaN
O43290	29	O43290	O43290	U4/U6.U5 tri-snRNP-associated protein 1	SART1	AGTTAAAGTGGATEQPPRHREHKKHKHRSGG	255	P	5	593	+	0.5	0.00012287	75.646	72.895	75.646	-1.4394	13606000	29	0	NaN	NaN	0.5	NaN	NaN	75.646	NaN	NaN	NaN	NaN	NaN	NaN	NaN	NaN	NaN	NaN	NaN	NaN	NaN	NaN	NaN	NaN	NaN	NaN	NaN	NaN	NaN	NaN	NaN
O43290	30	O43290	O43290	U4/U6.U5 tri-snRNP-associated protein 1	SART1	GTTAAAGTGGATEQPPRHREHKKHKHRSGGS	256	P	5	593	+	0.5	0.00012287	75.646	72.895	75.646	-1.4394	13606000	30	0	NaN	NaN	0.5	NaN	NaN	75.646	NaN	NaN	NaN	NaN	NaN	NaN	NaN	NaN	NaN	NaN	NaN	NaN	NaN	NaN	NaN	NaN	NaN	NaN	NaN	NaN	NaN	NaN	NaN
O43290	158	O43290	O43290	U4/U6.U5 tri-snRNP-associated protein 1	SART1	EAGTKEEPVTADVINPMALRQREELREKLAA	257	P	3	593		1	3.92563e-22	192.4	172.39	133.94	-0.3277	1811400000	158	119.426	1	1	1	106.7	192.4	83.948	NaN	NaN	NaN	NaN	1	92.9413	4.35772e-05	106.7	NaN	NaN	NaN	NaN	NaN	NaN	NaN	NaN	NaN	NaN	NaN	NaN	NaN	NaN	NaN
O43290	393	O43290	O43290	U4/U6.U5 tri-snRNP-associated protein 1	SART1	SLSTVGPRLASEYLTPEEMVTFKKTKRRVKK	258	P	2	593		1	4.7033e-06	130.56	100.42	130.56	0.72283	0	393	130.563	NaN	1	NaN	NaN	130.56	NaN	NaN	NaN	NaN	NaN	NaN	NaN	NaN	NaN	NaN	NaN	NaN	NaN	NaN	NaN	NaN	NaN	NaN	NaN	NaN	NaN	NaN	NaN	NaN
O43290	567	O43290	O43290	U4/U6.U5 tri-snRNP-associated protein 1	SART1	VFNATSEFCRTLGEIPTYGLAGNREEQEELM	259	P	4	593		1	0.00688473	46.296	36.149	46.296	-0.76425	49487000	567	46.2961	NaN	NaN	1	NaN	NaN	46.296	NaN	NaN	NaN	NaN	NaN	NaN	NaN	NaN	NaN	NaN	NaN	NaN	NaN	NaN	NaN	NaN	NaN	NaN	NaN	NaN	NaN	NaN	NaN
O43314	950	O43314	O43314	Inositol hexakisphosphate and diphosphoinositol-pentakisphosphate kinase 2	PPIP5K2	TSKRDEVDRAVILFKPMVSEPIHIHRKSPLP	260	P	4	605		0.99908	0.000680389	81.144	62.384	81.144	-0.33263	40693000	950	30.3566	NaN	0.99908	0.998154	NaN	81.144	70.783	NaN	NaN	NaN	NaN	NaN	NaN	NaN	NaN	NaN	NaN	NaN	NaN	NaN	NaN	NaN	NaN	NaN	NaN	NaN	NaN	NaN	NaN	NaN
O43347	290	O43347	O43347	RNA-binding protein Musashi homolog 1	MSI1	AAAAAAAVVRGTGSHPWTMAPPPGSTPSRTG	261	P	3	609	+	0.992705	0.00764192	58.997	49.592	58.997	0.85978	261470000	290	21.4453	NaN	NaN	0.992705	NaN	NaN	58.997	NaN	NaN	NaN	NaN	NaN	NaN	NaN	NaN	NaN	NaN	NaN	NaN	NaN	NaN	NaN	NaN	NaN	NaN	NaN	NaN	NaN	NaN	NaN
O43353	277	O43353	O43353	Receptor-interacting serine/threonine-protein kinase 2	RIPK2	RARMISLIESGWAQNPDERPSFLKCLIELEP	262	P	3	610		1	0.00111875	65.784	61.478	65.784	-1.6047	19100000	277	65.7837	NaN	1	NaN	NaN	65.784	NaN	NaN	NaN	NaN	NaN	NaN	NaN	NaN	NaN	NaN	NaN	NaN	NaN	NaN	NaN	NaN	NaN	NaN	NaN	NaN	NaN	NaN	NaN	NaN
O43353	281	O43353	O43353	Receptor-interacting serine/threonine-protein kinase 2	RIPK2	ISLIESGWAQNPDERPSFLKCLIELEPVLRT	263	P	3	610		1	0.00111875	65.784	61.478	65.784	-1.6047	19100000	281	65.7837	NaN	1	NaN	NaN	65.784	NaN	NaN	NaN	NaN	NaN	NaN	NaN	NaN	NaN	NaN	NaN	NaN	NaN	NaN	NaN	NaN	NaN	NaN	NaN	NaN	NaN	NaN	NaN	NaN
O43390	18	O43390	O43390	Heterogeneous nuclear ribonucleoprotein R	HNRNPR	NQVNGNAVQLKEEEEPMDTSSVTHTEHYKTL	264	P	4	614		1	1.23872e-29	166.35	161.24	163.7	0.24275	4385100000	18	163.705	1	1	1	149.66	166.35	163.7	1	63.901	5.36633e-06	63.901	1	149.663	5.70488e-21	149.66	1	64.7792	7.70688e-11	89.086	NaN	NaN	NaN	NaN	1	94.8816	0.000235349	94.882	1	111.325	2.19681e-05
O43390	328	O43390	O43390	Heterogeneous nuclear ribonucleoprotein R	HNRNPR	KVKVWGNVVTVEWADPVEEPDPEVMAKVKVL	265	P	2	614		0.990717	0.006396	72.209	62.839	45.864	-1.44	251660000	328	21.7799	0.961198	0.809395	0.990717	42.375	72.209	60.918	NaN	NaN	NaN	NaN	0.961198	13.7606	0.0155189	42.375	NaN	NaN	NaN	NaN	NaN	NaN	NaN	NaN	NaN	NaN	NaN	NaN	NaN	NaN	NaN
O43390	332	O43390	O43390	Heterogeneous nuclear ribonucleoprotein R	HNRNPR	WGNVVTVEWADPVEEPDPEVMAKVKVLFVRN	266	P	3	614		0.961198	0.006396	72.209	62.839	42.375	-0.42237	251660000	332	13.7606	0.961198	0.809395	0.85426	42.375	72.209	44.304	NaN	NaN	NaN	NaN	0.961198	13.7606	0.0155189	42.375	NaN	NaN	NaN	NaN	NaN	NaN	NaN	NaN	NaN	NaN	NaN	NaN	NaN	NaN	NaN
O43390	150	O43390	O43390	Heterogeneous nuclear ribonucleoprotein R	HNRNPR	GYTLDVTTGQRKYGGPPPDSVYSGVQPGIGT	267	P	4	614		0.979378	0.00315041	45.941	33.975	45.941	-2.689	85746000	150	16.5948	NaN	0.979378	NaN	NaN	45.941	NaN	NaN	NaN	NaN	NaN	NaN	NaN	NaN	NaN	NaN	NaN	NaN	NaN	NaN	NaN	NaN	NaN	NaN	NaN	NaN	NaN	NaN	NaN	NaN
O43390	151	O43390	O43390	Heterogeneous nuclear ribonucleoprotein R	HNRNPR	YTLDVTTGQRKYGGPPPDSVYSGVQPGIGTE	268	P	4	614		0.979378	0.00315041	45.941	33.975	45.941	-2.689	85746000	151	16.5948	NaN	0.979378	NaN	NaN	45.941	NaN	NaN	NaN	NaN	NaN	NaN	NaN	NaN	NaN	NaN	NaN	NaN	NaN	NaN	NaN	NaN	NaN	NaN	NaN	NaN	NaN	NaN	NaN	NaN
O43390	152	O43390	O43390	Heterogeneous nuclear ribonucleoprotein R	HNRNPR	TLDVTTGQRKYGGPPPDSVYSGVQPGIGTEV	269	P	4	614		0.979378	0.00315041	45.941	33.975	45.941	-2.689	85746000	152	16.5948	NaN	0.979378	NaN	NaN	45.941	NaN	NaN	NaN	NaN	NaN	NaN	NaN	NaN	NaN	NaN	NaN	NaN	NaN	NaN	NaN	NaN	NaN	NaN	NaN	NaN	NaN	NaN	NaN	NaN
O43395	134	O43395	O43395	U4/U6 small nuclear ribonucleoprotein Prp3	PRPF3	VEEEPEVIPGPPSESPGMLTKLQIKQMMEAA	270	P	2	615		0.956704	0.0299189	72.433	62.152	72.433	-0.063074	6274000	134	15.9189	NaN	NaN	0.956704	NaN	NaN	72.433	NaN	NaN	NaN	NaN	NaN	NaN	NaN	NaN	NaN	NaN	NaN	NaN	NaN	NaN	NaN	NaN	NaN	NaN	NaN	NaN	NaN	NaN	NaN
O43395	221	O43395	O43395	U4/U6 small nuclear ribonucleoprotein Prp3	PRPF3	AAELQARIQAQLALKPGLIGNANMVGLANLH	271	P	4	615		0.99882	0.00183839	45.558	45.558	42.347	-1.6366	68298000	221	30.9647	0.99882	NaN	NaN	45.558	NaN	NaN	NaN	NaN	NaN	NaN	0.99882	30.9647	0.00330901	42.347	NaN	NaN	NaN	NaN	0.9129	13.1842	0.00183839	45.558	NaN	NaN	NaN	NaN	NaN	NaN	NaN
O43396	120	O43396	O43396	Thioredoxin-like protein 1	TXNL1	QHLENDPGSNEDTDIPKGYMDLMPFINKAGC	272	P	5	616	+	0.968017	3.2011e-05	71.085	71.085	71.085	-0.30695	234310000	120	15.0638	0.968017	0.865113	NaN	71.085	43.801	NaN	0	0	NaN	NaN	0.968017	15.0638	3.2011e-05	71.085	0.948222	13.153	0.0113049	44.264	NaN	NaN	NaN	NaN	NaN	NaN	NaN	NaN	NaN	NaN	NaN
O43491	984	O43491	O43491	Band 4.1-like protein 2	EPB41L2	DQALAQAIREAREQHPDMSVTRVVVHKETEL	273	P	5	632	+	1	3.04639e-05	58.398	43.915	49.199	-0.80151	132010000	984	49.1988	1	1	NaN	58.398	49.199	NaN	1	44.6164	0.00149849	44.616	NaN	NaN	NaN	NaN	NaN	NaN	NaN	NaN	1	58.3976	3.04639e-05	58.398	NaN	NaN	NaN	NaN	NaN	NaN	NaN
O43491	662	O43491	O43491	Band 4.1-like protein 2	EPB41L2	SISELKRNFMESTPEPRPNEWEKRRITPLSL	274	P	3	632		0.980485	1.13641e-05	103.43	93.921	59.261	0.40599	57944000	662	16.9235	0.980485	0.974823	NaN	59.261	103.43	NaN	0.980485	16.9235	0.011168	59.261	NaN	NaN	NaN	NaN	NaN	NaN	NaN	NaN	NaN	NaN	NaN	NaN	NaN	NaN	NaN	NaN	NaN	NaN	NaN
O43491	664	O43491	O43491	Band 4.1-like protein 2	EPB41L2	SELKRNFMESTPEPRPNEWEKRRITPLSLQT	275	P	3	632		0.980485	1.13641e-05	103.43	93.921	59.261	0.40599	57944000	664	16.9235	0.980485	0.974823	NaN	59.261	103.43	NaN	0.980485	16.9235	0.011168	59.261	NaN	NaN	NaN	NaN	NaN	NaN	NaN	NaN	NaN	NaN	NaN	NaN	NaN	NaN	NaN	NaN	NaN	NaN	NaN
O43513	188	O43513	O43513	Mediator of RNA polymerase II transcription subunit 7	MED7	DDLPHSEAGMRVKTEPMDADDSNNCTGQNEH	276	P	4	637		1	5.53785e-10	122.77	119.03	112.32	0.9219	155900000	188	112.322	1	1	1	122.77	98.703	112.32	NaN	NaN	NaN	NaN	NaN	NaN	NaN	NaN	NaN	NaN	NaN	NaN	1	122.766	5.53785e-10	122.77	NaN	NaN	NaN	NaN	NaN	NaN	NaN
O43524	515	O43524	O43524	Forkhead box protein O3	FOXO3	VSAQNSRRNVMLRNDPMMSFAAQPNQGSLVN	277	P	5	640		0.995738	3.04445e-07	74.397	74.397	74.397	0.1762	42118000	515	23.7524	0.995738	NaN	NaN	74.397	NaN	NaN	NaN	NaN	NaN	NaN	0.995738	23.7524	3.04445e-07	74.397	NaN	NaN	NaN	NaN	NaN	NaN	NaN	NaN	NaN	NaN	NaN	NaN	NaN	NaN	NaN
O43660	59	O43660	O43660	Pleiotropic regulator 1	PLRG1	MAIKLRNEYGPVLHMPTSKENLKEKGPQNAT	278	P	4	657		0.972604	0.02086	51.695	44.287	51.695	-0.21693	9030900	59	15.5025	0.972604	NaN	NaN	51.695	NaN	NaN	NaN	NaN	NaN	NaN	NaN	NaN	NaN	NaN	NaN	NaN	NaN	NaN	NaN	NaN	NaN	NaN	0.972604	15.5025	0.02086	51.695	NaN	NaN	NaN
O43660	143	O43660	O43660	Pleiotropic regulator 1	PLRG1	VALPLQTKADANRTAPSGSEYRHPGASDRPQ	279	P	5	657		0.457094	0.00236763	48.449	48.449	48.449	0.014093	0	143	0.489202	0.457094	NaN	NaN	48.449	NaN	NaN	NaN	NaN	NaN	NaN	0.457094	0.489202	0.00236763	48.449	NaN	NaN	NaN	NaN	NaN	NaN	NaN	NaN	NaN	NaN	NaN	NaN	NaN	NaN	NaN
O43660	151	O43660	O43660	Pleiotropic regulator 1	PLRG1	ADANRTAPSGSEYRHPGASDRPQPTAMNSIV	280	P	4	657		0.468875	4.50006e-05	80.174	75.459	80.174	-0.60715	0	151	0	0.323337	NaN	0.468875	40.129	NaN	80.174	NaN	NaN	NaN	NaN	NaN	NaN	NaN	NaN	0.323337	0	0.00703381	40.129	NaN	NaN	NaN	NaN	NaN	NaN	NaN	NaN	NaN	NaN	NaN
O43660	157	O43660	O43660	Pleiotropic regulator 1	PLRG1	APSGSEYRHPGASDRPQPTAMNSIVMETGNT	281	P	4	657		0.468875	4.50006e-05	80.174	75.459	80.174	-0.60715	0	157	0	0.323337	NaN	0.468875	40.129	NaN	80.174	NaN	NaN	NaN	NaN	NaN	NaN	NaN	NaN	0.323337	0	0.00703381	40.129	NaN	NaN	NaN	NaN	NaN	NaN	NaN	NaN	NaN	NaN	NaN
O43660	159	O43660	O43660	Pleiotropic regulator 1	PLRG1	SGSEYRHPGASDRPQPTAMNSIVMETGNTKN	282	P	4	657		0.323337	0.00703381	40.129	38.076	40.129	0.49616	0	159	0	0.323337	NaN	NaN	40.129	NaN	NaN	NaN	NaN	NaN	NaN	NaN	NaN	NaN	NaN	0.323337	0	0.00703381	40.129	NaN	NaN	NaN	NaN	NaN	NaN	NaN	NaN	NaN	NaN	NaN
O43660	501	O43660	O43660	Pleiotropic regulator 1	PLRG1	IKVYREDDTATEETHPVSWKPEIIKRKRF__	283	P	5	657	+	1	0.0201478	53.444	46.868	53.444	-1.2943	51032000	501	53.4444	NaN	1	NaN	NaN	53.444	NaN	NaN	NaN	NaN	NaN	NaN	NaN	NaN	NaN	NaN	NaN	NaN	NaN	NaN	NaN	NaN	NaN	NaN	NaN	NaN	NaN	NaN	NaN	NaN
O43660	506	O43660	O43660	Pleiotropic regulator 1	PLRG1	EDDTATEETHPVSWKPEIIKRKRF_______	284	P	5	657	+	1	0.0201478	53.444	46.868	53.444	-1.2943	51032000	506	53.4444	NaN	1	NaN	NaN	53.444	NaN	NaN	NaN	NaN	NaN	NaN	NaN	NaN	NaN	NaN	NaN	NaN	NaN	NaN	NaN	NaN	NaN	NaN	NaN	NaN	NaN	NaN	NaN	NaN
O43663	87	O43663	O43663	Protein regulator of cytokinesis 1	PRC1	CQKELNTLCSELHVEPFQEEGETTILQLEKD	285	P	3	658		1	0.00917189	45.957	42.196	45.957	-0.51665	8510000	87	45.9572	1	NaN	NaN	45.957	NaN	NaN	NaN	NaN	NaN	NaN	NaN	NaN	NaN	NaN	NaN	NaN	NaN	NaN	NaN	NaN	NaN	NaN	1	45.9572	0.00917189	45.957	NaN	NaN	NaN
O43670	86	O43670	O43670	BUB3-interacting and GLEBS motif-containing protein ZNF207	ZNF207	GRTDIELEIYGMEGIPEKDMDERRRLLEQKT	286	P	3	660		1	6.13864e-07	100.21	89.52	100.21	-1.6924	470710000	86	100.209	1	1	1	90.972	93.269	100.21	NaN	NaN	NaN	NaN	1	53.5846	6.13864e-07	64.984	1	90.9723	5.58812e-05	90.972	NaN	NaN	NaN	NaN	NaN	NaN	NaN	NaN	NaN	NaN	NaN
O43674	167	O43674	O43674	NADH dehydrogenase [ubiquinone] 1 beta subcomplex subunit 5, mitochondrial	NDUFB5	KELEVRKLMHVRGDGPWYYYETIDKELIDHS	287	P	5	661		1	5.76163e-05	82.849	80.968	82.849	-0.00073641	489190000	167	80.7661	1	1	0.999923	72.145	82.849	47.099	NaN	NaN	NaN	NaN	1	71.2135	0.00533402	72.145	0.99967	34.82	0.00996979	41.047	NaN	NaN	NaN	NaN	NaN	NaN	NaN	NaN	NaN	NaN	NaN
O43681	140	O43681	O43681	ATPase ASNA1	ASNA1	LSMGKKMMQEAMSAFPGIDEAMSYAEVMRLV	288	P	3	665		1	0.000229887	57.147	56.96	57.147	0.39996	18313000	140	57.1466	NaN	NaN	1	NaN	NaN	57.147	NaN	NaN	NaN	NaN	NaN	NaN	NaN	NaN	NaN	NaN	NaN	NaN	NaN	NaN	NaN	NaN	NaN	NaN	NaN	NaN	NaN	NaN	NaN
O43681	115	O43681	O43681	ATPase ASNA1	ASNA1	LFAMEIDPSLGVAELPDEFFEEDNMLSMGKK	289	P	4	665		0.999738	2.03e-06	59.18	59.18	59.18	-0.85212	122430000	115	36.1111	0.951993	0.999738	NaN	42.863	59.18	NaN	0.951993	13.777	0.00186442	42.863	NaN	NaN	NaN	NaN	NaN	NaN	NaN	NaN	NaN	NaN	NaN	NaN	NaN	NaN	NaN	NaN	NaN	NaN	NaN
O43683	348	O43683	O43683	Mitotic checkpoint serine/threonine-protein kinase BUB1	BUB1	QELRAPCLPVTYQQTPVNMEKNPREAPPVVP	290	P	4	666		0.868304	0.000939912	49.968	40.746	47.757	0.87585	48408000	348	11.0588	NaN	0.507665	0.868304	NaN	49.968	47.757	NaN	NaN	NaN	NaN	NaN	NaN	NaN	NaN	NaN	NaN	NaN	NaN	NaN	NaN	NaN	NaN	NaN	NaN	NaN	NaN	NaN	NaN	NaN
O43707	616	O43707	O43707	Alpha-actinin-4	ACTN4	NHIKLSGSNPYTTVTPQIINSKWEKVQQLVP	291	P	2	668		1	0.000869881	94.507	71.389	94.507	-3.0902	0	616	79.9976	NaN	NaN	1	NaN	NaN	94.507	NaN	NaN	NaN	NaN	NaN	NaN	NaN	NaN	NaN	NaN	NaN	NaN	NaN	NaN	NaN	NaN	NaN	NaN	NaN	NaN	NaN	NaN	NaN
O43707	252	O43707	O43707	Alpha-actinin-4	ACTN4	IPKMLDAEDIVNTARPDEKAIMTYVSSFYHA	292	P	4	668		1	0.000580207	49.001	43.416	49.001	-2.9346	46261000	252	49.0013	NaN	NaN	1	NaN	NaN	49.001	NaN	NaN	NaN	NaN	NaN	NaN	NaN	NaN	NaN	NaN	NaN	NaN	NaN	NaN	NaN	NaN	NaN	NaN	NaN	NaN	NaN	NaN	NaN
O43716	77	O43716	O43716	Glutamyl-tRNA(Gln) amidotransferase subunit C, mitochondrial	GATC	AFADRLRAVDTDGVEPMESVLEDRCLYLRSD	293	P	3	672		1	2.13081e-24	200.82	183.87	62.362	-0.23936	288020000	77	62.3624	1	1	1	65.25	200.82	169.23	1	65.2497	0.0231731	65.25	1	62.3624	0.0301871	62.362	0	0	NaN	NaN	NaN	NaN	NaN	NaN	NaN	NaN	NaN	NaN	NaN	NaN	NaN
O43747	233	O43747	O43747	AP-1 complex subunit gamma-1	AP1G1	QLVRILKNLIMSGYSPEHDVSGISDPFLQVR	294	P	4	677		1	7.6692e-05	98.299	91.554	88.571	-0.202	225380000	233	70.9206	1	0.999954	1	98.299	92.275	88.571	NaN	NaN	NaN	NaN	NaN	NaN	NaN	NaN	NaN	NaN	NaN	NaN	1	69.3479	0.000187892	98.299	NaN	NaN	NaN	NaN	NaN	NaN	NaN
O43768	83	O43768	O43768	Alpha-endosulfine	ENSA	GDYNMAKAKMKNKQLPSAGPDKNLVTGDHIP	295	P	5	684		0.877365	0.027701	45.862	30.343	45.862	0.85188	51978000	83	8.18893	NaN	NaN	0.877365	NaN	NaN	45.862	NaN	NaN	NaN	NaN	NaN	NaN	NaN	NaN	NaN	NaN	NaN	NaN	NaN	NaN	NaN	NaN	NaN	NaN	NaN	NaN	NaN	NaN	NaN
O43768	87	O43768	O43768	Alpha-endosulfine	ENSA	MAKAKMKNKQLPSAGPDKNLVTGDHIPTPQD	296	P	5	684		0.877109	0.027701	45.862	30.343	45.862	0.85188	51978000	87	8.18893	NaN	NaN	0.877109	NaN	NaN	45.862	NaN	NaN	NaN	NaN	NaN	NaN	NaN	NaN	NaN	NaN	NaN	NaN	NaN	NaN	NaN	NaN	NaN	NaN	NaN	NaN	NaN	NaN	NaN
O43776	467	O43776	O43776	Asparagine--tRNA ligase, cytoplasmic	NARS	CPEDSRLTESVDVLMPNVGEIVGGSMRIFDS	297	P	2	686		1	1.47321e-10	143.93	124.73	143.93	-0.73641	30615000	467	143.925	1	NaN	NaN	143.93	NaN	NaN	NaN	NaN	NaN	NaN	NaN	NaN	NaN	NaN	1	143.925	1.47321e-10	143.93	NaN	NaN	NaN	NaN	NaN	NaN	NaN	NaN	NaN	NaN	NaN
O43776	512	O43776	O43776	Asparagine--tRNA ligase, cytoplasmic	NARS	TPYYWYTDQRKYGTCPHGGYGLGLERFLTWI	298	P	3	686		1	0.0304705	52.522	49.235	52.522	-0.5091	28743000	512	52.5225	1	NaN	NaN	52.522	NaN	NaN	NaN	NaN	NaN	NaN	NaN	NaN	NaN	NaN	1	52.5225	0.0304705	52.522	NaN	NaN	NaN	NaN	NaN	NaN	NaN	NaN	NaN	NaN	NaN
O43815	627	O43815	O43815	Striatin	STRN	KELGIPASVDLVSSDPSHMVASFSKGYTSIF	299	P	3	693		0.999881	0.000700177	67.194	49.825	67.194	-1.4084	120710000	627	39.2486	0.999355	0.998861	0.999881	51.001	47.728	67.194	0.999355	31.9029	0.00526317	51.001	NaN	NaN	NaN	NaN	NaN	NaN	NaN	NaN	NaN	NaN	NaN	NaN	NaN	NaN	NaN	NaN	NaN	NaN	NaN
O43823	73	O43823	O43823	A-kinase anchor protein 8	AKAP8	WEAAKANDGGLAAGAPAMHMASYGPEPCTDN	300	P	3	697		0.75648	8.68531e-05	51.976	51.976	43.931	0.10462	57012000	73	6.3284	NaN	0.75648	NaN	NaN	51.976	NaN	NaN	NaN	NaN	NaN	NaN	NaN	NaN	NaN	NaN	NaN	NaN	NaN	NaN	NaN	NaN	NaN	NaN	NaN	NaN	NaN	NaN	NaN	NaN
O43824	406	O43824	O43824	Putative GTP-binding protein 6	GTPBP6	LQKCSVLSTLRGLQLPAPLLDSMVEVHNKVD	301	P	4	698		0.513879	3.02597e-07	58.421	54.5	49.585	-1.2551	486850000	406	0.437415	0.513879	0	0.489809	49.585	NaN	58.421	NaN	NaN	NaN	NaN	0.513879	0.437415	3.85263e-05	49.585	0.511575	0.414497	0.0025571	43.686	NaN	NaN	NaN	NaN	NaN	NaN	NaN	NaN	NaN	NaN	NaN
O43824	408	O43824	O43824	Putative GTP-binding protein 6	GTPBP6	KCSVLSTLRGLQLPAPLLDSMVEVHNKVDLV	302	P	3	698		0.991615	9.67501e-10	82.384	76.939	82.384	0.26476	2301700000	408	20.7768	0.655868	0.991615	0.925986	48.909	82.384	72.491	0.655868	5.86792	6.10322e-05	48.909	NaN	NaN	NaN	NaN	NaN	NaN	NaN	NaN	NaN	NaN	NaN	NaN	NaN	NaN	NaN	NaN	NaN	NaN	NaN
O43837	118	O43837	O43837	Isocitrate dehydrogenase [NAD] subunit beta, mitochondrial	IDH3B	SMKENKVAIIGKIHTPMEYKGELASYDMRLR	303	P	5	701		1	0.00144668	79.393	76.055	46.131	0.23476	146280000	118	46.1314	NaN	NaN	1	NaN	NaN	79.393	NaN	NaN	NaN	NaN	NaN	NaN	NaN	NaN	NaN	NaN	NaN	NaN	NaN	NaN	NaN	NaN	NaN	NaN	NaN	NaN	NaN	NaN	NaN
O43837	322	O43837	O43837	Isocitrate dehydrogenase [NAD] subunit beta, mitochondrial	IDH3B	ARHPFAQAVGRNIANPTAMLLSASNMLRHLN	304	P	2	701		1	0.00657442	73.466	58.78	73.466	-0.016888	23658000	322	73.4663	NaN	1	NaN	NaN	73.466	NaN	NaN	NaN	NaN	NaN	NaN	NaN	NaN	NaN	NaN	NaN	NaN	NaN	NaN	NaN	NaN	NaN	NaN	NaN	NaN	NaN	NaN	NaN	NaN
O43837	50	O43837	O43837	Isocitrate dehydrogenase [NAD] subunit beta, mitochondrial	IDH3B	ASRSQAEDVRVEGSFPVTMLPGDGVGPELMH	305	P	5	701		0.993908	6.76666e-06	88.241	82.37	88.241	-0.69056	187750000	50	22.1414	NaN	NaN	0.993908	NaN	NaN	88.241	NaN	NaN	NaN	NaN	NaN	NaN	NaN	NaN	NaN	NaN	NaN	NaN	NaN	NaN	NaN	NaN	NaN	NaN	NaN	NaN	NaN	NaN	NaN
O43837	61	O43837	O43837	Isocitrate dehydrogenase [NAD] subunit beta, mitochondrial	IDH3B	EGSFPVTMLPGDGVGPELMHAVKEVFKAAAV	306	P	4	701		0.999124	2.58927e-07	67.871	67.871	52.97	-0.39578	508100000	61	30.2748	0.970317	0.930414	0.999124	67.871	44.641	67.015	NaN	NaN	NaN	NaN	0.970317	15.1496	2.58927e-07	67.871	NaN	NaN	NaN	NaN	NaN	NaN	NaN	NaN	NaN	NaN	NaN	NaN	NaN	NaN	NaN
O43847	297	O43847	O43847	Nardilysin	NRD1	YFKEALDRWAQFFIHPLMIRDAIDREVEAVD	307	P	4	702		1	0.00016619	96.993	84.865	68.173	-0.15832	717370000	297	68.1732	1	1	1	68.173	96.993	58.83	NaN	NaN	NaN	NaN	NaN	NaN	NaN	NaN	NaN	NaN	NaN	NaN	1	68.1732	0.00219922	68.173	NaN	NaN	NaN	NaN	NaN	NaN	NaN
O43847	339	O43847	O43847	Nardilysin	NRD1	NRKEMLFGSLARPGHPMGKFFWGNAETLKHE	308	P	2	702		0.984402	0.00240896	103.88	103.88	90.653	-0.50901	2070900000	339	18.001	0.895555	0.984402	0.983294	50.874	103.88	88.187	NaN	NaN	NaN	NaN	NaN	NaN	NaN	NaN	0.895555	9.33269	0.0340051	50.874	NaN	NaN	NaN	NaN	NaN	NaN	NaN	NaN	NaN	NaN	NaN
O43865	4	O43865	O43865	Putative adenosylhomocysteinase 2	AHCYL1	____________MSMPDAMPLPGVGEELKQA	309	P	3	706	+	0.832453	0.00672673	60.062	60.062	60.062	-0.41015	131190000	4	7.2486	0.832453	NaN	NaN	60.062	NaN	NaN	NaN	NaN	NaN	NaN	0.832453	7.2486	0.00672673	60.062	NaN	NaN	NaN	NaN	NaN	NaN	NaN	NaN	NaN	NaN	NaN	NaN	NaN	NaN	NaN
O60216	448	O60216	O60216	Double-strand-break repair protein rad21 homolog	RAD21	QHQQRDVIDEPIIEEPSRLQESVMEASRTNI	310	P	3	714		0.99999	9.80948e-08	112.37	100.29	112.37	-0.8602	625540000	448	50.0932	0.999781	NaN	0.99999	79.783	NaN	112.37	0.999781	36.5847	0.000742816	79.783	0.998387	27.9179	0.0174368	59.539	0.999512	33.1134	0.000906949	78.067	NaN	NaN	NaN	NaN	NaN	NaN	NaN	NaN	NaN	NaN	NaN
O60231	822	O60231	O60231	Putative pre-mRNA-splicing factor ATP-dependent RNA helicase DHX16	DHX16	ELTTSGRKMAELPVDPMLSKMILASEKYSCS	311	P	2	716		0.99732	0.00903784	88.576	88.576	88.576	1.5703	18354000	822	25.707	NaN	0.99732	NaN	NaN	88.576	NaN	NaN	NaN	NaN	NaN	NaN	NaN	NaN	NaN	NaN	NaN	NaN	NaN	NaN	NaN	NaN	NaN	NaN	NaN	NaN	NaN	NaN	NaN	NaN
O60232	144	O60232	O60232	Sjoegren syndrome/scleroderma autoantigen 1	SSSCA1	AAGLKAAQGPPAPAVPPNTDVMACTQTALLQ	312	P	3	717		0.49763	0.0054505	48.759	42.255	40.756	0.103	0	144	0	0.49763	NaN	NaN	48.759	NaN	NaN	NaN	NaN	NaN	NaN	NaN	NaN	NaN	NaN	NaN	NaN	NaN	NaN	0.49763	0	0.0054505	48.759	NaN	NaN	NaN	NaN	NaN	NaN	NaN
O60232	145	O60232	O60232	Sjoegren syndrome/scleroderma autoantigen 1	SSSCA1	AGLKAAQGPPAPAVPPNTDVMACTQTALLQK	313	P	3	717		0.855027	0.000420835	68.231	53.103	68.231	-0.59129	28358000	145	7.70978	0.855027	NaN	NaN	68.231	NaN	NaN	NaN	NaN	NaN	NaN	NaN	NaN	NaN	NaN	NaN	NaN	NaN	NaN	0.49763	0	0.0054505	48.759	0.855027	7.70978	0.000420835	68.231	NaN	NaN	NaN
O60232	15	O60232	O60232	Sjoegren syndrome/scleroderma autoantigen 1	SSSCA1	_MALNGAEVDDFSWEPPTEAETKVLQARRER	314	P	2	717		0.756108	0.000450761	59.864	50.577	59.864	-4.3045	7627700	15	4.91385	NaN	NaN	0.756108	NaN	NaN	59.864	NaN	NaN	NaN	NaN	NaN	NaN	NaN	NaN	NaN	NaN	NaN	NaN	NaN	NaN	NaN	NaN	NaN	NaN	NaN	NaN	NaN	NaN	NaN
O60232	120	O60232	O60232	Sjoegren syndrome/scleroderma autoantigen 1	SSSCA1	SELPLGSRPAPQPPVPRPEHCEGAAAGLKAA	315	P	5	717		0.296066	0.000591413	42.571	37.515	42.571	0.33651	0	120	0	0.296066	NaN	NaN	42.571	NaN	NaN	NaN	NaN	NaN	NaN	NaN	NaN	NaN	NaN	NaN	NaN	NaN	NaN	0.296066	0	0.000591413	42.571	NaN	NaN	NaN	NaN	NaN	NaN	NaN
O60232	122	O60232	O60232	Sjoegren syndrome/scleroderma autoantigen 1	SSSCA1	LPLGSRPAPQPPVPRPEHCEGAAAGLKAAQG	316	P	5	717		0.296066	0.000591413	42.571	37.515	42.571	0.33651	0	122	0	0.296066	NaN	NaN	42.571	NaN	NaN	NaN	NaN	NaN	NaN	NaN	NaN	NaN	NaN	NaN	NaN	NaN	NaN	0.296066	0	0.000591413	42.571	NaN	NaN	NaN	NaN	NaN	NaN	NaN
O60244	1155	O60244	O60244	Mediator of RNA polymerase II transcription subunit 14	MED14	DASHSPRAGTSSQTMPTNMPPPRKLPQRSWA	317	P	2	722		0.995304	1.83154e-05	138.63	115.71	138.63	0.046181	0	1155	23.3398	0.995304	NaN	NaN	138.63	NaN	NaN	NaN	NaN	NaN	NaN	0.995304	23.3398	1.83154e-05	138.63	NaN	NaN	NaN	NaN	NaN	NaN	NaN	NaN	NaN	NaN	NaN	NaN	NaN	NaN	NaN
O60244	1237	O60244	O60244	Mediator of RNA polymerase II transcription subunit 14	MED14	RIIQQETLQLINSNEPGVIMFKTDALKCRVA	318	P	4	722		1	0.00653149	46.862	41.26	46.862	0.057364	35629000	1237	46.8619	NaN	NaN	1	NaN	NaN	46.862	NaN	NaN	NaN	NaN	NaN	NaN	NaN	NaN	NaN	NaN	NaN	NaN	NaN	NaN	NaN	NaN	NaN	NaN	NaN	NaN	NaN	NaN	NaN
O60256	244	O60256	O60256	Phosphoribosyl pyrophosphate synthase-associated protein 2	PRPSAP2	PMVRSVAAIHPSLEIPMLIPKEKPPITVVGD	319	P	2	724		0.999436	0.0143698	98.803	93.196	98.803	0.12031	54565000	244	35.1113	NaN	0.999436	NaN	NaN	98.803	NaN	NaN	NaN	NaN	NaN	NaN	NaN	NaN	NaN	NaN	NaN	NaN	NaN	NaN	NaN	NaN	NaN	NaN	NaN	NaN	NaN	NaN	NaN	NaN
O60264	468	O60264	O60264	SWI/SNF-related matrix-associated actin-dependent regulator of chromatin subfamily A member 5	SMARCA5	LRKCCNHPYLFDGAEPGPPYTTDMHLVTNSG	320	P	4	726		0.415461	0.00555822	42.973	38.212	42.973	1.2404	0	468	1.23901	0	0.415461	NaN	NaN	42.973	NaN	NaN	NaN	NaN	NaN	NaN	NaN	NaN	NaN	NaN	NaN	NaN	NaN	0	0	NaN	NaN	NaN	NaN	NaN	NaN	NaN	NaN	NaN
O60264	470	O60264	O60264	SWI/SNF-related matrix-associated actin-dependent regulator of chromatin subfamily A member 5	SMARCA5	KCCNHPYLFDGAEPGPPYTTDMHLVTNSGKM	321	P	4	726		0.548311	8.6873e-05	87.489	85.607	87.489	-1.2317	50551000	470	1.00937	0.548311	NaN	NaN	87.489	NaN	NaN	NaN	NaN	NaN	NaN	NaN	NaN	NaN	NaN	NaN	NaN	NaN	NaN	0.548311	1.00937	8.6873e-05	87.489	NaN	NaN	NaN	NaN	NaN	NaN	NaN
O60264	733	O60264	O60264	SWI/SNF-related matrix-associated actin-dependent regulator of chromatin subfamily A member 5	SMARCA5	DYREKQKIAFTEWIEPPKRERKANYAVDAYF	322	P	3	726		1	0.0093026	75.819	60.275	75.819	0.16719	140500000	733	75.8194	1	NaN	NaN	75.819	NaN	NaN	NaN	NaN	NaN	NaN	NaN	NaN	NaN	NaN	1	75.8194	0.0093026	75.819	NaN	NaN	NaN	NaN	NaN	NaN	NaN	NaN	NaN	NaN	NaN
O60264	734	O60264	O60264	SWI/SNF-related matrix-associated actin-dependent regulator of chromatin subfamily A member 5	SMARCA5	YREKQKIAFTEWIEPPKRERKANYAVDAYFR	323	P	3	726		1	0.0093026	75.819	60.275	75.819	0.16719	140500000	734	75.8194	1	NaN	NaN	75.819	NaN	NaN	NaN	NaN	NaN	NaN	NaN	NaN	NaN	NaN	1	75.8194	0.0093026	75.819	NaN	NaN	NaN	NaN	NaN	NaN	NaN	NaN	NaN	NaN	NaN
O60271	349	O60271	O60271	C-Jun-amino-terminal kinase-interacting protein 4	SPAG9	ENEEKSEVQAIIESTPELDMDKDLSGYKGSS	324	P	4	729		1	0.00302028	48.085	43.81	48.085	-0.0088918	17418000	349	48.0847	NaN	NaN	1	NaN	NaN	48.085	NaN	NaN	NaN	NaN	NaN	NaN	NaN	NaN	NaN	NaN	NaN	NaN	NaN	NaN	NaN	NaN	NaN	NaN	NaN	NaN	NaN	NaN	NaN
O60287	1113	O60287	O60287	Nucleolar pre-ribosomal-associated protein 1	URB1	PPKTPPQLEALQELHPYMEGAQLREVTLALL	325	P	3	733		0.99994	0.000626249	71.148	63.117	71.148	0.27918	156080000	1113	42.2565	0.997608	0.99994	NaN	53.342	71.148	NaN	0.996398	24.4505	0.0076433	53.342	0.997608	26.6922	0.0457597	43.198	NaN	NaN	NaN	NaN	NaN	NaN	NaN	NaN	NaN	NaN	NaN	NaN	NaN	NaN	NaN
O60293	1140	O60293	O60293	Zinc finger C3H1 domain-containing protein	ZFC3H1	DVDFVTAQSKTMEVKPCPFRPYHSPLLVFKS	326	P	5	736		0.390909	0.000779976	69.737	62.544	69.737	-0.065881	0	1140	1.08429	NaN	0.390909	NaN	NaN	69.737	NaN	NaN	NaN	NaN	NaN	NaN	NaN	NaN	NaN	NaN	NaN	NaN	NaN	NaN	NaN	NaN	NaN	NaN	NaN	NaN	NaN	NaN	NaN	NaN
O60293	1142	O60293	O60293	Zinc finger C3H1 domain-containing protein	ZFC3H1	DFVTAQSKTMEVKPCPFRPYHSPLLVFKSYR	327	P	5	736		0.350551	0.0167082	47.397	40.748	47.397	0.041329	0	1142	0	NaN	0.350551	NaN	NaN	47.397	NaN	NaN	NaN	NaN	NaN	NaN	NaN	NaN	NaN	NaN	NaN	NaN	NaN	NaN	NaN	NaN	NaN	NaN	NaN	NaN	NaN	NaN	NaN	NaN
O60293	1145	O60293	O60293	Zinc finger C3H1 domain-containing protein	ZFC3H1	TAQSKTMEVKPCPFRPYHSPLLVFKSYRFSP	328	P	5	736		0.350551	0.0167082	47.397	40.748	47.397	0.041329	0	1145	0	NaN	0.350551	NaN	NaN	47.397	NaN	NaN	NaN	NaN	NaN	NaN	NaN	NaN	NaN	NaN	NaN	NaN	NaN	NaN	NaN	NaN	NaN	NaN	NaN	NaN	NaN	NaN	NaN	NaN
O60306	7	O60306	O60306	Intron-binding protein aquarius	AQR	_________MAAPAQPKKIVAPTVSQINAEF	329	P	1	741		0.99791	0.0358193	42.229	10.939	42.229	0.82357	32603000	7	26.7895	0.99791	NaN	NaN	42.229	NaN	NaN	0.99791	26.7895	0.0358193	42.229	NaN	NaN	NaN	NaN	NaN	NaN	NaN	NaN	NaN	NaN	NaN	NaN	NaN	NaN	NaN	NaN	NaN	NaN	NaN
O60306	525	O60306	O60306	Intron-binding protein aquarius	AQR	MAQPIVAFTVVEVAKPNIGENWPTRVRADVT	330	P	3	741		1	0.000266213	73.981	67.257	73.981	0.10032	78189000	525	67.5472	1	NaN	NaN	73.981	NaN	NaN	1	67.5472	0.000266213	73.981	NaN	NaN	NaN	NaN	NaN	NaN	NaN	NaN	NaN	NaN	NaN	NaN	NaN	NaN	NaN	NaN	NaN	NaN	NaN
O60306	532	O60306	O60306	Intron-binding protein aquarius	AQR	FTVVEVAKPNIGENWPTRVRADVTINLNVRD	331	P	3	741		1	0.000266213	73.981	67.257	73.981	0.10032	78189000	532	67.6856	1	NaN	NaN	73.981	NaN	NaN	1	67.6856	0.000266213	73.981	NaN	NaN	NaN	NaN	NaN	NaN	NaN	NaN	NaN	NaN	NaN	NaN	NaN	NaN	NaN	NaN	NaN	NaN	NaN
O60306	494	O60306	O60306	Intron-binding protein aquarius	AQR	YEIRQDIEDSVSRMKPWQSEYGGVVFGGWAR	332	P	3	741		1	0.0156948	71.601	63	71.601	-0.93388	75582000	494	71.6009	1	NaN	NaN	71.601	NaN	NaN	NaN	NaN	NaN	NaN	1	71.6009	0.0156948	71.601	NaN	NaN	NaN	NaN	NaN	NaN	NaN	NaN	NaN	NaN	NaN	NaN	NaN	NaN	NaN
O60315	4	O60315	O60315	Zinc finger E-box-binding homeobox 2	ZEB2	____________MKQPIMADGPRCKRRKQAN	333	P	2	745		1	0.0228996	40.352	9.7815	40.352	-1.5894	14774000	4	40.3516	NaN	1	NaN	NaN	40.352	NaN	NaN	NaN	NaN	NaN	NaN	NaN	NaN	NaN	NaN	NaN	NaN	NaN	NaN	NaN	NaN	NaN	NaN	NaN	NaN	NaN	NaN	NaN	NaN
O60315	10	O60315	O60315	Zinc finger E-box-binding homeobox 2	ZEB2	______MKQPIMADGPRCKRRKQANPRRKNV	334	P	2	745		1	0.0228996	40.352	9.7815	40.352	-1.5894	14774000	10	40.3516	NaN	1	NaN	NaN	40.352	NaN	NaN	NaN	NaN	NaN	NaN	NaN	NaN	NaN	NaN	NaN	NaN	NaN	NaN	NaN	NaN	NaN	NaN	NaN	NaN	NaN	NaN	NaN	NaN
O60341	105	O60341	O60341	Lysine-specific histone demethylase 1A	KDM1A	VPGSATPMETGIAETPEGRRTSRRKRAKVEY	335	P	4	750		0.842767	5.84223e-05	48.08	40.543	48.08	0.66749	159630000	105	8.10036	NaN	NaN	0.842767	NaN	NaN	48.08	NaN	NaN	NaN	NaN	NaN	NaN	NaN	NaN	NaN	NaN	NaN	NaN	NaN	NaN	NaN	NaN	NaN	NaN	NaN	NaN	NaN	NaN	NaN
O60341	341	O60341	O60341	Lysine-specific histone demethylase 1A	KDM1A	VADLGAMVVTGLGGNPMAVVSKQVNMELAKI	336	P	3	750		1	2.0205e-05	105.17	98.522	84.948	-0.45886	1668200000	341	84.9478	1	1	1	95.652	105.17	100.93	NaN	NaN	NaN	NaN	1	69.9519	5.3065e-05	95.652	NaN	NaN	NaN	NaN	NaN	NaN	NaN	NaN	NaN	NaN	NaN	NaN	NaN	NaN	NaN
O60341	152	O60341	O60341	Lysine-specific histone demethylase 1A	KDM1A	SEEERNAKAEKEKKLPPPPPQAPPEEENESE	337	P	3	750		0.698501	0.00501276	43.24	41.713	43.24	-1.0677	51582000	152	0.336046	0.698501	NaN	0.678031	43.24	NaN	42.571	NaN	NaN	NaN	NaN	NaN	NaN	NaN	NaN	0.698501	0.336046	0.00501276	43.24	0.666327	0.27773	0.005928	42.302	NaN	NaN	NaN	NaN	NaN	NaN	NaN
O60341	153	O60341	O60341	Lysine-specific histone demethylase 1A	KDM1A	EEERNAKAEKEKKLPPPPPQAPPEEENESEP	338	P	3	750		0.680387	0.00501276	43.24	41.713	43.24	-1.0677	51582000	153	0	0.680387	NaN	0.659621	43.24	NaN	42.571	NaN	NaN	NaN	NaN	NaN	NaN	NaN	NaN	0.680387	0	0.00501276	43.24	0.651194	0	0.005928	42.302	NaN	NaN	NaN	NaN	NaN	NaN	NaN
O60341	154	O60341	O60341	Lysine-specific histone demethylase 1A	KDM1A	EERNAKAEKEKKLPPPPPQAPPEEENESEPE	339	P	3	750		0.676257	0.00501276	43.24	41.713	43.24	-1.0677	51582000	154	0	0.676257	NaN	0.654849	43.24	NaN	42.571	NaN	NaN	NaN	NaN	NaN	NaN	NaN	NaN	0.676257	0	0.00501276	43.24	0.660888	0	0.005928	42.302	NaN	NaN	NaN	NaN	NaN	NaN	NaN
O60341	155	O60341	O60341	Lysine-specific histone demethylase 1A	KDM1A	ERNAKAEKEKKLPPPPPQAPPEEENESEPEE	340	P	3	750		0.675824	0.00501276	43.24	41.713	43.24	-1.0677	51582000	155	0	0.675824	NaN	0.654184	43.24	NaN	42.571	NaN	NaN	NaN	NaN	NaN	NaN	NaN	NaN	0.675824	0	0.00501276	43.24	0.660023	0	0.005928	42.302	NaN	NaN	NaN	NaN	NaN	NaN	NaN
O60341	156	O60341	O60341	Lysine-specific histone demethylase 1A	KDM1A	RNAKAEKEKKLPPPPPQAPPEEENESEPEEP	341	P	3	750		0.675824	0.00501276	43.24	41.713	43.24	-1.0677	51582000	156	0	0.675824	NaN	0.654184	43.24	NaN	42.571	NaN	NaN	NaN	NaN	NaN	NaN	NaN	NaN	0.675824	0	0.00501276	43.24	0.662106	0	0.005928	42.302	NaN	NaN	NaN	NaN	NaN	NaN	NaN
O60341	159	O60341	O60341	Lysine-specific histone demethylase 1A	KDM1A	KAEKEKKLPPPPPQAPPEEENESEPEEPSGV	342	P	3	750		0.675824	0.00501276	43.24	41.713	43.24	-1.0677	51582000	159	0	0.675824	NaN	0.654184	43.24	NaN	42.571	NaN	NaN	NaN	NaN	NaN	NaN	NaN	NaN	0.675824	0	0.00501276	43.24	0.662106	0	0.005928	42.302	NaN	NaN	NaN	NaN	NaN	NaN	NaN
O60341	160	O60341	O60341	Lysine-specific histone demethylase 1A	KDM1A	AEKEKKLPPPPPQAPPEEENESEPEEPSGVE	343	P	3	750		0.675824	0.00501276	43.24	41.713	43.24	-1.0677	51582000	160	0	0.675824	NaN	0.654184	43.24	NaN	42.571	NaN	NaN	NaN	NaN	NaN	NaN	NaN	NaN	0.675824	0	0.00501276	43.24	0.662106	0	0.005928	42.302	NaN	NaN	NaN	NaN	NaN	NaN	NaN
O60343	53	O60343	O60343	TBC1 domain family member 4	TBC1D4	LWYVGGSCLDHRTTLPMLPWLMAEIRRRSQK	344	P	2	751		0.996136	0.00236473	97.911	97.911	97.911	-0.12228	40191000	53	24.2796	NaN	NaN	0.996136	NaN	NaN	97.911	NaN	NaN	NaN	NaN	NaN	NaN	NaN	NaN	NaN	NaN	NaN	NaN	NaN	NaN	NaN	NaN	NaN	NaN	NaN	NaN	NaN	NaN	NaN
O60361;P15531;P22392	81;96;96	O60361;P15531;P22392	P22392	Putative nucleoside diphosphate kinase;Nucleoside diphosphate kinase A;Nucleoside diphosphate kinase B	NME2P1;NME1;NME2	LNVVKTGRVMLGETNPADSKPGTIRGDFCIQ	345	P	3	1742;1937;755		1	0.0175805	56.95	38.069	56.95	-0.35288	21618000	96	56.9498	NaN	1	NaN	NaN	56.95	NaN	NaN	NaN	NaN	NaN	NaN	NaN	NaN	NaN	NaN	NaN	NaN	NaN	NaN	NaN	NaN	NaN	NaN	NaN	NaN	NaN	NaN	NaN	NaN
O60361;P15531;P22392	86;101;101	O60361;P15531;P22392	P22392	Putative nucleoside diphosphate kinase;Nucleoside diphosphate kinase A;Nucleoside diphosphate kinase B	NME2P1;NME1;NME2	TGRVMLGETNPADSKPGTIRGDFCIQVGRNI	346	P	3	1742;1937;755		1	0.0175805	56.95	38.069	56.95	-0.35288	21618000	101	56.9498	NaN	1	NaN	NaN	56.95	NaN	NaN	NaN	NaN	NaN	NaN	NaN	NaN	NaN	NaN	NaN	NaN	NaN	NaN	NaN	NaN	NaN	NaN	NaN	NaN	NaN	NaN	NaN	NaN
O60361;P22392	57;72	O60361;P22392	P22392	Putative nucleoside diphosphate kinase;Nucleoside diphosphate kinase B	NME2P1;NME2	DRPFFPGLVKYMNSGPVVAMVWEGLNVVKTG	347	P	3	1937;755		1	0.00209829	70.944	67.34	44.342	-0.36163	404850000	72	44.3418	1	1	1	70.944	57.267	56.936	NaN	NaN	NaN	NaN	1	70.9438	0.00209829	70.944	1	43.1198	0.0434862	43.12	NaN	NaN	NaN	NaN	NaN	NaN	NaN	NaN	NaN	NaN	NaN
O60427	389	O60427	O60427	Fatty acid desaturase 1	FADS1	WFSGHLNFQIEHHLFPTMPRHNYHKVAPLVQ	348	P	5	757	+	0.566842	1.96045e-05	100.88	87.95	100.88	0.41619	73809000	389	1.16815	0.549581	0.566842	NaN	86.236	100.88	NaN	NaN	NaN	NaN	NaN	NaN	NaN	NaN	NaN	0.549581	0.864155	1.96045e-05	86.236	NaN	NaN	NaN	NaN	NaN	NaN	NaN	NaN	NaN	NaN	NaN
O60488	643	O60488	O60488	Long-chain-fatty-acid--CoA ligase 4	ACSL4	QQKGVEGTWVDICNNPAMEAEILKEIREAAN	349	P	3	763		1	0.0011378	77.689	70.413	77.689	2.3108	16989000	643	77.689	NaN	1	NaN	NaN	77.689	NaN	NaN	NaN	NaN	NaN	NaN	NaN	NaN	NaN	NaN	NaN	NaN	NaN	NaN	NaN	NaN	NaN	NaN	NaN	NaN	NaN	NaN	NaN	NaN
O60488;O95573	675;684	O60488;O95573	O60488	Long-chain-fatty-acid--CoA ligase 4;Long-chain-fatty-acid--CoA ligase 3	ACSL4;ACSL3	ASLEKFEIPVKIRLSPEPWTPETGLVTDAFK;MKLERFEIPIKVRLSPEPWTPETGLVTDAFK	350	P	2	1242;763		0.993259	0.00138607	113.76	91.224	107.14	-0.35569	366380000	675	21.6825	0.993259	0.952454	0.808275	107.14	113.76	74.475	0.879694	8.62443	0.0519175	76.588	0.993259	21.6825	0.00170654	107.14	0.839727	7.18944	0.00792524	95.264	NaN	NaN	NaN	NaN	NaN	NaN	NaN	NaN	NaN	NaN	NaN
O60488;O95573	677;686	O60488;O95573	O60488	Long-chain-fatty-acid--CoA ligase 4;Long-chain-fatty-acid--CoA ligase 3	ACSL4;ACSL3	LEKFEIPVKIRLSPEPWTPETGLVTDAFKLK;LERFEIPIKVRLSPEPWTPETGLVTDAFKLK	351	P	2	1242;763		0.999983	0.00138607	113.76	91.224	113.76	1.2767	437490000	677	47.2245	0.999853	0.999983	0.990569	107.14	113.76	74.475	0.996761	24.3226	0.0519175	76.588	0.999853	38.3097	0.00170654	107.14	0.999358	31.1609	0.00792524	95.264	NaN	NaN	NaN	NaN	NaN	NaN	NaN	NaN	NaN	NaN	NaN
O60488;O95573	680;689	O60488;O95573	O60488	Long-chain-fatty-acid--CoA ligase 4;Long-chain-fatty-acid--CoA ligase 3	ACSL4;ACSL3	FEIPIKVRLSPEPWTPETGLVTDAFKLKRKE;FEIPVKIRLSPEPWTPETGLVTDAFKLKRKE	352	P	2	1242;763		0.920686	0.0175378	83.53	57.401	79.466	0.89139	160720000	680	10.636	0.506606	0.920686	NaN	65.25	83.53	NaN	NaN	NaN	NaN	NaN	NaN	NaN	NaN	NaN	0.506606	0	0.0202248	65.25	NaN	NaN	NaN	NaN	NaN	NaN	NaN	NaN	NaN	NaN	NaN
O60502	498	O60502	O60502	Protein O-GlcNAcase	MGEA5	ILSEIVEAKMAEELKPMDTDKESIAESKSPE	353	P	3	766		1	0.000233842	108.18	99.122	83.063	0.32737	47293000	498	83.0632	NaN	1	1	NaN	108.18	83.063	NaN	NaN	NaN	NaN	NaN	NaN	NaN	NaN	NaN	NaN	NaN	NaN	NaN	NaN	NaN	NaN	NaN	NaN	NaN	NaN	NaN	NaN	NaN
O60506	14	O60506	O60506	Heterogeneous nuclear ribonucleoprotein Q	SYNCRIP	__MATEHVNGNGTEEPMDTTSAVIHSENFQT	354	P	4	769	+	1	1.96291e-10	119.96	116	119.96	0.69531	614950000	14	72.4728	1	0.999968	NaN	119.96	79.636	NaN	1	72.4728	1.96291e-10	119.96	NaN	NaN	NaN	NaN	NaN	NaN	NaN	NaN	1	64.1119	5.4242e-08	93.972	NaN	NaN	NaN	NaN	NaN	NaN	NaN
O60508	83	O60508	O60508	Pre-mRNA-processing factor 17	CDC40	TGVHLDPAVKEVQYNPTYETMFAPEFGPENP	355	P	3	771		0.992113	0.000458611	70.917	68.089	70.917	-1.5799	131620000	83	21.0154	0.986586	0.9837	0.992113	70.76	55.705	70.917	NaN	NaN	NaN	NaN	NaN	NaN	NaN	NaN	0.986586	18.6993	0.000469707	70.76	NaN	NaN	NaN	NaN	NaN	NaN	NaN	NaN	NaN	NaN	NaN
O60518	10	O60518	O60518	Ran-binding protein 6	RANBP6	______MAATASAGVPATVSEKQEFYQLLKN	356	P	2	774		1	0.00781786	61.353	36.499	61.353	-1.399	146630000	10	61.3533	1	NaN	NaN	61.353	NaN	NaN	NaN	NaN	NaN	NaN	0	0	NaN	NaN	NaN	NaN	NaN	NaN	NaN	NaN	NaN	NaN	1	52.7897	0.0192297	52.79	1	61.3533	0.00781786
O60551	406	O60551	O60551	Glycylpeptide N-tetradecanoyltransferase 2	NMT2	SPNGKLTDFLSFYTLPSTVMHHPAHKSLKAA	357	P	4	778		0.916931	0.00629292	49.592	46.583	49.592	-0.01989	24809000	406	10.429	NaN	0.916931	NaN	NaN	49.592	NaN	NaN	NaN	NaN	NaN	NaN	NaN	NaN	NaN	NaN	NaN	NaN	NaN	NaN	NaN	NaN	NaN	NaN	NaN	NaN	NaN	NaN	NaN	NaN
O60563	605	O60563	O60563	Cyclin-T1	CCNT1	KIAKSTKSSSLNFSFPSLPTMGQMPGHSSDT	358	P	3	779		0.610904	1.39117e-07	74.282	70.982	74.282	-1.3309	38218000	605	2.06717	0.610904	NaN	0.472361	74.282	NaN	51.444	NaN	NaN	NaN	NaN	NaN	NaN	NaN	NaN	0.610904	2.06717	1.39117e-07	74.282	NaN	NaN	NaN	NaN	NaN	NaN	NaN	NaN	NaN	NaN	NaN
O60566	298	O60566	O60566	Mitotic checkpoint serine/threonine-protein kinase BUB1 beta	BUB1B	STAELSKPTVQPWIAPPMPRAKENELQAGPW	359	P	3	780		0.346002	5.74776e-05	115.94	111.13	99.34	1.0817	0	298	0	0.343617	0.33885	0.346002	115.94	67.459	99.34	NaN	NaN	NaN	NaN	NaN	NaN	NaN	NaN	NaN	NaN	NaN	NaN	0.343617	0	5.74776e-05	115.94	NaN	NaN	NaN	NaN	NaN	NaN	NaN
O60566	301	O60566	O60566	Mitotic checkpoint serine/threonine-protein kinase BUB1 beta	BUB1B	ELSKPTVQPWIAPPMPRAKENELQAGPWNTG	360	P	3	780		0.360029	5.74776e-05	115.94	111.13	64.16	0.95801	0	301	0.535449	0.348497	0.360029	0.346002	115.94	68.942	99.34	NaN	NaN	NaN	NaN	0.348497	0.337558	0.0128014	48.76	NaN	NaN	NaN	NaN	0.343617	0	5.74776e-05	115.94	NaN	NaN	NaN	NaN	NaN	NaN	NaN
O60568	416	O60568	O60568	Procollagen-lysine,2-oxoglutarate 5-dioxygenase 3	PLOD3	QTLRILIEENRKVIAPMLSRHGKLWSNFWGA	361	P	4	781		1	0.00887784	53.828	44.545	53.828	-1.2349	21184000	416	53.8285	NaN	1	NaN	NaN	53.828	NaN	NaN	NaN	NaN	NaN	NaN	NaN	NaN	NaN	NaN	NaN	NaN	NaN	NaN	NaN	NaN	NaN	NaN	NaN	NaN	NaN	NaN	NaN	NaN
O60573	104	O60573	O60573	Eukaryotic translation initiation factor 4E type 2	EIF4E2	ASVEQFWRFYSHMVRPGDLTGHSDFHLFKEG	362	P	5	782		1	6.22528e-05	79.568	71.946	79.568	-0.45778	53702000	104	79.5682	1	NaN	NaN	79.568	NaN	NaN	NaN	NaN	NaN	NaN	NaN	NaN	NaN	NaN	NaN	NaN	NaN	NaN	1	79.5682	6.22528e-05	79.568	NaN	NaN	NaN	NaN	NaN	NaN	NaN
O60664	413	O60664	O60664	Perilipin-3	PLIN3	REALDHMVEYVAQNTPVTWLVGPFAPGITEK	363	P	3	792		0.991954	0.0081747	50.705	45.385	50.705	-4.16	0	413	21.0948	NaN	NaN	0.991954	NaN	NaN	50.705	NaN	NaN	NaN	NaN	NaN	NaN	NaN	NaN	NaN	NaN	NaN	NaN	NaN	NaN	NaN	NaN	NaN	NaN	NaN	NaN	NaN	NaN	NaN
O60664	205	O60664	O60664	Perilipin-3	PLIN3	DTVLGKSEEWADNHLPLTDAELARIATSLDG	364	P	3	792		1	3.53492e-05	65.33	55.282	65.33	-2.8224	0	205	65.3298	NaN	1	NaN	NaN	65.33	NaN	NaN	NaN	NaN	NaN	NaN	NaN	NaN	NaN	NaN	NaN	NaN	NaN	NaN	NaN	NaN	NaN	NaN	NaN	NaN	NaN	NaN	NaN	NaN
O60716	155	O60716	O60716	Catenin delta-1	CTNND1	TVKKVVKTVTTRTVQPVAMGPDGLPVDASSV	365	P	3	802		0.960549	1.06109e-06	121.74	107.91	61.89	2.0457	180440000	155	14.7855	0.592073	0.960549	0.946466	121.74	84.515	82.089	0.346	0	0.00631698	44.555	0.592073	1.62781	0.000399389	121.74	NaN	NaN	NaN	NaN	NaN	NaN	NaN	NaN	NaN	NaN	NaN	NaN	NaN	NaN	NaN
O60716	160	O60716	O60716	Catenin delta-1	CTNND1	VKTVTTRTVQPVAMGPDGLPVDASSVSNNYI	366	P	4	802		0.572232	0.00707591	40.064	36.105	40.064	0.76494	19832000	160	2.30077	NaN	0	0.572232	NaN	NaN	40.064	NaN	NaN	NaN	NaN	NaN	NaN	NaN	NaN	NaN	NaN	NaN	NaN	NaN	NaN	NaN	NaN	NaN	NaN	NaN	NaN	NaN	NaN	NaN
O60716	164	O60716	O60716	Catenin delta-1	CTNND1	TTRTVQPVAMGPDGLPVDASSVSNNYIQTLG	367	P	3	802		0.346	0.00631698	44.555	38.122	44.555	1.1377	0	164	0	0.346	0	NaN	44.555	NaN	NaN	0.346	0	0.00631698	44.555	NaN	NaN	NaN	NaN	NaN	NaN	NaN	NaN	NaN	NaN	NaN	NaN	NaN	NaN	NaN	NaN	NaN	NaN	NaN
O60739;P41567	77;77	O60739;P41567	P41567	Eukaryotic translation initiation factor 1b;Eukaryotic translation initiation factor 1	EIF1B;EIF1	AFKKKFACNGTVIEHPEYGEVIQLQGDQRKN	368	P	4	2355;805		1	0.0142196	45.011	42.955	45.011	-0.3393	33129000	77	45.0114	1	NaN	NaN	45.011	NaN	NaN	NaN	NaN	NaN	NaN	NaN	NaN	NaN	NaN	NaN	NaN	NaN	NaN	NaN	NaN	NaN	NaN	1	45.0114	0.0142196	45.011	NaN	NaN	NaN
O60762	41	O60762	O60762	Dolichol-phosphate mannosyltransferase subunit 1	DPM1	KYSVLLPTYNERENLPLIVWLLVKSFSESGI	369	P	2	807		0.990911	0.0139857	63.16	57.5	63.16	-2.985	0	41	20.3754	NaN	NaN	0.990911	NaN	NaN	63.16	NaN	NaN	NaN	NaN	NaN	NaN	NaN	NaN	NaN	NaN	NaN	NaN	NaN	NaN	NaN	NaN	NaN	NaN	NaN	NaN	NaN	NaN	NaN
O60763	604	O60763	O60763	General vesicular transport factor p115	USO1	LYSRASQKPQPNFPSPEYMIFDHEFTKLVKE	370	P	3	808	+	0.995356	0.000795074	79.237	72.732	79.237	0.51316	299020000	604	23.3553	0.995356	0.974433	0.97355	79.237	64.152	57.922	NaN	NaN	NaN	NaN	0.995356	23.3553	0.000795074	79.237	NaN	NaN	NaN	NaN	0.959546	13.7749	0.00263117	55.881	NaN	NaN	NaN	NaN	NaN	NaN	NaN
O60763	261	O60763	O60763	General vesicular transport factor p115	USO1	NQNFFKEGSYIQRMKPWFEVGDENSGWSAQK	371	P	2	808		1	0.0118163	67.275	56.329	67.275	-2.3594	0	261	67.2753	1	NaN	NaN	67.275	NaN	NaN	NaN	NaN	NaN	NaN	1	67.2753	0.0118163	67.275	NaN	NaN	NaN	NaN	NaN	NaN	NaN	NaN	NaN	NaN	NaN	NaN	NaN	NaN	NaN
O60784	152	O60784	O60784	Target of Myb protein 1	TOM1	VVTIYEDLRRKGLEFPMTDLDMLSPIHTPQR	372	P	4	812	+	1	5.07739e-10	122.77	119.93	122.77	-1.1458	329780000	152	89.7419	0.974266	1	1	64.295	96.131	122.77	NaN	NaN	NaN	NaN	0.966977	14.7176	0.00104894	64.295	0.974266	15.9311	0.0165858	48.077	NaN	NaN	NaN	NaN	NaN	NaN	NaN	NaN	NaN	NaN	NaN
O60814;P06899;P62807;Q8N257;Q99880	51;51;51;51;51	O60814;P06899;P62807;Q8N257;Q99880	O60814	Histone H2B type 1-K;Histone H2B type 1-J;Histone H2B type 1-C/E/F/G/I;Histone H2B type 3-B;Histone H2B type 1-L	HIST1H2BK;HIST1H2BJ;HIST1H2BC;HIST3H2BB;HIST1H2BL	ESYSIYVYKVLKQVHPDTGISSKAMGIMNSF;ESYSVYVYKVLKQVHPDTGISSKAMGIMNSF	373	P	3	1444;3015;5656;7295;813		1	0.000126297	64.733	54.026	64.733	1.8575	0	51	64.7329	NaN	1	1	NaN	64.733	54.152	NaN	NaN	NaN	NaN	NaN	NaN	NaN	NaN	NaN	NaN	NaN	NaN	NaN	NaN	NaN	NaN	NaN	NaN	NaN	NaN	NaN	NaN	NaN
O60826	58	O60826	O60826	Coiled-coil domain-containing protein 22	CCDC22	RVINPAVGSGLSPLLPLAMSARFRLAMSLAQ	374	P	2	815		0.978534	3.39025e-08	126.16	114.18	119.32	1.1602	149430000	58	16.5881	0.978534	0.947996	0.963291	119.32	126.16	119.56	NaN	NaN	NaN	NaN	0.963974	14.2745	0.00194435	100.11	0.978534	16.5881	7.72355e-08	119.32	NaN	NaN	NaN	NaN	NaN	NaN	NaN	NaN	NaN	NaN	NaN
O60828	203	O60828	O60828	Polyglutamine-binding protein 1	PQBP1	PKSKKAVSRKDEELDPMDPSSYSDAPRGTWS	375	P	3	816		0.999848	0.00353507	95.666	86.482	95.666	0.16421	67445000	203	38.1837	NaN	0.999848	0.999625	NaN	95.666	71.073	NaN	NaN	NaN	NaN	NaN	NaN	NaN	NaN	NaN	NaN	NaN	NaN	NaN	NaN	NaN	NaN	NaN	NaN	NaN	NaN	NaN	NaN	NaN
O60828	206	O60828	O60828	Polyglutamine-binding protein 1	PQBP1	KKAVSRKDEELDPMDPSSYSDAPRGTWSTGL	376	P	4	816		0.549888	0.0179986	44.052	36.837	44.052	2.1889	73381000	206	0.876645	NaN	NaN	0.549888	NaN	NaN	44.052	NaN	NaN	NaN	NaN	NaN	NaN	NaN	NaN	NaN	NaN	NaN	NaN	NaN	NaN	NaN	NaN	NaN	NaN	NaN	NaN	NaN	NaN	NaN
O60830;Q99595	8;8	O60830;Q99595	O60830	Mitochondrial import inner membrane translocase subunit Tim17-B;Mitochondrial import inner membrane translocase subunit Tim17-A	TIMM17B;TIMM17A	________MEEYAREPCPWRIVDDCGGAFTM	377	P	2	7235;817		1	0.00924906	51.436	45.195	42.336	-0.98157	98811000	8	42.3359	1	NaN	NaN	51.436	NaN	NaN	1	51.4359	0.00924906	51.436	NaN	NaN	NaN	NaN	1	45.9725	0.0194545	45.973	1	42.3359	0.026624	42.336	NaN	NaN	NaN	NaN	NaN	NaN	NaN
O60830;Q99595	10;10	O60830;Q99595	O60830	Mitochondrial import inner membrane translocase subunit Tim17-B;Mitochondrial import inner membrane translocase subunit Tim17-A	TIMM17B;TIMM17A	______MEEYAREPCPWRIVDDCGGAFTMGT;______MEEYAREPCPWRIVDDCGGAFTMGV	378	P	2	7235;817		1	0.00924906	51.436	45.195	42.336	-0.98157	98811000	10	42.3359	1	NaN	NaN	51.436	NaN	NaN	1	51.4359	0.00924906	51.436	NaN	NaN	NaN	NaN	1	45.9725	0.0194545	45.973	1	42.3359	0.026624	42.336	NaN	NaN	NaN	NaN	NaN	NaN	NaN
O60831	162	O60831	O60831	PRA1 family protein 2	PRAF2	NKIENKIESIGLKRTPMGLLLEALGQEQEAG	379	P	3	818		1	4.48715e-09	171.49	155.73	60.246	-2.9383	2630300000	162	60.246	1	1	1	135.5	171.49	145.29	NaN	NaN	NaN	NaN	1	115.136	0.000530976	115.14	1	98.1049	0.000298706	135.5	1	60.246	0.00765545	60.246	NaN	NaN	NaN	NaN	NaN	NaN	NaN
O60832	97	O60832	O60832	H/ACA ribonucleoprotein complex subunit 4	DKC1	EIGDYIRTGFINLDKPSNPSSHEVVAWIRRI	380	P	4	819		1	0.0288071	53.342	41.028	53.342	2.2171	63639000	97	53.3415	1	NaN	NaN	53.342	NaN	NaN	1	53.3415	0.0288071	53.342	NaN	NaN	NaN	NaN	NaN	NaN	NaN	NaN	NaN	NaN	NaN	NaN	NaN	NaN	NaN	NaN	NaN	NaN	NaN
O60832	100	O60832	O60832	H/ACA ribonucleoprotein complex subunit 4	DKC1	DYIRTGFINLDKPSNPSSHEVVAWIRRILRV	381	P	4	819		1	0.0288071	53.342	41.028	53.342	2.2171	63639000	100	53.3415	1	NaN	NaN	53.342	NaN	NaN	1	53.3415	0.0288071	53.342	NaN	NaN	NaN	NaN	NaN	NaN	NaN	NaN	NaN	NaN	NaN	NaN	NaN	NaN	NaN	NaN	NaN	NaN	NaN
O60832	78	O60832	O60832	H/ACA ribonucleoprotein complex subunit 4	DKC1	NVRTTHYTPLACGSNPLKREIGDYIRTGFIN	382	P	3	819		0.996185	0.0202876	57.434	53.192	57.434	0.33569	111750000	78	24.169	0.996185	NaN	NaN	57.434	NaN	NaN	NaN	NaN	NaN	NaN	NaN	NaN	NaN	NaN	NaN	NaN	NaN	NaN	NaN	NaN	NaN	NaN	0.996185	24.169	0.0202876	57.434	NaN	NaN	NaN
O60841	867	O60841	O60841	Eukaryotic translation initiation factor 5B	EIF5B	HCEELRAQVMEVKALPGMGTTIDVILINGRL	383	P	2	820		1	0.00122107	114.82	97.605	112.86	0.55288	547410000	867	112.857	1	1	1	110.98	114.82	112.86	NaN	NaN	NaN	NaN	NaN	NaN	NaN	NaN	NaN	NaN	NaN	NaN	1	110.978	0.00409884	110.98	NaN	NaN	NaN	NaN	NaN	NaN	NaN
O60841	1107	O60841	O60841	Eukaryotic translation initiation factor 5B	EIF5B	CKIKILPQYIFNSRDPIVMGVTVEAGQVKQG	384	P	3	820		0.999955	0.0011135	106.12	100.91	79.762	-0.16162	1310300000	1107	43.5059	0.999911	0.999955	NaN	91.722	106.12	NaN	0.988018	19.1624	0.0436598	56.688	0.995051	23.0334	0.00433419	91.722	0.999911	40.4864	0.00427993	69.152	NaN	NaN	NaN	NaN	NaN	NaN	NaN	NaN	NaN	NaN	NaN
O60841	696	O60841	O60841	Eukaryotic translation initiation factor 5B	EIF5B	QTKMIKNFDRENVRIPGMLIIDTPGHESFSN	385	P	3	820		0.999997	9.29042e-05	76.155	71.754	76.155	0.069841	1464300000	696	55.5294	0.999965	NaN	0.999997	74.748	NaN	76.155	0.998683	28.8001	0.00529742	45.07	0	0	NaN	NaN	0.999965	44.6131	9.29042e-05	74.748	0.99974	35.8568	0.00364108	47.507	NaN	NaN	NaN	NaN	NaN	NaN	NaN
O60885	531	O60885	O60885	Bromodomain-containing protein 4	BRD4	EQLKAVHEQLAALSQPQQNKPKKKEKDKKEK	386	P	4	826		1	0.0105913	100.55	88.575	48.477	0.13585	111680000	531	48.4769	1	0	1	63.337	NaN	100.55	1	63.337	0.0389013	63.337	0.563282	1.10525	0.0105913	47.237	NaN	NaN	NaN	NaN	NaN	NaN	NaN	NaN	0	0	NaN	NaN	NaN	NaN	NaN
O60885	536	O60885	O60885	Bromodomain-containing protein 4	BRD4	VHEQLAALSQPQQNKPKKKEKDKKEKKKEKH	387	P	4	826		1	0.000365461	105.89	91.116	48.477	0.13585	457010000	536	48.4769	1	0.998576	1	63.337	105.89	100.55	1	63.337	0.0389013	63.337	NaN	NaN	NaN	NaN	NaN	NaN	NaN	NaN	NaN	NaN	NaN	NaN	0.992822	21.4088	0.0650705	56.039	0.853744	7.66215	0.0965137
O60888	152	O60888	O60888	Protein CutA	CUTA	VRSVHPYEVAEVIALPVEQGNFPYLQWVRQV	388	P	2	827		1	0.0033675	100.45	83.568	88.73	-0.12806	1416400000	152	73.5749	1	1	0.999957	100.45	88.73	53.998	NaN	NaN	NaN	NaN	0.999999	60.0611	0.0033675	78.837	1	71.1132	0.0107668	100.45	NaN	NaN	NaN	NaN	NaN	NaN	NaN	NaN	NaN	NaN	NaN
O60888	159	O60888	O60888	Protein CutA	CUTA	EVAEVIALPVEQGNFPYLQWVRQVTESVSDS	389	P	2	827		1	0.000122199	100.45	83.568	100.45	1.5971	1660800000	159	78.2993	1	1	0.999956	100.45	88.79	72.805	NaN	NaN	NaN	NaN	1	68.5391	0.000334982	78.837	1	78.2993	0.000376636	100.45	NaN	NaN	NaN	NaN	NaN	NaN	NaN	NaN	NaN	NaN	NaN
O60927	121	O60927	O60927	Protein phosphatase 1 regulatory subunit 11	PPP1R11	TPTTPPQPPDPSQPPPGPMQH__________	390	P	3	835		0.416714	0.0192859	41.166	34.368	41.166	0.7842	0	121	0.498265	NaN	0.416714	NaN	NaN	41.166	NaN	NaN	NaN	NaN	NaN	NaN	NaN	NaN	NaN	NaN	NaN	NaN	NaN	NaN	NaN	NaN	NaN	NaN	NaN	NaN	NaN	NaN	NaN	NaN
O75027	182	O75027	O75027	ATP-binding cassette sub-family B member 7, mitochondrial	ABCB7	SLNQMSGNMLNLSDAPNTVATMATAVLIGYG	391	P	3	841		1	0.000279148	44.369	39.512	44.369	-0.64572	10409000	182	44.3689	1	NaN	NaN	44.369	NaN	NaN	NaN	NaN	NaN	NaN	1	44.3689	0.000279148	44.369	NaN	NaN	NaN	NaN	NaN	NaN	NaN	NaN	NaN	NaN	NaN	NaN	NaN	NaN	NaN
O75113	535	O75113	O75113	NEDD4-binding protein 1	N4BP1	LFPENGLHQQPEPLLPNNMKSACEKRLGCCS	392	P	3	860		0.997497	5.8377e-06	90.972	84.202	90.972	0.71964	589660000	535	26.7694	0.997497	0.996236	0.994557	90.972	74.364	58.49	0.997497	26.7694	5.8377e-06	90.972	NaN	NaN	NaN	NaN	NaN	NaN	NaN	NaN	NaN	NaN	NaN	NaN	NaN	NaN	NaN	NaN	NaN	NaN	NaN
O75116	11	O75116	O75116	Rho-associated protein kinase 2	ROCK2	_____MSRPPPTGKMPGAPETAPGDGAGASR	393	P	2	861		1	0.00429867	112.51	96.616	112.51	-1.0661	91649000	11	65.3174	0.80168	0.999996	1	40.404	83.314	112.51	0.80168	7.68357	0.00429867	40.404	NaN	NaN	NaN	NaN	NaN	NaN	NaN	NaN	NaN	NaN	NaN	NaN	NaN	NaN	NaN	NaN	NaN	NaN	NaN
O75122	1009	O75122	O75122	CLIP-associating protein 2	CLASP2	SQTALDNKASLLHSMPTHSSPRSRDYNPYNY	394	P	5	863		0.967166	3.94406e-05	108.88	102.38	108.88	0.68415	392650000	1009	14.6918	0.966549	0.967166	0.831379	107.76	108.88	90.907	NaN	NaN	NaN	NaN	NaN	NaN	NaN	NaN	0.966549	14.6082	7.65002e-05	107.76	0	0	NaN	NaN	NaN	NaN	NaN	NaN	NaN	NaN	NaN
O75122	1014	O75122	O75122	CLIP-associating protein 2	CLASP2	DNKASLLHSMPTHSSPRSRDYNPYNYSDSIS	395	P	4	863		0.629778	3.73469e-05	63.803	58.202	52.721	-0.24533	138010000	1014	2.30725	0.554801	0.629778	NaN	63.803	52.721	NaN	NaN	NaN	NaN	NaN	NaN	NaN	NaN	NaN	0.554801	0.955827	3.73469e-05	63.803	0.523279	0.404694	0.000184872	59.282	NaN	NaN	NaN	NaN	NaN	NaN	NaN
O75122	979	O75122	O75122	CLIP-associating protein 2	CLASP2	KRDSKKDDGDSMCGGPGMSDPRAGGDATDSS	396	P	3	863		0.994783	0.0143631	57.496	57.496	57.496	-2.3348	6844100	979	22.8068	NaN	0.994783	NaN	NaN	57.496	NaN	NaN	NaN	NaN	NaN	NaN	NaN	NaN	NaN	NaN	NaN	NaN	NaN	NaN	NaN	NaN	NaN	NaN	NaN	NaN	NaN	NaN	NaN	NaN
O75132	959	O75132	O75132	Zinc finger BED domain-containing protein 4	ZBED4	SREMSTQMSTLSQVIPMVHILNRKVEMLFEE	397	P	3	867		1	0.000931529	62.617	60.729	62.617	-1.5765	62572000	959	62.6167	NaN	1	NaN	NaN	62.617	NaN	NaN	NaN	NaN	NaN	NaN	NaN	NaN	NaN	NaN	NaN	NaN	NaN	NaN	NaN	NaN	NaN	NaN	NaN	NaN	NaN	NaN	NaN	NaN
O75143	381	O75143	O75143	Autophagy-related protein 13	ATG13	LETIFVRKVGAFVNKPINQVTLTSLDIPFAM	398	P	3	869		0.999931	0.0151463	40.669	21.95	40.669	-1.2742	72845000	381	38.612	0.999931	NaN	NaN	40.669	NaN	NaN	0.999931	38.612	0.0151463	40.669	NaN	NaN	NaN	NaN	NaN	NaN	NaN	NaN	NaN	NaN	NaN	NaN	NaN	NaN	NaN	NaN	NaN	NaN	NaN
O75143	393	O75143	O75143	Autophagy-related protein 13	ATG13	VNKPINQVTLTSLDIPFAMFAPKNLELEDTD	399	P	3	869		0.500034	0.0151463	40.669	21.95	40.669	-1.2742	72845000	393	0	0.500034	NaN	NaN	40.669	NaN	NaN	0.500034	0	0.0151463	40.669	NaN	NaN	NaN	NaN	NaN	NaN	NaN	NaN	NaN	NaN	NaN	NaN	NaN	NaN	NaN	NaN	NaN	NaN	NaN
O75143	399	O75143	O75143	Autophagy-related protein 13	ATG13	QVTLTSLDIPFAMFAPKNLELEDTDPMVNPP	400	P	3	869		0.500034	0.0151463	40.669	21.95	40.669	-1.2742	72845000	399	0	0.500034	NaN	NaN	40.669	NaN	NaN	0.500034	0	0.0151463	40.669	NaN	NaN	NaN	NaN	NaN	NaN	NaN	NaN	NaN	NaN	NaN	NaN	NaN	NaN	NaN	NaN	NaN	NaN	NaN
O75153	1279	O75153	O75153	Clustered mitochondria protein homolog	CLUH	HQLQEASRNRDRAEEPMATEPAPAGAPGDLG	401	P	4	877		0.99698	8.42286e-06	56.252	54.371	56.252	0.65445	125210000	1279	26.1387	0.995049	0.99698	0.994607	48.096	56.252	51.956	NaN	NaN	NaN	NaN	0.995049	24.0775	0.000537637	48.096	NaN	NaN	NaN	NaN	NaN	NaN	NaN	NaN	NaN	NaN	NaN	NaN	NaN	NaN	NaN
O75153	316	O75153	O75153	Clustered mitochondria protein homolog	CLUH	QKKRVQRHPFERIATPFQVYSWTAPQAEHAM	402	P	3	877		1	0.0103503	40.197	34.148	40.197	-0.1633	77120000	316	40.1974	NaN	1	NaN	NaN	40.197	NaN	NaN	NaN	NaN	NaN	NaN	NaN	NaN	NaN	NaN	NaN	NaN	NaN	NaN	NaN	NaN	NaN	NaN	NaN	NaN	NaN	NaN	NaN	NaN
O75153	325	O75153	O75153	Clustered mitochondria protein homolog	CLUH	FERIATPFQVYSWTAPQAEHAMDCVRAEDAY	403	P	3	877		1	0.00016854	75.112	67.666	40.197	-0.1633	212180000	325	40.1974	NaN	1	NaN	NaN	75.112	NaN	NaN	NaN	NaN	NaN	NaN	NaN	NaN	NaN	NaN	NaN	NaN	NaN	NaN	NaN	NaN	NaN	NaN	NaN	NaN	NaN	NaN	NaN	NaN
O75153	225	O75153	O75153	Clustered mitochondria protein homolog	CLUH	KPLQCLKVLTMSGWNPPPGNRKMHGDLMYLF	404	P	2	877		0.986015	0.029978	85.533	74.878	85.533	0.18694	9408100	225	18.4202	0.986015	0.63325	NaN	85.533	76.228	NaN	NaN	NaN	NaN	NaN	0.986015	18.4202	0.0340845	85.533	NaN	NaN	NaN	NaN	NaN	NaN	NaN	NaN	NaN	NaN	NaN	NaN	NaN	NaN	NaN
O75153	226	O75153	O75153	Clustered mitochondria protein homolog	CLUH	PLQCLKVLTMSGWNPPPGNRKMHGDLMYLFV	405	P	2	877		0.986015	0.029978	85.533	74.878	85.533	0.18694	9408100	226	18.4202	0.986015	0.63325	NaN	85.533	76.228	NaN	NaN	NaN	NaN	NaN	0.986015	18.4202	0.0340845	85.533	NaN	NaN	NaN	NaN	NaN	NaN	NaN	NaN	NaN	NaN	NaN	NaN	NaN	NaN	NaN
O75153	227	O75153	O75153	Clustered mitochondria protein homolog	CLUH	LQCLKVLTMSGWNPPPGNRKMHGDLMYLFVI	406	P	2	877		0.7335	0.029978	76.228	62.458	76.228	-0.20845	0	227	1.38672	NaN	0.7335	NaN	NaN	76.228	NaN	NaN	NaN	NaN	NaN	NaN	NaN	NaN	NaN	NaN	NaN	NaN	NaN	NaN	NaN	NaN	NaN	NaN	NaN	NaN	NaN	NaN	NaN	NaN
O75155	1198	O75155	O75155	Cullin-associated NEDD8-dissociated protein 2	CAND2	RAVAALLTIPEVGKSPIMADFSSQIRSNPEL	407	P	3	879		0.999905	7.79938e-05	108.59	106.05	108.59	-0.035836	687850000	1198	40.2154	0.999773	0.999905	NaN	96.993	108.59	NaN	0.999773	36.4304	0.00118763	79.237	NaN	NaN	NaN	NaN	0.847592	7.4518	0.00929548	96.993	0.99965	34.5551	0.011383	60.765	NaN	NaN	NaN	NaN	NaN	NaN	NaN
O75155	371	O75155	O75155	Cullin-associated NEDD8-dissociated protein 2	CAND2	AKCIAALISSRPDLLPDFHCTLAPVLIRRFK	408	P	3	879		0.99823	0.0294918	44.196	27.797	44.196	2.0789	318300000	371	27.5113	0.99823	NaN	NaN	44.196	NaN	NaN	NaN	NaN	NaN	NaN	0.99823	27.5113	0.0294918	44.196	NaN	NaN	NaN	NaN	NaN	NaN	NaN	NaN	NaN	NaN	NaN	NaN	NaN	NaN	NaN
O75155	379	O75155	O75155	Cullin-associated NEDD8-dissociated protein 2	CAND2	SSRPDLLPDFHCTLAPVLIRRFKEREENVKA	409	P	3	879		0.999655	0.0294918	44.196	27.797	44.196	2.0789	318300000	379	34.6157	0.999655	NaN	NaN	44.196	NaN	NaN	NaN	NaN	NaN	NaN	0.999655	34.6157	0.0294918	44.196	NaN	NaN	NaN	NaN	NaN	NaN	NaN	NaN	NaN	NaN	NaN	NaN	NaN	NaN	NaN
O75164	982	O75164	O75164	Lysine-specific demethylase 4A	KDM4A	WTDGQVYGAKFVASHPIQMYQVEFEDGSQLV	410	P	3	882		1	0.00019941	74.584	69.131	74.584	0.33126	20069000	982	74.5842	1	NaN	NaN	74.584	NaN	NaN	NaN	NaN	NaN	NaN	NaN	NaN	NaN	NaN	1	74.5842	0.00019941	74.584	NaN	NaN	NaN	NaN	NaN	NaN	NaN	NaN	NaN	NaN	NaN
O75170	438	O75170	O75170	Serine/threonine-protein phosphatase 6 regulatory subunit 2	PPP6R2	NGNRSLETPQPAASLPDNTMVTHLFQKCCLV	411	P	3	885		0.904849	0.00860358	50.055	42.609	50.055	-0.8066	69235000	438	10.767	0.904849	NaN	NaN	50.055	NaN	NaN	0.904849	10.767	0.00860358	50.055	NaN	NaN	NaN	NaN	NaN	NaN	NaN	NaN	NaN	NaN	NaN	NaN	NaN	NaN	NaN	NaN	NaN	NaN	NaN
O75175	646	O75175	O75175	CCR4-NOT transcription complex subunit 3	CNOT3	SERIRQYLPRNPCPTPPYHHQMPPPHSDTVE	412	P	4	886		0.482164	0.000118565	74.579	72.214	65.213	0.13794	0	646	1.06151	0.482164	0	NaN	74.579	NaN	NaN	NaN	NaN	NaN	NaN	NaN	NaN	NaN	NaN	0.461402	1.18968	0.000118565	74.579	0.482164	1.06151	0.000359653	65.213	NaN	NaN	NaN	NaN	NaN	NaN	NaN
O75175	647	O75175	O75175	CCR4-NOT transcription complex subunit 3	CNOT3	ERIRQYLPRNPCPTPPYHHQMPPPHSDTVEF	413	P	5	886		0.798235	9.48654e-06	103.84	101.56	88.836	0.089657	301560000	647	8.15284	0	0.798235	0.738385	NaN	103.84	85.777	NaN	NaN	NaN	NaN	NaN	NaN	NaN	NaN	NaN	NaN	NaN	NaN	0	0	NaN	NaN	NaN	NaN	NaN	NaN	NaN	NaN	NaN
O75175	653	O75175	O75175	CCR4-NOT transcription complex subunit 3	CNOT3	LPRNPCPTPPYHHQMPPPHSDTVEFYQRLST	414	P	5	886		0.291949	0.00256542	53.747	48.64	53.747	-1.1203	0	653	0	0	0.291949	NaN	NaN	53.747	NaN	NaN	NaN	NaN	NaN	NaN	NaN	NaN	NaN	NaN	NaN	NaN	NaN	0	0	NaN	NaN	NaN	NaN	NaN	NaN	NaN	NaN	NaN
O75175	654	O75175	O75175	CCR4-NOT transcription complex subunit 3	CNOT3	PRNPCPTPPYHHQMPPPHSDTVEFYQRLSTE	415	P	5	886		0.291949	0.00256542	53.747	48.64	53.747	-1.1203	0	654	0	0	0.291949	NaN	NaN	53.747	NaN	NaN	NaN	NaN	NaN	NaN	NaN	NaN	NaN	NaN	NaN	NaN	NaN	0	0	NaN	NaN	NaN	NaN	NaN	NaN	NaN	NaN	NaN
O75175	655	O75175	O75175	CCR4-NOT transcription complex subunit 3	CNOT3	RNPCPTPPYHHQMPPPHSDTVEFYQRLSTET	416	P	5	886		0.291949	0.00256542	53.747	48.64	53.747	-1.1203	0	655	0	0	0.291949	NaN	NaN	53.747	NaN	NaN	NaN	NaN	NaN	NaN	NaN	NaN	NaN	NaN	NaN	NaN	NaN	0	0	NaN	NaN	NaN	NaN	NaN	NaN	NaN	NaN	NaN
O75179;Q8IWZ3	1288;1260	O75179;Q8IWZ3	O75179	Ankyrin repeat domain-containing protein 17;Ankyrin repeat and KH domain-containing protein 1	ANKRD17;ANKHD1	DRKANVEHRAKTGLTPLMEAASGGYAEVGRV	417	P	2	5505;888		1	0.00105614	95.264	80.063	95.264	-1.2635	182160000	1288	95.2645	1	1	NaN	95.264	57.826	NaN	NaN	NaN	NaN	NaN	1	95.2645	0.00105614	95.264	1	76.7332	0.00117301	76.733	NaN	NaN	NaN	NaN	NaN	NaN	NaN	NaN	NaN	NaN	NaN
O75306	229	O75306	O75306	NADH dehydrogenase [ubiquinone] iron-sulfur protein 2, mitochondrial	NDUFS2	YERVSGARMHAAYIRPGGVHQDLPLGLMDDI	418	P	5	901		0.986656	0.00950168	100.42	100.42	100.42	0.045507	317460000	229	18.7359	0.986656	NaN	NaN	100.42	NaN	NaN	NaN	NaN	NaN	NaN	NaN	NaN	NaN	NaN	0.986656	18.7359	0.00950168	100.42	NaN	NaN	NaN	NaN	NaN	NaN	NaN	NaN	NaN	NaN	NaN
O75312	420	O75312	O75312	Zinc finger protein ZPR1	ZPR1	MDDPAGNSYLQNVYAPEDDPEMKVERYKRTF	419	P	4	902		0.61216	0.000103994	86.982	84.892	86.982	-0.072121	36908000	420	1.98213	0.566713	0.61216	NaN	45.125	86.982	NaN	NaN	NaN	NaN	NaN	NaN	NaN	NaN	NaN	NaN	NaN	NaN	NaN	0.566713	1.50323	0.00286013	45.125	NaN	NaN	NaN	NaN	NaN	NaN	NaN
O75312	424	O75312	O75312	Zinc finger protein ZPR1	ZPR1	AGNSYLQNVYAPEDDPEMKVERYKRTFDQNE	420	P	3	902		0.969986	1.96424e-05	96.338	96.338	96.338	-1.0423	517580000	424	15.4905	0.969986	0.94975	0.963597	96.338	94.006	95.212	0.845075	7.36773	5.43048e-05	80.984	0.945965	12.4394	2.0895e-05	68.444	0.969986	15.4905	2.23963e-05	96.338	NaN	NaN	NaN	NaN	NaN	NaN	NaN	NaN	NaN	NaN	NaN
O75323	178	O75323	O75323	Protein NipSnap homolog 2	GBAS	SRKNQLLLEFSFWNEPVPRSGPNIYELRSYQ	421	P	3	905		1	1.00856e-33	215.53	201.5	75.445	0.83469	332900000	178	75.445	1	1	NaN	75.445	215.53	NaN	NaN	NaN	NaN	NaN	NaN	NaN	NaN	NaN	1	54.7679	0.0248608	54.768	1	75.445	0.00205334	75.445	NaN	NaN	NaN	NaN	NaN	NaN	NaN
O75323	180	O75323	O75323	Protein NipSnap homolog 2	GBAS	KNQLLLEFSFWNEPVPRSGPNIYELRSYQLR	422	P	3	905		1	1.00856e-33	215.53	201.5	75.445	0.83469	332900000	180	75.445	1	1	NaN	75.445	215.53	NaN	NaN	NaN	NaN	NaN	NaN	NaN	NaN	NaN	1	54.7679	0.0248608	54.768	1	75.445	0.00205334	75.445	NaN	NaN	NaN	NaN	NaN	NaN	NaN
O75323	196	O75323	O75323	Protein NipSnap homolog 2	GBAS	RSGPNIYELRSYQLRPGTMIEWGNYWARAIR	423	P	3	905		1	3.28532e-09	166.76	150.04	155.03	0.048536	882000000	196	155.03	1	NaN	1	166.76	NaN	155.03	1	138.084	1.60205e-05	138.08	NaN	NaN	NaN	NaN	1	166.759	3.28532e-09	166.76	1	97.0952	0.00113762	97.095	NaN	NaN	NaN	NaN	NaN	NaN	NaN
O75369	1273	O75369	O75369	Filamin-B	FLNB	LTQVGGDHIKAHIANPSGASTECFVTDNADG	424	P	3	918		0.98756	0.00563809	41.434	33.791	41.434	0.19199	34950000	1273	18.9975	0.98756	NaN	NaN	41.434	NaN	NaN	NaN	NaN	NaN	NaN	NaN	NaN	NaN	NaN	NaN	NaN	NaN	NaN	NaN	NaN	NaN	NaN	0.98756	18.9975	0.00563809	41.434	NaN	NaN	NaN
O75369	2159	O75369	O75369	Filamin-B	FLNB	EIVPMGKNSHCVRFVPQEMGVHTVSVKYRGQ	425	P	3	918		1	0.0300039	57.136	43.999	57.136	0.32885	53849000	2159	57.1357	NaN	NaN	1	NaN	NaN	57.136	NaN	NaN	NaN	NaN	NaN	NaN	NaN	NaN	NaN	NaN	NaN	NaN	NaN	NaN	NaN	NaN	NaN	NaN	NaN	NaN	NaN	NaN	NaN
O75369	1490	O75369	O75369	Filamin-B	FLNB	GDGTHTVTYTPSQEGPYMVSVKYADEEIPRS	426	P	3	918		0.989762	7.50448e-07	87.749	82.693	65.69	1.871	296700000	1490	19.8538	0.983225	0.986222	0.989762	57.78	87.749	65.69	0.983225	17.6863	0.000141195	52.198	NaN	NaN	NaN	NaN	NaN	NaN	NaN	NaN	0.97294	15.5675	6.76498e-05	57.78	NaN	NaN	NaN	NaN	NaN	NaN	NaN
O75369	1989	O75369	O75369	Filamin-B	FLNB	HLVSIKKNGNHVANSPVSIMVVQSEIGDARR	427	P	3	918		1	0.0270388	44.258	37.38	44.258	-1.7741	0	1989	44.2579	NaN	NaN	1	NaN	NaN	44.258	NaN	NaN	NaN	NaN	NaN	NaN	NaN	NaN	NaN	NaN	NaN	NaN	NaN	NaN	NaN	NaN	NaN	NaN	NaN	NaN	NaN	NaN	NaN
O75369	1163	O75369	O75369	Filamin-B	FLNB	VGEAGLLSVDCSEAGPGALGLEAVSDSGTKA	428	P	3	918		1	2.25313e-05	71.608	66.343	71.608	-0.97212	17738000	1163	71.6084	1	NaN	NaN	71.608	NaN	NaN	NaN	NaN	NaN	NaN	NaN	NaN	NaN	NaN	NaN	NaN	NaN	NaN	NaN	NaN	NaN	NaN	1	71.6084	2.25313e-05	71.608	NaN	NaN	NaN
O75369	2444	O75369	O75369	Filamin-B	FLNB	MDCQETPEGYKVMYTPMAPGNYLISVKYGGP	429	P	2	918		0.990456	0.0138775	62.258	47.115	62.258	0.52969	0	2444	20.163	0.990456	NaN	NaN	62.258	NaN	NaN	NaN	NaN	NaN	NaN	NaN	NaN	NaN	NaN	0.990456	20.163	0.0138775	62.258	NaN	NaN	NaN	NaN	NaN	NaN	NaN	NaN	NaN	NaN	NaN
O75369	912	O75369	O75369	Filamin-B	FLNB	DIIDNYDYSHTVKYTPTQQGNMQVLVTYGGD	430	P	2	918		0.999998	0.000657427	87.66	76.046	87.66	0.36078	132200000	912	57.4841	0.999998	NaN	0.999995	87.66	NaN	62.19	0.999984	48.881	0.0283793	73.156	0.999998	57.4841	0.000657427	87.66	NaN	NaN	NaN	NaN	NaN	NaN	NaN	NaN	NaN	NaN	NaN	NaN	NaN	NaN	NaN
O75376	1667	O75376	O75376	Nuclear receptor corepressor 1	NCOR1	IIDLTNMPPTILVPHPGGTSTPPMDRITYIP	431	P	3	919		0.307337	0.0102126	40.104	40.104	40.104	0.018283	0	1667	0.637365	NaN	0.307337	NaN	NaN	40.104	NaN	NaN	NaN	NaN	NaN	NaN	NaN	NaN	NaN	NaN	NaN	NaN	NaN	NaN	NaN	NaN	NaN	NaN	NaN	NaN	NaN	NaN	NaN	NaN
O75376	905	O75376	O75376	Nuclear receptor corepressor 1	NCOR1	DGEPERQRMFPMDSKPSLLNPTGSILVSSPL	432	P	5	919		0.428952	4.71534e-05	50.627	50.627	50.627	0.073506	0	905	0.402666	0.428952	NaN	NaN	50.627	NaN	NaN	NaN	NaN	NaN	NaN	NaN	NaN	NaN	NaN	0.428952	0.402666	4.71534e-05	50.627	NaN	NaN	NaN	NaN	NaN	NaN	NaN	NaN	NaN	NaN	NaN
O75390	148	O75390	O75390	Citrate synthase, mitochondrial	CS	QVSWLSKEWAKRAALPSHVVTMLDNFPTNLH	433	P	4	926		0.994806	5.04678e-07	68.101	60.606	68.101	0.76189	89303000	148	25.8323	0.367091	NaN	0.994806	52.155	NaN	68.101	NaN	NaN	NaN	NaN	0.365268	0.611395	0.000123277	52.155	0.367091	0.649322	0.00774546	49.366	NaN	NaN	NaN	NaN	NaN	NaN	NaN	NaN	NaN	NaN	NaN
O75390	159	O75390	O75390	Citrate synthase, mitochondrial	CS	RAALPSHVVTMLDNFPTNLHPMSQLSAAVTA	434	P	4	926		0.891594	2.05224e-13	117.09	110.12	64.127	0.72022	5853100000	159	11.5496	0.771835	0.891594	0.750604	116.94	117.09	73.371	0.72947	4.35415	5.6659e-08	116.94	0.771835	5.31275	3.02099e-08	84.903	0.547434	0.982776	8.44005e-08	113.7	0.558667	1.02387	4.25713e-11	102.26	NaN	NaN	NaN	NaN	NaN	NaN	NaN
O75390	164	O75390	O75390	Citrate synthase, mitochondrial	CS	SHVVTMLDNFPTNLHPMSQLSAAVTALNSES	435	P	3	926		0.999999	1.90008e-107	228.95	219.83	228.95	0.36044	211300000	164	61.3501	NaN	0.999999	0.999931	NaN	228.95	167.35	NaN	NaN	NaN	NaN	NaN	NaN	NaN	NaN	NaN	NaN	NaN	NaN	NaN	NaN	NaN	NaN	NaN	NaN	NaN	NaN	NaN	NaN	NaN
O75390	372	O75390	O75390	Citrate synthase, mitochondrial	CS	YTCQREFALKHLPNDPMFKLVAQLYKIVPNV	436	P	3	926		0.998685	0.00103517	102.65	86.765	84.559	0.11352	1786900000	372	28.8046	NaN	0.995769	0.998685	NaN	102.65	84.559	NaN	NaN	NaN	NaN	NaN	NaN	NaN	NaN	NaN	NaN	NaN	NaN	NaN	NaN	NaN	NaN	NaN	NaN	NaN	NaN	NaN	NaN	NaN
O75396	104	O75396	O75396	Vesicle-trafficking protein SEC22b	SEC22B	EDLHSEFDEQHGKKVPTVSRPYSFIEFDTFI	437	P	2	929		1	0.0205465	81.494	6.734	81.494	-0.98948	33576000	104	81.4939	NaN	NaN	1	NaN	NaN	81.494	NaN	NaN	NaN	NaN	NaN	NaN	NaN	NaN	NaN	NaN	NaN	NaN	NaN	NaN	NaN	NaN	NaN	NaN	NaN	NaN	NaN	NaN	NaN
O75396	109	O75396	O75396	Vesicle-trafficking protein SEC22b	SEC22B	EFDEQHGKKVPTVSRPYSFIEFDTFIQKTKK	438	P	2	929		1	0.0205465	81.494	6.734	81.494	-0.98948	33576000	109	81.4939	NaN	NaN	1	NaN	NaN	81.494	NaN	NaN	NaN	NaN	NaN	NaN	NaN	NaN	NaN	NaN	NaN	NaN	NaN	NaN	NaN	NaN	NaN	NaN	NaN	NaN	NaN	NaN	NaN
O75414	146	O75414	O75414	Nucleoside diphosphate kinase 6	NME6	SDSVVSASREIAAFFPDFSEQRWYEEEEPQL	439	P	3	933		1	0.00550819	68.49	58.252	52.03	-1.0303	102790000	146	52.0301	1	1	NaN	61.181	68.49	NaN	NaN	NaN	NaN	NaN	1	61.1808	0.0141333	61.181	1	52.0301	0.0518424	52.03	NaN	NaN	NaN	NaN	NaN	NaN	NaN	NaN	NaN	NaN	NaN
O75414	159	O75414	O75414	Nucleoside diphosphate kinase 6	NME6	FFPDFSEQRWYEEEEPQLRCGPVCYSPEGGV	440	P	3	933		1	0.00550819	68.49	58.252	52.03	-1.0303	102790000	159	52.0301	1	1	NaN	61.181	68.49	NaN	NaN	NaN	NaN	NaN	1	61.1808	0.0141333	61.181	1	52.0301	0.0518424	52.03	NaN	NaN	NaN	NaN	NaN	NaN	NaN	NaN	NaN	NaN	NaN
O75431	73	O75431	O75431	Metaxin-2	MTX2	VCRANAEYMSPSGKVPFIHVGNQVVSELGPI	441	P	4	938	+	0.605047	4.91098e-05	87.719	82.91	87.719	0.12575	212350000	73	1.85244	0.52518	NaN	0.605047	40.986	NaN	87.719	NaN	NaN	NaN	NaN	0.52518	0.440481	0.0322815	40.986	NaN	NaN	NaN	NaN	NaN	NaN	NaN	NaN	NaN	NaN	NaN	NaN	NaN	NaN	NaN
O75431	150	O75431	O75431	Metaxin-2	MTX2	ATVGEITHARYGSPYPWPLNHILAYQKQWEV	442	P	3	938		0.991988	0.00205299	61.265	56.286	61.265	1.2399	71649000	150	20.7716	0.991988	NaN	NaN	61.265	NaN	NaN	0.991988	20.7716	0.00205299	61.265	NaN	NaN	NaN	NaN	NaN	NaN	NaN	NaN	NaN	NaN	NaN	NaN	NaN	NaN	NaN	NaN	NaN	NaN	NaN
O75431	152	O75431	O75431	Metaxin-2	MTX2	VGEITHARYGSPYPWPLNHILAYQKQWEVKR	443	P	3	938		0.965036	0.00205299	61.265	56.286	61.265	1.2399	71649000	152	14.3731	0.965036	NaN	NaN	61.265	NaN	NaN	0.965036	14.3731	0.00205299	61.265	NaN	NaN	NaN	NaN	NaN	NaN	NaN	NaN	NaN	NaN	NaN	NaN	NaN	NaN	NaN	NaN	NaN	NaN	NaN
O75436	221	O75436	O75436	Vacuolar protein sorting-associated protein 26A	VPS26A	HMELQLIKKEITGIGPSTTTETETIAKYEIM	444	P	3	939		0.85542	9.48728e-05	78.588	69.207	78.588	1.8248	10325000	221	7.92196	NaN	0.85542	NaN	NaN	78.588	NaN	NaN	NaN	NaN	NaN	NaN	NaN	NaN	NaN	NaN	NaN	NaN	NaN	NaN	NaN	NaN	NaN	NaN	NaN	NaN	NaN	NaN	NaN	NaN
O75436	257	O75436	O75436	Vacuolar protein sorting-associated protein 26A	VPS26A	KGESIPIRLFLAGYDPTPTMRDVNKKFSVRY	445	P	4	939		0.483282	0.000688763	51.296	51.296	51.296	-0.8475	0	257	1.06692	NaN	0.483282	NaN	NaN	51.296	NaN	NaN	NaN	NaN	NaN	NaN	NaN	NaN	NaN	NaN	NaN	NaN	NaN	NaN	NaN	NaN	NaN	NaN	NaN	NaN	NaN	NaN	NaN	NaN
O75448	432	O75448	O75448	Mediator of RNA polymerase II transcription subunit 24	MED24	VTNILKTMDADHSKSPEGLLGVLGHMLSGKS	446	P	5	944		1	0.000405263	68.375	61.799	49.287	0.16956	147690000	432	49.2868	1	1	1	59.356	58.974	68.375	0	0	NaN	NaN	1	59.3561	0.00112508	59.356	NaN	NaN	NaN	NaN	1	49.2868	0.00471049	49.287	NaN	NaN	NaN	NaN	NaN	NaN	NaN
O75449	228	O75449	O75449	Katanin p60 ATPase-containing subunit A1	KATNA1	DLVEAKKLLKEAVVLPMWMPEFFKGIRRPWK	447	P	2	945		0.988072	0.00532048	87.568	87.568	87.568	-0.24487	53980000	228	19.2124	NaN	NaN	0.988072	NaN	NaN	87.568	NaN	NaN	NaN	NaN	NaN	NaN	NaN	NaN	NaN	NaN	NaN	NaN	NaN	NaN	NaN	NaN	NaN	NaN	NaN	NaN	NaN	NaN	NaN
O75460	857	O75460	O75460	Serine/threonine-protein kinase/endoribonuclease IRE1;Serine/threonine-protein kinase;Endoribonuclease	ERN1	FQDVSDRIEKESLDGPIVKQLERGGRAVVKM	448	P	4	946		1	0.00656769	70.412	29.86	49.929	-0.97364	233080000	857	49.9289	1	1	NaN	49.929	70.412	NaN	NaN	NaN	NaN	NaN	NaN	NaN	NaN	NaN	0	0	NaN	NaN	1	49.9289	0.0499552	49.929	NaN	NaN	NaN	NaN	NaN	NaN	NaN
O75489	238	O75489	O75489	NADH dehydrogenase [ubiquinone] iron-sulfur protein 3, mitochondrial	NDUFS3	PVELAQEFRKFDLNSPWEAFPVYRQPPESLK	449	P	4	956		0.999975	0.00484976	58.272	48.417	58.272	-0.32545	241490000	238	46.069	0.999975	NaN	NaN	58.272	NaN	NaN	0.995032	22.9085	0.0371941	46.132	0.999975	46.069	0.00484976	58.272	NaN	NaN	NaN	NaN	NaN	NaN	NaN	NaN	NaN	NaN	NaN	NaN	NaN	NaN	NaN
O75489	243	O75489	O75489	NADH dehydrogenase [ubiquinone] iron-sulfur protein 3, mitochondrial	NDUFS3	QEFRKFDLNSPWEAFPVYRQPPESLKLEAGD	450	P	4	956		0.998963	0.00484976	58.272	48.417	58.272	-0.32545	241490000	243	29.8375	0.998963	NaN	NaN	58.272	NaN	NaN	0.975601	15.9968	0.0371941	46.132	0.998963	29.8375	0.00484976	58.272	NaN	NaN	NaN	NaN	NaN	NaN	NaN	NaN	NaN	NaN	NaN	NaN	NaN	NaN	NaN
O75525	7	O75525	O75525	KH domain-containing, RNA-binding, signal transduction-associated protein 3	KHDRBS3	_________MEEKYLPELMAEKDSLDPSFTH	451	P	4	962		0.999837	0.000617485	55.67	53.294	55.67	-0.082728	305670000	7	37.8757	0.999837	NaN	NaN	55.67	NaN	NaN	NaN	NaN	NaN	NaN	0.999837	37.8757	0.000617485	55.67	NaN	NaN	NaN	NaN	NaN	NaN	NaN	NaN	NaN	NaN	NaN	NaN	NaN	NaN	NaN
O75531	14	O75531	O75531	Barrier-to-autointegration factor;Barrier-to-autointegration factor, N-terminally processed	BANF1	__MTTSQKHRDFVAEPMGEKPVGSLAGIGEV	452	P	3	966		0.999087	3.35512e-25	167.05	139.37	108.32	0.43873	4380500000	14	30.3925	0.993845	0.995953	0.999087	142.39	167.05	145.55	NaN	NaN	NaN	NaN	0.9594	13.7348	0.00260323	105.39	0.966162	14.5564	1.23854e-11	142.39	0.993845	22.0808	0.00121492	85.982	NaN	NaN	NaN	NaN	NaN	NaN	NaN
O75531	19	O75531	O75531	Barrier-to-autointegration factor;Barrier-to-autointegration factor, N-terminally processed	BANF1	SQKHRDFVAEPMGEKPVGSLAGIGEVLGKKL	453	P	4	966		0.911834	0.000231485	80.359	73.925	80.359	-0.17847	1213400000	19	10.1461	NaN	0.911834	NaN	NaN	80.359	NaN	NaN	NaN	NaN	NaN	NaN	NaN	NaN	NaN	NaN	NaN	NaN	NaN	NaN	NaN	NaN	NaN	NaN	NaN	NaN	NaN	NaN	NaN	NaN
O75533	615	O75533	O75533	Splicing factor 3B subunit 1	SF3B1	LAKAAGLATMISTMRPDIDNMDEYVRNTTAR	454	P	3	967		1	1.24576e-19	160.48	143.54	42.172	-0.41067	507750000	615	42.1722	1	1	1	80.303	160.48	80.303	1	72.6443	0.000117823	72.644	1	52.0301	0.000321302	64.422	1	76.588	3.43833e-05	80.303	1	42.1722	0.0450255	42.172	NaN	NaN	NaN	NaN	NaN	NaN	NaN
O75533	780	O75533	O75533	Splicing factor 3B subunit 1	SF3B1	YTREVMLILIREFQSPDEEMKKIVLKVVKQC	455	P	3	967		1	0.0013704	88.551	68.998	88.551	-3.5039	0	780	88.5507	NaN	NaN	1	NaN	NaN	88.551	NaN	NaN	NaN	NaN	NaN	NaN	NaN	NaN	NaN	NaN	NaN	NaN	NaN	NaN	NaN	NaN	NaN	NaN	NaN	NaN	NaN	NaN	NaN
O75533	256	O75533	O75533	Splicing factor 3B subunit 1	SF3B1	GSETPGATPGSKIWDPTPSHTPAGAATPGRG	456	P	6	967		0.962213	4.74354e-07	78.228	72.908	78.228	-0.65815	163440000	256	13.9103	0.962213	0.930065	NaN	78.228	53.288	NaN	0.950406	14.018	0.000142733	42.038	0.962213	13.9103	4.74354e-07	78.228	0	0	NaN	NaN	NaN	NaN	NaN	NaN	NaN	NaN	NaN	NaN	NaN	NaN	NaN
O75533	258	O75533	O75533	Splicing factor 3B subunit 1	SF3B1	ETPGATPGSKIWDPTPSHTPAGAATPGRGDT	457	P	6	967		0.962213	4.74354e-07	78.228	72.908	78.228	-0.65815	163440000	258	13.9103	0.962213	0.92517	NaN	78.228	53.288	NaN	0.950406	14.018	0.000142733	42.038	0.962213	13.9103	4.74354e-07	78.228	0	0	NaN	NaN	NaN	NaN	NaN	NaN	NaN	NaN	NaN	NaN	NaN	NaN	NaN
O75533	437	O75533	O75533	Splicing factor 3B subunit 1	SF3B1	VPIRTPARKLTATPTPLGGMTGFHMQTEDRT	458	P	2	967		0.998832	7.72413e-08	126.77	107.03	126.77	0.59003	451450000	437	29.3203	0.998832	0.989335	0.99774	126.77	95.122	99.11	NaN	NaN	NaN	NaN	0.998832	29.3203	7.72413e-08	126.77	NaN	NaN	NaN	NaN	0.973478	15.6472	0.0190632	83.692	NaN	NaN	NaN	NaN	NaN	NaN	NaN
O75533	363	O75533	O75533	Splicing factor 3B subunit 1	SF3B1	GSTPVLTPGKTPIGTPAMNMATPTPGHIMSM	459	P	4	967		0.883411	2.27369e-05	60.728	60.728	40.544	0.68034	170200000	363	10.9043	NaN	0.570746	0.883411	NaN	57.097	60.728	NaN	NaN	NaN	NaN	NaN	NaN	NaN	NaN	NaN	NaN	NaN	NaN	NaN	NaN	NaN	NaN	NaN	NaN	NaN	NaN	NaN	NaN	NaN
O75533	380	O75533	O75533	Splicing factor 3B subunit 1	SF3B1	MNMATPTPGHIMSMTPEQLQAWRWEREIDER	460	P	4	967		0.750848	1.17004e-05	60.641	60.641	60.641	0.5652	56648000	380	2.14339	NaN	0.750848	0	NaN	60.641	NaN	NaN	NaN	NaN	NaN	NaN	NaN	NaN	NaN	NaN	NaN	NaN	NaN	NaN	NaN	NaN	NaN	NaN	NaN	NaN	NaN	NaN	NaN	NaN
O75534	672	O75534	O75534	Cold shock domain-containing protein E1	CSDE1	CVLGQNAQTMAYNITPLRRATVECVKDQFGF	461	P	3	968		1	0.000107321	90.22	81.544	72.568	-0.61493	288820000	672	72.5683	NaN	1	NaN	NaN	90.22	NaN	NaN	NaN	NaN	NaN	NaN	NaN	NaN	NaN	NaN	NaN	NaN	NaN	NaN	NaN	NaN	NaN	NaN	NaN	NaN	NaN	NaN	NaN	NaN
O75534	397	O75534	O75534	Cold shock domain-containing protein E1	CSDE1	GNQLHIADEVEFTVVPDMLSAQRNHAIRIKK	462	P	3	968		1	7.72722e-10	124.66	120.21	124.66	-0.37543	100060000	397	124.658	NaN	NaN	1	NaN	NaN	124.66	NaN	NaN	NaN	NaN	NaN	NaN	NaN	NaN	NaN	NaN	NaN	NaN	NaN	NaN	NaN	NaN	NaN	NaN	NaN	NaN	NaN	NaN	NaN
O75534	610	O75534	O75534	Cold shock domain-containing protein E1	CSDE1	TIYSGKVIRPLRSVDPTQTEYQGMIEIVEEG	463	P	3	968		1	0.000201578	73.315	71.794	73.315	-1.085	42222000	610	73.3147	1	NaN	1	63.184	NaN	73.315	NaN	NaN	NaN	NaN	0	0	NaN	NaN	NaN	NaN	NaN	NaN	NaN	NaN	NaN	NaN	1	63.1836	0.000758622	63.184	NaN	NaN	NaN
O75592	837	O75592	O75592	E3 ubiquitin-protein ligase MYCBP2	MYCBP2	EARQRGILDAVKEMIPLDLLLAVPVPGVNIE	464	P	4	978		0.999971	5.13006e-05	65.275	63.221	65.275	4.3847	27606000	837	45.5822	NaN	0.999971	NaN	NaN	65.275	NaN	NaN	NaN	NaN	NaN	NaN	NaN	NaN	NaN	NaN	NaN	NaN	NaN	NaN	NaN	NaN	NaN	NaN	NaN	NaN	NaN	NaN	NaN	NaN
O75600	347	O75600	O75600	2-amino-3-ketobutyrate coenzyme A ligase, mitochondrial	GCAT	SKMEAAGFTISGASHPICPVMLGDARLASRM	465	P	3	979		0.641129	0.000159954	74.047	71.435	74.047	-0.27591	43367000	347	2.52007	NaN	0.641129	NaN	NaN	74.047	NaN	NaN	NaN	NaN	NaN	NaN	NaN	NaN	NaN	NaN	NaN	NaN	NaN	NaN	NaN	NaN	NaN	NaN	NaN	NaN	NaN	NaN	NaN	NaN
O75600	350	O75600	O75600	2-amino-3-ketobutyrate coenzyme A ligase, mitochondrial	GCAT	EAAGFTISGASHPICPVMLGDARLASRMADD	466	P	3	979		0.995834	5.33055e-06	106.63	88.539	106.63	-1.2152	225050000	350	23.7844	0.953514	0.995834	0.912156	91.729	106.63	89.511	NaN	NaN	NaN	NaN	0.950825	12.8661	0.00372798	50.426	0.953514	13.1201	6.22301e-06	91.729	NaN	NaN	NaN	NaN	NaN	NaN	NaN	NaN	NaN	NaN	NaN
O75607	31	O75607	O75607	Nucleoplasmin-3	NPM3	SRTRAGGVGGLRVPAPVTMDSFFFGCELSGH	467	P	4	980		0.99024	6.12829e-05	88.014	81.854	88.014	-0.58035	724650000	31	20.0631	0.958543	0.99024	0.779903	63.085	88.014	49.486	NaN	NaN	NaN	NaN	NaN	NaN	NaN	NaN	0.958543	13.6401	6.12829e-05	63.085	NaN	NaN	NaN	NaN	NaN	NaN	NaN	NaN	NaN	NaN	NaN
O75607	107	O75607	O75607	Nucleoplasmin-3	NPM3	QEIAVPVANLKLSCQPMLSLDDFQLQPPVTF	468	P	2	980		1	4.93757e-14	152.94	131.84	152.94	-0.29072	839840000	107	113.958	1	1	1	152.94	121.82	113.69	NaN	NaN	NaN	NaN	0	0	NaN	NaN	1	113.958	4.93757e-14	152.94	NaN	NaN	NaN	NaN	NaN	NaN	NaN	NaN	NaN	NaN	NaN
O75643	504	O75643	O75643	U5 small nuclear ribonucleoprotein 200 kDa helicase	SNRNP200	YRAALETDENLLLCAPTGAGKTNVALMCMLR	469	P	2	985		1	0.000137846	123.26	115.15	110.58	-2.4188	82143000	504	110.582	NaN	1	NaN	NaN	123.26	NaN	NaN	NaN	NaN	NaN	NaN	NaN	NaN	NaN	NaN	NaN	NaN	NaN	NaN	NaN	NaN	NaN	NaN	NaN	NaN	NaN	NaN	NaN	NaN
O75643	590	O75643	O75643	U5 small nuclear ribonucleoprotein 200 kDa helicase	SNRNP200	LCKEEISATQIIVCTPEKWDIITRKGGERTY	470	P	2	985		1	0.0115536	118.23	98.471	118.23	-0.29766	53653000	590	118.233	1	NaN	NaN	118.23	NaN	NaN	NaN	NaN	NaN	NaN	NaN	NaN	NaN	NaN	NaN	NaN	NaN	NaN	NaN	NaN	NaN	NaN	1	118.233	0.0115536	118.23	NaN	NaN	NaN
O75643	543	O75643	O75643	U5 small nuclear ribonucleoprotein 200 kDa helicase	SNRNP200	DGTINVDDFKIIYIAPMRSLVQEMVGSFGKR	471	P	5	985		1	4.22977e-05	84.318	77.595	84.318	1.3287	162910000	543	84.3184	NaN	1	1	NaN	72.227	84.318	NaN	NaN	NaN	NaN	NaN	NaN	NaN	NaN	NaN	NaN	NaN	NaN	NaN	NaN	NaN	NaN	NaN	NaN	NaN	NaN	NaN	NaN	NaN
O75643	898	O75643	O75643	U5 small nuclear ribonucleoprotein 200 kDa helicase	SNRNP200	LNQQLPIESQMVSKLPDMLNAEIVLGNVQNA	472	P	2	985		1	0.000224777	111.79	106.19	111.79	-0.2886	90080000	898	111.793	NaN	1	1	NaN	95.197	111.79	NaN	NaN	NaN	NaN	NaN	NaN	NaN	NaN	NaN	NaN	NaN	NaN	NaN	NaN	NaN	NaN	NaN	NaN	NaN	NaN	NaN	NaN	NaN
O75643	1626	O75643	O75643	U5 small nuclear ribonucleoprotein 200 kDa helicase	SNRNP200	ETLLNGVGYLHEGLSPMERRLVEQLFSSGAI	473	P	5	985		1	0.00133477	55.662	49.567	51.963	0.74641	113880000	1626	51.9626	1	1	1	45.07	51.963	55.662	1	45.0702	0.00651135	45.07	NaN	NaN	NaN	NaN	NaN	NaN	NaN	NaN	NaN	NaN	NaN	NaN	NaN	NaN	NaN	NaN	NaN	NaN	NaN
O75643	354	O75643	O75643	U5 small nuclear ribonucleoprotein 200 kDa helicase	SNRNP200	SEAEKERIMGKMEADPELSKFLYQLHETEKE	474	P	4	985		1	0.00354224	50.851	44.202	50.851	-0.26375	44677000	354	50.8512	NaN	NaN	1	NaN	NaN	50.851	NaN	NaN	NaN	NaN	NaN	NaN	NaN	NaN	NaN	NaN	NaN	NaN	NaN	NaN	NaN	NaN	NaN	NaN	NaN	NaN	NaN	NaN	NaN
O75643	933	O75643	O75643	U5 small nuclear ribonucleoprotein 200 kDa helicase	SNRNP200	NWLGYAYLYIRMLRSPTLYGISHDDLKGDPL	475	P	4	985		1	9.17552e-12	131.56	124.61	131.56	0.61811	696180000	933	105.959	1	1	1	102.21	113.6	131.56	NaN	NaN	NaN	NaN	1	95.8421	9.17552e-12	102.21	NaN	NaN	NaN	NaN	NaN	NaN	NaN	NaN	NaN	NaN	NaN	NaN	NaN	NaN	NaN
O75663	43	O75663	O75663	TIP41-like protein	TIPRL	MKSADVEKLADELHMPSLPEMMFGDNVLRIQ	476	P	4	987		0.545194	0.002561	54.141	54.141	49.888	-2.3249	48046000	43	0.787254	NaN	0.533441	0.545194	NaN	54.141	49.888	NaN	NaN	NaN	NaN	NaN	NaN	NaN	NaN	NaN	NaN	NaN	NaN	NaN	NaN	NaN	NaN	NaN	NaN	NaN	NaN	NaN	NaN	NaN
O75663	46	O75663	O75663	TIP41-like protein	TIPRL	ADVEKLADELHMPSLPEMMFGDNVLRIQHGS	477	P	3	987		0.999748	8.80195e-08	123.53	123.53	123.53	-0.50505	820130000	46	36.189	0.997955	0.999073	0.999748	72.881	90.974	123.53	NaN	NaN	NaN	NaN	0.997955	26.885	0.00031332	72.881	NaN	NaN	NaN	NaN	NaN	NaN	NaN	NaN	NaN	NaN	NaN	NaN	NaN	NaN	NaN
O75691	457	O75691	O75691	Small subunit processome component 20 homolog	UTP20	ALAILAKLILNKAAPPTAGSMAIEKYPLVFS	478	P	3	994		0.896314	0.0101884	54.152	48.311	54.152	-0.4622	95894000	457	12.2132	NaN	0.896314	0	NaN	54.152	NaN	NaN	NaN	NaN	NaN	NaN	NaN	NaN	NaN	NaN	NaN	NaN	NaN	NaN	NaN	NaN	NaN	NaN	NaN	NaN	NaN	NaN	NaN	NaN
O75691	473	O75691	O75691	Small subunit processome component 20 homolog	UTP20	TAGSMAIEKYPLVFSPQMVGFYIKQKKTRSK	479	P	2	994		1	0.00228692	126.19	105.86	126.19	-0.7245	151360000	473	96.65	NaN	1	0.799821	NaN	126.19	51.22	NaN	NaN	NaN	NaN	NaN	NaN	NaN	NaN	NaN	NaN	NaN	NaN	NaN	NaN	NaN	NaN	NaN	NaN	NaN	NaN	NaN	NaN	NaN
O75691	661	O75691	O75691	Small subunit processome component 20 homolog	UTP20	RLLTIRILNHFDVQLPESMEDDGLSERQSVF	480	P	2	994		1	0.00263028	85.734	72.597	85.734	-1.4138	11681000	661	85.7338	1	NaN	NaN	85.734	NaN	NaN	NaN	NaN	NaN	NaN	NaN	NaN	NaN	NaN	1	85.7338	0.00263028	85.734	NaN	NaN	NaN	NaN	NaN	NaN	NaN	NaN	NaN	NaN	NaN
O75694	990	O75694	O75694	Nuclear pore complex protein Nup155	NUP155	ITDTLQELVNQSKAAPQSPSVPKKPGPPVLS	481	P	5	995		0.806473	0.00116663	43.831	39.91	43.831	-2.5815	32419000	990	0	NaN	NaN	0.806473	NaN	NaN	43.831	NaN	NaN	NaN	NaN	NaN	NaN	NaN	NaN	NaN	NaN	NaN	NaN	NaN	NaN	NaN	NaN	NaN	NaN	NaN	NaN	NaN	NaN	NaN
O75694	993	O75694	O75694	Nuclear pore complex protein Nup155	NUP155	TLQELVNQSKAAPQSPSVPKKPGPPVLSSDP	482	P	5	995		0.806473	0.00116663	43.831	39.91	43.831	-2.5815	32419000	993	0	NaN	NaN	0.806473	NaN	NaN	43.831	NaN	NaN	NaN	NaN	NaN	NaN	NaN	NaN	NaN	NaN	NaN	NaN	NaN	NaN	NaN	NaN	NaN	NaN	NaN	NaN	NaN	NaN	NaN
O75694	996	O75694	O75694	Nuclear pore complex protein Nup155	NUP155	ELVNQSKAAPQSPSVPKKPGPPVLSSDPNML	483	P	5	995		0.806473	0.00116663	43.831	39.91	43.831	-2.5815	32419000	996	0	NaN	NaN	0.806473	NaN	NaN	43.831	NaN	NaN	NaN	NaN	NaN	NaN	NaN	NaN	NaN	NaN	NaN	NaN	NaN	NaN	NaN	NaN	NaN	NaN	NaN	NaN	NaN	NaN	NaN
O75694	999	O75694	O75694	Nuclear pore complex protein Nup155	NUP155	NQSKAAPQSPSVPKKPGPPVLSSDPNMLSNE	484	P	5	995		0.806473	0.00116663	43.831	39.91	43.831	-2.5815	32419000	999	0	NaN	NaN	0.806473	NaN	NaN	43.831	NaN	NaN	NaN	NaN	NaN	NaN	NaN	NaN	NaN	NaN	NaN	NaN	NaN	NaN	NaN	NaN	NaN	NaN	NaN	NaN	NaN	NaN	NaN
O75694	1001	O75694	O75694	Nuclear pore complex protein Nup155	NUP155	SKAAPQSPSVPKKPGPPVLSSDPNMLSNEEA	485	P	5	995		0.806473	0.00116663	43.831	39.91	43.831	-2.5815	32419000	1001	0	NaN	NaN	0.806473	NaN	NaN	43.831	NaN	NaN	NaN	NaN	NaN	NaN	NaN	NaN	NaN	NaN	NaN	NaN	NaN	NaN	NaN	NaN	NaN	NaN	NaN	NaN	NaN	NaN	NaN
O75694	1002	O75694	O75694	Nuclear pore complex protein Nup155	NUP155	KAAPQSPSVPKKPGPPVLSSDPNMLSNEEAG	486	P	5	995		0.806473	0.00116663	43.831	39.91	43.831	-2.5815	32419000	1002	0	NaN	NaN	0.806473	NaN	NaN	43.831	NaN	NaN	NaN	NaN	NaN	NaN	NaN	NaN	NaN	NaN	NaN	NaN	NaN	NaN	NaN	NaN	NaN	NaN	NaN	NaN	NaN	NaN	NaN
O75694	1008	O75694	O75694	Nuclear pore complex protein Nup155	NUP155	PSVPKKPGPPVLSSDPNMLSNEEAGHHFEQM	487	P	4	995		0.992447	0.000392055	58.858	52.494	58.858	0.28427	66116000	1008	22.9345	NaN	NaN	0.992447	NaN	NaN	58.858	NaN	NaN	NaN	NaN	NaN	NaN	NaN	NaN	NaN	NaN	NaN	NaN	NaN	NaN	NaN	NaN	NaN	NaN	NaN	NaN	NaN	NaN	NaN
O75694	497	O75694	O75694	Nuclear pore complex protein Nup155	NUP155	PITDSPVVVQQHMLPPKKFVLLSAQGSLMFH	488	P	5	995		0.534528	7.38969e-05	80.07	76.783	78.837	0.17007	49548000	497	0.601444	0.534528	NaN	NaN	80.07	NaN	NaN	NaN	NaN	NaN	NaN	NaN	NaN	NaN	NaN	0.534528	0.601444	7.38969e-05	78.837	NaN	NaN	NaN	NaN	0.528017	0.525378	0.00019842	80.07	0.517767	0.376149	0.00917846
O75694	90	O75694	O75694	Nuclear pore complex protein Nup155	NUP155	VPNLPEISSIRRVPLPPELVEQFGHMQCNCM	489	P	3	995		0.993174	0.00136342	47.018	47.018	47.018	-0.9841	16403000	90	24.7049	NaN	0.993174	NaN	NaN	47.018	NaN	NaN	NaN	NaN	NaN	NaN	NaN	NaN	NaN	NaN	NaN	NaN	NaN	NaN	NaN	NaN	NaN	NaN	NaN	NaN	NaN	NaN	NaN	NaN
O75694	91	O75694	O75694	Nuclear pore complex protein Nup155	NUP155	PNLPEISSIRRVPLPPELVEQFGHMQCNCMM	490	P	3	995		0.996405	0.00136342	47.018	47.018	47.018	-0.9841	16403000	91	27.3632	NaN	0.996405	NaN	NaN	47.018	NaN	NaN	NaN	NaN	NaN	NaN	NaN	NaN	NaN	NaN	NaN	NaN	NaN	NaN	NaN	NaN	NaN	NaN	NaN	NaN	NaN	NaN	NaN	NaN
O75717	424	O75717	O75717	WD repeat and HMG-box DNA-binding protein 1	WDHD1	HNLPLVTSQRPFYDGPMPTPRQKPFQSGSTP	491	P	5	998		0.855219	2.73212e-10	116.73	109.24	116.73	0.56551	279550000	424	8.62052	0.660873	0.855219	0.720266	54.994	116.73	104.35	NaN	NaN	NaN	NaN	0.660873	6.36687	4.23334e-07	54.994	NaN	NaN	NaN	NaN	NaN	NaN	NaN	NaN	NaN	NaN	NaN	NaN	NaN	NaN	NaN
O75717	426	O75717	O75717	WD repeat and HMG-box DNA-binding protein 1	WDHD1	LPLVTSQRPFYDGPMPTPRQKPFQSGSTPLH	492	P	4	998		0.334856	0.00321726	42.59	38.438	42.59	2.0547	0	426	0.4688	0.334856	0	0	42.59	NaN	NaN	NaN	NaN	NaN	NaN	NaN	NaN	NaN	NaN	NaN	NaN	NaN	NaN	NaN	NaN	NaN	NaN	NaN	NaN	NaN	NaN	0.334856	0.4688	0.00321726
O75717	428	O75717	O75717	WD repeat and HMG-box DNA-binding protein 1	WDHD1	LVTSQRPFYDGPMPTPRQKPFQSGSTPLHLT	493	P	4	998		0.30695	0.000616689	42.269	34.952	42.269	-0.23708	0	428	0.253394	0.30695	0	0	42.269	NaN	NaN	NaN	NaN	NaN	NaN	0.30695	0.253394	0.000616689	42.269	NaN	NaN	NaN	NaN	NaN	NaN	NaN	NaN	NaN	NaN	NaN	NaN	NaN	NaN	NaN
O75717	370	O75717	O75717	WD repeat and HMG-box DNA-binding protein 1	WDHD1	NDDEDDEDLMMASGRPRQRSHILEDDENSVD	494	P	3	998		1	0.00720446	58.997	56.031	58.997	-0.34471	115420000	370	58.9971	NaN	NaN	1	NaN	NaN	58.997	NaN	NaN	NaN	NaN	NaN	NaN	NaN	NaN	NaN	NaN	NaN	NaN	NaN	NaN	NaN	NaN	NaN	NaN	NaN	NaN	NaN	NaN	NaN
O75717	923	O75717	O75717	WD repeat and HMG-box DNA-binding protein 1	WDHD1	QGRVNPFKVSASSKEPAMSMNSARSTNILDN	495	P	3	998		1	0.00206389	62.055	44.255	62.055	-0.10124	0	923	62.0552	NaN	NaN	1	NaN	NaN	62.055	NaN	NaN	NaN	NaN	NaN	NaN	NaN	NaN	NaN	NaN	NaN	NaN	NaN	NaN	NaN	NaN	NaN	NaN	NaN	NaN	NaN	NaN	NaN
O75718	176	O75718	O75718	Cartilage-associated protein	CRTAP	LPKAIAAAHTFLLKHPDDEMMKRNMAYYKSL	496	P	4	999		1	1.54419e-06	119.38	116.4	51.348	-0.31358	1639600000	176	51.3476	1	1	1	69.188	119.38	65.951	NaN	NaN	NaN	NaN	1	43.5343	0.0492862	43.534	1	47.0473	0.0033193	69.188	NaN	NaN	NaN	NaN	NaN	NaN	NaN	NaN	NaN	NaN	NaN
O75746	36	O75746	O75746	Calcium-binding mitochondrial carrier protein Aralar1	SLC25A12	LQYASTEVDGERYMTPEDFVQRYLGLYNDPN	497	P	3	1000		1	3.95646e-05	110.72	94.378	99.686	0.52455	110160000	36	99.6856	1	NaN	NaN	110.72	NaN	NaN	1	110.715	3.95646e-05	110.72	NaN	NaN	NaN	NaN	1	99.6856	0.000239026	99.686	NaN	NaN	NaN	NaN	NaN	NaN	NaN	NaN	NaN	NaN	NaN
O75781	115	O75781	O75781	Paralemmin-1	PALM	RGDSAPATAKENAAAPSPVRAPAPSPAKEER	498	P	3	1002		1	0.00657378	47.75	38.654	47.75	-2.2361	16089000	115	47.75	1	NaN	NaN	47.75	NaN	NaN	1	47.75	0.00657378	47.75	NaN	NaN	NaN	NaN	NaN	NaN	NaN	NaN	NaN	NaN	NaN	NaN	NaN	NaN	NaN	NaN	NaN	NaN	NaN
O75781	117	O75781	O75781	Paralemmin-1	PALM	DSAPATAKENAAAPSPVRAPAPSPAKEERKT	499	P	3	1002		1	0.00657378	47.75	38.654	47.75	-2.2361	16089000	117	47.75	1	NaN	NaN	47.75	NaN	NaN	1	47.75	0.00657378	47.75	NaN	NaN	NaN	NaN	NaN	NaN	NaN	NaN	NaN	NaN	NaN	NaN	NaN	NaN	NaN	NaN	NaN	NaN	NaN
O75781	121	O75781	O75781	Paralemmin-1	PALM	ATAKENAAAPSPVRAPAPSPAKEERKTEVVM	500	P	3	1002		1	0.00657378	47.75	38.654	47.75	-2.2361	16089000	121	47.75	1	NaN	NaN	47.75	NaN	NaN	1	47.75	0.00657378	47.75	NaN	NaN	NaN	NaN	NaN	NaN	NaN	NaN	NaN	NaN	NaN	NaN	NaN	NaN	NaN	NaN	NaN	NaN	NaN
O75781	123	O75781	O75781	Paralemmin-1	PALM	AKENAAAPSPVRAPAPSPAKEERKTEVVMNS	501	P	3	1002		1	0.00657378	47.75	38.654	47.75	-2.2361	16089000	123	47.75	1	NaN	NaN	47.75	NaN	NaN	1	47.75	0.00657378	47.75	NaN	NaN	NaN	NaN	NaN	NaN	NaN	NaN	NaN	NaN	NaN	NaN	NaN	NaN	NaN	NaN	NaN	NaN	NaN
O75781	125	O75781	O75781	Paralemmin-1	PALM	ENAAAPSPVRAPAPSPAKEERKTEVVMNSQQ	502	P	3	1002		1	0.00657378	47.75	38.654	47.75	-2.2361	16089000	125	47.75	1	NaN	NaN	47.75	NaN	NaN	1	47.75	0.00657378	47.75	NaN	NaN	NaN	NaN	NaN	NaN	NaN	NaN	NaN	NaN	NaN	NaN	NaN	NaN	NaN	NaN	NaN	NaN	NaN
O75820	4	O75820	O75820	Zinc finger protein 189	ZNF189	____________MASPSPPPESKGLLTFEDV	503	P	2	1009		0.711381	0.0124396	59.597	17.309	54.722	0.43625	83547000	4	3.91778	0.711381	0.5	0.533034	54.722	59.597	58.433	NaN	NaN	NaN	NaN	NaN	NaN	NaN	NaN	0.711381	3.91778	0.0566061	54.722	NaN	NaN	NaN	NaN	NaN	NaN	NaN	NaN	NaN	NaN	NaN
O75820	6	O75820	O75820	Zinc finger protein 189	ZNF189	__________MASPSPPPESKGLLTFEDVAV	504	P	2	1009		0.5	0.0124396	59.597	17.309	59.597	1.0263	29765000	6	0	0.42954	0.5	0.488989	54.722	59.597	58.433	NaN	NaN	NaN	NaN	NaN	NaN	NaN	NaN	0.42954	0	0.0566061	54.722	NaN	NaN	NaN	NaN	NaN	NaN	NaN	NaN	NaN	NaN	NaN
O75820	7	O75820	O75820	Zinc finger protein 189	ZNF189	_________MASPSPPPESKGLLTFEDVAVF	505	P	2	1009		0.5	0.0124396	59.597	17.309	59.597	1.0263	29765000	7	0	0.42954	0.5	0.488989	54.722	59.597	58.433	NaN	NaN	NaN	NaN	NaN	NaN	NaN	NaN	0.42954	0	0.0566061	54.722	NaN	NaN	NaN	NaN	NaN	NaN	NaN	NaN	NaN	NaN	NaN
O75820	8	O75820	O75820	Zinc finger protein 189	ZNF189	________MASPSPPPESKGLLTFEDVAVFF	506	P	2	1009		0.5	0.0124396	59.597	17.309	59.597	1.0263	29765000	8	0	0.42954	0.5	0.488989	54.722	59.597	58.433	NaN	NaN	NaN	NaN	NaN	NaN	NaN	NaN	0.42954	0	0.0566061	54.722	NaN	NaN	NaN	NaN	NaN	NaN	NaN	NaN	NaN	NaN	NaN
O75821	2	O75821	O75821	Eukaryotic translation initiation factor 3 subunit G	EIF3G	______________MPTGDFDSKPSWADQVE	507	P	4	1010		1	3.4241e-05	81.967	77.11	68.733	0.27767	713920000	2	68.7332	1	1	NaN	81.967	52.268	NaN	1	49.088	0.023063	49.088	1	81.967	0.000487094	81.967	NaN	NaN	NaN	NaN	1	68.7332	3.4241e-05	68.733	NaN	NaN	NaN	NaN	NaN	NaN	NaN
O75821	10	O75821	O75821	Eukaryotic translation initiation factor 3 subunit G	EIF3G	______MPTGDFDSKPSWADQVEEEGEDDKC	508	P	4	1010		1	2.79036e-05	92.238	90.483	68.733	0.27767	721430000	10	68.7332	1	1	NaN	81.967	92.238	NaN	1	49.088	0.023063	49.088	1	81.967	0.000487094	81.967	NaN	NaN	NaN	NaN	1	68.7332	2.79036e-05	68.733	NaN	NaN	NaN	NaN	NaN	NaN	NaN
O75822	150	O75822	O75822	Eukaryotic translation initiation factor 3 subunit J	EIF3J	TFGVNNAVYGIDAMNPSSRDDFTEFGKLLKD	509	P	4	1011		1	6.2756e-08	103.94	96.681	103.94	-1.6233	89501000	150	103.939	1	NaN	NaN	103.94	NaN	NaN	1	103.939	6.2756e-08	103.94	NaN	NaN	NaN	NaN	NaN	NaN	NaN	NaN	NaN	NaN	NaN	NaN	NaN	NaN	NaN	NaN	NaN	NaN	NaN
O75832	109	O75832	O75832	26S proteasome non-ATPase regulatory subunit 10	PSMD10	GKGAQVNAVNQNGCTPLHYAASKNRHEIAVM	510	P	3	1013		1	0.00529943	57.009	39.414	49.768	-0.59114	309300000	109	49.7684	1	1	NaN	50.425	57.009	NaN	1	42.1233	0.0509696	42.123	NaN	NaN	NaN	NaN	1	50.4245	0.0107425	50.425	NaN	NaN	NaN	NaN	NaN	NaN	NaN	NaN	NaN	NaN	NaN
O75832	132	O75832	O75832	26S proteasome non-ATPase regulatory subunit 10	PSMD10	NRHEIAVMLLEGGANPDAKDHYEATAMHRAA	511	P	6	1013		1	4.78378e-05	79.762	75.657	43.31	0.23741	223090000	132	43.3098	1	1	1	43.31	77.925	79.762	NaN	NaN	NaN	NaN	NaN	NaN	NaN	NaN	NaN	NaN	NaN	NaN	1	43.3098	0.00196224	43.31	NaN	NaN	NaN	NaN	NaN	NaN	NaN
O75844	302	O75844	O75844	CAAX prenyl protease 1 homolog	ZMPSTE24	YSVLNKDIQEDSGMEPRNEEEGNSEEIKAKV	512	P	3	1016		1	2.11972e-19	157.28	143.87	122.27	-0.085382	505620000	302	122.266	1	NaN	1	122.27	NaN	157.28	NaN	NaN	NaN	NaN	NaN	NaN	NaN	NaN	1	122.266	1.39607e-05	122.27	NaN	NaN	NaN	NaN	NaN	NaN	NaN	NaN	NaN	NaN	NaN
O75844	460	O75844	O75844	CAAX prenyl protease 1 homolog	ZMPSTE24	FPVSDWLFSMWHYSHPPLLERLQALKTMKQH	513	P	5	1016		0.999993	9.11208e-05	63.803	54.716	63.803	-0.51911	70889000	460	51.3198	NaN	0.999993	NaN	NaN	63.803	NaN	NaN	NaN	NaN	NaN	NaN	NaN	NaN	NaN	NaN	NaN	NaN	NaN	NaN	NaN	NaN	NaN	NaN	NaN	NaN	NaN	NaN	NaN	NaN
O75844	461	O75844	O75844	CAAX prenyl protease 1 homolog	ZMPSTE24	PVSDWLFSMWHYSHPPLLERLQALKTMKQH_	514	P	5	1016		0.999983	9.11208e-05	63.803	54.716	63.803	-0.51911	70889000	461	47.6018	NaN	0.999983	NaN	NaN	63.803	NaN	NaN	NaN	NaN	NaN	NaN	NaN	NaN	NaN	NaN	NaN	NaN	NaN	NaN	NaN	NaN	NaN	NaN	NaN	NaN	NaN	NaN	NaN	NaN
O75880	90	O75880	O75880	Protein SCO1 homolog, mitochondrial	SCO1	PWSQKGPGDSTRPSKPGPVSWKSLAITFAIG	515	P	3	1022	+	0.995486	0.00992238	89.358	63.768	89.358	-0.34888	76814000	90	23.4151	0.995486	NaN	NaN	89.358	NaN	NaN	0.995486	23.4151	0.00992238	89.358	NaN	NaN	NaN	NaN	NaN	NaN	NaN	NaN	NaN	NaN	NaN	NaN	NaN	NaN	NaN	NaN	NaN	NaN	NaN
O75880	92	O75880	O75880	Protein SCO1 homolog, mitochondrial	SCO1	SQKGPGDSTRPSKPGPVSWKSLAITFAIGGA	516	P	3	1022	+	0.995486	0.00992238	89.358	63.768	89.358	-0.34888	76814000	92	23.4151	0.995486	NaN	NaN	89.358	NaN	NaN	0.995486	23.4151	0.00992238	89.358	NaN	NaN	NaN	NaN	NaN	NaN	NaN	NaN	NaN	NaN	NaN	NaN	NaN	NaN	NaN	NaN	NaN	NaN	NaN
O75886	124	O75886	O75886	Signal transducing adapter molecule 2	STAM2	LKSLMVEWSEEFQKDPQFSLISATIKSMKEE	517	P	3	1026		1	0.0320448	43.523	31.443	43.523	-3.4218	16797000	124	43.5231	1	NaN	NaN	43.523	NaN	NaN	NaN	NaN	NaN	NaN	NaN	NaN	NaN	NaN	1	43.5231	0.0320448	43.523	NaN	NaN	NaN	NaN	NaN	NaN	NaN	NaN	NaN	NaN	NaN
O75911	13	O75911	O75911	Short-chain dehydrogenase/reductase 3	DHRS3	___MVWKRLGALVMFPLQMIYLVVKAAVGLV	518	P	2	1032		1	0.00423413	78.655	73.577	58.592	1.3565	14647000	13	58.592	NaN	1	1	NaN	78.655	59.542	NaN	NaN	NaN	NaN	NaN	NaN	NaN	NaN	NaN	NaN	NaN	NaN	NaN	NaN	NaN	NaN	NaN	NaN	NaN	NaN	NaN	NaN	NaN
O75914;Q13153;Q13177	441;428;407	O75914;Q13153;Q13177	Q13177	Serine/threonine-protein kinase PAK 3;Serine/threonine-protein kinase PAK 1;Serine/threonine-protein kinase PAK 2;PAK-2p27;PAK-2p34	PAK3;PAK1;PAK2	QITPEQSKRSTMVGTPYWMAPEVVTRKAYGP	519	P	3	1033;3523;3529		1	0.000193899	77.644	63.981	47.752	0.0068296	753630000	407	47.7518	1	1	1	77.185	77.644	62.891	1	55.3137	0.0126146	57.802	1	62.454	0.00385286	62.454	1	77.1846	0.000193899	77.185	NaN	NaN	NaN	NaN	NaN	NaN	NaN	NaN	NaN	NaN	NaN
O75914;Q13153;Q13177	446;433;412	O75914;Q13153;Q13177	Q13177	Serine/threonine-protein kinase PAK 3;Serine/threonine-protein kinase PAK 1;Serine/threonine-protein kinase PAK 2;PAK-2p27;PAK-2p34	PAK3;PAK1;PAK2	QSKRSTMVGTPYWMAPEVVTRKAYGPKVDIW	520	P	3	1033;3523;3529		1	0.000193899	89.629	68.966	47.752	0.0068296	316230000	412	47.7518	1	1	1	77.185	89.629	62.891	1	55.3137	0.0126146	55.314	1	62.454	0.00385286	62.454	1	77.1846	0.000193899	77.185	NaN	NaN	NaN	NaN	NaN	NaN	NaN	NaN	NaN	NaN	NaN
O75915	7	O75915	O75915	PRA1 family protein 3	ARL6IP5	_________MDVNIAPLRAWDDFFPGSDRFA	521	P	3	1034		1	0.000939798	58.49	50.651	46.027	-0.034102	15402000	7	46.0267	NaN	NaN	1	NaN	NaN	58.49	NaN	NaN	NaN	NaN	NaN	NaN	NaN	NaN	NaN	NaN	NaN	NaN	NaN	NaN	NaN	NaN	NaN	NaN	NaN	NaN	NaN	NaN	NaN
O75915	16	O75915	O75915	PRA1 family protein 3	ARL6IP5	MDVNIAPLRAWDDFFPGSDRFARPDFRDISK	522	P	3	1034		1	0.000939798	58.49	50.651	46.027	-0.034102	15402000	16	46.0267	NaN	NaN	1	NaN	NaN	58.49	NaN	NaN	NaN	NaN	NaN	NaN	NaN	NaN	NaN	NaN	NaN	NaN	NaN	NaN	NaN	NaN	NaN	NaN	NaN	NaN	NaN	NaN	NaN
O75915	161	O75915	O75915	PRA1 family protein 3	ARL6IP5	NKLENKMEGIGLKRTPMGIVLDALEQQEEGI	523	P	4	1034		1	1.22671e-08	130.12	112.78	130.12	-0.49761	72644000	161	130.124	1	NaN	NaN	130.12	NaN	NaN	1	130.124	1.22671e-08	130.12	NaN	NaN	NaN	NaN	NaN	NaN	NaN	NaN	NaN	NaN	NaN	NaN	NaN	NaN	NaN	NaN	NaN	NaN	NaN
O75934	56	O75934	O75934	Pre-mRNA-splicing factor SPF27	BCAS2	RRYRPTKNYLSYLTAPDYSAFETDIMRNEFE	524	P	3	1038		1	0.00509579	67.239	60.643	67.239	-0.64281	180520000	56	67.239	NaN	1	NaN	NaN	67.239	NaN	NaN	NaN	NaN	NaN	NaN	NaN	NaN	NaN	NaN	NaN	NaN	NaN	NaN	NaN	NaN	NaN	NaN	NaN	NaN	NaN	NaN	NaN	NaN
O75940	220	O75940	O75940	Survival of motor neuron-related-splicing factor 30	SMNDC1	VTGKVGVGTCGIADKPMTQYQDTSKYNVRHL	525	P	3	1041		1	3.15591e-21	159.73	149.67	158.77	0.017625	1226500000	220	158.772	1	1	1	158.77	93.73	159.73	NaN	NaN	NaN	NaN	1	154.187	3.52374e-15	154.19	NaN	NaN	NaN	NaN	1	158.772	2.61496e-19	158.77	NaN	NaN	NaN	NaN	NaN	NaN	NaN
O75947	151	O75947	O75947	ATP synthase subunit d, mitochondrial	ATP5H	LNEAFPETKLDKKKYPYWPHQPIENL_____	526	P	2	1043		1	0.000564394	158.02	127.14	158.02	0.53061	242720000	151	69.1873	NaN	1	NaN	NaN	158.02	NaN	NaN	NaN	NaN	NaN	NaN	NaN	NaN	NaN	NaN	NaN	NaN	NaN	NaN	NaN	NaN	NaN	NaN	NaN	NaN	NaN	NaN	NaN	NaN
O75947	154	O75947	O75947	ATP synthase subunit d, mitochondrial	ATP5H	AFPETKLDKKKYPYWPHQPIENL________	527	P	2	1043		1	0.000564394	158.02	127.14	158.02	0.53061	242720000	154	70.2401	NaN	1	NaN	NaN	158.02	NaN	NaN	NaN	NaN	NaN	NaN	NaN	NaN	NaN	NaN	NaN	NaN	NaN	NaN	NaN	NaN	NaN	NaN	NaN	NaN	NaN	NaN	NaN	NaN
O75947	49	O75947	O75947	ATP synthase subunit d, mitochondrial	ATP5H	WNETLTSRLAALPENPPAIDWAYYKANVAKA	528	P	2	1043		0.999983	0.0154068	93.345	85.434	93.345	0.1765	467690000	49	47.6922	0.999983	0.999863	0.999887	93.345	83.182	85.813	0.999983	47.6922	0.0154068	93.345	NaN	NaN	NaN	NaN	NaN	NaN	NaN	NaN	NaN	NaN	NaN	NaN	NaN	NaN	NaN	NaN	NaN	NaN	NaN
O75947	50	O75947	O75947	ATP synthase subunit d, mitochondrial	ATP5H	NETLTSRLAALPENPPAIDWAYYKANVAKAG	529	P	2	1043		0.999983	0.0154068	93.345	85.434	93.345	0.1765	467690000	50	47.6922	0.999983	0.999863	0.999887	93.345	83.182	85.813	0.999983	47.6922	0.0154068	93.345	NaN	NaN	NaN	NaN	NaN	NaN	NaN	NaN	NaN	NaN	NaN	NaN	NaN	NaN	NaN	NaN	NaN	NaN	NaN
O75947	127	O75947	O75947	ATP synthase subunit d, mitochondrial	ATP5H	IVEYEKEMEKMKNLIPFDQMTIEDLNEAFPE	530	P	2	1043		1	2.99909e-18	165.64	149.7	165.64	-1.2785	3711500000	127	129.985	0.999999	1	1	68.49	165.64	150.12	0.999988	49.2729	0.00469594	67.992	0.999997	54.6356	0.00092591	68.49	0.999965	44.5228	0.0458304	55.206	NaN	NaN	NaN	NaN	NaN	NaN	NaN	NaN	0.999999	61.2964	0.00092591
O75947	21	O75947	O75947	ATP synthase subunit d, mitochondrial	ATP5H	LALKTIDWVAFAEIIPQNQKAIASSLKSWNE	531	P	3	1043		1	0.00510735	68.972	54.718	68.972	-0.010297	12560000	21	68.9722	NaN	1	1	NaN	63.727	68.972	NaN	NaN	NaN	NaN	NaN	NaN	NaN	NaN	NaN	NaN	NaN	NaN	NaN	NaN	NaN	NaN	NaN	NaN	NaN	NaN	NaN	NaN	NaN
O75970	747	O75970	O75970	Multiple PDZ domain protein	MPDZ	SLVPGGIAEKDGRLLPGDRLMFVNDVNLENS	532	P	3	1050		1	4.97742e-10	123.16	114.18	66.925	0.73245	721350000	747	66.9249	1	1	1	123.16	79.636	116.73	1	118.106	4.97742e-10	123.16	NaN	NaN	NaN	NaN	1	66.9249	0.00163643	66.925	NaN	NaN	NaN	NaN	NaN	NaN	NaN	NaN	NaN	NaN	NaN
O75976	604	O75976	O75976	Carboxypeptidase D	CPD	PEVTDLVHNTRIHLMPSMNPDGYEKSQEGDS	533	P	4	1053		0.956846	0.000503877	65.779	58.498	65.779	-0.90458	38090000	604	13.4582	0.956846	NaN	NaN	65.779	NaN	NaN	0.956846	13.4582	0.000503877	65.779	NaN	NaN	NaN	NaN	NaN	NaN	NaN	NaN	NaN	NaN	NaN	NaN	NaN	NaN	NaN	NaN	NaN	NaN	NaN
O76003	230	O76003	O76003	Glutaredoxin-3	GLRX3	IIKELEASEELDTICPKAPKLEERLKVLTNK	534	P	2	1054		1	8.89574e-19	199.68	183.54	199.68	0.60308	336950000	230	199.677	1	NaN	NaN	199.68	NaN	NaN	0	0	NaN	NaN	NaN	NaN	NaN	NaN	NaN	NaN	NaN	NaN	NaN	NaN	NaN	NaN	1	136.5	0.0135528	143.24	1	199.677	8.89574e-19
O76003	145	O76003	O76003	Glutaredoxin-3	GLRX3	KEDLNLRLKKLTHAAPCMLFMKGTPQEPRCG	535	P	2	1054		1	0.00145108	105.2	90.748	81.972	0.24855	31088000	145	81.9717	NaN	1	1	NaN	81.972	105.2	NaN	NaN	NaN	NaN	NaN	NaN	NaN	NaN	NaN	NaN	NaN	NaN	NaN	NaN	NaN	NaN	NaN	NaN	NaN	NaN	NaN	NaN	NaN
O76003	41	O76003	O76003	Glutaredoxin-3	GLRX3	LRLKAKSLLVVHFWAPWAPQCAQMNEVMAEL	536	P	3	1054		0.499727	0.000160371	46.804	46.804	46.804	-1.8945	0	41	0	NaN	0.499727	NaN	NaN	46.804	NaN	NaN	NaN	NaN	NaN	NaN	NaN	NaN	NaN	NaN	NaN	NaN	NaN	NaN	NaN	NaN	NaN	NaN	NaN	NaN	NaN	NaN	NaN	NaN
O76003	44	O76003	O76003	Glutaredoxin-3	GLRX3	KAKSLLVVHFWAPWAPQCAQMNEVMAELAKE	537	P	3	1054		0.499727	0.000160371	46.804	46.804	46.804	-1.8945	0	44	0	NaN	0.499727	NaN	NaN	46.804	NaN	NaN	NaN	NaN	NaN	NaN	NaN	NaN	NaN	NaN	NaN	NaN	NaN	NaN	NaN	NaN	NaN	NaN	NaN	NaN	NaN	NaN	NaN	NaN
O76031	575	O76031	O76031	ATP-dependent Clp protease ATP-binding subunit clpX-like, mitochondrial	CLPX	GARGLRSIMEKLLLEPMFEVPNSDIVCVEVD	538	P	4	1057		0.999976	0.000162084	80.664	63.998	80.664	1.209	65733000	575	46.2564	NaN	NaN	0.999976	NaN	NaN	80.664	NaN	NaN	NaN	NaN	NaN	NaN	NaN	NaN	NaN	NaN	NaN	NaN	NaN	NaN	NaN	NaN	NaN	NaN	NaN	NaN	NaN	NaN	NaN
O76031	248	O76031	O76031	ATP-dependent Clp protease ATP-binding subunit clpX-like, mitochondrial	CLPX	DEYRFTKLLQIAGISPHGNALGASMQQQVNQ	539	P	3	1057		0.999963	0.000306305	58.945	54.277	58.945	1.357	199840000	248	44.3233	0.999963	NaN	0.99979	58.945	NaN	51.621	NaN	NaN	NaN	NaN	0.999963	44.3233	0.000306305	58.945	NaN	NaN	NaN	NaN	NaN	NaN	NaN	NaN	NaN	NaN	NaN	NaN	NaN	NaN	NaN
O76080	9	O76080	O76080	AN1-type zinc finger protein 5	ZFAND5	_______MAQETNQTPGPMLCSTGCGFYGNP	540	P	3	1068		0.533603	0.00164468	48.685	46.372	48.685	-1.0599	5040700	9	0.588669	NaN	NaN	0.533603	NaN	NaN	48.685	NaN	NaN	NaN	NaN	NaN	NaN	NaN	NaN	NaN	NaN	NaN	NaN	NaN	NaN	NaN	NaN	NaN	NaN	NaN	NaN	NaN	NaN	NaN
O76080	115	O76080	O76080	AN1-type zinc finger protein 5	ZFAND5	QMTEMSISREDKITTPKTEVSEPVVTQPSPS	541	P	4	1068		0.999244	0.00786079	47.237	37.904	47.237	1.2886	63373000	115	31.5961	NaN	NaN	0.999244	NaN	NaN	47.237	NaN	NaN	NaN	NaN	NaN	NaN	NaN	NaN	NaN	NaN	NaN	NaN	NaN	NaN	NaN	NaN	NaN	NaN	NaN	NaN	NaN	NaN	NaN
O76094	507	O76094	O76094	Signal recognition particle subunit SRP72	SRP72	SLVDPEKAKALSKHLPSSDSMSLKVDVEALE	542	P	3	1070		1	2.90839e-05	110.31	104.15	100.7	-0.54976	802580000	507	100.697	1	1	1	107.17	107.83	110.31	1	107.172	7.74307e-05	107.17	1	64.7329	0.00387671	64.733	1	84.9326	6.96644e-05	84.933	NaN	NaN	NaN	NaN	NaN	NaN	NaN	NaN	NaN	NaN	NaN
O76094	563	O76094	O76094	Signal recognition particle subunit SRP72	SRP72	QGDLKKKKKKKKGKLPKNYDPKVTPDPERWL	543	P	2	1070		1	0.00785834	115	64.054	115	-0.36083	60617000	563	111.512	NaN	1	NaN	NaN	115	NaN	NaN	NaN	NaN	NaN	NaN	NaN	NaN	NaN	NaN	NaN	NaN	NaN	NaN	NaN	NaN	NaN	NaN	NaN	NaN	NaN	NaN	NaN	NaN
O76094	568	O76094	O76094	Signal recognition particle subunit SRP72	SRP72	KKKKKKKGKLPKNYDPKVTPDPERWLPMRER	544	P	2	1070		1	0.00785834	115	64.054	115	-0.36083	60617000	568	101.415	NaN	1	NaN	NaN	115	NaN	NaN	NaN	NaN	NaN	NaN	NaN	NaN	NaN	NaN	NaN	NaN	NaN	NaN	NaN	NaN	NaN	NaN	NaN	NaN	NaN	NaN	NaN	NaN
O94760	259	O94760	O94760	N(G),N(G)-dimethylarginine dimethylaminohydrolase 1	DDAH1	ESAKVYEKLKDHMLIPVSMSELEKVDGLLTC	545	P	5	1073		1	0.00100272	55.783	46.945	55.783	0.033227	51806000	259	55.7826	1	NaN	NaN	55.783	NaN	NaN	NaN	NaN	NaN	NaN	1	55.7826	0.00100272	55.783	NaN	NaN	NaN	NaN	NaN	NaN	NaN	NaN	NaN	NaN	NaN	NaN	NaN	NaN	NaN
O94760	183	O94760	O94760	N(G),N(G)-dimethylarginine dimethylaminohydrolase 1	DDAH1	VADGLHLKSFCSMAGPNLIAIGSSESAQKAL	546	P	3	1073		1	0.000174497	76.176	75.157	76.176	-2.3381	39792000	183	76.1761	1	1	1	52.509	75.358	76.176	NaN	NaN	NaN	NaN	NaN	NaN	NaN	NaN	NaN	NaN	NaN	NaN	NaN	NaN	NaN	NaN	1	52.509	0.00492691	52.509	NaN	NaN	NaN
O94768	22	O94768	O94768	Serine/threonine-protein kinase 17B	STK17B	DCRSISGLLTTTPQIPIKMENFNNFYILTSK	547	P	4	1078		0.97542	2.00712e-09	127.23	122.7	127.23	0.089516	66266000	22	15.9862	NaN	0.97542	NaN	NaN	127.23	NaN	NaN	NaN	NaN	NaN	NaN	NaN	NaN	NaN	NaN	NaN	NaN	NaN	NaN	NaN	NaN	NaN	NaN	NaN	NaN	NaN	NaN	NaN	NaN
O94788	9	O94788	O94788	Retinal dehydrogenase 2	ALDH1A2	_______MTSSKIEMPGEVKADPAALMASLH	548	P	4	1082		0.547184	2.20183e-07	93.043	93.043	46.464	-1.2741	848440000	9	0.937613	0.547184	0.531893	0.544453	56.984	93.043	63.033	NaN	NaN	NaN	NaN	0.547184	0.937613	4.16642e-05	56.984	NaN	NaN	NaN	NaN	NaN	NaN	NaN	NaN	NaN	NaN	NaN	NaN	NaN	NaN	NaN
O94788	16	O94788	O94788	Retinal dehydrogenase 2	ALDH1A2	MTSSKIEMPGEVKADPAALMASLHLLPSPTP	549	P	5	1082		0.808807	8.75377e-07	93.043	93.043	89.577	0.62561	339110000	16	6.3799	0.808807	0.499444	0.706572	89.577	93.043	69.482	0.499857	0.277981	3.7217e-06	62.383	0	0	NaN	NaN	0.808807	6.3799	9.57486e-05	89.577	NaN	NaN	NaN	NaN	NaN	NaN	NaN	NaN	NaN	NaN	NaN
O94788	27	O94788	O94788	Retinal dehydrogenase 2	ALDH1A2	VKADPAALMASLHLLPSPTPNLEIKYTKIFI	550	P	5	1082		0.67365	8.80084e-07	71.068	71.068	56.383	0.049368	383580000	27	6.44118	0	0.67365	NaN	NaN	71.068	NaN	NaN	NaN	NaN	NaN	0	0	NaN	NaN	NaN	NaN	NaN	NaN	NaN	NaN	NaN	NaN	NaN	NaN	NaN	NaN	NaN	NaN	NaN
O94804	948	O94804	O94804	Serine/threonine-protein kinase 10	STK10	REQEMFFKLSEEAECPNPSTPSKAAKFFPYS	551	P	2	1083		0.981934	0.00882363	111.86	104.13	111.86	0.82437	26826000	948	17.39	0.981934	NaN	NaN	111.86	NaN	NaN	NaN	NaN	NaN	NaN	NaN	NaN	NaN	NaN	NaN	NaN	NaN	NaN	NaN	NaN	NaN	NaN	0.981934	17.39	0.00882363	111.86	NaN	NaN	NaN
O94806;Q15139	399;405	O94806;Q15139	Q15139	Serine/threonine-protein kinase D3;Serine/threonine-protein kinase D1	PRKD3;PRKD1	EDANRTISPSTSNNIPLMRVVQSVKHTKRKS;EEAVKTISPSTSNNIPLMRVVQSIKHTKRKS	552	P	2	1084;3909		1	0.00909716	103.22	71.79	103.22	-0.21544	125420000	405	70.6146	1	0.999999	0.99998	103.22	94.616	100.72	0.999994	51.8729	0.0761441	94.616	NaN	NaN	NaN	NaN	1	70.6146	0.00909716	103.22	NaN	NaN	NaN	NaN	NaN	NaN	NaN	NaN	NaN	NaN	NaN
O94813	266	O94813	O94813	Slit homolog 2 protein;Slit homolog 2 protein N-product;Slit homolog 2 protein C-product	SLIT2	QKREFVCSGHQSFMAPSCSVLHCPAACTCSN	553	P	4	1087		0.5	0.000527007	47.241	47.228	47.241	-0.31797	20433000	266	0	0.5	NaN	NaN	47.241	NaN	NaN	NaN	NaN	NaN	NaN	0.5	0	0.000527007	47.241	NaN	NaN	NaN	NaN	NaN	NaN	NaN	NaN	NaN	NaN	NaN	NaN	NaN	NaN	NaN
O94813	274	O94813	O94813	Slit homolog 2 protein;Slit homolog 2 protein N-product;Slit homolog 2 protein C-product	SLIT2	GHQSFMAPSCSVLHCPAACTCSNNIVDCRGK	554	P	4	1087		0.5	0.000527007	47.241	47.228	47.241	-0.31797	20433000	274	0	0.5	NaN	NaN	47.241	NaN	NaN	NaN	NaN	NaN	NaN	0.5	0	0.000527007	47.241	NaN	NaN	NaN	NaN	NaN	NaN	NaN	NaN	NaN	NaN	NaN	NaN	NaN	NaN	NaN
O94826	383	O94826	O94826	Mitochondrial import receptor subunit TOM70	TOMM70A	NALIKRGSMYMQQQQPLLSTQDFNMAADIDP	555	P	5	1092		0.999796	7.8019e-08	83.198	83.198	50.942	-0.6101	98637000	383	36.8983	0.997235	0.999796	NaN	83.198	50.942	NaN	NaN	NaN	NaN	NaN	0.997235	25.5718	7.8019e-08	83.198	NaN	NaN	NaN	NaN	NaN	NaN	NaN	NaN	NaN	NaN	NaN	NaN	NaN	NaN	NaN
O94826	272	O94826	O94826	Mitochondrial import receptor subunit TOM70	TOMM70A	IKSYFSSFTDDIISQPMLKGEKSDEDKDKEG	556	P	2	1092		1	5.11609e-22	191.19	179.27	178.23	0.23849	454670000	272	178.235	1	NaN	1	191.19	NaN	178.23	NaN	NaN	NaN	NaN	NaN	NaN	NaN	NaN	1	116.975	5.11609e-22	191.19	NaN	NaN	NaN	NaN	NaN	NaN	NaN	NaN	NaN	NaN	NaN
O94854;Q9UPN3	2029;5902	O94854;Q9UPN3	Q9UPN3	Uncharacterized protein KIAA0754;Microtubule-actin cross-linking factor 1, isoforms 1/2/3/5	KIAA0754;MACF1	VSQSTQITEFHDKIEPMLETLENLSSRLRMP	557	P	4	1099;9318		1	4.24092e-22	148.75	138.26	100.41	1.0998	283410000	5902	100.415	1	NaN	1	148.75	NaN	100.41	NaN	NaN	NaN	NaN	1	148.752	4.24092e-22	148.75	NaN	NaN	NaN	NaN	NaN	NaN	NaN	NaN	NaN	NaN	NaN	NaN	NaN	NaN	NaN
O94854;Q9UPN3	3102;6975	O94854;Q9UPN3	Q9UPN3	Uncharacterized protein KIAA0754;Microtubule-actin cross-linking factor 1, isoforms 1/2/3/5	KIAA0754;MACF1	SRSGGRKSLSQPTPPPMPILSQSEAKNPRIN	558	P	2	1099;9318		0.753538	0.000431404	109.83	70.96	109.83	-0.15303	31281000	6975	7.3149	NaN	0.753538	NaN	NaN	109.83	NaN	NaN	NaN	NaN	NaN	NaN	NaN	NaN	NaN	NaN	NaN	NaN	NaN	NaN	NaN	NaN	NaN	NaN	NaN	NaN	NaN	NaN	NaN	NaN
O94855	292	O94855	O94855	Protein transport protein Sec24D	SEC24D	SRGGQVYATNTRGQIPPLVTTDCMIQDQGNA	559	P	3	1100		0.499996	0.00566405	54.672	47.396	54.672	0.43204	21965000	292	0	0.499934	NaN	0.499996	42.904	NaN	54.672	NaN	NaN	NaN	NaN	NaN	NaN	NaN	NaN	NaN	NaN	NaN	NaN	NaN	NaN	NaN	NaN	0.499934	0	0.0401379	42.904	NaN	NaN	NaN
O94855	293	O94855	O94855	Protein transport protein Sec24D	SEC24D	RGGQVYATNTRGQIPPLVTTDCMIQDQGNAS	560	P	3	1100		0.499996	0.00566405	54.672	47.396	54.672	0.43204	21965000	293	0	0.499934	NaN	0.499996	42.904	NaN	54.672	NaN	NaN	NaN	NaN	NaN	NaN	NaN	NaN	NaN	NaN	NaN	NaN	NaN	NaN	NaN	NaN	0.499934	0	0.0401379	42.904	NaN	NaN	NaN
O94903	50	O94903	O94903	Proline synthase co-transcribed bacterial homolog protein	PROSC	LPAIQPRLVAVSKTKPADMVIEAYGHGQRTF	561	P	4	1115		1	0.000866222	77.562	70.671	60.474	0.25691	257490000	50	60.4741	1	NaN	1	77.562	NaN	60.474	1	50.6082	0.0185121	50.608	NaN	NaN	NaN	NaN	1	77.5617	0.000866222	77.562	NaN	NaN	NaN	NaN	NaN	NaN	NaN	NaN	NaN	NaN	NaN
O94905	302	O94905	O94905	Erlin-2	ERLIN2	KAIASNSKIYFGKDIPNMFMDSAGSVSKQFE	562	P	3	1116		1	0.000822546	92.925	86.072	90.316	-0.52604	1754700000	302	90.3161	1	1	1	60.325	90.316	92.925	NaN	NaN	NaN	NaN	1	60.3249	0.00585294	60.325	1	48.6162	0.0132485	53.059	NaN	NaN	NaN	NaN	NaN	NaN	NaN	NaN	NaN	NaN	NaN
O94906	639	O94906	O94906	Pre-mRNA-processing factor 6	PRPF6	VPAARSILALAFQANPNSEEIWLAAVKLESE	563	P	3	1117		1	3.18344e-07	100.1	95.779	100.1	-2.11	16309000	639	100.095	1	1	1	87.749	84.641	100.1	NaN	NaN	NaN	NaN	NaN	NaN	NaN	NaN	1	87.7493	3.49651e-06	87.749	NaN	NaN	NaN	NaN	NaN	NaN	NaN	NaN	NaN	NaN	NaN
O94923	439	O94923	O94923	D-glucuronyl C5-epimerase	GLCE	IMVTRKLGEGFKSLEPGWYSAMAQGQAISTL	564	P	3	1123		1	0.0254375	47.392	37.918	47.392	1.146	18575000	439	47.3921	NaN	1	NaN	NaN	47.392	NaN	NaN	NaN	NaN	NaN	NaN	NaN	NaN	NaN	NaN	NaN	NaN	NaN	NaN	NaN	NaN	NaN	NaN	NaN	NaN	NaN	NaN	NaN	NaN
O94925	329	O94925	O94925	Glutaminase kidney isoform, mitochondrial	GLS	SGLRFNKLFLNEDDKPHNPMVNAGAIVVTSL	565	P	5	1124		0.555788	8.5707e-05	85.489	80.223	85.489	-0.5742	580390000	329	0.973195	NaN	0.52696	0.555788	NaN	42.59	85.489	NaN	NaN	NaN	NaN	NaN	NaN	NaN	NaN	NaN	NaN	NaN	NaN	NaN	NaN	NaN	NaN	NaN	NaN	NaN	NaN	NaN	NaN	NaN
O94925	332	O94925	O94925	Glutaminase kidney isoform, mitochondrial	GLS	RFNKLFLNEDDKPHNPMVNAGAIVVTSLIKQ	566	P	3	1124		0.999678	8.99986e-37	174.31	157.91	174.31	-0.35001	410450000	332	34.9169	NaN	0.999678	0.993982	NaN	174.31	93.176	NaN	NaN	NaN	NaN	NaN	NaN	NaN	NaN	NaN	NaN	NaN	NaN	NaN	NaN	NaN	NaN	NaN	NaN	NaN	NaN	NaN	NaN	NaN
O94925	450	O94925	O94925	Glutaminase kidney isoform, mitochondrial	GLS	ANGGFCPITGERVLSPEAVRNTLSLMHSCGM	567	P	5	1124		1	6.47366e-06	87.719	82.404	87.719	-0.34129	254920000	450	63.1279	NaN	1	NaN	NaN	87.719	NaN	NaN	NaN	NaN	NaN	NaN	NaN	NaN	NaN	NaN	NaN	NaN	NaN	NaN	NaN	NaN	NaN	NaN	NaN	NaN	NaN	NaN	NaN	NaN
O94952	543	O94952	O94952	F-box only protein 21	FBXO21	MMGHEWIRNMNVHSLPHGHHQPFYNVLVEDG	568	P	5	1127		0.930697	0.00202714	54.521	48.618	54.521	-1.1217	93139000	543	11.2806	0.870044	NaN	0.930697	46.404	NaN	54.521	NaN	NaN	NaN	NaN	NaN	NaN	NaN	NaN	NaN	NaN	NaN	NaN	0.870044	8.25747	0.0074779	46.404	NaN	NaN	NaN	NaN	NaN	NaN	NaN
O94973	829	O94973	O94973	AP-2 complex subunit alpha-2	AP2A2	NVSVQLPITLNKFFQPTEMASQDFFQRWKQL	569	P	3	1134		1	0.0189668	58.071	14.259	58.071	-3.411	33040000	829	58.0713	NaN	1	1	NaN	54.234	58.071	NaN	NaN	NaN	NaN	NaN	NaN	NaN	NaN	NaN	NaN	NaN	NaN	NaN	NaN	NaN	NaN	NaN	NaN	NaN	NaN	NaN	NaN	NaN
O94979	824	O94979	O94979	Protein transport protein Sec31A	SEC31A	LPKGRPGPVAGHHQMPRVQTQQYYPHGENPP	570	P	4	1135		0.999988	0.0114691	61.423	49.446	61.423	-2.4728	193810000	824	49.6319	0.999951	0.999988	0.999938	56.569	61.423	52.265	0.999893	40.661	0.0441496	49.298	NaN	NaN	NaN	NaN	NaN	NaN	NaN	NaN	NaN	NaN	NaN	NaN	0.999951	43.8308	0.0205004	56.569	0.99995	44.7339	0.0310555
O94986	1491	O94986	O94986	Centrosomal protein of 152 kDa	CEP152	HKKKDLLSDNGSESLPHSAAYPFLGTLGNKP	571	P	5	1138		0.978806	0.00492814	48.685	30.891	48.685	2.6206	25189000	1491	16.6448	NaN	0.978806	NaN	NaN	48.685	NaN	NaN	NaN	NaN	NaN	NaN	NaN	NaN	NaN	NaN	NaN	NaN	NaN	NaN	NaN	NaN	NaN	NaN	NaN	NaN	NaN	NaN	NaN	NaN
O94988	733	O94988	O94988	Protein FAM13A	FAM13A	QLKESKLKISEEDLTPRMRQRSNTLPKSFGS	572	P	3	1139		1	0.0242397	49.28	37.409	49.28	4.3932	77419000	733	49.2801	NaN	1	NaN	NaN	49.28	NaN	NaN	NaN	NaN	NaN	NaN	NaN	NaN	NaN	NaN	NaN	NaN	NaN	NaN	NaN	NaN	NaN	NaN	NaN	NaN	NaN	NaN	NaN	NaN
O95071	2650	O95071	O95071	E3 ubiquitin-protein ligase UBR5	UBR5	VRKYAEHRMLVVAEQPLHAMRKGLLDVLPKN	573	P	3	1147		1	0.00907628	51.211	43.235	51.211	1.3655	0	2650	51.2109	NaN	1	NaN	NaN	51.211	NaN	NaN	NaN	NaN	NaN	NaN	NaN	NaN	NaN	NaN	NaN	NaN	NaN	NaN	NaN	NaN	NaN	NaN	NaN	NaN	NaN	NaN	NaN	NaN
O95071	821	O95071	O95071	E3 ubiquitin-protein ligase UBR5	UBR5	QESPIILRDGNGTIYPMAKDCMGGIRDPDWL	574	P	3	1147		0.999957	1.73499e-12	139.73	122.37	139.73	0.62397	283540000	821	43.7094	0.999954	0.999957	0.999936	110.68	139.73	125.11	0.99294	21.4815	0.000969126	80.359	0.998846	29.3746	0.000854467	82.849	0.999954	43.3721	0.000253746	110.68	NaN	NaN	NaN	NaN	NaN	NaN	NaN	NaN	NaN	NaN	NaN
O95104	143	O95104	O95104	Splicing factor, arginine/serine-rich 15	SCAF4	IQPLLDMAAGTSNAAPVAENVTNNEGSPPPP	575	P	4	1150		0.998988	0.000154459	40.347	39.054	40.347	-1.4831	125340000	143	29.9241	NaN	NaN	0.998988	NaN	NaN	40.347	NaN	NaN	NaN	NaN	NaN	NaN	NaN	NaN	NaN	NaN	NaN	NaN	NaN	NaN	NaN	NaN	NaN	NaN	NaN	NaN	NaN	NaN	NaN
O95104	155	O95104	O95104	Splicing factor, arginine/serine-rich 15	SCAF4	NAAPVAENVTNNEGSPPPPVKVSSEPPTQAT	576	P	4	1150		0.99902	0.000154459	40.347	39.054	40.347	-1.4831	125340000	155	30.065	NaN	NaN	0.99902	NaN	NaN	40.347	NaN	NaN	NaN	NaN	NaN	NaN	NaN	NaN	NaN	NaN	NaN	NaN	NaN	NaN	NaN	NaN	NaN	NaN	NaN	NaN	NaN	NaN	NaN
O95104	156	O95104	O95104	Splicing factor, arginine/serine-rich 15	SCAF4	AAPVAENVTNNEGSPPPPVKVSSEPPTQATP	577	P	4	1150		0.99902	0.000154459	40.347	39.054	40.347	-1.4831	125340000	156	30.065	NaN	NaN	0.99902	NaN	NaN	40.347	NaN	NaN	NaN	NaN	NaN	NaN	NaN	NaN	NaN	NaN	NaN	NaN	NaN	NaN	NaN	NaN	NaN	NaN	NaN	NaN	NaN	NaN	NaN
O95104	157	O95104	O95104	Splicing factor, arginine/serine-rich 15	SCAF4	APVAENVTNNEGSPPPPVKVSSEPPTQATPN	578	P	4	1150		0.99902	0.000154459	40.347	39.054	40.347	-1.4831	125340000	157	30.065	NaN	NaN	0.99902	NaN	NaN	40.347	NaN	NaN	NaN	NaN	NaN	NaN	NaN	NaN	NaN	NaN	NaN	NaN	NaN	NaN	NaN	NaN	NaN	NaN	NaN	NaN	NaN	NaN	NaN
O95104	158	O95104	O95104	Splicing factor, arginine/serine-rich 15	SCAF4	PVAENVTNNEGSPPPPVKVSSEPPTQATPNS	579	P	4	1150		0.998791	0.000154459	40.347	39.054	40.347	-1.4831	125340000	158	29.1522	NaN	NaN	0.998791	NaN	NaN	40.347	NaN	NaN	NaN	NaN	NaN	NaN	NaN	NaN	NaN	NaN	NaN	NaN	NaN	NaN	NaN	NaN	NaN	NaN	NaN	NaN	NaN	NaN	NaN
O95139	118	O95139	O95139	NADH dehydrogenase [ubiquinone] 1 beta subcomplex subunit 6	NDUFB6	RIFPGDTILETGEVIPPMKEFPDQHH_____	580	P	3	1153		0.574268	9.88628e-05	88.976	77.01	88.976	-0.53741	1956400000	118	1.46473	0.574268	0.547675	0.571167	88.976	75.23	83.905	NaN	NaN	NaN	NaN	NaN	NaN	NaN	NaN	0.574268	1.46473	9.88628e-05	88.976	NaN	NaN	NaN	NaN	NaN	NaN	NaN	NaN	NaN	NaN	NaN
O95139	119	O95139	O95139	NADH dehydrogenase [ubiquinone] 1 beta subcomplex subunit 6	NDUFB6	IFPGDTILETGEVIPPMKEFPDQHH______	581	P	3	1153		0.853378	0.00123796	86.625	71.033	86.625	-0.18035	966570000	119	7.64943	NaN	NaN	0.853378	NaN	NaN	86.625	NaN	NaN	NaN	NaN	NaN	NaN	NaN	NaN	NaN	NaN	NaN	NaN	NaN	NaN	NaN	NaN	NaN	NaN	NaN	NaN	NaN	NaN	NaN
O95139	124	O95139	O95139	NADH dehydrogenase [ubiquinone] 1 beta subcomplex subunit 6	NDUFB6	TILETGEVIPPMKEFPDQHH___________	582	P	4	1153		0.778126	6.70304e-05	81.341	72.607	81.341	-1.9635	49929000	124	8.45975	NaN	0.778126	0.453283	NaN	81.341	71.091	NaN	NaN	NaN	NaN	NaN	NaN	NaN	NaN	NaN	NaN	NaN	NaN	NaN	NaN	NaN	NaN	NaN	NaN	NaN	NaN	NaN	NaN	NaN
O95147	77	O95147	O95147	Dual specificity protein phosphatase 14	DUSP14	EIPNFNWPQFEYVKVPLADMPHAPIGLYFDT	583	P	5	1155		0.513148	0.000291012	63.901	57.806	63.901	0.029166	147440000	77	0.409941	NaN	0.513148	0.438216	NaN	63.901	50.986	NaN	NaN	NaN	NaN	NaN	NaN	NaN	NaN	NaN	NaN	NaN	NaN	NaN	NaN	NaN	NaN	NaN	NaN	NaN	NaN	NaN	NaN	NaN
O95147	82	O95147	O95147	Dual specificity protein phosphatase 14	DUSP14	NWPQFEYVKVPLADMPHAPIGLYFDTVADKI	584	P	5	1155	+	0.482437	0.00123547	52.824	47.044	52.824	0.19311	0	82	0.433122	0.482437	NaN	0.461669	52.824	NaN	50.986	NaN	NaN	NaN	NaN	0.482437	0.433122	0.00123547	52.824	NaN	NaN	NaN	NaN	NaN	NaN	NaN	NaN	NaN	NaN	NaN	NaN	NaN	NaN	NaN
O95163	712	O95163	O95163	Elongator complex protein 1	IKBKAP	IVTVVPQDTKLVLQMPRGNLEVVHHRALVLA	585	P	3	1160		1	9.73483e-06	145.55	129.36	140.22	0.023432	860890000	712	76.5357	0.999999	1	1	125.5	145.55	124.25	NaN	NaN	NaN	NaN	0.999998	57.759	0.00374963	90.754	0.999999	62.3717	0.00073813	125.5	0.998763	29.0695	0.0278828	66.246	NaN	NaN	NaN	NaN	NaN	NaN	NaN
O95163	1004	O95163	O95163	Elongator complex protein 1	IKBKAP	SIAYGEHLMQEHMYEPAGLMFARCGAHEKAL	586	P	4	1160		0.999948	7.95079e-07	76.956	76.956	76.956	0.36741	527520000	1004	45.5887	0.999792	0.999638	0.999948	53.482	57.076	76.956	NaN	NaN	NaN	NaN	NaN	NaN	NaN	NaN	0.991017	20.4778	0.000333099	46.54	0.999792	34.4895	0.00306972	53.482	NaN	NaN	NaN	NaN	NaN	NaN	NaN
O95164	6	O95164	O95164	Ubiquitin-like protein 3	UBL3	__________MSSNVPADMINLRLILVSGKT	587	P	2	1161		1	0.0140702	47.823	20.709	47.823	-2.457	2383800	6	47.8234	1	NaN	NaN	47.823	NaN	NaN	NaN	NaN	NaN	NaN	NaN	NaN	NaN	NaN	NaN	NaN	NaN	NaN	NaN	NaN	NaN	NaN	1	47.8234	0.0140702	47.823	NaN	NaN	NaN
O95167	50	O95167	O95167	NADH dehydrogenase [ubiquinone] 1 alpha subcomplex subunit 3	NDUFA3	LSPYFKYSVMINKATPYNYPVPVRDDGNMPD	588	P	3	1163		0.294914	0.000163766	55.101	50.244	55.101	0.13568	0	50	1.02954	0.294914	NaN	NaN	55.101	NaN	NaN	0	0	NaN	NaN	NaN	NaN	NaN	NaN	NaN	NaN	NaN	NaN	0.294914	1.02954	0.000163766	55.101	NaN	NaN	NaN	NaN	NaN	NaN	NaN
O95167	54	O95167	O95167	NADH dehydrogenase [ubiquinone] 1 alpha subcomplex subunit 3	NDUFA3	FKYSVMINKATPYNYPVPVRDDGNMPDVPSH	589	P	3	1163		0.436442	8.86428e-07	64.686	60.242	47.191	2.0901	0	54	0.583225	0.436442	0.42959	NaN	64.686	54.703	NaN	0.342092	0.589267	8.86428e-07	64.686	0.436442	0.583225	0.00538042	47.191	NaN	NaN	NaN	NaN	NaN	NaN	NaN	NaN	NaN	NaN	NaN	NaN	NaN	NaN	NaN
O95167	56	O95167	O95167	NADH dehydrogenase [ubiquinone] 1 alpha subcomplex subunit 3	NDUFA3	YSVMINKATPYNYPVPVRDDGNMPDVPSHPQ	590	P	4	1163		0.909342	8.95938e-08	89.391	81.586	73.657	-2.2699	1351400000	56	12.6428	0.909342	0.74852	0.720839	73.657	89.391	57.025	0.909342	12.6428	8.95938e-08	73.657	0.848527	10.334	0.00158419	48.388	NaN	NaN	NaN	NaN	NaN	NaN	NaN	NaN	NaN	NaN	NaN	NaN	NaN	NaN	NaN
O95167	64	O95167	O95167	NADH dehydrogenase [ubiquinone] 1 alpha subcomplex subunit 3	NDUFA3	TPYNYPVPVRDDGNMPDVPSHPQDPQGPSLE	591	P	4	1163		0.55007	0.00344998	46.31	42.035	40.638	-2.9424	54379000	64	4.84473	0.55007	NaN	NaN	46.31	NaN	NaN	0.448928	0.454563	0.00344998	46.31	NaN	NaN	NaN	NaN	NaN	NaN	NaN	NaN	0.55007	4.84473	0.00805476	40.638	NaN	NaN	NaN	NaN	NaN	NaN	NaN
O95167	73	O95167	O95167	NADH dehydrogenase [ubiquinone] 1 alpha subcomplex subunit 3	NDUFA3	RDDGNMPDVPSHPQDPQGPSLEWLKKL____	592	P	4	1163		0.84168	0.00158419	48.388	44.113	46.31	-0.78195	282420000	73	7.65664	0.84168	NaN	NaN	48.388	NaN	NaN	0.84168	7.65664	0.00344998	46.31	0.807478	5.52291	0.00158419	48.388	NaN	NaN	NaN	NaN	0.819819	9.48492	0.00805476	40.638	NaN	NaN	NaN	NaN	NaN	NaN	NaN
O95167	76	O95167	O95167	NADH dehydrogenase [ubiquinone] 1 alpha subcomplex subunit 3	NDUFA3	GNMPDVPSHPQDPQGPSLEWLKKL_______	593	P	4	1163		0.84168	0.00158419	48.388	44.113	46.31	-0.78195	282420000	76	7.65664	0.84168	NaN	NaN	48.388	NaN	NaN	0.84168	7.65664	0.00344998	46.31	0.807478	5.52291	0.00158419	48.388	NaN	NaN	NaN	NaN	0.819819	9.48492	0.00805476	40.638	NaN	NaN	NaN	NaN	NaN	NaN	NaN
O95169	66	O95169	O95169	NADH dehydrogenase [ubiquinone] 1 beta subcomplex subunit 8, mitochondrial	NDUFB8	AAKKYNMRVEDYEPYPDDGMGYGDYPKLPDR	594	P	3	1165		0.972406	0.00138351	62.684	62.684	55.705	0.90679	69351000	66	16.9808	0.971747	NaN	0.972406	62.684	NaN	55.705	NaN	NaN	NaN	NaN	NaN	NaN	NaN	NaN	NaN	NaN	NaN	NaN	NaN	NaN	NaN	NaN	0.971747	15.7016	0.00138351	62.684	NaN	NaN	NaN
O95169	104	O95169	O95169	NADH dehydrogenase [ubiquinone] 1 beta subcomplex subunit 8, mitochondrial	NDUFB8	WYSWDQPGLRLNWGEPMHWHLDMYNRNRVDT	595	P	4	1165		1	0.0033065	62.165	58.671	62.165	0.079261	81859000	104	62.1651	NaN	1	NaN	NaN	62.165	NaN	NaN	NaN	NaN	NaN	NaN	NaN	NaN	NaN	NaN	NaN	NaN	NaN	NaN	NaN	NaN	NaN	NaN	NaN	NaN	NaN	NaN	NaN	NaN
O95197	31	O95197	O95197	Reticulon-3	RTN3	SSFGAEPSAPGGGGSPGACPALGTKSCSSSC	596	P	3	1169		0.477629	2.01824e-05	48.096	42.579	48.096	1.0216	0	31	0	NaN	NaN	0.477629	NaN	NaN	48.096	NaN	NaN	NaN	NaN	NaN	NaN	NaN	NaN	NaN	NaN	NaN	NaN	NaN	NaN	NaN	NaN	NaN	NaN	NaN	NaN	NaN	NaN	NaN
O95197	35	O95197	O95197	Reticulon-3	RTN3	AEPSAPGGGGSPGACPALGTKSCSSSCADSF	597	P	3	1169		0.477629	2.01824e-05	48.096	42.579	48.096	1.0216	0	35	0	NaN	NaN	0.477629	NaN	NaN	48.096	NaN	NaN	NaN	NaN	NaN	NaN	NaN	NaN	NaN	NaN	NaN	NaN	NaN	NaN	NaN	NaN	NaN	NaN	NaN	NaN	NaN	NaN	NaN
O95201	31	O95201	O95201	Zinc finger protein 205	ZNF205	TPPEVPDRGHPHQEMPSKLGEAVPSGDTQES	598	P	5	1172		0.688546	9.00069e-06	61.526	56.207	61.526	-0.3506	28863000	31	3.91323	NaN	0.688546	NaN	NaN	61.526	NaN	NaN	NaN	NaN	NaN	NaN	NaN	NaN	NaN	NaN	NaN	NaN	NaN	NaN	NaN	NaN	NaN	NaN	NaN	NaN	NaN	NaN	NaN	NaN
O95202	637	O95202	O95202	LETM1 and EF-hand domain-containing protein 1, mitochondrial	LETM1	LISQLEMDQQAGKLAPANGMPTGENVISVAE	599	P	2	1173		0.999302	3.48183e-06	116.43	116.43	116.43	-0.37352	275150000	637	31.5568	0.999302	NaN	NaN	116.43	NaN	NaN	NaN	NaN	NaN	NaN	NaN	NaN	NaN	NaN	0.999302	31.5568	3.48183e-06	116.43	NaN	NaN	NaN	NaN	NaN	NaN	NaN	NaN	NaN	NaN	NaN
O95232	20	O95232	O95232	Luc7-like protein 3	LUC7L3	AQLLDELMGRDRNLAPDEKRSNVRWDHESVC	600	P	3	1179		1	6.19767e-05	69.122	56.568	48.656	0.34399	92639000	20	48.6557	1	NaN	1	69.122	NaN	58.914	NaN	NaN	NaN	NaN	NaN	NaN	NaN	NaN	NaN	NaN	NaN	NaN	NaN	NaN	NaN	NaN	NaN	NaN	NaN	NaN	1	48.6557	6.19767e-05
O95235	511	O95235	O95235	Kinesin-like protein KIF20A	KIF20A	HVAKFSAIASQLVHAPPMQLGFPSLHSFIKE	601	P	6	1180		0.781238	5.09363e-08	81.988	74.613	61.082	-0.11649	165290000	511	5.59209	NaN	NaN	0.781238	NaN	NaN	81.988	NaN	NaN	NaN	NaN	NaN	NaN	NaN	NaN	NaN	NaN	NaN	NaN	NaN	NaN	NaN	NaN	NaN	NaN	NaN	NaN	NaN	NaN	NaN
O95235	512	O95235	O95235	Kinesin-like protein KIF20A	KIF20A	VAKFSAIASQLVHAPPMQLGFPSLHSFIKEH	602	P	4	1180		0.499914	0.000143912	73.805	65.365	73.805	-0.37225	61227000	512	0	NaN	NaN	0.499914	NaN	NaN	73.805	NaN	NaN	NaN	NaN	NaN	NaN	NaN	NaN	NaN	NaN	NaN	NaN	NaN	NaN	NaN	NaN	NaN	NaN	NaN	NaN	NaN	NaN	NaN
O95235	57	O95235	O95235	Kinesin-like protein KIF20A	KIF20A	DCSVVSTSLEDKQQVPSEDSMEKVKVYLRVR	603	P	4	1180		1	0.009554	44.05	38.784	42.659	0.94094	103250000	57	42.6587	1	NaN	1	42.659	NaN	44.05	NaN	NaN	NaN	NaN	NaN	NaN	NaN	NaN	NaN	NaN	NaN	NaN	1	42.6587	0.0112071	42.659	NaN	NaN	NaN	NaN	NaN	NaN	NaN
O95235	22	O95235	O95235	Kinesin-like protein KIF20A	KIF20A	SPPAGLLSDDDVVVSPMFESTAADLGSVVRK	604	P	4	1180		0.928366	0.000124801	43.066	35.449	43.066	0.64027	41440000	22	14.1363	NaN	NaN	0.928366	NaN	NaN	43.066	NaN	NaN	NaN	NaN	NaN	NaN	NaN	NaN	NaN	NaN	NaN	NaN	NaN	NaN	NaN	NaN	NaN	NaN	NaN	NaN	NaN	NaN	NaN
O95248	1821	O95248	O95248	Myotubularin-related protein 5	SBF1	GVIDLAEVEAVAPGTPTMGAPKTVDEKAFFD	605	P	3	1183		0.818283	0.00556522	54.857	39.38	54.857	0.74831	55335000	1821	6.61225	NaN	NaN	0.818283	NaN	NaN	54.857	NaN	NaN	NaN	NaN	NaN	NaN	NaN	NaN	NaN	NaN	NaN	NaN	NaN	NaN	NaN	NaN	NaN	NaN	NaN	NaN	NaN	NaN	NaN
O95248	545	O95248	O95248	Myotubularin-related protein 5	SBF1	PAVKAERRTTVPSGPPMTAILERCSGLHVNS	606	P	2	1183		0.904602	0.0106024	116.24	90.119	104.87	-0.24682	282670000	545	9.84789	NaN	0.899258	0.904602	NaN	116.24	104.87	NaN	NaN	NaN	NaN	NaN	NaN	NaN	NaN	NaN	NaN	NaN	NaN	NaN	NaN	NaN	NaN	NaN	NaN	NaN	NaN	NaN	NaN	NaN
O95249	98	O95249	O95249	Golgi SNAP receptor complex member 1	GOSR1	GVNDKMAEYTNSAGVPSLNAALMHTLQRHRD	607	P	3	1184		1	0.0165167	44.632	37.186	44.632	-1.627	43742000	98	44.6323	NaN	1	NaN	NaN	44.632	NaN	NaN	NaN	NaN	NaN	NaN	NaN	NaN	NaN	NaN	NaN	NaN	NaN	NaN	NaN	NaN	NaN	NaN	NaN	NaN	NaN	NaN	NaN	NaN
O95260	65	O95260	O95260	Arginyl-tRNA--protein transferase 1	ATE1	LIDRGWRRSGKYVYKPVMNQTCCPQYTIRCR	608	P	3	1187		1	3.51405e-05	121.27	113.31	121.27	-0.017701	101500000	65	71.8036	1	1	NaN	113.47	121.27	NaN	1	70.019	3.51405e-05	113.47	NaN	NaN	NaN	NaN	NaN	NaN	NaN	NaN	NaN	NaN	NaN	NaN	NaN	NaN	NaN	NaN	NaN	NaN	NaN
O95319	110	O95319	O95319	CUGBP Elav-like family member 2	CELF2	AALEAQNALHNIKTLPGMHHPIQMKPADSEK	609	P	4	1198		0.525104	0.0163083	44.3	44.3	44.3	0.8029	20299000	110	0.805784	0.525104	NaN	NaN	44.3	NaN	NaN	NaN	NaN	NaN	NaN	NaN	NaN	NaN	NaN	NaN	NaN	NaN	NaN	0.525104	0.805784	0.0163083	44.3	NaN	NaN	NaN	NaN	NaN	NaN	NaN
O95340	514	O95340	O95340	Bifunctional 3'-phosphoadenosine 5'-phosphosulfate synthase 2;Sulfate adenylyltransferase;Adenylyl-sulfate kinase	PAPSS2	SRMIAGANFYIVGRDPAGMPHPETKKDLYEP	610	P	4	1200		0.896521	0.00110157	60.765	53.405	60.765	-2.7773	64363000	514	9.91374	0.889513	0.896521	NaN	58.974	60.765	NaN	NaN	NaN	NaN	NaN	0.889513	9.68674	0.00154397	58.974	NaN	NaN	NaN	NaN	NaN	NaN	NaN	NaN	NaN	NaN	NaN	NaN	NaN	NaN	NaN
O95340	540	O95340	O95340	Bifunctional 3'-phosphoadenosine 5'-phosphosulfate synthase 2;Sulfate adenylyltransferase;Adenylyl-sulfate kinase	PAPSS2	DLYEPTHGGKVLSMAPGLTSVEIIPFRVAAY	611	P	3	1200		1	0.000586267	89.506	54.686	89.506	0.14086	218710000	540	84.5046	NaN	NaN	1	NaN	NaN	89.506	NaN	NaN	NaN	NaN	NaN	NaN	NaN	NaN	NaN	NaN	NaN	NaN	NaN	NaN	NaN	NaN	NaN	NaN	NaN	NaN	NaN	NaN	NaN
O95347	1050	O95347	O95347	Structural maintenance of chromosomes protein 2	SMC2	QKVNKDFGSIFSTLLPGANAMLAPPEGQTVL	612	P	3	1202		0.940595	2.58436e-05	61.669	57.047	61.669	0.91249	415560000	1050	12.631	0.940595	NaN	NaN	61.669	NaN	NaN	0.940595	12.631	2.58436e-05	61.669	0.700008	5.08044	0.00870594	44.903	NaN	NaN	NaN	NaN	NaN	NaN	NaN	NaN	NaN	NaN	NaN	NaN	NaN	NaN	NaN
O95352	17	O95352	O95352	Ubiquitin-like modifier-activating enzyme ATG7	ATG7	AAATGDPGLSKLQFAPFSSALDVGFWHELTQ	613	P	3	1203		0.995814	0.000434879	52.669	37.389	52.669	-3.6974	0	17	23.7635	NaN	0.995814	NaN	NaN	52.669	NaN	NaN	NaN	NaN	NaN	NaN	NaN	NaN	NaN	NaN	NaN	NaN	NaN	NaN	NaN	NaN	NaN	NaN	NaN	NaN	NaN	NaN	NaN	NaN
O95352	290	O95352	O95352	Ubiquitin-like modifier-activating enzyme ATG7	ATG7	GARDVAHSIIFEVKLPEMAFSPDCPKAVGWE	614	P	3	1203		0.969503	3.8778e-05	87.326	77.609	87.326	1.106	52995000	290	15.1806	0.969503	0.808885	NaN	87.326	84.762	NaN	NaN	NaN	NaN	NaN	0.969503	15.1806	3.8778e-05	87.326	NaN	NaN	NaN	NaN	NaN	NaN	NaN	NaN	NaN	NaN	NaN	NaN	NaN	NaN	NaN
O95372	177	O95372	O95372	Acyl-protein thioesterase 2	LYPLA2	SAKDLAILQCHGELDPMVPVRFGALTAEKLR	615	P	3	1207		0.996932	2.07272e-06	151.54	131.44	138.97	0.43167	3146100000	177	25.118	0.987106	0.996932	0.990766	128.26	151.54	123.41	NaN	NaN	NaN	NaN	NaN	NaN	NaN	NaN	0.987106	18.8398	3.52511e-05	128.26	0.986362	18.5929	0.000494017	87.16	NaN	NaN	NaN	NaN	NaN	NaN	NaN
O95372	180	O95372	O95372	Acyl-protein thioesterase 2	LYPLA2	DLAILQCHGELDPMVPVRFGALTAEKLRSVV	616	P	4	1207		0.550057	0.000422327	56.46	45.753	56.46	1.2156	66683000	180	0.872539	0.550057	NaN	0.531505	56.46	NaN	51.844	NaN	NaN	NaN	NaN	NaN	NaN	NaN	NaN	NaN	NaN	NaN	NaN	0.550057	0.872539	0.000422327	56.46	NaN	NaN	NaN	NaN	NaN	NaN	NaN
O95372	73	O95372	O95372	Acyl-protein thioesterase 2	LYPLA2	HAPRIPVTLNMKMVMPSWFDLMGLSPDAPED	617	P	3	1207		0.993975	0.000149992	77.649	77.649	59.356	1.107	190410000	73	22.7802	0.993975	0.851905	0.990552	59.356	48.389	77.649	NaN	NaN	NaN	NaN	0.993975	22.7802	0.000424698	59.356	NaN	NaN	NaN	NaN	NaN	NaN	NaN	NaN	NaN	NaN	NaN	NaN	NaN	NaN	NaN
O95372	206	O95372	O95372	Acyl-protein thioesterase 2	LYPLA2	LRSVVTPARVQFKTYPGVMHSSCPQEMAAVK	618	P	4	1207		0.997	0.00050878	66.3	62.706	66.3	-1.6834	368050000	206	25.2161	0.986403	0.997	0.965133	47.728	66.3	41.853	NaN	NaN	NaN	NaN	NaN	NaN	NaN	NaN	NaN	NaN	NaN	NaN	0.89415	12.1825	0.00947608	47.728	NaN	NaN	NaN	NaN	0.986403	18.606	0.0469348
O95372	214	O95372	O95372	Acyl-protein thioesterase 2	LYPLA2	RVQFKTYPGVMHSSCPQEMAAVKEFLEKLLP	619	P	4	1207		0.986546	0.0218672	42.806	40.43	42.806	-0.89033	137240000	214	18.6528	0.986546	NaN	NaN	42.806	NaN	NaN	NaN	NaN	NaN	NaN	0.986546	18.6528	0.0218672	42.806	NaN	NaN	NaN	NaN	NaN	NaN	NaN	NaN	NaN	NaN	NaN	NaN	NaN	NaN	NaN
O95373	974	O95373	O95373	Importin-7	IPO7	YQIFKAIFQTIQNRNPVWYQALTHGLNEEQR	620	P	3	1208		1	0.0151485	69.071	63.104	69.071	-3.7516	0	974	69.0705	1	NaN	NaN	69.071	NaN	NaN	NaN	NaN	NaN	NaN	NaN	NaN	NaN	NaN	1	69.0705	0.0151485	69.071	NaN	NaN	NaN	NaN	NaN	NaN	NaN	NaN	NaN	NaN	NaN
O95373	537	O95373	O95373	Importin-7	IPO7	QVLISNQEKAKEYITPFIRPVMQALLHIIRE	621	P	5	1208		0.55427	5.52487e-07	67.459	63.719	46.783	1.3126	212830000	537	0.946501	0.5	0.539956	0.55427	53.968	53.615	67.459	NaN	NaN	NaN	NaN	0.5	0	8.47727e-05	53.968	NaN	NaN	NaN	NaN	NaN	NaN	NaN	NaN	NaN	NaN	NaN	NaN	NaN	NaN	NaN
O95373	541	O95373	O95373	Importin-7	IPO7	SNQEKAKEYITPFIRPVMQALLHIIRETEND	622	P	4	1208		0.99392	8.47727e-05	82.007	73.512	82.007	-0.1838	153660000	541	22.1345	0.5	NaN	0.99392	53.968	NaN	82.007	NaN	NaN	NaN	NaN	0.5	0	8.47727e-05	53.968	NaN	NaN	NaN	NaN	NaN	NaN	NaN	NaN	NaN	NaN	NaN	NaN	NaN	NaN	NaN
O95373	463	O95373	O95373	Importin-7	IPO7	IYKDQMEYMLQNHVFPLFSSELGYMRARACW	623	P	4	1208		1	0.00012431	77.641	72.973	41.939	0.29353	1218300000	463	41.9392	1	1	1	77.641	46.307	71.052	NaN	NaN	NaN	NaN	NaN	NaN	NaN	NaN	1	77.641	0.00012431	77.641	NaN	NaN	NaN	NaN	NaN	NaN	NaN	NaN	NaN	NaN	NaN
O95373	3	O95373	O95373	Importin-7	IPO7	_____________MDPNTIIEALRGTMDPAL	624	P	3	1208		0.998472	0.000271723	58.457	58.457	58.457	-0.16708	458750000	3	28.2077	NaN	0.998472	NaN	NaN	58.457	NaN	NaN	NaN	NaN	NaN	NaN	NaN	NaN	NaN	NaN	NaN	NaN	NaN	NaN	NaN	NaN	NaN	NaN	NaN	NaN	NaN	NaN	NaN	NaN
O95373	69	O95373	O95373	Importin-7	IPO7	QAGVIYLKNMITQYWPDRETAPGDISPYTIP	625	P	5	1208		0.991387	0.021784	47.537	45.782	41.133	-0.6876	52702000	69	20.9587	0.91992	0.991387	NaN	47.537	41.133	NaN	NaN	NaN	NaN	NaN	0.91992	10.5159	0.021784	47.537	NaN	NaN	NaN	NaN	NaN	NaN	NaN	NaN	NaN	NaN	NaN	NaN	NaN	NaN	NaN
O95373	75	O95373	O95373	Importin-7	IPO7	LKNMITQYWPDRETAPGDISPYTIPEEDRHC	626	P	5	1208		0.991387	0.021784	47.537	45.782	41.133	-0.6876	52702000	75	20.9587	0.977423	0.991387	NaN	47.537	41.133	NaN	NaN	NaN	NaN	NaN	0.977423	16.0491	0.021784	47.537	NaN	NaN	NaN	NaN	NaN	NaN	NaN	NaN	NaN	NaN	NaN	NaN	NaN	NaN	NaN
O95391	157	O95391	O95391	Pre-mRNA-splicing factor SLU7	SLU7	AKFTGTNIAPDEHVQPQLMFDYDGKRDRWNG	627	P	3	1212		0.997275	0.00015438	104.81	94.553	104.81	0.036538	19823000	157	25.6343	0.997275	NaN	NaN	104.81	NaN	NaN	NaN	NaN	NaN	NaN	NaN	NaN	NaN	NaN	0.997275	25.6343	0.00015438	104.81	NaN	NaN	NaN	NaN	NaN	NaN	NaN	NaN	NaN	NaN	NaN
O95391	25	O95391	O95391	Pre-mRNA-splicing factor SLU7	SLU7	NAAPLSGSKEMSLEEPKKMTREDWRKKKELE	628	P	3	1212		0.90854	3.29601e-05	78.202	66.237	78.202	1.5573	55632000	25	9.9711	NaN	0.90854	0.876092	NaN	78.202	49.25	NaN	NaN	NaN	NaN	NaN	NaN	NaN	NaN	NaN	NaN	NaN	NaN	NaN	NaN	NaN	NaN	NaN	NaN	NaN	NaN	NaN	NaN	NaN
O95394	160	O95394	O95394	Phosphoacetylglucosamine mutase	PGM3	TVLGGQFHDYGLLTTPQLHYMVYCRNTGGRY	629	P	4	1213		1	2.98539e-06	76.891	68.625	76.891	-0.57622	49712000	160	76.8912	NaN	NaN	1	NaN	NaN	76.891	NaN	NaN	NaN	NaN	NaN	NaN	NaN	NaN	NaN	NaN	NaN	NaN	NaN	NaN	NaN	NaN	NaN	NaN	NaN	NaN	NaN	NaN	NaN
O95394	261	O95394	O95394	Phosphoacetylglucosamine mutase	PGM3	NHLCGADFVKSHQKPPQGMEIKSNERCCSFD	630	P	2	1213		0.865932	0.0262145	143.96	123.26	143.96	0.13432	132430000	261	8.1016	0.865932	0.795772	NaN	143.96	127.51	NaN	0.865932	8.1016	0.0262145	143.96	NaN	NaN	NaN	NaN	NaN	NaN	NaN	NaN	NaN	NaN	NaN	NaN	NaN	NaN	NaN	NaN	NaN	NaN	NaN
O95425	888	O95425	O95425	Supervillin	SVIL	PAVNTSVSTVASTVAPMYAGDLRTKPPLDHN	631	P	3	1221		0.99541	0.0103014	42.708	36.274	42.708	0.95261	23260000	888	26.3072	0.99541	NaN	NaN	42.708	NaN	NaN	0.99541	26.3072	0.0103014	42.708	0	0	NaN	NaN	NaN	NaN	NaN	NaN	NaN	NaN	NaN	NaN	NaN	NaN	NaN	NaN	NaN	NaN	NaN
O95425	1080	O95425	O95425	Supervillin	SVIL	QTGTAAGKTIAQTTAPVSWKPQDSSEQPQEK	632	P	3	1221		0.989807	0.0330193	56.72	54.034	56.72	-2.2935	33507000	1080	19.8203	0.989807	NaN	NaN	56.72	NaN	NaN	0.989807	19.8203	0.0330193	56.72	NaN	NaN	NaN	NaN	NaN	NaN	NaN	NaN	NaN	NaN	NaN	NaN	NaN	NaN	NaN	NaN	NaN	NaN	NaN
O95425	1085	O95425	O95425	Supervillin	SVIL	AGKTIAQTTAPVSWKPQDSSEQPQEKLCKNP	633	P	3	1221		0.988134	0.0330193	56.72	54.034	56.72	-2.2935	33507000	1085	19.1601	0.988134	NaN	NaN	56.72	NaN	NaN	0.988134	19.1601	0.0330193	56.72	NaN	NaN	NaN	NaN	NaN	NaN	NaN	NaN	NaN	NaN	NaN	NaN	NaN	NaN	NaN	NaN	NaN	NaN	NaN
O95433	266	O95433	O95433	Activator of 90 kDa heat shock protein ATPase homolog 1	AHSA1	HMVDGNVSGEFTDLVPEKHIVMKWRFKSWPE	634	P	5	1224		1	0.000345976	67.364	58.397	67.364	-1.093	632780000	266	67.3644	1	1	NaN	42.904	67.364	NaN	NaN	NaN	NaN	NaN	1	42.9036	0.0177048	42.904	NaN	NaN	NaN	NaN	NaN	NaN	NaN	NaN	NaN	NaN	NaN	NaN	NaN	NaN	NaN
O95433	128	O95433	O95433	Activator of 90 kDa heat shock protein ATPase homolog 1	AHSA1	SVDEVEISVSLAKDEPDTNLVALMKEEGVKL	635	P	5	1224		1	2.24948e-11	79.649	75.978	79.649	-1.5997	95466000	128	63.5742	NaN	1	0.999837	NaN	79.649	41.097	NaN	NaN	NaN	NaN	NaN	NaN	NaN	NaN	NaN	NaN	NaN	NaN	NaN	NaN	NaN	NaN	NaN	NaN	NaN	NaN	NaN	NaN	NaN
O95571	242	O95571	O95571	Persulfide dioxygenase ETHE1, mitochondrial	ETHE1	GNLNLPKPQQIDFAVPANMRCGVQTPTA___	636	P	3	1241		0.999881	1.75346e-05	86.748	86.748	86.748	0.17183	41978000	242	40.2873	0.999881	NaN	NaN	86.748	NaN	NaN	NaN	NaN	NaN	NaN	NaN	NaN	NaN	NaN	0.999881	40.2873	1.75346e-05	86.748	NaN	NaN	NaN	NaN	NaN	NaN	NaN	NaN	NaN	NaN	NaN
O95573	272	O95573	O95573	Long-chain-fatty-acid--CoA ligase 3	ACSL3	AAVEALGAKASMENQPHSKPLPSDIAVIMYT	637	P	4	1242		0.333065	0.00494518	40.837	40.837	40.837	-0.37125	0	272	0	0.333065	0.333036	NaN	40.837	40.254	NaN	NaN	NaN	NaN	NaN	NaN	NaN	NaN	NaN	0.333065	0	0.00906261	40.837	NaN	NaN	NaN	NaN	NaN	NaN	NaN	NaN	NaN	NaN	NaN
O95573	276	O95573	O95573	Long-chain-fatty-acid--CoA ligase 3	ACSL3	ALGAKASMENQPHSKPLPSDIAVIMYTSGST	638	P	4	1242		0.333065	0.00494518	40.837	40.837	40.837	-0.37125	0	276	0	0.333065	0.333036	NaN	40.837	40.254	NaN	NaN	NaN	NaN	NaN	NaN	NaN	NaN	NaN	0.333065	0	0.00906261	40.837	NaN	NaN	NaN	NaN	NaN	NaN	NaN	NaN	NaN	NaN	NaN
O95573	278	O95573	O95573	Long-chain-fatty-acid--CoA ligase 3	ACSL3	GAKASMENQPHSKPLPSDIAVIMYTSGSTGL	639	P	4	1242		0.415306	6.1659e-06	75.174	68.762	75.174	2.6453	0	278	1.04313	0.415306	0.333036	NaN	75.174	40.254	NaN	NaN	NaN	NaN	NaN	NaN	NaN	NaN	NaN	0.333065	0	0.00906261	40.837	0.415306	1.04313	6.1659e-06	75.174	NaN	NaN	NaN	NaN	NaN	NaN	NaN
O95573	83	O95573	O95573	Long-chain-fatty-acid--CoA ligase 3	ACSL3	YRSVNSLDGLASVLYPGCDTLDKVFTYAKNK	640	P	2	1242		1	0.00250513	85.837	73.07	85.837	-0.25815	17573000	83	85.8373	1	NaN	NaN	85.837	NaN	NaN	NaN	NaN	NaN	NaN	NaN	NaN	NaN	NaN	NaN	NaN	NaN	NaN	NaN	NaN	NaN	NaN	NaN	NaN	NaN	NaN	1	85.8373	0.00250513
O95602	962	O95602	O95602	DNA-directed RNA polymerase I subunit RPA1	POLR1A	AGGFVTGRFLTGIKPPEFFFHCMAGREGLVD	641	P	4	1243		0.754696	0.0198448	42.321	30.356	42.321	1.1905	27427000	962	4.88068	NaN	0.754696	NaN	NaN	42.321	NaN	NaN	NaN	NaN	NaN	NaN	NaN	NaN	NaN	NaN	NaN	NaN	NaN	NaN	NaN	NaN	NaN	NaN	NaN	NaN	NaN	NaN	NaN	NaN
O95602	1495	O95602	O95602	DNA-directed RNA polymerase I subunit RPA1	POLR1A	LTQPRKPTHSQEPQGPEAMERRVQAVREIHP	642	P	3	1243		0.998244	0.00134075	93.495	81.645	93.495	-1.6881	53400000	1495	27.5459	0.998244	NaN	0.988083	93.495	NaN	82.877	NaN	NaN	NaN	NaN	0.998244	27.5459	0.00573422	93.495	NaN	NaN	NaN	NaN	NaN	NaN	NaN	NaN	NaN	NaN	NaN	NaN	NaN	NaN	NaN
O95602	1668	O95602	O95602	DNA-directed RNA polymerase I subunit RPA1	POLR1A	VYKPLNRFGIRSNSSPLQQMTFETSFQFLKQ	643	P	3	1243		1	7.74799e-05	97.284	94.046	97.284	-1.2527	103760000	1668	97.2844	NaN	NaN	1	NaN	NaN	97.284	NaN	NaN	NaN	NaN	NaN	NaN	NaN	NaN	NaN	NaN	NaN	NaN	NaN	NaN	NaN	NaN	NaN	NaN	NaN	NaN	NaN	NaN	NaN
O95602	447	O95602	O95602	DNA-directed RNA polymerase I subunit RPA1	POLR1A	MMGKRVDYAARSVICPDMYINTNEIGIPMVF	644	P	3	1243		1	3.91039e-07	115.31	115.31	73.546	-0.74237	319250000	447	73.5464	1	1	0	102.78	115.31	NaN	NaN	NaN	NaN	NaN	1	71.08	0.0166683	71.08	NaN	NaN	NaN	NaN	1	73.5464	3.08359e-06	102.78	NaN	NaN	NaN	NaN	NaN	NaN	NaN
O95602	459	O95602	O95602	DNA-directed RNA polymerase I subunit RPA1	POLR1A	VICPDMYINTNEIGIPMVFATKLTYPQPVTP	645	P	3	1243		1	3.91039e-07	115.31	115.31	73.546	-0.74237	711880000	459	73.5464	1	1	1	110.57	115.31	101.39	NaN	NaN	NaN	NaN	1	71.08	1.7191e-06	110.57	1	74.2887	6.48646e-06	102.38	1	73.5464	3.08359e-06	102.78	NaN	NaN	NaN	NaN	NaN	NaN	NaN
O95602	729	O95602	O95602	DNA-directed RNA polymerase I subunit RPA1	POLR1A	KAWVKETPRSVPGFNPDSMCESQVIIREGEL	646	P	3	1243		0.96737	0.0038394	65.107	60.105	65.107	0.209	140910000	729	14.7198	NaN	0.96737	NaN	NaN	65.107	NaN	NaN	NaN	NaN	NaN	NaN	NaN	NaN	NaN	NaN	NaN	NaN	NaN	NaN	NaN	NaN	NaN	NaN	NaN	NaN	NaN	NaN	NaN	NaN
O95602	1262	O95602	O95602	DNA-directed RNA polymerase I subunit RPA1	POLR1A	RLREILMVASANIKTPMMSVPVLNTKKALKR	647	P	3	1243		0.999964	0.00842497	69.352	69.352	69.352	-0.42145	240760000	1262	44.8216	0.999964	0.999251	0.999494	69.352	54.276	47.227	NaN	NaN	NaN	NaN	0.999964	44.8216	0.00842497	69.352	NaN	NaN	NaN	NaN	NaN	NaN	NaN	NaN	NaN	NaN	NaN	NaN	NaN	NaN	NaN
O95613	1758	O95613	O95613	Pericentrin	PCNT	HEVIEKLQHELSLMGPVVHEVSDSQAGSLQS	648	P	4	1244		0.999919	0.000589838	40.937	36.405	40.937	-0.13715	5939000	1758	40.8892	NaN	NaN	0.999919	NaN	NaN	40.937	NaN	NaN	NaN	NaN	NaN	NaN	NaN	NaN	NaN	NaN	NaN	NaN	NaN	NaN	NaN	NaN	NaN	NaN	NaN	NaN	NaN	NaN	NaN
O95630	260	O95630	O95630	STAM-binding protein	STAMBP	SESIPTIDGLRHVVVPGRLCPQFLQLASANT	649	P	4	1249		0.5	0.0262441	48.656	41.462	48.656	0.49585	2051900	260	0	0.5	NaN	NaN	48.656	NaN	NaN	NaN	NaN	NaN	NaN	NaN	NaN	NaN	NaN	NaN	NaN	NaN	NaN	NaN	NaN	NaN	NaN	0.5	0	0.0262441	48.656	NaN	NaN	NaN
O95630	265	O95630	O95630	STAM-binding protein	STAMBP	TIDGLRHVVVPGRLCPQFLQLASANTARGVE	650	P	4	1249		0.5	0.0262441	48.656	41.462	48.656	0.49585	2051900	265	0	0.5	NaN	NaN	48.656	NaN	NaN	NaN	NaN	NaN	NaN	NaN	NaN	NaN	NaN	NaN	NaN	NaN	NaN	NaN	NaN	NaN	NaN	0.5	0	0.0262441	48.656	NaN	NaN	NaN
O95639	172	O95639	O95639	Cleavage and polyadenylation specificity factor subunit 4	CPSF4	PEGPSCKFMHPRFELPMGTTEQPPLPQQTQP	651	P	3	1251		0.99688	0.0298191	57.826	47.977	57.826	-2.1801	72675000	172	25.4893	NaN	0.99688	NaN	NaN	57.826	NaN	NaN	NaN	NaN	NaN	NaN	NaN	NaN	NaN	NaN	NaN	NaN	NaN	NaN	NaN	NaN	NaN	NaN	NaN	NaN	NaN	NaN	NaN	NaN
O95696	687	O95696	O95696	Bromodomain-containing protein 1	BRD1	SIGLEEASGMHLPERPAAAPRRPFSWEDVDR	652	P	4	1258		0.449132	0.00390446	56.947	38.066	56.947	1.1365	0	687	0	NaN	0.449132	NaN	NaN	56.947	NaN	NaN	NaN	NaN	NaN	NaN	NaN	NaN	NaN	NaN	NaN	NaN	NaN	NaN	NaN	NaN	NaN	NaN	NaN	NaN	NaN	NaN	NaN	NaN
O95696	691	O95696	O95696	Bromodomain-containing protein 1	BRD1	EEASGMHLPERPAAAPRRPFSWEDVDRLLDP	653	P	4	1258		0.449132	0.00390446	56.947	38.066	56.947	1.1365	0	691	0	NaN	0.449132	NaN	NaN	56.947	NaN	NaN	NaN	NaN	NaN	NaN	NaN	NaN	NaN	NaN	NaN	NaN	NaN	NaN	NaN	NaN	NaN	NaN	NaN	NaN	NaN	NaN	NaN	NaN
O95714	354	O95714	O95714	E3 ubiquitin-protein ligase HERC2	HERC2	PLLQRFQSIICRKDAPHSEGDMHLLSGPLSP	654	P	4	1260		0.999909	6.87204e-05	77.681	64.878	77.681	-0.66197	17072000	354	40.4529	NaN	0.999909	NaN	NaN	77.681	NaN	NaN	NaN	NaN	NaN	NaN	NaN	NaN	NaN	NaN	NaN	NaN	NaN	NaN	NaN	NaN	NaN	NaN	NaN	NaN	NaN	NaN	NaN	NaN
O95714	4332	O95714	O95714	E3 ubiquitin-protein ligase HERC2	HERC2	STSKPASAGKLPAQVPMEYNHLQEIPIIALR	655	P	3	1260		0.999999	1.7144e-07	104.84	97.215	104.84	-0.71398	29470000	4332	61.3404	NaN	0.999999	NaN	NaN	104.84	NaN	NaN	NaN	NaN	NaN	NaN	NaN	NaN	NaN	NaN	NaN	NaN	NaN	NaN	NaN	NaN	NaN	NaN	NaN	NaN	NaN	NaN	NaN	NaN
O95747;Q9UEW8	190;236	O95747;Q9UEW8	O95747	Serine/threonine-protein kinase OSR1;STE20/SPS1-related proline-alanine-rich protein kinase	OXSR1;STK39	GDITRNKVRKTFVGTPCWMAPEVMEQVRGYD;GDVTRNKVRKTFVGTPCWMAPEVMEQVRGYD	656	P	3	1263;8984		0.995704	0.00297555	82.362	82.362	62.475	-1.2944	72829000	190	23.6511	NaN	0.981354	0.995704	NaN	82.362	62.475	NaN	NaN	NaN	NaN	NaN	NaN	NaN	NaN	NaN	NaN	NaN	NaN	NaN	NaN	NaN	NaN	NaN	NaN	NaN	NaN	NaN	NaN	NaN
O95747	244	O95747	O95747	Serine/threonine-protein kinase OSR1	OXSR1	KYPPMKVLMLTLQNDPPSLETGVQDKEMLKK	657	P	3	1263		0.5	0.0061278	52.03	44.999	52.03	0.50928	17848000	244	0	NaN	0.5	NaN	NaN	52.03	NaN	NaN	NaN	NaN	NaN	NaN	NaN	NaN	NaN	NaN	NaN	NaN	NaN	NaN	NaN	NaN	NaN	NaN	NaN	NaN	NaN	NaN	NaN	NaN
O95747	245	O95747	O95747	Serine/threonine-protein kinase OSR1	OXSR1	YPPMKVLMLTLQNDPPSLETGVQDKEMLKKY	658	P	3	1263		0.873673	8.56051e-05	112.58	94.283	112.58	-1.3907	128710000	245	8.39853	0.852754	0.873673	NaN	65.454	112.58	NaN	NaN	NaN	NaN	NaN	NaN	NaN	NaN	NaN	0.852754	7.62782	0.00171024	65.454	NaN	NaN	NaN	NaN	NaN	NaN	NaN	NaN	NaN	NaN	NaN
O95757	809	O95757	O95757	Heat shock 70 kDa protein 4L	HSPA4L	EVPEDKPKANSEHNGPMDGQSGTETKSDSTK	659	P	3	1268		1	0.000124653	108.5	103.86	108.5	-2.9866	0	809	108.495	NaN	1	NaN	NaN	108.5	NaN	NaN	NaN	NaN	NaN	NaN	NaN	NaN	NaN	NaN	NaN	NaN	NaN	NaN	NaN	NaN	NaN	NaN	NaN	NaN	NaN	NaN	NaN	NaN
O95757	511	O95757	O95757	Heat shock 70 kDa protein 4L	HSPA4L	SVIEKQNLEGDHSDAPMETETSFKNENKDNM	660	P	3	1268		1	0.00856613	58.073	54.975	48.112	-1.1712	115330000	511	48.1118	1	1	1	58.073	48.112	50.358	0	0	NaN	NaN	NaN	NaN	NaN	NaN	NaN	NaN	NaN	NaN	NaN	NaN	NaN	NaN	1	58.0727	0.00856613	58.073	NaN	NaN	NaN
O95757	319	O95757	O95757	Heat shock 70 kDa protein 4L	HSPA4L	AQFEQLCASLLARVEPPLKAVMEQANLQRED	661	P	4	1268		0.549183	0.000937423	53.259	42.837	53.259	0.92236	109600000	319	0.857165	NaN	0.549183	NaN	NaN	53.259	NaN	NaN	NaN	NaN	NaN	NaN	NaN	NaN	NaN	NaN	NaN	NaN	NaN	NaN	NaN	NaN	NaN	NaN	NaN	NaN	NaN	NaN	NaN	NaN
O95782	898	O95782	O95782	AP-2 complex subunit alpha-1	AP2A1	SLPQQEAQKIFKANHPMDAEVTKAKLLGFGS	662	P	2	1273		1	0.000233826	120.57	107.62	115.57	0.020265	21730000	898	115.574	1	NaN	1	115.57	NaN	120.57	NaN	NaN	NaN	NaN	1	115.574	0.0412848	115.57	NaN	NaN	NaN	NaN	NaN	NaN	NaN	NaN	NaN	NaN	NaN	NaN	NaN	NaN	NaN
O95782	490	O95782	O95782	AP-2 complex subunit alpha-1	AP2A1	VQGYAAKTVFEALQAPACHENMVKVGGYILG	663	P	2	1273		1	9.09322e-07	119.76	77.208	119.76	-3.2218	0	490	119.764	NaN	1	NaN	NaN	119.76	NaN	NaN	NaN	NaN	NaN	NaN	NaN	NaN	NaN	NaN	NaN	NaN	NaN	NaN	NaN	NaN	NaN	NaN	NaN	NaN	NaN	NaN	NaN	NaN
O95793	564	O95793	O95793	Double-stranded RNA-binding protein Staufen homolog 1	STAU1	ILKLLSELDQQSTEMPRTGNGPMSVCGRC__	664	P	3	1277		1	0.00882542	89.548	73.41	68.83	2.4642	18407000	564	68.8302	1	NaN	1	89.548	NaN	68.83	NaN	NaN	NaN	NaN	NaN	NaN	NaN	NaN	NaN	NaN	NaN	NaN	1	89.5479	0.0421581	89.548	NaN	NaN	NaN	NaN	NaN	NaN	NaN
O95817	174	O95817	O95817	BAG family molecular chaperone regulator 3	BAG3	AAQPPASHGPERSQSPAASDCSSSSSSASLP	665	P	3	1281		0.998703	0.0080483	50.215	46.927	50.215	-0.11826	7219800	174	28.8658	0.998703	NaN	NaN	50.215	NaN	NaN	NaN	NaN	NaN	NaN	NaN	NaN	NaN	NaN	NaN	NaN	NaN	NaN	0.998703	28.8658	0.0080483	50.215	NaN	NaN	NaN	NaN	NaN	NaN	NaN
O95817	305	O95817	O95817	BAG family molecular chaperone regulator 3	BAG3	PSPIRVHTVVDRPQQPMTHRETAPVSQPENK	666	P	4	1281	+	0.999769	0.000395732	90.367	63.595	90.367	0.17898	222190000	305	36.3717	NaN	NaN	0.999769	NaN	NaN	90.367	NaN	NaN	NaN	NaN	NaN	NaN	NaN	NaN	NaN	NaN	NaN	NaN	NaN	NaN	NaN	NaN	NaN	NaN	NaN	NaN	NaN	NaN	NaN
O95817	372	O95817	O95817	BAG family molecular chaperone regulator 3	BAG3	PPSEKVEVKVPPAPVPCPPPSPGPSAVPSSP	667	P	3	1281		0.967909	7.33709e-08	103.27	99.829	103.27	-0.11947	54954000	372	17.9201	0.967909	0.861552	NaN	103.27	49.577	NaN	NaN	NaN	NaN	NaN	NaN	NaN	NaN	NaN	NaN	NaN	NaN	NaN	NaN	NaN	NaN	NaN	0.967909	17.9201	7.33709e-08	103.27	0.867521	10.3807	9.82091e-05
O95819	895	O95819	O95819	Mitogen-activated protein kinase kinase kinase kinase 4	MAP4K4	GFSCDGMRPEAIRQDPTRKGSVVNVNPTNTR	668	P	4	1282		0.519169	0.00130674	48.204	40.945	48.204	-0.79409	10571000	895	0.485131	NaN	NaN	0.519169	NaN	NaN	48.204	NaN	NaN	NaN	NaN	NaN	NaN	NaN	NaN	NaN	NaN	NaN	NaN	NaN	NaN	NaN	NaN	NaN	NaN	NaN	NaN	NaN	NaN	NaN
O95819	825	O95819	O95819	Mitogen-activated protein kinase kinase kinase kinase 4	MAP4K4	ESVKTMIVHDDVESEPAMTPSKEGTLIVRQT	669	P	3	1282		0.989398	0.0177829	50.387	41.34	50.387	0.12749	17761000	825	19.7032	0.989398	NaN	NaN	50.387	NaN	NaN	NaN	NaN	NaN	NaN	NaN	NaN	NaN	NaN	NaN	NaN	NaN	NaN	NaN	NaN	NaN	NaN	0.989398	19.7032	0.0177829	50.387	NaN	NaN	NaN
O95831	335	O95831	O95831	Apoptosis-inducing factor 1, mitochondrial	AIFM1	GRKARALGTEVIQLFPEKGNMGKILPEYLSN	670	P	3	1285	+	1	0.000906935	76.151	61.228	65.107	0.36962	80458000	335	65.1068	NaN	1	1	NaN	76.151	65.107	NaN	NaN	NaN	NaN	NaN	NaN	NaN	NaN	NaN	NaN	NaN	NaN	NaN	NaN	NaN	NaN	NaN	NaN	NaN	NaN	NaN	NaN	NaN
O95831	169	O95831	O95831	Apoptosis-inducing factor 1, mitochondrial	AIFM1	DPGARVLIVSEDPELPYMRPPLSKELWFSDD	671	P	3	1285		0.969847	0.00607401	80.07	71.128	78.661	0.25409	3009500000	169	18.6268	0.969847	0.826875	0.905949	80.07	68.567	78.516	NaN	NaN	NaN	NaN	0.969847	18.6268	0.00684567	78.661	NaN	NaN	NaN	NaN	0.866656	11.4174	0.00607401	80.07	NaN	NaN	NaN	NaN	NaN	NaN	NaN
O95831	173	O95831	O95831	Apoptosis-inducing factor 1, mitochondrial	AIFM1	RVLIVSEDPELPYMRPPLSKELWFSDDPNVT	672	P	4	1285		0.648097	0.00309106	63.337	44.045	46.783	0.90302	23890000	173	0	NaN	0.371823	0.648097	NaN	59.003	63.337	NaN	NaN	NaN	NaN	NaN	NaN	NaN	NaN	NaN	NaN	NaN	NaN	NaN	NaN	NaN	NaN	NaN	NaN	NaN	NaN	NaN	NaN	NaN
O95831	174	O95831	O95831	Apoptosis-inducing factor 1, mitochondrial	AIFM1	VLIVSEDPELPYMRPPLSKELWFSDDPNVTK	673	P	4	1285		0.648097	0.00309106	63.337	44.045	46.783	0.90302	23890000	174	0	NaN	0.371823	0.648097	NaN	59.003	63.337	NaN	NaN	NaN	NaN	NaN	NaN	NaN	NaN	NaN	NaN	NaN	NaN	NaN	NaN	NaN	NaN	NaN	NaN	NaN	NaN	NaN	NaN	NaN
O95834	35	O95834	O95834	Echinoderm microtubule-associated protein-like 2	EML2	SVKMFLRGRPVPMMIPDELAPTYSLDTRSEL	674	P	3	1286		0.496038	0.00763693	55.763	55.763	55.763	-1.3016	0	35	0.380505	0.496038	NaN	NaN	55.763	NaN	NaN	NaN	NaN	NaN	NaN	NaN	NaN	NaN	NaN	NaN	NaN	NaN	NaN	NaN	NaN	NaN	NaN	NaN	NaN	NaN	NaN	0.496038	0.380505	0.00763693
O95881	100	O95881	O95881	Thioredoxin domain-containing protein 12	TXNDC12	LSHNFVMVNLEDEEEPKDEDFSPDGGYIPRI	675	P	5	1298		0.92139	0.000135864	45.47	42.733	45.47	2.0617	13614000	100	10.8128	0.92139	NaN	NaN	45.47	NaN	NaN	0.92139	10.8128	0.000135864	45.47	NaN	NaN	NaN	NaN	NaN	NaN	NaN	NaN	NaN	NaN	NaN	NaN	NaN	NaN	NaN	NaN	NaN	NaN	NaN
O95985	392	O95985	O95985	DNA topoisomerase 3-beta-1	TOP3B	RPRKGHDAGDHPPITPMKSATEAELGGDAWR	676	P	3	1306		0.999368	0.000686884	86.548	75.913	80.361	-0.61487	20887000	392	32.4447	NaN	0.999368	NaN	NaN	86.548	NaN	NaN	NaN	NaN	NaN	NaN	NaN	NaN	NaN	NaN	NaN	NaN	NaN	NaN	NaN	NaN	NaN	NaN	NaN	NaN	NaN	NaN	NaN	NaN
O95985	318	O95985	O95985	DNA topoisomerase 3-beta-1	TOP3B	TVEMLRVASSSLGMGPQHAMQTAERLYTQGY	677	P	3	1306		1	0.00649292	55.864	46.284	55.864	-0.28281	17923000	318	55.8644	1	NaN	NaN	55.864	NaN	NaN	NaN	NaN	NaN	NaN	NaN	NaN	NaN	NaN	1	55.8644	0.00649292	55.864	NaN	NaN	NaN	NaN	NaN	NaN	NaN	NaN	NaN	NaN	NaN
O96005	220	O96005	O96005	Cleft lip and palate transmembrane protein 1	CLPTM1	FQKTKNLLTGETEADPEMIKRAEDYGPVEVI	678	P	3	1311		1	0.015782	89.283	65.194	82.813	-0.13928	2743400000	220	82.8131	1	1	1	82.813	89.283	72.446	1	67.6053	0.0778249	67.605	1	72.634	0.0425266	72.634	NaN	NaN	NaN	NaN	1	82.8131	0.015782	82.813	NaN	NaN	NaN	NaN	NaN	NaN	NaN
O96008	78	O96008	O96008	Mitochondrial import receptor subunit TOM40 homolog	TOMM40	ASASGAAEDGACGCLPNPGTFEECHRKCKEL	679	P	4	1314		0.999906	6.29648e-07	109.08	107.46	40.456	-0.24079	860810000	78	40.2704	0.999906	0.94186	0.884464	109.08	98.236	70.889	0.934548	11.5468	5.04516e-05	105.58	0.733018	4.39513	0.0100804	49.588	NaN	NaN	NaN	NaN	0.9071	9.89642	3.23518e-06	109.08	0.999906	40.2704	0.00365284	41.432	NaN	NaN	NaN
O96008	80	O96008	O96008	Mitochondrial import receptor subunit TOM40 homolog	TOMM40	ASGAAEDGACGCLPNPGTFEECHRKCKELFP	680	P	4	1314		0.999906	0.0114647	40.456	38.67	40.456	-0.24079	15314000	80	40.2704	0.999906	NaN	NaN	40.456	NaN	NaN	NaN	NaN	NaN	NaN	NaN	NaN	NaN	NaN	NaN	NaN	NaN	NaN	0	0	NaN	NaN	0.999906	40.2704	0.0114647	40.456	NaN	NaN	NaN
O96013	284	O96013	O96013	Serine/threonine-protein kinase PAK 4	PAK4	PQLAPPACTPAAPAVPGPPGPRSPQREPQRV	681	P	4	1316		0.718848	1.94495e-05	48.08	46.147	48.08	-0.598	18065000	284	0	NaN	NaN	0.718848	NaN	NaN	48.08	NaN	NaN	NaN	NaN	NaN	NaN	NaN	NaN	NaN	NaN	NaN	NaN	NaN	NaN	NaN	NaN	NaN	NaN	NaN	NaN	NaN	NaN	NaN
O96013	286	O96013	O96013	Serine/threonine-protein kinase PAK 4	PAK4	LAPPACTPAAPAVPGPPGPRSPQREPQRVSH	682	P	4	1316		0.718848	1.94495e-05	48.08	46.147	48.08	-0.598	18065000	286	0	NaN	NaN	0.718848	NaN	NaN	48.08	NaN	NaN	NaN	NaN	NaN	NaN	NaN	NaN	NaN	NaN	NaN	NaN	NaN	NaN	NaN	NaN	NaN	NaN	NaN	NaN	NaN	NaN	NaN
O96013	287	O96013	O96013	Serine/threonine-protein kinase PAK 4	PAK4	APPACTPAAPAVPGPPGPRSPQREPQRVSHE	683	P	4	1316		0.718848	1.94495e-05	48.08	46.147	48.08	-0.598	18065000	287	0	NaN	NaN	0.718848	NaN	NaN	48.08	NaN	NaN	NaN	NaN	NaN	NaN	NaN	NaN	NaN	NaN	NaN	NaN	NaN	NaN	NaN	NaN	NaN	NaN	NaN	NaN	NaN	NaN	NaN
O96013	289	O96013	O96013	Serine/threonine-protein kinase PAK 4	PAK4	PACTPAAPAVPGPPGPRSPQREPQRVSHEQF	684	P	4	1316		0.718848	1.94495e-05	48.08	46.147	48.08	-0.598	18065000	289	0	NaN	NaN	0.718848	NaN	NaN	48.08	NaN	NaN	NaN	NaN	NaN	NaN	NaN	NaN	NaN	NaN	NaN	NaN	NaN	NaN	NaN	NaN	NaN	NaN	NaN	NaN	NaN	NaN	NaN
O96013	292	O96013	O96013	Serine/threonine-protein kinase PAK 4	PAK4	TPAAPAVPGPPGPRSPQREPQRVSHEQFRAA	685	P	4	1316		0.722024	1.94495e-05	48.08	46.147	48.08	-0.598	18065000	292	0	NaN	NaN	0.722024	NaN	NaN	48.08	NaN	NaN	NaN	NaN	NaN	NaN	NaN	NaN	NaN	NaN	NaN	NaN	NaN	NaN	NaN	NaN	NaN	NaN	NaN	NaN	NaN	NaN	NaN
O96013	296	O96013	O96013	Serine/threonine-protein kinase PAK 4	PAK4	PAVPGPPGPRSPQREPQRVSHEQFRAALQLV	686	P	4	1316		0.7311	1.94495e-05	48.08	46.147	48.08	-0.598	18065000	296	0.209149	NaN	NaN	0.7311	NaN	NaN	48.08	NaN	NaN	NaN	NaN	NaN	NaN	NaN	NaN	NaN	NaN	NaN	NaN	NaN	NaN	NaN	NaN	NaN	NaN	NaN	NaN	NaN	NaN	NaN
O96019	219	O96019	O96019	Actin-like protein 6A	ACTL6A	MQCRELFQEMNIELVPPYMIASKEAVREGSP	687	P	3	1319		0.625568	0.000184192	92.671	85.399	92.671	0.42679	216320000	219	2.22901	0.625568	0.610006	NaN	92.671	84.208	NaN	0	0	NaN	NaN	NaN	NaN	NaN	NaN	0.625568	2.22901	0.000184192	92.671	NaN	NaN	NaN	NaN	NaN	NaN	NaN	NaN	NaN	NaN	NaN
O96019	220	O96019	O96019	Actin-like protein 6A	ACTL6A	QCRELFQEMNIELVPPYMIASKEAVREGSPA	688	P	2	1319		0.77545	0.00092916	89.26	89.26	89.26	0.37734	17154000	220	5.38257	0	NaN	0.77545	NaN	NaN	89.26	0	0	NaN	NaN	NaN	NaN	NaN	NaN	NaN	NaN	NaN	NaN	NaN	NaN	NaN	NaN	NaN	NaN	NaN	NaN	NaN	NaN	NaN
O96019	119	O96019	O96019	Actin-like protein 6A	ACTL6A	DHTYKMHVKSEASLHPVLMSEAPWNTRAKRE	689	P	2	1319		1	0.00444643	85.288	57.879	70.488	-0.048996	45361000	119	70.4884	1	1	0.879521	70.488	80.979	85.288	NaN	NaN	NaN	NaN	0	0	NaN	NaN	1	70.4884	0.049746	70.488	NaN	NaN	NaN	NaN	NaN	NaN	NaN	NaN	NaN	NaN	NaN
O96019	126	O96019	O96019	Actin-like protein 6A	ACTL6A	VKSEASLHPVLMSEAPWNTRAKREKLTELMF	690	P	2	1319		1	0.0024921	80.979	60.026	70.488	-0.048996	96482000	126	70.4884	1	1	NaN	70.488	80.979	NaN	NaN	NaN	NaN	NaN	0.999985	48.3257	0.0024921	63.918	1	70.4884	0.049746	70.488	NaN	NaN	NaN	NaN	NaN	NaN	NaN	NaN	NaN	NaN	NaN
O96028	137	O96028	O96028	Histone-lysine N-methyltransferase NSD2	WHSC1	PEIKLKITKTYMNGKPLFESSICGDSAADVS	691	P	4	1321		0.999999	6.09739e-07	63.033	59.218	63.033	0.16522	127020000	137	59.7804	0.999999	NaN	0.999997	63.033	NaN	55.033	NaN	NaN	NaN	NaN	0.999999	59.7804	6.09739e-07	63.033	NaN	NaN	NaN	NaN	0.999961	44.0888	0.00255075	45.527	NaN	NaN	NaN	NaN	NaN	NaN	NaN
P00338	292	P00338	P00338	L-lactate dehydrogenase A chain	LDHA	IKGLYGIKDDVFLSVPCILGQNGISDLVKVT	692	P	4	1325		1	1.39948e-17	155.88	145.96	56.239	0.1401	6941100000	292	56.239	1	1	1	145.79	154.47	155.88	NaN	NaN	NaN	NaN	1	59.5791	6.0317e-11	141.36	1	107.977	1.90621e-11	145.79	NaN	NaN	NaN	NaN	NaN	NaN	NaN	NaN	1	46.9378	0.0555376
P00338	182	P00338	P00338	L-lactate dehydrogenase A chain	LDHA	SARFRYLMGERLGVHPLSCHGWVLGEHGDSS	693	P	4	1325		1	1.88804e-13	91.942	87.227	40.671	0.3751	5701100000	182	40.6711	1	1	1	91.407	91.942	63.033	0.997681	26.3366	0.000194989	62.302	0	0	NaN	NaN	1	40.6711	6.45836e-06	91.407	1	54.3263	8.56819e-06	54.326	NaN	NaN	NaN	NaN	NaN	NaN	NaN
P00338	199	P00338	P00338	L-lactate dehydrogenase A chain	LDHA	SCHGWVLGEHGDSSVPVWSGMNVAGVSLKTL	694	P	4	1325		1	2.40355e-08	91.398	86.589	40.671	0.3751	6312700000	199	40.6711	1	1	1	91.398	76.956	63.033	NaN	NaN	NaN	NaN	0.999999	60.5086	5.72679e-08	91.398	1	40.6711	6.77398e-05	55.033	1	54.3263	8.56819e-06	54.326	NaN	NaN	NaN	NaN	NaN	NaN	NaN
P00374	104	P00374	P00374	Dihydrofolate reductase	DHFR	FLSRSLDDALKLTEQPELANKVDMVWIVGGS	695	P	3	1327		1	0.0183291	58.373	45.571	58.373	0.90209	14592000	104	58.3734	NaN	NaN	1	NaN	NaN	58.373	NaN	NaN	NaN	NaN	NaN	NaN	NaN	NaN	NaN	NaN	NaN	NaN	NaN	NaN	NaN	NaN	NaN	NaN	NaN	NaN	NaN	NaN	NaN
P00387	186	P00387	P00387	NADH-cytochrome b5 reductase 3;NADH-cytochrome b5 reductase 3 membrane-bound form;NADH-cytochrome b5 reductase 3 soluble form	CYB5R3	TVKSVGMIAGGTGITPMLQVIRAIMKDPDDH	696	P	2	1328		1	1.6995e-31	205.26	195.98	205.26	-0.12019	340800000	186	205.258	1	1	1	108.23	155.08	205.26	NaN	NaN	NaN	NaN	NaN	NaN	NaN	NaN	1	108.232	3.26779e-05	108.23	NaN	NaN	NaN	NaN	NaN	NaN	NaN	NaN	NaN	NaN	NaN
P00390	449	P00390	P00390	Glutathione reductase, mitochondrial	GSR	KYGIENVKTYSTSFTPMYHAVTKRKTKCVMK	697	P	2	1329		1	0.00172659	137.59	126.49	110.98	1.0397	621860000	449	110.977	NaN	1	1	NaN	137.59	118.87	NaN	NaN	NaN	NaN	NaN	NaN	NaN	NaN	NaN	NaN	NaN	NaN	NaN	NaN	NaN	NaN	NaN	NaN	NaN	NaN	NaN	NaN	NaN
P00395	488	P00395	P00395	Cytochrome c oxidase subunit 1	MT-CO1	WEAFASKRKVLMVEEPSMNLEWLYGCPPPYH	698	P	4	1330		0.999094	1.20977e-07	107.76	107.76	54.934	-2.2186	1274300000	488	31.7432	0.986972	0.950621	0.999094	99.34	107.76	94.006	NaN	NaN	NaN	NaN	0.986972	19.3301	3.76215e-05	84.097	0.972824	17.1829	1.20977e-07	99.34	NaN	NaN	NaN	NaN	NaN	NaN	NaN	NaN	NaN	NaN	NaN
P00395	499	P00395	P00395	Cytochrome c oxidase subunit 1	MT-CO1	MVEEPSMNLEWLYGCPPPYHTFEEPVYMKS_	699	P	3	1330		0.756836	5.89242e-06	96.568	96.568	61.911	-0.084549	75859000	499	5.8898	NaN	0.756836	0.305224	NaN	93.147	96.568	NaN	NaN	NaN	NaN	NaN	NaN	NaN	NaN	NaN	NaN	NaN	NaN	NaN	NaN	NaN	NaN	NaN	NaN	NaN	NaN	NaN	NaN	NaN
P00395	500	P00395	P00395	Cytochrome c oxidase subunit 1	MT-CO1	VEEPSMNLEWLYGCPPPYHTFEEPVYMKS__	700	P	3	1330		0.457379	0.000131812	93.147	93.147	93.147	0.14317	0	500	0	NaN	0.457379	NaN	NaN	93.147	NaN	NaN	NaN	NaN	NaN	NaN	NaN	NaN	NaN	NaN	NaN	NaN	NaN	NaN	NaN	NaN	NaN	NaN	NaN	NaN	NaN	NaN	NaN	NaN
P00395	501	P00395	P00395	Cytochrome c oxidase subunit 1	MT-CO1	EEPSMNLEWLYGCPPPYHTFEEPVYMKS___	701	P	4	1330		0.522982	0.00150903	54.934	54.934	54.934	-2.2186	93410000	501	4.06877	NaN	0.291965	0.522982	NaN	47.73	54.934	NaN	NaN	NaN	NaN	NaN	NaN	NaN	NaN	NaN	NaN	NaN	NaN	NaN	NaN	NaN	NaN	NaN	NaN	NaN	NaN	NaN	NaN	NaN
P00395	508	P00395	P00395	Cytochrome c oxidase subunit 1	MT-CO1	EWLYGCPPPYHTFEEPVYMKS__________	702	P	3	1330		0.954291	8.36595e-06	97.819	97.819	80.904	0.33801	409280000	508	17.5428	NaN	0.915684	0.954291	NaN	52.685	97.819	NaN	NaN	NaN	NaN	NaN	NaN	NaN	NaN	NaN	NaN	NaN	NaN	NaN	NaN	NaN	NaN	NaN	NaN	NaN	NaN	NaN	NaN	NaN
P00403	208	P00403	P00403	Cytochrome c oxidase subunit 2	MT-CO2	YGQCSEICGANHSFMPIVLELIPLKIFEMGP	703	P	3	1331		0.996852	6.83566e-06	53.648	49.574	53.648	-0.65283	70559000	208	25.7323	0.996852	NaN	NaN	53.648	NaN	NaN	NaN	NaN	NaN	NaN	NaN	NaN	NaN	NaN	0.996852	25.7323	6.83566e-06	53.648	NaN	NaN	NaN	NaN	NaN	NaN	NaN	NaN	NaN	NaN	NaN
P00403	166	P00403	P00403	Cytochrome c oxidase subunit 2	MT-CO2	RMMITSQDVLHSWAVPTLGLKTDAIPGRLNQ	704	P	4	1331		1	7.08938e-05	93.684	85.595	74.456	-0.12119	3941400000	166	74.4556	1	1	NaN	93.684	68.689	NaN	1	64.7223	7.83479e-05	93.684	1	47.7451	0.0025102	47.745	1	40.4278	0.000883203	73.783	1	74.4556	7.08938e-05	74.456	NaN	NaN	NaN	NaN	NaN	NaN	NaN
P00403	176	P00403	P00403	Cytochrome c oxidase subunit 2	MT-CO2	HSWAVPTLGLKTDAIPGRLNQTTFTATRPGV	705	P	4	1331		1	7.08938e-05	74.456	65.949	74.456	-0.12119	513960000	176	74.4556	1	1	NaN	74.456	68.689	NaN	1	64.7223	0.000213719	64.722	1	47.7451	0.0025102	47.745	1	40.4278	0.00640092	40.428	1	74.4556	7.08938e-05	74.456	NaN	NaN	NaN	NaN	NaN	NaN	NaN
P00505	158	P00505	P00505	Aspartate aminotransferase, mitochondrial	GOT2	SFLQRFFKFSRDVFLPKPTWGNHTPIFRDAG	706	P	3	1336		0.995799	0.0018254	97.129	88.31	87.429	0.30641	400600000	158	23.748	0.995799	0.922431	NaN	88.385	97.129	NaN	0.98772	19.0544	0.00557666	88.385	0.995799	23.748	0.00597991	87.429	NaN	NaN	NaN	NaN	0.622832	2.16851	0.0310845	67.646	0	0	NaN	NaN	NaN	NaN	NaN
P00505	160	P00505	P00505	Aspartate aminotransferase, mitochondrial	GOT2	LQRFFKFSRDVFLPKPTWGNHTPIFRDAGMQ	707	P	3	1336		0.999986	0.0018254	97.129	88.31	87.429	0.30641	509750000	160	48.5396	0.999986	0.999885	0.993769	88.385	97.129	75.463	0.999979	46.6901	0.00557666	88.385	0.999986	48.5396	0.00597991	87.429	NaN	NaN	NaN	NaN	0.998591	26.4439	0.0310845	67.646	0	0	NaN	NaN	NaN	NaN	NaN
P00505	167	P00505	P00505	Aspartate aminotransferase, mitochondrial	GOT2	SRDVFLPKPTWGNHTPIFRDAGMQLQGYRYY	708	P	4	1336		0.997444	0.00171738	68.919	56.995	59.628	1.2983	130200000	167	26.0143	0	0.983174	0.997444	NaN	68.919	59.628	NaN	NaN	NaN	NaN	NaN	NaN	NaN	NaN	NaN	NaN	NaN	NaN	NaN	NaN	NaN	NaN	0	0	NaN	NaN	NaN	NaN	NaN
P00558	67	P00558	P00558	Phosphoglycerate kinase 1	PGK1	DNGAKSVVLMSHLGRPDGVPMPDKYSLEPVA	709	P	4	1339		0.999968	5.53481e-06	119.97	119.97	94.946	-0.19617	30644000000	67	44.4546	0.999968	0.999879	0.991925	119.97	107.2	88.014	0.957882	14.2721	9.24358e-06	76.162	0.999968	44.4546	1.37859e-05	119.97	0.965822	14.2761	7.03654e-05	85.184	0.995938	23.2401	0.00013176	107.76	0.774908	5.65037	0.0097679	51.566	0	0	NaN
P00558	71	P00558	P00558	Phosphoglycerate kinase 1	PGK1	KSVVLMSHLGRPDGVPMPDKYSLEPVAVELK	710	P	5	1339		0.993327	1.15738e-38	174.72	174.72	158.12	-0.2223	36055000000	71	25.3625	0.993327	0.98948	0.941495	174.72	173.98	114.03	0.954545	15.6809	2.14394e-14	146.78	0.913045	11.1653	2.36905e-09	133.95	0.993327	25.3625	1.15738e-38	174.72	0.860571	7.88399	0.000547467	107.76	0.899167	9.69882	3.49346e-05	100.67	0	0	NaN
P00558	73	P00558	P00558	Phosphoglycerate kinase 1	PGK1	VVLMSHLGRPDGVPMPDKYSLEPVAVELKSL	711	P	4	1339		0.910559	4.52704e-39	181.95	167.36	181.95	-0.28267	8642300000	73	10.0798	0.575831	0.788321	0.910559	67.69	132.76	181.95	0	0	NaN	NaN	0	0	NaN	NaN	0.468324	1.93135	0.0175024	40.129	0.575831	0.810701	0.000158202	67.69	NaN	NaN	NaN	NaN	0	0	NaN
P00558	308	P00558	P00558	Phosphoglycerate kinase 1	PGK1	DENAKTGQATVASGIPAGWMGLDCGPESSKK	712	P	3	1339	+	1	5.76396e-11	140.81	128.89	42.708	-2.3043	342340000	308	42.7077	1	0.999941	1	99.021	140.81	44.625	1	91.3551	6.06499e-08	91.355	1	42.7077	0.00342898	99.021	NaN	NaN	NaN	NaN	NaN	NaN	NaN	NaN	0.995199	23.166	0.0166828	40.104	NaN	NaN	NaN
P00558	318	P00558	P00558	Phosphoglycerate kinase 1	PGK1	VASGIPAGWMGLDCGPESSKKYAEAVTRAKQ	713	P	3	1339	+	1	6.06499e-08	91.355	86.551	42.708	-2.3043	266080000	318	42.7077	1	NaN	1	91.355	NaN	44.625	1	91.3551	6.06499e-08	91.355	1	42.7077	0.00342898	42.708	NaN	NaN	NaN	NaN	NaN	NaN	NaN	NaN	NaN	NaN	NaN	NaN	NaN	NaN	NaN
P00558	28	P00558	P00558	Phosphoglycerate kinase 1	PGK1	DVKGKRVVMRVDFNVPMKNNQITNNQRIKAA	714	P	4	1339		1	7.49348e-11	176.25	159.72	72.443	0.51401	1601600000	28	72.4432	1	NaN	1	98.942	NaN	176.25	1	72.4432	0.000680603	98.942	NaN	NaN	NaN	NaN	1	93.1813	0.00299478	93.181	1	74.9927	0.0100203	74.993	NaN	NaN	NaN	NaN	NaN	NaN	NaN
P00568	122	P00568	P00568	Adenylate kinase isoenzyme 1	AK1	RRIGQPTLLLYVDAGPETMTQRLLKRGETSG	715	P	2	1340		1	5.43331e-05	117.08	94.503	113.4	0.085807	1049100000	122	105.42	1	1	1	117.08	112.5	105.14	1	105.42	5.51943e-05	113.4	NaN	NaN	NaN	NaN	1	104.31	0.000310977	108.71	1	101.283	5.87401e-05	117.08	NaN	NaN	NaN	NaN	NaN	NaN	NaN
P00568	68	P00568	P00568	Adenylate kinase isoenzyme 1	AK1	RGKKLSEIMEKGQLVPLETVLDMLRDAMVAK	716	P	3	1340		1	0.0211354	54.744	48.713	54.744	0.14554	18644000	68	54.7436	NaN	NaN	1	NaN	NaN	54.744	NaN	NaN	NaN	NaN	NaN	NaN	NaN	NaN	NaN	NaN	NaN	NaN	NaN	NaN	NaN	NaN	NaN	NaN	NaN	NaN	NaN	NaN	NaN
P00918	13	P00918	P00918	Carbonic anhydrase 2	CA2	___MSHHWGYGKHNGPEHWHKDFPIAKGERQ	717	P	4	1345		0.999999	0.000192506	98.676	92.854	92.063	-1.7993	430040000	13	61.52	0.999999	0.999843	0.999999	98.676	85.006	92.063	NaN	NaN	NaN	NaN	0.999932	41.6892	0.0113445	79.346	0.999999	58.3987	0.000192506	98.676	NaN	NaN	NaN	NaN	NaN	NaN	NaN	NaN	NaN	NaN	NaN
P00918	236	P00918	P00918	Carbonic anhydrase 2	CA2	QVLKFRKLNFNGEGEPEELMVDNWRPAQPLK	718	P	2	1345		1	2.94352e-30	175.45	158.17	99.927	0.58078	935730000	236	99.927	0.999995	1	1	126.48	175.45	166.09	NaN	NaN	NaN	NaN	0.999995	54.2752	7.05178e-07	126.48	NaN	NaN	NaN	NaN	NaN	NaN	NaN	NaN	0	0	NaN	NaN	NaN	NaN	NaN
P00918	246	P00918	P00918	Carbonic anhydrase 2	CA2	NGEGEPEELMVDNWRPAQPLKNRQIKASFK_	719	P	2	1345		1	3.57221e-14	141.69	126.63	99.927	0.58078	12541000000	246	99.927	1	1	1	130.49	141.69	112.85	0.999997	54.704	1.06542e-05	92.336	0.999992	50.9063	5.51081e-10	116.74	1	69.4497	8.6587e-07	120.85	0.999994	52.1575	1.85243e-07	121.25	0.999993	51.345	9.86718e-10	130.49	0.988257	19.1277	0.00941069
P00918	249	P00918	P00918	Carbonic anhydrase 2	CA2	GEPEELMVDNWRPAQPLKNRQIKASFK____	720	P	2	1345		1	3.57221e-14	141.69	126.63	99.927	0.58078	12433000000	249	99.927	0.999994	1	1	130.49	141.69	112.85	0.999991	50.453	1.06542e-05	92.336	0.999973	45.7458	5.51081e-10	116.74	0.999991	50.4571	8.6587e-07	120.85	0.999972	45.4721	1.85243e-07	121.25	0.999994	52.1338	9.86718e-10	130.49	0.97236	15.4102	0.00941069
P01034	39	P01034	P01034	Cystatin-C	CST3	AAGSSPGKPPRLVGGPMDASVEEEGVRRALD	721	P	2	1348		1	0.00808362	107.18	74.958	104.87	-0.80844	24618000	39	104.866	NaN	1	NaN	NaN	107.18	NaN	NaN	NaN	NaN	NaN	NaN	NaN	NaN	NaN	NaN	NaN	NaN	NaN	NaN	NaN	NaN	NaN	NaN	NaN	NaN	NaN	NaN	NaN	NaN
P02458	1181	P02458	P02458	Collagen alpha-1(II) chain;Collagen alpha-1(II) chain;Chondrocalcin	COL2A1	PGPVGPSGKDGANGIPGPIGPPGPRGRSGET	722	P	2	1358	+	0.99041	0.00831263	78.548	56.019	77.541	0.28381	42204000	1181	20.1392	0.99041	0.990345	NaN	77.541	78.548	NaN	NaN	NaN	NaN	NaN	0.99041	20.1392	0.00858164	77.541	NaN	NaN	NaN	NaN	NaN	NaN	NaN	NaN	NaN	NaN	NaN	NaN	NaN	NaN	NaN
P02458	1186	P02458	P02458	Collagen alpha-1(II) chain;Collagen alpha-1(II) chain;Chondrocalcin	COL2A1	PSGKDGANGIPGPIGPPGPRGRSGETGPAGP	723	P	2	1358	+	0.666054	0.00831263	78.548	56.019	77.541	0.28381	42204000	1186	0	0.666054	0.655669	NaN	77.541	78.548	NaN	NaN	NaN	NaN	NaN	0.666054	0	0.00858164	77.541	NaN	NaN	NaN	NaN	NaN	NaN	NaN	NaN	NaN	NaN	NaN	NaN	NaN	NaN	NaN
P02458	1187	P02458	P02458	Collagen alpha-1(II) chain;Collagen alpha-1(II) chain;Chondrocalcin	COL2A1	SGKDGANGIPGPIGPPGPRGRSGETGPAGPP	724	P	2	1358	+	0.666054	0.00831263	78.548	56.019	77.541	0.28381	42204000	1187	0	0.666054	0.655669	NaN	77.541	78.548	NaN	NaN	NaN	NaN	NaN	0.666054	0	0.00858164	77.541	NaN	NaN	NaN	NaN	NaN	NaN	NaN	NaN	NaN	NaN	NaN	NaN	NaN	NaN	NaN
P02458	1189	P02458	P02458	Collagen alpha-1(II) chain;Collagen alpha-1(II) chain;Chondrocalcin	COL2A1	KDGANGIPGPIGPPGPRGRSGETGPAGPPGN	725	P	2	1358	+	0.666054	0.00831263	78.548	56.019	77.541	0.28381	42204000	1189	0	0.666054	0.655669	NaN	77.541	78.548	NaN	NaN	NaN	NaN	NaN	0.666054	0	0.00858164	77.541	NaN	NaN	NaN	NaN	NaN	NaN	NaN	NaN	NaN	NaN	NaN	NaN	NaN	NaN	NaN
P02458	1233	P02458	P02458	Collagen alpha-1(II) chain;Collagen alpha-1(II) chain;Chondrocalcin	COL2A1	IDMSAFAGLGPREKGPDPLQYMRADQAAGGL	726	P	3	1358		0.998523	0.0164201	93.561	77.424	84.658	0.22011	63342000	1233	28.2992	0.998523	0.997993	NaN	84.658	93.561	NaN	0.998523	28.2992	0.0307079	84.658	NaN	NaN	NaN	NaN	NaN	NaN	NaN	NaN	NaN	NaN	NaN	NaN	NaN	NaN	NaN	NaN	NaN	NaN	NaN
P02458	893	P02458	P02458	Collagen alpha-1(II) chain;Collagen alpha-1(II) chain;Chondrocalcin	COL2A1	TGVTGPKGARGAQGPPGATGFPGAAGRVGPP	727	P	2	1358	+	0.99894	0.000382174	131.13	103.7	131.13	0.010188	37758000	893	29.7409	0.99894	0.914785	NaN	131.13	103.4	NaN	NaN	NaN	NaN	NaN	0.99894	29.7409	0.00157695	131.13	NaN	NaN	NaN	NaN	NaN	NaN	NaN	NaN	NaN	NaN	NaN	NaN	NaN	NaN	NaN
P02458	899	P02458	P02458	Collagen alpha-1(II) chain;Collagen alpha-1(II) chain;Chondrocalcin	COL2A1	KGARGAQGPPGATGFPGAAGRVGPPGSNGNP	728	P	2	1358	+	1	0.000382174	135.02	122.85	131.13	0.010188	167380000	899	99.312	1	1	NaN	131.13	135.02	NaN	0.999998	59.9494	0.0830847	81.615	1	99.312	0.00157695	131.13	NaN	NaN	NaN	NaN	NaN	NaN	NaN	NaN	NaN	NaN	NaN	NaN	NaN	NaN	NaN
P02458	497	P02458	P02458	Collagen alpha-1(II) chain;Collagen alpha-1(II) chain;Chondrocalcin	COL2A1	PGPAGEEGKRGARGEPGGVGPIGPPGERGAP	729	P	2	1358	+	1	0.00123548	112.02	70.74	112.02	0.11522	234270000	497	67.3135	1	1	0.999999	112.02	101.6	105.65	0.99999	49.9805	0.0201639	77.644	1	66.5361	0.00503194	111.79	1	67.3135	0.0051935	112.02	NaN	NaN	NaN	NaN	NaN	NaN	NaN	NaN	NaN	NaN	NaN
P02458	505	P02458	P02458	Collagen alpha-1(II) chain;Collagen alpha-1(II) chain;Chondrocalcin	COL2A1	KRGARGEPGGVGPIGPPGERGAPGNRGFPGQ	730	P	2	1358	+	0.60965	0.00988526	101.6	70.164	101.6	-1.0265	57516000	505	2.06428	NaN	0.60965	NaN	NaN	101.6	NaN	NaN	NaN	NaN	NaN	NaN	NaN	NaN	NaN	NaN	NaN	NaN	NaN	NaN	NaN	NaN	NaN	NaN	NaN	NaN	NaN	NaN	NaN	NaN
P02458	506	P02458	P02458	Collagen alpha-1(II) chain;Collagen alpha-1(II) chain;Chondrocalcin	COL2A1	RGARGEPGGVGPIGPPGERGAPGNRGFPGQD	731	P	2	1358	+	0.849713	0.00123548	112.02	70.74	111.79	-0.5051	147780000	506	7.54887	0.849713	0.819746	0.847938	112.02	94.688	105.65	0.790042	5.83798	0.0201639	77.644	0.849713	7.54887	0.00503194	111.79	0.769418	5.23806	0.0051935	112.02	NaN	NaN	NaN	NaN	NaN	NaN	NaN	NaN	NaN	NaN	NaN
P02458	1142	P02458	P02458	Collagen alpha-1(II) chain;Collagen alpha-1(II) chain;Chondrocalcin	COL2A1	RGLKGHRGFTGLQGLPGPPGPSGDQGASGPA	732	P	3	1358	+	0.975016	0.00262238	58.49	45.371	50.534	1.8334	60442000	1142	11.6108	0.975016	0.918266	NaN	58.49	54.466	NaN	0.975016	11.6108	0.00262238	58.49	NaN	NaN	NaN	NaN	NaN	NaN	NaN	NaN	NaN	NaN	NaN	NaN	NaN	NaN	NaN	NaN	NaN	NaN	NaN
P02458	1144	P02458	P02458	Collagen alpha-1(II) chain;Collagen alpha-1(II) chain;Chondrocalcin	COL2A1	LKGHRGFTGLQGLPGPPGPSGDQGASGPAGP	733	P	2	1358		0.681559	0.00262238	58.49	45.371	58.49	3.7213	54376000	1144	0	0.681559	NaN	NaN	58.49	NaN	NaN	0.681559	0	0.00262238	58.49	NaN	NaN	NaN	NaN	NaN	NaN	NaN	NaN	NaN	NaN	NaN	NaN	NaN	NaN	NaN	NaN	NaN	NaN	NaN
P02458	1145	P02458	P02458	Collagen alpha-1(II) chain;Collagen alpha-1(II) chain;Chondrocalcin	COL2A1	KGHRGFTGLQGLPGPPGPSGDQGASGPAGPS	734	P	2	1358		0.681559	0.00262238	58.49	45.371	58.49	3.7213	54376000	1145	0	0.681559	0.442397	NaN	58.49	54.466	NaN	0.681559	0	0.00262238	58.49	NaN	NaN	NaN	NaN	NaN	NaN	NaN	NaN	NaN	NaN	NaN	NaN	NaN	NaN	NaN	NaN	NaN	NaN	NaN
P02458	1147	P02458	P02458	Collagen alpha-1(II) chain;Collagen alpha-1(II) chain;Chondrocalcin	COL2A1	HRGFTGLQGLPGPPGPSGDQGASGPAGPSGP	735	P	2	1358		0.681559	0.00262238	58.49	45.371	58.49	3.7213	54376000	1147	0	0.681559	0.442397	NaN	58.49	54.466	NaN	0.681559	0	0.00262238	58.49	NaN	NaN	NaN	NaN	NaN	NaN	NaN	NaN	NaN	NaN	NaN	NaN	NaN	NaN	NaN	NaN	NaN	NaN	NaN
P02458	1114	P02458	P02458	Collagen alpha-1(II) chain;Collagen alpha-1(II) chain;Chondrocalcin	COL2A1	PSGPAGARGIQGPQGPRGDKGEAGEPGERGL	736	P	3	1358		0.960097	0.00263892	77.391	67.83	77.391	-1.6136	32004000	1114	13.813	NaN	0.960097	NaN	NaN	77.391	NaN	NaN	NaN	NaN	NaN	NaN	NaN	NaN	NaN	NaN	NaN	NaN	NaN	NaN	NaN	NaN	NaN	NaN	NaN	NaN	NaN	NaN	NaN	NaN
P02458	1124	P02458	P02458	Collagen alpha-1(II) chain;Collagen alpha-1(II) chain;Chondrocalcin	COL2A1	QGPQGPRGDKGEAGEPGERGLKGHRGFTGLQ	737	P	3	1358		0.999976	0.00263892	77.391	67.83	77.391	-1.6136	19552000	1124	46.0333	NaN	0.999976	NaN	NaN	77.391	NaN	NaN	NaN	NaN	NaN	NaN	NaN	NaN	NaN	NaN	NaN	NaN	NaN	NaN	NaN	NaN	NaN	NaN	NaN	NaN	NaN	NaN	NaN	NaN
P02458	986	P02458	P02458	Collagen alpha-1(II) chain;Collagen alpha-1(II) chain;Chondrocalcin	COL2A1	PGPQGLAGQRGIVGLPGQRGERGFPGLPGPS	738	P	2	1358		1	0.0319368	142.43	108.17	142.43	0.07895	26300000	986	142.427	NaN	1	NaN	NaN	142.43	NaN	NaN	NaN	NaN	NaN	NaN	NaN	NaN	NaN	NaN	NaN	NaN	NaN	NaN	NaN	NaN	NaN	NaN	NaN	NaN	NaN	NaN	NaN	NaN
P02458	211	P02458	P02458	Collagen alpha-1(II) chain;Collagen alpha-1(II) chain;Chondrocalcin	COL2A1	LGVMQGPMGPMGPRGPPGPAGAPGPQGFQGN	739	P	3	1358	+	0.474882	0.00092636	40.067	37.872	40.067	0.65151	0	211	0	0.474882	NaN	NaN	40.067	NaN	NaN	NaN	NaN	NaN	NaN	NaN	NaN	NaN	NaN	0.474882	0	0.00092636	40.067	NaN	NaN	NaN	NaN	NaN	NaN	NaN	NaN	NaN	NaN	NaN
P02458	212	P02458	P02458	Collagen alpha-1(II) chain;Collagen alpha-1(II) chain;Chondrocalcin	COL2A1	GVMQGPMGPMGPRGPPGPAGAPGPQGFQGNP	740	P	3	1358	+	0.41284	0.00092636	40.067	37.872	40.067	0.65151	0	212	0	0.41284	NaN	NaN	40.067	NaN	NaN	NaN	NaN	NaN	NaN	NaN	NaN	NaN	NaN	0.41284	0	0.00092636	40.067	NaN	NaN	NaN	NaN	NaN	NaN	NaN	NaN	NaN	NaN	NaN
P02458	218	P02458	P02458	Collagen alpha-1(II) chain;Collagen alpha-1(II) chain;Chondrocalcin	COL2A1	MGPMGPRGPPGPAGAPGPQGFQGNPGEPGEP	741	P	3	1358	+	0.838918	0.00092636	40.067	37.872	40.067	0.65151	17914000	218	9.43539	0.838918	NaN	NaN	40.067	NaN	NaN	NaN	NaN	NaN	NaN	NaN	NaN	NaN	NaN	0.838918	9.43539	0.00092636	40.067	NaN	NaN	NaN	NaN	NaN	NaN	NaN	NaN	NaN	NaN	NaN
P02458	227	P02458	P02458	Collagen alpha-1(II) chain;Collagen alpha-1(II) chain;Chondrocalcin	COL2A1	PGPAGAPGPQGFQGNPGEPGEPGVSGPMGPR	742	P	3	1358	+	0.498826	0.00092636	40.067	37.872	40.067	0.65151	0	227	0.765124	0.498826	NaN	NaN	40.067	NaN	NaN	NaN	NaN	NaN	NaN	NaN	NaN	NaN	NaN	0.498826	0.765124	0.00092636	40.067	NaN	NaN	NaN	NaN	NaN	NaN	NaN	NaN	NaN	NaN	NaN
P02458	233	P02458	P02458	Collagen alpha-1(II) chain;Collagen alpha-1(II) chain;Chondrocalcin	COL2A1	PGPQGFQGNPGEPGEPGVSGPMGPRGPPGPP	743	P	3	1358	+	0.658125	0.00092636	40.067	37.872	40.067	0.65151	17914000	233	4.49434	0.658125	NaN	NaN	40.067	NaN	NaN	NaN	NaN	NaN	NaN	NaN	NaN	NaN	NaN	0.658125	4.49434	0.00092636	40.067	NaN	NaN	NaN	NaN	NaN	NaN	NaN	NaN	NaN	NaN	NaN
P02458	245	P02458	P02458	Collagen alpha-1(II) chain;Collagen alpha-1(II) chain;Chondrocalcin	COL2A1	PGEPGVSGPMGPRGPPGPPGKPGDDGEAGKP	744	P	2	1358	+	0.996828	1.86744e-05	125.53	95.591	125.53	0.86838	32400000	245	27.8373	0.996828	0.995927	NaN	125.53	90.654	NaN	NaN	NaN	NaN	NaN	0.996828	27.8373	1.86744e-05	125.53	NaN	NaN	NaN	NaN	NaN	NaN	NaN	NaN	NaN	NaN	NaN	NaN	NaN	NaN	NaN
P02458	247	P02458	P02458	Collagen alpha-1(II) chain;Collagen alpha-1(II) chain;Chondrocalcin	COL2A1	EPGVSGPMGPRGPPGPPGKPGDDGEAGKPGK	745	P	3	1358	+	0.520136	0.00268273	66.12	32.715	66.12	-0.4017	0	247	1.28953	NaN	0.520136	NaN	NaN	66.12	NaN	NaN	NaN	NaN	NaN	NaN	NaN	NaN	NaN	NaN	NaN	NaN	NaN	NaN	NaN	NaN	NaN	NaN	NaN	NaN	NaN	NaN	NaN	NaN
P02458	248	P02458	P02458	Collagen alpha-1(II) chain;Collagen alpha-1(II) chain;Chondrocalcin	COL2A1	PGVSGPMGPRGPPGPPGKPGDDGEAGKPGKA	746	P	4	1358	+	0.963012	1.86744e-05	125.53	95.591	79.489	0.22596	12188000	248	14.0662	0.963012	0.493985	NaN	125.53	90.654	NaN	NaN	NaN	NaN	NaN	0.963012	14.0662	1.86744e-05	125.53	NaN	NaN	NaN	NaN	NaN	NaN	NaN	NaN	NaN	NaN	NaN	NaN	NaN	NaN	NaN
P02458	251	P02458	P02458	Collagen alpha-1(II) chain;Collagen alpha-1(II) chain;Chondrocalcin	COL2A1	SGPMGPRGPPGPPGKPGDDGEAGKPGKAGER	747	P	2	1358	+	0.999975	1.86744e-05	125.53	95.591	125.53	0.86838	12188000	251	45.652	0.999975	0.493563	NaN	125.53	90.654	NaN	NaN	NaN	NaN	NaN	0.999975	45.652	1.86744e-05	125.53	NaN	NaN	NaN	NaN	NaN	NaN	NaN	NaN	NaN	NaN	NaN	NaN	NaN	NaN	NaN
P02458	260	P02458	P02458	Collagen alpha-1(II) chain;Collagen alpha-1(II) chain;Chondrocalcin	COL2A1	PGPPGKPGDDGEAGKPGKAGERGPPGPQGAR	748	P	2	1358	+	1	1.86744e-05	125.53	95.591	125.53	0.86838	12188000	260	94.001	1	NaN	NaN	125.53	NaN	NaN	NaN	NaN	NaN	NaN	1	94.001	1.86744e-05	125.53	NaN	NaN	NaN	NaN	NaN	NaN	NaN	NaN	NaN	NaN	NaN	NaN	NaN	NaN	NaN
P02458	710	P02458	P02458	Collagen alpha-1(II) chain;Collagen alpha-1(II) chain;Chondrocalcin	COL2A1	VGPRGERGFPGERGSPGAQGLQGPRGLPGTP	749	P	2	1358	+	1	1.36443e-14	179.36	139.44	179.36	-0.25841	31002000	710	136.076	NaN	1	NaN	NaN	179.36	NaN	NaN	NaN	NaN	NaN	NaN	NaN	NaN	NaN	NaN	NaN	NaN	NaN	NaN	NaN	NaN	NaN	NaN	NaN	NaN	NaN	NaN	NaN	NaN
P02458	907	P02458	P02458	Collagen alpha-1(II) chain;Collagen alpha-1(II) chain;Chondrocalcin	COL2A1	PPGATGFPGAAGRVGPPGSNGNPGPPGPPGP	750	P	2	1358		0.516253	0.00372874	72.175	50.618	72.175	1.3502	2066800	907	0	NaN	0.498007	0.516253	NaN	68.972	72.175	NaN	NaN	NaN	NaN	NaN	NaN	NaN	NaN	NaN	NaN	NaN	NaN	NaN	NaN	NaN	NaN	NaN	NaN	NaN	NaN	NaN	NaN	NaN
P02458	908	P02458	P02458	Collagen alpha-1(II) chain;Collagen alpha-1(II) chain;Chondrocalcin	COL2A1	PGATGFPGAAGRVGPPGSNGNPGPPGPPGPS	751	P	2	1358		0.84735	0.00372874	72.175	50.618	62.378	0.34378	4354900	908	8.38345	NaN	0.84735	0.516253	NaN	68.972	72.175	NaN	NaN	NaN	NaN	NaN	NaN	NaN	NaN	NaN	NaN	NaN	NaN	NaN	NaN	NaN	NaN	NaN	NaN	NaN	NaN	NaN	NaN	NaN
P02458	914	P02458	P02458	Collagen alpha-1(II) chain;Collagen alpha-1(II) chain;Chondrocalcin	COL2A1	PGAAGRVGPPGSNGNPGPPGPPGPSGKDGPK	752	P	2	1358		0.944704	0.00372874	72.175	50.618	72.175	1.3502	4354900	914	13.4225	NaN	0.864297	0.944704	NaN	62.378	72.175	NaN	NaN	NaN	NaN	NaN	NaN	NaN	NaN	NaN	NaN	NaN	NaN	NaN	NaN	NaN	NaN	NaN	NaN	NaN	NaN	NaN	NaN	NaN
P02458	917	P02458	P02458	Collagen alpha-1(II) chain;Collagen alpha-1(II) chain;Chondrocalcin	COL2A1	AGRVGPPGSNGNPGPPGPPGPSGKDGPKGAR	753	P	2	1358		0.7858	0.00372874	72.175	50.618	62.378	0.34378	8346500	917	8.38345	NaN	0.7858	0.631165	NaN	68.972	72.175	NaN	NaN	NaN	NaN	NaN	NaN	NaN	NaN	NaN	NaN	NaN	NaN	NaN	NaN	NaN	NaN	NaN	NaN	NaN	NaN	NaN	NaN	NaN
P02458	920	P02458	P02458	Collagen alpha-1(II) chain;Collagen alpha-1(II) chain;Chondrocalcin	COL2A1	VGPPGSNGNPGPPGPPGPSGKDGPKGARGDS	754	P	2	1358		0.771932	0.00372874	72.175	50.618	62.378	0.34378	4354900	920	8.38345	NaN	0.771932	0.628567	NaN	62.378	72.175	NaN	NaN	NaN	NaN	NaN	NaN	NaN	NaN	NaN	NaN	NaN	NaN	NaN	NaN	NaN	NaN	NaN	NaN	NaN	NaN	NaN	NaN	NaN
P02458	581	P02458	P02458	Collagen alpha-1(II) chain;Collagen alpha-1(II) chain;Chondrocalcin	COL2A1	PGDAGPQGKVGPSGAPGEDGRPGPPGPQGAR	755	P	3	1358	+	0.99961	0.00662205	80.98	63.683	79.635	-0.98101	52586000	581	33.7554	0.99961	NaN	NaN	80.98	NaN	NaN	0.998304	27.1526	0.0136291	61.767	0.999415	33.4808	0.00662205	80.98	0.99961	33.7554	0.00832221	79.635	0.89246	7.42627	0.00677056	47.808	NaN	NaN	NaN	NaN	NaN	NaN	NaN
P02458	587	P02458	P02458	Collagen alpha-1(II) chain;Collagen alpha-1(II) chain;Chondrocalcin	COL2A1	QGKVGPSGAPGEDGRPGPPGPQGARGQPGVM	756	P	3	1358		0.527945	1.70198e-06	87.156	67.602	47.808	-0.35713	33117000	587	0	0.527945	0.496295	0.24995	79.635	87.156	72.644	0.50032	0	0.0136291	61.767	NaN	NaN	NaN	NaN	0.50007	0	0.00832221	79.635	0.527945	0	0.00677056	47.808	NaN	NaN	NaN	NaN	NaN	NaN	NaN
P02458	589	P02458	P02458	Collagen alpha-1(II) chain;Collagen alpha-1(II) chain;Chondrocalcin	COL2A1	KVGPSGAPGEDGRPGPPGPQGARGQPGVMGF	757	P	3	1358		0.525751	0.000932409	80.156	55.747	47.808	-0.35713	33117000	589	0	0.525751	0.496295	0.24995	79.635	80.156	72.644	0.50032	0	0.0136291	61.767	NaN	NaN	NaN	NaN	0.50007	0	0.00832221	79.635	0.525751	0	0.00677056	47.808	NaN	NaN	NaN	NaN	NaN	NaN	NaN
P02458	590	P02458	P02458	Collagen alpha-1(II) chain;Collagen alpha-1(II) chain;Chondrocalcin	COL2A1	VGPSGAPGEDGRPGPPGPQGARGQPGVMGFP	758	P	3	1358		0.525751	0.000932409	80.98	63.683	47.808	-0.35713	52586000	590	0	0.525751	0.496295	0.24995	80.98	80.156	72.644	0.50032	0	0.0136291	61.767	0.504449	0.676661	0.00662205	80.98	0.50007	0	0.00832221	79.635	0.525751	0	0.00677056	47.808	NaN	NaN	NaN	NaN	NaN	NaN	NaN
P02458	592	P02458	P02458	Collagen alpha-1(II) chain;Collagen alpha-1(II) chain;Chondrocalcin	COL2A1	PSGAPGEDGRPGPPGPQGARGQPGVMGFPGP	759	P	3	1358	+	0.552526	0.000932409	80.98	63.683	80.98	0.077392	52586000	592	1.34473	0.552526	0.496295	0.24995	80.98	80.156	72.644	0.50032	0	0.0136291	61.767	0.552526	1.34473	0.00662205	80.98	0.50007	0	0.00832221	79.635	0.525751	0	0.00677056	47.808	NaN	NaN	NaN	NaN	NaN	NaN	NaN
P02462	1422	P02462	P02462	Collagen alpha-1(IV) chain;Arresten	COL4A1	KGEMGPAGPTGPRGFPGPPGPDGLPGSMGPP	760	P	3	1359	+	0.987683	9.18628e-05	51.236	45.008	51.236	0.051114	14860000	1422	18.6822	NaN	0.987683	NaN	NaN	51.236	NaN	NaN	NaN	NaN	NaN	NaN	NaN	NaN	NaN	NaN	NaN	NaN	NaN	NaN	NaN	NaN	NaN	NaN	NaN	NaN	NaN	NaN	NaN	NaN
P02462	1424	P02462	P02462	Collagen alpha-1(IV) chain;Arresten	COL4A1	EMGPAGPTGPRGFPGPPGPDGLPGSMGPPGT	761	P	3	1359	+	0.846328	9.18628e-05	51.236	45.008	51.236	0.051114	14860000	1424	6.31953	NaN	0.846328	NaN	NaN	51.236	NaN	NaN	NaN	NaN	NaN	NaN	NaN	NaN	NaN	NaN	NaN	NaN	NaN	NaN	NaN	NaN	NaN	NaN	NaN	NaN	NaN	NaN	NaN	NaN
P02462	1425	P02462	P02462	Collagen alpha-1(IV) chain;Arresten	COL4A1	MGPAGPTGPRGFPGPPGPDGLPGSMGPPGTP	762	P	3	1359	+	0.497026	9.18628e-05	51.236	45.008	51.236	0.051114	0	1425	0	NaN	0.497026	NaN	NaN	51.236	NaN	NaN	NaN	NaN	NaN	NaN	NaN	NaN	NaN	NaN	NaN	NaN	NaN	NaN	NaN	NaN	NaN	NaN	NaN	NaN	NaN	NaN	NaN	NaN
P02462	1427	P02462	P02462	Collagen alpha-1(IV) chain;Arresten	COL4A1	PAGPTGPRGFPGPPGPDGLPGSMGPPGTPSV	763	P	3	1359	+	0.497026	9.18628e-05	51.236	45.008	51.236	0.051114	0	1427	0	NaN	0.497026	NaN	NaN	51.236	NaN	NaN	NaN	NaN	NaN	NaN	NaN	NaN	NaN	NaN	NaN	NaN	NaN	NaN	NaN	NaN	NaN	NaN	NaN	NaN	NaN	NaN	NaN	NaN
P02462	1431	P02462	P02462	Collagen alpha-1(IV) chain;Arresten	COL4A1	TGPRGFPGPPGPDGLPGSMGPPGTPSVDHGF	764	P	3	1359		0.852312	0.00505764	43.921	37.694	43.921	-1.6793	53203000	1431	10.5636	NaN	0.852312	NaN	NaN	43.921	NaN	NaN	NaN	NaN	NaN	NaN	NaN	NaN	NaN	NaN	NaN	NaN	NaN	NaN	NaN	NaN	NaN	NaN	NaN	NaN	NaN	NaN	NaN	NaN
P02462	1437	P02462	P02462	Collagen alpha-1(IV) chain;Arresten	COL4A1	PGPPGPDGLPGSMGPPGTPSVDHGFLVTRHS	765	P	3	1359	+	0.740215	9.18628e-05	51.236	45.008	51.236	0.051114	14860000	1437	6.31953	NaN	0.740215	NaN	NaN	51.236	NaN	NaN	NaN	NaN	NaN	NaN	NaN	NaN	NaN	NaN	NaN	NaN	NaN	NaN	NaN	NaN	NaN	NaN	NaN	NaN	NaN	NaN	NaN	NaN
P02462	588	P02462	P02462	Collagen alpha-1(IV) chain;Arresten	COL4A1	KGSPGSVGLKGERGPPGGVGFPGSRGDTGPP	766	P	2	1359	+	0.99991	0.0115222	125.97	91.582	125.97	-1.2248	691560000	588	40.4358	0.99991	0.999875	0.999857	125.97	114.4	125.75	0.999304	31.5706	0.0218379	114.4	0.99991	40.4358	0.0115222	125.97	0	0	NaN	NaN	0	0	NaN	NaN	NaN	NaN	NaN	NaN	NaN	NaN	NaN
P02462	594	P02462	P02462	Collagen alpha-1(IV) chain;Arresten	COL4A1	VGLKGERGPPGGVGFPGSRGDTGPPGPPGYG	767	P	2	1359	+	1	0.0115222	132.01	90.562	125.75	-0.8489	691560000	594	119.087	1	1	1	125.97	132.01	125.75	1	99.9404	0.0218379	114.4	1	117.744	0.0115222	125.97	0	0	NaN	NaN	0	0	NaN	NaN	NaN	NaN	NaN	NaN	NaN	NaN	NaN
P02545	508	P02545	P02545	Prelamin-A/C;Lamin-A/C	LMNA	QVVTIWAAGAGATHSPPTDLVWKAQNTWGCG	768	P	3	1360		1	6.24484e-06	122.04	102.06	54.728	1.5169	151450000	508	54.7281	NaN	1	1	NaN	122.04	55.588	NaN	NaN	NaN	NaN	NaN	NaN	NaN	NaN	NaN	NaN	NaN	NaN	NaN	NaN	NaN	NaN	NaN	NaN	NaN	NaN	NaN	NaN	NaN
P02545	509	P02545	P02545	Prelamin-A/C;Lamin-A/C	LMNA	VVTIWAAGAGATHSPPTDLVWKAQNTWGCGN	769	P	3	1360		1	6.24484e-06	122.04	102.06	54.728	1.5169	151450000	509	54.7281	NaN	1	1	NaN	122.04	55.588	NaN	NaN	NaN	NaN	NaN	NaN	NaN	NaN	NaN	NaN	NaN	NaN	NaN	NaN	NaN	NaN	NaN	NaN	NaN	NaN	NaN	NaN	NaN
P02545	594	P02545	P02545	Prelamin-A/C;Lamin-A/C	LMNA	YNLRSRTVLCGTCGQPADKASASGSGAQVGG	770	P	4	1360		0.930838	0.000197422	42.782	41.338	42.782	2.5141	43706000	594	11.2901	0.781794	NaN	0.930838	42.015	NaN	42.782	NaN	NaN	NaN	NaN	NaN	NaN	NaN	NaN	NaN	NaN	NaN	NaN	0.781794	5.54226	0.000216461	42.015	NaN	NaN	NaN	NaN	NaN	NaN	NaN
P02786	516	P02786	P02786	Transferrin receptor protein 1;Transferrin receptor protein 1, serum form	TFRC	LLYTLIEKTMQNVKHPVTGQFLYQDSNWASK	771	P	3	1367		1	0.00152377	59.814	53.719	50.215	0.70125	285930000	516	50.2148	1	NaN	NaN	59.814	NaN	NaN	NaN	NaN	NaN	NaN	NaN	NaN	NaN	NaN	NaN	NaN	NaN	NaN	1	50.2148	0.00152377	59.814	NaN	NaN	NaN	NaN	NaN	NaN	NaN
P04040	70	P04040	P04040	Catalase	CAT	VVFTDEMAHFDRERIPERVVHAKGAGAFGYF	772	P	4	1377		1	3.36102e-09	125.04	114.8	125.04	0.064982	4391400000	70	124.306	1	1	1	125.04	119.01	117.38	NaN	NaN	NaN	NaN	1	85.4034	1.12269e-05	86.557	1	124.306	3.36102e-09	125.04	NaN	NaN	NaN	NaN	NaN	NaN	NaN	NaN	NaN	NaN	NaN
P04040	336	P04040	P04040	Catalase	CAT	NPVNYFAEVEQIAFDPSNMPPGIEASPDKML	773	P	3	1377		0.82539	3.11213e-06	70.268	66.272	70.268	-0.2453	13176000	336	7.60254	0.82539	0	NaN	70.268	NaN	NaN	NaN	NaN	NaN	NaN	0.82539	7.60254	3.11213e-06	70.268	NaN	NaN	NaN	NaN	NaN	NaN	NaN	NaN	NaN	NaN	NaN	NaN	NaN	NaN	NaN
P04040	340	P04040	P04040	Catalase	CAT	YFAEVEQIAFDPSNMPPGIEASPDKMLQGRL	774	P	4	1377		0.359863	2.52816e-08	81.82	77.667	50.253	1.4298	0	340	0.446746	NaN	0.359863	NaN	NaN	81.82	NaN	NaN	NaN	NaN	NaN	NaN	NaN	NaN	NaN	NaN	NaN	NaN	NaN	NaN	NaN	NaN	NaN	NaN	NaN	NaN	NaN	NaN	NaN	NaN
P04040	341	P04040	P04040	Catalase	CAT	FAEVEQIAFDPSNMPPGIEASPDKMLQGRLF	775	P	4	1377		0.439577	2.02988e-13	127.02	124.08	127.02	0.62515	0	341	1.37548	NaN	0.439577	NaN	NaN	127.02	NaN	NaN	NaN	NaN	NaN	NaN	NaN	NaN	NaN	NaN	NaN	NaN	NaN	NaN	NaN	NaN	NaN	NaN	NaN	NaN	NaN	NaN	NaN	NaN
P04040	179	P04040	P04040	Catalase	CAT	FIHSQKRNPQTHLKDPDMVWDFWSLRPESLH	776	P	4	1377		1	2.62811e-30	162.85	155.59	162.85	-0.86741	156520000	179	71.4452	0.999803	1	0.999998	88.688	162.85	161.55	NaN	NaN	NaN	NaN	NaN	NaN	NaN	NaN	0.999803	38.5674	6.99675e-05	88.688	NaN	NaN	NaN	NaN	NaN	NaN	NaN	NaN	NaN	NaN	NaN
P04062	454	P04062	P04062	Glucosylceramidase	GBA	SPIIVDITKDTFYKQPMFYHLGHFSKFIPEG	777	P	5	1379		1	3.09699e-07	123.25	118.24	123.25	-0.36299	870630000	454	89.6261	NaN	NaN	1	NaN	NaN	123.25	NaN	NaN	NaN	NaN	NaN	NaN	NaN	NaN	NaN	NaN	NaN	NaN	NaN	NaN	NaN	NaN	NaN	NaN	NaN	NaN	NaN	NaN	NaN
P04066	403	P04066	P04066	Tissue alpha-L-fucosidase	FUCA1	YTSKGSAVYAIFLHWPENGVLNLESPITTST	778	P	3	1380		0.999985	6.52903e-05	78.65	73.645	78.65	-3.8639	20918000	403	48.2979	NaN	0.999985	NaN	NaN	78.65	NaN	NaN	NaN	NaN	NaN	NaN	NaN	NaN	NaN	NaN	NaN	NaN	NaN	NaN	NaN	NaN	NaN	NaN	NaN	NaN	NaN	NaN	NaN	NaN
P04075	231	P04075	P04075	Fructose-bisphosphate aldolase A	ALDOA	ALSDHHIYLEGTLLKPNMVTPGHACTQKFSH	779	P	6	1381		1	1.09139e-49	186.13	169.51	40.428	-0.66069	8175200000	231	40.4278	1	0.999836	0.999977	139.75	182.54	186.13	0.987762	19.0693	5.5183e-05	80.02	0.999952	43.2136	2.04102e-12	139.75	0.954746	13.2424	0.000265623	56.533	0.976702	16.2244	0.000105477	100.93	1	40.4278	0.0276625	40.428	NaN	NaN	NaN
P04075	236	P04075	P04075	Fructose-bisphosphate aldolase A	ALDOA	HIYLEGTLLKPNMVTPGHACTQKFSHEEIAM	780	P	6	1381		1	0.00309844	100.57	89.058	40.428	-0.66069	2024000000	236	40.4278	1	0.999999	0.999999	100.57	80.231	78.098	NaN	NaN	NaN	NaN	NaN	NaN	NaN	NaN	NaN	NaN	NaN	NaN	NaN	NaN	NaN	NaN	1	40.4278	0.00309844	100.57	0.999999	62.9801	0.0179364
P04075	2	P04075	P04075	Fructose-bisphosphate aldolase A	ALDOA	______________MPYQYPALTPEQKKELS	781	P	2	1381		0.999993	2.072e-16	153.11	147.26	86.344	0.42008	4101100000	2	51.5713	0.999979	0.999981	0.999993	153.11	137.05	123.43	0.979534	16.8131	0.00119047	59.975	0.999979	46.7878	0.00418463	88.948	0.999802	37.0818	0.0121206	63.046	0.999788	36.877	2.072e-16	153.11	NaN	NaN	NaN	NaN	NaN	NaN	NaN
P04080	6	P04080	P04080	Cystatin-B	CSTB	__________MMCGAPSATQPATAETQHIAD	782	P	3	1382		0.999998	4.02172e-07	108.4	105.52	108.4	0.38505	245070000	6	57.1711	0.999998	0.874784	0.999678	108.4	58.974	73.546	NaN	NaN	NaN	NaN	NaN	NaN	NaN	NaN	NaN	NaN	NaN	NaN	NaN	NaN	NaN	NaN	0.863635	8.01629	0.000749378	52.823	0.999998	57.1711	4.02172e-07
P04083	115	P04083	P04083	Annexin A1	ANXA1	LTGHLEEVVLALLKTPAQFDADELRAAMKGL	783	P	4	1383		1	7.45254e-06	120.74	110.95	120.74	1.1789	84889000	115	120.745	NaN	NaN	1	NaN	NaN	120.74	NaN	NaN	NaN	NaN	NaN	NaN	NaN	NaN	NaN	NaN	NaN	NaN	NaN	NaN	NaN	NaN	NaN	NaN	NaN	NaN	NaN	NaN	NaN
P04181	231	P04181	P04181	Ornithine aminotransferase, mitochondrial;Ornithine aminotransferase, hepatic form;Ornithine aminotransferase, renal form	OAT	ERALQDPNVAAFMVEPIQGEAGVVVPDPGYL	784	P	3	1386		0.928911	7.52359e-07	66.902	60.408	66.902	0.058583	680170000	231	12.2542	0	0.928911	0	NaN	66.902	NaN	0	0	NaN	NaN	NaN	NaN	NaN	NaN	NaN	NaN	NaN	NaN	NaN	NaN	NaN	NaN	NaN	NaN	NaN	NaN	NaN	NaN	NaN
P04181	243	P04181	P04181	Ornithine aminotransferase, mitochondrial;Ornithine aminotransferase, hepatic form;Ornithine aminotransferase, renal form	OAT	MVEPIQGEAGVVVPDPGYLMGVRELCTRHQV	785	P	3	1386		0.968372	3.67374e-07	97.437	97.437	97.437	-0.83451	8579700000	243	15.1016	0.832403	0.964219	0.968372	61.082	89.129	97.437	0.719416	7.44292	7.81379e-05	53.074	0.775106	7.20072	0.00209248	43.416	0.832403	10.1357	3.67374e-07	61.082	NaN	NaN	NaN	NaN	NaN	NaN	NaN	NaN	NaN	NaN	NaN
P04181	138	P04181	P04181	Ornithine aminotransferase, mitochondrial;Ornithine aminotransferase, hepatic form;Ornithine aminotransferase, renal form	OAT	YEEYITKLFNYHKVLPMNTGVEAGETACKLA	786	P	2	1386		1	6.84604e-13	163.78	141.06	86.772	-0.77816	13813000000	138	86.7722	1	1	1	163.78	151.1	151.1	1	163.781	6.84604e-13	163.78	1	154.657	0.00121495	154.66	1	125.542	0.00325023	135.6	NaN	NaN	NaN	NaN	1	84.5058	0.0653501	84.506	NaN	NaN	NaN
P04183	200	P04183	P04183	Thymidine kinase, cytosolic	TK1	CRLCYFKKASGQPAGPDNKENCPVPGKPGEA	787	P	4	1387		0.461697	0.0173937	43.623	37.657	43.623	-0.3095	0	200	1.09867	NaN	0.461697	NaN	NaN	43.623	NaN	NaN	NaN	NaN	NaN	NaN	NaN	NaN	NaN	NaN	NaN	NaN	NaN	NaN	NaN	NaN	NaN	NaN	NaN	NaN	NaN	NaN	NaN	NaN
P04183	27	P04183	P04183	Thymidine kinase, cytosolic	TK1	GSPSKTRGQIQVILGPMFSGKSTELMRRVRR	788	P	3	1387		1	0.0113107	123.67	119.13	70.942	0.053582	859830000	27	70.9421	1	1	1	123.67	65.704	69.737	NaN	NaN	NaN	NaN	NaN	NaN	NaN	NaN	1	58.8852	0.0137751	123.67	1	70.9421	0.0227077	70.942	NaN	NaN	NaN	NaN	NaN	NaN	NaN
P04350;P68371;Q3ZCM7	70;70;70	P04350;P68371;Q3ZCM7	P68371	Tubulin beta-4A chain;Tubulin beta-4B chain;Tubulin beta-8 chain	TUBB4A;TUBB4B;TUBB8	SGGRYVPRAVLVDLEPGTMDSVRSGPFGQVF;TGGKYVPRAVLVDLEPGTMDSVRSGPFGQIF;TGGNYVPRAVLVDLEPGTMDSVRSGPFGQIF	789	P	2	1388;3076;4229		1	0.00893924	112.13	88.036	112.13	-0.70084	8873900000	70	112.125	1	1	NaN	50.806	112.13	NaN	1	50.8061	0.0340289	50.806	NaN	NaN	NaN	NaN	NaN	NaN	NaN	NaN	NaN	NaN	NaN	NaN	NaN	NaN	NaN	NaN	NaN	NaN	NaN
P04350	160	P04350	P04350	Tubulin beta-4A chain	TUBB4A	SGMGTLLISKIREEFPDRIMNTFSVVPSPKV	790	P	3	1388		0.998691	0.0126992	58.49	7.1419	58.49	0.17708	48669000	160	28.8535	NaN	NaN	0.998691	NaN	NaN	58.49	NaN	NaN	NaN	NaN	NaN	NaN	NaN	NaN	NaN	NaN	NaN	NaN	NaN	NaN	NaN	NaN	NaN	NaN	NaN	NaN	NaN	NaN	NaN
P04350;P07437;P68371;Q13885;Q9BVA1	220;220;220;220;220	P04350;P07437;P68371;Q13885;Q9BVA1	P68371	Tubulin beta-4A chain;Tubulin beta chain;Tubulin beta-4B chain;Tubulin beta-2A chain;Tubulin beta-2B chain	TUBB4A;TUBB;TUBB4B;TUBB2A;TUBB2B	EALYDICFRTLKLTTPTYGDLNHLVSATMSG	791	P	3	1388;1461;3076;3678;7544		1	2.75812e-09	77.31	73.236	40.669	-1.21	4081500000	220	40.6688	1	1	1	67.064	55.033	77.31	1	42.8061	3.21678e-06	60.746	1	49.5771	0.00302236	49.577	0.999993	51.5672	2.75812e-09	67.064	0	0	NaN	NaN	NaN	NaN	NaN	NaN	NaN	NaN	NaN
P04350;P07437;P68371;Q13509;Q13885;Q9BUF5;Q9BVA1	346;346;346;346;346;346;346	P04350;P07437;P68371;Q13509;Q13885;Q9BUF5;Q9BVA1	P68371	Tubulin beta-4A chain;Tubulin beta chain;Tubulin beta-4B chain;Tubulin beta-3 chain;Tubulin beta-2A chain;Tubulin beta-6 chain;Tubulin beta-2B chain	TUBB4A;TUBB;TUBB4B;TUBB3;TUBB2A;TUBB6;TUBB2B	LAIQSKNSSYFVEWIPNNVKVAVCDIPPRGL;LNVQNKNSSYFVEWIPNNVKTAVCDIPPRGL;LSVQSKNSSYFVEWIPNNVKTAVCDIPPRGL	792	P	2	1388;1461;3076;3612;3678;7499;7544		1	4.18499e-09	162	149.79	97.452	-3.6252	3992500000	346	97.4517	1	1	1	159.09	148.28	162	1	121.287	0.0154773	121.29	1	63.1599	0.0133336	139.32	1	98.6338	0.00230961	159.09	NaN	NaN	NaN	NaN	1	123.007	0.00735512	129	1	112.938	0.0217026
P04350;P07437;P68371;Q13885;Q9BVA1	87;87;87;87;87	P04350;P07437;P68371;Q13885;Q9BVA1	P68371	Tubulin beta-4A chain;Tubulin beta chain;Tubulin beta-4B chain;Tubulin beta-2A chain;Tubulin beta-2B chain	TUBB4A;TUBB;TUBB4B;TUBB2A;TUBB2B	TMDSVRSGPFGQIFRPDNFVFGQSGAGNNWA	793	P	3	1388;1461;3076;3678;7544		0.999996	0.021456	54.072	45.908	54.072	-3.7852	95209000	87	53.6839	NaN	0.999996	NaN	NaN	54.072	NaN	NaN	NaN	NaN	NaN	NaN	NaN	NaN	NaN	NaN	NaN	NaN	NaN	NaN	NaN	NaN	NaN	NaN	NaN	NaN	NaN	NaN	NaN	NaN
P04406	159	P04406	P04406	Glyceraldehyde-3-phosphate dehydrogenase	GAPDH	LKIISNASCTTNCLAPLAKVIHDNFGIVEGL	794	P	2	1389		1	0.00578563	115.33	90.473	87.667	-0.55271	2963400000	159	87.6673	1	1	1	87.667	115.33	81.92	NaN	NaN	NaN	NaN	NaN	NaN	NaN	NaN	NaN	NaN	NaN	NaN	NaN	NaN	NaN	NaN	1	87.6673	0.0542743	87.667	NaN	NaN	NaN
P04406	236	P04406	P04406	Glyceraldehyde-3-phosphate dehydrogenase	GAPDH	IPELNGKLTGMAFRVPTANVSVVDLTCRLEK	795	P	4	1389		1	0.000235603	98.967	92.152	41.208	-0.76933	1276700000	236	41.208	1	1	1	72.015	98.967	74.364	NaN	NaN	NaN	NaN	1	72.0151	0.0037294	72.015	NaN	NaN	NaN	NaN	0.946616	12.4876	0.000820338	57.299	1	68.8805	0.000840805	68.88	NaN	NaN	NaN
P04406	129	P04406	P04406	Glyceraldehyde-3-phosphate dehydrogenase	GAPDH	GGAKRVIISAPSADAPMFVMGVNHEKYDNSL	796	P	4	1389	+	1	1.15883e-27	171.22	157.81	153.82	-0.22841	187730000000	129	93.9312	0.999997	1	0.999999	132.35	153.82	171.22	0.999961	44.0557	3.96166e-05	109.26	0.999768	36.3816	4.94248e-06	117.82	0.999947	42.7852	2.95606e-09	132.35	0.999997	55.0491	1.38992e-05	107.87	0.999978	46.4852	1.72438e-06	96.54	NaN	NaN	NaN
P04406	36	P04406	P04406	Glyceraldehyde-3-phosphate dehydrogenase	GAPDH	AAFNSGKVDIVAINDPFIDLNYMVYMFQYDS	797	P	6	1389		1	1.11613e-05	56.957	54.209	53.091	-1.3263	368160000	36	53.0911	1	1	1	56.957	53.091	54.583	NaN	NaN	NaN	NaN	1	56.9574	1.11613e-05	56.957	0	0	NaN	NaN	NaN	NaN	NaN	NaN	NaN	NaN	NaN	NaN	1	51.9557	0.00172956
P04792	168	P04792	P04792	Heat shock protein beta-1	HSPB1	VSSSLSPEGTLTVEAPMPKLATQSNEITIPV	798	P	3	1395		0.93001	9.12909e-05	74.28	63.67	57.496	-2.5865	51830000	168	11.4484	NaN	0.831253	0.93001	NaN	74.28	68.269	NaN	NaN	NaN	NaN	NaN	NaN	NaN	NaN	NaN	NaN	NaN	NaN	NaN	NaN	NaN	NaN	NaN	NaN	NaN	NaN	NaN	NaN	NaN
P04818	188	P04818	P04818	Thymidylate synthase	TYMS	DDRRIIMCAWNPRDLPLMALPPCHALCQFYV	799	P	4	1396		0.888268	0.000326637	51.568	46.807	50.705	1.0634	34761000	188	12.014	NaN	0.888268	NaN	NaN	51.568	NaN	NaN	NaN	NaN	NaN	NaN	NaN	NaN	NaN	NaN	NaN	NaN	NaN	NaN	NaN	NaN	NaN	NaN	NaN	NaN	NaN	NaN	NaN	NaN
P04844	226	P04844	P04844	Dolichyl-diphosphooligosaccharide--protein glycosyltransferase subunit 2	RPN2	FVAATYKLMDHVGTEPSIKEDQVIQLMNAIF	800	P	5	1398		1	3.02243e-09	130.65	124.94	45.332	-1.0564	731250000	226	45.3316	NaN	1	1	NaN	108.44	130.65	NaN	NaN	NaN	NaN	NaN	NaN	NaN	NaN	NaN	NaN	NaN	NaN	NaN	NaN	NaN	NaN	NaN	NaN	NaN	NaN	NaN	NaN	NaN
P05023	83	P05023	P05023	Sodium/potassium-transporting ATPase subunit alpha-1	ATP1A1	AAEILARDGPNALTPPPTTPEWIKFCRQLFG	801	P	2	1401		0.689941	0.0273098	67.456	39.174	67.456	1.9982	53606000	83	1.89395	0	0.689941	NaN	NaN	67.456	NaN	0	0	NaN	NaN	NaN	NaN	NaN	NaN	NaN	NaN	NaN	NaN	NaN	NaN	NaN	NaN	NaN	NaN	NaN	NaN	NaN	NaN	NaN
P05023	84	P05023	P05023	Sodium/potassium-transporting ATPase subunit alpha-1	ATP1A1	AEILARDGPNALTPPPTTPEWIKFCRQLFGG	802	P	2	1401		0.965635	0.00381323	115.92	98.709	115.92	-0.099832	352040000	84	14.365	0.965635	0.853695	0.876408	115.92	98.407	105.03	0.852216	7.14824	0.0499295	78.324	NaN	NaN	NaN	NaN	0.824622	7.25503	0.0205303	80.69	0.965635	14.365	0.00381323	115.92	NaN	NaN	NaN	NaN	NaN	NaN	NaN
P05023	87	P05023	P05023	Sodium/potassium-transporting ATPase subunit alpha-1	ATP1A1	LARDGPNALTPPPTTPEWIKFCRQLFGGFSM	803	P	2	1401		0.965635	0.00381323	115.92	98.709	115.92	-0.099832	352040000	87	14.365	0.965635	0.853695	0.876408	115.92	98.407	105.03	0.852216	7.14824	0.0499295	78.324	NaN	NaN	NaN	NaN	0.824622	7.25503	0.0205303	80.69	0.965635	14.365	0.00381323	115.92	NaN	NaN	NaN	NaN	NaN	NaN	NaN
P05023	501	P05023	P05023	Sodium/potassium-transporting ATPase subunit alpha-1	ATP1A1	NKYQLSIHKNPNTSEPQHLLVMKGAPERILD	804	P	6	1401		0.860402	9.53363e-05	50.492	45.824	50.492	0.14112	2731900000	501	7.90164	0.860402	NaN	NaN	50.492	NaN	NaN	0.860402	7.90164	9.53363e-05	50.492	NaN	NaN	NaN	NaN	NaN	NaN	NaN	NaN	NaN	NaN	NaN	NaN	NaN	NaN	NaN	NaN	NaN	NaN	NaN
P05129;P17252	185;185	P05129;P17252	P17252	Protein kinase C gamma type;Protein kinase C alpha type	PRKCG;PRKCA	ADEIHVTVGEARNLIPMDPNGLSDPYVKLKL;DEKLHVTVRDAKNLIPMDPNGLSDPYVKLKL	805	P	2	1408;1804		0.998717	0.00990529	105.03	79.558	93.623	-0.35579	457790000	185	28.9829	0.997562	0.998717	NaN	105.03	93.623	NaN	0.997562	26.1292	0.00990529	105.03	NaN	NaN	NaN	NaN	NaN	NaN	NaN	NaN	NaN	NaN	NaN	NaN	NaN	NaN	NaN	NaN	NaN	NaN	NaN
P05386	41	P05386	P05386	60S acidic ribosomal protein P1	RPLP1	DKINALIKAAGVNVEPFWPGLFAKALANVNI	806	P	2	1414		1	3.01547e-05	136.02	122.34	112.13	0.86956	7929800000	41	112.125	1	1	1	124.1	129.84	136.02	1	98.8983	0.00617824	101.39	1	72.5823	0.0745295	72.582	1	124.103	0.00538775	124.1	NaN	NaN	NaN	NaN	1	106.157	0.00380342	106.16	1	77.7442	0.05262
P05386	44	P05386	P05386	60S acidic ribosomal protein P1	RPLP1	NALIKAAGVNVEPFWPGLFAKALANVNIGSL	807	P	2	1414		1	3.01547e-05	136.02	122.34	112.13	0.86956	8707700000	44	112.125	1	1	1	124.42	128.01	136.02	1	98.8983	0.00617824	124.42	1	72.5823	0.00729406	108.1	1	124.103	0.00538775	124.1	NaN	NaN	NaN	NaN	1	106.157	0.00380342	106.16	1	77.7442	0.05262
P05386	68	P05386	P05386	60S acidic ribosomal protein P1	RPLP1	NVNIGSLICNVGAGGPAPAAGAAPAGGPAPS	808	P	4	1414		0.954591	7.17062e-17	100.71	97.307	80.749	-1.3673	2530900000	68	13.2482	0.954591	0.947861	0.923913	100.71	69.344	83.002	0.954591	13.2482	1.79002e-16	80.749	0.76069	5.09632	1.43395e-08	59.434	0.933281	11.4737	1.63964e-16	80.178	0.949186	12.7288	7.17062e-17	100.71	NaN	NaN	NaN	NaN	NaN	NaN	NaN
P05386	70	P05386	P05386	60S acidic ribosomal protein P1	RPLP1	NIGSLICNVGAGGPAPAAGAAPAGGPAPSTA	809	P	5	1414		0.485373	7.1015e-05	45.761	41.688	45.761	-0.18864	0	70	0	0.485373	0.329157	0.400962	45.761	40.289	42.47	NaN	NaN	NaN	NaN	0.485373	0	7.1015e-05	45.761	0	0	NaN	NaN	NaN	NaN	NaN	NaN	NaN	NaN	NaN	NaN	NaN	NaN	NaN
P05388;Q8NHW5	118;118	P05388	P05388	60S acidic ribosomal protein P0;60S acidic ribosomal protein P0-like	RPLP0;RPLP0P6	LANKVPAAARAGAIAPCEVTVPAQNTGLGPE	810	P	3	1416		0.999886	0.000402579	80.706	67.873	72.145	1.0778	1494200000	118	39.4397	0.999846	0.999369	0.999886	80.706	75.316	79.022	NaN	NaN	NaN	NaN	0.999008	30.0324	0.0180859	71.531	0.999846	38.1375	0.0389204	80.706	NaN	NaN	NaN	NaN	0.999821	37.4777	0.000402579	72.568	0.964693	14.3708	0.00542084
P05388;Q8NHW5	25;25	P05388	P05388	60S acidic ribosomal protein P0;60S acidic ribosomal protein P0-like	RPLP0;RPLP0P6	KSNYFLKIIQLLDDYPKCFIVGADNVGSKQM	811	P	3	1416		1	0.0300876	57.293	43.972	53.342	0.63434	25230000	25	53.3415	NaN	1	1	NaN	57.293	53.342	NaN	NaN	NaN	NaN	NaN	NaN	NaN	NaN	NaN	NaN	NaN	NaN	NaN	NaN	NaN	NaN	NaN	NaN	NaN	NaN	NaN	NaN	NaN
P05388	232	P05388	P05388	60S acidic ribosomal protein P0	RPLP0	EGVRNVASVCLQIGYPTVASVPHSIINGYKR	812	P	4	1416		0.995105	0.0141708	40.094	22.447	40.094	-0.50831	164790000	232	23.0815	NaN	NaN	0.995105	NaN	NaN	40.094	NaN	NaN	NaN	NaN	NaN	NaN	NaN	NaN	NaN	NaN	NaN	NaN	NaN	NaN	NaN	NaN	NaN	NaN	NaN	NaN	NaN	NaN	NaN
P05412	233	P05412	P05412	Transcription factor AP-1	JUN	QHPRLQALKEEPQTVPEMPGETPPLSPIDME	813	P	3	1417		0.961214	0.000183166	64.213	59.258	64.213	1.2995	14058000	233	16.8304	NaN	NaN	0.961214	NaN	NaN	64.213	NaN	NaN	NaN	NaN	NaN	NaN	NaN	NaN	NaN	NaN	NaN	NaN	NaN	NaN	NaN	NaN	NaN	NaN	NaN	NaN	NaN	NaN	NaN
P05423	113	P05423	P05423	DNA-directed RNA polymerase III subunit RPC4	POLR3D	GRPEVIQSHSIFEQGPAEMMKKKGNWDKTVD	814	P	4	1418		0.999985	0.00626892	48.229	40.425	48.229	4.0604	9244600	113	48.2287	NaN	NaN	0.999985	NaN	NaN	48.229	NaN	NaN	NaN	NaN	NaN	NaN	NaN	NaN	NaN	NaN	NaN	NaN	NaN	NaN	NaN	NaN	NaN	NaN	NaN	NaN	NaN	NaN	NaN
P05455	48	P05455	P05455	Lupus La protein	SSB	DKFLKEQIKLDEGWVPLEIMIKFNRLNRLTT	815	P	2	1419		1	1.00441e-05	109.84	98.076	109.84	-3.1013	25457000	48	109.845	1	1	NaN	90.614	109.84	NaN	NaN	NaN	NaN	NaN	NaN	NaN	NaN	NaN	1	90.6136	0.00967585	90.614	NaN	NaN	NaN	NaN	NaN	NaN	NaN	NaN	NaN	NaN	NaN
P05455	119	P05455	P05455	Lupus La protein	SSB	YKNDVKNRSVYIKGFPTDATLDDIKEWLEDK	816	P	4	1419		1	0.00206735	58.284	47.18	58.284	3.4895	311990000	119	58.2844	1	NaN	NaN	58.284	NaN	NaN	NaN	NaN	NaN	NaN	1	58.2844	0.00206735	58.284	NaN	NaN	NaN	NaN	NaN	NaN	NaN	NaN	NaN	NaN	NaN	NaN	NaN	NaN	NaN
P05556	296	P05556	P05556	Integrin beta-1	ITGB1	GFHFAGDGKLGGIVLPNDGQCHLENNMYTMS	817	P	4	1421		0.997504	2.66618e-09	63.516	60.618	63.516	0.12643	70264000	296	26.0173	0.996694	0.997504	NaN	44.616	63.516	NaN	NaN	NaN	NaN	NaN	NaN	NaN	NaN	NaN	NaN	NaN	NaN	NaN	0.996694	24.792	0.000369707	44.616	NaN	NaN	NaN	NaN	NaN	NaN	NaN
P06132	307	P06132	P06132	Uroporphyrinogen decarboxylase	UROD	RECVGKTVTLQGNLDPCALYASEEEIGQLVK	818	P	3	1426		1	0.000683469	67.877	65.448	51.857	0.14642	8371800	307	51.8567	1	NaN	NaN	67.877	NaN	NaN	NaN	NaN	NaN	NaN	NaN	NaN	NaN	NaN	NaN	NaN	NaN	NaN	NaN	NaN	NaN	NaN	NaN	NaN	NaN	NaN	1	51.8567	0.000683469
P06241	303	P06241	P06241	Tyrosine-protein kinase Fyn	FYN	GTWNGNTKVAIKTLKPGTMSPESFLEEAQIM	819	P	4	1428		0.949609	0.00266135	60.561	60.561	60.561	-0.1572	119830000	303	12.7533	0.949609	NaN	0.824687	60.561	NaN	54.225	NaN	NaN	NaN	NaN	0	0	NaN	NaN	NaN	NaN	NaN	NaN	0.949609	12.7533	0.00266135	60.561	NaN	NaN	NaN	NaN	NaN	NaN	NaN
P06241	308	P06241	P06241	Tyrosine-protein kinase Fyn	FYN	NTKVAIKTLKPGTMSPESFLEEAQIMKKLKH	820	P	3	1428		0.580831	0.000126639	83.776	83.776	83.776	0.28134	23234000	308	1.41661	0	0.580831	NaN	NaN	83.776	NaN	NaN	NaN	NaN	NaN	0	0	NaN	NaN	NaN	NaN	NaN	NaN	NaN	NaN	NaN	NaN	NaN	NaN	NaN	NaN	NaN	NaN	NaN
P06493	223	P06493	P06493	Cyclin-dependent kinase 1	CDK1	SEIDQLFRIFRALGTPNNEVWPEVESLQDYK	821	P	3	1432		0.999933	2.75158e-08	129.43	117.8	77.693	0.036063	1947000000	223	41.7531	0.999933	0.999141	0.999759	129.43	109.39	81.65	0.999819	37.4175	2.75158e-08	129.43	0.999933	41.7531	0.00177757	77.693	NaN	NaN	NaN	NaN	0.947278	12.5448	0.000262647	95.138	NaN	NaN	NaN	NaN	NaN	NaN	NaN
P06493	229	P06493	P06493	Cyclin-dependent kinase 1	CDK1	FRIFRALGTPNNEVWPEVESLQDYKNTFPKW	822	P	3	1432	+	1	2.10311e-08	129.43	117.8	129.43	-0.34502	2013300000	229	85.3758	1	1	1	129.43	121.79	81.65	1	85.3758	2.75158e-08	129.43	0.999995	52.7977	0.00177757	77.693	NaN	NaN	NaN	NaN	0.999998	56.0526	0.000262647	95.138	NaN	NaN	NaN	NaN	NaN	NaN	NaN
P06493	242	P06493	P06493	Cyclin-dependent kinase 1	CDK1	VWPEVESLQDYKNTFPKWKPGSLASHVKNLD	823	P	3	1432		0.932712	0.00686613	66.467	55.836	66.467	-1.1791	66263000	242	11.416	NaN	0.932712	0	NaN	66.467	NaN	NaN	NaN	NaN	NaN	NaN	NaN	NaN	NaN	NaN	NaN	NaN	NaN	NaN	NaN	NaN	NaN	NaN	NaN	NaN	NaN	NaN	NaN	NaN
P06493	285	P06493	P06493	Cyclin-dependent kinase 1	CDK1	YDPAKRISGKMALNHPYFNDLDNQIKKM___	824	P	4	1432		1	0.0140425	53.565	44.964	53.565	0.38263	28964000	285	53.5645	NaN	NaN	1	NaN	NaN	53.565	NaN	NaN	NaN	NaN	NaN	NaN	NaN	NaN	NaN	NaN	NaN	NaN	NaN	NaN	NaN	NaN	NaN	NaN	NaN	NaN	NaN	NaN	NaN
P06576	410	P06576	P06576	ATP synthase subunit beta, mitochondrial	ATP5B	YPAVDPLDSTSRIMDPNIVGSEHYDVARGVQ	825	P	4	1433		0.797451	8.67836e-08	70.578	61.96	70.578	-0.54349	61309000	410	6.30496	NaN	NaN	0.797451	NaN	NaN	70.578	NaN	NaN	NaN	NaN	NaN	NaN	NaN	NaN	NaN	NaN	NaN	NaN	NaN	NaN	NaN	NaN	NaN	NaN	NaN	NaN	NaN	NaN	NaN
P06733	172	P06733	P06733	Alpha-enolase	ENO1	SHAGNKLAMQEFMILPVGAANFREAMRIGAE	826	P	3	1436		1	1.40715e-05	90.729	83.017	90.729	-1.0362	2579300000	172	90.7288	NaN	1	1	NaN	87.352	90.729	NaN	NaN	NaN	NaN	NaN	NaN	NaN	NaN	NaN	NaN	NaN	NaN	NaN	NaN	NaN	NaN	NaN	NaN	NaN	NaN	NaN	NaN	NaN
P06733	295	P06733	P06733	Alpha-enolase	ENO1	YKSFIKDYPVVSIEDPFDQDDWGAWQKFTAS	827	P	2	1436		1	2.03897e-05	115.56	105.36	115.56	1.9257	417140000	295	67.1521	0.999998	1	0.99998	62.735	115.56	60.33	NaN	NaN	NaN	NaN	NaN	NaN	NaN	NaN	0.999998	56.3389	0.00722443	62.735	NaN	NaN	NaN	NaN	NaN	NaN	NaN	NaN	NaN	NaN	NaN
P06737	348	P06737	P06737	Glycogen phosphorylase, liver form	PYGL	QVAIQLNDTHPALAIPELMRIFVDIEKLPWS	828	P	3	1437		0.999675	9.05214e-29	162.91	158.79	131.94	0.41862	8475200000	348	34.8774	0.999524	0.999675	0.999574	149.57	162.91	149.66	0.994489	22.5641	0.000101413	107.75	0.999271	31.3706	3.29975e-06	115.89	0.999524	33.2239	2.6785e-20	149.57	0.985496	18.3355	0.000179468	90.37	NaN	NaN	NaN	NaN	NaN	NaN	NaN
P06737	635	P06737	P06737	Glycogen phosphorylase, liver form	PYGL	IIKLITSVADVVNNDPMVGSKLKVIFLENYR	829	P	3	1437		1	8.08636e-58	240.65	225.45	53.773	0.90126	970690000	635	53.7733	1	1	1	119.25	240.65	136.24	NaN	NaN	NaN	NaN	1	119.253	0.00354369	119.25	NaN	NaN	NaN	NaN	NaN	NaN	NaN	NaN	1	53.7733	0.0157238	53.773	NaN	NaN	NaN
P06737	382	P06737	P06737	Glycogen phosphorylase, liver form	PYGL	ELTQKTFAYTNHTVLPEALERWPVDLVEKLL	830	P	5	1437		0.99995	0.000416742	73.322	71.639	73.322	1.6529	113340000	382	42.9848	0.99995	0.999619	0.998655	73.322	72.425	44.811	0.99995	42.9848	0.000416742	73.322	NaN	NaN	NaN	NaN	NaN	NaN	NaN	NaN	NaN	NaN	NaN	NaN	NaN	NaN	NaN	NaN	NaN	NaN	NaN
P06737	389	P06737	P06737	Glycogen phosphorylase, liver form	PYGL	AYTNHTVLPEALERWPVDLVEKLLPRHLEII	831	P	5	1437		0.99995	0.000416742	73.322	71.639	73.322	1.6529	113340000	389	42.9848	0.99995	0.999906	0.999518	73.322	72.425	44.811	0.99995	42.9848	0.000416742	73.322	NaN	NaN	NaN	NaN	NaN	NaN	NaN	NaN	NaN	NaN	NaN	NaN	NaN	NaN	NaN	NaN	NaN	NaN	NaN
P06737	232	P06737	P06737	Glycogen phosphorylase, liver form	PYGL	IDTQVVLALPYDTPVPGYMNNTVNTMRLWSA	832	P	3	1437		0.926199	0.000250443	62.052	62.052	47.919	3.613	284800000	232	11.2209	0.926199	0.916259	NaN	56.234	62.052	NaN	NaN	NaN	NaN	NaN	0.926199	11.2209	0.00291062	47.919	0.896905	10.0483	0.000706759	56.234	NaN	NaN	NaN	NaN	NaN	NaN	NaN	NaN	NaN	NaN	NaN
P06744	403	P06744	P06744	Glucose-6-phosphate isomerase	GPI	QHAFYQLIHQGTKMIPCDFLIPVQTQHPIRK	833	P	4	1438		0.999872	0.000897843	66.809	65.511	65.107	0.091934	45949000	403	38.9605	0.999872	NaN	NaN	66.809	NaN	NaN	NaN	NaN	NaN	NaN	NaN	NaN	NaN	NaN	NaN	NaN	NaN	NaN	NaN	NaN	NaN	NaN	0.999548	33.449	0.00161112	66.809	0.999872	38.9605	0.000897843
P06744	377	P06744	P06744	Glucose-6-phosphate isomerase	GPI	KYITKSGTRVDHQTGPIVWGEPGTNGQHAFY	834	P	6	1438		1	9.76953e-07	89.793	84.581	41.218	-0.26279	1804100000	377	41.218	1	1	0.912737	84.478	80.593	89.793	1	71.6037	9.93984e-07	84.478	1	66.5802	9.76953e-07	66.58	1	61.3719	1.70665e-05	61.372	1	72.2145	9.95861e-07	72.214	NaN	NaN	NaN	NaN	NaN	NaN	NaN
P06744	383	P06744	P06744	Glucose-6-phosphate isomerase	GPI	GTRVDHQTGPIVWGEPGTNGQHAFYQLIHQG	835	P	6	1438		1	1.02294e-07	84.478	84.478	41.218	-0.26279	2100500000	383	41.218	1	1	NaN	84.478	58.522	NaN	1	71.6037	1.02294e-07	84.478	1	66.5802	9.76953e-07	71.159	1	61.3719	1.70665e-05	61.372	1	72.2145	9.95861e-07	72.214	NaN	NaN	NaN	NaN	NaN	NaN	NaN
P06744	120	P06744	P06744	Glucose-6-phosphate isomerase	GPI	NRSNTPILVDGKDVMPEVNKVLDKMKSFCQR	836	P	3	1438		0.99998	0.00843638	77.514	69.425	77.514	0.3719	1360400000	120	46.9208	NaN	0.99998	NaN	NaN	77.514	NaN	NaN	NaN	NaN	NaN	NaN	NaN	NaN	NaN	NaN	NaN	NaN	NaN	NaN	NaN	NaN	NaN	NaN	NaN	NaN	NaN	NaN	NaN	NaN
P06744	164	P06744	P06744	Glucose-6-phosphate isomerase	GPI	ITDVINIGIGGSDLGPLMVTEALKPYSSGGP	837	P	3	1438		1	3.89709e-82	208.82	177.22	50.432	0.38793	332720000	164	50.4323	0.999998	NaN	1	208.82	NaN	50.432	NaN	NaN	NaN	NaN	NaN	NaN	NaN	NaN	NaN	NaN	NaN	NaN	0.999998	56.6726	0	208.82	NaN	NaN	NaN	NaN	NaN	NaN	NaN
P06746	151	P06746	P06746	DNA polymerase beta	POLB	QRIGLKYFGDFEKRIPREEMLQMQDIVLNEV	838	P	4	1439		1	0.0030647	64.265	50.373	64.265	0.17633	112240000	151	64.2653	1	NaN	1	55.383	NaN	64.265	1	55.3828	0.00988825	55.383	NaN	NaN	NaN	NaN	1	49.0886	0.024581	49.089	NaN	NaN	NaN	NaN	NaN	NaN	NaN	NaN	NaN	NaN	NaN
P06748	11	P06748	P06748	Nucleophosmin	NPM1	_____MEDSMDMDMSPLRPQNYLFGCELKAD	839	P	2	1440		1	0.000342485	53.777	53.777	53.777	-0.52823	49783000	11	53.7773	1	1	NaN	44.196	53.777	NaN	NaN	NaN	NaN	NaN	1	44.1959	0.00188639	44.196	NaN	NaN	NaN	NaN	NaN	NaN	NaN	NaN	NaN	NaN	NaN	NaN	NaN	NaN	NaN
P06748	14	P06748	P06748	Nucleophosmin	NPM1	__MEDSMDMDMSPLRPQNYLFGCELKADKDY	840	P	2	1440		1	1.07642e-05	79.771	79.771	53.777	-0.52823	123800000	14	53.7773	1	1	NaN	79.771	53.777	NaN	NaN	NaN	NaN	NaN	1	44.1959	0.00188639	44.196	NaN	NaN	NaN	NaN	0.583335	1.48569	1.07642e-05	79.771	NaN	NaN	NaN	NaN	NaN	NaN	NaN
P06748	71	P06748	P06748	Nucleophosmin	NPM1	ELHIVEAEAMNYEGSPIKVTLATLKMSVQPT	841	P	4	1440		1	1.28768e-10	127.77	112.95	40.146	0.66754	45266000000	71	40.1459	1	1	1	71.881	127.31	127.77	1	55.985	0.00850513	55.985	1	71.8805	1.9239e-07	71.881	1	42.0241	2.18102e-06	62.383	1	54.4409	0.0677602	54.441	NaN	NaN	NaN	NaN	NaN	NaN	NaN
P06756	154	P06756	P06756	Integrin alpha-V;Integrin alpha-V heavy chain;Integrin alpha-V light chain	ITGAV	APLYHWRTEMKQEREPVGTCFLQDGTKTVEY	842	P	4	1442		1	5.23948e-09	121.74	100.14	121.74	-0.99146	41461000	154	121.739	NaN	1	NaN	NaN	121.74	NaN	NaN	NaN	NaN	NaN	NaN	NaN	NaN	NaN	NaN	NaN	NaN	NaN	NaN	NaN	NaN	NaN	NaN	NaN	NaN	NaN	NaN	NaN	NaN
P06865	397	P06865	P06865	Beta-hexosaminidase subunit alpha	HEXA	KIQPDTIIQVWREDIPVNYMKELELVTKAGF	843	P	4	1443		0.990352	0.00966217	47.73	38.186	47.73	0.35821	145400000	397	20.1134	NaN	NaN	0.990352	NaN	NaN	47.73	NaN	NaN	NaN	NaN	NaN	NaN	NaN	NaN	NaN	NaN	NaN	NaN	NaN	NaN	NaN	NaN	NaN	NaN	NaN	NaN	NaN	NaN	NaN
P07108	45	P07108	P07108	Acyl-CoA-binding protein	DBI	GHYKQATVGDINTERPGMLDFTGKAKWDAWN	844	P	3	1447		1	0.0044581	76.329	72.994	76.329	0.10993	72680000	45	76.3294	NaN	NaN	1	NaN	NaN	76.329	NaN	NaN	NaN	NaN	NaN	NaN	NaN	NaN	NaN	NaN	NaN	NaN	NaN	NaN	NaN	NaN	NaN	NaN	NaN	NaN	NaN	NaN	NaN
P07108	20	P07108	P07108	Acyl-CoA-binding protein	DBI	EFEKAAEEVRHLKTKPSDEEMLFIYGHYKQA	845	P	3	1447		1	0.00325185	91.207	87.303	71.692	1.1146	9161700000	20	71.6917	1	1	1	79.022	89.541	91.207	1	63.1281	0.0393473	63.128	1	75.961	0.00864134	79.022	NaN	NaN	NaN	NaN	1	75.961	0.00965746	77.146	1	74.8155	0.0113588	74.816	NaN	NaN	NaN
P07195	293	P07195	P07195	L-lactate dehydrogenase B chain	LDHB	VKGMYGIENEVFLSLPCILNARGLTSVINQK	846	P	2	1448		1	0.000447122	89.43	77.285	60.49	1.0353	46724000	293	60.4896	1	1	NaN	60.49	89.43	NaN	NaN	NaN	NaN	NaN	NaN	NaN	NaN	NaN	1	60.4896	0.0160263	60.49	NaN	NaN	NaN	NaN	NaN	NaN	NaN	NaN	NaN	NaN	NaN
P07195	76	P07195	P07195	L-lactate dehydrogenase B chain	LDHB	GEMMDLQHGSLFLQTPKIVADKDYSVTANSK	847	P	4	1448		1	3.93308e-07	74.769	68.009	74.769	2.543	489590000	76	74.7685	1	1	1	56.164	74.144	74.769	NaN	NaN	NaN	NaN	1	56.1642	3.88624e-05	56.164	NaN	NaN	NaN	NaN	NaN	NaN	NaN	NaN	NaN	NaN	NaN	NaN	NaN	NaN	NaN
P07196	252	P07196	P07196	Neurofilament light polypeptide	NEFL	QIQYAQISVEMDVTKPDLSAALKDIRAQYEK	848	P	5	1449		1	2.42986e-07	106.49	96.824	59.954	-0.8069	258250000	252	59.9542	1	1	1	62.105	106.49	48.449	NaN	NaN	NaN	NaN	NaN	NaN	NaN	NaN	1	62.1049	5.50831e-05	62.105	1	59.9542	9.34073e-07	59.954	NaN	NaN	NaN	NaN	1	57.8251	2.63776e-05
P07196	66	P07196	P07196	Neurofilament light polypeptide	NEFL	LSVRRSYSSSSGSLMPSLENLDLSQVAAISN	849	P	3	1449		1	4.51646e-05	91.371	81.583	43.992	-1.1514	310160000	66	43.9916	1	1	1	50.499	91.371	79.027	NaN	NaN	NaN	NaN	1	44.3012	0.00652979	44.301	NaN	NaN	NaN	NaN	NaN	NaN	NaN	NaN	1	42.5902	0.00796425	42.59	1	50.4989	0.00133378
P07237	493	P07237	P07237	Protein disulfide-isomerase	P4HB	AGDDDDLEDLEEAEEPDMEEDDDQKAVKDEL	850	P	4	1455		1	6.66499e-12	118.8	117.54	107.62	-0.46826	333050000	493	107.623	1	NaN	NaN	118.8	NaN	NaN	1	107.623	6.66499e-12	118.8	NaN	NaN	NaN	NaN	NaN	NaN	NaN	NaN	NaN	NaN	NaN	NaN	NaN	NaN	NaN	NaN	NaN	NaN	NaN
P07237	361	P07237	P07237	Protein disulfide-isomerase	P4HB	FLEGKIKPHLMSQELPEDWDKQPVKVLVGKN	851	P	4	1455		0.999998	0.0158548	64.723	57.929	62.617	-0.13569	949750000	361	57.4074	NaN	0.999998	NaN	NaN	64.723	NaN	NaN	NaN	NaN	NaN	NaN	NaN	NaN	NaN	NaN	NaN	NaN	NaN	NaN	NaN	NaN	NaN	NaN	NaN	NaN	NaN	NaN	NaN	NaN
P07237	368	P07237	P07237	Protein disulfide-isomerase	P4HB	PHLMSQELPEDWDKQPVKVLVGKNFEDVAFD	852	P	4	1455		0.999965	0.0158548	64.723	57.929	62.617	-0.13569	949750000	368	44.6045	NaN	0.999965	NaN	NaN	64.723	NaN	NaN	NaN	NaN	NaN	NaN	NaN	NaN	NaN	NaN	NaN	NaN	NaN	NaN	NaN	NaN	NaN	NaN	NaN	NaN	NaN	NaN	NaN	NaN
P07237	313	P07237	P07237	Protein disulfide-isomerase	P4HB	NQRILEFFGLKKEECPAVRLITLEEEMTKYK	853	P	4	1455		1	0.0297974	54.44	44.703	53.981	-0.23134	96331000	313	53.9812	NaN	1	NaN	NaN	54.44	NaN	NaN	NaN	NaN	NaN	NaN	NaN	NaN	NaN	NaN	NaN	NaN	NaN	NaN	NaN	NaN	NaN	NaN	NaN	NaN	NaN	NaN	NaN	NaN
P07237	395	P07237	P07237	Protein disulfide-isomerase	P4HB	VAFDEKKNVFVEFYAPWCGHCKQLAPIWDKL	854	P	2	1455		1	1.39629e-07	172.92	164.82	158.41	-0.60841	2844900000	395	158.406	1	1	1	172.92	164.04	158.41	1	137.168	0.00703221	137.17	1	121.076	0.0127705	121.08	1	109.236	0.00702515	109.24	1	104.824	0.0160638	104.82	1	151.096	1.39629e-07	172.92	1	93.5609	0.0398576
P07237	51	P07237	P07237	Protein disulfide-isomerase	P4HB	EALAAHKYLLVEFYAPWCGHCKALAPEYAKA	855	P	2	1455		1	0.0136264	88.681	80.082	88.681	-1.8906	18712000	51	88.6806	1	1	NaN	88.681	49.662	NaN	NaN	NaN	NaN	NaN	1	72.8808	0.0136264	72.881	1	88.6806	0.0223276	88.681	NaN	NaN	NaN	NaN	NaN	NaN	NaN	NaN	NaN	NaN	NaN
P07339	328	P07339	P07339	Cathepsin D;Cathepsin D light chain;Cathepsin D heavy chain	CTSD	KAIGAVPLIQGEYMIPCEKVSTLPAITLKLG	856	P	3	1458		0.99699	0.0347395	48.883	44.266	48.883	-0.99735	416560000	328	25.2006	NaN	0.99699	NaN	NaN	48.883	NaN	NaN	NaN	NaN	NaN	NaN	NaN	NaN	NaN	NaN	NaN	NaN	NaN	NaN	NaN	NaN	NaN	NaN	NaN	NaN	NaN	NaN	NaN	NaN
P07437;Q13509;Q13885;Q9BVA1	70;70;70;70	P07437;Q13509;Q13885;Q9BVA1	P07437	Tubulin beta chain;Tubulin beta-3 chain;Tubulin beta-2A chain;Tubulin beta-2B chain	TUBB;TUBB3;TUBB2A;TUBB2B	AGNKYVPRAILVDLEPGTMDSVRSGPFGQIF;SSHKYVPRAILVDLEPGTMDSVRSGAFGHLF;TGGKYVPRAILVDLEPGTMDSVRSGPFGQIF;TGNKYVPRAILVDLEPGTMDSVRSGPFGQIF	857	P	2	1461;3612;3678;7544		1	0.00792675	133.89	112.5	69.979	0.33822	17521000000	70	69.9792	1	1	1	114.89	133.89	106.29	1	105.46	0.0153474	105.46	NaN	NaN	NaN	NaN	NaN	NaN	NaN	NaN	1	111.855	0.00882363	111.86	1	114.894	0.0101242	114.89	NaN	NaN	NaN
P07437	305	P07437	P07437	Tubulin beta chain	TUBB	TQQVFDAKNMMAACDPRHGRYLTVAAVFRGR	858	P	2	1461		1	0.004679	67.032	65.188	67.032	0.02122	5985400000	305	67.032	1	0.999365	0.998202	67.032	55.228	41.904	NaN	NaN	NaN	NaN	NaN	NaN	NaN	NaN	NaN	NaN	NaN	NaN	NaN	NaN	NaN	NaN	1	67.032	0.0349331	67.032	NaN	NaN	NaN
P07437;P68371	160;160	P07437;P68371	P68371	Tubulin beta chain;Tubulin beta-4B chain	TUBB;TUBB4B	SGMGTLLISKIREEYPDRIMNTFSVVPSPKV	859	P	4	1461;3076		1	1.83428e-05	100.92	9.9463	99.508	-0.3411	4576100000	160	92.5196	1	1	1	93.684	99.508	100.92	1	82.0616	0.000111049	93.684	NaN	NaN	NaN	NaN	1	73.0655	3.39879e-05	80.156	1	82.5699	0.000175617	89.668	1	74.6598	0.000502342	82.586	NaN	NaN	NaN
P07741	93	P07741	P07741	Adenine phosphoribosyltransferase	APRT	ELGLGCVLIRKRGKLPGPTLWASYSLEYGKA	860	P	2	1467		1	4.51523e-05	117.79	87.461	117.79	2.6743	652530000	93	117.792	1	1	1	91.086	79.492	117.79	1	82.1748	0.000939585	88.668	1	89.4444	0.00114519	91.086	1	77.8456	0.000339926	79.512	0.999985	48.2943	0.00104025	58.688	1	74.3925	0.0641717	74.392	NaN	NaN	NaN
P07741	95	P07741	P07741	Adenine phosphoribosyltransferase	APRT	GLGCVLIRKRGKLPGPTLWASYSLEYGKAEL	861	P	2	1467		1	4.51523e-05	117.79	87.461	117.79	2.6743	652530000	95	117.792	1	1	1	91.086	79.492	117.79	1	87.0015	0.000939585	88.668	1	89.4444	0.00114519	91.086	1	77.9097	0.000339926	79.512	0.999998	56.9623	0.00104025	58.688	1	74.3925	0.0641717	74.392	NaN	NaN	NaN
P07814	1472	P07814	P07814	Bifunctional glutamate/proline--tRNA ligase;Glutamate--tRNA ligase;Proline--tRNA ligase	EPRS	IKKTTARDQDLEPGAPSMGAKSLCIPFKPLC	862	P	2	1468		0.999621	0.0172536	118.9	108.95	111.5	0.12687	517200000	1472	34.2087	0.999621	0.955994	0.998732	111.5	118.77	118.9	0.996615	24.69	0.075253	45.696	NaN	NaN	NaN	NaN	NaN	NaN	NaN	NaN	NaN	NaN	NaN	NaN	0.999621	34.2087	0.0396177	111.5	0.935296	11.6002	0.0704386
P07814	736	P07814	P07814	Bifunctional glutamate/proline--tRNA ligase;Glutamate--tRNA ligase;Proline--tRNA ligase	EPRS	VEATKNETSAPFKERPTPSLNNNCTTSEDSL	863	P	3	1468		0.547263	0.0122753	61.222	57.732	61.222	-1.432	142280000	736	0.823504	0.537866	0.547263	0	51.834	61.222	NaN	NaN	NaN	NaN	NaN	NaN	NaN	NaN	NaN	NaN	NaN	NaN	NaN	NaN	NaN	NaN	NaN	0.537866	0.659054	0.0410605	51.834	NaN	NaN	NaN
P07814	738	P07814	P07814	Bifunctional glutamate/proline--tRNA ligase;Glutamate--tRNA ligase;Proline--tRNA ligase	EPRS	ATKNETSAPFKERPTPSLNNNCTTSEDSLVL	864	P	3	1468		0.941181	0.00373298	69.922	66.792	57.826	0.98539	185050000	738	12.0416	0.941181	0.847322	0.941181	69.922	61.222	69.922	0.837615	7.12499	0.0377632	52.909	0.578073	1.36746	0.00808239	62.589	0.855743	7.73206	0.00373298	69.922	NaN	NaN	NaN	NaN	0.941181	12.0416	0.00930625	62.19	0.853639	7.65849	0.00425275
P07814	453	P07814	P07814	Bifunctional glutamate/proline--tRNA ligase;Glutamate--tRNA ligase;Proline--tRNA ligase	EPRS	LTWFVNEGLVDGWDDPRFPTVRGVLRRGMTV	865	P	3	1468		1	0.0129908	56.298	49.865	45.413	2.8763	219660000	453	45.4131	1	1	NaN	54.223	56.298	NaN	1	54.2226	0.0129908	54.223	NaN	NaN	NaN	NaN	NaN	NaN	NaN	NaN	0	0	NaN	NaN	NaN	NaN	NaN	NaN	NaN	NaN	NaN
P07814	456	P07814	P07814	Bifunctional glutamate/proline--tRNA ligase;Glutamate--tRNA ligase;Proline--tRNA ligase	EPRS	FVNEGLVDGWDDPRFPTVRGVLRRGMTVEGL	866	P	3	1468		1	0.0129908	56.298	49.865	45.413	2.8763	219660000	456	45.4131	1	1	NaN	54.223	56.298	NaN	1	54.2226	0.0129908	54.223	NaN	NaN	NaN	NaN	NaN	NaN	NaN	NaN	0	0	NaN	NaN	NaN	NaN	NaN	NaN	NaN	NaN	NaN
P07814	543	P07814	P07814	Bifunctional glutamate/proline--tRNA ligase;Glutamate--tRNA ligase;Proline--tRNA ligase	EPRS	KEVAKHPKNPEVGLKPVWYSPKVFIEGADAE	867	P	2	1468		1	2.29094e-18	203.83	176.06	191.53	-0.43118	304080000	543	179.661	1	1	NaN	167.18	203.83	NaN	NaN	NaN	NaN	NaN	NaN	NaN	NaN	NaN	1	158.175	0.00173522	167.18	0	0	NaN	NaN	NaN	NaN	NaN	NaN	NaN	NaN	NaN
P07814	548	P07814	P07814	Bifunctional glutamate/proline--tRNA ligase;Glutamate--tRNA ligase;Proline--tRNA ligase	EPRS	HPKNPEVGLKPVWYSPKVFIEGADAETFSEG	868	P	2	1468		1	2.29094e-18	203.83	176.06	203.83	-0.030834	282800000	548	177.816	1	1	NaN	167.18	203.83	NaN	NaN	NaN	NaN	NaN	NaN	NaN	NaN	NaN	1	142.924	0.00173522	167.18	0	0	NaN	NaN	NaN	NaN	NaN	NaN	NaN	NaN	NaN
P07814	1115	P07814	P07814	Bifunctional glutamate/proline--tRNA ligase;Glutamate--tRNA ligase;Proline--tRNA ligase	EPRS	EVAWVTRSGKTELAEPIAIRPTSETVMYPAY	869	P	3	1468		0.52141	0.00930625	62.19	42.812	62.19	0.2972	53491000	1115	0.487208	0.493777	0.52141	0	54.223	62.19	NaN	0.493777	0	0.0155891	54.223	NaN	NaN	NaN	NaN	NaN	NaN	NaN	NaN	NaN	NaN	NaN	NaN	0	0	NaN	NaN	NaN	NaN	NaN
P07814	1120	P07814	P07814	Bifunctional glutamate/proline--tRNA ligase;Glutamate--tRNA ligase;Proline--tRNA ligase	EPRS	TRSGKTELAEPIAIRPTSETVMYPAYAKWVQ	870	P	3	1468		0.964873	2.30647e-18	152.35	141.04	68.49	1.4154	6643300000	1120	15.4304	0.874899	0.914864	0.964873	103.63	152.35	69.779	0.794522	6.28671	0.00150909	103.63	NaN	NaN	NaN	NaN	0.874899	8.62486	2.67349e-05	101.36	NaN	NaN	NaN	NaN	0.848286	7.54218	0.00065015	80.752	NaN	NaN	NaN
P07814	1128	P07814	P07814	Bifunctional glutamate/proline--tRNA ligase;Glutamate--tRNA ligase;Proline--tRNA ligase	EPRS	AEPIAIRPTSETVMYPAYAKWVQSHRDLPIK	871	P	4	1468		0.999624	9.22022e-05	102.97	91.868	84.318	-0.25414	3444900000	1128	34.2629	0.999624	0.996981	0.997205	84.318	73.676	102.97	NaN	NaN	NaN	NaN	NaN	NaN	NaN	NaN	0.999624	34.2629	0.000117133	84.318	NaN	NaN	NaN	NaN	0	0	NaN	NaN	NaN	NaN	NaN
P07900;P08238;Q58FF7	395;387;329	P07900;P08238	P08238	Heat shock protein HSP 90-alpha;Heat shock protein HSP 90-beta;Putative heat shock protein HSP 90-beta-3	HSP90AA1;HSP90AB1;HSP90AB3P	EYLNFIRGVVDSEDLPLNISREMLQQSKILK	872	P	2	1471;1492		1	1.85487e-05	109.15	99.609	109.15	0.22743	31854000	387	109.145	1	1	NaN	109.15	106.32	NaN	NaN	NaN	NaN	NaN	NaN	NaN	NaN	NaN	NaN	NaN	NaN	NaN	NaN	NaN	NaN	NaN	NaN	NaN	NaN	NaN	1	109.145	1.85487e-05
P07900	524	P07900	P07900	Heat shock protein HSP 90-alpha	HSP90AA1	ERLRKHGLEVIYMIEPIDEYCVQQLKEFEGK	873	P	3	1471		1	0.0012879	78.717	66.281	78.717	1.0024	381890000	524	78.7167	1	1	1	61.957	44.089	78.717	NaN	NaN	NaN	NaN	NaN	NaN	NaN	NaN	NaN	NaN	NaN	NaN	NaN	NaN	NaN	NaN	1	56.1489	0.00352494	56.149	1	55.9069	0.0012879
P07900	717	P07900	P07900	Heat shock protein HSP 90-alpha	HSP90AA1	DPTADDTSAAVTEEMPPLEGDDDTSRMEEVD	874	P	4	1471		0.548569	4.21065e-10	64.273	59.956	64.273	1.6486	1058300000	717	0.846418	0.548569	0.535929	0.499994	64.273	60.876	51.607	0.499953	0	2.23153e-05	52.347	0.548569	0.846418	4.21065e-10	64.273	0.499032	0	6.87401e-05	48.388	0.499983	0	6.22316e-07	53.728	NaN	NaN	NaN	NaN	NaN	NaN	NaN
P07900	718	P07900	P07900	Heat shock protein HSP 90-alpha	HSP90AA1	PTADDTSAAVTEEMPPLEGDDDTSRMEEVD_	875	P	4	1471		0.499998	1.35377e-07	60.876	56.723	60.876	-0.71694	208920000	718	0	0.499983	0.499998	0.499994	53.728	60.876	51.607	0.499953	0	2.23153e-05	52.347	NaN	NaN	NaN	NaN	0.499032	0	6.87401e-05	48.388	0.499983	0	6.22316e-07	53.728	NaN	NaN	NaN	NaN	NaN	NaN	NaN
P07900	596	P07900	P07900	Heat shock protein HSP 90-alpha	HSP90AA1	KKVEKVVVSNRLVTSPCCIVTSTYGWTANME	876	P	3	1471		1	2.37862e-05	92.265	86.06	50.956	-2.0494	32626000	596	50.9562	1	1	NaN	50.956	92.265	NaN	NaN	NaN	NaN	NaN	NaN	NaN	NaN	NaN	NaN	NaN	NaN	NaN	1	50.9562	0.00552496	50.956	NaN	NaN	NaN	NaN	NaN	NaN	NaN
P07900	301	P07900	P07900	Heat shock protein HSP 90-alpha	HSP90AA1	DQEELNKTKPIWTRNPDDITNEEYGEFYKSL	877	P	4	1471		1	4.29739e-08	119.79	106.6	60.032	0.91023	6151000000	301	60.0318	1	1	1	112.54	119.79	95.48	1	112.543	1.31929e-07	112.54	0.5	0	0.00342604	60.747	1	82.5037	0.000391325	82.504	1	71.1739	0.00173398	71.174	1	56.936	0.0180395	66.644	1	104.44	6.54229e-07
P07900;Q14568	295;294	P07900	P07900	Heat shock protein HSP 90-alpha;Heat shock protein HSP 90-alpha A2	HSP90AA1;HSP90AA2P	IKEKYIDQEELNKTKPIWTRNPDDITNEEYG	878	P	4	1471		1	4.29739e-08	150.57	129.92	71.354	0.26197	8671000000	295	71.3538	1	1	1	115.5	140.74	150.57	1	112.543	1.31929e-07	112.54	1	62.6458	0.000187546	87.932	1	89.8657	4.79773e-05	115.5	1	71.1739	0.00173398	71.174	1	56.936	0.0180395	66.644	1	104.44	6.54229e-07
P07900	379	P07900	P07900	Heat shock protein HSP 90-alpha	HSP90AA1	YVRRVFIMDNCEELIPEYLNFIRGVVDSEDL	879	P	3	1471		1	0.00888715	51.487	45.604	51.487	-0.21549	535620000	379	51.4872	1	1	1	45.916	44.089	51.487	0	0	NaN	NaN	1	43.9551	0.0401519	43.955	1	45.9158	0.0312235	45.916	NaN	NaN	NaN	NaN	NaN	NaN	NaN	NaN	NaN	NaN	NaN
P07910	112	P07910	P07910	Heterogeneous nuclear ribonucleoproteins C1/C2	HNRNPC	VKRSAAEMYGSVTEHPSPSPLLSSSFDLDYD	880	P	5	1473		0.85697	2.74027e-06	54.326	52.955	54.326	-0.33342	12874000	112	8.47074	NaN	NaN	0.85697	NaN	NaN	54.326	NaN	NaN	NaN	NaN	NaN	NaN	NaN	NaN	NaN	NaN	NaN	NaN	NaN	NaN	NaN	NaN	NaN	NaN	NaN	NaN	NaN	NaN	NaN
P07947	309	P07947	P07947	Tyrosine-protein kinase Yes	YES1	GTWNGTTKVAIKTLKPGTMMPEAFLQEAQIM	881	P	4	1476		0.995716	0.00261646	65.855	65.855	57.293	-1.0135	107510000	309	23.9231	NaN	0.995716	NaN	NaN	65.855	NaN	NaN	NaN	NaN	NaN	NaN	NaN	NaN	NaN	NaN	NaN	NaN	NaN	NaN	NaN	NaN	NaN	NaN	NaN	NaN	NaN	NaN	NaN	NaN
P07947	314	P07947	P07947	Tyrosine-protein kinase Yes	YES1	TTKVAIKTLKPGTMMPEAFLQEAQIMKKLRH	882	P	3	1476		0.55928	0.000782295	65.25	65.25	65.25	-1.1195	37416000	314	1.0467	0.55928	NaN	NaN	65.25	NaN	NaN	NaN	NaN	NaN	NaN	NaN	NaN	NaN	NaN	NaN	NaN	NaN	NaN	0.55928	1.0467	0.000782295	65.25	NaN	NaN	NaN	NaN	NaN	NaN	NaN
P07948	279	P07948	P07948	Tyrosine-protein kinase Lyn	LYN	GYYNNSTKVAVKTLKPGTMSVQAFLEEANLM	883	P	3	1477		1	0.000495159	91.725	88.924	76.027	0.4765	880680000	279	76.0266	1	1	1	91.725	81.665	76.027	0	0	NaN	NaN	1	91.7247	0.000709772	91.725	NaN	NaN	NaN	NaN	NaN	NaN	NaN	NaN	NaN	NaN	NaN	NaN	NaN	NaN	NaN
P07954	363	P07954	P07954	Fumarate hydratase, mitochondrial	FH	GPRSGLGELILPENEPGSSIMPGKVNPTQCE	884	P	2	1478		0.976035	5.77838e-14	151.74	124.77	112.51	-0.29034	1509100000	363	18.6836	0.976035	0.961801	0.936843	151.74	151.44	119.01	NaN	NaN	NaN	NaN	NaN	NaN	NaN	NaN	0.958844	15.1318	2.2928e-05	100.55	NaN	NaN	NaN	NaN	0.976035	18.6836	5.77838e-14	151.74	NaN	NaN	NaN
P07954	192	P07954	P07954	Fumarate hydratase, mitochondrial	FH	PNDHVNKSQSSNDTFPTAMHIAAAIEVHEVL	885	P	3	1478		0.999969	4.01484e-05	67.69	62.531	67.69	0.85317	107300000	192	45.0431	0.999474	0.999969	NaN	43.068	67.69	NaN	0.999474	32.7913	0.00280268	43.068	NaN	NaN	NaN	NaN	NaN	NaN	NaN	NaN	NaN	NaN	NaN	NaN	NaN	NaN	NaN	NaN	NaN	NaN	NaN
P08069	989	P08069	P08069	Insulin-like growth factor 1 receptor;Insulin-like growth factor 1 receptor alpha chain;Insulin-like growth factor 1 receptor beta chain	IGF1R	ASVNPEYFSAADVYVPDEWEVAREKITMSRE	886	P	3	1482		0.996377	0.0113244	50.493	44.891	50.493	-3.5027	0	989	24.3941	NaN	NaN	0.996377	NaN	NaN	50.493	NaN	NaN	NaN	NaN	NaN	NaN	NaN	NaN	NaN	NaN	NaN	NaN	NaN	NaN	NaN	NaN	NaN	NaN	NaN	NaN	NaN	NaN	NaN
P08069	1096	P08069	P08069	Insulin-like growth factor 1 receptor;Insulin-like growth factor 1 receptor alpha chain;Insulin-like growth factor 1 receptor beta chain	IGF1R	LMTRGDLKSYLRSLRPEMENNPVLAPPSLSK	887	P	3	1482		0.999993	0.000217011	99.508	89.134	94.856	0.66754	907000000	1096	51.7405	0.999993	0.999787	0.999991	94.856	69.747	99.508	0.999847	38.1736	0.0114793	73.21	NaN	NaN	NaN	NaN	0.999993	51.7405	0.000943182	94.856	0.999273	31.3827	0.00537021	81.356	NaN	NaN	NaN	NaN	NaN	NaN	NaN
P08134;P61586	108;108	P08134;P61586	P61586	Rho-related GTP-binding protein RhoC;Transforming protein RhoA	RHOC;RHOA	ENIPEKWTPEVKHFCPNVPIILVGNKKDLRN;ENIPEKWTPEVKHFCPNVPIILVGNKKDLRQ	888	P	4	1484;2944		0.999406	0.00228755	73.877	67.714	73.877	-0.038971	518480000	108	32.2561	0.999024	0.999406	0.998142	73.037	73.877	51.726	0.97003	15.1009	0.0271514	51.546	NaN	NaN	NaN	NaN	0.99358	21.8964	0.00712129	63.766	NaN	NaN	NaN	NaN	0.996569	24.6309	0.0335532	73.037	0.999024	30.0996	0.037501
P08183	517	P08183	P08183	Multidrug resistance protein 1	ABCB1	KAVKEANAYDFIMKLPHKFDTLVGERGAQLS	889	P	4	1487		1	0.000443725	68.762	56.328	68.762	1.5374	21448000	517	68.7615	NaN	1	NaN	NaN	68.762	NaN	NaN	NaN	NaN	NaN	NaN	NaN	NaN	NaN	NaN	NaN	NaN	NaN	NaN	NaN	NaN	NaN	NaN	NaN	NaN	NaN	NaN	NaN	NaN
P08237	411	P08237	P08237	ATP-dependent 6-phosphofructokinase, muscle type	PFKM	SKSGSHTVAVMNVGAPAAGMNAAVRSTVRIG	890	P	3	1491		1	7.4876e-32	196.33	175.38	53.553	-0.43959	197570000	411	53.5528	1	1	1	117.08	196.33	146.59	NaN	NaN	NaN	NaN	1	117.081	6.58303e-07	117.08	NaN	NaN	NaN	NaN	NaN	NaN	NaN	NaN	NaN	NaN	NaN	NaN	1	53.5528	0.00305624
P08238;Q58FF7	516;389	P08238	P08238	Heat shock protein HSP 90-beta;Putative heat shock protein HSP 90-beta-3	HSP90AB1;HSP90AB3P	ERVRKRGFEVVYMTEPIDEYCVQQLKEFDGK	891	P	3	1492		1	0.000465616	73.036	15.458	42.123	0.87429	1527100000	516	42.1233	1	1	1	72.227	73.036	57.147	1	49.2502	0.00978117	49.25	1	59.9429	0.00232876	59.943	1	56.2982	0.000526903	72.227	NaN	NaN	NaN	NaN	1	54.7404	0.00395648	57.045	1	44.0536	0.000801042
P08238	630	P08238	P08238	Heat shock protein HSP 90-beta	HSP90AB1	STMGYMMAKKHLEINPDHPIVETLRQKAEAD	892	P	3	1492		1	1.11668e-13	186.76	146.04	56.817	-1.9269	3811700000	630	56.8168	1	1	1	113.35	186.76	81.632	1	82.9077	0.0262142	82.908	1	57.4342	0.00288471	113.35	1	57.2674	0.00673487	95.651	0	0	NaN	NaN	NaN	NaN	NaN	NaN	NaN	NaN	NaN
P08238	633	P08238	P08238	Heat shock protein HSP 90-beta	HSP90AB1	GYMMAKKHLEINPDHPIVETLRQKAEADKND	893	P	3	1492		1	1.11668e-13	186.76	146.04	56.817	-1.9269	3830400000	633	56.8168	1	1	1	113.35	186.76	81.632	1	82.9077	0.0262142	82.908	1	57.4342	0.00288471	113.35	1	57.2674	0.00673487	95.651	0	0	NaN	NaN	NaN	NaN	NaN	NaN	NaN	NaN	NaN
P08238	709	P08238	P08238	Heat shock protein HSP 90-beta	HSP90AB1	EVAAEEPNAAVPDEIPPLEGDEDASRMEEVD	894	P	4	1492		0.456583	0.000220832	44.107	41.208	44.107	-0.13375	0	709	0	0.456583	NaN	NaN	44.107	NaN	NaN	0.456583	0	0.000220832	44.107	NaN	NaN	NaN	NaN	NaN	NaN	NaN	NaN	NaN	NaN	NaN	NaN	NaN	NaN	NaN	NaN	NaN	NaN	NaN
P08238	710	P08238	P08238	Heat shock protein HSP 90-beta	HSP90AB1	VAAEEPNAAVPDEIPPLEGDEDASRMEEVD_	895	P	4	1492		0.456583	0.000220832	44.107	41.208	44.107	-0.13375	0	710	0	0.456583	NaN	NaN	44.107	NaN	NaN	0.456583	0	0.000220832	44.107	NaN	NaN	NaN	NaN	NaN	NaN	NaN	NaN	NaN	NaN	NaN	NaN	NaN	NaN	NaN	NaN	NaN	NaN	NaN
P08238	588	P08238	P08238	Heat shock protein HSP 90-beta	HSP90AB1	KKVEKVTISNRLVSSPCCIVTSTYGWTANME	896	P	3	1492		1	5.66086e-09	112.72	101.25	71.535	-0.47981	2008300000	588	71.5347	1	1	1	65.092	112.72	91.441	1	49.4818	0.0358389	49.482	1	41.2572	0.033246	41.257	1	48.2287	0.0128865	48.229	1	48.2287	0.00236743	65.092	NaN	NaN	NaN	NaN	NaN	NaN	NaN
P08238	287	P08238	P08238	Heat shock protein HSP 90-beta	HSP90AB1	IKEKYIDQEELNKTKPIWTRNPDDITQEEYG	897	P	4	1492		1	1.59682e-09	150.57	129.92	71.354	0.26197	13295000000	287	71.3538	1	1	1	124.31	140.74	150.57	1	61.222	4.65045e-08	119.27	1	62.6458	3.06932e-08	115.46	1	89.8657	1.59682e-09	124.31	1	102.433	8.04571e-07	102.43	1	63.5783	0.000129553	99.508	1	63.454	0.00223115
P08238	293	P08238	P08238	Heat shock protein HSP 90-beta	HSP90AB1	DQEELNKTKPIWTRNPDDITQEEYGEFYKSL	898	P	4	1492		1	1.59682e-09	124.31	113.89	59.339	-0.3268	9991900000	293	59.339	1	1	1	124.31	111.81	105.32	1	61.222	4.65045e-08	119.27	1	75.961	3.06932e-08	115.46	1	96.0163	1.59682e-09	124.31	1	102.433	8.04571e-07	102.43	1	63.5783	0.000129553	99.508	1	63.454	0.00223115
P08238	371	P08238	P08238	Heat shock protein HSP 90-beta	HSP90AB1	YVRRVFIMDSCDELIPEYLNFIRGVVDSEDL	899	P	2	1492		1	0.00100753	75.819	62.683	75.819	2.2122	166970000	371	75.8194	1	1	NaN	44.587	75.819	NaN	NaN	NaN	NaN	NaN	NaN	NaN	NaN	NaN	1	44.5871	0.0372739	44.587	NaN	NaN	NaN	NaN	NaN	NaN	NaN	NaN	NaN	NaN	NaN
P08240	530	P08240	P08240	Signal recognition particle receptor subunit alpha	SRPR	DVVLVDTAGRMQDNAPLMTALAKLITVNTPD	900	P	3	1493		1	2.91024e-06	122.04	115.88	48.204	2.7605	764670000	530	48.2042	1	1	1	61.344	122.04	99.954	1	61.3438	0.0349266	61.344	1	57.8855	0.0458979	57.885	NaN	NaN	NaN	NaN	NaN	NaN	NaN	NaN	NaN	NaN	NaN	NaN	NaN	NaN	NaN
P08243	433	P08243	P08243	Asparagine synthetase [glutamine-hydrolyzing]	ASNS	VPFLDHRFSSYYLSLPPEMRIPKNGIEKHLL	901	P	5	1494		0.53318	0.00434096	40.544	31.555	40.544	-0.07404	77031000	433	0.577746	NaN	0.53318	NaN	NaN	40.544	NaN	NaN	NaN	NaN	NaN	NaN	NaN	NaN	NaN	NaN	NaN	NaN	NaN	NaN	NaN	NaN	NaN	NaN	NaN	NaN	NaN	NaN	NaN	NaN
P08243	434	P08243	P08243	Asparagine synthetase [glutamine-hydrolyzing]	ASNS	PFLDHRFSSYYLSLPPEMRIPKNGIEKHLLR	902	P	5	1494		0.802963	9.24358e-06	72.603	67.794	72.603	-0.23891	377860000	434	6.10148	NaN	0.773277	0.802963	NaN	44.365	72.603	NaN	NaN	NaN	NaN	NaN	NaN	NaN	NaN	NaN	NaN	NaN	NaN	NaN	NaN	NaN	NaN	NaN	NaN	NaN	NaN	NaN	NaN	NaN
P08397	208	P08397	P08397	Porphobilinogen deaminase	HMBS	LQRMGWHNRVGQILHPEECMYAVGQGALGVE	903	P	3	1496		1	1.64166e-06	111.67	110.49	111.67	-0.015794	128880000	208	111.672	1	NaN	NaN	111.67	NaN	NaN	NaN	NaN	NaN	NaN	1	111.672	1.64166e-06	111.67	NaN	NaN	NaN	NaN	NaN	NaN	NaN	NaN	NaN	NaN	NaN	NaN	NaN	NaN	NaN
P08572	976	P08572	P08572	Collagen alpha-2(IV) chain;Canstatin	COL4A2	AGEPGFKGSRGDPGPPGPPPVILPGMKDIKG	904	P	2	1498		0.988455	0.000290679	117.09	75.407	100.55	1.1548	50687000	976	20.7336	0.988455	0.974323	NaN	100.55	117.09	NaN	NaN	NaN	NaN	NaN	NaN	NaN	NaN	NaN	0.988455	20.7336	0.000509142	100.55	NaN	NaN	NaN	NaN	NaN	NaN	NaN	NaN	NaN	NaN	NaN
P08572	984	P08572	P08572	Collagen alpha-2(IV) chain;Canstatin	COL4A2	SRGDPGPPGPPPVILPGMKDIKGEKGDEGPM	905	P	2	1498		0.999763	0.00554396	116.74	108.01	116.74	-0.0021811	27596000	984	37.5065	NaN	0.999763	NaN	NaN	116.74	NaN	NaN	NaN	NaN	NaN	NaN	NaN	NaN	NaN	NaN	NaN	NaN	NaN	NaN	NaN	NaN	NaN	NaN	NaN	NaN	NaN	NaN	NaN	NaN
P08572	1369	P08572	P08572	Collagen alpha-2(IV) chain;Canstatin	COL4A2	FMGNTGPTGAVGDRGPKGPKGDPGFPGAPGT	906	P	3	1498		0.999994	1.49361e-07	106.86	102.34	87.772	-0.36181	166090000	1369	52.351	0.999994	0.999686	0.999994	106.86	64.87	103.26	0	0	NaN	NaN	NaN	NaN	NaN	NaN	NaN	NaN	NaN	NaN	NaN	NaN	NaN	NaN	0.99998	47.0971	9.82635e-05	82.635	0.999994	52.0291	1.49361e-07
P08572	635	P08572	P08572	Collagen alpha-2(IV) chain;Canstatin	COL4A2	PPGLGLPGLKGQRGFPGDAGLPGPPGFLGPP	907	P	3	1498	+	0.990324	0.00302456	40.685	30.263	40.685	0.75684	8186800	635	18.7267	NaN	0.990324	NaN	NaN	40.685	NaN	NaN	NaN	NaN	NaN	NaN	NaN	NaN	NaN	NaN	NaN	NaN	NaN	NaN	NaN	NaN	NaN	NaN	NaN	NaN	NaN	NaN	NaN	NaN
P08572	641	P08572	P08572	Collagen alpha-2(IV) chain;Canstatin	COL4A2	PGLKGQRGFPGDAGLPGPPGFLGPPGPAGTP	908	P	3	1498	+	0.77316	0.00302456	40.685	30.263	40.685	0.75684	8186800	641	3.90043	NaN	0.77316	NaN	NaN	40.685	NaN	NaN	NaN	NaN	NaN	NaN	NaN	NaN	NaN	NaN	NaN	NaN	NaN	NaN	NaN	NaN	NaN	NaN	NaN	NaN	NaN	NaN	NaN	NaN
P08572	644	P08572	P08572	Collagen alpha-2(IV) chain;Canstatin	COL4A2	KGQRGFPGDAGLPGPPGFLGPPGPAGTPGQI	909	P	3	1498	+	0.699044	0.00302456	40.685	30.263	40.685	0.75684	8186800	644	4.01179	NaN	0.699044	NaN	NaN	40.685	NaN	NaN	NaN	NaN	NaN	NaN	NaN	NaN	NaN	NaN	NaN	NaN	NaN	NaN	NaN	NaN	NaN	NaN	NaN	NaN	NaN	NaN	NaN	NaN
P08572	649	P08572	P08572	Collagen alpha-2(IV) chain;Canstatin	COL4A2	FPGDAGLPGPPGFLGPPGPAGTPGQIDCDTD	910	P	3	1498	+	0.479608	0.00302456	40.685	30.263	40.685	0.75684	0	649	0	NaN	0.479608	NaN	NaN	40.685	NaN	NaN	NaN	NaN	NaN	NaN	NaN	NaN	NaN	NaN	NaN	NaN	NaN	NaN	NaN	NaN	NaN	NaN	NaN	NaN	NaN	NaN	NaN	NaN
P08572	650	P08572	P08572	Collagen alpha-2(IV) chain;Canstatin	COL4A2	PGDAGLPGPPGFLGPPGPAGTPGQIDCDTDV	911	P	3	1498	+	0.479608	0.00302456	40.685	30.263	40.685	0.75684	0	650	0	NaN	0.479608	NaN	NaN	40.685	NaN	NaN	NaN	NaN	NaN	NaN	NaN	NaN	NaN	NaN	NaN	NaN	NaN	NaN	NaN	NaN	NaN	NaN	NaN	NaN	NaN	NaN	NaN	NaN
P08572	656	P08572	P08572	Collagen alpha-2(IV) chain;Canstatin	COL4A2	PGPPGFLGPPGPAGTPGQIDCDTDVKRAVGG	912	P	3	1498	+	0.717517	0.00302456	40.685	30.263	40.685	0.75684	8186800	656	3.90043	NaN	0.717517	NaN	NaN	40.685	NaN	NaN	NaN	NaN	NaN	NaN	NaN	NaN	NaN	NaN	NaN	NaN	NaN	NaN	NaN	NaN	NaN	NaN	NaN	NaN	NaN	NaN	NaN	NaN
P08572	1470	P08572	P08572	Collagen alpha-2(IV) chain;Canstatin	COL4A2	EGPIGHQGPIGQEGAPGRPGSPGLPGMPGRS	913	P	5	1498		0.350556	5.04782e-08	60.955	53.276	49.366	4.4007	0	1470	0	0.348742	0.350556	NaN	48.931	60.955	NaN	0.348742	0	0.000172199	48.931	NaN	NaN	NaN	NaN	NaN	NaN	NaN	NaN	NaN	NaN	NaN	NaN	NaN	NaN	NaN	NaN	NaN	NaN	NaN
P08572	1473	P08572	P08572	Collagen alpha-2(IV) chain;Canstatin	COL4A2	IGHQGPIGQEGAPGRPGSPGLPGMPGRSVSI	914	P	5	1498		0.350556	5.04782e-08	60.955	53.276	49.366	4.4007	0	1473	0	0.348742	0.350556	NaN	48.931	60.955	NaN	0.348742	0	0.000172199	48.931	NaN	NaN	NaN	NaN	NaN	NaN	NaN	NaN	NaN	NaN	NaN	NaN	NaN	NaN	NaN	NaN	NaN	NaN	NaN
P08572	1476	P08572	P08572	Collagen alpha-2(IV) chain;Canstatin	COL4A2	QGPIGQEGAPGRPGSPGLPGMPGRSVSIGYL	915	P	5	1498		0.350556	5.04782e-08	60.955	53.276	49.366	4.4007	0	1476	0	0.348742	0.350556	NaN	48.931	60.955	NaN	0.348742	0	0.000172199	48.931	NaN	NaN	NaN	NaN	NaN	NaN	NaN	NaN	NaN	NaN	NaN	NaN	NaN	NaN	NaN	NaN	NaN	NaN	NaN
P08572	1479	P08572	P08572	Collagen alpha-2(IV) chain;Canstatin	COL4A2	IGQEGAPGRPGSPGLPGMPGRSVSIGYLLVK	916	P	5	1498		0.481784	5.3688e-08	54.983	46.508	48.931	-1.2499	0	1479	0.214943	0.481784	0.472058	NaN	54.983	49.366	NaN	0.481784	0.214943	0.000172199	48.931	NaN	NaN	NaN	NaN	NaN	NaN	NaN	NaN	0.452218	4.80451	5.3688e-08	54.983	NaN	NaN	NaN	NaN	NaN	NaN	NaN
P08572	1482	P08572	P08572	Collagen alpha-2(IV) chain;Canstatin	COL4A2	EGAPGRPGSPGLPGMPGRSVSIGYLLVKHSQ	917	P	5	1498		0.206584	0.000596047	48.07	40.11	48.07	2.3937	0	1482	0	0.206584	NaN	NaN	48.07	NaN	NaN	0.206584	0	0.000596047	48.07	NaN	NaN	NaN	NaN	NaN	NaN	NaN	NaN	NaN	NaN	NaN	NaN	NaN	NaN	NaN	NaN	NaN	NaN	NaN
P08572	707	P08572	P08572	Collagen alpha-2(IV) chain;Canstatin	COL4A2	PGPPGPTGAKGLRGIPGFAGADGGPGPRGLP	918	P	2	1498	+	1	0.0200287	84.479	64.349	84.479	0.4089	76755000	707	71.0452	1	NaN	1	84.479	NaN	74.76	1	71.0452	0.038308	84.479	1	66.2469	0.0200287	74.76	NaN	NaN	NaN	NaN	NaN	NaN	NaN	NaN	NaN	NaN	NaN	NaN	NaN	NaN	NaN
P08572	716	P08572	P08572	Collagen alpha-2(IV) chain;Canstatin	COL4A2	KGLRGIPGFAGADGGPGPRGLPGDAGREGFP	919	P	2	1498	+	0.5	0.0200287	74.76	57.846	74.76	1.1687	22154000	716	0	NaN	NaN	0.5	NaN	NaN	74.76	NaN	NaN	NaN	NaN	NaN	NaN	NaN	NaN	NaN	NaN	NaN	NaN	NaN	NaN	NaN	NaN	NaN	NaN	NaN	NaN	NaN	NaN	NaN
P08572	718	P08572	P08572	Collagen alpha-2(IV) chain;Canstatin	COL4A2	LRGIPGFAGADGGPGPRGLPGDAGREGFPGP	920	P	2	1498	+	0.643222	0.0200287	84.479	64.349	84.479	0.4089	76755000	718	2.55964	0.643222	NaN	0.5	84.479	NaN	74.76	0.643222	2.55964	0.038308	84.479	0.552314	0.91212	0.0200287	74.76	NaN	NaN	NaN	NaN	NaN	NaN	NaN	NaN	NaN	NaN	NaN	NaN	NaN	NaN	NaN
P08572	722	P08572	P08572	Collagen alpha-2(IV) chain;Canstatin	COL4A2	PGFAGADGGPGPRGLPGDAGREGFPGPPGFI	921	P	3	1498	+	0.999983	0.0144662	63.69	47.391	63.69	-1.6185	0	722	46.8881	NaN	0	0.999983	NaN	NaN	63.69	NaN	NaN	NaN	NaN	NaN	NaN	NaN	NaN	NaN	NaN	NaN	NaN	NaN	NaN	NaN	NaN	NaN	NaN	NaN	NaN	NaN	NaN	NaN
P08572	731	P08572	P08572	Collagen alpha-2(IV) chain;Canstatin	COL4A2	PGPRGLPGDAGREGFPGPPGFIGPRGSKGAV	922	P	3	1498	+	0.976442	0.0144662	63.69	47.391	63.69	-1.6185	0	731	15.8824	NaN	0	0.976442	NaN	NaN	63.69	NaN	NaN	NaN	NaN	NaN	NaN	NaN	NaN	NaN	NaN	NaN	NaN	NaN	NaN	NaN	NaN	NaN	NaN	NaN	NaN	NaN	NaN	NaN
P08572	734	P08572	P08572	Collagen alpha-2(IV) chain;Canstatin	COL4A2	RGLPGDAGREGFPGPPGFIGPRGSKGAVGLP	923	P	3	1498	+	0.972827	4.6067e-05	92.492	77.07	92.492	-0.04023	114500000	734	16.4653	NaN	0.972827	0.732203	NaN	92.492	63.69	NaN	NaN	NaN	NaN	NaN	NaN	NaN	NaN	NaN	NaN	NaN	NaN	NaN	NaN	NaN	NaN	NaN	NaN	NaN	NaN	NaN	NaN	NaN
P08572	773	P08572	P08572	Collagen alpha-2(IV) chain;Canstatin	COL4A2	IGLPGPDGPPGERGLPGEVLGAQPGPRGDAG	924	P	2	1498	+	1	0.00814331	119.34	91.127	119.34	0.9921	142740000	773	107.604	1	NaN	1	113.44	NaN	119.34	NaN	NaN	NaN	NaN	NaN	NaN	NaN	NaN	1	98.9842	0.0104973	113.44	NaN	NaN	NaN	NaN	NaN	NaN	NaN	NaN	NaN	NaN	NaN
P08572	781	P08572	P08572	Collagen alpha-2(IV) chain;Canstatin	COL4A2	PPGERGLPGEVLGAQPGPRGDAGVPGQPGLK	925	P	2	1498	+	0.971998	0.00814331	119.34	91.127	113.44	0.83034	142740000	781	15.4047	0.971998	NaN	0.795163	113.44	NaN	119.34	NaN	NaN	NaN	NaN	NaN	NaN	NaN	NaN	0.971998	15.4047	0.0104973	113.44	NaN	NaN	NaN	NaN	NaN	NaN	NaN	NaN	NaN	NaN	NaN
P08572	63	P08572	P08572	Collagen alpha-2(IV) chain;Canstatin	COL4A2	SGGCQCYPEKGGRGQPGPVGPQGYNGPPGLQ	926	P	3	1498		0.528723	0.000389473	70.994	57.936	56.453	1.0411	14721000	63	0.607033	0.468454	NaN	0.528723	56.625	NaN	70.994	0.468454	0	0.00223314	56.625	NaN	NaN	NaN	NaN	NaN	NaN	NaN	NaN	NaN	NaN	NaN	NaN	NaN	NaN	NaN	NaN	NaN	NaN	NaN
P08572	65	P08572	P08572	Collagen alpha-2(IV) chain;Canstatin	COL4A2	GCQCYPEKGGRGQPGPVGPQGYNGPPGLQGF	927	P	3	1498	+	0.468454	0.00223314	56.625	48.337	56.625	1.7569	0	65	0	0.468454	NaN	NaN	56.625	NaN	NaN	0.468454	0	0.00223314	56.625	NaN	NaN	NaN	NaN	NaN	NaN	NaN	NaN	NaN	NaN	NaN	NaN	NaN	NaN	NaN	NaN	NaN	NaN	NaN
P08572	74	P08572	P08572	Collagen alpha-2(IV) chain;Canstatin	COL4A2	GRGQPGPVGPQGYNGPPGLQGFPGLQGRKGD	928	P	3	1498	+	0.998514	0.000389473	70.994	57.936	70.994	2.042	25751000	74	28.5394	0.964255	NaN	0.998514	56.625	NaN	70.994	0.964255	14.5186	0.00223314	56.625	NaN	NaN	NaN	NaN	NaN	NaN	NaN	NaN	NaN	NaN	NaN	NaN	NaN	NaN	NaN	NaN	NaN	NaN	NaN
P08572	75	P08572	P08572	Collagen alpha-2(IV) chain;Canstatin	COL4A2	RGQPGPVGPQGYNGPPGLQGFPGLQGRKGDK	929	P	3	1498	+	0.999678	0.000389473	70.994	57.936	70.994	2.042	33710000	75	35.3651	0.991798	NaN	0.999678	56.625	NaN	70.994	0.991798	21.3046	0.00223314	56.625	NaN	NaN	NaN	NaN	NaN	NaN	NaN	NaN	NaN	NaN	NaN	NaN	NaN	NaN	NaN	NaN	NaN	NaN	NaN
P08572	81	P08572	P08572	Collagen alpha-2(IV) chain;Canstatin	COL4A2	VGPQGYNGPPGLQGFPGLQGRKGDKGERGAP	930	P	3	1498	+	0.999999	0.000389473	70.994	57.936	70.994	2.042	33710000	81	60.0902	0.999989	NaN	0.999999	56.625	NaN	70.994	0.999989	51.8656	0.00223314	56.625	NaN	NaN	NaN	NaN	NaN	NaN	NaN	NaN	NaN	NaN	NaN	NaN	NaN	NaN	NaN	NaN	NaN	NaN	NaN
P08572	114	P08572	P08572	Collagen alpha-2(IV) chain;Canstatin	COL4A2	TGPKGDVGARGVSGFPGADGIPGHPGQGGPR	931	P	3	1498	+	1	8.80927e-06	89.507	76.946	88.471	1.2155	615630000	114	69.4324	1	0.999963	0.999999	89.507	67.251	86.539	1	65.0904	7.24004e-05	81.807	1	69.4324	8.80927e-06	88.471	0.999999	59.8692	5.59013e-05	89.507	NaN	NaN	NaN	NaN	NaN	NaN	NaN	NaN	NaN	NaN	NaN
P08572	120	P08572	P08572	Collagen alpha-2(IV) chain;Canstatin	COL4A2	VGARGVSGFPGADGIPGHPGQGGPRGRPGYD	932	P	2	1498		0.999938	8.80927e-06	89.507	76.946	89.507	0.1031	615630000	120	41.975	0.999938	0.970839	0.99967	89.507	67.251	86.539	0.999334	31.581	7.24004e-05	81.807	0.999591	32.4157	8.80927e-06	88.471	0.999938	41.975	5.59013e-05	89.507	NaN	NaN	NaN	NaN	NaN	NaN	NaN	NaN	NaN	NaN	NaN
P08572	123	P08572	P08572	Collagen alpha-2(IV) chain;Canstatin	COL4A2	RGVSGFPGADGIPGHPGQGGPRGRPGYDGCN	933	P	2	1498		0.998667	8.80927e-06	89.507	76.946	59.227	4.4847	342730000	123	28.7433	0.984376	0.52273	0.998667	89.507	41.397	74.325	0.958558	13.6388	7.24004e-05	81.807	0.71406	3.97212	8.80927e-06	88.471	0.984376	17.9933	5.59013e-05	89.507	NaN	NaN	NaN	NaN	NaN	NaN	NaN	NaN	NaN	NaN	NaN
P08572	128	P08572	P08572	Collagen alpha-2(IV) chain;Canstatin	COL4A2	FPGADGIPGHPGQGGPRGRPGYDGCNGTQGD	934	P	3	1498	+	0.859958	1.13714e-05	86.539	77.375	86.539	1.3262	313000000	128	7.83132	0.551146	0.778761	0.859958	65.809	67.251	86.539	0.551146	0.318056	0.0204911	45.047	0.501009	0	0.00747961	65.809	0	0	NaN	NaN	NaN	NaN	NaN	NaN	NaN	NaN	NaN	NaN	NaN	NaN	NaN
P08572	1412	P08572	P08572	Collagen alpha-2(IV) chain;Canstatin	COL4A2	IAVQPGTVGPQGRRGPPGAPGEMGPQGPPGE	935	P	3	1498		0.664127	2.25005e-09	109.44	85.645	43.841	1.4508	156080000	1412	0	0.664127	NaN	0.539587	109.44	NaN	87.772	0.627193	0	2.39597e-06	85.35	0.664127	0	8.38699e-06	78.976	0.528567	0	2.25005e-09	109.44	0.538243	0	0.00661163	45.784	NaN	NaN	NaN	NaN	NaN	NaN	NaN
P08572	1413	P08572	P08572	Collagen alpha-2(IV) chain;Canstatin	COL4A2	AVQPGTVGPQGRRGPPGAPGEMGPQGPPGEP	936	P	3	1498		0.664127	2.25005e-09	109.44	85.645	43.841	1.4508	156080000	1413	0	0.664127	NaN	0.539587	109.44	NaN	87.772	0.627193	0	2.39597e-06	85.35	0.664127	0	8.38699e-06	78.976	0.528567	0	2.25005e-09	109.44	0.538243	0	0.00661163	45.784	NaN	NaN	NaN	NaN	NaN	NaN	NaN
P08572	1416	P08572	P08572	Collagen alpha-2(IV) chain;Canstatin	COL4A2	PGTVGPQGRRGPPGAPGEMGPQGPPGEPGFR	937	P	3	1498	+	0.977708	2.25005e-09	109.44	85.645	109.44	0.39978	156080000	1416	13.4481	0.977708	NaN	0.931766	109.44	NaN	76.733	0.745568	1.95445	2.39597e-06	85.35	0.957347	10.4242	8.38699e-06	78.976	0.977708	13.4481	2.25005e-09	109.44	0.895793	7.20158	0.00661163	45.784	NaN	NaN	NaN	NaN	NaN	NaN	NaN
P08572	1425	P08572	P08572	Collagen alpha-2(IV) chain;Canstatin	COL4A2	RGPPGAPGEMGPQGPPGEPGFRGAPGKAGPQ	938	P	3	1498	+	0.977725	2.25005e-09	109.44	85.645	76.733	0.38341	170780000	1425	16.4557	0.881226	NaN	0.977725	109.44	NaN	87.772	0.850169	8.06318	2.39597e-06	85.35	0.799394	5.98666	8.38699e-06	78.976	0.881226	8.69396	2.25005e-09	109.44	0.81765	6.85152	0.00661163	45.784	NaN	NaN	NaN	NaN	NaN	NaN	NaN
P08572	1428	P08572	P08572	Collagen alpha-2(IV) chain;Canstatin	COL4A2	PGAPGEMGPQGPPGEPGFRGAPGKAGPQGRG	939	P	3	1498	+	0.999378	2.25005e-09	109.44	85.645	109.44	0.39978	207410000	1428	31.0901	0.999378	0.950478	0.996956	109.44	67.76	87.772	0.996642	23.1594	2.39597e-06	85.35	0.999265	30.3792	8.38699e-06	78.976	0.999378	31.0901	2.25005e-09	109.44	0.990226	19.8495	0.00661163	45.784	NaN	NaN	NaN	NaN	NaN	NaN	NaN
P08574	158	P08574	P08574	Cytochrome c1, heme protein, mitochondrial	CYC1	DEAKELAAEVEVQDGPNEDGEMFMRPGKLFD	940	P	3	1499		1	1.90761e-05	99.407	99.407	87.319	-0.53361	840560000	158	87.319	0.933335	0	1	57.826	NaN	99.407	NaN	NaN	NaN	NaN	NaN	NaN	NaN	NaN	NaN	NaN	NaN	NaN	NaN	NaN	NaN	NaN	0.933335	11.4614	0.00350197	57.826	0	0	NaN
P08574	168	P08574	P08574	Cytochrome c1, heme protein, mitochondrial	CYC1	EVQDGPNEDGEMFMRPGKLFDYFPKPYPNSE	941	P	3	1499		1	7.42886e-05	87.319	87.319	87.319	-0.53361	827270000	168	87.319	0.842558	0.958733	1	54.117	54.672	87.319	NaN	NaN	NaN	NaN	NaN	NaN	NaN	NaN	NaN	NaN	NaN	NaN	NaN	NaN	NaN	NaN	NaN	NaN	NaN	NaN	0.842558	7.28478	0.00518211
P08574	221	P08574	P08574	Cytochrome c1, heme protein, mitochondrial	CYC1	GGEDYVFSLLTGYCEPPTGVSLREGLYFNPY	942	P	3	1499		0.943792	0.00335068	56.29	48.125	44.953	-0.62129	26789000	221	12.2508	0.943792	NaN	NaN	56.29	NaN	NaN	NaN	NaN	NaN	NaN	0.943792	12.2508	0.0215598	44.953	NaN	NaN	NaN	NaN	NaN	NaN	NaN	NaN	0.781609	5.53756	0.00335068	56.29	NaN	NaN	NaN
P08579	5	P08579	P08579	U2 small nuclear ribonucleoprotein B''	SNRPB2	___________MDIRPNHTIYINNMNDKIKK	943	P	4	1500		1	4.27322e-09	140.95	133.66	110.77	-0.11648	5813600000	5	110.769	1	1	1	140.95	120.92	120.31	1	140.955	4.27322e-09	140.95	1	70.1139	0.000168569	73.758	1	111.645	2.75864e-07	111.65	1	107.654	2.10199e-06	107.65	1	46.4939	0.000991693	82.482	NaN	NaN	NaN
P08621	319	P08621	P08621	U1 small nuclear ribonucleoprotein 70 kDa	SNRNP70	ERKEELRGGGGDMAEPSEAGDAPPDDGPPGE	944	P	3	1503		0.416447	1.02257e-08	66.959	65.256	66.959	-1.2087	0	319	0	0.416447	NaN	NaN	66.959	NaN	NaN	0.416447	0	1.02257e-08	66.959	NaN	NaN	NaN	NaN	NaN	NaN	NaN	NaN	NaN	NaN	NaN	NaN	NaN	NaN	NaN	NaN	NaN	NaN	NaN
P08621	326	P08621	P08621	U1 small nuclear ribonucleoprotein 70 kDa	SNRNP70	GGGGDMAEPSEAGDAPPDDGPPGELGPDGPD	945	P	3	1503		0.416447	1.02257e-08	66.959	65.256	66.959	-1.2087	0	326	0	0.416447	NaN	NaN	66.959	NaN	NaN	0.416447	0	1.02257e-08	66.959	NaN	NaN	NaN	NaN	NaN	NaN	NaN	NaN	NaN	NaN	NaN	NaN	NaN	NaN	NaN	NaN	NaN	NaN	NaN
P08621	91	P08621	P08621	U1 small nuclear ribonucleoprotein 70 kDa	SNRNP70	ERRQQEVETELKMWDPHNDPNAQGDAFKTLF	946	P	5	1503		1	0.0148237	54.152	48.551	54.152	0.58995	180860000	91	54.1524	1	NaN	NaN	54.152	NaN	NaN	1	54.1524	0.0148237	54.152	NaN	NaN	NaN	NaN	NaN	NaN	NaN	NaN	NaN	NaN	NaN	NaN	NaN	NaN	NaN	NaN	NaN	NaN	NaN
P08621	95	P08621	P08621	U1 small nuclear ribonucleoprotein 70 kDa	SNRNP70	QEVETELKMWDPHNDPNAQGDAFKTLFVARV	947	P	5	1503		1	0.0266872	54.152	48.551	54.152	0.58995	162380000	95	54.1524	1	NaN	NaN	54.152	NaN	NaN	1	54.1524	0.0266872	54.152	NaN	NaN	NaN	NaN	NaN	NaN	NaN	NaN	NaN	NaN	NaN	NaN	NaN	NaN	NaN	NaN	NaN	NaN	NaN
P08708	100	P08708	P08708	40S ribosomal protein S17	RPS17	VPEVSALDQEIIEVDPDTKEMLKLLDFGSLS	948	P	4	1507	+	1	0.000156486	88.122	82.578	88.122	-0.43351	1322900000	100	77.3171	1	NaN	NaN	88.122	NaN	NaN	1	71.9736	0.000160647	84.035	1	77.3171	0.000156486	88.122	0.996428	24.4554	0.0434522	49.287	0.999996	54.0677	0.00576033	65.071	NaN	NaN	NaN	NaN	NaN	NaN	NaN
P08708	122	P08708	P08708	40S ribosomal protein S17	RPS17	KLLDFGSLSNLQVTQPTVGMNFKTPRGPV__	949	P	3	1507		1	1.55327e-07	102.39	88.536	102.39	2.2835	55943000	122	102.39	1	NaN	NaN	102.39	NaN	NaN	NaN	NaN	NaN	NaN	1	102.39	1.55327e-07	102.39	NaN	NaN	NaN	NaN	NaN	NaN	NaN	NaN	NaN	NaN	NaN	NaN	NaN	NaN	NaN
P08842	428	P08842	P08842	Steryl-sulfatase	STS	APLPEDRIIDGRDLMPLLEGKSQRSDHEFLF	950	P	4	1511		0.913396	0.00960898	50.215	38.429	50.215	0.1871	133280000	428	10.4476	0.913396	NaN	NaN	50.215	NaN	NaN	NaN	NaN	NaN	NaN	NaN	NaN	NaN	NaN	0.913396	10.4476	0.00960898	50.215	NaN	NaN	NaN	NaN	NaN	NaN	NaN	NaN	NaN	NaN	NaN
P08865;A0A8I5KQE6	194;194	P08865	P08865	40S ribosomal protein SA	RPSA	AREVLRMRGTISREHPWEVMPDLYFYRDPEE	951	P	4	1512		0.999998	1.5702e-12	139.93	133.85	139.93	-0.4864	3000900000	194	56.4638	0.999902	0.999998	0.997861	73.107	139.93	54.311	0.996753	24.8633	0.00589574	52.669	0.999902	40.0962	0.0004841	68.461	0.999366	31.9741	0.000127689	73.107	NaN	NaN	NaN	NaN	NaN	NaN	NaN	NaN	NaN	NaN	NaN
P08865;A0A8I5KQE6	199;199	P08865	P08865	40S ribosomal protein SA	RPSA	RMRGTISREHPWEVMPDLYFYRDPEEIEKEE	952	P	4	1512		0.999997	1.5702e-12	139.93	133.85	139.93	-0.4864	2947100000	199	55.7621	0.999902	0.999997	0.997861	73.107	139.93	54.311	0.998216	27.463	0.00589574	52.669	0.999902	40.0962	0.0004841	68.461	0.999366	31.9741	0.000127689	73.107	NaN	NaN	NaN	NaN	NaN	NaN	NaN	NaN	NaN	NaN	NaN
P08865;A0A8I5KQE6	143;143	P08865	P08865	40S ribosomal protein SA	RPSA	RADHQPLTEASYVNLPTIALCNTDSPLRYVD	953	P	4	1512		0.999781	5.08709e-09	87.25	81.733	87.25	-1.263	181440000	143	36.6666	0.999781	0.999543	0.998211	87.25	77.733	57.076	0.992336	21.129	2.64531e-06	78.909	NaN	NaN	NaN	NaN	NaN	NaN	NaN	NaN	0.997709	26.5962	8.38797e-08	67.396	0.980794	17.0915	8.96987e-08	73.771	0.999781	36.6666	8.17366e-06
P09001	84	P09001	P09001	39S ribosomal protein L3, mitochondrial	MRPL3	DKAQLASKLCPLKDEPWPIHPWEPGSFRVGL	954	P	4	1515		0.995909	0.0162303	73.783	66.265	73.21	1.0463	41363000	84	24.1214	NaN	0.995909	NaN	NaN	73.783	NaN	NaN	NaN	NaN	NaN	NaN	NaN	NaN	NaN	NaN	NaN	NaN	NaN	NaN	NaN	NaN	NaN	NaN	NaN	NaN	NaN	NaN	NaN	NaN
P09001	86	P09001	P09001	39S ribosomal protein L3, mitochondrial	MRPL3	AQLASKLCPLKDEPWPIHPWEPGSFRVGLIA	955	P	4	1515		0.995445	0.0162303	73.783	66.265	73.21	1.0463	41363000	86	24.1214	NaN	0.995445	NaN	NaN	73.783	NaN	NaN	NaN	NaN	NaN	NaN	NaN	NaN	NaN	NaN	NaN	NaN	NaN	NaN	NaN	NaN	NaN	NaN	NaN	NaN	NaN	NaN	NaN	NaN
P09012	142	P09012	P09012	U1 small nuclear ribonucleoprotein A	SNRPA	GGGATPVVGAVQGPVPGMPPMTQAPRIMHHM	956	P	3	1516		0.911184	3.96317e-26	158.45	158.45	97.639	0.61018	2373600000	142	12.9979	0.844461	0.911184	0.751639	158.45	102.03	67.69	0.673131	5.26461	8.10879e-06	75.275	0.844461	8.97329	3.96317e-26	158.45	0.691383	5.72726	0.000715943	56.021	0.753165	6.78772	9.78827e-05	85.19	0	0	NaN	NaN	NaN	NaN	NaN
P09012	145	P09012	P09012	U1 small nuclear ribonucleoprotein A	SNRPA	ATPVVGAVQGPVPGMPPMTQAPRIMHHMPGQ	957	P	2	1516		0.67386	3.96317e-26	158.45	158.45	158.45	0.10371	697880000	145	3.20373	0.67386	0.556562	0.546465	158.45	76.162	67.283	0.433506	0.42923	0.0154536	40.328	0.67386	3.20373	3.96317e-26	158.45	NaN	NaN	NaN	NaN	0.551727	0.940309	0.000771742	61.112	0	0	NaN	NaN	NaN	NaN	NaN
P09012	146	P09012	P09012	U1 small nuclear ribonucleoprotein A	SNRPA	TPVVGAVQGPVPGMPPMTQAPRIMHHMPGQP	958	P	3	1516		0.881366	1.845e-05	102.03	102.03	74.525	-0.12327	1506400000	146	11.2339	0.822816	0.881366	0.875437	90.454	102.03	67.69	0.822816	6.64467	2.94186e-05	90.454	0.795421	5.45544	8.59836e-05	76.573	0.764378	5.72726	0.000715943	56.021	0.809943	6.35494	1.90734e-05	85.19	0	0	NaN	NaN	NaN	NaN	NaN
P09012	151	P09012	P09012	U1 small nuclear ribonucleoprotein A	SNRPA	AVQGPVPGMPPMTQAPRIMHHMPGQPPYMPP	959	P	3	1516		0.534591	6.71586e-05	66.98	60.753	66.98	-0.91244	64871000	151	0.952477	0.534591	0	0.425787	66.98	NaN	48.634	NaN	NaN	NaN	NaN	0	0	NaN	NaN	0.534591	0.952477	6.71586e-05	66.98	NaN	NaN	NaN	NaN	0	0	NaN	NaN	0.471584	2.11962	0.000582894
P09104	18	P09104	P09104	Gamma-enolase	ENO2	IEKIWAREILDSRGNPTVEVDLYTAKGLFRA	960	P	2	1520		1	5.76756e-05	104.17	88.227	87.18	-3.4631	0	18	87.1795	1	1	1	68.034	87.18	104.17	1	68.034	0.0191293	68.034	NaN	NaN	NaN	NaN	NaN	NaN	NaN	NaN	NaN	NaN	NaN	NaN	NaN	NaN	NaN	NaN	NaN	NaN	NaN
P09110	250	P09110	P09110	3-ketoacyl-CoA thiolase, peroxisomal	ACAA1	GTKRSITVTQDEGIRPSTTMEGLAKLKPAFK	961	P	3	1521		1	2.21953e-12	147.16	102.58	84.919	0.44264	1260600000	250	84.9192	1	1	1	104.84	147.16	63.184	1	79.4666	6.3385e-05	79.467	NaN	NaN	NaN	NaN	1	104.837	1.20991e-06	104.84	1	84.1066	0.000399032	84.107	1	101.285	2.45615e-07	101.29	1	79.7831	0.000159986
P09110	313	P09110	P09110	3-ketoacyl-CoA thiolase, peroxisomal	ACAA1	LPILGVLRSYAVVGVPPDIMGIGPAYAIPVA	962	P	3	1521		0.537767	0.000873335	64.028	57.96	64.028	-0.15093	30750000	313	0.90554	NaN	0.537767	NaN	NaN	64.028	NaN	NaN	NaN	NaN	NaN	NaN	NaN	NaN	NaN	NaN	NaN	NaN	NaN	NaN	NaN	NaN	NaN	NaN	NaN	NaN	NaN	NaN	NaN	NaN
P09211	2	P09211	P09211	Glutathione S-transferase P	GSTP1	______________MPPYTVVYFPVRGRCAA	963	P	2	1523		0.998361	0.0322569	102.53	85.86	102.53	0.7414	43941000	2	27.8469	0.998361	0.998265	NaN	102.53	101.32	NaN	NaN	NaN	NaN	NaN	NaN	NaN	NaN	NaN	0.998361	27.8469	0.0322569	102.53	NaN	NaN	NaN	NaN	NaN	NaN	NaN	NaN	NaN	NaN	NaN
P09543	311	P09543	P09543	2',3'-cyclic-nucleotide 3'-phosphodiesterase	CNP	TGARVELSEQQLQLWPSDVDKLSPTDNLPRG	964	P	2	1534		0.997206	4.45026e-22	150.39	124.24	84.874	-1.5317	148640000	311	25.6124	0.849337	0.997206	0.989332	78.202	105.32	150.39	NaN	NaN	NaN	NaN	NaN	NaN	NaN	NaN	0.849337	6.66267	0.0018511	78.202	0.804891	5.86544	0.00220143	76.21	NaN	NaN	NaN	NaN	NaN	NaN	NaN
P09543	319	P09543	P09543	2',3'-cyclic-nucleotide 3'-phosphodiesterase	CNP	EQQLQLWPSDVDKLSPTDNLPRGSRAHITLG	965	P	3	1534		0.948154	0.00041009	105.32	86.072	76.21	0.53507	148640000	319	11.621	0.948154	0.944603	NaN	78.202	105.32	NaN	0.895941	6.69186	0.0700549	48.115	NaN	NaN	NaN	NaN	0.849337	6.66267	0.0018511	78.202	0.948154	11.621	0.00220143	76.21	NaN	NaN	NaN	NaN	NaN	NaN	NaN
P09622	360	P09622	P09622	Dihydrolipoyl dehydrogenase, mitochondrial	DLD	TKIPNIYAIGDVVAGPMLAHKAEDEGIICVE	966	P	2	1536		1	0.000115569	112.42	85.418	112.42	0.6626	4881300000	360	99.0098	1	1	1	77.506	112.42	78.501	0.999923	41.1576	0.0751444	42.716	1	73.8671	0.00105964	77.506	NaN	NaN	NaN	NaN	NaN	NaN	NaN	NaN	1	66.157	0.00194399	71.685	0.999998	56.6747	0.00443693
P09622	213	P09622	P09622	Dihydrolipoyl dehydrogenase, mitochondrial	DLD	DTIVSSTGALSLKKVPEKMVVIGAGVIGVEL	967	P	4	1536		1	0.00147535	62.677	56.609	62.677	0.23137	62142000	213	62.6771	1	1	NaN	40.145	62.677	NaN	NaN	NaN	NaN	NaN	1	40.1452	0.049702	40.145	NaN	NaN	NaN	NaN	NaN	NaN	NaN	NaN	NaN	NaN	NaN	NaN	NaN	NaN	NaN
P09622	458	P09622	P09622	Dihydrolipoyl dehydrogenase, mitochondrial	DLD	GQKSTDRVLGAHILGPGAGEMVNEAALALEY	968	P	3	1536		1	9.18846e-22	150.95	144.29	83.557	0.12997	438480000	458	83.5571	NaN	1	1	NaN	40.544	150.95	NaN	NaN	NaN	NaN	NaN	NaN	NaN	NaN	NaN	NaN	NaN	NaN	NaN	NaN	NaN	NaN	NaN	NaN	NaN	NaN	NaN	NaN	NaN
P09651	49	P09651	P09651	Heterogeneous nuclear ribonucleoprotein A1;Heterogeneous nuclear ribonucleoprotein A1, N-terminally processed	HNRNPA1	FEQWGTLTDCVVMRDPNTKRSRGFGFVTYAT	969	P	4	1539		1	0.00347541	51.834	39.28	51.834	-2.2904	129660000	49	51.834	NaN	NaN	1	NaN	NaN	51.834	NaN	NaN	NaN	NaN	NaN	NaN	NaN	NaN	NaN	NaN	NaN	NaN	NaN	NaN	NaN	NaN	NaN	NaN	NaN	NaN	NaN	NaN	NaN
P09874	389	P09874	P09874	Poly [ADP-ribose] polymerase 1	PARP1	ASAPAAVNSSASADKPLSNMKILTLGKLSRN	970	P	5	1544		0.999964	8.31963e-11	85.864	81.887	84.369	1.0729	3502100000	389	44.4275	0.999964	0.999739	0.999831	84.369	85.864	74.03	0.999964	44.4275	8.31963e-11	84.369	NaN	NaN	NaN	NaN	0.998508	28.7142	1.66803e-08	62.547	0.99577	23.8351	6.20984e-10	67.279	NaN	NaN	NaN	NaN	NaN	NaN	NaN
P09874	149	P09874	P09874	Poly [ADP-ribose] polymerase 1	PARP1	KGQVRLSKKMVDPEKPQLGMIDRWYHPGCFV	971	P	2	1544		0.999662	0.00850024	77.305	77.305	77.305	-0.0011042	607890000	149	35.264	0.871535	0.995799	0.999662	44.105	49.515	77.305	NaN	NaN	NaN	NaN	0.871535	9.69984	0.0581896	44.105	NaN	NaN	NaN	NaN	NaN	NaN	NaN	NaN	NaN	NaN	NaN	NaN	NaN	NaN	NaN
P09874	42	P09874	P09874	Poly [ADP-ribose] polymerase 1	PARP1	SIPKDSLRMAIMVQSPMFDGKVPHWYHFSCF	972	P	2	1544		1	0.000142954	146.11	140.26	46.462	-1.1629	632800000	42	46.4619	1	1	1	111.06	146.11	112.11	1	111.057	0.0421824	111.06	NaN	NaN	NaN	NaN	NaN	NaN	NaN	NaN	NaN	NaN	NaN	NaN	NaN	NaN	NaN	NaN	1	46.4619	0.067026
P09874	160	P09874	P09874	Poly [ADP-ribose] polymerase 1	PARP1	DPEKPQLGMIDRWYHPGCFVKNREELGFRPE	973	P	4	1544		0.978247	0.00203921	56.055	49.257	46.353	0.040844	36718000	160	16.5106	NaN	0.978247	0.938825	NaN	46.353	56.055	NaN	NaN	NaN	NaN	NaN	NaN	NaN	NaN	NaN	NaN	NaN	NaN	NaN	NaN	NaN	NaN	NaN	NaN	NaN	NaN	NaN	NaN	NaN
P09874	915	P09874	P09874	Poly [ADP-ribose] polymerase 1	PARP1	MVSKSANYCHTSQGDPIGLILLGEVALGNMY	974	P	3	1544		1	0.000870987	49.888	44.047	49.888	0.75051	12095000	915	49.8878	1	NaN	NaN	49.888	NaN	NaN	NaN	NaN	NaN	NaN	NaN	NaN	NaN	NaN	NaN	NaN	NaN	NaN	NaN	NaN	NaN	NaN	NaN	NaN	NaN	NaN	1	49.8878	0.000870987
P09874	480	P09874	P09874	Poly [ADP-ribose] polymerase 1	PARP1	STKSLQELFLAHILSPWGAEVKAEPVEVVAP	975	P	3	1544		1	2.58133e-49	183.47	178.49	96.718	-0.52307	4931300000	480	96.718	0.999545	1	1	166.35	183.47	147.41	0.999545	33.4185	2.60394e-27	162.91	0.998758	29.0353	0.00172227	94.802	0.99896	29.8209	1.52454e-27	166.35	NaN	NaN	NaN	NaN	NaN	NaN	NaN	NaN	NaN	NaN	NaN
P09874	489	P09874	P09874	Poly [ADP-ribose] polymerase 1	PARP1	LAHILSPWGAEVKAEPVEVVAPRGKSGAALS	976	P	4	1544		0.999847	2.58133e-49	183.47	178.49	140.71	0.53273	4703000000	489	38.1399	0.999545	0.999571	0.999847	166.35	183.47	147.41	0.999545	33.4185	2.60394e-27	162.91	0.998094	27.1811	0.00172227	94.802	0.999273	31.3778	1.52454e-27	166.35	NaN	NaN	NaN	NaN	NaN	NaN	NaN	NaN	NaN	NaN	NaN
P09874	605	P09874	P09874	Poly [ADP-ribose] polymerase 1	PARP1	GRVGTVIGSNKLEQMPSKEDAIEHFMKLYEE	977	P	4	1544		1	6.33591e-06	108.07	96.106	51.234	-0.59754	3281000000	605	51.2336	NaN	1	1	NaN	82.885	108.07	NaN	NaN	NaN	NaN	NaN	NaN	NaN	NaN	NaN	NaN	NaN	NaN	NaN	NaN	NaN	NaN	NaN	NaN	NaN	NaN	NaN	NaN	NaN
P09884	177	P09884	P09884	DNA polymerase alpha catalytic subunit	POLA1	ILQDLNTETPQITPPPVMILKKKRSIGASPN	978	P	4	1545		0.666363	0.00220127	43.583	41.734	43.583	1.4793	60450000	177	4.47017	0.666363	NaN	NaN	43.583	NaN	NaN	NaN	NaN	NaN	NaN	0.666363	4.47017	0.00220127	43.583	NaN	NaN	NaN	NaN	NaN	NaN	NaN	NaN	NaN	NaN	NaN	NaN	NaN	NaN	NaN
P09884	904	P09884	P09884	DNA polymerase alpha catalytic subunit	POLA1	VTEDGEQEQIPELPDPSLEMGILPREIRKLV	979	P	3	1545		0.943747	0.000441377	82.157	74.491	82.157	2.7758	6921300	904	14.4666	NaN	NaN	0.943747	NaN	NaN	82.157	NaN	NaN	NaN	NaN	NaN	NaN	NaN	NaN	NaN	NaN	NaN	NaN	NaN	NaN	NaN	NaN	NaN	NaN	NaN	NaN	NaN	NaN	NaN
P09936	5	P09936	P09936	Ubiquitin carboxyl-terminal hydrolase isozyme L1	UCHL1	___________MQLKPMEINPEMLNKVLSRL	980	P	2	1546		0.999999	0.000165821	128.06	117.01	114.71	-0.23919	1096900000	5	58.989	0.999999	0.999997	0.999939	114.71	128.06	123.26	NaN	NaN	NaN	NaN	0.999999	58.989	0.0379315	114.71	NaN	NaN	NaN	NaN	NaN	NaN	NaN	NaN	NaN	NaN	NaN	NaN	NaN	NaN	NaN
P09936	10	P09936	P09936	Ubiquitin carboxyl-terminal hydrolase isozyme L1	UCHL1	______MQLKPMEINPEMLNKVLSRLGVAGQ	981	P	3	1546		0.983473	0.00143565	74.296	74.296	74.296	-0.24397	2457100000	10	19.4843	0.902587	0.954639	0.983473	58.159	65.113	74.296	NaN	NaN	NaN	NaN	NaN	NaN	NaN	NaN	0.902587	9.66872	0.0185154	58.159	NaN	NaN	NaN	NaN	NaN	NaN	NaN	NaN	NaN	NaN	NaN
P09960	598	P09960	P09960	Leukotriene A-4 hydrolase	LTA4H	DQAVRTYQEHKASMHPVTAMLVGKDLKVD__	982	P	3	1548		1	0.00167558	82.765	63.73	60.938	0.18553	295730000	598	60.9384	NaN	1	NaN	NaN	82.765	NaN	NaN	NaN	NaN	NaN	NaN	NaN	NaN	NaN	NaN	NaN	NaN	NaN	NaN	NaN	NaN	NaN	NaN	NaN	NaN	NaN	NaN	NaN	NaN
P09960	180	P09960	P09960	Leukotriene A-4 hydrolase	LTA4H	KELVALMSAIRDGETPDPEDPSRKIYKFIQK	983	P	3	1548		0.646786	1.89381e-05	74.516	69.357	74.516	1.0699	109480000	180	3.39814	0.541676	0.646786	NaN	62.858	74.516	NaN	0.524631	1.11997	1.89381e-05	62.858	NaN	NaN	NaN	NaN	0.541676	3.14593	0.0015588	58.168	NaN	NaN	NaN	NaN	NaN	NaN	NaN	NaN	NaN	NaN	NaN
P09960	13	P09960	P09960	Leukotriene A-4 hydrolase	LTA4H	___MPEIVDTCSLASPASVCRTKHLHLRCSV	984	P	2	1548		1	0.0202031	97.175	68.369	97.175	-0.39524	47140000	13	94.1371	NaN	1	NaN	NaN	97.175	NaN	NaN	NaN	NaN	NaN	NaN	NaN	NaN	NaN	NaN	NaN	NaN	NaN	NaN	NaN	NaN	NaN	NaN	NaN	NaN	NaN	NaN	NaN	NaN
P09960	121	P09960	P09960	Leukotriene A-4 hydrolase	LTA4H	SFETSPKSSALQWLTPEQTSGKEHPYLFSQC	985	P	5	1548		1	0.000561115	52.122	43.804	52.122	-1.2806	47223000	121	52.1215	1	NaN	NaN	52.122	NaN	NaN	NaN	NaN	NaN	NaN	1	52.1215	0.000561115	52.122	NaN	NaN	NaN	NaN	NaN	NaN	NaN	NaN	NaN	NaN	NaN	NaN	NaN	NaN	NaN
P09960	130	P09960	P09960	Leukotriene A-4 hydrolase	LTA4H	ALQWLTPEQTSGKEHPYLFSQCQAIHCRAIL	986	P	5	1548		1	0.000561115	52.122	43.804	52.122	-1.2806	47223000	130	52.1215	1	NaN	NaN	52.122	NaN	NaN	NaN	NaN	NaN	NaN	1	52.1215	0.000561115	52.122	NaN	NaN	NaN	NaN	NaN	NaN	NaN	NaN	NaN	NaN	NaN	NaN	NaN	NaN	NaN
Q99878;Q96KK5;P0C0S8;Q9BTM1;Q8IUE6;Q93077	49;49;49;49;49;49	Q99878;Q8IUE6;Q93077	Q99878	Histone H2A type 1-J;Histone H2A type 1-H;Histone H2A type 1;Histone H2A.J;Histone H2A type 2-B;Histone H2A type 1-C	HIST1H2AJ;HIST1H2AH;HIST1H2AG;H2AFJ;HIST2H2AB;HIST1H2AC	LLRKGNYAERVGAGAPVYLAAVLEYLTAEIL	987	P	3	1552;5423;6523		1	3.01928e-59	196.27	9.337	45.862	4.3436	133100000	49	45.8622	1	1	1	196.27	53.705	84.559	NaN	NaN	NaN	NaN	NaN	NaN	NaN	NaN	NaN	NaN	NaN	NaN	NaN	NaN	NaN	NaN	1	196.273	0	196.27	NaN	NaN	NaN
P0DJ07	43	P0DJ07	P0DJ07	Protein PET100 homolog, mitochondrial	PET100	EWFEDDVIQRKRELWPPEKLQEIEEFKERLR	988	P	4	1568		1	0.000481556	106.36	93.642	106.36	0.38853	220970000	43	106.356	1	1	NaN	77.13	106.36	NaN	NaN	NaN	NaN	NaN	1	77.1295	0.00709309	77.13	1	73.5965	0.00867218	73.597	NaN	NaN	NaN	NaN	NaN	NaN	NaN	NaN	NaN	NaN	NaN
P0DJ07	44	P0DJ07	P0DJ07	Protein PET100 homolog, mitochondrial	PET100	WFEDDVIQRKRELWPPEKLQEIEEFKERLRK	989	P	4	1568		1	0.000481556	106.36	93.642	106.36	0.38853	220970000	44	106.356	1	1	NaN	77.13	106.36	NaN	NaN	NaN	NaN	NaN	1	77.1295	0.00709309	77.13	1	73.5965	0.00867218	73.597	NaN	NaN	NaN	NaN	NaN	NaN	NaN	NaN	NaN	NaN	NaN
P0DMN0;P0DMM9;P50225	200;200;200	P0DMN0;P50225	P50225	Sulfotransferase 1A4;Sulfotransferase 1A3;Sulfotransferase 1A1	SULT1A4;SULT1A3;SULT1A1	THPVLYLFYEDMKENPKREIQKILEFVGRSL	990	P	4	1572;2577		0.999999	0.00277433	65.107	60.49	65.107	2.0327	96091000	200	60.9857	0.999999	NaN	NaN	65.107	NaN	NaN	NaN	NaN	NaN	NaN	0	0	NaN	NaN	0.999999	60.9857	0.00277433	65.107	NaN	NaN	NaN	NaN	NaN	NaN	NaN	NaN	NaN	NaN	NaN
P0DMV9;P0DMV8;P34931	116;116;118	P0DMV9;P34931	P0DMV9	Heat shock 70 kDa protein 1B;Heat shock 70 kDa protein 1A;Heat shock 70 kDa protein 1-like	HSPA1B;HSPA1A;HSPA1L	PKVLVSYKGENKAFYPEEISSMVLTKLKETA;PKVQVSYKGETKAFYPEEISSMVLTKMKEIA	991	P	2	1573;2210		1	0.00425019	91.313	74.146	68.44	-1.0136	405610000	116	68.4405	1	1	1	91.313	68.44	65.179	1	91.3133	0.00425019	91.313	NaN	NaN	NaN	NaN	0	0	NaN	NaN	NaN	NaN	NaN	NaN	NaN	NaN	NaN	NaN	NaN	NaN	NaN
P0DMV9;P0DMV8	138;138	P0DMV9	P0DMV9	Heat shock 70 kDa protein 1B;Heat shock 70 kDa protein 1A	HSPA1B;HSPA1A	VLTKMKEIAEAYLGYPVTNAVITVPAYFNDS	992	P	3	1573		0.982144	0.0102761	45.126	40.899	45.126	0.46404	3462100	138	17.404	0.982144	NaN	NaN	45.126	NaN	NaN	NaN	NaN	NaN	NaN	NaN	NaN	NaN	NaN	NaN	NaN	NaN	NaN	NaN	NaN	NaN	NaN	0.982144	17.404	0.0102761	45.126	NaN	NaN	NaN
P0DMV9;P0DMV8	605;605	P0DMV9	P0DMV9	Heat shock 70 kDa protein 1B;Heat shock 70 kDa protein 1A	HSPA1B;HSPA1A	DEFEHKRKELEQVCNPIISGLYQGAGGPGPG	993	P	2	1573		1	5.67302e-12	141.6	136.39	141.6	0.14876	23645000000	605	82.0966	1	0.999999	1	141.6	97.295	104.51	NaN	NaN	NaN	NaN	0.977112	16.3438	0.00399188	50.757	NaN	NaN	NaN	NaN	0.998024	27.4681	0.0025505	47.104	1	82.0966	5.67302e-12	141.6	0.999999	60.7211	6.24756e-06
P0DMV9;P0DMV8	617;617	P0DMV9	P0DMV9	Heat shock 70 kDa protein 1B;Heat shock 70 kDa protein 1A	HSPA1B;HSPA1A	VCNPIISGLYQGAGGPGPGGFGAQGPKGGSG	994	P	4	1573		0.496109	0.00633993	41.209	32.066	41.209	4.0425	0	617	0.0693455	0.496109	0	0	41.209	NaN	NaN	NaN	NaN	NaN	NaN	0.496109	0.0693455	0.00633993	41.209	NaN	NaN	NaN	NaN	NaN	NaN	NaN	NaN	0	0	NaN	NaN	0	0	NaN
P0DMV9;P0DMV8	465;465	P0DMV9	P0DMV9	Heat shock 70 kDa protein 1B;Heat shock 70 kDa protein 1A	HSPA1B;HSPA1A	TKDNNLLGRFELSGIPPAPRGVPQIEVTFDI	995	P	3	1573		0.284809	1.94294e-18	90.672	29.392	82.317	3.3658	0	465	0.468276	0.25	0.284809	0.25	80.923	90.672	60.527	0	0	NaN	NaN	0.25	0	3.88662e-07	63.727	0.25	0	3.18965e-12	80.923	NaN	NaN	NaN	NaN	NaN	NaN	NaN	NaN	NaN	NaN	NaN
P0DMV9;P0DMV8	466;466	P0DMV9	P0DMV9	Heat shock 70 kDa protein 1B;Heat shock 70 kDa protein 1A	HSPA1B;HSPA1A	KDNNLLGRFELSGIPPAPRGVPQIEVTFDID	996	P	3	1573		0.263435	1.94294e-18	90.672	29.392	55.3	3.9951	0	466	0.30584	0.26238	0.263435	0.253734	80.923	90.672	60.527	0	0	NaN	NaN	0.25	0	3.88662e-07	63.727	0.26238	0.229781	3.18965e-12	80.923	0.255123	0	9.07273e-07	56.773	NaN	NaN	NaN	NaN	NaN	NaN	NaN
P0DMV9;P0DMV8	468;468	P0DMV9	P0DMV9	Heat shock 70 kDa protein 1B;Heat shock 70 kDa protein 1A	HSPA1B;HSPA1A	NNLLGRFELSGIPPAPRGVPQIEVTFDIDAN	997	P	3	1573		0.41472	1.94294e-18	90.672	29.392	68.807	4.3539	0	468	0	0.255123	0.41472	0.413154	80.923	90.672	67.406	0	0	NaN	NaN	0.25	0	3.88662e-07	63.727	0.25	0	3.18965e-12	80.923	0.255123	0	9.07273e-07	56.773	NaN	NaN	NaN	NaN	NaN	NaN	NaN
P0DMV9;P0DMV8	472;472	P0DMV9	P0DMV9	Heat shock 70 kDa protein 1B;Heat shock 70 kDa protein 1A	HSPA1B;HSPA1A	GRFELSGIPPAPRGVPQIEVTFDIDANGILN	998	P	3	1573		0.41472	1.94294e-18	90.672	29.392	68.807	4.3539	0	472	0	0.255123	0.41472	0.413154	80.923	90.672	67.406	0	0	NaN	NaN	0.25	0	3.88662e-07	63.727	0.25	0	3.18965e-12	80.923	0.255123	0	9.07273e-07	56.773	NaN	NaN	NaN	NaN	NaN	NaN	NaN
P0DMV9;P0DMV8	81;81	P0DMV9	P0DMV9	Heat shock 70 kDa protein 1B;Heat shock 70 kDa protein 1A	HSPA1B;HSPA1A	TVFDAKRLIGRKFGDPVVQSDMKHWPFQVIN	999	P	5	1573		0.999991	0.000179866	85.573	68.232	64.152	-0.43954	29882000000	81	50.4216	0.999931	0.999991	0.999886	62.677	85.573	61.602	0.999931	41.6353	0.00605339	62.677	0.999915	40.7292	0.0115892	59.429	0	0	NaN	NaN	0	0	NaN	NaN	NaN	NaN	NaN	NaN	NaN	NaN	NaN
P0DMV9;P0DMV8	91;91	P0DMV9	P0DMV9	Heat shock 70 kDa protein 1B;Heat shock 70 kDa protein 1A	HSPA1B;HSPA1A	RKFGDPVVQSDMKHWPFQVINDGDKPKVQVS	1000	P	3	1573		1	1.93097e-09	128.98	122.88	74.46	-0.23416	115340000000	91	74.4602	1	1	1	125.78	128.98	122.75	0.999999	61.4529	9.56076e-06	105.61	0.999996	54.0607	0.00103009	62.611	0.999817	37.4585	2.12927e-05	85.573	0.999999	59.4752	7.89216e-09	125.78	1	53.0339	0.00450414	97.69	1	74.4602	0.00538517
P0DMV9;P0DMV8	101;101	P0DMV9	P0DMV9	Heat shock 70 kDa protein 1B;Heat shock 70 kDa protein 1A	HSPA1B;HSPA1A	DMKHWPFQVINDGDKPKVQVSYKGETKAFYP	1001	P	3	1573		0.999964	0.000153554	104.53	89.077	104.53	-0.016354	7074900000	101	44.4218	0.999552	0.999964	0.996035	67.614	104.53	59.943	0.999552	33.4888	0.00523275	67.614	0	0	NaN	NaN	0	0	NaN	NaN	0.988915	19.5041	0.0174202	58.284	0	0	NaN	NaN	0	0	NaN
P0DMV9;P0DMV8	63;63	P0DMV9	P0DMV9	Heat shock 70 kDa protein 1B;Heat shock 70 kDa protein 1A	HSPA1B;HSPA1A	ERLIGDAAKNQVALNPQNTVFDAKRLIGRKF	1002	P	3	1573		1	0.0329547	46.319	28.618	46.319	0.1412	30842000	63	46.3186	1	NaN	NaN	46.319	NaN	NaN	NaN	NaN	NaN	NaN	1	46.3186	0.0329547	46.319	NaN	NaN	NaN	NaN	NaN	NaN	NaN	NaN	NaN	NaN	NaN	NaN	NaN	NaN	NaN
P0DMV9;P0DMV8;P34931	436;436;438	P0DMV9;P34931	P0DMV9	Heat shock 70 kDa protein 1B;Heat shock 70 kDa protein 1A;Heat shock 70 kDa protein 1-like	HSPA1B;HSPA1A;HSPA1L	PTKQTQIFTTYSDNQPGVLIQVYEGERAMTK	1003	P	4	1573;2210		0.999996	1.59549e-05	62.302	57.901	62.302	0.95227	396670000	436	53.7046	NaN	NaN	0.999996	NaN	NaN	62.302	NaN	NaN	NaN	NaN	NaN	NaN	NaN	NaN	NaN	NaN	NaN	NaN	NaN	NaN	NaN	NaN	NaN	NaN	NaN	NaN	NaN	NaN	NaN
P0DMV9;P0DMV8	398;398	P0DMV9	P0DMV9	Heat shock 70 kDa protein 1B;Heat shock 70 kDa protein 1A	HSPA1B;HSPA1A	DKSENVQDLLLLDVAPLSLGLETAGGVMTAL	1004	P	3	1573		1	1.62617e-05	68.96	66.766	43.921	1.8581	127160000	398	43.9214	1	1	NaN	43.921	68.96	NaN	NaN	NaN	NaN	NaN	NaN	NaN	NaN	NaN	1	43.9214	0.0708107	43.921	NaN	NaN	NaN	NaN	NaN	NaN	NaN	NaN	NaN	NaN	NaN
P0DMV9;P0DMV8;P34931	365;365;367	P0DMV9;P34931	P0DMV9	Heat shock 70 kDa protein 1B;Heat shock 70 kDa protein 1A;Heat shock 70 kDa protein 1-like	HSPA1B;HSPA1A;HSPA1L	LQDFFNGRDLNKSINPDEAVAYGAAVQAAIL;LQDYFNGRDLNKSINPDEAVAYGAAVQAAIL	1005	P	3	1573;2210		1	0.0128671	66.871	58.782	66.871	1.993	1554200	365	66.871	NaN	NaN	1	NaN	NaN	66.871	NaN	NaN	NaN	NaN	NaN	NaN	NaN	NaN	NaN	NaN	NaN	NaN	NaN	NaN	NaN	NaN	NaN	NaN	NaN	NaN	NaN	NaN	NaN
P0DMV9;P0DMV8;P11142;P34931;P54652	39;39;39;41;40	P0DMV9;P11142;P34931;P54652	P0DMV9	Heat shock 70 kDa protein 1B;Heat shock 70 kDa protein 1A;Heat shock cognate 71 kDa protein;Heat shock 70 kDa protein 1-like;Heat shock-related 70 kDa protein 2	HSPA1B;HSPA1A;HSPA8;HSPA1L;HSPA2	GKVEIIANDQGNRTTPSYVAFTDTERLIGDA	1006	P	3	1573;1619;2210;2773		1	0.0133326	67.43	55.784	64.203	-0.035506	346440000	39	64.203	1	1	1	67.312	67.43	64.203	1	66.325	0.0145678	66.325	1	55.5879	0.0601294	55.588	1	65.2497	0.0157695	65.25	1	67.312	0.0134648	67.312	NaN	NaN	NaN	NaN	NaN	NaN	NaN
P0DP25;P0DP24;P0DP23	44;44;44	P0DP25	P0DP25			TTKELGTVMRSLGQNPTEAELQDMINEVDAD	1007	P	3	1575		1	6.46626e-08	112.2	104.14	112.2	-0.34069	243490000	44	65.441	NaN	1	0.965694	NaN	112.2	59.436	NaN	NaN	NaN	NaN	NaN	NaN	NaN	NaN	NaN	NaN	NaN	NaN	NaN	NaN	NaN	NaN	NaN	NaN	NaN	NaN	NaN	NaN	NaN
P0DP25;P0DP24;P0DP23	67;67;67	P0DP25	P0DP25			MINEVDADGNGTIDFPEFLTMMARKMKDTDS	1008	P	3	1575		0.999998	4.76288e-09	115.18	110.65	115.18	-1.3347	526520000	67	57.0211	NaN	0.999998	0.999974	NaN	115.18	50.253	NaN	NaN	NaN	NaN	NaN	NaN	NaN	NaN	NaN	NaN	NaN	NaN	NaN	NaN	NaN	NaN	NaN	NaN	NaN	NaN	NaN	NaN	NaN
P10155	10	P10155	P10155	60 kDa SS-A/Ro ribonucleoprotein	TROVE2	______MEESVNQMQPLNEKQIANSQDGYVW	1009	P	2	1588		1	0.0065517	50.452	40.222	50.452	3.6564	0	10	50.4517	NaN	1	NaN	NaN	50.452	NaN	NaN	NaN	NaN	NaN	NaN	NaN	NaN	NaN	NaN	NaN	NaN	NaN	NaN	NaN	NaN	NaN	NaN	NaN	NaN	NaN	NaN	NaN	NaN
P10253	690	P10253	P10253	Lysosomal alpha-glucosidase;76 kDa lysosomal alpha-glucosidase;70 kDa lysosomal alpha-glucosidase	GAA	NSLLSLPQEPYSFSEPAQQAMRKALTLRYAL	1010	P	4	1591		0.999865	8.15902e-46	202.13	186.01	85.573	0.19142	102790000	690	38.7345	0.999615	0.985548	0.999865	202.13	134.21	142.85	0.997977	27.1779	0.000209175	88.168	NaN	NaN	NaN	NaN	0.999615	34.1465	1.4013e-45	202.13	NaN	NaN	NaN	NaN	NaN	NaN	NaN	NaN	0.916264	10.8403	0.00358114
P10253	669	P10253	P10253	Lysosomal alpha-glucosidase;76 kDa lysosomal alpha-glucosidase;70 kDa lysosomal alpha-glucosidase	GAA	SEELCVRWTQLGAFYPFMRNHNSLLSLPQEP	1011	P	2	1591		1	0.0104163	140.45	125.88	104.42	-0.36945	465890000	669	104.424	1	1	1	126.31	140.45	104.42	1	125.713	0.0237817	125.71	1	126.313	0.0232605	126.31	NaN	NaN	NaN	NaN	NaN	NaN	NaN	NaN	NaN	NaN	NaN	NaN	NaN	NaN	NaN
P10398	226	P10398	P10398	Serine/threonine-protein kinase A-Raf	ARAF	RSTSTPNVHMVSTTAPMDSNLIQLTGQSFST	1012	P	3	1596		0.513868	0.000497866	44.915	44.915	44.915	-0.39892	22168000	226	1.01957	0.513868	NaN	NaN	44.915	NaN	NaN	NaN	NaN	NaN	NaN	NaN	NaN	NaN	NaN	0.513868	1.01957	0.000497866	44.915	NaN	NaN	NaN	NaN	NaN	NaN	NaN	NaN	NaN	NaN	NaN
P10398	194	P10398	P10398	Serine/threonine-protein kinase A-Raf	ARAF	LLTPQGPSPRTQHCDPEHFPFPAPANAPLQR	1013	P	4	1596		0.753553	0.0216063	42.172	39.665	42.172	0.82605	10057000	194	5.91892	0.753553	NaN	NaN	42.172	NaN	NaN	NaN	NaN	NaN	NaN	NaN	NaN	NaN	NaN	NaN	NaN	NaN	NaN	NaN	NaN	NaN	NaN	0.753553	5.91892	0.0216063	42.172	NaN	NaN	NaN
P10515	406	P10515	P10515	Dihydrolipoyllysine-residue acetyltransferase component of pyruvate dehydrogenase complex, mitochondrial	DLAT	SFVPSKVAPAPAAVVPPTGPGMAPVPTGVFT	1014	P	3	1599		0.361842	7.49506e-07	94.549	92.732	81.242	-0.4886	0	406	0	0.361842	0.359391	0.357709	81.242	82.157	94.549	0.348758	0.949481	7.45306e-06	70.151	0.361842	0	3.81454e-05	81.242	0.325885	0	7.49506e-07	65.093	NaN	NaN	NaN	NaN	NaN	NaN	NaN	NaN	NaN	NaN	NaN
P10515	407	P10515	P10515	Dihydrolipoyllysine-residue acetyltransferase component of pyruvate dehydrogenase complex, mitochondrial	DLAT	FVPSKVAPAPAAVVPPTGPGMAPVPTGVFTD	1015	P	3	1599		0.488112	7.49506e-07	96.982	96.982	95.347	-0.46992	0	407	0.797788	0.488112	0.474882	0.332133	95.347	96.982	82.62	0.26416	0	5.8009e-05	52.577	0.361842	0	3.81454e-05	81.242	0.488112	0.797788	7.49506e-07	95.347	NaN	NaN	NaN	NaN	NaN	NaN	NaN	NaN	NaN	NaN	NaN
P10515	410	P10515	P10515	Dihydrolipoyllysine-residue acetyltransferase component of pyruvate dehydrogenase complex, mitochondrial	DLAT	SKVAPAPAAVVPPTGPGMAPVPTGVFTDIPI	1016	P	4	1599		0.973457	5.38356e-05	96.748	94.958	96.748	-0.26871	798610000	410	15.9575	NaN	0.973457	0	NaN	96.748	NaN	NaN	NaN	NaN	NaN	NaN	NaN	NaN	NaN	NaN	NaN	NaN	NaN	NaN	NaN	NaN	NaN	NaN	NaN	NaN	NaN	NaN	NaN	NaN
P10515	101	P10515	P10515	Dihydrolipoyllysine-residue acetyltransferase component of pyruvate dehydrogenase complex, mitochondrial	DLAT	YSLPPHQKVPLPSLSPTMQAGTIARWEKKEG	1017	P	2	1599		1	0.000988756	113.99	95.72	113.99	-0.098434	782490000	101	73.2628	0.999441	0.999996	1	93.011	107.09	113.99	0.999441	32.5212	0.0351252	93.011	NaN	NaN	NaN	NaN	NaN	NaN	NaN	NaN	NaN	NaN	NaN	NaN	NaN	NaN	NaN	NaN	NaN	NaN	NaN
P10586	821	P10586	P10586	Receptor-type tyrosine-protein phosphatase F	PTPRF	GARSKPKIVTTTGAVPGRPTMMISTTAMNTA	1018	P	5	1600		0.834028	1.12819e-11	62.942	62.942	62.942	-2.3008	22163000	821	7.02385	NaN	NaN	0.834028	NaN	NaN	62.942	NaN	NaN	NaN	NaN	NaN	NaN	NaN	NaN	NaN	NaN	NaN	NaN	NaN	NaN	NaN	NaN	NaN	NaN	NaN	NaN	NaN	NaN	NaN
P10586	1324	P10586	P10586	Receptor-type tyrosine-protein phosphatase F	PTPRF	HSSDPVEMRRLNYQTPGMRDHPPIPITDLAD	1019	P	3	1600		0.991711	2.38058e-07	122.41	117.44	72.805	1.4532	113910000	1324	21.8594	0.865382	0.99033	0.991711	73.322	122.41	72.805	0.865382	8.5997	0.00250094	73.322	NaN	NaN	NaN	NaN	NaN	NaN	NaN	NaN	NaN	NaN	NaN	NaN	0.322029	0.879481	0.00330281	50.498	0.347894	0.582366	0.00627238
P10586	141	P10586	P10586	Receptor-type tyrosine-protein phosphatase F	PTPRF	EEEQLPPGFPSIDMGPQLKVVEKARTATMLC	1020	P	2	1600		0.998915	1.73329e-06	110.55	99.074	110.55	0.75225	164820000	141	30.0405	0.735532	0.998915	0.971357	79.346	110.55	94.461	NaN	NaN	NaN	NaN	NaN	NaN	NaN	NaN	0.735532	5.0502	0.00904209	79.346	NaN	NaN	NaN	NaN	NaN	NaN	NaN	NaN	NaN	NaN	NaN
P10586	1121	P10586	P10586	Receptor-type tyrosine-protein phosphatase F	PTPRF	PASAYIEDGRFDLSMPHVQDPSLVRWFYIVV	1021	P	5	1600		0.820981	3.47165e-09	67.209	60.397	67.209	-0.76284	89983000	1121	6.72872	NaN	0.820981	0.764723	NaN	67.209	63.97	NaN	NaN	NaN	NaN	NaN	NaN	NaN	NaN	NaN	NaN	NaN	NaN	NaN	NaN	NaN	NaN	NaN	NaN	NaN	NaN	NaN	NaN	NaN
P10586	1879	P10586	P10586	Receptor-type tyrosine-protein phosphatase F	PTPRF	VVDMFQTVKTLRTQRPAMVQTEDQYQLCYRA	1022	P	3	1600		1	0.00884782	76.713	68.624	76.713	-1.365	14824000	1879	76.7133	NaN	NaN	1	NaN	NaN	76.713	NaN	NaN	NaN	NaN	NaN	NaN	NaN	NaN	NaN	NaN	NaN	NaN	NaN	NaN	NaN	NaN	NaN	NaN	NaN	NaN	NaN	NaN	NaN
P10606	38	P10606	P10606	Cytochrome c oxidase subunit 5B, mitochondrial	COX5B	SGAAAMRSMASGGGVPTDEEQATGLEREIML	1023	P	3	1604		1	0.00121532	60.943	48.63	54.744	-0.75585	93347000	38	54.7436	1	NaN	1	54.744	NaN	60.943	NaN	NaN	NaN	NaN	NaN	NaN	NaN	NaN	1	54.7436	0.00264245	54.744	NaN	NaN	NaN	NaN	NaN	NaN	NaN	NaN	NaN	NaN	NaN
P10619	464	P10619	P10619	Lysosomal protective protein;Lysosomal protective protein 32 kDa chain;Lysosomal protective protein 20 kDa chain	CTSA	FLTIKGAGHMVPTDKPLAAFTMFSRFLNKQP	1024	P	2	1605		0.995545	0.0232793	62.924	62.924	62.924	1.9682	0	464	24.1365	NaN	0.995545	NaN	NaN	62.924	NaN	NaN	NaN	NaN	NaN	NaN	NaN	NaN	NaN	NaN	NaN	NaN	NaN	NaN	NaN	NaN	NaN	NaN	NaN	NaN	NaN	NaN	NaN	NaN
P10644	43	P10644	P10644	cAMP-dependent protein kinase type I-alpha regulatory subunit;cAMP-dependent protein kinase type I-alpha regulatory subunit, N-terminally processed	PRKAR1A	QALLKDSIVQLCTARPERPMAFLREYFERLE	1025	P	4	1608		0.988471	0.000911196	82.877	64.561	51.487	0.12584	180110000	43	19.3315	0.70235	0.988471	0.955986	58.693	82.877	55.437	NaN	NaN	NaN	NaN	0.70235	3.72848	0.0112628	58.693	NaN	NaN	NaN	NaN	NaN	NaN	NaN	NaN	NaN	NaN	NaN	NaN	NaN	NaN	NaN
P10644	320	P10644	P10644	cAMP-dependent protein kinase type I-alpha regulatory subunit;cAMP-dependent protein kinase type I-alpha regulatory subunit, N-terminally processed	PRKAR1A	RRSENEEFVEVGRLGPSDYFGEIALLMNRPR	1026	P	4	1608		0.518575	0.000195882	62.374	56.594	62.374	-1.5881	27385000	320	0.322833	NaN	0.518575	0	NaN	62.374	NaN	NaN	NaN	NaN	NaN	NaN	NaN	NaN	NaN	NaN	NaN	NaN	NaN	NaN	NaN	NaN	NaN	NaN	NaN	NaN	NaN	NaN	NaN	NaN
P10644	334	P10644	P10644	cAMP-dependent protein kinase type I-alpha regulatory subunit;cAMP-dependent protein kinase type I-alpha regulatory subunit, N-terminally processed	PRKAR1A	GPSDYFGEIALLMNRPRAATVVARGPLKCVK	1027	P	4	1608		0.983389	0.000289122	87.489	81.709	87.489	-0.74773	45099000	334	17.7232	NaN	NaN	0.983389	NaN	NaN	87.489	NaN	NaN	NaN	NaN	NaN	NaN	NaN	NaN	NaN	NaN	NaN	NaN	NaN	NaN	NaN	NaN	NaN	NaN	NaN	NaN	NaN	NaN	NaN
P10809	57	P10809	P10809	60 kDa heat shock protein, mitochondrial	HSPD1	QGVDLLADAVAVTMGPKGRTVIIEQSWGSPK	1028	P	3	1612		1	3.82317e-15	153.24	141.44	51.539	1.811	459290000	57	51.5387	1	1	1	153.24	103.14	106.14	1	153.237	3.82317e-15	153.24	1	117.745	4.6108e-10	134.21	1	58.7524	3.74019e-06	92.098	NaN	NaN	NaN	NaN	1	86.6415	6.65344e-05	86.641	1	101.357	3.1312e-05
P10809	550	P10809	P10809	60 kDa heat shock protein, mitochondrial	HSPD1	VASLLTTAEVVVTEIPKEEKDPGMGAMGGMG	1029	P	4	1612		1	1.21279e-17	107.98	107.98	88.149	0.67259	2450500000	550	88.1494	0.822019	0.812228	1	103.94	107.98	95.603	NaN	NaN	NaN	NaN	0.548436	4.97655	1.01425e-16	81.335	NaN	NaN	NaN	NaN	0.822019	6.69062	2.61899e-17	103.94	NaN	NaN	NaN	NaN	NaN	NaN	NaN
P10809	556	P10809	P10809	60 kDa heat shock protein, mitochondrial	HSPD1	TAEVVVTEIPKEEKDPGMGAMGGMGGGMGGG	1030	P	4	1612		1	1.39098e-16	95.603	95.603	88.149	0.67259	994290000	556	88.1494	NaN	0	1	NaN	NaN	95.603	NaN	NaN	NaN	NaN	NaN	NaN	NaN	NaN	NaN	NaN	NaN	NaN	NaN	NaN	NaN	NaN	NaN	NaN	NaN	NaN	NaN	NaN	NaN
P10809	71	P10809	P10809	60 kDa heat shock protein, mitochondrial	HSPD1	GPKGRTVIIEQSWGSPKVTKDGVTVAKSIDL	1031	P	2	1612		1	3.74008e-08	157.96	100.37	110.38	1.1073	1367000000	71	110.382	1	1	1	152.81	150.85	157.96	NaN	NaN	NaN	NaN	NaN	NaN	NaN	NaN	1	116.305	0.000331533	152.81	1	105.396	0.0758219	105.4	1	127.397	0.0254878	127.4	NaN	NaN	NaN
P11021	535	P11021	P11021	78 kDa glucose-regulated protein	HSPA5	NKNKITITNDQNRLTPEEIERMVNDAEKFAE	1032	P	4	1615		1	0.000921868	67.979	47.992	67.979	-0.021851	31298000	535	67.979	NaN	NaN	1	NaN	NaN	67.979	NaN	NaN	NaN	NaN	NaN	NaN	NaN	NaN	NaN	NaN	NaN	NaN	NaN	NaN	NaN	NaN	NaN	NaN	NaN	NaN	NaN	NaN	NaN
P11021	88	P11021	P11021	78 kDa glucose-regulated protein	HSPA5	ERLIGDAAKNQLTSNPENTVFDAKRLIGRTW	1033	P	3	1615		1	0.00941299	53.328	35.822	53.328	-4.415	57334000	88	53.3283	NaN	NaN	1	NaN	NaN	53.328	NaN	NaN	NaN	NaN	NaN	NaN	NaN	NaN	NaN	NaN	NaN	NaN	NaN	NaN	NaN	NaN	NaN	NaN	NaN	NaN	NaN	NaN	NaN
P11117	124	P11117	P11117	Lysosomal acid phosphatase	ACP2	RTLMSAEANLAGLFPPNGMQRFNPNISWQPI	1034	P	3	1617		0.799259	0.00904966	61.417	50.807	61.417	0.41654	53466000	124	6.00051	NaN	0.799259	NaN	NaN	61.417	NaN	NaN	NaN	NaN	NaN	NaN	NaN	NaN	NaN	NaN	NaN	NaN	NaN	NaN	NaN	NaN	NaN	NaN	NaN	NaN	NaN	NaN	NaN	NaN
P11142	465	P11142	P11142	Heat shock cognate 71 kDa protein	HSPA8	TKDNNLLGKFELTGIPPAPRGVPQIEVTFDI	1035	P	4	1619		0.304125	7.99375e-08	64.221	63.042	43.17	0.20408	0	465	0	0.304125	NaN	NaN	64.221	NaN	NaN	0.304125	0	0.000283145	43.17	NaN	NaN	NaN	NaN	0.25	0	7.99375e-08	64.221	NaN	NaN	NaN	NaN	NaN	NaN	NaN	NaN	NaN	NaN	NaN
P11142	466	P11142	P11142	Heat shock cognate 71 kDa protein	HSPA8	KDNNLLGKFELTGIPPAPRGVPQIEVTFDID	1036	P	4	1619		0.304125	7.99375e-08	64.221	63.042	43.17	0.20408	0	466	0	0.304125	NaN	NaN	64.221	NaN	NaN	0.304125	0	0.000283145	43.17	NaN	NaN	NaN	NaN	0.25	0	7.99375e-08	64.221	NaN	NaN	NaN	NaN	NaN	NaN	NaN	NaN	NaN	NaN	NaN
P11142	468	P11142	P11142	Heat shock cognate 71 kDa protein	HSPA8	NNLLGKFELTGIPPAPRGVPQIEVTFDIDAN	1037	P	4	1619		0.304125	7.99375e-08	64.221	63.042	43.17	0.20408	0	468	0	0.304125	NaN	NaN	64.221	NaN	NaN	0.304125	0	0.000283145	43.17	NaN	NaN	NaN	NaN	0.25	0	7.99375e-08	64.221	NaN	NaN	NaN	NaN	NaN	NaN	NaN	NaN	NaN	NaN	NaN
P11142	472	P11142	P11142	Heat shock cognate 71 kDa protein	HSPA8	GKFELTGIPPAPRGVPQIEVTFDIDANGILN	1038	P	3	1619		0.25	7.99375e-08	64.221	63.042	64.221	2.0141	0	472	0	0.25	NaN	NaN	64.221	NaN	NaN	NaN	NaN	NaN	NaN	NaN	NaN	NaN	NaN	0.25	0	7.99375e-08	64.221	NaN	NaN	NaN	NaN	NaN	NaN	NaN	NaN	NaN	NaN	NaN
P11142	91	P11142	P11142	Heat shock cognate 71 kDa protein	HSPA8	RRFDDAVVQSDMKHWPFMVVNDAGRPKVQVE	1039	P	3	1619		1	9.87075e-20	151.94	143.76	75.5	-0.61417	2737100000	91	73.9167	1	0.999995	0.999996	100.29	151.94	121.62	NaN	NaN	NaN	NaN	0.995224	23.1887	0.00390446	56.947	0.999905	40.6655	4.00155e-05	85.376	0.999873	39.1835	2.83896e-05	100.29	1	73.9167	0.00478915	75.5	NaN	NaN	NaN
P11142	63	P11142	P11142	Heat shock cognate 71 kDa protein	HSPA8	ERLIGDAAKNQVAMNPTNTVFDAKRLIGRRF	1040	P	2	1619		1	0.0208259	68.355	58.668	60.255	-0.46963	48583000	63	60.2551	1	NaN	1	68.355	NaN	60.255	NaN	NaN	NaN	NaN	NaN	NaN	NaN	NaN	NaN	NaN	NaN	NaN	NaN	NaN	NaN	NaN	1	55.4522	0.0208259	68.355	NaN	NaN	NaN
P11171	846	P11171	P11171	Protein 4.1	EPB41	DQVLVQAIKEAKEQHPDMSVTKVVVHQETEI	1041	P	6	1622		1	0.00081668	44.317	34.689	44.317	1.3532	52586000	846	44.3166	NaN	1	NaN	NaN	44.317	NaN	NaN	NaN	NaN	NaN	NaN	NaN	NaN	NaN	NaN	NaN	NaN	NaN	NaN	NaN	NaN	NaN	NaN	NaN	NaN	NaN	NaN	NaN	NaN
P11171	379	P11171	P11171	Protein 4.1	EPB41	EEKVMELHKSYRSMTPAQADLEFLENAKKLS	1042	P	3	1622		1	0.00127788	78.326	68.538	78.326	-0.2711	48562000	379	78.3256	1	NaN	NaN	78.326	NaN	NaN	NaN	NaN	NaN	NaN	NaN	NaN	NaN	NaN	NaN	NaN	NaN	NaN	1	78.3256	0.00127788	78.326	NaN	NaN	NaN	NaN	NaN	NaN	NaN
P11171	781	P11171	P11171	Protein 4.1	EPB41	TYEAAQTDDNSGDLDPGVLLTAQTITSETPS	1043	P	3	1622		0.973104	0.000126934	45.924	43.483	45.924	3.1062	4271000	781	15.5847	0.973104	NaN	NaN	45.924	NaN	NaN	NaN	NaN	NaN	NaN	NaN	NaN	NaN	NaN	0.973104	15.5847	0.000126934	45.924	NaN	NaN	NaN	NaN	NaN	NaN	NaN	NaN	NaN	NaN	NaN
P11172	410	P11172	P11172	Uridine 5'-monophosphate synthase;Orotate phosphoribosyltransferase;Orotidine 5'-phosphate decarboxylase	UMPS	EFVVGFISGSRVSMKPEFLHLTPGVQLEAGG	1044	P	4	1623		0.999967	3.12575e-25	148.36	142.49	145.47	1.3401	2846500000	410	44.7536	0.999967	0.998894	0.999948	148.36	125.42	139.16	0.99524	23.2036	3.12575e-25	148.36	0.999967	44.7536	1.64567e-18	145.47	NaN	NaN	NaN	NaN	0.993535	21.8665	7.19013e-09	111.27	0.916953	10.4302	3.83566e-07	82.336	0.98106	17.1432	2.74878e-07
P11172	417	P11172	P11172	Uridine 5'-monophosphate synthase;Orotate phosphoribosyltransferase;Orotidine 5'-phosphate decarboxylase	UMPS	SGSRVSMKPEFLHLTPGVQLEAGGDNLGQQY	1045	P	6	1623		0.624919	2.16737e-09	68.333	66.86	68.333	2.2745	50368000	417	2.217	0.624919	0	0	68.333	NaN	NaN	0.624919	2.217	2.16737e-09	68.333	NaN	NaN	NaN	NaN	NaN	NaN	NaN	NaN	NaN	NaN	NaN	NaN	0	0	NaN	NaN	0	0	NaN
P11177	313	P11177	P11177	Pyruvate dehydrogenase E1 component subunit beta, mitochondrial	PDHB	QFGVGAEICARIMEGPAFNFLDAPAVRVTGA	1046	P	3	1624		0.999999	0.0111204	60.209	49.87	60.209	0.11391	251330000	313	59.2455	NaN	NaN	0.999999	NaN	NaN	60.209	NaN	NaN	NaN	NaN	NaN	NaN	NaN	NaN	NaN	NaN	NaN	NaN	NaN	NaN	NaN	NaN	NaN	NaN	NaN	NaN	NaN	NaN	NaN
P11177	273	P11177	P11177	Pyruvate dehydrogenase E1 component subunit beta, mitochondrial	PDHB	KEGVECEVINMRTIRPMDMETIEASVMKTNH	1047	P	3	1624		1	2.99841e-05	115.31	85.971	55.864	-0.96317	2339200000	273	55.8644	1	1	1	83.966	115.31	102.78	1	83.9663	0.000295796	83.966	1	83.9663	0.000157074	83.966	1	82.5896	9.95317e-05	82.59	NaN	NaN	NaN	NaN	NaN	NaN	NaN	NaN	NaN	NaN	NaN
P11216	560	P11216	P11216	Glycogen phosphorylase, brain form	PYGB	KFSAFLEKEYKVKINPSSMFDVHVKRIHEYK	1048	P	4	1626		1	0.0169587	62.258	57.047	62.258	0.12701	157940000	560	62.2584	1	NaN	1	62.258	NaN	62.258	NaN	NaN	NaN	NaN	1	62.2584	0.0169587	62.258	NaN	NaN	NaN	NaN	NaN	NaN	NaN	NaN	NaN	NaN	NaN	NaN	NaN	NaN	NaN
P11216	343	P11216	P11216	Glycogen phosphorylase, brain form	PYGB	ETFPDKVAIQLNDTHPALSIPELMRILVDVE	1049	P	4	1626		0.635635	0.000110391	70.107	64.563	70.107	-0.57541	189170000	343	2.41675	0.635635	NaN	NaN	70.107	NaN	NaN	0.635635	2.41675	0.000110391	70.107	0	0	NaN	NaN	NaN	NaN	NaN	NaN	NaN	NaN	NaN	NaN	NaN	NaN	NaN	NaN	NaN	NaN	NaN
P11216	348	P11216	P11216	Glycogen phosphorylase, brain form	PYGB	KVAIQLNDTHPALSIPELMRILVDVEKVDWD	1050	P	4	1626		0.998053	1.02147e-09	134.97	125.26	134.97	-0.65169	1117800000	348	27.0986	0.997745	0.998053	0.957186	80.238	134.97	101.49	0.965284	14.4514	0.00105944	52.685	0	0	NaN	NaN	0.997745	26.4585	0.000847686	80.238	NaN	NaN	NaN	NaN	NaN	NaN	NaN	NaN	NaN	NaN	NaN
P11274	107	P11274	P11274	Breakpoint cluster region protein	BCR	ASASRPQPAPADGADPPPAEEPEARPDGEGS	1051	P	4	1629		0.973933	0.000831404	46.31	42.825	46.31	-0.17426	37029000	107	15.0808	0.973933	NaN	NaN	46.31	NaN	NaN	0.973933	15.0808	0.000831404	46.31	NaN	NaN	NaN	NaN	NaN	NaN	NaN	NaN	NaN	NaN	NaN	NaN	NaN	NaN	NaN	NaN	NaN	NaN	NaN
P11274	108	P11274	P11274	Breakpoint cluster region protein	BCR	SASRPQPAPADGADPPPAEEPEARPDGEGSP	1052	P	4	1629		0.973933	0.000831404	46.31	42.825	46.31	-0.17426	37029000	108	15.0808	0.973933	NaN	NaN	46.31	NaN	NaN	0.973933	15.0808	0.000831404	46.31	NaN	NaN	NaN	NaN	NaN	NaN	NaN	NaN	NaN	NaN	NaN	NaN	NaN	NaN	NaN	NaN	NaN	NaN	NaN
P11274	109	P11274	P11274	Breakpoint cluster region protein	BCR	ASRPQPAPADGADPPPAEEPEARPDGEGSPG	1053	P	4	1629		0.973933	0.000831404	46.31	42.825	46.31	-0.17426	37029000	109	15.0808	0.973933	NaN	NaN	46.31	NaN	NaN	0.973933	15.0808	0.000831404	46.31	NaN	NaN	NaN	NaN	NaN	NaN	NaN	NaN	NaN	NaN	NaN	NaN	NaN	NaN	NaN	NaN	NaN	NaN	NaN
P11274	113	P11274	P11274	Breakpoint cluster region protein	BCR	QPAPADGADPPPAEEPEARPDGEGSPGKARP	1054	P	4	1629		0.882856	0.000831404	46.31	42.825	46.31	-0.17426	37029000	113	7.85821	0.882856	NaN	NaN	46.31	NaN	NaN	0.882856	7.85821	0.000831404	46.31	NaN	NaN	NaN	NaN	NaN	NaN	NaN	NaN	NaN	NaN	NaN	NaN	NaN	NaN	NaN	NaN	NaN	NaN	NaN
P11274	117	P11274	P11274	Breakpoint cluster region protein	BCR	ADGADPPPAEEPEARPDGEGSPGKARPGTAR	1055	P	4	1629		0.882856	0.000831404	46.31	42.825	46.31	-0.17426	37029000	117	7.85821	0.882856	NaN	NaN	46.31	NaN	NaN	0.882856	7.85821	0.000831404	46.31	NaN	NaN	NaN	NaN	NaN	NaN	NaN	NaN	NaN	NaN	NaN	NaN	NaN	NaN	NaN	NaN	NaN	NaN	NaN
P11388	942	P11388	P11388	DNA topoisomerase 2-alpha	TOP2A	PVRTWTQTYKEQVLEPMLNGTEKTPPLITDY	1056	P	3	1635		1	2.15876e-135	304.8	245.57	57.009	-1.4196	1892700000	942	57.0089	1	1	1	218.2	304.8	240.2	NaN	NaN	NaN	NaN	1	185.27	1.09228e-21	185.27	1	218.204	1.73749e-39	218.2	1	185.947	1.0259e-21	185.95	NaN	NaN	NaN	NaN	NaN	NaN	NaN
P11388	562	P11388	P11388	DNA topoisomerase 2-alpha	TOP2A	SHIKGLLINFIHHNWPSLLRHRFLEEFITPI	1057	P	6	1635		1	3.41814e-06	62.683	57.922	62.683	-0.95272	22527000	562	62.6828	NaN	1	NaN	NaN	62.683	NaN	NaN	NaN	NaN	NaN	NaN	NaN	NaN	NaN	NaN	NaN	NaN	NaN	NaN	NaN	NaN	NaN	NaN	NaN	NaN	NaN	NaN	NaN	NaN
P11388	1163	P11388	P11388	DNA topoisomerase 2-alpha	TOP2A	RNEKEQELDTLKRKSPSDLWKEDLATFIEEL	1058	P	4	1635		1	1.56837e-06	115.55	103.47	86.236	1.2416	54442000	1163	86.2357	1	1	NaN	115.55	95.835	NaN	NaN	NaN	NaN	NaN	1	67.6053	1.56837e-06	115.55	1	86.2357	3.11727e-05	86.236	NaN	NaN	NaN	NaN	NaN	NaN	NaN	NaN	NaN	NaN	NaN
P11388	887	P11388	P11388	DNA topoisomerase 2-alpha	TOP2A	IVNNIRRLMDGEEPLPMLPSYKNFKGTIEEL	1059	P	2	1635		0.998311	0.000310679	138.45	138.45	138.45	-0.67878	1780500000	887	28.7277	0.998311	0.978956	0.996277	138.45	107.34	126.12	0.974606	17.8115	0.00448128	82.362	0	0	NaN	NaN	0.828026	7.58464	0.0376425	48.547	0.998311	28.7277	0.000310679	138.45	NaN	NaN	NaN	NaN	NaN	NaN	NaN
P11388	371	P11388	P11388	DNA topoisomerase 2-alpha	TOP2A	VKNHMWIFVNALIENPTFDSQTKENMTLQPK	1060	P	3	1635		0.890396	0.00052202	66.012	60.637	66.012	0.37437	79888000	371	9.09758	0.890396	NaN	NaN	66.012	NaN	NaN	NaN	NaN	NaN	NaN	NaN	NaN	NaN	NaN	0.890396	9.09758	0.00052202	66.012	NaN	NaN	NaN	NaN	NaN	NaN	NaN	NaN	NaN	NaN	NaN
P11388	1389	P11388	P11388	DNA topoisomerase 2-alpha	TOP2A	SVVSDLEADDVKGSVPLSSSPPATHFPDETE	1061	P	3	1635		0.974467	2.16698e-08	66.828	63.8	53.728	-2.3505	8958400000	1389	13.0567	0.974467	0.971085	0.894345	66.828	45.751	46.351	0.91217	5.55604	0.000337528	40.864	NaN	NaN	NaN	NaN	0.974467	13.0567	1.35282e-05	53.728	0.938371	6.46207	2.16698e-08	66.828	NaN	NaN	NaN	NaN	NaN	NaN	NaN
P11388	1394	P11388	P11388	DNA topoisomerase 2-alpha	TOP2A	LEADDVKGSVPLSSSPPATHFPDETEITNPV	1062	P	4	1635		0.962954	2.16698e-08	66.828	63.8	44.915	-1.487	9382000000	1394	11.5579	0.924488	0.962954	0.88022	66.828	50.817	46.351	0.898235	4.91648	0.000337528	40.864	NaN	NaN	NaN	NaN	0.885418	6.53653	1.35282e-05	53.728	0.924488	6.6478	2.16698e-08	66.828	NaN	NaN	NaN	NaN	NaN	NaN	NaN
P11388	1395	P11388	P11388	DNA topoisomerase 2-alpha	TOP2A	EADDVKGSVPLSSSPPATHFPDETEITNPVP	1063	P	4	1635		0.962954	2.16698e-08	66.828	63.8	44.915	-1.487	9382000000	1395	11.5579	0.924488	0.962954	0.88022	66.828	50.817	46.351	0.898235	4.91648	0.000337528	40.864	NaN	NaN	NaN	NaN	0.885418	6.53653	1.35282e-05	53.728	0.924488	6.6478	2.16698e-08	66.828	NaN	NaN	NaN	NaN	NaN	NaN	NaN
P11388	1400	P11388	P11388	DNA topoisomerase 2-alpha	TOP2A	KGSVPLSSSPPATHFPDETEITNPVPKKNVT	1064	P	3	1635		0.945558	2.16698e-08	66.828	63.8	50.817	-1.4976	9382000000	1400	10.4916	0.924488	0.945558	0.88022	66.828	50.817	46.351	0	0	NaN	NaN	NaN	NaN	NaN	NaN	0.885418	6.53653	1.35282e-05	53.728	0.924488	6.6478	2.16698e-08	66.828	NaN	NaN	NaN	NaN	NaN	NaN	NaN
P11388	1408	P11388	P11388	DNA topoisomerase 2-alpha	TOP2A	SPPATHFPDETEITNPVPKKNVTVKKTAAKS	1065	P	3	1635		0.945558	2.16698e-08	66.828	63.8	50.817	-1.4976	9382000000	1408	10.4916	0.938371	0.945558	0.88022	66.828	50.817	46.351	0.898235	4.91648	0.000337528	40.864	NaN	NaN	NaN	NaN	0.885418	6.53653	1.35282e-05	53.728	0.938371	6.46207	2.16698e-08	66.828	NaN	NaN	NaN	NaN	NaN	NaN	NaN
P11388	1410	P11388	P11388	DNA topoisomerase 2-alpha	TOP2A	PATHFPDETEITNPVPKKNVTVKKTAAKSQS	1066	P	4	1635		0.941942	2.16698e-08	66.828	63.8	46.608	-1.7828	7535300000	1410	6.72133	0.941942	0.827436	0	66.828	50.817	NaN	0.708805	0.350621	0.000337528	40.864	NaN	NaN	NaN	NaN	0	0	NaN	NaN	0.941942	6.72133	2.16698e-08	66.828	NaN	NaN	NaN	NaN	NaN	NaN	NaN
P11413	409	P11413	P11413	Glucose-6-phosphate 1-dehydrogenase	G6PD	VQPNEAVYTKMMTKKPGMFFNPEESELDLTY	1067	P	4	1636		0.99992	5.52213e-06	93.837	86.391	93.837	1.5676	465320000	409	40.9842	NaN	0.99992	0.999576	NaN	93.837	88.396	NaN	NaN	NaN	NaN	NaN	NaN	NaN	NaN	NaN	NaN	NaN	NaN	NaN	NaN	NaN	NaN	NaN	NaN	NaN	NaN	NaN	NaN	NaN
P11413	415	P11413	P11413	Glucose-6-phosphate 1-dehydrogenase	G6PD	VYTKMMTKKPGMFFNPEESELDLTYGNRYKN	1068	P	2	1636		0.981342	1.11203e-05	111.63	108.48	86.467	0.2173	2281700000	415	17.2095	0.981342	0.964276	0.966044	86.467	93.958	111.63	0.981342	17.2095	0.0605902	86.467	NaN	NaN	NaN	NaN	0.662975	2.93835	0.00691349	81.357	NaN	NaN	NaN	NaN	NaN	NaN	NaN	NaN	NaN	NaN	NaN
P11441	92	P11441	P11441	Ubiquitin-like protein 4A	UBL4A	VLLEEGEAQRLADSPPPQVWQLISKVLARHF	1069	P	2	1637		0.999679	0.0294423	87.184	71.428	87.184	1.7323	66922000	92	34.9374	0.999679	NaN	NaN	87.184	NaN	NaN	0	0	NaN	NaN	0.999679	34.9374	0.0294423	87.184	NaN	NaN	NaN	NaN	NaN	NaN	NaN	NaN	NaN	NaN	NaN	NaN	NaN	NaN	NaN
P11441	93	P11441	P11441	Ubiquitin-like protein 4A	UBL4A	LLEEGEAQRLADSPPPQVWQLISKVLARHFS	1070	P	2	1637		0.999679	0.0294423	87.184	71.428	87.184	1.7323	66922000	93	34.9374	0.999679	NaN	NaN	87.184	NaN	NaN	0	0	NaN	NaN	0.999679	34.9374	0.0294423	87.184	NaN	NaN	NaN	NaN	NaN	NaN	NaN	NaN	NaN	NaN	NaN	NaN	NaN	NaN	NaN
P11498	827	P11498	P11498	Pyruvate carboxylase, mitochondrial	PC	ALVACTRGTPLDTEVPMERVFDYSEYWEGAR	1071	P	2	1639	+	1	0.0217653	128.03	96.541	128.03	2.4117	197440000	827	106.289	NaN	1	NaN	NaN	128.03	NaN	NaN	NaN	NaN	NaN	NaN	NaN	NaN	NaN	NaN	NaN	NaN	NaN	NaN	NaN	NaN	NaN	NaN	NaN	NaN	NaN	NaN	NaN	NaN
P11498	561	P11498	P11498	Pyruvate carboxylase, mitochondrial	PC	LREGPEGFARAVRNHPGLLLMDTTFRDAHQS	1072	P	4	1639		1	0.0106264	47.808	41.904	47.808	0.76865	29569000	561	47.8076	1	NaN	1	47.392	NaN	47.808	NaN	NaN	NaN	NaN	NaN	NaN	NaN	NaN	0	0	NaN	NaN	NaN	NaN	NaN	NaN	1	47.3921	0.0115602	47.392	NaN	NaN	NaN
P11586	272	P11586	P11586	C-1-tetrahydrofolate synthase, cytoplasmic;Methylenetetrahydrofolate dehydrogenase;Methenyltetrahydrofolate cyclohydrolase;Formyltetrahydrofolate synthetase;C-1-tetrahydrofolate synthase, cytoplasmic, N-terminally processed	MTHFD1	AYDEAKERASFITPVPGGVGPMTVAMLMQST	1073	P	3	1641		0.987983	0.00931161	44.596	44.596	44.596	-0.96156	214120000	272	19.0963	NaN	NaN	0.987983	NaN	NaN	44.596	NaN	NaN	NaN	NaN	NaN	NaN	NaN	NaN	NaN	NaN	NaN	NaN	NaN	NaN	NaN	NaN	NaN	NaN	NaN	NaN	NaN	NaN	NaN
P11586	277	P11586	P11586	C-1-tetrahydrofolate synthase, cytoplasmic;Methylenetetrahydrofolate dehydrogenase;Methenyltetrahydrofolate cyclohydrolase;Formyltetrahydrofolate synthetase;C-1-tetrahydrofolate synthase, cytoplasmic, N-terminally processed	MTHFD1	KERASFITPVPGGVGPMTVAMLMQSTVESAK	1074	P	3	1641		0.987983	8.76466e-06	97.063	97.063	44.596	-0.96156	783350000	277	19.0963	0.965793	0.953889	0.987983	93.147	97.063	57.845	0.965793	14.697	0.000107878	93.147	NaN	NaN	NaN	NaN	NaN	NaN	NaN	NaN	NaN	NaN	NaN	NaN	NaN	NaN	NaN	NaN	NaN	NaN	NaN
P11586	621	P11586	P11586	C-1-tetrahydrofolate synthase, cytoplasmic;Methylenetetrahydrofolate dehydrogenase;Methenyltetrahydrofolate cyclohydrolase;Formyltetrahydrofolate synthetase;C-1-tetrahydrofolate synthase, cytoplasmic, N-terminally processed	MTHFD1	GVSGALTVLMKDAIKPNLMQTLEGTPVFVHA	1075	P	5	1641		1	1.68648e-13	115.4	108.26	115.4	0.3039	562350000	621	67.9381	0.999885	1	0.999863	77.531	115.4	73.665	NaN	NaN	NaN	NaN	0.974102	15.7618	1.17133e-11	67.062	0.999885	39.4134	2.20489e-11	77.531	0.86343	8.00967	2.08811e-07	54.856	NaN	NaN	NaN	NaN	NaN	NaN	NaN
P11586	434	P11586	P11586	C-1-tetrahydrofolate synthase, cytoplasmic;Methylenetetrahydrofolate dehydrogenase;Methenyltetrahydrofolate cyclohydrolase;Formyltetrahydrofolate synthetase;C-1-tetrahydrofolate synthase, cytoplasmic, N-terminally processed	MTHFD1	GIKGGAAGGGYSQVIPMEEFNLHLTGDIHAI	1076	P	3	1641		1	8.44706e-40	160.8	148.3	160.8	-2.0256	800800000	434	160.8	1	1	1	107.45	151.73	160.8	1	91.217	3.68113e-11	91.217	1	107.452	1.46445e-11	107.45	NaN	NaN	NaN	NaN	NaN	NaN	NaN	NaN	NaN	NaN	NaN	NaN	NaN	NaN	NaN
P11586	219	P11586	P11586	C-1-tetrahydrofolate synthase, cytoplasmic;Methylenetetrahydrofolate dehydrogenase;Methenyltetrahydrofolate cyclohydrolase;Formyltetrahydrofolate synthetase;C-1-tetrahydrofolate synthase, cytoplasmic, N-terminally processed	MTHFD1	EEVNKGDILVVATGQPEMVKGEWIKPGAIVI	1077	P	4	1641		1	0.00191008	56.303	48.406	42.106	0.55645	155950000	219	42.1064	1	NaN	NaN	56.303	NaN	NaN	NaN	NaN	NaN	NaN	NaN	NaN	NaN	NaN	NaN	NaN	NaN	NaN	NaN	NaN	NaN	NaN	NaN	NaN	NaN	NaN	1	42.1064	0.00191008
P11766	243	P11766	P11766	Alcohol dehydrogenase class-3	ADH5	KFARAKEFGATECINPQDFSKPIQEVLIEMT	1078	P	2	1643		1	0.0142902	106.4	85.699	88.134	-0.048494	191630000	243	88.1337	1	NaN	NaN	106.4	NaN	NaN	NaN	NaN	NaN	NaN	NaN	NaN	NaN	NaN	NaN	NaN	NaN	NaN	NaN	NaN	NaN	NaN	1	93.4419	0.0142902	106.4	1	88.1337	0.0261101
P11802	262	P11802	P11802	Cyclin-dependent kinase 4	CDK4	GAFPPRGPRPVQSVVPEMEESGAQLLLEMLT	1079	P	5	1644		0.992531	8.72343e-14	143.92	143.92	143.92	0.2317	708060000	262	21.2356	0.918085	0.930671	0.992531	79.512	104.29	143.92	NaN	NaN	NaN	NaN	NaN	NaN	NaN	NaN	0.918085	10.4958	4.58646e-05	79.512	NaN	NaN	NaN	NaN	NaN	NaN	NaN	NaN	NaN	NaN	NaN
P11802	239	P11802	P11802	Cyclin-dependent kinase 4	CDK4	GKIFDLIGLPPEDDWPRDVSLPRGAFPPRGP	1080	P	3	1644		0.993515	0.00247987	73.783	66.366	73.783	0.89914	12421000	239	23.3587	0.993515	NaN	NaN	73.783	NaN	NaN	NaN	NaN	NaN	NaN	NaN	NaN	NaN	NaN	0.993515	23.3587	0.00247987	73.783	NaN	NaN	NaN	NaN	NaN	NaN	NaN	NaN	NaN	NaN	NaN
P11802	245	P11802	P11802	Cyclin-dependent kinase 4	CDK4	IGLPPEDDWPRDVSLPRGAFPPRGPRPVQSV	1081	P	3	1644		0.987001	0.00247987	73.783	66.366	73.783	0.89914	12421000	245	23.3587	0.987001	NaN	NaN	73.783	NaN	NaN	NaN	NaN	NaN	NaN	NaN	NaN	NaN	NaN	0.987001	23.3587	0.00247987	73.783	NaN	NaN	NaN	NaN	NaN	NaN	NaN	NaN	NaN	NaN	NaN
P11908	276	P11908	P11908	Ribose-phosphate pyrophosphokinase 2	PRPS2	INNAAFEAVVVTNTIPQEDKMKHCTKIQVID	1082	P	4	1646		1	2.57307e-06	120.63	112.73	73.655	0.60993	377190000	276	73.6546	1	1	1	80.132	120.63	50.851	1	80.1318	0.00023804	80.132	NaN	NaN	NaN	NaN	NaN	NaN	NaN	NaN	1	73.6546	0.00049064	73.655	NaN	NaN	NaN	NaN	NaN	NaN	NaN
P11940	600	P11940	P11940	Polyadenylate-binding protein 1	PABPC1	LLEIDNSELLHMLESPESLRSKVDEAVAVLQ	1083	P	6	1648		1	2.71479e-12	72.879	71.645	72.879	-0.44177	322130000	600	72.879	1	0.857124	0	72.879	50.706	NaN	NaN	NaN	NaN	NaN	1	72.879	2.71479e-12	72.879	0	0	NaN	NaN	NaN	NaN	NaN	NaN	NaN	NaN	NaN	NaN	NaN	NaN	NaN
P11940	568	P11940	P11940	Polyadenylate-binding protein 1	PABPC1	APPQEQKQMLGERLFPLIQAMHPTLAGKITG	1084	P	5	1648		0.999998	2.04286e-10	73.707	73.707	58.131	-2.0652	492250000	568	57.0441	NaN	0.999998	0.989519	NaN	58.131	73.707	NaN	NaN	NaN	NaN	NaN	NaN	NaN	NaN	NaN	NaN	NaN	NaN	NaN	NaN	NaN	NaN	NaN	NaN	NaN	NaN	NaN	NaN	NaN
P11940	575	P11940	P11940	Polyadenylate-binding protein 1	PABPC1	QMLGERLFPLIQAMHPTLAGKITGMLLEIDN	1085	P	4	1648		1	2.85582e-35	160.4	155.35	160.4	0.056244	1329500000	575	64.2778	1	0.999997	0.998115	160.4	65.58	80.693	NaN	NaN	NaN	NaN	1	64.2778	2.85582e-35	160.4	0.972378	17.9762	1.23995e-08	100.63	NaN	NaN	NaN	NaN	NaN	NaN	NaN	NaN	NaN	NaN	NaN
P11940	6	P11940	P11940	Polyadenylate-binding protein 1	PABPC1	__________MNPSAPSYPMASLYVGDLHPD	1086	P	3	1648		0.513038	6.7791e-12	108.44	108.44	108.44	-0.12463	135860000	6	0.725509	0.510672	0.486906	0.513038	98.551	80.828	108.44	NaN	NaN	NaN	NaN	0	0	NaN	NaN	0.510672	0.676219	9.67903e-12	98.551	NaN	NaN	NaN	NaN	NaN	NaN	NaN	NaN	NaN	NaN	NaN
P11940	9	P11940	P11940	Polyadenylate-binding protein 1	PABPC1	_______MNPSAPSYPMASLYVGDLHPDVTE	1087	P	4	1648		0.993389	3.2503e-18	126.16	126.16	110.78	-0.70451	3771700000	9	22.0504	0.850474	0.993389	0.975408	92.991	125.37	126.16	0.850474	7.92142	5.95127e-05	92.991	0	0	NaN	NaN	NaN	NaN	NaN	NaN	NaN	NaN	NaN	NaN	NaN	NaN	NaN	NaN	NaN	NaN	NaN
P11940	20	P11940	P11940	Polyadenylate-binding protein 1	PABPC1	APSYPMASLYVGDLHPDVTEAMLYEKFSPAG	1088	P	4	1648		0.999765	3.2503e-18	126.16	126.16	43.622	-0.69545	2644500000	20	38.194	0.999083	0.989419	0.999765	58.11	125.37	126.16	NaN	NaN	NaN	NaN	0.998472	29.0243	0.000291646	49.199	0.999083	30.5995	5.32216e-05	58.11	NaN	NaN	NaN	NaN	NaN	NaN	NaN	NaN	NaN	NaN	NaN
P11940	535	P11940	P11940	Polyadenylate-binding protein 1	PABPC1	PQQHLNAQPQVTMQQPAVHVQGQEPLTASML	1089	P	4	1648		0.78773	1.10108e-13	117.15	113.81	117.15	-0.63381	254440000	535	5.73684	0.560252	0.78773	NaN	49.193	117.15	NaN	NaN	NaN	NaN	NaN	NaN	NaN	NaN	NaN	NaN	NaN	NaN	NaN	0.560252	0.565409	0.000802436	49.193	NaN	NaN	NaN	NaN	NaN	NaN	NaN
P11940	544	P11940	P11940	Polyadenylate-binding protein 1	PABPC1	QVTMQQPAVHVQGQEPLTASMLASAPPQEQK	1090	P	4	1648		0.978833	5.9485e-11	91.269	87.267	91.269	0.62929	495540000	544	16.7079	0.978833	0.831125	0.835004	91.269	54.983	74.328	NaN	NaN	NaN	NaN	0.978833	16.7079	5.9485e-11	91.269	NaN	NaN	NaN	NaN	NaN	NaN	NaN	NaN	0.697842	3.70976	8.98923e-08	51.393	NaN	NaN	NaN
P11940;Q13310	62;62	P11940;Q13310	P11940	Polyadenylate-binding protein 1;Polyadenylate-binding protein 4	PABPC1;PABPC4	ITRRSLGYAYVNFQQPADAERALDTMNFDVI	1091	P	3	1648;3556		1	0.0100901	54.259	48.809	54.259	0.60455	125210000	62	54.2594	1	NaN	NaN	54.259	NaN	NaN	NaN	NaN	NaN	NaN	NaN	NaN	NaN	NaN	NaN	NaN	NaN	NaN	1	54.2594	0.0100901	54.259	NaN	NaN	NaN	NaN	NaN	NaN	NaN
P12004	220	P12004	P12004	Proliferating cell nuclear antigen	PCNA	LTFALRYLNFFTKATPLSSTVTLSMSADVPL	1092	P	4	1649		0.999955	1.33655e-05	82.62	82.62	62.611	-1.3178	6745600000	220	43.5022	0.999623	0.999955	0.999907	60.278	64.295	82.62	NaN	NaN	NaN	NaN	0.998888	29.536	0.00214966	60.278	0.999623	34.2328	0.000960169	60.036	0.99941	32.2913	0.0062451	50.851	NaN	NaN	NaN	NaN	NaN	NaN	NaN
P12004	129	P12004	P12004	Proliferating cell nuclear antigen	PCNA	YEMKLMDLDVEQLGIPEQEYSCVVKMPSGEF	1093	P	3	1649		1	0.000901339	63.436	59.485	63.436	0.32761	19262000	129	63.4363	1	NaN	NaN	63.436	NaN	NaN	NaN	NaN	NaN	NaN	NaN	NaN	NaN	NaN	NaN	NaN	NaN	NaN	NaN	NaN	NaN	NaN	1	63.4363	0.000901339	63.436	NaN	NaN	NaN
P12004	202	P12004	P12004	Proliferating cell nuclear antigen	PCNA	NVDKEEEAVTIEMNEPVQLTFALRYLNFFTK	1094	P	5	1649		1	0.00317025	44.555	39.011	44.555	0.034709	28389000	202	44.5551	1	NaN	NaN	44.555	NaN	NaN	NaN	NaN	NaN	NaN	1	44.5551	0.00317025	44.555	NaN	NaN	NaN	NaN	NaN	NaN	NaN	NaN	NaN	NaN	NaN	NaN	NaN	NaN	NaN
P12074	83	P12074	P12074	Cytochrome c oxidase subunit 6A1, mitochondrial	COX6A1	RPEFIAYPHLRIRTKPFPWGDGNHTLFHNPH	1095	P	4	1651		0.754872	0.0107993	57.339	51.796	57.339	-0.58061	43895000	83	2.67947	NaN	0.754872	NaN	NaN	57.339	NaN	NaN	NaN	NaN	NaN	NaN	NaN	NaN	NaN	NaN	NaN	NaN	NaN	NaN	NaN	NaN	NaN	NaN	NaN	NaN	NaN	NaN	NaN	NaN
P12074	85	P12074	P12074	Cytochrome c oxidase subunit 6A1, mitochondrial	COX6A1	EFIAYPHLRIRTKPFPWGDGNHTLFHNPHVN	1096	P	4	1651		0.691697	0.0107993	57.339	51.796	57.339	-0.58061	43895000	85	1.67685	NaN	0.691697	NaN	NaN	57.339	NaN	NaN	NaN	NaN	NaN	NaN	NaN	NaN	NaN	NaN	NaN	NaN	NaN	NaN	NaN	NaN	NaN	NaN	NaN	NaN	NaN	NaN	NaN	NaN
P12235;P12236	133;133	P12235;P12236	P12236	ADP/ATP translocase 1;ADP/ATP translocase 3;ADP/ATP translocase 3, N-terminally processed	SLC25A4;SLC25A6	ASGGAAGATSLCFVYPLDFARTRLAADVGKG;ASGGAAGATSLCFVYPLDFARTRLAADVGKS	1097	P	2	1654;1655		1	0.0228591	97.797	86.853	97.797	-0.61693	26979000	133	97.7972	1	NaN	NaN	97.797	NaN	NaN	NaN	NaN	NaN	NaN	NaN	NaN	NaN	NaN	NaN	NaN	NaN	NaN	1	97.7972	0.0228591	97.797	NaN	NaN	NaN	NaN	NaN	NaN	NaN
P12270	1678	P12270	P12270	Nucleoprotein TPR	TPR	DPPTANIKPTPVVSTPSKVTAAAMAGNKSTP	1098	P	4	1657		0.925607	0.0026933	45.22	39.9	45.22	0.4821	41513000	1678	12.4225	NaN	0.925607	NaN	NaN	45.22	NaN	NaN	NaN	NaN	NaN	NaN	NaN	NaN	NaN	NaN	NaN	NaN	NaN	NaN	NaN	NaN	NaN	NaN	NaN	NaN	NaN	NaN	NaN	NaN
P12277	275	P12277	P12277	Creatine kinase B-type	CKB	IETLFKSKDYEFMWNPHLGYILTCPSNLGTG	1099	P	3	1658		1	7.46725e-28	163.94	157.65	59.628	-1.6792	13317000000	275	59.6283	1	1	1	107.87	163.76	163.94	1	44.1613	0.000243881	69.444	1	45.9408	0.0082099	45.941	1	41.7627	5.84236e-05	107.87	0.999192	30.9221	0.00167919	52.122	0.999938	42.0608	0.000158276	73.036	0.942523	12.148	0.0136047
P12277	284	P12277	P12277	Creatine kinase B-type	CKB	YEFMWNPHLGYILTCPSNLGTGLRAGVHIKL	1100	P	3	1658		1	0.000123237	87.439	81.837	59.628	-1.6792	2097600000	284	59.6283	1	1	1	87.439	61.488	70.718	1	44.1613	0.000869072	57.902	1	45.9408	0.0082099	45.941	1	41.7627	0.00187442	58.08	0.999951	43.0736	0.000123237	87.439	0	0	NaN	NaN	NaN	NaN	NaN
P12277	112	P12277	P12277	Creatine kinase B-type	CKB	HGGYKPSDEHKTDLNPDNLQGGDDLDPNYVL	1101	P	3	1658		0.583815	0.0274068	44.632	41.831	44.632	2.3177	176230000	112	1.46988	NaN	NaN	0.583815	NaN	NaN	44.632	NaN	NaN	NaN	NaN	NaN	NaN	NaN	NaN	NaN	NaN	NaN	NaN	NaN	NaN	NaN	NaN	NaN	NaN	NaN	NaN	NaN	NaN	NaN
P12277	123	P12277	P12277	Creatine kinase B-type	CKB	TDLNPDNLQGGDDLDPNYVLSSRVRTGRSIR	1102	P	5	1658		0.997577	2.84993e-06	76.476	72.117	76.476	-0.68578	44521000	123	26.2144	0.99472	NaN	0.997577	55.101	NaN	76.476	0.99472	22.8022	3.19837e-05	55.101	NaN	NaN	NaN	NaN	NaN	NaN	NaN	NaN	NaN	NaN	NaN	NaN	NaN	NaN	NaN	NaN	NaN	NaN	NaN
P12277	378	P12277	P12277	Creatine kinase B-type	CKB	MEQRLEQGQAIDDLMPAQK____________	1103	P	3	1658		1	0.00325999	48.229	41.354	48.229	0.67373	0	378	48.2287	NaN	1	NaN	NaN	48.229	NaN	NaN	NaN	NaN	NaN	NaN	NaN	NaN	NaN	NaN	NaN	NaN	NaN	NaN	NaN	NaN	NaN	NaN	NaN	NaN	NaN	NaN	NaN	NaN
P12277	21	P12277	P12277	Creatine kinase B-type	CKB	SHNALKLRFPAEDEFPDLSAHNNHMAKVLTP	1104	P	5	1658		0.999962	0.0136046	47.047	44.505	47.047	-1.1111	1742600	21	44.2061	NaN	0.999962	NaN	NaN	47.047	NaN	NaN	NaN	NaN	NaN	NaN	NaN	NaN	NaN	NaN	NaN	NaN	NaN	NaN	NaN	NaN	NaN	NaN	NaN	NaN	NaN	NaN	NaN	NaN
P12277	197	P12277	P12277	Creatine kinase B-type	CKB	AEQQQLIDDHFLFDKPVSPLLLASGMARDWP	1105	P	3	1658		0.832589	1.74537e-06	57.025	43.972	57.025	-2.6715	0	197	5.99157	NaN	0.832589	NaN	NaN	57.025	NaN	NaN	NaN	NaN	NaN	NaN	NaN	NaN	NaN	NaN	NaN	NaN	NaN	NaN	NaN	NaN	NaN	NaN	NaN	NaN	NaN	NaN	NaN	NaN
P12277	200	P12277	P12277	Creatine kinase B-type	CKB	QQLIDDHFLFDKPVSPLLLASGMARDWPDAR	1106	P	5	1658		0.995675	6.50995e-73	205.72	205.72	112.65	-2.7537	1233100000	200	23.5178	0.99114	0.995675	0.978338	136.43	145.64	205.72	0.931904	11.033	2.17891e-08	63.008	NaN	NaN	NaN	NaN	0.99114	20.4871	1.77247e-14	136.43	NaN	NaN	NaN	NaN	NaN	NaN	NaN	NaN	NaN	NaN	NaN
P12277	212	P12277	P12277	Creatine kinase B-type	CKB	PVSPLLLASGMARDWPDARGIWHNDNKTFLV	1107	P	5	1658		0.993761	7.36639e-35	160.9	156.32	123.95	-0.089673	916810000	212	21.897	0.931904	0.993761	0.983565	77.766	145.64	160.9	0.931904	11.033	2.17891e-08	63.008	0.908253	10.5574	7.96012e-08	77.766	NaN	NaN	NaN	NaN	NaN	NaN	NaN	NaN	NaN	NaN	NaN	NaN	NaN	NaN	NaN
P12277	48	P12277	P12277	Creatine kinase B-type	CKB	VLTPELYAELRAKSTPSGFTLDDVIQTGVDN	1108	P	4	1658		0.79509	5.4411e-08	55.919	52.35	49.806	-0.38579	158290000	48	8.89883	0.764472	0.775693	0.79509	55.919	49.806	49.806	NaN	NaN	NaN	NaN	NaN	NaN	NaN	NaN	NaN	NaN	NaN	NaN	NaN	NaN	NaN	NaN	0.764472	8.12349	5.4411e-08	55.919	NaN	NaN	NaN
P12532	233	P12532	P12532	Creatine kinase U-type, mitochondrial	CKMT1A	QQLIDDHFLFDKPVSPLLTAAGMARDWPDAR	1109	P	3	1660		0.972902	2.29709e-06	111.79	111.79	111.79	-0.12013	101340000	233	15.5514	NaN	0.855481	0.972902	NaN	109.09	111.79	NaN	NaN	NaN	NaN	NaN	NaN	NaN	NaN	NaN	NaN	NaN	NaN	NaN	NaN	NaN	NaN	NaN	NaN	NaN	NaN	NaN	NaN	NaN
P12694	170	P12694	P12694	2-oxoisovalerate dehydrogenase subunit alpha, mitochondrial	BCKDHA	FGQYREAGVLMYRDYPLELFMAQCYGNISDL	1110	P	3	1661		1	0.000130227	109.55	98.648	109.55	-0.35913	54611000	170	109.551	NaN	1	NaN	NaN	109.55	NaN	NaN	NaN	NaN	NaN	NaN	NaN	NaN	NaN	NaN	NaN	NaN	NaN	NaN	NaN	NaN	NaN	NaN	NaN	NaN	NaN	NaN	NaN	NaN
P12814	591	P12814	P12814	Alpha-actinin-1	ACTN1	SKIVQTYHVNMAGTNPYTTITPQEINGKWDH	1111	P	5	1664		0.999469	0.00329875	41.661	36.947	41.661	1.3906	289830000	591	32.7483	0.997923	0.999469	NaN	40.764	41.661	NaN	0.997923	26.816	0.00360042	40.764	NaN	NaN	NaN	NaN	NaN	NaN	NaN	NaN	NaN	NaN	NaN	NaN	NaN	NaN	NaN	NaN	NaN	NaN	NaN
P12931	302	P12931	P12931	Proto-oncogene tyrosine-protein kinase Src	SRC	GTWNGTTRVAIKTLKPGTMSPEAFLQEAQVM	1112	P	4	1666		0.829417	0.00016399	75.358	75.358	75.358	0.78232	37094000	302	6.8684	NaN	0.829417	NaN	NaN	75.358	NaN	NaN	NaN	NaN	NaN	NaN	NaN	NaN	NaN	NaN	NaN	NaN	NaN	NaN	NaN	NaN	NaN	NaN	NaN	NaN	NaN	NaN	NaN	NaN
P12931	307	P12931	P12931	Proto-oncogene tyrosine-protein kinase Src	SRC	TTRVAIKTLKPGTMSPEAFLQEAQVMKKLRH	1113	P	3	1666		0.559963	0.00145527	65.25	60.897	65.25	-0.76687	27097000	307	1.0467	NaN	0.559963	NaN	NaN	65.25	NaN	NaN	NaN	NaN	NaN	NaN	NaN	NaN	NaN	NaN	NaN	NaN	NaN	NaN	NaN	NaN	NaN	NaN	NaN	NaN	NaN	NaN	NaN	NaN
P12955	327	P12955	P12955	Xaa-Pro dipeptidase	PEPD	SSRAVMGAMKPGVWWPDMHRLADRIHLEELA	1114	P	4	1667		0.80056	0.00934854	50.653	50.653	50.653	-1.7602	178770000	327	6.64791	NaN	0.80056	NaN	NaN	50.653	NaN	NaN	NaN	NaN	NaN	NaN	NaN	NaN	NaN	NaN	NaN	NaN	NaN	NaN	NaN	NaN	NaN	NaN	NaN	NaN	NaN	NaN	NaN	NaN
P12955	7	P12955	P12955	Xaa-Pro dipeptidase	PEPD	_________MAAATGPSFWLGNETLKVPLAL	1115	P	2	1667		1	0.00415353	53.528	29.923	53.528	2.9686	0	7	53.5279	NaN	1	NaN	NaN	53.528	NaN	NaN	NaN	NaN	NaN	NaN	NaN	NaN	NaN	NaN	NaN	NaN	NaN	NaN	NaN	NaN	NaN	NaN	NaN	NaN	NaN	NaN	NaN	NaN
P12956	59	P12956	P12956	X-ray repair cross-complementing protein 6	XRCC6	ASKAMFESQSEDELTPFDMSIQCIQSVYISK	1116	P	3	1668		1	0.000598003	56.783	54.727	56.783	-0.85349	90247000	59	56.7834	1	NaN	1	48.337	NaN	56.783	NaN	NaN	NaN	NaN	NaN	NaN	NaN	NaN	NaN	NaN	NaN	NaN	NaN	NaN	NaN	NaN	NaN	NaN	NaN	NaN	1	48.3369	0.00238436
P12956	352	P12956	P12956	X-ray repair cross-complementing protein 6	XRCC6	LKRFDDPGLMLMGFKPLVLLKKHHYLRPSLF	1117	P	3	1668		0.568744	0.0330229	41.695	30.58	41.695	-1.1316	137680000	352	1.20181	0.568744	NaN	NaN	41.695	NaN	NaN	0.568744	1.20181	0.0330229	41.695	NaN	NaN	NaN	NaN	NaN	NaN	NaN	NaN	0	0	NaN	NaN	NaN	NaN	NaN	NaN	NaN	NaN	NaN
P12956	509	P12956	P12956	X-ray repair cross-complementing protein 6	XRCC6	ALDLMEPEQAVDLTLPKVEAMNKRLGSLVDE	1118	P	3	1668		0.999986	0.000168922	113.5	98.845	101.49	1.1673	128230000	509	48.6706	NaN	NaN	0.999986	NaN	NaN	113.5	NaN	NaN	NaN	NaN	NaN	NaN	NaN	NaN	NaN	NaN	NaN	NaN	NaN	NaN	NaN	NaN	NaN	NaN	NaN	NaN	NaN	NaN	NaN
P13010	506	P13010	P13010	X-ray repair cross-complementing protein 5	XRCC5	FQCLLHRALHPREPLPPIQQHIWNMLNPPAE	1119	P	3	1669		0.996592	2.6914e-05	89.466	79.473	65.454	0.26953	8166100000	506	26.5209	0.996515	0.996592	0.976481	78.3	89.466	63.491	0.951868	15.4674	5.56683e-05	71.927	0.980307	18.652	0.00217385	49.577	0.996515	26.6793	4.66398e-05	78.3	0.867631	9.58332	0.000257298	62.303	NaN	NaN	NaN	NaN	NaN	NaN	NaN
P13010	507	P13010	P13010	X-ray repair cross-complementing protein 5	XRCC5	QCLLHRALHPREPLPPIQQHIWNMLNPPAEV	1120	P	3	1669		0.998643	2.6914e-05	89.466	79.473	65.454	0.26953	11703000000	507	32.3802	0.996603	0.998643	0.976481	78.3	89.466	74.364	0.968705	17.2405	5.56683e-05	71.927	0.983918	18.652	0.00217385	49.577	0.996603	26.6793	4.66398e-05	78.3	0.983114	20.505	0.000257298	62.303	NaN	NaN	NaN	NaN	NaN	NaN	NaN
P13010	518	P13010	P13010	X-ray repair cross-complementing protein 5	XRCC5	EPLPPIQQHIWNMLNPPAEVTTKSQIPLSKI	1121	P	3	1669		0.861164	0.000136454	69.088	64.121	69.088	0.22138	1295800000	518	8.09746	0.861164	0.831685	0	69.088	62.284	NaN	0	0	NaN	NaN	NaN	NaN	NaN	NaN	0.861164	8.09746	0.000136454	69.088	NaN	NaN	NaN	NaN	NaN	NaN	NaN	NaN	NaN	NaN	NaN
P13010	519	P13010	P13010	X-ray repair cross-complementing protein 5	XRCC5	PLPPIQQHIWNMLNPPAEVTTKSQIPLSKIK	1122	P	3	1669		0.82773	0.000136454	69.088	64.121	62.284	0.43844	1295800000	519	8.18803	0.809079	0.82773	0	69.088	62.284	NaN	0	0	NaN	NaN	NaN	NaN	NaN	NaN	0.809079	8.09746	0.000136454	69.088	NaN	NaN	NaN	NaN	NaN	NaN	NaN	NaN	NaN	NaN	NaN
P13010	425	P13010	P13010	X-ray repair cross-complementing protein 5	XRCC5	PHIKHNYECLVYVQLPFMEDLRQYMFSSLKN	1123	P	4	1669		1	1.84918e-05	88.517	82.974	71.882	0.66483	728660000	425	71.8823	1	1	1	80.847	88.517	75.529	1	80.8473	8.71761e-05	80.847	NaN	NaN	NaN	NaN	NaN	NaN	NaN	NaN	NaN	NaN	NaN	NaN	NaN	NaN	NaN	NaN	NaN	NaN	NaN
P13073	36	P13073	P13073	Cytochrome c oxidase subunit 4 isoform 1, mitochondrial	COX4I1	VRAHESVVKSEDFSLPAYMDRRDHPLPEVAH	1124	P	5	1672		1	1.67789e-05	126.1	105.99	59.512	0.019205	2110900000	36	59.512	1	1	1	125.51	50.425	126.1	NaN	NaN	NaN	NaN	NaN	NaN	NaN	NaN	1	125.515	1.67789e-05	125.51	NaN	NaN	NaN	NaN	NaN	NaN	NaN	NaN	NaN	NaN	NaN
P13073	45	P13073	P13073	Cytochrome c oxidase subunit 4 isoform 1, mitochondrial	COX4I1	SEDFSLPAYMDRRDHPLPEVAHVKHLSASQK	1125	P	6	1672		0.887189	0.00181781	55.734	50.604	47.058	0.24975	4766100000	45	10.1223	0.868286	0.693505	0.887189	51.175	50.055	55.734	NaN	NaN	NaN	NaN	NaN	NaN	NaN	NaN	0.868286	10.7228	0.00771743	42.322	NaN	NaN	NaN	NaN	NaN	NaN	NaN	NaN	0.812296	8.85008	0.00737078
P13164	13	P13164	P13164	Interferon-induced transmembrane protein 1	IFITM1	___MHKEEHEVAVLGPPPSTILPRSTVINIH	1126	P	4	1673		0.994832	0.002103	59.512	55.918	59.512	0.064513	2122200000	13	23.0313	0.994832	0.992985	0.992591	59.512	50.883	59.512	0.989613	20.3364	0.0273523	42.711	0.961958	14.2253	0.00735038	49.973	0.994832	23.0313	0.002103	59.512	NaN	NaN	NaN	NaN	NaN	NaN	NaN	NaN	NaN	NaN	NaN
P13489	249	P13489	P13489	Ribonuclease inhibitor	RNH1	LGSNKLGDVGMAELCPGLLHPSSRLRTLWIW	1127	P	3	1678		0.993843	0.00950213	50.87	47.029	43.764	-1.2256	127880000	249	22.0794	NaN	0.993843	NaN	NaN	50.87	NaN	NaN	NaN	NaN	NaN	NaN	NaN	NaN	NaN	NaN	NaN	NaN	NaN	NaN	NaN	NaN	NaN	NaN	NaN	NaN	NaN	NaN	NaN	NaN
P13591	615	P13591	P13591	Neural cell adhesion molecule 1	NCAM1	ASEFKTQPVQGEPSAPKLEGQMGEDGNSIKV	1128	P	4	1680		0.942671	3.88814e-06	58.49	52.691	58.49	1.3252	114080000	615	12.4554	0.942671	0.765199	NaN	58.49	56.864	NaN	0.942671	12.4554	3.88814e-06	58.49	0.904694	10.0442	9.3493e-06	52.345	NaN	NaN	NaN	NaN	NaN	NaN	NaN	NaN	NaN	NaN	NaN	NaN	NaN	NaN	NaN
P13639	780	P13639	P13639	Elongation factor 2	EEF2	RKRGHVFEESQVAGTPMFVVKAYLPVNESFG	1129	P	4	1684		1	3.67783e-12	170.49	128.4	45.608	-1.2041	13307000000	780	45.6082	1	1	1	107.65	99.273	170.49	1	71.0731	0.00153312	72.21	1	69.7632	0.00107375	69.763	1	73.9837	0.0127756	73.984	1	107.654	0.000180527	107.65	1	45.6082	0.000892914	93.371	1	44.0888	0.0357904
P13639	752	P13639	P13639	Elongation factor 2	EEF2	QPRLMEPIYLVEIQCPEQVVGGIYGVLNRKR	1130	P	3	1684		0.996899	0.00175633	53.475	43.505	53.475	-0.36703	24718000	752	25.0714	NaN	0.996899	NaN	NaN	53.475	NaN	NaN	NaN	NaN	NaN	NaN	NaN	NaN	NaN	NaN	NaN	NaN	NaN	NaN	NaN	NaN	NaN	NaN	NaN	NaN	NaN	NaN	NaN	NaN
P13639	345	P13639	P13639	Elongation factor 2	EEF2	KEGKPLLKAVMRRWLPAGDALLQMITIHLPS	1131	P	2	1684		1	8.45528e-68	227	207.18	227	-0.17169	3381100000	345	195.68	1	1	1	227	207.92	153.48	NaN	NaN	NaN	NaN	0.999999	60.9652	0.000598736	67.33	1	195.68	0	227	NaN	NaN	NaN	NaN	NaN	NaN	NaN	NaN	NaN	NaN	NaN
P13639	393	P13639	P13639	Elongation factor 2	EEF2	DDEAAMGIKSCDPKGPLMMYISKMVPTSDKG	1132	P	2	1684		0.999585	0.0329215	85.672	85.672	85.672	-0.11894	32863000	393	33.6938	0.999585	NaN	NaN	85.672	NaN	NaN	0.999585	33.6938	0.0329215	85.672	NaN	NaN	NaN	NaN	NaN	NaN	NaN	NaN	NaN	NaN	NaN	NaN	NaN	NaN	NaN	NaN	NaN	NaN	NaN
P13639	532	P13639	P13639	Elongation factor 2	EEF2	LPKLVEGLKRLAKSDPMVQCIIEESGEHIIA	1133	P	4	1684		1	7.48408e-06	114.12	108.86	114.12	-0.57098	83942000	532	114.123	1	NaN	1	114.12	NaN	100.06	NaN	NaN	NaN	NaN	NaN	NaN	NaN	NaN	NaN	NaN	NaN	NaN	NaN	NaN	NaN	NaN	NaN	NaN	NaN	NaN	1	114.123	7.48408e-06
P13639	810	P13639	P13639	Elongation factor 2	EEF2	GFTADLRSNTGGQAFPQCVFDHWQILPGDPF	1134	P	4	1684		0.99964	1.06462e-08	63.282	57.968	63.282	-1.3273	554450000	810	33.9224	0.99964	0.979537	0.989725	63.282	51.848	57.832	NaN	NaN	NaN	NaN	0.999635	34.3615	7.89758e-06	56.864	NaN	NaN	NaN	NaN	0.99964	33.9224	1.06462e-08	63.282	NaN	NaN	NaN	NaN	NaN	NaN	NaN
P13639	821	P13639	P13639	Elongation factor 2	EEF2	GQAFPQCVFDHWQILPGDPFDNSSRPSQVVA	1135	P	4	1684		0.998453	1.06462e-08	63.282	57.968	56.864	1.316	515240000	821	28.0887	0.998453	NaN	0.951505	63.282	NaN	57.832	NaN	NaN	NaN	NaN	0.998453	28.0887	7.89758e-06	56.864	NaN	NaN	NaN	NaN	0.944456	12.0405	1.06462e-08	63.282	NaN	NaN	NaN	NaN	NaN	NaN	NaN
P13639	824	P13639	P13639	Elongation factor 2	EEF2	FPQCVFDHWQILPGDPFDNSSRPSQVVAETR	1136	P	4	1684		0.998453	1.06462e-08	63.282	57.968	56.864	1.316	515240000	824	28.0887	0.998453	NaN	NaN	63.282	NaN	NaN	NaN	NaN	NaN	NaN	0.998453	28.0887	7.89758e-06	56.864	NaN	NaN	NaN	NaN	0.944456	12.0405	1.06462e-08	63.282	NaN	NaN	NaN	NaN	NaN	NaN	NaN
P13639	460	P13639	P13639	Elongation factor 2	EEF2	KPIQRTILMMGRYVEPIEDVPCGNIVGLVGV	1137	P	3	1684		0.866879	0.00252398	50.492	45.385	50.492	1.3951	4498600	460	8.1371	NaN	0.866879	NaN	NaN	50.492	NaN	NaN	NaN	NaN	NaN	NaN	NaN	NaN	NaN	NaN	NaN	NaN	NaN	NaN	NaN	NaN	NaN	NaN	NaN	NaN	NaN	NaN	NaN	NaN
P13639	465	P13639	P13639	Elongation factor 2	EEF2	TILMMGRYVEPIEDVPCGNIVGLVGVDQFLV	1138	P	2	1684		0.999959	0.00213968	102.64	92.44	102.64	1.3515	30036000	465	43.8225	NaN	0.999959	NaN	NaN	102.64	NaN	NaN	NaN	NaN	NaN	NaN	NaN	NaN	NaN	NaN	NaN	NaN	NaN	NaN	NaN	NaN	NaN	NaN	NaN	NaN	NaN	NaN	NaN	NaN
P13667	89	P13667	P13667	Protein disulfide-isomerase A4	PDIA4	NFVADKDTVLLEFYAPWCGHCKQFAPEYEKI	1139	P	2	1685		1	8.18883e-21	196.76	184.2	108.7	-0.82073	1330700000	89	108.697	1	1	1	170.52	170.52	196.76	NaN	NaN	NaN	NaN	NaN	NaN	NaN	NaN	NaN	NaN	NaN	NaN	NaN	NaN	NaN	NaN	1	71.3439	7.29225e-06	170.52	1	71.6917	0.00290635
P13667	553	P13667	P13667	Protein disulfide-isomerase A4	PDIA4	IVMDPKKDVLIEFYAPWCGHCKQLEPVYNSL	1140	P	4	1685	+	1	0.023591	55.841	52.2	46.249	-1.1033	88511000	553	46.2485	1	NaN	1	55.841	NaN	46.249	NaN	NaN	NaN	NaN	1	55.8408	0.023591	55.841	NaN	NaN	NaN	NaN	1	49.4629	0.03391	49.463	NaN	NaN	NaN	NaN	NaN	NaN	NaN
P13674	154	P13674	P13674	Prolyl 4-hydroxylase subunit alpha-1	P4HA1	DTYNLDTDTISKGNLPGVKHKSFLTAEDCFE	1141	P	2	1686		1	0.000522157	97.767	85.601	97.767	0.92672	13589000	154	97.7666	NaN	1	NaN	NaN	97.767	NaN	NaN	NaN	NaN	NaN	NaN	NaN	NaN	NaN	NaN	NaN	NaN	NaN	NaN	NaN	NaN	NaN	NaN	NaN	NaN	NaN	NaN	NaN	NaN
P13693	113	P13693	P13693	Translationally-controlled tumor protein	TPT1	SIKGKLEEQRPERVKPFMTGAAEQIKHILAN	1142	P	4	1687		1	0.00189741	70.907	67.716	70.907	0.34194	473950000	113	70.9069	1	NaN	NaN	70.907	NaN	NaN	NaN	NaN	NaN	NaN	NaN	NaN	NaN	NaN	1	70.9069	0.00189741	70.907	NaN	NaN	NaN	NaN	NaN	NaN	NaN	NaN	NaN	NaN	NaN
P13796	148	P13796	P13796	Plastin-2	LCP1	ALENDPDCRHVIPMNPNTNDLFNAVGDGIVL	1143	P	4	1690		0.587258	6.07014e-05	102.17	97.245	102.17	-0.75751	148100000	148	1.59955	NaN	NaN	0.587258	NaN	NaN	102.17	NaN	NaN	NaN	NaN	NaN	NaN	NaN	NaN	NaN	NaN	NaN	NaN	NaN	NaN	NaN	NaN	NaN	NaN	NaN	NaN	NaN	NaN	NaN
P13796	436	P13796	P13796	Plastin-2	LCP1	SDALVIFQLYEKIKVPVDWNRVNKPPYPKLG	1144	P	4	1690		1	0.000813997	57.351	52.395	57.351	-4.3679	106080000	436	57.3506	NaN	NaN	1	NaN	NaN	57.351	NaN	NaN	NaN	NaN	NaN	NaN	NaN	NaN	NaN	NaN	NaN	NaN	NaN	NaN	NaN	NaN	NaN	NaN	NaN	NaN	NaN	NaN	NaN
P13797	148	P13797	P13797	Plastin-3	PLS3	INKALENDPDCRHVIPMNPNTDDLFKAVGDG	1145	P	2	1691		0.9999	3.89508e-08	124.42	102.39	116.54	-0.39789	1725200000	148	40.0161	0.999862	0.9999	0.998204	124.42	116.54	119.17	NaN	NaN	NaN	NaN	NaN	NaN	NaN	NaN	0.999862	38.61	0.0137307	124.42	NaN	NaN	NaN	NaN	0.958823	13.986	0.00383387	69.72	NaN	NaN	NaN
P13797	378	P13797	P13797	Plastin-3	PLS3	PKLNLAFVANLFNKYPALTKPENQDIDWTLL	1146	P	3	1691		1	8.11557e-05	84.067	75.869	80.418	0.081991	337830000	378	80.4184	1	1	NaN	84.067	78.415	NaN	NaN	NaN	NaN	NaN	NaN	NaN	NaN	NaN	1	80.4184	0.000195089	84.067	NaN	NaN	NaN	NaN	NaN	NaN	NaN	NaN	NaN	NaN	NaN
P13797	383	P13797	P13797	Plastin-3	PLS3	AFVANLFNKYPALTKPENQDIDWTLLEGETR	1147	P	3	1691		1	8.11557e-05	84.067	75.869	80.418	0.081991	353390000	383	80.4184	1	1	0.824069	84.067	78.415	51.323	NaN	NaN	NaN	NaN	NaN	NaN	NaN	NaN	1	80.4184	0.000195089	84.067	NaN	NaN	NaN	NaN	NaN	NaN	NaN	NaN	NaN	NaN	NaN
P13797	414	P13797	P13797	Plastin-3	PLS3	EERTFRNWMNSLGVNPHVNHLYADLQDALVI	1148	P	5	1691		1	7.09375e-16	145.62	138.33	54.583	0.35754	1807500000	414	54.5826	NaN	1	1	NaN	115.39	145.62	NaN	NaN	NaN	NaN	NaN	NaN	NaN	NaN	NaN	NaN	NaN	NaN	NaN	NaN	NaN	NaN	NaN	NaN	NaN	NaN	NaN	NaN	NaN
P13797	564	P13797	P13797	Plastin-3	PLS3	ISSSLAVVDLIDAIQPGCINYDLVKSGNLTE	1149	P	3	1691		1	0.000137011	81.65	75.286	81.65	2.5844	28424000	564	81.6499	1	NaN	NaN	81.65	NaN	NaN	NaN	NaN	NaN	NaN	NaN	NaN	NaN	NaN	NaN	NaN	NaN	NaN	NaN	NaN	NaN	NaN	1	81.6499	0.000137011	81.65	NaN	NaN	NaN
P13804	324	P13804	P13804	Electron transfer flavoprotein subunit alpha, mitochondrial	ETFA	QVADYGIVADLFKVVPEMTEILKKK______	1150	P	3	1693		1	9.73732e-125	239.09	234.34	235.05	1.1758	3418700000	324	154.453	NaN	1	1	NaN	235.05	239.09	NaN	NaN	NaN	NaN	NaN	NaN	NaN	NaN	NaN	NaN	NaN	NaN	NaN	NaN	NaN	NaN	NaN	NaN	NaN	NaN	NaN	NaN	NaN
P13995	314	P13995	P13995	Bifunctional methylenetetrahydrofolate dehydrogenase/cyclohydrolase, mitochondrial;NAD-dependent methylenetetrahydrofolate dehydrogenase;Methenyltetrahydrofolate cyclohydrolase	MTHFD2	RQKAGYITPVPGGVGPMTVAMLMKNTIIAAK	1151	P	2	1701		0.999947	4.40066e-10	136.14	116.03	136.14	-0.23859	985840000	314	42.7882	0.997907	0.999947	0.996412	107.69	136.14	65.085	0.944841	12.5737	0.00262341	58.49	0.997907	26.7827	7.96764e-06	107.69	0.973836	15.7711	0.000639055	66.264	NaN	NaN	NaN	NaN	NaN	NaN	NaN	NaN	NaN	NaN	NaN
P13995	174	P13995	P13995	Bifunctional methylenetetrahydrofolate dehydrogenase/cyclohydrolase, mitochondrial;NAD-dependent methylenetetrahydrofolate dehydrogenase;Methenyltetrahydrofolate cyclohydrolase	MTHFD2	VINVGRMCLDQYSMLPATPWGVWEIIKRTGI	1152	P	3	1701		1	0.000769957	51.526	48.036	51.526	0.47391	19713000	174	51.5262	NaN	1	NaN	NaN	51.526	NaN	NaN	NaN	NaN	NaN	NaN	NaN	NaN	NaN	NaN	NaN	NaN	NaN	NaN	NaN	NaN	NaN	NaN	NaN	NaN	NaN	NaN	NaN	NaN
P13995	177	P13995	P13995	Bifunctional methylenetetrahydrofolate dehydrogenase/cyclohydrolase, mitochondrial;NAD-dependent methylenetetrahydrofolate dehydrogenase;Methenyltetrahydrofolate cyclohydrolase	MTHFD2	VGRMCLDQYSMLPATPWGVWEIIKRTGIPTL	1153	P	3	1701		1	0.000769957	51.526	48.036	51.526	0.47391	19713000	177	51.5262	NaN	1	NaN	NaN	51.526	NaN	NaN	NaN	NaN	NaN	NaN	NaN	NaN	NaN	NaN	NaN	NaN	NaN	NaN	NaN	NaN	NaN	NaN	NaN	NaN	NaN	NaN	NaN	NaN
P13995	208	P13995	P13995	Bifunctional methylenetetrahydrofolate dehydrogenase/cyclohydrolase, mitochondrial;NAD-dependent methylenetetrahydrofolate dehydrogenase;Methenyltetrahydrofolate cyclohydrolase	MTHFD2	GKNVVVAGRSKNVGMPIAMLLHTDGAHERPG	1154	P	5	1701		0.988728	0.000355523	53.266	53.266	53.266	0.48768	7955200	208	19.7216	0.988728	NaN	NaN	53.266	NaN	NaN	NaN	NaN	NaN	NaN	NaN	NaN	NaN	NaN	0.988728	19.7216	0.000355523	53.266	NaN	NaN	NaN	NaN	NaN	NaN	NaN	NaN	NaN	NaN	NaN
P13995	222	P13995	P13995	Bifunctional methylenetetrahydrofolate dehydrogenase/cyclohydrolase, mitochondrial;NAD-dependent methylenetetrahydrofolate dehydrogenase;Methenyltetrahydrofolate cyclohydrolase	MTHFD2	MPIAMLLHTDGAHERPGGDATVTISHRYTPK	1155	P	6	1701		0.978024	0.00149906	43.31	36.876	43.31	2.0736	53720000	222	16.484	NaN	0.978024	NaN	NaN	43.31	NaN	NaN	NaN	NaN	NaN	NaN	NaN	NaN	NaN	NaN	NaN	NaN	NaN	NaN	NaN	NaN	NaN	NaN	NaN	NaN	NaN	NaN	NaN	NaN
P14174	2	P14174	P14174	Macrophage migration inhibitory factor	MIF	______________MPMFIVNTNVPRASVPD	1156	P	2	1702		1	0.000863314	116.05	95.18	116.05	0.21243	939110000	2	103.095	1	1	1	81.525	116.05	98.033	NaN	NaN	NaN	NaN	0.999989	49.4659	0.0097651	52.579	1	73.4866	0.00103489	76.465	1	78.5857	0.00103928	81.525	NaN	NaN	NaN	NaN	NaN	NaN	NaN
P14314	443	P14314	P14314	Glucosidase 2 subunit beta	PRKCSH	CPFKLVSQKPKLGGSPTSLGTWGSWIGPDHD	1157	P	3	1704		1	0.018564	40.756	20.78	40.756	1.2681	39193000	443	40.7557	NaN	1	NaN	NaN	40.756	NaN	NaN	NaN	NaN	NaN	NaN	NaN	NaN	NaN	NaN	NaN	NaN	NaN	NaN	NaN	NaN	NaN	NaN	NaN	NaN	NaN	NaN	NaN	NaN
P14314	455	P14314	P14314	Glucosidase 2 subunit beta	PRKCSH	GGSPTSLGTWGSWIGPDHDKFSAMKYEQGTG	1158	P	3	1704		1	4.05171e-08	86.081	81.208	40.756	1.2681	197850000	455	40.7557	NaN	1	0.999977	NaN	85.203	86.081	NaN	NaN	NaN	NaN	NaN	NaN	NaN	NaN	NaN	NaN	NaN	NaN	NaN	NaN	NaN	NaN	NaN	NaN	NaN	NaN	NaN	NaN	NaN
P14324	102	P14324	P14324	Farnesyl pyrophosphate synthase	FDPS	FSQIVRVLTEDEMGHPEIGDAIARLKEVLEY	1159	P	3	1706		1	0.00223452	71.558	66.656	71.558	-0.1854	4607500000	102	71.5582	NaN	NaN	1	NaN	NaN	71.558	NaN	NaN	NaN	NaN	NaN	NaN	NaN	NaN	NaN	NaN	NaN	NaN	NaN	NaN	NaN	NaN	NaN	NaN	NaN	NaN	NaN	NaN	NaN
P14373	264	P14373	P14373	Zinc finger protein RFP	TRIM27	QDIGDTLSRAERIRIPEPWITPPDLQEKIHI	1160	P	5	1707		0.90537	0.00566059	44.632	37.757	44.632	-0.95715	34761000	264	10.967	0.90537	NaN	NaN	44.632	NaN	NaN	NaN	NaN	NaN	NaN	0.90537	10.967	0.00566059	44.632	NaN	NaN	NaN	NaN	NaN	NaN	NaN	NaN	NaN	NaN	NaN	NaN	NaN	NaN	NaN
P14373	266	P14373	P14373	Zinc finger protein RFP	TRIM27	IGDTLSRAERIRIPEPWITPPDLQEKIHIFA	1161	P	5	1707		0.973771	0.00566059	44.632	37.757	44.632	-0.95715	34761000	266	18.8288	0.973771	NaN	NaN	44.632	NaN	NaN	NaN	NaN	NaN	NaN	0.973771	18.8288	0.00566059	44.632	NaN	NaN	NaN	NaN	NaN	NaN	NaN	NaN	NaN	NaN	NaN	NaN	NaN	NaN	NaN
P14550	223	P14550	P14550	Alcohol dehydrogenase [NADP(+)]	AKR1A1	TAYSPLGSSDRAWRDPDEPVLLEEPVVLALA	1162	P	3	1712		0.999997	0.017931	61.222	54.11	61.222	0.9238	76790000	223	55.0595	NaN	0.999997	NaN	NaN	61.222	NaN	NaN	NaN	NaN	NaN	NaN	NaN	NaN	NaN	NaN	NaN	NaN	NaN	NaN	NaN	NaN	NaN	NaN	NaN	NaN	NaN	NaN	NaN	NaN
P14550	226	P14550	P14550	Alcohol dehydrogenase [NADP(+)]	AKR1A1	SPLGSSDRAWRDPDEPVLLEEPVVLALAEKY	1163	P	3	1712		0.999997	0.017931	61.222	54.11	61.222	0.9238	76790000	226	55.0595	NaN	0.999997	NaN	NaN	61.222	NaN	NaN	NaN	NaN	NaN	NaN	NaN	NaN	NaN	NaN	NaN	NaN	NaN	NaN	NaN	NaN	NaN	NaN	NaN	NaN	NaN	NaN	NaN	NaN
P14550	283	P14550	P14550	Alcohol dehydrogenase [NADP(+)]	AKR1A1	SRILQNIKVFDFTFSPEEMKQLNALNKNWRY	1164	P	3	1712		1	0.000552816	93.006	85.363	93.006	1.1	12346000	283	93.0059	NaN	1	NaN	NaN	93.006	NaN	NaN	NaN	NaN	NaN	NaN	NaN	NaN	NaN	NaN	NaN	NaN	NaN	NaN	NaN	NaN	NaN	NaN	NaN	NaN	NaN	NaN	NaN	NaN
P14550	301	P14550	P14550	Alcohol dehydrogenase [NADP(+)]	AKR1A1	MKQLNALNKNWRYIVPMLTVDGKRVPRDAGH	1165	P	2	1712		1	0.0311083	72.643	51.773	72.643	-2.009	0	301	72.6431	NaN	NaN	1	NaN	NaN	72.643	NaN	NaN	NaN	NaN	NaN	NaN	NaN	NaN	NaN	NaN	NaN	NaN	NaN	NaN	NaN	NaN	NaN	NaN	NaN	NaN	NaN	NaN	NaN
P14618	323	P14618	P14618	Pyruvate kinase PKM	PKM	LAQKMMIGRCNRAGKPVICATQMLESMIKKP	1166	P	3	1713		1	0.01801	65.949	49.83	47.64	-0.095111	129960000	323	47.6398	1	1	NaN	47.64	65.949	NaN	NaN	NaN	NaN	NaN	NaN	NaN	NaN	NaN	NaN	NaN	NaN	NaN	1	47.6398	0.01801	47.64	NaN	NaN	NaN	NaN	NaN	NaN	NaN
P14618	517	P14618	P14618	Pyruvate kinase PKM	PKM	FFKKGDVVIVLTGWRPGSGFTNTMRVVPVP_	1167	P	3	1713		1	2.43979e-06	105.92	98.212	81.949	1.1791	9203300000	517	81.9491	1	1	1	70.917	83.769	105.92	NaN	NaN	NaN	NaN	1	60.0318	0.0237655	60.032	1	70.9174	0.000784107	70.917	NaN	NaN	NaN	NaN	NaN	NaN	NaN	NaN	1	52.1694	0.00992379
P14618	471	P14618	P14618	Pyruvate kinase PKM	PKM	NPQTARQAHLYRGIFPVLCKDPVQEAWAEDV	1168	P	3	1713		1	0.00131444	58.861	49.64	45.22	0.3931	890970000	471	45.22	1	1	1	50.865	54.311	58.861	NaN	NaN	NaN	NaN	1	50.8649	0.00369289	50.865	NaN	NaN	NaN	NaN	NaN	NaN	NaN	NaN	NaN	NaN	NaN	NaN	NaN	NaN	NaN
P14618	477	P14618	P14618	Pyruvate kinase PKM	PKM	QAHLYRGIFPVLCKDPVQEAWAEDVDLRVNF	1169	P	3	1713		1	0.00131444	58.861	49.64	45.22	0.3931	909640000	477	45.22	1	1	1	50.865	54.311	58.861	NaN	NaN	NaN	NaN	1	50.8649	0.00369289	50.865	NaN	NaN	NaN	NaN	NaN	NaN	NaN	NaN	NaN	NaN	NaN	NaN	NaN	NaN	NaN
P14618	107	P14618	P14618	Pyruvate kinase PKM	PKM	RTATESFASDPILYRPVAVALDTKGPEIRTG	1170	P	4	1713		0.928754	0.000173906	72.569	66.474	72.569	-0.5164	26316000	107	11.1545	NaN	NaN	0.928754	NaN	NaN	72.569	NaN	NaN	NaN	NaN	NaN	NaN	NaN	NaN	NaN	NaN	NaN	NaN	NaN	NaN	NaN	NaN	NaN	NaN	NaN	NaN	NaN	NaN	NaN
P14625	617	P14625	P14625	Endoplasmin	HSP90B1	EKTKESREAVEKEFEPLLNWMKDKALKDKIE	1171	P	2	1715		1	0.0124923	96.334	76.657	96.334	-2.9807	0	617	96.3341	NaN	NaN	1	NaN	NaN	96.334	NaN	NaN	NaN	NaN	NaN	NaN	NaN	NaN	NaN	NaN	NaN	NaN	NaN	NaN	NaN	NaN	NaN	NaN	NaN	NaN	NaN	NaN	NaN
P14625	369	P14625	P14625	Endoplasmin	HSP90B1	EYKAFYKSFSKESDDPMAYIHFTAEGEVTFK	1172	P	3	1715	+	1	0.00219146	65.521	62.133	65.521	1.2869	11410000	369	65.5212	NaN	1	NaN	NaN	65.521	NaN	NaN	NaN	NaN	NaN	NaN	NaN	NaN	NaN	NaN	NaN	NaN	NaN	NaN	NaN	NaN	NaN	NaN	NaN	NaN	NaN	NaN	NaN	NaN
P14625	571	P14625	P14625	Endoplasmin	HSP90B1	ERLLKKGYEVIYLTEPVDEYCIQALPEFDGK	1173	P	3	1715		0.99996	0.000278397	74.579	68.075	74.579	-0.23865	27345000	571	43.9944	0.99996	NaN	NaN	74.579	NaN	NaN	NaN	NaN	NaN	NaN	NaN	NaN	NaN	NaN	NaN	NaN	NaN	NaN	NaN	NaN	NaN	NaN	0.99996	43.9944	0.000278397	74.579	0.999816	37.3513	0.000278397
P14625	427	P14625	P14625	Endoplasmin	HSP90B1	YVRRVFITDDFHDMMPKYLNFVKGVVDSDDL	1174	P	3	1715		1	0.00104774	91.62	71.611	57.434	-0.62958	4614500000	427	57.4342	1	1	1	51.771	91.62	82.069	NaN	NaN	NaN	NaN	NaN	NaN	NaN	NaN	NaN	NaN	NaN	NaN	NaN	NaN	NaN	NaN	1	51.7707	0.0340491	51.771	NaN	NaN	NaN
P14625	730	P14625	P14625	Endoplasmin	HSP90B1	VVLFETATLRSGYLLPDTKAYGDRIERMLRL	1175	P	3	1715		1	0.0353096	75.018	60.599	75.018	0.82995	89937000	730	75.0178	NaN	1	NaN	NaN	75.018	NaN	NaN	NaN	NaN	NaN	NaN	NaN	NaN	NaN	NaN	NaN	NaN	NaN	NaN	NaN	NaN	NaN	NaN	NaN	NaN	NaN	NaN	NaN	NaN
P14625	292	P14625	P14625	Endoplasmin	HSP90B1	FPIYVWSSKTETVEEPMEEEEAAKEEKEESD	1176	P	3	1715		1	0.000312534	126.19	118.36	122.01	-0.56145	178120000	292	122.009	1	NaN	1	126.19	NaN	122.01	NaN	NaN	NaN	NaN	NaN	NaN	NaN	NaN	NaN	NaN	NaN	NaN	NaN	NaN	NaN	NaN	NaN	NaN	NaN	NaN	1	126.189	0.000312534
P14635	378	P14635	P14635	G2/mitotic-specific cyclin-B1	CCNB1	PTLQHYLSYTEESLLPVMQHLAKNVVMVNQG	1177	P	3	1716		0.991016	2.8258e-05	63.085	57.286	63.085	-0.35496	46429000	378	20.4263	NaN	NaN	0.991016	NaN	NaN	63.085	NaN	NaN	NaN	NaN	NaN	NaN	NaN	NaN	NaN	NaN	NaN	NaN	NaN	NaN	NaN	NaN	NaN	NaN	NaN	NaN	NaN	NaN	NaN
P14649	129	P14649	P14649	Myosin light chain 6B	MYL6B	SDELKSRRVDFETFLPMLQAVAKNRGQGTYE	1178	P	4	1717		1	0.035501	50.053	41.052	50.053	0.63288	3640400	129	50.0528	1	NaN	NaN	50.053	NaN	NaN	NaN	NaN	NaN	NaN	NaN	NaN	NaN	NaN	NaN	NaN	NaN	NaN	NaN	NaN	NaN	NaN	1	50.0528	0.035501	50.053	NaN	NaN	NaN
P14678;P63162	238;238	P14678	P14678	Small nuclear ribonucleoprotein-associated proteins B and B';Small nuclear ribonucleoprotein-associated protein N	SNRPB;SNRPN	PPPGMRGPPPPGMRPPRP_____________	1179	P	2	1719		0.673072	0.0069444	71.223	7.9398	71.223	4.1381	20491000	238	1.26947	NaN	NaN	0.673072	NaN	NaN	71.223	NaN	NaN	NaN	NaN	NaN	NaN	NaN	NaN	NaN	NaN	NaN	NaN	NaN	NaN	NaN	NaN	NaN	NaN	NaN	NaN	NaN	NaN	NaN
P14678;P63162	240;240	P14678	P14678	Small nuclear ribonucleoprotein-associated proteins B and B';Small nuclear ribonucleoprotein-associated protein N	SNRPB;SNRPN	PGMRGPPPPGMRPPRP_______________	1180	P	2	1719		0.673072	0.0069444	71.223	7.9398	71.223	4.1381	20491000	240	1.26947	NaN	NaN	0.673072	NaN	NaN	71.223	NaN	NaN	NaN	NaN	NaN	NaN	NaN	NaN	NaN	NaN	NaN	NaN	NaN	NaN	NaN	NaN	NaN	NaN	NaN	NaN	NaN	NaN	NaN
P14735	548	P14735	P14735	Insulin-degrading enzyme	IDE	TNFEILPLEKEATPYPALIKDTAMSKLWFKQ	1181	P	4	1720		0.856759	0.00030248	58.11	43.58	58.11	-0.22967	218240000	548	7.88142	0.856759	NaN	NaN	58.11	NaN	NaN	NaN	NaN	NaN	NaN	NaN	NaN	NaN	NaN	0.856759	7.88142	0.00030248	58.11	NaN	NaN	NaN	NaN	NaN	NaN	NaN	NaN	NaN	NaN	NaN
P14854	66	P14854	P14854	Cytochrome c oxidase subunit 6B1	COX6B1	ISVCEWYQRVYQSLCPTSWVTDWDEQRAEGT	1182	P	3	1721		1	0.00508076	71.54	62.921	52.79	1.813	84859000	66	52.7904	1	1	NaN	71.54	56.947	NaN	NaN	NaN	NaN	NaN	NaN	NaN	NaN	NaN	NaN	NaN	NaN	NaN	1	71.5397	0.00508076	71.54	NaN	NaN	NaN	NaN	NaN	NaN	NaN
P14854	83	P14854	P14854	Cytochrome c oxidase subunit 6B1	COX6B1	SWVTDWDEQRAEGTFPGKI____________	1183	P	3	1721		1	0.00508076	71.54	62.921	52.79	1.813	34391000	83	52.7904	1	1	NaN	71.54	52.79	NaN	NaN	NaN	NaN	NaN	NaN	NaN	NaN	NaN	NaN	NaN	NaN	NaN	1	71.5397	0.00508076	71.54	NaN	NaN	NaN	NaN	NaN	NaN	NaN
P14859	277	P14859	P14859	POU domain, class 2, transcription factor 1	POU2F1	QTLPQSQSTPKRIDTPSLEEPSDLEELEQFA	1184	P	3	1722		1	0.0313073	48.112	10.733	48.112	-1.0556	71969000	277	48.1118	NaN	1	NaN	NaN	48.112	NaN	NaN	NaN	NaN	NaN	NaN	NaN	NaN	NaN	NaN	NaN	NaN	NaN	NaN	NaN	NaN	NaN	NaN	NaN	NaN	NaN	NaN	NaN	NaN
P14859	282	P14859	P14859	POU domain, class 2, transcription factor 1	POU2F1	SQSTPKRIDTPSLEEPSDLEELEQFAKTFKQ	1185	P	3	1722		1	0.0313073	48.112	10.733	48.112	-1.0556	71969000	282	48.1118	NaN	1	NaN	NaN	48.112	NaN	NaN	NaN	NaN	NaN	NaN	NaN	NaN	NaN	NaN	NaN	NaN	NaN	NaN	NaN	NaN	NaN	NaN	NaN	NaN	NaN	NaN	NaN	NaN
P14866	135	P14866	P14866	Heterogeneous nuclear ribonucleoprotein L	HNRNPL	EALQEFGPISYVVVMPKKRQALVEFEDVLGA	1186	P	4	1723		0.998765	0.00291118	43.936	38.88	41.562	1.4156	26720000	135	29.0779	NaN	NaN	0.998765	NaN	NaN	43.936	NaN	NaN	NaN	NaN	NaN	NaN	NaN	NaN	NaN	NaN	NaN	NaN	NaN	NaN	NaN	NaN	NaN	NaN	NaN	NaN	NaN	NaN	NaN
P14866	457	P14866	P14866	Heterogeneous nuclear ribonucleoprotein L	HNRNPL	NFMFGQKLNVCVSKQPAIMPGQSYGLEDGSC	1187	P	3	1723		0.997776	1.70854e-13	137.16	133.94	116.08	-0.99911	755710000	457	26.5196	0.997776	0.867481	0.987564	137.16	78.311	65.57	0.997776	26.5196	1.70854e-13	137.16	NaN	NaN	NaN	NaN	NaN	NaN	NaN	NaN	0.989858	19.8947	0.07342	46.66	NaN	NaN	NaN	NaN	NaN	NaN	NaN
P14866	461	P14866	P14866	Heterogeneous nuclear ribonucleoprotein L	HNRNPL	GQKLNVCVSKQPAIMPGQSYGLEDGSCSYKD	1188	P	3	1723		0.543947	0.0250005	48.656	45.318	41.521	-1.5157	56028000	461	0.765419	NaN	0.524559	0.543947	NaN	48.656	41.521	NaN	NaN	NaN	NaN	NaN	NaN	NaN	NaN	NaN	NaN	NaN	NaN	NaN	NaN	NaN	NaN	NaN	NaN	NaN	NaN	NaN	NaN	NaN
P14866	288	P14866	P14866	Heterogeneous nuclear ribonucleoprotein L	HNRNPL	LNVFKNDQDTWDYTNPNLSGQGDPGSNPNKR	1189	P	4	1723		0.99998	1.02316e-05	73.389	68.124	73.389	-1.0842	490570000	288	47.2557	0.999433	0.999876	0.99998	66.853	66.474	73.389	NaN	NaN	NaN	NaN	NaN	NaN	NaN	NaN	0.999433	33.748	0.000644823	51.9	0.99913	30.9351	0.00953235	66.853	NaN	NaN	NaN	NaN	NaN	NaN	NaN
P14866	419	P14866	P14866	Heterogeneous nuclear ribonucleoprotein L	HNRNPL	CLYGNVEKVKFMKSKPGAAMVEMADGYAVDR	1190	P	5	1723		1	4.00677e-05	115.15	104.49	48.697	-0.20562	29547000000	419	48.697	1	1	1	97.32	115.15	101.86	1	65.0223	0.000255716	97.32	1	71.5923	0.00278892	71.592	1	77.0782	0.00037415	92.993	1	58.0243	0.00992188	60.034	1	47.0473	0.000255716	95.814	1	48.697	0.000741246
P14866	570	P14866	P14866	Heterogeneous nuclear ribonucleoprotein L	HNRNPL	ALETLGFLNHYQMKNPNGPYPYTLKLCFSTA	1191	P	4	1723		0.962309	2.92238e-18	140.3	135.99	140.3	-0.20951	503550000	570	14.7387	NaN	0.962309	NaN	NaN	140.3	NaN	NaN	NaN	NaN	NaN	NaN	NaN	NaN	NaN	NaN	NaN	NaN	NaN	NaN	NaN	NaN	NaN	NaN	NaN	NaN	NaN	NaN	NaN	NaN
P14866	573	P14866	P14866	Heterogeneous nuclear ribonucleoprotein L	HNRNPL	TLGFLNHYQMKNPNGPYPYTLKLCFSTAQHA	1192	P	4	1723		0.816838	1.48275e-08	63.008	51.479	63.008	0.71651	172450000	573	5.59182	NaN	0.816838	NaN	NaN	63.008	NaN	NaN	NaN	NaN	NaN	NaN	NaN	NaN	NaN	NaN	NaN	NaN	NaN	NaN	NaN	NaN	NaN	NaN	NaN	NaN	NaN	NaN	NaN	NaN
P14866	371	P14866	P14866	Heterogeneous nuclear ribonucleoprotein L	HNRNPL	PSRYGPQYGHPPPPPPPPEYGPHADSPVLMV	1193	P	4	1723		0.398555	0.000586635	46.772	42.058	40.937	-0.31791	0	371	0	0	0	0.398555	NaN	NaN	46.772	0	0	NaN	NaN	NaN	NaN	NaN	NaN	NaN	NaN	NaN	NaN	NaN	NaN	NaN	NaN	NaN	NaN	NaN	NaN	NaN	NaN	NaN
P14866	372	P14866	P14866	Heterogeneous nuclear ribonucleoprotein L	HNRNPL	SRYGPQYGHPPPPPPPPEYGPHADSPVLMVY	1194	P	4	1723		0.398555	5.35019e-08	90.014	86.129	40.937	-0.31791	0	372	0	0.263678	0.279096	0.398555	62.383	90.014	71.906	0.263678	0.553867	6.55336e-07	62.383	NaN	NaN	NaN	NaN	NaN	NaN	NaN	NaN	NaN	NaN	NaN	NaN	0.245335	0	1.03879e-05	54.703	0.240718	0	1.35721e-06
P14866	373	P14866	P14866	Heterogeneous nuclear ribonucleoprotein L	HNRNPL	RYGPQYGHPPPPPPPPEYGPHADSPVLMVYG	1195	P	4	1723		0.352988	5.35019e-08	101.2	96.438	101.2	-1.6151	0	373	0	0.317176	0.312575	0.352988	79.19	90.014	101.2	0.317176	0	1.35721e-06	79.19	NaN	NaN	NaN	NaN	0.303959	0	9.12105e-06	55.702	NaN	NaN	NaN	NaN	0.245335	0	1.03879e-05	54.703	0.240718	0	1.35721e-06
P14866	377	P14866	P14866	Heterogeneous nuclear ribonucleoprotein L	HNRNPL	QYGHPPPPPPPPEYGPHADSPVLMVYGLDQS	1196	P	4	1723		0.72884	1.80022e-12	101.44	88.853	67.441	-2.4971	654250000	377	5.66553	0.454833	0.53014	0.72884	89.577	101.44	101.2	0.317176	0	1.35721e-06	79.19	0.432143	0	5.61982e-08	73.266	0.454833	0.893947	5.97983e-06	89.577	NaN	NaN	NaN	NaN	0.245335	0	1.03879e-05	54.703	0.240718	0	1.35721e-06
P14866	382	P14866	P14866	Heterogeneous nuclear ribonucleoprotein L	HNRNPL	PPPPPPPEYGPHADSPVLMVYGLDQSKMNCD	1197	P	3	1723		0.999648	1.72291e-16	146.58	138.31	143.09	-1.3041	5850600000	382	34.5684	0.997638	0.999648	0.984013	146.58	143.09	115.74	0.842718	12.5383	1.29667e-07	81.28	0.985081	19.7964	5.61982e-08	95.099	0.997638	26.4323	1.72291e-16	146.58	0.58004	6.54995	1.66888e-06	61.583	0.245335	0	1.03879e-05	54.703	0.612764	7.04123	5.69947e-08
P14868	395	P14868	P14868	Aspartate--tRNA ligase, cytoplasmic	DARS	VKEKYDTDFYILDKYPLAVRPFYTMPDPRNP	1198	P	3	1724		0.411256	0.000304371	88.09	81.586	88.09	0.13402	0	395	1.53317	0.411256	NaN	NaN	88.09	NaN	NaN	NaN	NaN	NaN	NaN	0.411256	1.53317	0.000304371	88.09	0	0	NaN	NaN	NaN	NaN	NaN	NaN	NaN	NaN	NaN	NaN	NaN	NaN	NaN
P14868	400	P14868	P14868	Aspartate--tRNA ligase, cytoplasmic	DARS	DTDFYILDKYPLAVRPFYTMPDPRNPKQSNS	1199	P	4	1724		0.652643	0.000343725	75.524	69.744	75.524	-0.25586	186120000	400	3.82775	0	0.652643	NaN	NaN	75.524	NaN	NaN	NaN	NaN	NaN	NaN	NaN	NaN	NaN	0	0	NaN	NaN	NaN	NaN	NaN	NaN	NaN	NaN	NaN	NaN	NaN	NaN	NaN
P14868	405	P14868	P14868	Aspartate--tRNA ligase, cytoplasmic	DARS	ILDKYPLAVRPFYTMPDPRNPKQSNSYDMFM	1200	P	4	1724		0.714832	6.45596e-05	85.376	79.596	56.485	-0.25933	801600000	405	8.09563	0	0.702925	0.714832	NaN	85.376	77.641	NaN	NaN	NaN	NaN	NaN	NaN	NaN	NaN	0	0	NaN	NaN	NaN	NaN	NaN	NaN	NaN	NaN	NaN	NaN	NaN	NaN	NaN
P14923	512	P14923	P14923	Junction plakoglobin	JUP	LVKATIGLIRNLALCPANHAPLQEAAVIPRL	1201	P	3	1725		0.98467	0.00811968	56.081	48.277	56.081	0.27367	21087000	512	18.0819	0.98467	NaN	0.966318	56.081	NaN	51.819	NaN	NaN	NaN	NaN	NaN	NaN	NaN	NaN	NaN	NaN	NaN	NaN	0.98467	18.0819	0.00811968	56.081	NaN	NaN	NaN	NaN	NaN	NaN	NaN
P14923	629	P14923	P14923	Junction plakoglobin	JUP	DKEAADAIDAEGASAPLMELLHSRNEGTATY	1202	P	4	1725		1	0.000723271	54.05	44.423	54.05	-0.042836	30887000	629	54.0501	1	NaN	NaN	54.05	NaN	NaN	NaN	NaN	NaN	NaN	NaN	NaN	NaN	NaN	1	54.0501	0.000723271	54.05	NaN	NaN	NaN	NaN	NaN	NaN	NaN	NaN	NaN	NaN	NaN
P15121	216	P15121	P15121	Aldose reductase	AKR1B1	QSKGIVVTAYSPLGSPDRPWAKPEDPSLLED	1203	P	4	1730		0.779104	0.0333408	43.732	38.467	43.732	-0.083862	39982000	216	10.0563	NaN	0.779104	NaN	NaN	43.732	NaN	NaN	NaN	NaN	NaN	NaN	NaN	NaN	NaN	NaN	NaN	NaN	NaN	NaN	NaN	NaN	NaN	NaN	NaN	NaN	NaN	NaN	NaN	NaN
P15121	219	P15121	P15121	Aldose reductase	AKR1B1	GIVVTAYSPLGSPDRPWAKPEDPSLLEDPRI	1204	P	4	1730		0.823568	0.0103041	49.101	34.396	43.732	-0.083862	68282000	219	10.0563	0.688936	0.823568	NaN	49.101	43.732	NaN	NaN	NaN	NaN	NaN	NaN	NaN	NaN	NaN	NaN	NaN	NaN	NaN	0.688936	0.466447	0.0103041	49.101	NaN	NaN	NaN	NaN	NaN	NaN	NaN
P15121	223	P15121	P15121	Aldose reductase	AKR1B1	TAYSPLGSPDRPWAKPEDPSLLEDPRIKAIA	1205	P	4	1730		0.322712	0.0103041	49.101	34.396	49.101	0.1434	0	223	0.466447	0.322712	NaN	NaN	49.101	NaN	NaN	NaN	NaN	NaN	NaN	NaN	NaN	NaN	NaN	NaN	NaN	NaN	NaN	0.322712	0.466447	0.0103041	49.101	NaN	NaN	NaN	NaN	NaN	NaN	NaN
P15121	113	P15121	P15121	Aldose reductase	AKR1B1	SDLKLDYLDLYLIHWPTGFKPGKEFFPLDES	1206	P	5	1730		1	0.00153505	77.39	69.857	47.237	0.79148	961810000	113	47.2368	1	1	1	72.532	64.028	77.39	NaN	NaN	NaN	NaN	1	49.6375	0.025253	49.638	1	72.5319	0.00153505	72.532	NaN	NaN	NaN	NaN	NaN	NaN	NaN	NaN	NaN	NaN	NaN
P15121	118	P15121	P15121	Aldose reductase	AKR1B1	DYLDLYLIHWPTGFKPGKEFFPLDESGNVVP	1207	P	5	1730		1	0.00153505	77.39	69.857	47.237	0.79148	961810000	118	47.2368	1	1	1	72.532	64.028	77.39	NaN	NaN	NaN	NaN	1	49.6375	0.025253	49.638	1	72.5319	0.00153505	72.532	NaN	NaN	NaN	NaN	NaN	NaN	NaN	NaN	NaN	NaN	NaN
P15121	189	P15121	P15121	Aldose reductase	AKR1B1	PGLKYKPAVNQIECHPYLTQEKLIQYCQSKG	1208	P	3	1730		0.999836	0.010666	60.474	55.472	60.474	-0.33921	105230000	189	37.8444	0.999836	NaN	0.997082	60.474	NaN	48.899	NaN	NaN	NaN	NaN	NaN	NaN	NaN	NaN	NaN	NaN	NaN	NaN	NaN	NaN	NaN	NaN	0.999836	37.8444	0.010666	60.474	NaN	NaN	NaN
P15170	42	P15170	P15170	Eukaryotic peptide chain release factor GTP-binding subunit ERF3A	GSPT1	ISEAEPGGGSLGDGRPPEESAHEMMEEEEEI	1209	P	5	1732		0.974439	2.10287e-05	54.376	54.376	54.376	-0.0016852	84789000	42	19.9964	0.974439	0.871892	NaN	54.376	44.915	NaN	NaN	NaN	NaN	NaN	NaN	NaN	NaN	NaN	NaN	NaN	NaN	NaN	NaN	NaN	NaN	NaN	0.974439	19.9964	2.10287e-05	54.376	NaN	NaN	NaN
[truncated: 4,301 more rows]
[truncated: 49 more columns]

## Sheet: RCC4
Proteins	Positions within proteins	Leading proteins	Protein	Protein names	Gene names	Sequence window	id	Amino acid	Charge	Protein group IDs	Diagnostic peak	Localization prob	PEP	Score	Delta score	Score for localization	Mass error [ppm]	Intensity	Position	DMSO Localization prob	FG Localization prob	MG Localization prob	DMSO Score	FG Score	MG Score	Localization prob DMSO-B0	Score diff DMSO-B0	PEP DMSO-B0	Score DMSO-B0	Localization prob DMSO-B1T1	Score diff DMSO-B1T1	PEP DMSO-B1T1	Score DMSO-B1T1	Localization prob DMSO-B1T2	Score diff DMSO-B1T2	PEP DMSO-B1T2	Score DMSO-B1T2	Localization prob DMSO-B1T3	Score diff DMSO-B1T3	PEP DMSO-B1T3	Score DMSO-B1T3	Localization prob DMSO-B2	Score diff DMSO-B2	PEP DMSO-B2	Score DMSO-B2	Localization prob FG-B0	Score diff FG-B0	PEP FG-B0	Score FG-B0
[truncated: 3,588 more rows]
[truncated: 36 more columns]
