# Supplementary material for: Systematic characterization of site-specific proline hydroxylation using hydrophilic interaction chromatography and mass spectrometry
Source: bioRxiv preprint, doi:10.1101/2023.07.28.550951, version 4 (2025-11-29)
Supplement: Supplemental Table 3 [file 550951_file05.xlsx]

## Sheet: HEK293
Proteins	Positions within proteins	Leading proteins	Protein	Protein names	Gene names	Sequence window	id	Amino acid	Charge	Protein group IDs	Diagnostic peak	P-6	P-5	P-4	P-3	P-2	P-1	P	P+1	P+2	P+3	P+4	P+5	P+6	Localization prob	PEP	Score	Delta score	Score for localization	Mass error [ppm]	Intensity	DMSO Localization prob	FG Localization prob	MG Localization prob	DMSO Score	FG Score	MG Score
P0DPI2;A0A0B4J2D5	97;97	P0DPI2	P0DPI2			PDVPQMHVIDHTKGQPSEGESRNVLTESARI	1	P	5	1		PDVPQMHVID	H	T	K	G	Q	P	S	E	G	E	S	RNVLTESARI	0.772795	0.000176582	44.023	36.937	44.023	1.1081	95144000	NaN	0.772795	NaN	NaN	44.023	NaN
A0A2R8Y4L2;P09651	31;76	A0A2R8Y4L2;P09651	P09651	Heterogeneous nuclear ribonucleoprotein A1;Heterogeneous nuclear ribonucleoprotein A1, N-terminally processed	HNRNPA1	TYATVEEVDAAMNARPHKVDGRVVEPKRAVS	3	P	5	1539;7		TYATVEEVDA	A	M	N	A	R	P	H	K	V	D	G	RVVEPKRAVS	1	5.13e-08	127.28	121.83	58.284	-0.22424	14301000000	1	1	1	116.21	99.86	127.28
A0A2R8Y4L2;P09651	254;351	A0A2R8Y4L2;P09651	P09651	Heterogeneous nuclear ribonucleoprotein A1;Heterogeneous nuclear ribonucleoprotein A1, N-terminally processed	HNRNPA1	RSSGPHGGGGQYFAKPRNQGGYGGSSSSSSY;RSSGPYGGGGQYFAKPRNQGGYGGSSSSSSY	5	P	2	1539;7		RSSGPHGGGG	Q	Y	F	A	K	P	R	N	Q	G	G	YGGSSSSSSY	1	0.000554662	96.993	79.625	76.85	-2.2195	0	NaN	1	1	NaN	96.993	76.85
A0A3B3IU46	9	A0A3B3IU46	A0A3B3IU46			_______MTDTAEAVPNFEEMFASRFTENDK	6	P	2	12		_______MTD	T	A	E	A	V	P	N	F	E	E	M	FASRFTENDK	1	0.000884601	75.695	68.948	75.695	-1.2283	19728000	NaN	1	1	NaN	64.55	75.695
A1L0T0	142	A1L0T0	A1L0T0	Acetolactate synthase-like protein	ILVBL	TNTVTAVKNAQMAQSPILLLGGAASTLLQNR	10	P	3	26		TNTVTAVKNA	Q	M	A	Q	S	P	I	L	L	L	G	GAASTLLQNR	1	0.00571943	52.061	47.647	52.061	0.55284	5869900	1	NaN	NaN	52.061	NaN	NaN
A2RTX5	40	A2RTX5	A2RTX5	Probable threonine--tRNA ligase 2, cytoplasmic	TARSL2	LWSEVERLRDEQLNAPYSCQAEGPCLTREVA	11	P	3	36		LWSEVERLRD	E	Q	L	N	A	P	Y	S	C	Q	A	EGPCLTREVA	1	3.59e-05	94.064	85.305	94.064	1.2398	428850000	0.999999	0.999999	1	84.689	84.573	94.064
A3KN83	1063	A3KN83	A3KN83	Protein strawberry notch homolog 1	SBNO1	IVMKSIVNLDSPMVSPPPDYPGEFFKDVRQG	15	P	3	44		IVMKSIVNLD	S	P	M	V	S	P	P	P	D	Y	P	GEFFKDVRQG	0.500884	0.0299278	45.369	37.836	45.369	1.666	4635200	NaN	NaN	0.500884	NaN	NaN	45.369
A5YKK6	2143	A5YKK6	A5YKK6	CCR4-NOT transcription complex subunit 1	CNOT1	LRNLILSAFPRNMRLPDPFTPNLKVDMLSEI	19	P	3	56		LRNLILSAFP	R	N	M	R	L	P	D	P	F	T	P	NLKVDMLSEI	0.963448	0.0158106	68.689	62.256	68.689	-4.2052	26998000	NaN	NaN	0.963448	NaN	NaN	68.689
A5YKK6	1159	A5YKK6	A5YKK6	CCR4-NOT transcription complex subunit 1	CNOT1	NFHSLYSNFLDTLKNPEFNKMVLNETYRNIK	21	P	5	56		NFHSLYSNFL	D	T	L	K	N	P	E	F	N	K	M	VLNETYRNIK	0.999564	3.91e-07	74.144	69.522	74.144	-1.7447	74188000	NaN	0.999564	NaN	NaN	74.144	NaN
A6NDG6	47	A6NDG6	A6NDG6	Phosphoglycolate phosphatase	PGP	LFDCDGVLWRGETAVPGAPEALRALRARGKR	22	P	3	62		LFDCDGVLWR	G	E	T	A	V	P	G	A	P	E	A	LRALRARGKR	1	0.0303539	40.753	35.504	40.753	-3.8786	23501000	NaN	1	NaN	NaN	40.753	NaN
A6NDG6	50	A6NDG6	A6NDG6	Phosphoglycolate phosphatase	PGP	CDGVLWRGETAVPGAPEALRALRARGKRLGF	23	P	3	62		CDGVLWRGET	A	V	P	G	A	P	E	A	L	R	A	LRARGKRLGF	1	0.0303539	40.753	35.504	40.753	-3.8786	23501000	NaN	1	NaN	NaN	40.753	NaN
A6NHQ2	195	A6NHQ2	A6NHQ2	rRNA/tRNA 2'-O-methyltransferase fibrillarin-like protein 1	FBLL1	AASGTTVSHVSDIIGPDGLVYAVEFSHRAGR	25	P	4	70		AASGTTVSHV	S	D	I	I	G	P	D	G	L	V	Y	AVEFSHRAGR	1	0.0270198	40.764	30.154	40.764	-2.7717	111210000	1	NaN	NaN	40.764	NaN	NaN
A6NHR9	979	A6NHR9	A6NHR9	Structural maintenance of chromosomes flexible hinge domain-containing protein 1	SMCHD1	PKLIVHCKFSGAPNLPVYVVDCSSSGTSILT	26	P	3	72		PKLIVHCKFS	G	A	P	N	L	P	V	Y	V	V	D	CSSSGTSILT	0.854404	0.00434856	41.483	36.218	41.483	2.546	2082100	0.854404	NaN	NaN	41.483	NaN	NaN
A6NJ78	205	A6NJ78	A6NJ78	Probable methyltransferase-like protein 15	METTL15	GPLDMRMDGGRYPDMPTAADVVNALDQQALA	28	P	4	77		GPLDMRMDGG	R	Y	P	D	M	P	T	A	A	D	V	VNALDQQALA	1	0.00156773	78.921	78.921	78.921	-2.7502	30963000	NaN	NaN	1	NaN	NaN	78.921
A6NKT7;O14715;P49792;Q99666	1040;1039;2015;1039	A6NKT7;O14715;P49792;Q99666	P49792	RanBP2-like and GRIP domain-containing protein 3;RANBP2-like and GRIP domain-containing protein 8;E3 SUMO-protein ligase RanBP2;RANBP2-like and GRIP domain-containing protein 5/6	RGPD3;RGPD8;RANBP2;RGPD5	DDAYKTEDSDDIHFEPVVQMPEKVELVTGEE	29	P	3	2551;388;7253;82		DDAYKTEDSD	D	I	H	F	E	P	V	V	Q	M	P	EKVELVTGEE	0.915578	9.21e-05	95.819	88.866	95.819	-0.26326	42249000	0.878918	0.915578	0.876523	40.545	95.819	58.137
A6NNZ2;Q3ZCM7	218;218	A6NNZ2;Q3ZCM7	Q3ZCM7	Tubulin beta-8 chain-like protein LOC260334;Tubulin beta-8 chain	TUBB8	DNEALYDICSKTLKLPTPTYGDLNHLVSATM;DNEALYDICSRTLKLPTPTYGDLNHLVSATM	31	P	4	4229;88		DNEALYDICS	K	T	L	K	L	P	T	P	T	Y	G	DLNHLVSATM	1	5.01e-08	80.652	73.276	80.359	1.058	2882400000	1	1	1	80.603	80.359	80.652
A6NNZ2;Q3ZCM7	220;220	A6NNZ2;Q3ZCM7	Q3ZCM7	Tubulin beta-8 chain-like protein LOC260334;Tubulin beta-8 chain	TUBB8	EALYDICSKTLKLPTPTYGDLNHLVSATMSG;EALYDICSRTLKLPTPTYGDLNHLVSATMSG	32	P	4	4229;88		EALYDICSKT	L	K	L	P	T	P	T	Y	G	D	L	NHLVSATMSG	1	5.01e-08	80.652	73.276	80.359	1.058	2882400000	1	1	1	80.603	80.359	80.652
A6NNZ2;P04350;P68371;Q13509;Q13885;Q3ZCM7;Q9BUF5;Q9BVA1	305;305;305;305;305;305;305;305	A6NNZ2;P04350;P68371;Q13509;Q13885;Q3ZCM7;Q9BUF5;Q9BVA1	P68371	Tubulin beta-8 chain-like protein LOC260334;Tubulin beta-4A chain;Tubulin beta-4B chain;Tubulin beta-3 chain;Tubulin beta-2A chain;Tubulin beta-8 chain;Tubulin beta-6 chain;Tubulin beta-2B chain	TUBB4A;TUBB4B;TUBB3;TUBB2A;TUBB8;TUBB6;TUBB2B	TQQMFDAKNMMAACDPRHGCYLTVAAIFRGR;TQQMFDAKNMMAACDPRHGRYLTAAAIFRGR;TQQMFDAKNMMAACDPRHGRYLTVAAVFRGR;TQQMFDAKNMMAACDPRHGRYLTVATVFRGR;TQQMFDARNMMAACDPRHGRYLTVATVFRGP;TQQMFDSKNMMAACDPRHGRYLTVAAIFRGR	33	P	2	1388;3076;3612;3678;4229;7499;7544;88		TQQMFDAKNM	M	A	A	C	D	P	R	H	G	C	Y	LTVAAIFRGR	1	0.0349331	67.032	65.188	67.032	0.02122	0	1	NaN	NaN	67.032	NaN	NaN
A8MXV4	51	A8MXV4	A8MXV4	Nucleoside diphosphate-linked moiety X motif 19, mitochondrial	NUDT19	PPPAEGFRLLLLQRSPHQGFMPGAHVFSGGV	36	P	4	107		PPPAEGFRLL	L	L	Q	R	S	P	H	Q	G	F	M	PGAHVFSGGV	0.858166	3.05e-10	86.194	82.235	48.984	-1.2702	790820000	0.858166	0.553813	0.854084	48.984	86.194	76.976
A8MXV4	57	A8MXV4	A8MXV4	Nucleoside diphosphate-linked moiety X motif 19, mitochondrial	NUDT19	FRLLLLQRSPHQGFMPGAHVFSGGVLDAADR	37	P	4	107		FRLLLLQRSP	H	Q	G	F	M	P	G	A	H	V	F	SGGVLDAADR	0.94474	0.00221291	53.266	42.123	53.266	0.037137	84665000	NaN	0.94474	0	NaN	53.266	NaN
E9PAV3	1386	E9PAV3	E9PAV3	Nascent polypeptide-associated complex subunit alpha, muscle-specific form	NACA	PPAATPSHKGGPAMTPPSPKRGPAIPSPKGD	62	P	4	237		PPAATPSHKG	G	P	A	M	T	P	P	S	P	K	R	GPAIPSPKGD	0.770172	0.00737293	41.76	26.99	41.76	-3.2075	47814000	NaN	NaN	0.770172	NaN	NaN	41.76
O00116	358	O00116	O00116	Alkyldihydroxyacetonephosphate synthase, peroxisomal	AGPS	GIIEKSCQGPRMSTGPDIHHFIMGSEGTLGV	63	P	4	245		GIIEKSCQGP	R	M	S	T	G	P	D	I	H	H	F	IMGSEGTLGV	1	8.66e-05	93.397	86.821	78.202	0.68372	630380000	1	1	1	78.202	93.397	83.701
O00116	126	O00116	O00116	Alkyldihydroxyacetonephosphate synthase, peroxisomal	AGPS	IELTGKRYPLSGMGLPTFKEWIQNTLGVNVE	64	P	3	245		IELTGKRYPL	S	G	M	G	L	P	T	F	K	E	W	IQNTLGVNVE	0.998696	0.000513738	62.677	56.897	62.677	-4.2549	0	0.998696	NaN	NaN	62.677	NaN	NaN
O00139	259	O00139	O00139	Kinesin-like protein KIF2A	KIF2A	DVITIPSKDVVMVHEPKQKVDLTRYLENQTF	65	P	4	247		DVITIPSKDV	V	M	V	H	E	P	K	Q	K	V	D	LTRYLENQTF	0.999145	0.00358878	61.102	50.962	61.102	0.289	2457100	NaN	NaN	0.999145	NaN	NaN	61.102
O00148	165	O00148	O00148	ATP-dependent RNA helicase DDX39A	DDX39A	GLSIKKDEEVLKKNCPHVVVGTPGRILALVR	68	P	3	248		GLSIKKDEEV	L	K	K	N	C	P	H	V	V	V	G	TPGRILALVR	1	0.00582348	77.597	62.395	74.698	0.63698	207870000	1	NaN	NaN	77.597	NaN	NaN
O00151	11	O00151	O00151	PDZ and LIM domain protein 1	PDLIM1	_____MTTQQIDLQGPGPWGFRLVGGKDFEQ	69	P	2	249		_____MTTQQ	I	D	L	Q	G	P	G	P	W	G	F	RLVGGKDFEQ	1	2.42e-05	147.24	130.89	56.225	-0.67356	172590000	1	1	1	103.21	147.24	128.85
O00151	13	O00151	O00151	PDZ and LIM domain protein 1	PDLIM1	___MTTQQIDLQGPGPWGFRLVGGKDFEQPL	70	P	2	249		___MTTQQID	L	Q	G	P	G	P	W	G	F	R	L	VGGKDFEQPL	1	2.42e-05	147.24	130.89	56.225	-0.67356	172590000	1	1	1	103.21	147.24	128.85
O00178	482	O00178	O00178	GTP-binding protein 1	GTPBP1	KIKRSSIRKGMVMVSPRLNPQASWEFEAEIL	72	P	2	255		KIKRSSIRKG	M	V	M	V	S	P	R	L	N	P	Q	ASWEFEAEIL	1	0.0249836	69.998	44.104	69.998	-2.8391	0	NaN	1	NaN	NaN	69.998	NaN
O00193	18	O00193	O00193	Small acidic protein	SMAP	AARESHPHGVKRSASPDDDLGSSNWEAADLG	74	P	2	259		AARESHPHGV	K	R	S	A	S	P	D	D	D	L	G	SSNWEAADLG	1	0.0062451	53.828	47.797	53.828	-1.6031	43126000	1	NaN	1	50.851	NaN	53.828
O00203	640	O00203	O00203	AP-3 complex subunit beta-1	AP3B1	TLNIKATGYLELSNWPEVAPDPSVRNVEVIE	75	P	2	261		TLNIKATGYL	E	L	S	N	W	P	E	V	A	P	D	PSVRNVEVIE	0.998905	0.015381	80.312	71.491	78.401	-2.9365	37387000	0.998905	NaN	NaN	80.312	NaN	NaN
O00203	644	O00203	O00203	AP-3 complex subunit beta-1	AP3B1	KATGYLELSNWPEVAPDPSVRNVEVIELAKE	76	P	2	261		KATGYLELSN	W	P	E	V	A	P	D	P	S	V	R	NVEVIELAKE	0.952432	0.0173703	80.312	71.491	80.312	0.55875	37387000	0.952432	NaN	NaN	80.312	NaN	NaN
O00233	55	O00233	O00233	26S proteasome non-ATPase regulatory subunit 9	PSMD9	NYDVLESQKGIGMNEPLVDCEGYPRSDVDLY	80	P	3	268		NYDVLESQKG	I	G	M	N	E	P	L	V	D	C	E	GYPRSDVDLY	0.999847	0.000303368	90.468	85.181	90.468	-0.91316	51961000	0.994002	0.999847	0.999255	49.618	90.468	60.472
O00264	87	O00264	O00264	Membrane-associated progesterone receptor component 1	PGRMC1	DFTPAELRRFDGVQDPRILMAINGKVFDVTK	81	P	4	273		DFTPAELRRF	D	G	V	Q	D	P	R	I	L	M	A	INGKVFDVTK	1	4.15e-06	101.71	94.754	56.766	-0.64618	61175000	NaN	1	NaN	NaN	101.71	NaN
O00267	667	O00267	O00267	Transcription elongation factor SPT5	SUPT5H	RDVTNFTVGGFAPMSPRISSPMHPSAGGQRG	82	P	2	274		RDVTNFTVGG	F	A	P	M	S	P	R	I	S	S	P	MHPSAGGQRG	0.71739	0.00550135	132.59	120.53	132.59	-0.38381	353270000	0.691508	NaN	0.71739	113.65	NaN	132.59
O00299	224	O00299	O00299	Chloride intracellular channel protein 1	CLIC1	YLSNAYAREEFASTCPDDEEIELAYEQVAKA	85	P	3	279		YLSNAYAREE	F	A	S	T	C	P	D	D	E	E	I	ELAYEQVAKA	1	0.035163	44.105	42.867	44.105	-0.073416	9883700	1	NaN	NaN	44.105	NaN	NaN
O00410	159	O00410	O00410	Importin-5	IPO5	NVGLREAALHIFWNFPGIFGNQQQHYLDVIK	88	P	3	290		NVGLREAALH	I	F	W	N	F	P	G	I	F	G	N	QQQHYLDVIK	1	8.93e-05	120.08	110.75	120.08	-3.9294	7831300	NaN	NaN	1	NaN	NaN	120.08
O00410	474	O00410	O00410	Importin-5	IPO5	QAHAAAALINFTEDCPKSLLIPYLDNLVKHL	91	P	3	290		QAHAAAALIN	F	T	E	D	C	P	K	S	L	L	I	PYLDNLVKHL	1	0.00728662	60.542	56.701	55.589	0.77963	69668000	1	NaN	NaN	60.542	NaN	NaN
O00411	654	O00411	O00411	DNA-directed RNA polymerase, mitochondrial	POLRMT	LTFEAVDVPMLCPPLPWTSPHSGAFLLSPTK	93	P	3	291		LTFEAVDVPM	L	C	P	P	L	P	W	T	S	P	H	SGAFLLSPTK	0.617702	7.88e-05	48.088	43.279	48.088	-0.57905	6167700	NaN	0.617702	NaN	NaN	48.088	NaN
O00422	52	O00422	O00422	Histone deacetylase complex subunit SAP18	SAP18	NGRHHRMDEFSRGNVPSSELQIYTWMDATLK	96	P	2	293		NGRHHRMDEF	S	R	G	N	V	P	S	S	E	L	Q	IYTWMDATLK	1	0.000115693	75.463	64.995	75.463	-1.3105	57981000	0.99998	NaN	1	52.92	NaN	75.463
O00429	154	O00429	O00429	Dynamin-1-like protein	DNM1L	VVNLTLVDLPGMTKVPVGDQPKDIELQIREL	99	P	3	296		VVNLTLVDLP	G	M	T	K	V	P	V	G	D	Q	P	KDIELQIREL	0.574574	1.23e-07	124.45	111.96	81.839	0.36727	296480000	NaN	0.516665	0.574574	NaN	124.45	81.839
O00566	531	O00566	O00566	U3 small nucleolar ribonucleoprotein protein MPP10	MPHOSPH10	IPKPPVPEIKVVSNLPAITMEEVAPVSVSDA	103	P	4	324		IPKPPVPEIK	V	V	S	N	L	P	A	I	T	M	E	EVAPVSVSDA	0.999964	7.42e-05	97.509	91.849	97.509	1.193	1271700000	0.99971	0.943659	0.999964	88.942	54.583	97.509
O00567	469	O00567	O00567	Nucleolar protein 56	NOP56	LAALALASSENSSSTPEECEEMSEKPKKKKK	104	P	3	325		LAALALASSE	N	S	S	S	T	P	E	E	C	E	E	MSEKPKKKKK	1	7.27e-05	94.72	94.72	43.696	-0.094518	1670300000	1	0.896508	0.952477	94.72	88.222	66.282
O00567	479	O00567	O00567	Nucleolar protein 56	NOP56	NSSSTPEECEEMSEKPKKKKKQKPQEVPQEN	105	P	3	325		NSSSTPEECE	E	M	S	E	K	P	K	K	K	K	K	QKPQEVPQEN	0.999982	5.28e-29	172.02	165.52	140.87	-0.31637	10077000000	0.999896	0.999982	0.999486	161.16	172.02	143.19
O00567	53	O00567	O00567	Nucleolar protein 56	NOP56	NLGKFHSIVRLVAFCPFASSQVALENANAVS	106	P	6	325		NLGKFHSIVR	L	V	A	F	C	P	F	A	S	S	Q	VALENANAVS	0.999906	0.00117451	42.524	36.463	42.524	1.0293	10572000	NaN	0.999906	NaN	NaN	42.524	NaN
O00571	568	O00571	O00571	ATP-dependent RNA helicase DDX3X	DDX3X	TKDLLDLLVEAKQEVPSWLENMAYEHHYKGS	107	P	6	326		TKDLLDLLVE	A	K	Q	E	V	P	S	W	L	E	N	MAYEHHYKGS	1	9.75e-06	84.58	75.962	51.089	-3.4559	456670000	1	1	NaN	62.393	84.58	NaN
O00592	541	O00592	O00592	Podocalyxin	PODXL	KVVSLNGELGDSWIVPLDNLTKDDLDEEEDT	108	P	3	328		KVVSLNGELG	D	S	W	I	V	P	L	D	N	L	T	KDDLDEEEDT	1	0.0017988	64.152	55.265	64.152	-4.3953	0	NaN	NaN	1	NaN	NaN	64.152
O00762	142	O00762	O00762	Ubiquitin-conjugating enzyme E2 C	UBE2C	DVRTILLSIQSLLGEPNIDSPLNTHAAELWK	109	P	3	342		DVRTILLSIQ	S	L	L	G	E	P	N	I	D	S	P	LNTHAAELWK	1	0.00961815	61.602	50.797	61.602	2.0157	32932000	1	NaN	NaN	61.602	NaN	NaN
O00762	147	O00762	O00762	Ubiquitin-conjugating enzyme E2 C	UBE2C	LLSIQSLLGEPNIDSPLNTHAAELWKNPTAF	110	P	3	342		LLSIQSLLGE	P	N	I	D	S	P	L	N	T	H	A	AELWKNPTAF	1	0.000163363	65.301	60.984	61.602	2.0157	32932000	1	NaN	0.844617	61.602	NaN	65.301
O14519	25	O14519	O14519	Cyclin-dependent kinase 2-associated protein 1	CDK2AP1	HMPAAALNAAGSVHSPSTSMATSSQYRQLLS	118	P	4	349		HMPAAALNAA	G	S	V	H	S	P	S	T	S	M	A	TSSQYRQLLS	1	2.37e-17	146.12	141.06	146.12	-0.30597	938760000	1	1	1	102.55	116.94	146.12
O14639	692	O14639	O14639	Actin-binding LIM protein 1	ABLIM1	SYGDVSGGVRDYQTLPDGHMPAMRMDRGVSM	122	P	6	370		SYGDVSGGVR	D	Y	Q	T	L	P	D	G	H	M	P	AMRMDRGVSM	0.839168	9.7e-08	59.401	55.366	59.401	-0.3049	20878000	NaN	NaN	0.839168	NaN	NaN	59.401
O14678	8	O14678	O14678	ATP-binding cassette sub-family D member 4	ABCD4	________MAVAGPAPGAGARPRLDLQFLQR	125	P	2	382		________MA	V	A	G	P	A	P	G	A	G	A	R	PRLDLQFLQR	0.993086	0.0317792	53.775	12.548	41.876	0.40391	303740000	0.5	0.993086	0.5	53.775	41.876	46.129
O14686	2472	O14686	O14686	Histone-lysine N-methyltransferase 2D	KMT2D	PQSRDPFAPLHKPPRPQPPEVAFKAGSLAHT	126	P	4	385		PQSRDPFAPL	H	K	P	P	R	P	Q	P	P	E	V	AFKAGSLAHT	0.66667	0.00129927	45.003	32.594	45.003	-2.0992	122550000	NaN	0.66667	NaN	NaN	45.003	NaN
O14686	2474	O14686	O14686	Histone-lysine N-methyltransferase 2D	KMT2D	SRDPFAPLHKPPRPQPPEVAFKAGSLAHTSL	127	P	4	385		SRDPFAPLHK	P	P	R	P	Q	P	P	E	V	A	F	KAGSLAHTSL	0.66667	0.00129927	45.003	32.594	45.003	-2.0992	122550000	NaN	0.66667	NaN	NaN	45.003	NaN
O14686	2475	O14686	O14686	Histone-lysine N-methyltransferase 2D	KMT2D	RDPFAPLHKPPRPQPPEVAFKAGSLAHTSLG	128	P	4	385		RDPFAPLHKP	P	R	P	Q	P	P	E	V	A	F	K	AGSLAHTSLG	0.66667	0.00129927	45.003	32.594	45.003	-2.0992	122550000	NaN	0.66667	NaN	NaN	45.003	NaN
O14686	2495	O14686	O14686	Histone-lysine N-methyltransferase 2D	KMT2D	KAGSLAHTSLGAGGFPAALPAGPAGELHAKV	129	P	4	385		KAGSLAHTSL	G	A	G	G	F	P	A	A	L	P	A	GPAGELHAKV	0.878853	0.00129927	45.003	32.594	45.003	-2.0992	122550000	NaN	0.878853	NaN	NaN	45.003	NaN
O14686	2499	O14686	O14686	Histone-lysine N-methyltransferase 2D	KMT2D	LAHTSLGAGGFPAALPAGPAGELHAKVPSGQ	130	P	4	385		LAHTSLGAGG	F	P	A	A	L	P	A	G	P	A	G	ELHAKVPSGQ	0.560569	0.00129927	45.003	32.594	45.003	-2.0992	122550000	NaN	0.560569	NaN	NaN	45.003	NaN
O14686	2502	O14686	O14686	Histone-lysine N-methyltransferase 2D	KMT2D	TSLGAGGFPAALPAGPAGELHAKVPSGQPPN	131	P	4	385		TSLGAGGFPA	A	L	P	A	G	P	A	G	E	L	H	AKVPSGQPPN	0.560569	0.00129927	45.003	32.594	45.003	-2.0992	122550000	NaN	0.560569	NaN	NaN	45.003	NaN
O14686	3156	O14686	O14686	Histone-lysine N-methyltransferase 2D	KMT2D	VEPAPAANSLGLGLKPGQSMMGSRDTRMGTG	132	P	3	385		VEPAPAANSL	G	L	G	L	K	P	G	Q	S	M	M	GSRDTRMGTG	0.999999	0.0019031	73.981	57.474	73.981	-0.69616	109820000	NaN	0.999957	0.999999	NaN	63.376	73.981
O14744	213	O14744	O14744	Protein arginine N-methyltransferase 5;Protein arginine N-methyltransferase 5, N-terminally processed	PRMT5	YSKRIAVALEIGADLPSNHVIDRWLGEPIKA	134	P	3	397		YSKRIAVALE	I	G	A	D	L	P	S	N	H	V	I	DRWLGEPIKA	1	1.04e-18	149.85	141.23	89.946	1.5138	725370000	1	1	1	149.85	122.3	107.74
O14744	225	O14744	O14744	Protein arginine N-methyltransferase 5;Protein arginine N-methyltransferase 5, N-terminally processed	PRMT5	ADLPSNHVIDRWLGEPIKAAILPTSIFLTNK	135	P	3	397		ADLPSNHVID	R	W	L	G	E	P	I	K	A	A	I	LPTSIFLTNK	1	1.04e-18	149.85	141.23	89.946	1.5138	725370000	1	1	1	149.85	122.3	107.74
O14744	524	O14744	O14744	Protein arginine N-methyltransferase 5;Protein arginine N-methyltransferase 5, N-terminally processed	PRMT5	FHQLSAPQPCFTFSHPNRDPMIDNNRYCTLE	136	P	6	397		FHQLSAPQPC	F	T	F	S	H	P	N	R	D	P	M	IDNNRYCTLE	0.565744	3.53e-05	84.365	72.848	84.365	0.032715	116550000	0.565744	0.527497	NaN	84.365	43.801	NaN
O14745	10	O14745	O14745	Na(+)/H(+) exchange regulatory cofactor NHE-RF1	SLC9A3R1	______MSADAAAGAPLPRLCCLEKGPNGYG	137	P	2	398		______MSAD	A	A	A	G	A	P	L	P	R	L	C	CLEKGPNGYG	0.951004	0.00154652	72.23	49.449	72.23	2.3466	46790000	0.951004	NaN	NaN	72.23	NaN	NaN
O14787	169	O14787	O14787	Transportin-2	TNPO2	CEDSSELLDSDALNRPLNIMIPKFLQFFKHC	138	P	3	409		CEDSSELLDS	D	A	L	N	R	P	L	N	I	M	I	PKFLQFFKHC	0.891809	6.72e-05	90.534	80.817	90.534	0.87184	19636000	NaN	0.891809	NaN	NaN	90.534	NaN
O14787;Q92973	803;804	O14787;Q92973	Q92973	Transportin-2;Transportin-1	TNPO2;TNPO1	VCPQEVAPMLQQFIRPWCTSLRNIRDNEEKD	140	P	3	409;6501		VCPQEVAPML	Q	Q	F	I	R	P	W	C	T	S	L	RNIRDNEEKD	0.999943	0.000300796	73.389	67.959	73.389	-1.1973	202900000	0.999328	0.999943	0.997855	50.827	73.389	53.747
O14802	918	O14802	O14802	DNA-directed RNA polymerase III subunit RPC1	POLR3A	GGDGLDPAAMEGKDEPLEFKRVLDNIKAVFP	143	P	4	411		GGDGLDPAAM	E	G	K	D	E	P	L	E	F	K	R	VLDNIKAVFP	0.945644	0.00294838	47.537	38.991	47.537	-0.73346	55747000	0.945644	0.845525	NaN	47.537	40.129	NaN
O14917	826	O14917	O14917	Protocadherin-17	PCDH17	SEVMYLKPASNNLTVPQGHAGCHTSFTGQGT	148	P	5	425		SEVMYLKPAS	N	N	L	T	V	P	Q	G	H	A	G	CHTSFTGQGT	0.522784	0.000159048	42.461	35.485	42.461	1.6535	29528000	0.522784	NaN	NaN	42.461	NaN	NaN
O14920	684	O14920	O14920	Inhibitor of nuclear factor kappa-B kinase subunit beta	IKBKB	VSGSPDSMNASRLSQPGQLMSQPSTASNSLP	149	P	3	426		VSGSPDSMNA	S	R	L	S	Q	P	G	Q	L	M	S	QPSTASNSLP	0.9879	0.0260921	45.011	36.652	45.011	0.27395	38228000	NaN	NaN	0.9879	NaN	NaN	45.011
O14980	427	O14980	O14980	Exportin-1	XPO1	MLFKVRLLMVSRMAKPEEVLVVENDQGEVVR	153	P	4	445		MLFKVRLLMV	S	R	M	A	K	P	E	E	V	L	V	VENDQGEVVR	1	1.29e-08	116.24	104.05	109.08	0.38098	1336500000	1	1	1	116.24	70.994	103.17
O14981	1047	O14981	O14981	TATA-binding protein-associated factor 172	BTAF1	TTIVKHFGGEMAVKLPHLWDAMVGPLRNTID	156	P	4	446		TTIVKHFGGE	M	A	V	K	L	P	H	L	W	D	A	MVGPLRNTID	1	2.75e-06	93.322	81.356	93.322	0.78691	21980000	NaN	1	NaN	NaN	93.322	NaN
O15013	586	O15013	O15013	Rho guanine nucleotide exchange factor 10	ARHGEF10	ILLLQDMLKNTSKGHPDRLPLQMALTELETL	157	P	4	447		ILLLQDMLKN	T	S	K	G	H	P	D	R	L	P	L	QMALTELETL	0.606629	4.94e-06	112.41	104.64	110.94	-0.15435	436200000	0.606322	0.606629	0.555639	104.1	110.94	112.41
O15013	450	O15013	O15013	Rho guanine nucleotide exchange factor 10	ARHGEF10	NYVDALKRILEQYEKPLSEMEPKVLSERKLK	159	P	2	447		NYVDALKRIL	E	Q	Y	E	K	P	L	S	E	M	E	PKVLSERKLK	0.977796	0.00052821	103.35	70.402	103.35	-2.3264	127460000	NaN	0.977796	0.937515	NaN	103.35	80.706
O15014	377	O15014	O15014	Zinc finger protein 609	ZNF609	DLEMRNGRGRGKRMRPNSNTPVNETATASDS	160	P	4	448		DLEMRNGRGR	G	K	R	M	R	P	N	S	N	T	P	VNETATASDS	1	8.02e-49	186.82	180.79	127.14	-2.2236	90333000	1	0.999948	0.998261	186.82	99.954	68.587
O15027	134	O15027	O15027	Protein transport protein Sec16A	SEC16A	AHASPFSGALTPSAPPGPEMNRSAEVGPSSE	163	P	3	452		AHASPFSGAL	T	P	S	A	P	P	G	P	E	M	N	RSAEVGPSSE	0.565869	0.0003364	73.294	65.301	73.294	0.13233	248740000	NaN	0.540567	0.565869	NaN	54.658	73.294
O15042	505	O15042	O15042	U2 snRNP-associated SURP motif-containing protein	U2SURP	RTEDFRMFKNGSFWRPPPLNPYLHGMSEEQE	172	P	5	457		RTEDFRMFKN	G	S	F	W	R	P	P	P	L	N	P	YLHGMSEEQE	0.634692	5.09e-05	55.366	50.605	55.366	-3.0024	112540000	NaN	0.634692	NaN	NaN	55.366	NaN
O15042	510	O15042	O15042	U2 snRNP-associated SURP motif-containing protein	U2SURP	RMFKNGSFWRPPPLNPYLHGMSEEQETEAFV	173	P	4	457		RMFKNGSFWR	P	P	P	L	N	P	Y	L	H	G	M	SEEQETEAFV	0.932717	3.15e-05	92.49	87.681	92.49	-1.146	69091000	0.857328	0.932717	NaN	60.288	92.49	NaN
O15042	36	O15042	O15042	U2 snRNP-associated SURP motif-containing protein	U2SURP	VHSSGSSDAHMDASGPSDSDMPSRTRPKSPR	174	P	4	457		VHSSGSSDAH	M	D	A	S	G	P	S	D	S	D	M	PSRTRPKSPR	0.999003	0.00025876	58.722	58.722	43.895	-0.0029725	39533000	NaN	NaN	0.999003	NaN	NaN	58.722
O15042	42	O15042	O15042	U2 snRNP-associated SURP motif-containing protein	U2SURP	SDAHMDASGPSDSDMPSRTRPKSPRKHNYRN	175	P	4	457		SDAHMDASGP	S	D	S	D	M	P	S	R	T	R	P	KSPRKHNYRN	0.500034	0.00346859	44.811	44.811	44.811	-0.15545	9794600	NaN	NaN	0.500034	NaN	NaN	44.811
O15054	644	O15054	O15054	Lysine-specific demethylase 6B	KDM6B	RPRVSFPKTPEVGPGPPPGPLSKAPQPVPPG	176	P	2	459		RPRVSFPKTP	E	V	G	P	G	P	P	P	G	P	L	SKAPQPVPPG	0.745334	0.00189824	98.943	77.479	98.943	0.18097	50674000000	0.745334	0.745334	0.744701	98.943	98.943	87.298
O15054	645	O15054	O15054	Lysine-specific demethylase 6B	KDM6B	PRVSFPKTPEVGPGPPPGPLSKAPQPVPPGV	177	P	2	459		PRVSFPKTPE	V	G	P	G	P	P	P	G	P	L	S	KAPQPVPPGV	0.745334	0.00189824	98.943	77.479	98.943	0.18097	50674000000	0.745334	0.745334	0.744701	98.943	98.943	87.298
O15054	646	O15054	O15054	Lysine-specific demethylase 6B	KDM6B	RVSFPKTPEVGPGPPPGPLSKAPQPVPPGVG	178	P	2	459		RVSFPKTPEV	G	P	G	P	P	P	G	P	L	S	K	APQPVPPGVG	0.874453	0.00189824	98.943	77.479	72.434	0.64682	50674000000	0.745334	0.874453	0.744701	98.943	98.943	87.298
O15054	648	O15054	O15054	Lysine-specific demethylase 6B	KDM6B	SFPKTPEVGPGPPPGPLSKAPQPVPPGVGEL	179	P	2	459		SFPKTPEVGP	G	P	P	P	G	P	L	S	K	A	P	QPVPPGVGEL	0.803626	0.00189824	98.943	77.479	67.726	0.19715	50674000000	0.745334	0.745334	0.803626	98.943	98.943	87.298
O15056	1406	O15056	O15056	Synaptojanin-2	SYNJ2	SPDSDGTKAMKPEAAPLLGDYQDPFWNLLHH	180	P	5	460		SPDSDGTKAM	K	P	E	A	A	P	L	L	G	D	Y	QDPFWNLLHH	0.59919	0.00420795	48.984	46.49	48.984	0.0039761	110720000	NaN	NaN	0.59919	NaN	NaN	48.984
O15067	443	O15067	O15067	Phosphoribosylformylglycinamidine synthase	PFAS	GGIGSMEADHISKEAPEPGMEVVKVGGPVYR	182	P	5	466		GGIGSMEADH	I	S	K	E	A	P	E	P	G	M	E	VVKVGGPVYR	0.500147	1.57e-06	71.472	71.472	45.748	-0.83487	231300000	NaN	0.500147	NaN	NaN	71.472	NaN
O15067	1228	O15067	O15067	Phosphoribosylformylglycinamidine synthase	PFAS	PGPALMLRGMEGAVLPVWSAHGEGYVAFSSP	184	P	3	466		PGPALMLRGM	E	G	A	V	L	P	V	W	S	A	H	GEGYVAFSSP	1	1.32e-05	59.65	50.08	51.479	0.13739	60553000	1	1	1	59.65	52.268	51.479
O15067	1243	O15067	O15067	Phosphoribosylformylglycinamidine synthase	PFAS	PVWSAHGEGYVAFSSPELQAQIEARGLAPLH	185	P	3	466		PVWSAHGEGY	V	A	F	S	S	P	E	L	Q	A	Q	IEARGLAPLH	1	1.32e-05	59.65	50.08	51.479	0.13739	60553000	1	1	1	59.65	52.268	51.479
O15067	314	O15067	O15067	Phosphoribosylformylglycinamidine synthase	PFAS	QGLRHVVFTAETHNFPTGVCPFSGATTGTGG	186	P	3	466		QGLRHVVFTA	E	T	H	N	F	P	T	G	V	C	P	FSGATTGTGG	0.827654	0.00153183	53.475	50.542	53.475	-0.24148	28428000	0.827654	NaN	NaN	53.475	NaN	NaN
O15067	319	O15067	O15067	Phosphoribosylformylglycinamidine synthase	PFAS	VVFTAETHNFPTGVCPFSGATTGTGGRIRDV	187	P	4	466		VVFTAETHNF	P	T	G	V	C	P	F	S	G	A	T	TGTGGRIRDV	0.702904	7.25e-05	70.112	67.671	70.112	-0.80773	144540000	0.702904	NaN	NaN	70.112	NaN	NaN
O15067	157	O15067	O15067	Phosphoribosylformylglycinamidine synthase	PFAS	LATLHDRMTEQHFPHPIQSFSPESMPEPLNG	191	P	4	466		LATLHDRMTE	Q	H	F	P	H	P	I	Q	S	F	S	PESMPEPLNG	0.526732	5.1e-05	53.819	44.598	53.819	2.5437	21421000	NaN	NaN	0.526732	NaN	NaN	53.819
O15067	832	O15067	O15067	Phosphoribosylformylglycinamidine synthase	PFAS	VRAPGSLVISAYAVCPDITATVTPDLKHPEG	192	P	3	466		VRAPGSLVIS	A	Y	A	V	C	P	D	I	T	A	T	VTPDLKHPEG	0.997964	0.000335545	60.348	54.918	60.348	-1.3453	19263000	0.997964	NaN	NaN	60.348	NaN	NaN
O15067	1003	O15067	O15067	Phosphoribosylformylglycinamidine synthase	PFAS	AMVRVSVNGAVVLEEPVGELRALWEETSFQL	193	P	4	466		AMVRVSVNGA	V	V	L	E	E	P	V	G	E	L	R	ALWEETSFQL	1	7.76e-07	99.372	89.437	76.063	-1.5014	202010000	NaN	1	1	NaN	99.372	70.062
O15067	1025	O15067	O15067	Phosphoribosylformylglycinamidine synthase	PFAS	LWEETSFQLDRLQAEPRCVAEEERGLRERMG	194	P	4	466		LWEETSFQLD	R	L	Q	A	E	P	R	C	V	A	E	EERGLRERMG	1	7.76e-07	99.372	89.437	76.063	-1.5014	202010000	NaN	1	1	NaN	99.372	70.062
O15111	91	O15111	O15111	Inhibitor of nuclear factor kappa-B kinase subunit alpha	CHUK	ACDVPEELNILIHDVPLLAMEYCSGGDLRKL	196	P	4	477		ACDVPEELNI	L	I	H	D	V	P	L	L	A	M	E	YCSGGDLRKL	1	1.19e-05	115.94	107.03	115.94	1.0639	314360000	1	0.99982	0.999991	115.94	66.825	78.286
O15143	180	O15143	O15143	Actin-related protein 2/3 complex subunit 1B	ARPC1B	KCRIFSAYIKEVEERPAPTPWGSKMPFGELM	198	P	4	486		KCRIFSAYIK	E	V	E	E	R	P	A	P	T	P	W	GSKMPFGELM	0.711791	0.0342291	55.588	43.846	55.588	-0.6409	114350000	0.711791	NaN	NaN	55.588	NaN	NaN
O15143	182	O15143	O15143	Actin-related protein 2/3 complex subunit 1B	ARPC1B	RIFSAYIKEVEERPAPTPWGSKMPFGELMFE	199	P	4	486		RIFSAYIKEV	E	E	R	P	A	P	T	P	W	G	S	KMPFGELMFE	0.644104	0.0342291	55.588	43.846	55.588	-0.6409	114350000	0.644104	NaN	NaN	55.588	NaN	NaN
O15143	184	O15143	O15143	Actin-related protein 2/3 complex subunit 1B	ARPC1B	FSAYIKEVEERPAPTPWGSKMPFGELMFESS	200	P	4	486		FSAYIKEVEE	R	P	A	P	T	P	W	G	S	K	M	PFGELMFESS	0.644104	0.0342291	55.588	43.846	55.588	-0.6409	114350000	0.644104	NaN	NaN	55.588	NaN	NaN
O15144	103	O15144	O15144	Actin-related protein 2/3 complex subunit 2	ARPC2	ESGYNVSLLYDLENLPASKDSIVHQAGMLKR	201	P	4	487		ESGYNVSLLY	D	L	E	N	L	P	A	S	K	D	S	IVHQAGMLKR	1	6.91e-10	104.28	100.28	104.28	-0.090919	167660000	1	NaN	0.999975	104.28	NaN	68.333
O15226	93	O15226	O15226	NF-kappa-B-repressing factor	NKRF	PQTKEVNEQTHFASMPRDIYQDYTQDSFSIQ	206	P	3	503		PQTKEVNEQT	H	F	A	S	M	P	R	D	I	Y	Q	DYTQDSFSIQ	1	0.00211553	88.087	67.246	64.104	-0.68799	918780000	1	1	1	88.087	86.467	79.466
O15270	476	O15270	O15270	Serine palmitoyltransferase 2	SPTLC2	YGNEDSPVVPLMLYMPAKIGAFGREMLKRNI	208	P	4	516		YGNEDSPVVP	L	M	L	Y	M	P	A	K	I	G	A	FGREMLKRNI	0.999617	0.00334755	64.722	64.722	64.722	0.20164	39563000	NaN	0.999617	NaN	NaN	64.722	NaN
O15294	700	O15294	O15294	UDP-N-acetylglucosamine--peptide N-acetylglucosaminyltransferase 110 kDa subunit	OGT	PAEVAEQYSEKLAYMPHTFFIGDHANMFPHL	209	P	5	518		PAEVAEQYSE	K	L	A	Y	M	P	H	T	F	F	I	GDHANMFPHL	0.987667	0.00396407	56.327	43.65	56.327	-0.62564	222410000	0.987667	NaN	NaN	56.327	NaN	NaN
O15294	324	O15294	O15294	UDP-N-acetylglucosamine--peptide N-acetylglucosaminyltransferase 110 kDa subunit	OGT	VAEAEDCYNTALRLCPTHADSLNNLANIKRE	210	P	3	518		VAEAEDCYNT	A	L	R	L	C	P	T	H	A	D	S	LNNLANIKRE	1	0.000988015	82.102	71.617	82.102	-0.13481	18870000	1	NaN	NaN	82.102	NaN	NaN
O15327	497	O15327	O15327	Type II inositol 3,4-bisphosphate 4-phosphatase	INPP4B	LKKPPSPKSSTEESSPQDQPPVMRGQDSIPH	212	P	2	525		LKKPPSPKSS	T	E	E	S	S	P	Q	D	Q	P	P	VMRGQDSIPH	0.666604	0.0205506	44.132	18.414	44.132	2.9642	34694000	NaN	NaN	0.666604	NaN	NaN	44.132
O15355	239	O15355	O15355	Protein phosphatase 1G	PPM1G	AGQVGEPGIPTGEAGPSCSSASDKLPRVAKS	217	P	3	530		AGQVGEPGIP	T	G	E	A	G	P	S	C	S	S	A	SDKLPRVAKS	0.623111	9.92e-05	75.529	72.532	43.956	0.4874	9895000	0.4532	0.466616	0.623111	57.351	75.529	43.956
O15355	413	O15355	O15355	Protein phosphatase 1G	PPM1G	RAIGDHFYKRNKNLPPEEQMISALPDIKVLT	218	P	3	530		RAIGDHFYKR	N	K	N	L	P	P	E	E	Q	M	I	SALPDIKVLT	0.80462	0.0259113	51.591	41.106	51.591	0.099988	152030000	0.80462	NaN	NaN	51.591	NaN	NaN
O15371	22	O15371	O15371	Eukaryotic translation initiation factor 3 subunit D	EIF3D	PVIQDNPSGWGPCAVPEQFRDMPYQPFSKGD	220	P	3	534		PVIQDNPSGW	G	P	C	A	V	P	E	Q	F	R	D	MPYQPFSKGD	0.78292	0.000229435	59.598	55.563	59.598	-0.57743	89068000	0.606428	NaN	0.78292	49.626	NaN	59.598
O15371	29	O15371	O15371	Eukaryotic translation initiation factor 3 subunit D	EIF3D	SGWGPCAVPEQFRDMPYQPFSKGDRLGKVAD	221	P	4	534		SGWGPCAVPE	Q	F	R	D	M	P	Y	Q	P	F	S	KGDRLGKVAD	0.772045	1.83e-07	67.198	62.711	67.198	1.2581	57612000	NaN	0.772045	NaN	NaN	67.198	NaN
O15371	342	O15371	O15371	Eukaryotic translation initiation factor 3 subunit D	EIF3D	CLRMGKERYNFPNPNPFVEDDMDKNEIASVA	222	P	2	534		CLRMGKERYN	F	P	N	P	N	P	F	V	E	D	D	MDKNEIASVA	0.999836	2.84e-17	149.3	138.25	149.3	0.54948	1421400000	0.999836	0.992436	0.998229	149.3	75.23	149.3
O15381	649	O15381	O15381	Nuclear valosin-containing protein-like	NVL	AVANESGLNFISVKGPELLNMYVGESERAVR	224	P	3	537		AVANESGLNF	I	S	V	K	G	P	E	L	L	N	M	YVGESERAVR	1	0.0170312	50.705	39.393	50.705	-0.33977	44117000	1	NaN	NaN	50.705	NaN	NaN
O15381	151	O15381	O15381	Nuclear valosin-containing protein-like	NVL	SNTPEMEQRETTSSTPRISSKTGSIPLKTPA	225	P	4	537		SNTPEMEQRE	T	T	S	S	T	P	R	I	S	S	K	TGSIPLKTPA	0.929246	0.0216472	54.223	51.782	40.682	0.11614	169950000	NaN	0.929246	0.575025	NaN	40.682	54.223
O15381	467	O15381	O15381	Nuclear valosin-containing protein-like	NVL	RLPQAFDFCHLAHLTPGFVGADLMALCREAA	226	P	5	537		RLPQAFDFCH	L	A	H	L	T	P	G	F	V	G	A	DLMALCREAA	0.999726	0.00667078	45.957	40.177	45.957	0.18791	38110000	NaN	0.999726	NaN	NaN	45.957	NaN
O15397	538	O15397	O15397	Importin-8	IPO8	QSLISNQIQAKEYMKPHVRPIMQELLHIVRE	228	P	4	541		QSLISNQIQA	K	E	Y	M	K	P	H	V	R	P	I	MQELLHIVRE	0.55419	0.0108498	54.288	54.288	54.288	0.061706	71394000	NaN	0.542284	0.55419	NaN	47.047	54.288
O15397	513	O15397	O15397	Importin-8	IPO8	AVELAKKSLIEDKEMPVKVEAALALQSLISN	229	P	4	541		AVELAKKSLI	E	D	K	E	M	P	V	K	V	E	A	ALALQSLISN	1	0.00231223	50.144	44.6	50.144	-0.30272	13670000	1	NaN	NaN	50.144	NaN	NaN
O15431	107	O15431	O15431	High affinity copper uptake protein 1	SLC31A1	SLLRKSQVSIRYNSMPVPGPNGTILMETHKT	230	P	3	545		SLLRKSQVSI	R	Y	N	S	M	P	V	P	G	P	N	GTILMETHKT	0.993732	0.000460212	85.231	81.843	85.231	0.53393	93695000	NaN	NaN	0.993732	NaN	NaN	85.231
O15446	473	O15446	O15446	DNA-directed RNA polymerase I subunit RPA34	CD3EAP	GSTKKRKKQSQESRMPETVPQEEMPGPPLNS	231	P	3	548		GSTKKRKKQS	Q	E	S	R	M	P	E	T	V	P	Q	EEMPGPPLNS	0.999536	0.0100271	67.496	67.496	67.496	-1.8459	11430000	NaN	0.999536	NaN	NaN	67.496	NaN
O15446	477	O15446	O15446	DNA-directed RNA polymerase I subunit RPA34	CD3EAP	KRKKQSQESRMPETVPQEEMPGPPLNSESGE	232	P	3	548		KRKKQSQESR	M	P	E	T	V	P	Q	E	E	M	P	GPPLNSESGE	0.981648	2.4e-05	73.805	73.805	68.895	-0.49535	149210000	0.742963	0.981648	0.941532	60.621	68.895	73.805
O15446	482	O15446	O15446	DNA-directed RNA polymerase I subunit RPA34	CD3EAP	SQESRMPETVPQEEMPGPPLNSESGEEAPTG	233	P	3	548		SQESRMPETV	P	Q	E	E	M	P	G	P	P	L	N	SESGEEAPTG	0.602831	0.024675	47.919	41.759	47.919	-0.34099	12753000	NaN	NaN	0.602831	NaN	NaN	47.919
O15498	111	O15498	O15498	Synaptobrevin homolog YKT6	YKT6	KVLDEFSKQVDRIDWPVGSPATIHYPALDGH	234	P	6	552		KVLDEFSKQV	D	R	I	D	W	P	V	G	S	P	A	TIHYPALDGH	0.993663	0.0010902	46.54	37.702	46.54	-4.4854	11438000	NaN	NaN	0.993663	NaN	NaN	46.54
O15511	117	O15511	O15511	Actin-related protein 2/3 complex subunit 5	ARPC5	GVDLLMKYIYKGFESPSDNSSAMLLQWHEKA	235	P	4	555		GVDLLMKYIY	K	G	F	E	S	P	S	D	N	S	S	AMLLQWHEKA	1	1.79e-05	77.211	71.37	77.211	0.30447	64600000	NaN	NaN	1	NaN	NaN	77.211
O43143	763	O43143	O43143	Pre-mRNA-splicing factor ATP-dependent RNA helicase DHX15	DHX15	RTCTDIKPEWLVKIAPQYYDMSNFPQCEAKR	237	P	3	568		RTCTDIKPEW	L	V	K	I	A	P	Q	Y	Y	D	M	SNFPQCEAKR	0.999354	0.0239399	50.653	47.265	50.653	-0.44157	138660000	0.999354	NaN	0.998626	50.653	NaN	47.548
O43143	533	O43143	O43143	Pre-mRNA-splicing factor ATP-dependent RNA helicase DHX15	DHX15	GIDDLVHFDFMDPPAPETLMRALELLNYLAA	238	P	3	568		GIDDLVHFDF	M	D	P	P	A	P	E	T	L	M	R	ALELLNYLAA	0.965333	1.41e-08	110.9	110.9	91.643	0.086662	1518200000	0.963162	0.965333	NaN	110.9	91.643	NaN
O43175	99	O43175	O43175	D-3-phosphoglycerate dehydrogenase	PHGDH	DLEAATRKGILVMNTPNGNSLSAAELTCGMI	241	P	3	581		DLEAATRKGI	L	V	M	N	T	P	N	G	N	S	L	SAAELTCGMI	1	0.000553753	45.862	39.767	45.862	-0.098745	7071500	NaN	NaN	1	NaN	NaN	45.862
O43175	327	O43175	O43175	D-3-phosphoglycerate dehydrogenase	PHGDH	LTGVVNAQALTSAFSPHTKPWIGLAEALGTL	242	P	4	581		LTGVVNAQAL	T	S	A	F	S	P	H	T	K	P	W	IGLAEALGTL	1	4.37e-101	224.06	208.89	48.467	0.87668	7559700000	1	1	1	224.06	210.93	168.96
O43175	331	O43175	O43175	D-3-phosphoglycerate dehydrogenase	PHGDH	VNAQALTSAFSPHTKPWIGLAEALGTLMRAW	243	P	4	581		VNAQALTSAF	S	P	H	T	K	P	W	I	G	L	A	EALGTLMRAW	1	4.37e-101	224.06	208.89	48.467	0.87668	7936000000	1	1	1	224.06	210.93	168.96
O43181	120	O43181	O43181	NADH dehydrogenase [ubiquinone] iron-sulfur protein 4, mitochondrial	NDUFS4	ERWENPLMGWASTADPLSNMVLTFSTKEDAV	246	P	4	582		ERWENPLMGW	A	S	T	A	D	P	L	S	N	M	V	LTFSTKEDAV	0.918125	9.49e-06	50.85	50.85	50.85	-0.51294	37807000	NaN	NaN	0.918125	NaN	NaN	50.85
O43242	133	O43242	O43242	26S proteasome non-ATPase regulatory subunit 3	PSMD3	QGFFTSNNATRDFLLPFLEEPMDTEADLQFR	248	P	3	586		QGFFTSNNAT	R	D	F	L	L	P	F	L	E	E	P	MDTEADLQFR	0.665997	5.47e-09	123.82	119.01	52.198	0.15914	253380000	NaN	NaN	0.665997	NaN	NaN	123.82
O43242	359	O43242	O43242	26S proteasome non-ATPase regulatory subunit 3	PSMD3	DRLQFRQPSLKRSLMPYFLLTQAVRTGNLAK	250	P	3	586		DRLQFRQPSL	K	R	S	L	M	P	Y	F	L	L	T	QAVRTGNLAK	1	0.00279387	87.719	73.69	87.719	-0.53335	11672000	1	NaN	1	87.719	NaN	54.343
O43252	550	O43252	O43252	Bifunctional 3'-phosphoadenosine 5'-phosphosulfate synthase 1;Sulfate adenylyltransferase;Adenylyl-sulfate kinase	PAPSS1	DLYEPSHGAKVLTMAPGLITLEIVPFRVAAY	253	P	2	588		DLYEPSHGAK	V	L	T	M	A	P	G	L	I	T	L	EIVPFRVAAY	0.999997	0.0139369	66.262	53.495	66.262	-0.71344	1833100	NaN	NaN	0.999997	NaN	NaN	66.262
O43290	567	O43290	O43290	U4/U6.U5 tri-snRNP-associated protein 1	SART1	VFNATSEFCRTLGEIPTYGLAGNREEQEELM	259	P	4	593		VFNATSEFCR	T	L	G	E	I	P	T	Y	G	L	A	GNREEQEELM	1	0.00688473	46.296	36.149	46.296	-0.76425	49487000	NaN	NaN	1	NaN	NaN	46.296
O43353	277	O43353	O43353	Receptor-interacting serine/threonine-protein kinase 2	RIPK2	RARMISLIESGWAQNPDERPSFLKCLIELEP	262	P	3	610		RARMISLIES	G	W	A	Q	N	P	D	E	R	P	S	FLKCLIELEP	1	0.00111875	65.784	61.478	65.784	-1.6047	19100000	NaN	1	NaN	NaN	65.784	NaN
O43353	281	O43353	O43353	Receptor-interacting serine/threonine-protein kinase 2	RIPK2	ISLIESGWAQNPDERPSFLKCLIELEPVLRT	263	P	3	610		ISLIESGWAQ	N	P	D	E	R	P	S	F	L	K	C	LIELEPVLRT	1	0.00111875	65.784	61.478	65.784	-1.6047	19100000	NaN	1	NaN	NaN	65.784	NaN
O43390	328	O43390	O43390	Heterogeneous nuclear ribonucleoprotein R	HNRNPR	KVKVWGNVVTVEWADPVEEPDPEVMAKVKVL	265	P	2	614		KVKVWGNVVT	V	E	W	A	D	P	V	E	E	P	D	PEVMAKVKVL	0.990717	0.006396	72.209	62.839	45.864	-1.44	251660000	0.961198	0.809395	0.990717	42.375	72.209	60.918
O43390	332	O43390	O43390	Heterogeneous nuclear ribonucleoprotein R	HNRNPR	WGNVVTVEWADPVEEPDPEVMAKVKVLFVRN	266	P	3	614		WGNVVTVEWA	D	P	V	E	E	P	D	P	E	V	M	AKVKVLFVRN	0.961198	0.006396	72.209	62.839	42.375	-0.42237	251660000	0.961198	0.809395	0.85426	42.375	72.209	44.304
O43390	150	O43390	O43390	Heterogeneous nuclear ribonucleoprotein R	HNRNPR	GYTLDVTTGQRKYGGPPPDSVYSGVQPGIGT	267	P	4	614		GYTLDVTTGQ	R	K	Y	G	G	P	P	P	D	S	V	YSGVQPGIGT	0.979378	0.00315041	45.941	33.975	45.941	-2.689	85746000	NaN	0.979378	NaN	NaN	45.941	NaN
O43390	151	O43390	O43390	Heterogeneous nuclear ribonucleoprotein R	HNRNPR	YTLDVTTGQRKYGGPPPDSVYSGVQPGIGTE	268	P	4	614		YTLDVTTGQR	K	Y	G	G	P	P	P	D	S	V	Y	SGVQPGIGTE	0.979378	0.00315041	45.941	33.975	45.941	-2.689	85746000	NaN	0.979378	NaN	NaN	45.941	NaN
O43390	152	O43390	O43390	Heterogeneous nuclear ribonucleoprotein R	HNRNPR	TLDVTTGQRKYGGPPPDSVYSGVQPGIGTEV	269	P	4	614		TLDVTTGQRK	Y	G	G	P	P	P	D	S	V	Y	S	GVQPGIGTEV	0.979378	0.00315041	45.941	33.975	45.941	-2.689	85746000	NaN	0.979378	NaN	NaN	45.941	NaN
O43395	221	O43395	O43395	U4/U6 small nuclear ribonucleoprotein Prp3	PRPF3	AAELQARIQAQLALKPGLIGNANMVGLANLH	271	P	4	615		AAELQARIQA	Q	L	A	L	K	P	G	L	I	G	N	ANMVGLANLH	0.99882	0.00183839	45.558	45.558	42.347	-1.6366	68298000	0.99882	NaN	NaN	45.558	NaN	NaN
O43491	662	O43491	O43491	Band 4.1-like protein 2	EPB41L2	SISELKRNFMESTPEPRPNEWEKRRITPLSL	274	P	3	632		SISELKRNFM	E	S	T	P	E	P	R	P	N	E	W	EKRRITPLSL	0.980485	1.14e-05	103.43	93.921	59.261	0.40599	57944000	0.980485	0.974823	NaN	59.261	103.43	NaN
O43491	664	O43491	O43491	Band 4.1-like protein 2	EPB41L2	SELKRNFMESTPEPRPNEWEKRRITPLSLQT	275	P	3	632		SELKRNFMES	T	P	E	P	R	P	N	E	W	E	K	RRITPLSLQT	0.980485	1.14e-05	103.43	93.921	59.261	0.40599	57944000	0.980485	0.974823	NaN	59.261	103.43	NaN
O43660	59	O43660	O43660	Pleiotropic regulator 1	PLRG1	MAIKLRNEYGPVLHMPTSKENLKEKGPQNAT	278	P	4	657		MAIKLRNEYG	P	V	L	H	M	P	T	S	K	E	N	LKEKGPQNAT	0.972604	0.02086	51.695	44.287	51.695	-0.21693	9030900	0.972604	NaN	NaN	51.695	NaN	NaN
O43663	87	O43663	O43663	Protein regulator of cytokinesis 1	PRC1	CQKELNTLCSELHVEPFQEEGETTILQLEKD	285	P	3	658		CQKELNTLCS	E	L	H	V	E	P	F	Q	E	E	G	ETTILQLEKD	1	0.00917189	45.957	42.196	45.957	-0.51665	8510000	1	NaN	NaN	45.957	NaN	NaN
O43670	86	O43670	O43670	BUB3-interacting and GLEBS motif-containing protein ZNF207	ZNF207	GRTDIELEIYGMEGIPEKDMDERRRLLEQKT	286	P	3	660		GRTDIELEIY	G	M	E	G	I	P	E	K	D	M	D	ERRRLLEQKT	1	6.14e-07	100.21	89.52	100.21	-1.6924	470710000	1	1	1	90.972	93.269	100.21
O43674	167	O43674	O43674	NADH dehydrogenase [ubiquinone] 1 beta subcomplex subunit 5, mitochondrial	NDUFB5	KELEVRKLMHVRGDGPWYYYETIDKELIDHS	287	P	5	661		KELEVRKLMH	V	R	G	D	G	P	W	Y	Y	Y	E	TIDKELIDHS	1	5.76e-05	82.849	80.968	82.849	-0.00073641	489190000	1	1	0.999923	72.145	82.849	47.099
O43681	140	O43681	O43681	ATPase ASNA1	ASNA1	LSMGKKMMQEAMSAFPGIDEAMSYAEVMRLV	288	P	3	665		LSMGKKMMQE	A	M	S	A	F	P	G	I	D	E	A	MSYAEVMRLV	1	0.000229887	57.147	56.96	57.147	0.39996	18313000	NaN	NaN	1	NaN	NaN	57.147
O43681	115	O43681	O43681	ATPase ASNA1	ASNA1	LFAMEIDPSLGVAELPDEFFEEDNMLSMGKK	289	P	4	665		LFAMEIDPSL	G	V	A	E	L	P	D	E	F	F	E	EDNMLSMGKK	0.999738	2.03e-06	59.18	59.18	59.18	-0.85212	122430000	0.951993	0.999738	NaN	42.863	59.18	NaN
O43707	616	O43707	O43707	Alpha-actinin-4	ACTN4	NHIKLSGSNPYTTVTPQIINSKWEKVQQLVP	291	P	2	668		NHIKLSGSNP	Y	T	T	V	T	P	Q	I	I	N	S	KWEKVQQLVP	1	0.000869881	94.507	71.389	94.507	-3.0902	0	NaN	NaN	1	NaN	NaN	94.507
O43707	252	O43707	O43707	Alpha-actinin-4	ACTN4	IPKMLDAEDIVNTARPDEKAIMTYVSSFYHA	292	P	4	668		IPKMLDAEDI	V	N	T	A	R	P	D	E	K	A	I	MTYVSSFYHA	1	0.000580207	49.001	43.416	49.001	-2.9346	46261000	NaN	NaN	1	NaN	NaN	49.001
O43747	233	O43747	O43747	AP-1 complex subunit gamma-1	AP1G1	QLVRILKNLIMSGYSPEHDVSGISDPFLQVR	294	P	4	677		QLVRILKNLI	M	S	G	Y	S	P	E	H	D	V	S	GISDPFLQVR	1	7.67e-05	98.299	91.554	88.571	-0.202	225380000	1	0.999954	1	98.299	92.275	88.571
O43768	83	O43768	O43768	Alpha-endosulfine	ENSA	GDYNMAKAKMKNKQLPSAGPDKNLVTGDHIP	295	P	5	684		GDYNMAKAKM	K	N	K	Q	L	P	S	A	G	P	D	KNLVTGDHIP	0.877365	0.027701	45.862	30.343	45.862	0.85188	51978000	NaN	NaN	0.877365	NaN	NaN	45.862
O43768	87	O43768	O43768	Alpha-endosulfine	ENSA	MAKAKMKNKQLPSAGPDKNLVTGDHIPTPQD	296	P	5	684		MAKAKMKNKQ	L	P	S	A	G	P	D	K	N	L	V	TGDHIPTPQD	0.877109	0.027701	45.862	30.343	45.862	0.85188	51978000	NaN	NaN	0.877109	NaN	NaN	45.862
O43776	467	O43776	O43776	Asparagine--tRNA ligase, cytoplasmic	NARS	CPEDSRLTESVDVLMPNVGEIVGGSMRIFDS	297	P	2	686		CPEDSRLTES	V	D	V	L	M	P	N	V	G	E	I	VGGSMRIFDS	1	1.47e-10	143.93	124.73	143.93	-0.73641	30615000	1	NaN	NaN	143.93	NaN	NaN
O43776	512	O43776	O43776	Asparagine--tRNA ligase, cytoplasmic	NARS	TPYYWYTDQRKYGTCPHGGYGLGLERFLTWI	298	P	3	686		TPYYWYTDQR	K	Y	G	T	C	P	H	G	G	Y	G	LGLERFLTWI	1	0.0304705	52.522	49.235	52.522	-0.5091	28743000	1	NaN	NaN	52.522	NaN	NaN
O43824	406	O43824	O43824	Putative GTP-binding protein 6	GTPBP6	LQKCSVLSTLRGLQLPAPLLDSMVEVHNKVD	301	P	4	698		LQKCSVLSTL	R	G	L	Q	L	P	A	P	L	L	D	SMVEVHNKVD	0.513879	3.03e-07	58.421	54.5	49.585	-1.2551	486850000	0.513879	0	0.489809	49.585	NaN	58.421
O43824	408	O43824	O43824	Putative GTP-binding protein 6	GTPBP6	KCSVLSTLRGLQLPAPLLDSMVEVHNKVDLV	302	P	3	698		KCSVLSTLRG	L	Q	L	P	A	P	L	L	D	S	M	VEVHNKVDLV	0.991615	9.68e-10	82.384	76.939	82.384	0.26476	2301700000	0.655868	0.991615	0.925986	48.909	82.384	72.491
O60216	448	O60216	O60216	Double-strand-break repair protein rad21 homolog	RAD21	QHQQRDVIDEPIIEEPSRLQESVMEASRTNI	310	P	3	714		QHQQRDVIDE	P	I	I	E	E	P	S	R	L	Q	E	SVMEASRTNI	0.99999	9.81e-08	112.37	100.29	112.37	-0.8602	625540000	0.999781	NaN	0.99999	79.783	NaN	112.37
O60232	145	O60232	O60232	Sjoegren syndrome/scleroderma autoantigen 1	SSSCA1	AGLKAAQGPPAPAVPPNTDVMACTQTALLQK	313	P	3	717		AGLKAAQGPP	A	P	A	V	P	P	N	T	D	V	M	ACTQTALLQK	0.855027	0.000420835	68.231	53.103	68.231	-0.59129	28358000	0.855027	NaN	NaN	68.231	NaN	NaN
O60232	15	O60232	O60232	Sjoegren syndrome/scleroderma autoantigen 1	SSSCA1	_MALNGAEVDDFSWEPPTEAETKVLQARRER	314	P	2	717		_MALNGAEVD	D	F	S	W	E	P	P	T	E	A	E	TKVLQARRER	0.756108	0.000450761	59.864	50.577	59.864	-4.3045	7627700	NaN	NaN	0.756108	NaN	NaN	59.864
O60244	1237	O60244	O60244	Mediator of RNA polymerase II transcription subunit 14	MED14	RIIQQETLQLINSNEPGVIMFKTDALKCRVA	318	P	4	722		RIIQQETLQL	I	N	S	N	E	P	G	V	I	M	F	KTDALKCRVA	1	0.00653149	46.862	41.26	46.862	0.057364	35629000	NaN	NaN	1	NaN	NaN	46.862
O60264	470	O60264	O60264	SWI/SNF-related matrix-associated actin-dependent regulator of chromatin subfamily A member 5	SMARCA5	KCCNHPYLFDGAEPGPPYTTDMHLVTNSGKM	321	P	4	726		KCCNHPYLFD	G	A	E	P	G	P	P	Y	T	T	D	MHLVTNSGKM	0.548311	8.69e-05	87.489	85.607	87.489	-1.2317	50551000	0.548311	NaN	NaN	87.489	NaN	NaN
O60264	733	O60264	O60264	SWI/SNF-related matrix-associated actin-dependent regulator of chromatin subfamily A member 5	SMARCA5	DYREKQKIAFTEWIEPPKRERKANYAVDAYF	322	P	3	726		DYREKQKIAF	T	E	W	I	E	P	P	K	R	E	R	KANYAVDAYF	1	0.0093026	75.819	60.275	75.819	0.16719	140500000	1	NaN	NaN	75.819	NaN	NaN
O60264	734	O60264	O60264	SWI/SNF-related matrix-associated actin-dependent regulator of chromatin subfamily A member 5	SMARCA5	YREKQKIAFTEWIEPPKRERKANYAVDAYFR	323	P	3	726		YREKQKIAFT	E	W	I	E	P	P	K	R	E	R	K	ANYAVDAYFR	1	0.0093026	75.819	60.275	75.819	0.16719	140500000	1	NaN	NaN	75.819	NaN	NaN
O60271	349	O60271	O60271	C-Jun-amino-terminal kinase-interacting protein 4	SPAG9	ENEEKSEVQAIIESTPELDMDKDLSGYKGSS	324	P	4	729		ENEEKSEVQA	I	I	E	S	T	P	E	L	D	M	D	KDLSGYKGSS	1	0.00302028	48.085	43.81	48.085	-0.0088918	17418000	NaN	NaN	1	NaN	NaN	48.085
O60306	7	O60306	O60306	Intron-binding protein aquarius	AQR	_________MAAPAQPKKIVAPTVSQINAEF	329	P	1	741		_________M	A	A	P	A	Q	P	K	K	I	V	A	PTVSQINAEF	0.99791	0.0358193	42.229	10.939	42.229	0.82357	32603000	0.99791	NaN	NaN	42.229	NaN	NaN
O60306	525	O60306	O60306	Intron-binding protein aquarius	AQR	MAQPIVAFTVVEVAKPNIGENWPTRVRADVT	330	P	3	741		MAQPIVAFTV	V	E	V	A	K	P	N	I	G	E	N	WPTRVRADVT	1	0.000266213	73.981	67.257	73.981	0.10032	78189000	1	NaN	NaN	73.981	NaN	NaN
O60306	532	O60306	O60306	Intron-binding protein aquarius	AQR	FTVVEVAKPNIGENWPTRVRADVTINLNVRD	331	P	3	741		FTVVEVAKPN	I	G	E	N	W	P	T	R	V	R	A	DVTINLNVRD	1	0.000266213	73.981	67.257	73.981	0.10032	78189000	1	NaN	NaN	73.981	NaN	NaN
O60306	494	O60306	O60306	Intron-binding protein aquarius	AQR	YEIRQDIEDSVSRMKPWQSEYGGVVFGGWAR	332	P	3	741		YEIRQDIEDS	V	S	R	M	K	P	W	Q	S	E	Y	GGVVFGGWAR	1	0.0156948	71.601	63	71.601	-0.93388	75582000	1	NaN	NaN	71.601	NaN	NaN
O60315	10	O60315	O60315	Zinc finger E-box-binding homeobox 2	ZEB2	______MKQPIMADGPRCKRRKQANPRRKNV	334	P	2	745		______MKQP	I	M	A	D	G	P	R	C	K	R	R	KQANPRRKNV	1	0.0228996	40.352	9.7815	40.352	-1.5894	14774000	NaN	1	NaN	NaN	40.352	NaN
O60341	105	O60341	O60341	Lysine-specific histone demethylase 1A	KDM1A	VPGSATPMETGIAETPEGRRTSRRKRAKVEY	335	P	4	750		VPGSATPMET	G	I	A	E	T	P	E	G	R	R	T	SRRKRAKVEY	0.842767	5.84e-05	48.08	40.543	48.08	0.66749	159630000	NaN	NaN	0.842767	NaN	NaN	48.08
O60341	152	O60341	O60341	Lysine-specific histone demethylase 1A	KDM1A	SEEERNAKAEKEKKLPPPPPQAPPEEENESE	337	P	3	750		SEEERNAKAE	K	E	K	K	L	P	P	P	P	P	Q	APPEEENESE	0.698501	0.00501276	43.24	41.713	43.24	-1.0677	51582000	0.698501	NaN	0.678031	43.24	NaN	42.571
O60341	153	O60341	O60341	Lysine-specific histone demethylase 1A	KDM1A	EEERNAKAEKEKKLPPPPPQAPPEEENESEP	338	P	3	750		EEERNAKAEK	E	K	K	L	P	P	P	P	P	Q	A	PPEEENESEP	0.680387	0.00501276	43.24	41.713	43.24	-1.0677	51582000	0.680387	NaN	0.659621	43.24	NaN	42.571
O60341	154	O60341	O60341	Lysine-specific histone demethylase 1A	KDM1A	EERNAKAEKEKKLPPPPPQAPPEEENESEPE	339	P	3	750		EERNAKAEKE	K	K	L	P	P	P	P	P	Q	A	P	PEEENESEPE	0.676257	0.00501276	43.24	41.713	43.24	-1.0677	51582000	0.676257	NaN	0.654849	43.24	NaN	42.571
O60341	155	O60341	O60341	Lysine-specific histone demethylase 1A	KDM1A	ERNAKAEKEKKLPPPPPQAPPEEENESEPEE	340	P	3	750		ERNAKAEKEK	K	L	P	P	P	P	P	Q	A	P	P	EEENESEPEE	0.675824	0.00501276	43.24	41.713	43.24	-1.0677	51582000	0.675824	NaN	0.654184	43.24	NaN	42.571
O60341	156	O60341	O60341	Lysine-specific histone demethylase 1A	KDM1A	RNAKAEKEKKLPPPPPQAPPEEENESEPEEP	341	P	3	750		RNAKAEKEKK	L	P	P	P	P	P	Q	A	P	P	E	EENESEPEEP	0.675824	0.00501276	43.24	41.713	43.24	-1.0677	51582000	0.675824	NaN	0.654184	43.24	NaN	42.571
O60341	159	O60341	O60341	Lysine-specific histone demethylase 1A	KDM1A	KAEKEKKLPPPPPQAPPEEENESEPEEPSGV	342	P	3	750		KAEKEKKLPP	P	P	P	Q	A	P	P	E	E	E	N	ESEPEEPSGV	0.675824	0.00501276	43.24	41.713	43.24	-1.0677	51582000	0.675824	NaN	0.654184	43.24	NaN	42.571
O60341	160	O60341	O60341	Lysine-specific histone demethylase 1A	KDM1A	AEKEKKLPPPPPQAPPEEENESEPEEPSGVE	343	P	3	750		AEKEKKLPPP	P	P	Q	A	P	P	E	E	E	N	E	SEPEEPSGVE	0.675824	0.00501276	43.24	41.713	43.24	-1.0677	51582000	0.675824	NaN	0.654184	43.24	NaN	42.571
O60361;P15531;P22392	81;96;96	O60361;P15531;P22392	P22392	Putative nucleoside diphosphate kinase;Nucleoside diphosphate kinase A;Nucleoside diphosphate kinase B	NME2P1;NME1;NME2	LNVVKTGRVMLGETNPADSKPGTIRGDFCIQ	345	P	3	1742;1937;755		LNVVKTGRVM	L	G	E	T	N	P	A	D	S	K	P	GTIRGDFCIQ	1	0.0175805	56.95	38.069	56.95	-0.35288	21618000	NaN	1	NaN	NaN	56.95	NaN
O60361;P15531;P22392	86;101;101	O60361;P15531;P22392	P22392	Putative nucleoside diphosphate kinase;Nucleoside diphosphate kinase A;Nucleoside diphosphate kinase B	NME2P1;NME1;NME2	TGRVMLGETNPADSKPGTIRGDFCIQVGRNI	346	P	3	1742;1937;755		TGRVMLGETN	P	A	D	S	K	P	G	T	I	R	G	DFCIQVGRNI	1	0.0175805	56.95	38.069	56.95	-0.35288	21618000	NaN	1	NaN	NaN	56.95	NaN
O60361;P22392	57;72	O60361;P22392	P22392	Putative nucleoside diphosphate kinase;Nucleoside diphosphate kinase B	NME2P1;NME2	DRPFFPGLVKYMNSGPVVAMVWEGLNVVKTG	347	P	3	1937;755		DRPFFPGLVK	Y	M	N	S	G	P	V	V	A	M	V	WEGLNVVKTG	1	0.00209829	70.944	67.34	44.342	-0.36163	404850000	1	1	1	70.944	57.267	56.936
O60488;O95573	675;684	O60488;O95573	O60488	Long-chain-fatty-acid--CoA ligase 4;Long-chain-fatty-acid--CoA ligase 3	ACSL4;ACSL3	ASLEKFEIPVKIRLSPEPWTPETGLVTDAFK;MKLERFEIPIKVRLSPEPWTPETGLVTDAFK	350	P	2	1242;763		ASLEKFEIPV	K	I	R	L	S	P	E	P	W	T	P	ETGLVTDAFK	0.993259	0.00138607	113.76	91.224	107.14	-0.35569	366380000	0.993259	0.952454	0.808275	107.14	113.76	74.475
O60488;O95573	677;686	O60488;O95573	O60488	Long-chain-fatty-acid--CoA ligase 4;Long-chain-fatty-acid--CoA ligase 3	ACSL4;ACSL3	LEKFEIPVKIRLSPEPWTPETGLVTDAFKLK;LERFEIPIKVRLSPEPWTPETGLVTDAFKLK	351	P	2	1242;763		LEKFEIPVKI	R	L	S	P	E	P	W	T	P	E	T	GLVTDAFKLK	0.999983	0.00138607	113.76	91.224	113.76	1.2767	437490000	0.999853	0.999983	0.990569	107.14	113.76	74.475
O60488;O95573	680;689	O60488;O95573	O60488	Long-chain-fatty-acid--CoA ligase 4;Long-chain-fatty-acid--CoA ligase 3	ACSL4;ACSL3	FEIPIKVRLSPEPWTPETGLVTDAFKLKRKE;FEIPVKIRLSPEPWTPETGLVTDAFKLKRKE	352	P	2	1242;763		FEIPIKVRLS	P	E	P	W	T	P	E	T	G	L	V	TDAFKLKRKE	0.920686	0.0175378	83.53	57.401	79.466	0.89139	160720000	0.506606	0.920686	NaN	65.25	83.53	NaN
O60508	83	O60508	O60508	Pre-mRNA-processing factor 17	CDC40	TGVHLDPAVKEVQYNPTYETMFAPEFGPENP	355	P	3	771		TGVHLDPAVK	E	V	Q	Y	N	P	T	Y	E	T	M	FAPEFGPENP	0.992113	0.000458611	70.917	68.089	70.917	-1.5799	131620000	0.986586	0.9837	0.992113	70.76	55.705	70.917
O60518	10	O60518	O60518	Ran-binding protein 6	RANBP6	______MAATASAGVPATVSEKQEFYQLLKN	356	P	2	774		______MAAT	A	S	A	G	V	P	A	T	V	S	E	KQEFYQLLKN	1	0.00781786	61.353	36.499	61.353	-1.399	146630000	1	NaN	NaN	61.353	NaN	NaN
O60551	406	O60551	O60551	Glycylpeptide N-tetradecanoyltransferase 2	NMT2	SPNGKLTDFLSFYTLPSTVMHHPAHKSLKAA	357	P	4	778		SPNGKLTDFL	S	F	Y	T	L	P	S	T	V	M	H	HPAHKSLKAA	0.916931	0.00629292	49.592	46.583	49.592	-0.01989	24809000	NaN	0.916931	NaN	NaN	49.592	NaN
O60563	605	O60563	O60563	Cyclin-T1	CCNT1	KIAKSTKSSSLNFSFPSLPTMGQMPGHSSDT	358	P	3	779		KIAKSTKSSS	L	N	F	S	F	P	S	L	P	T	M	GQMPGHSSDT	0.610904	1.39e-07	74.282	70.982	74.282	-1.3309	38218000	0.610904	NaN	0.472361	74.282	NaN	51.444
O60573	104	O60573	O60573	Eukaryotic translation initiation factor 4E type 2	EIF4E2	ASVEQFWRFYSHMVRPGDLTGHSDFHLFKEG	362	P	5	782		ASVEQFWRFY	S	H	M	V	R	P	G	D	L	T	G	HSDFHLFKEG	1	6.23e-05	79.568	71.946	79.568	-0.45778	53702000	1	NaN	NaN	79.568	NaN	NaN
O60664	413	O60664	O60664	Perilipin-3	PLIN3	REALDHMVEYVAQNTPVTWLVGPFAPGITEK	363	P	3	792		REALDHMVEY	V	A	Q	N	T	P	V	T	W	L	V	GPFAPGITEK	0.991954	0.0081747	50.705	45.385	50.705	-4.16	0	NaN	NaN	0.991954	NaN	NaN	50.705
O60664	205	O60664	O60664	Perilipin-3	PLIN3	DTVLGKSEEWADNHLPLTDAELARIATSLDG	364	P	3	792		DTVLGKSEEW	A	D	N	H	L	P	L	T	D	A	E	LARIATSLDG	1	3.53e-05	65.33	55.282	65.33	-2.8224	0	NaN	1	NaN	NaN	65.33	NaN
O60716	160	O60716	O60716	Catenin delta-1	CTNND1	VKTVTTRTVQPVAMGPDGLPVDASSVSNNYI	366	P	4	802		VKTVTTRTVQ	P	V	A	M	G	P	D	G	L	P	V	DASSVSNNYI	0.572232	0.00707591	40.064	36.105	40.064	0.76494	19832000	NaN	0	0.572232	NaN	NaN	40.064
O60739;P41567	77;77	O60739;P41567	P41567	Eukaryotic translation initiation factor 1b;Eukaryotic translation initiation factor 1	EIF1B;EIF1	AFKKKFACNGTVIEHPEYGEVIQLQGDQRKN	368	P	4	2355;805		AFKKKFACNG	T	V	I	E	H	P	E	Y	G	E	V	IQLQGDQRKN	1	0.0142196	45.011	42.955	45.011	-0.3393	33129000	1	NaN	NaN	45.011	NaN	NaN
O60762	41	O60762	O60762	Dolichol-phosphate mannosyltransferase subunit 1	DPM1	KYSVLLPTYNERENLPLIVWLLVKSFSESGI	369	P	2	807		KYSVLLPTYN	E	R	E	N	L	P	L	I	V	W	L	LVKSFSESGI	0.990911	0.0139857	63.16	57.5	63.16	-2.985	0	NaN	NaN	0.990911	NaN	NaN	63.16
O60763	261	O60763	O60763	General vesicular transport factor p115	USO1	NQNFFKEGSYIQRMKPWFEVGDENSGWSAQK	371	P	2	808		NQNFFKEGSY	I	Q	R	M	K	P	W	F	E	V	G	DENSGWSAQK	1	0.0118163	67.275	56.329	67.275	-2.3594	0	1	NaN	NaN	67.275	NaN	NaN
O60814;P06899;P62807;Q8N257;Q99880	51;51;51;51;51	O60814;P06899;P62807;Q8N257;Q99880	O60814	Histone H2B type 1-K;Histone H2B type 1-J;Histone H2B type 1-C/E/F/G/I;Histone H2B type 3-B;Histone H2B type 1-L	HIST1H2BK;HIST1H2BJ;HIST1H2BC;HIST3H2BB;HIST1H2BL	ESYSIYVYKVLKQVHPDTGISSKAMGIMNSF;ESYSVYVYKVLKQVHPDTGISSKAMGIMNSF	373	P	3	1444;3015;5656;7295;813		ESYSIYVYKV	L	K	Q	V	H	P	D	T	G	I	S	SKAMGIMNSF	1	0.000126297	64.733	54.026	64.733	1.8575	0	NaN	1	1	NaN	64.733	54.152
O60828	206	O60828	O60828	Polyglutamine-binding protein 1	PQBP1	KKAVSRKDEELDPMDPSSYSDAPRGTWSTGL	376	P	4	816		KKAVSRKDEE	L	D	P	M	D	P	S	S	Y	S	D	APRGTWSTGL	0.549888	0.0179986	44.052	36.837	44.052	2.1889	73381000	NaN	NaN	0.549888	NaN	NaN	44.052
O60830;Q99595	8;8	O60830;Q99595	O60830	Mitochondrial import inner membrane translocase subunit Tim17-B;Mitochondrial import inner membrane translocase subunit Tim17-A	TIMM17B;TIMM17A	________MEEYAREPCPWRIVDDCGGAFTM	377	P	2	7235;817		________ME	E	Y	A	R	E	P	C	P	W	R	I	VDDCGGAFTM	1	0.00924906	51.436	45.195	42.336	-0.98157	98811000	1	NaN	NaN	51.436	NaN	NaN
O60830;Q99595	10;10	O60830;Q99595	O60830	Mitochondrial import inner membrane translocase subunit Tim17-B;Mitochondrial import inner membrane translocase subunit Tim17-A	TIMM17B;TIMM17A	______MEEYAREPCPWRIVDDCGGAFTMGT;______MEEYAREPCPWRIVDDCGGAFTMGV	378	P	2	7235;817		______MEEY	A	R	E	P	C	P	W	R	I	V	D	DCGGAFTMGT	1	0.00924906	51.436	45.195	42.336	-0.98157	98811000	1	NaN	NaN	51.436	NaN	NaN
O60832	97	O60832	O60832	H/ACA ribonucleoprotein complex subunit 4	DKC1	EIGDYIRTGFINLDKPSNPSSHEVVAWIRRI	380	P	4	819		EIGDYIRTGF	I	N	L	D	K	P	S	N	P	S	S	HEVVAWIRRI	1	0.0288071	53.342	41.028	53.342	2.2171	63639000	1	NaN	NaN	53.342	NaN	NaN
O60832	100	O60832	O60832	H/ACA ribonucleoprotein complex subunit 4	DKC1	DYIRTGFINLDKPSNPSSHEVVAWIRRILRV	381	P	4	819		DYIRTGFINL	D	K	P	S	N	P	S	S	H	E	V	VAWIRRILRV	1	0.0288071	53.342	41.028	53.342	2.2171	63639000	1	NaN	NaN	53.342	NaN	NaN
O60832	78	O60832	O60832	H/ACA ribonucleoprotein complex subunit 4	DKC1	NVRTTHYTPLACGSNPLKREIGDYIRTGFIN	382	P	3	819		NVRTTHYTPL	A	C	G	S	N	P	L	K	R	E	I	GDYIRTGFIN	0.996185	0.0202876	57.434	53.192	57.434	0.33569	111750000	0.996185	NaN	NaN	57.434	NaN	NaN
O60885	531	O60885	O60885	Bromodomain-containing protein 4	BRD4	EQLKAVHEQLAALSQPQQNKPKKKEKDKKEK	386	P	4	826		EQLKAVHEQL	A	A	L	S	Q	P	Q	Q	N	K	P	KKKEKDKKEK	1	0.0105913	100.55	88.575	48.477	0.13585	111680000	1	0	1	63.337	NaN	100.55
O60885	536	O60885	O60885	Bromodomain-containing protein 4	BRD4	VHEQLAALSQPQQNKPKKKEKDKKEKKKEKH	387	P	4	826		VHEQLAALSQ	P	Q	Q	N	K	P	K	K	K	E	K	DKKEKKKEKH	1	0.000365461	105.89	91.116	48.477	0.13585	457010000	1	0.998576	1	63.337	105.89	100.55
O60888	152	O60888	O60888	Protein CutA	CUTA	VRSVHPYEVAEVIALPVEQGNFPYLQWVRQV	388	P	2	827		VRSVHPYEVA	E	V	I	A	L	P	V	E	Q	G	N	FPYLQWVRQV	1	0.0033675	100.45	83.568	88.73	-0.12806	1416400000	1	1	0.999957	100.45	88.73	53.998
O60888	159	O60888	O60888	Protein CutA	CUTA	EVAEVIALPVEQGNFPYLQWVRQVTESVSDS	389	P	2	827		EVAEVIALPV	E	Q	G	N	F	P	Y	L	Q	W	V	RQVTESVSDS	1	0.000122199	100.45	83.568	100.45	1.5971	1660800000	1	1	0.999956	100.45	88.79	72.805
O75027	182	O75027	O75027	ATP-binding cassette sub-family B member 7, mitochondrial	ABCB7	SLNQMSGNMLNLSDAPNTVATMATAVLIGYG	391	P	3	841		SLNQMSGNML	N	L	S	D	A	P	N	T	V	A	T	MATAVLIGYG	1	0.000279148	44.369	39.512	44.369	-0.64572	10409000	1	NaN	NaN	44.369	NaN	NaN
O75116	11	O75116	O75116	Rho-associated protein kinase 2	ROCK2	_____MSRPPPTGKMPGAPETAPGDGAGASR	393	P	2	861		_____MSRPP	P	T	G	K	M	P	G	A	P	E	T	APGDGAGASR	1	0.00429867	112.51	96.616	112.51	-1.0661	91649000	0.80168	0.999996	1	40.404	83.314	112.51
O75122	1009	O75122	O75122	CLIP-associating protein 2	CLASP2	SQTALDNKASLLHSMPTHSSPRSRDYNPYNY	394	P	5	863		SQTALDNKAS	L	L	H	S	M	P	T	H	S	S	P	RSRDYNPYNY	0.967166	3.94e-05	108.88	102.38	108.88	0.68415	392650000	0.966549	0.967166	0.831379	107.76	108.88	90.907
O75122	1014	O75122	O75122	CLIP-associating protein 2	CLASP2	DNKASLLHSMPTHSSPRSRDYNPYNYSDSIS	395	P	4	863		DNKASLLHSM	P	T	H	S	S	P	R	S	R	D	Y	NPYNYSDSIS	0.629778	3.73e-05	63.803	58.202	52.721	-0.24533	138010000	0.554801	0.629778	NaN	63.803	52.721	NaN
O75143	381	O75143	O75143	Autophagy-related protein 13	ATG13	LETIFVRKVGAFVNKPINQVTLTSLDIPFAM	398	P	3	869		LETIFVRKVG	A	F	V	N	K	P	I	N	Q	V	T	LTSLDIPFAM	0.999931	0.0151463	40.669	21.95	40.669	-1.2742	72845000	0.999931	NaN	NaN	40.669	NaN	NaN
O75143	399	O75143	O75143	Autophagy-related protein 13	ATG13	QVTLTSLDIPFAMFAPKNLELEDTDPMVNPP	400	P	3	869		QVTLTSLDIP	F	A	M	F	A	P	K	N	L	E	L	EDTDPMVNPP	0.500034	0.0151463	40.669	21.95	40.669	-1.2742	72845000	0.500034	NaN	NaN	40.669	NaN	NaN
O75153	316	O75153	O75153	Clustered mitochondria protein homolog	CLUH	QKKRVQRHPFERIATPFQVYSWTAPQAEHAM	402	P	3	877		QKKRVQRHPF	E	R	I	A	T	P	F	Q	V	Y	S	WTAPQAEHAM	1	0.0103503	40.197	34.148	40.197	-0.1633	77120000	NaN	1	NaN	NaN	40.197	NaN
O75153	325	O75153	O75153	Clustered mitochondria protein homolog	CLUH	FERIATPFQVYSWTAPQAEHAMDCVRAEDAY	403	P	3	877		FERIATPFQV	Y	S	W	T	A	P	Q	A	E	H	A	MDCVRAEDAY	1	0.00016854	75.112	67.666	40.197	-0.1633	212180000	NaN	1	NaN	NaN	75.112	NaN
O75153	225	O75153	O75153	Clustered mitochondria protein homolog	CLUH	KPLQCLKVLTMSGWNPPPGNRKMHGDLMYLF	404	P	2	877		KPLQCLKVLT	M	S	G	W	N	P	P	P	G	N	R	KMHGDLMYLF	0.986015	0.029978	85.533	74.878	85.533	0.18694	9408100	0.986015	0.63325	NaN	85.533	76.228	NaN
O75153	226	O75153	O75153	Clustered mitochondria protein homolog	CLUH	PLQCLKVLTMSGWNPPPGNRKMHGDLMYLFV	405	P	2	877		PLQCLKVLTM	S	G	W	N	P	P	P	G	N	R	K	MHGDLMYLFV	0.986015	0.029978	85.533	74.878	85.533	0.18694	9408100	0.986015	0.63325	NaN	85.533	76.228	NaN
O75153	227	O75153	O75153	Clustered mitochondria protein homolog	CLUH	LQCLKVLTMSGWNPPPGNRKMHGDLMYLFVI	406	P	2	877		LQCLKVLTMS	G	W	N	P	P	P	G	N	R	K	M	HGDLMYLFVI	0.7335	0.029978	76.228	62.458	76.228	-0.20845	0	NaN	0.7335	NaN	NaN	76.228	NaN
O75155	371	O75155	O75155	Cullin-associated NEDD8-dissociated protein 2	CAND2	AKCIAALISSRPDLLPDFHCTLAPVLIRRFK	408	P	3	879		AKCIAALISS	R	P	D	L	L	P	D	F	H	C	T	LAPVLIRRFK	0.99823	0.0294918	44.196	27.797	44.196	2.0789	318300000	0.99823	NaN	NaN	44.196	NaN	NaN
O75155	379	O75155	O75155	Cullin-associated NEDD8-dissociated protein 2	CAND2	SSRPDLLPDFHCTLAPVLIRRFKEREENVKA	409	P	3	879		SSRPDLLPDF	H	C	T	L	A	P	V	L	I	R	R	FKEREENVKA	0.999655	0.0294918	44.196	27.797	44.196	2.0789	318300000	0.999655	NaN	NaN	44.196	NaN	NaN
O75170	438	O75170	O75170	Serine/threonine-protein phosphatase 6 regulatory subunit 2	PPP6R2	NGNRSLETPQPAASLPDNTMVTHLFQKCCLV	411	P	3	885		NGNRSLETPQ	P	A	A	S	L	P	D	N	T	M	V	THLFQKCCLV	0.904849	0.00860358	50.055	42.609	50.055	-0.8066	69235000	0.904849	NaN	NaN	50.055	NaN	NaN
O75175	647	O75175	O75175	CCR4-NOT transcription complex subunit 3	CNOT3	ERIRQYLPRNPCPTPPYHHQMPPPHSDTVEF	413	P	5	886		ERIRQYLPRN	P	C	P	T	P	P	Y	H	H	Q	M	PPPHSDTVEF	0.798235	9.49e-06	103.84	101.56	88.836	0.089657	301560000	0	0.798235	0.738385	NaN	103.84	85.777
O75306	229	O75306	O75306	NADH dehydrogenase [ubiquinone] iron-sulfur protein 2, mitochondrial	NDUFS2	YERVSGARMHAAYIRPGGVHQDLPLGLMDDI	418	P	5	901		YERVSGARMH	A	A	Y	I	R	P	G	G	V	H	Q	DLPLGLMDDI	0.986656	0.00950168	100.42	100.42	100.42	0.045507	317460000	0.986656	NaN	NaN	100.42	NaN	NaN
O75312	420	O75312	O75312	Zinc finger protein ZPR1	ZPR1	MDDPAGNSYLQNVYAPEDDPEMKVERYKRTF	419	P	4	902		MDDPAGNSYL	Q	N	V	Y	A	P	E	D	D	P	E	MKVERYKRTF	0.61216	0.000103994	86.982	84.892	86.982	-0.072121	36908000	0.566713	0.61216	NaN	45.125	86.982	NaN
O75323	178	O75323	O75323	Protein NipSnap homolog 2	GBAS	SRKNQLLLEFSFWNEPVPRSGPNIYELRSYQ	421	P	3	905		SRKNQLLLEF	S	F	W	N	E	P	V	P	R	S	G	PNIYELRSYQ	1	1.01e-33	215.53	201.5	75.445	0.83469	332900000	1	1	NaN	75.445	215.53	NaN
O75323	180	O75323	O75323	Protein NipSnap homolog 2	GBAS	KNQLLLEFSFWNEPVPRSGPNIYELRSYQLR	422	P	3	905		KNQLLLEFSF	W	N	E	P	V	P	R	S	G	P	N	IYELRSYQLR	1	1.01e-33	215.53	201.5	75.445	0.83469	332900000	1	1	NaN	75.445	215.53	NaN
O75369	1273	O75369	O75369	Filamin-B	FLNB	LTQVGGDHIKAHIANPSGASTECFVTDNADG	424	P	3	918		LTQVGGDHIK	A	H	I	A	N	P	S	G	A	S	T	ECFVTDNADG	0.98756	0.00563809	41.434	33.791	41.434	0.19199	34950000	0.98756	NaN	NaN	41.434	NaN	NaN
O75369	1989	O75369	O75369	Filamin-B	FLNB	HLVSIKKNGNHVANSPVSIMVVQSEIGDARR	427	P	3	918		HLVSIKKNGN	H	V	A	N	S	P	V	S	I	M	V	VQSEIGDARR	1	0.0270388	44.258	37.38	44.258	-1.7741	0	NaN	NaN	1	NaN	NaN	44.258
O75369	1163	O75369	O75369	Filamin-B	FLNB	VGEAGLLSVDCSEAGPGALGLEAVSDSGTKA	428	P	3	918		VGEAGLLSVD	C	S	E	A	G	P	G	A	L	G	L	EAVSDSGTKA	1	2.25e-05	71.608	66.343	71.608	-0.97212	17738000	1	NaN	NaN	71.608	NaN	NaN
O75369	912	O75369	O75369	Filamin-B	FLNB	DIIDNYDYSHTVKYTPTQQGNMQVLVTYGGD	430	P	2	918		DIIDNYDYSH	T	V	K	Y	T	P	T	Q	Q	G	N	MQVLVTYGGD	0.999998	0.000657427	87.66	76.046	87.66	0.36078	132200000	0.999998	NaN	0.999995	87.66	NaN	62.19
O75390	148	O75390	O75390	Citrate synthase, mitochondrial	CS	QVSWLSKEWAKRAALPSHVVTMLDNFPTNLH	433	P	4	926		QVSWLSKEWA	K	R	A	A	L	P	S	H	V	V	T	MLDNFPTNLH	0.994806	5.05e-07	68.101	60.606	68.101	0.76189	89303000	0.367091	NaN	0.994806	52.155	NaN	68.101
O75390	159	O75390	O75390	Citrate synthase, mitochondrial	CS	RAALPSHVVTMLDNFPTNLHPMSQLSAAVTA	434	P	4	926		RAALPSHVVT	M	L	D	N	F	P	T	N	L	H	P	MSQLSAAVTA	0.891594	2.05e-13	117.09	110.12	64.127	0.72022	5853100000	0.771835	0.891594	0.750604	116.94	117.09	73.371
O75396	104	O75396	O75396	Vesicle-trafficking protein SEC22b	SEC22B	EDLHSEFDEQHGKKVPTVSRPYSFIEFDTFI	437	P	2	929		EDLHSEFDEQ	H	G	K	K	V	P	T	V	S	R	P	YSFIEFDTFI	1	0.0205465	81.494	6.734	81.494	-0.98948	33576000	NaN	NaN	1	NaN	NaN	81.494
O75396	109	O75396	O75396	Vesicle-trafficking protein SEC22b	SEC22B	EFDEQHGKKVPTVSRPYSFIEFDTFIQKTKK	438	P	2	929		EFDEQHGKKV	P	T	V	S	R	P	Y	S	F	I	E	FDTFIQKTKK	1	0.0205465	81.494	6.734	81.494	-0.98948	33576000	NaN	NaN	1	NaN	NaN	81.494
O75414	146	O75414	O75414	Nucleoside diphosphate kinase 6	NME6	SDSVVSASREIAAFFPDFSEQRWYEEEEPQL	439	P	3	933		SDSVVSASRE	I	A	A	F	F	P	D	F	S	E	Q	RWYEEEEPQL	1	0.00550819	68.49	58.252	52.03	-1.0303	102790000	1	1	NaN	61.181	68.49	NaN
O75414	159	O75414	O75414	Nucleoside diphosphate kinase 6	NME6	FFPDFSEQRWYEEEEPQLRCGPVCYSPEGGV	440	P	3	933		FFPDFSEQRW	Y	E	E	E	E	P	Q	L	R	C	G	PVCYSPEGGV	1	0.00550819	68.49	58.252	52.03	-1.0303	102790000	1	1	NaN	61.181	68.49	NaN
O75431	150	O75431	O75431	Metaxin-2	MTX2	ATVGEITHARYGSPYPWPLNHILAYQKQWEV	442	P	3	938		ATVGEITHAR	Y	G	S	P	Y	P	W	P	L	N	H	ILAYQKQWEV	0.991988	0.00205299	61.265	56.286	61.265	1.2399	71649000	0.991988	NaN	NaN	61.265	NaN	NaN
O75431	152	O75431	O75431	Metaxin-2	MTX2	VGEITHARYGSPYPWPLNHILAYQKQWEVKR	443	P	3	938		VGEITHARYG	S	P	Y	P	W	P	L	N	H	I	L	AYQKQWEVKR	0.965036	0.00205299	61.265	56.286	61.265	1.2399	71649000	0.965036	NaN	NaN	61.265	NaN	NaN
O75436	221	O75436	O75436	Vacuolar protein sorting-associated protein 26A	VPS26A	HMELQLIKKEITGIGPSTTTETETIAKYEIM	444	P	3	939		HMELQLIKKE	I	T	G	I	G	P	S	T	T	T	E	TETIAKYEIM	0.85542	9.49e-05	78.588	69.207	78.588	1.8248	10325000	NaN	0.85542	NaN	NaN	78.588	NaN
O75448	432	O75448	O75448	Mediator of RNA polymerase II transcription subunit 24	MED24	VTNILKTMDADHSKSPEGLLGVLGHMLSGKS	446	P	5	944		VTNILKTMDA	D	H	S	K	S	P	E	G	L	L	G	VLGHMLSGKS	1	0.000405263	68.375	61.799	49.287	0.16956	147690000	1	1	1	59.356	58.974	68.375
O75460	857	O75460	O75460	Serine/threonine-protein kinase/endoribonuclease IRE1;Serine/threonine-protein kinase;Endoribonuclease	ERN1	FQDVSDRIEKESLDGPIVKQLERGGRAVVKM	448	P	4	946		FQDVSDRIEK	E	S	L	D	G	P	I	V	K	Q	L	ERGGRAVVKM	1	0.00656769	70.412	29.86	49.929	-0.97364	233080000	1	1	NaN	49.929	70.412	NaN
O75489	238	O75489	O75489	NADH dehydrogenase [ubiquinone] iron-sulfur protein 3, mitochondrial	NDUFS3	PVELAQEFRKFDLNSPWEAFPVYRQPPESLK	449	P	4	956		PVELAQEFRK	F	D	L	N	S	P	W	E	A	F	P	VYRQPPESLK	0.999975	0.00484976	58.272	48.417	58.272	-0.32545	241490000	0.999975	NaN	NaN	58.272	NaN	NaN
O75489	243	O75489	O75489	NADH dehydrogenase [ubiquinone] iron-sulfur protein 3, mitochondrial	NDUFS3	QEFRKFDLNSPWEAFPVYRQPPESLKLEAGD	450	P	4	956		QEFRKFDLNS	P	W	E	A	F	P	V	Y	R	Q	P	PESLKLEAGD	0.998963	0.00484976	58.272	48.417	58.272	-0.32545	241490000	0.998963	NaN	NaN	58.272	NaN	NaN
O75531	19	O75531	O75531	Barrier-to-autointegration factor;Barrier-to-autointegration factor, N-terminally processed	BANF1	SQKHRDFVAEPMGEKPVGSLAGIGEVLGKKL	453	P	4	966		SQKHRDFVAE	P	M	G	E	K	P	V	G	S	L	A	GIGEVLGKKL	0.911834	0.000231485	80.359	73.925	80.359	-0.17847	1213400000	NaN	0.911834	NaN	NaN	80.359	NaN
O75533	615	O75533	O75533	Splicing factor 3B subunit 1	SF3B1	LAKAAGLATMISTMRPDIDNMDEYVRNTTAR	454	P	3	967		LAKAAGLATM	I	S	T	M	R	P	D	I	D	N	M	DEYVRNTTAR	1	1.25e-19	160.48	143.54	42.172	-0.41067	507750000	1	1	1	80.303	160.48	80.303
O75533	780	O75533	O75533	Splicing factor 3B subunit 1	SF3B1	YTREVMLILIREFQSPDEEMKKIVLKVVKQC	455	P	3	967		YTREVMLILI	R	E	F	Q	S	P	D	E	E	M	K	KIVLKVVKQC	1	0.0013704	88.551	68.998	88.551	-3.5039	0	NaN	NaN	1	NaN	NaN	88.551
O75533	256	O75533	O75533	Splicing factor 3B subunit 1	SF3B1	GSETPGATPGSKIWDPTPSHTPAGAATPGRG	456	P	6	967		GSETPGATPG	S	K	I	W	D	P	T	P	S	H	T	PAGAATPGRG	0.962213	4.74e-07	78.228	72.908	78.228	-0.65815	163440000	0.962213	0.930065	NaN	78.228	53.288	NaN
O75533	258	O75533	O75533	Splicing factor 3B subunit 1	SF3B1	ETPGATPGSKIWDPTPSHTPAGAATPGRGDT	457	P	6	967		ETPGATPGSK	I	W	D	P	T	P	S	H	T	P	A	GAATPGRGDT	0.962213	4.74e-07	78.228	72.908	78.228	-0.65815	163440000	0.962213	0.92517	NaN	78.228	53.288	NaN
O75533	437	O75533	O75533	Splicing factor 3B subunit 1	SF3B1	VPIRTPARKLTATPTPLGGMTGFHMQTEDRT	458	P	2	967		VPIRTPARKL	T	A	T	P	T	P	L	G	G	M	T	GFHMQTEDRT	0.998832	7.72e-08	126.77	107.03	126.77	0.59003	451450000	0.998832	0.989335	0.99774	126.77	95.122	99.11
O75533	380	O75533	O75533	Splicing factor 3B subunit 1	SF3B1	MNMATPTPGHIMSMTPEQLQAWRWEREIDER	460	P	4	967		MNMATPTPGH	I	M	S	M	T	P	E	Q	L	Q	A	WRWEREIDER	0.750848	1.17e-05	60.641	60.641	60.641	0.5652	56648000	NaN	0.750848	0	NaN	60.641	NaN
O75534	672	O75534	O75534	Cold shock domain-containing protein E1	CSDE1	CVLGQNAQTMAYNITPLRRATVECVKDQFGF	461	P	3	968		CVLGQNAQTM	A	Y	N	I	T	P	L	R	R	A	T	VECVKDQFGF	1	0.000107321	90.22	81.544	72.568	-0.61493	288820000	NaN	1	NaN	NaN	90.22	NaN
O75534	610	O75534	O75534	Cold shock domain-containing protein E1	CSDE1	TIYSGKVIRPLRSVDPTQTEYQGMIEIVEEG	463	P	3	968		TIYSGKVIRP	L	R	S	V	D	P	T	Q	T	E	Y	QGMIEIVEEG	1	0.000201578	73.315	71.794	73.315	-1.085	42222000	1	NaN	1	63.184	NaN	73.315
O75592	837	O75592	O75592	E3 ubiquitin-protein ligase MYCBP2	MYCBP2	EARQRGILDAVKEMIPLDLLLAVPVPGVNIE	464	P	4	978		EARQRGILDA	V	K	E	M	I	P	L	D	L	L	L	AVPVPGVNIE	0.999971	5.13e-05	65.275	63.221	65.275	4.3847	27606000	NaN	0.999971	NaN	NaN	65.275	NaN
O75600	347	O75600	O75600	2-amino-3-ketobutyrate coenzyme A ligase, mitochondrial	GCAT	SKMEAAGFTISGASHPICPVMLGDARLASRM	465	P	3	979		SKMEAAGFTI	S	G	A	S	H	P	I	C	P	V	M	LGDARLASRM	0.641129	0.000159954	74.047	71.435	74.047	-0.27591	43367000	NaN	0.641129	NaN	NaN	74.047	NaN
O75643	504	O75643	O75643	U5 small nuclear ribonucleoprotein 200 kDa helicase	SNRNP200	YRAALETDENLLLCAPTGAGKTNVALMCMLR	469	P	2	985		YRAALETDEN	L	L	L	C	A	P	T	G	A	G	K	TNVALMCMLR	1	0.000137846	123.26	115.15	110.58	-2.4188	82143000	NaN	1	NaN	NaN	123.26	NaN
O75643	590	O75643	O75643	U5 small nuclear ribonucleoprotein 200 kDa helicase	SNRNP200	LCKEEISATQIIVCTPEKWDIITRKGGERTY	470	P	2	985		LCKEEISATQ	I	I	V	C	T	P	E	K	W	D	I	ITRKGGERTY	1	0.0115536	118.23	98.471	118.23	-0.29766	53653000	1	NaN	NaN	118.23	NaN	NaN
O75643	354	O75643	O75643	U5 small nuclear ribonucleoprotein 200 kDa helicase	SNRNP200	SEAEKERIMGKMEADPELSKFLYQLHETEKE	474	P	4	985		SEAEKERIMG	K	M	E	A	D	P	E	L	S	K	F	LYQLHETEKE	1	0.00354224	50.851	44.202	50.851	-0.26375	44677000	NaN	NaN	1	NaN	NaN	50.851
O75643	933	O75643	O75643	U5 small nuclear ribonucleoprotein 200 kDa helicase	SNRNP200	NWLGYAYLYIRMLRSPTLYGISHDDLKGDPL	475	P	4	985		NWLGYAYLYI	R	M	L	R	S	P	T	L	Y	G	I	SHDDLKGDPL	1	9.18e-12	131.56	124.61	131.56	0.61811	696180000	1	1	1	102.21	113.6	131.56
O75663	43	O75663	O75663	TIP41-like protein	TIPRL	MKSADVEKLADELHMPSLPEMMFGDNVLRIQ	476	P	4	987		MKSADVEKLA	D	E	L	H	M	P	S	L	P	E	M	MFGDNVLRIQ	0.545194	0.002561	54.141	54.141	49.888	-2.3249	48046000	NaN	0.533441	0.545194	NaN	54.141	49.888
O75691	457	O75691	O75691	Small subunit processome component 20 homolog	UTP20	ALAILAKLILNKAAPPTAGSMAIEKYPLVFS	478	P	3	994		ALAILAKLIL	N	K	A	A	P	P	T	A	G	S	M	AIEKYPLVFS	0.896314	0.0101884	54.152	48.311	54.152	-0.4622	95894000	NaN	0.896314	0	NaN	54.152	NaN
O75694	990	O75694	O75694	Nuclear pore complex protein Nup155	NUP155	ITDTLQELVNQSKAAPQSPSVPKKPGPPVLS	481	P	5	995		ITDTLQELVN	Q	S	K	A	A	P	Q	S	P	S	V	PKKPGPPVLS	0.806473	0.00116663	43.831	39.91	43.831	-2.5815	32419000	NaN	NaN	0.806473	NaN	NaN	43.831
O75694	993	O75694	O75694	Nuclear pore complex protein Nup155	NUP155	TLQELVNQSKAAPQSPSVPKKPGPPVLSSDP	482	P	5	995		TLQELVNQSK	A	A	P	Q	S	P	S	V	P	K	K	PGPPVLSSDP	0.806473	0.00116663	43.831	39.91	43.831	-2.5815	32419000	NaN	NaN	0.806473	NaN	NaN	43.831
O75694	996	O75694	O75694	Nuclear pore complex protein Nup155	NUP155	ELVNQSKAAPQSPSVPKKPGPPVLSSDPNML	483	P	5	995		ELVNQSKAAP	Q	S	P	S	V	P	K	K	P	G	P	PVLSSDPNML	0.806473	0.00116663	43.831	39.91	43.831	-2.5815	32419000	NaN	NaN	0.806473	NaN	NaN	43.831
O75694	999	O75694	O75694	Nuclear pore complex protein Nup155	NUP155	NQSKAAPQSPSVPKKPGPPVLSSDPNMLSNE	484	P	5	995		NQSKAAPQSP	S	V	P	K	K	P	G	P	P	V	L	SSDPNMLSNE	0.806473	0.00116663	43.831	39.91	43.831	-2.5815	32419000	NaN	NaN	0.806473	NaN	NaN	43.831
O75694	1001	O75694	O75694	Nuclear pore complex protein Nup155	NUP155	SKAAPQSPSVPKKPGPPVLSSDPNMLSNEEA	485	P	5	995		SKAAPQSPSV	P	K	K	P	G	P	P	V	L	S	S	DPNMLSNEEA	0.806473	0.00116663	43.831	39.91	43.831	-2.5815	32419000	NaN	NaN	0.806473	NaN	NaN	43.831
O75694	1002	O75694	O75694	Nuclear pore complex protein Nup155	NUP155	KAAPQSPSVPKKPGPPVLSSDPNMLSNEEAG	486	P	5	995		KAAPQSPSVP	K	K	P	G	P	P	V	L	S	S	D	PNMLSNEEAG	0.806473	0.00116663	43.831	39.91	43.831	-2.5815	32419000	NaN	NaN	0.806473	NaN	NaN	43.831
O75694	497	O75694	O75694	Nuclear pore complex protein Nup155	NUP155	PITDSPVVVQQHMLPPKKFVLLSAQGSLMFH	488	P	5	995		PITDSPVVVQ	Q	H	M	L	P	P	K	K	F	V	L	LSAQGSLMFH	0.534528	7.39e-05	80.07	76.783	78.837	0.17007	49548000	0.534528	NaN	NaN	80.07	NaN	NaN
O75694	90	O75694	O75694	Nuclear pore complex protein Nup155	NUP155	VPNLPEISSIRRVPLPPELVEQFGHMQCNCM	489	P	3	995		VPNLPEISSI	R	R	V	P	L	P	P	E	L	V	E	QFGHMQCNCM	0.993174	0.00136342	47.018	47.018	47.018	-0.9841	16403000	NaN	0.993174	NaN	NaN	47.018	NaN
O75694	91	O75694	O75694	Nuclear pore complex protein Nup155	NUP155	PNLPEISSIRRVPLPPELVEQFGHMQCNCMM	490	P	3	995		PNLPEISSIR	R	V	P	L	P	P	E	L	V	E	Q	FGHMQCNCMM	0.996405	0.00136342	47.018	47.018	47.018	-0.9841	16403000	NaN	0.996405	NaN	NaN	47.018	NaN
O75717	370	O75717	O75717	WD repeat and HMG-box DNA-binding protein 1	WDHD1	NDDEDDEDLMMASGRPRQRSHILEDDENSVD	494	P	3	998		NDDEDDEDLM	M	A	S	G	R	P	R	Q	R	S	H	ILEDDENSVD	1	0.00720446	58.997	56.031	58.997	-0.34471	115420000	NaN	NaN	1	NaN	NaN	58.997
O75718	176	O75718	O75718	Cartilage-associated protein	CRTAP	LPKAIAAAHTFLLKHPDDEMMKRNMAYYKSL	496	P	4	999		LPKAIAAAHT	F	L	L	K	H	P	D	D	E	M	M	KRNMAYYKSL	1	1.54e-06	119.38	116.4	51.348	-0.31358	1639600000	1	1	1	69.188	119.38	65.951
O75746	36	O75746	O75746	Calcium-binding mitochondrial carrier protein Aralar1	SLC25A12	LQYASTEVDGERYMTPEDFVQRYLGLYNDPN	497	P	3	1000		LQYASTEVDG	E	R	Y	M	T	P	E	D	F	V	Q	RYLGLYNDPN	1	3.96e-05	110.72	94.378	99.686	0.52455	110160000	1	NaN	NaN	110.72	NaN	NaN
O75781	115	O75781	O75781	Paralemmin-1	PALM	RGDSAPATAKENAAAPSPVRAPAPSPAKEER	498	P	3	1002		RGDSAPATAK	E	N	A	A	A	P	S	P	V	R	A	PAPSPAKEER	1	0.00657378	47.75	38.654	47.75	-2.2361	16089000	1	NaN	NaN	47.75	NaN	NaN
O75781	117	O75781	O75781	Paralemmin-1	PALM	DSAPATAKENAAAPSPVRAPAPSPAKEERKT	499	P	3	1002		DSAPATAKEN	A	A	A	P	S	P	V	R	A	P	A	PSPAKEERKT	1	0.00657378	47.75	38.654	47.75	-2.2361	16089000	1	NaN	NaN	47.75	NaN	NaN
O75781	121	O75781	O75781	Paralemmin-1	PALM	ATAKENAAAPSPVRAPAPSPAKEERKTEVVM	500	P	3	1002		ATAKENAAAP	S	P	V	R	A	P	A	P	S	P	A	KEERKTEVVM	1	0.00657378	47.75	38.654	47.75	-2.2361	16089000	1	NaN	NaN	47.75	NaN	NaN
O75781	123	O75781	O75781	Paralemmin-1	PALM	AKENAAAPSPVRAPAPSPAKEERKTEVVMNS	501	P	3	1002		AKENAAAPSP	V	R	A	P	A	P	S	P	A	K	E	ERKTEVVMNS	1	0.00657378	47.75	38.654	47.75	-2.2361	16089000	1	NaN	NaN	47.75	NaN	NaN
O75781	125	O75781	O75781	Paralemmin-1	PALM	ENAAAPSPVRAPAPSPAKEERKTEVVMNSQQ	502	P	3	1002		ENAAAPSPVR	A	P	A	P	S	P	A	K	E	E	R	KTEVVMNSQQ	1	0.00657378	47.75	38.654	47.75	-2.2361	16089000	1	NaN	NaN	47.75	NaN	NaN
O75820	4	O75820	O75820	Zinc finger protein 189	ZNF189	____________MASPSPPPESKGLLTFEDV	503	P	2	1009		__________	_	_	M	A	S	P	S	P	P	P	E	SKGLLTFEDV	0.711381	0.0124396	59.597	17.309	54.722	0.43625	83547000	0.711381	0.5	0.533034	54.722	59.597	58.433
O75821	2	O75821	O75821	Eukaryotic translation initiation factor 3 subunit G	EIF3G	______________MPTGDFDSKPSWADQVE	507	P	4	1010		__________	_	_	_	_	M	P	T	G	D	F	D	SKPSWADQVE	1	3.42e-05	81.967	77.11	68.733	0.27767	713920000	1	1	NaN	81.967	52.268	NaN
O75821	10	O75821	O75821	Eukaryotic translation initiation factor 3 subunit G	EIF3G	______MPTGDFDSKPSWADQVEEEGEDDKC	508	P	4	1010		______MPTG	D	F	D	S	K	P	S	W	A	D	Q	VEEEGEDDKC	1	2.79e-05	92.238	90.483	68.733	0.27767	721430000	1	1	NaN	81.967	92.238	NaN
O75822	150	O75822	O75822	Eukaryotic translation initiation factor 3 subunit J	EIF3J	TFGVNNAVYGIDAMNPSSRDDFTEFGKLLKD	509	P	4	1011		TFGVNNAVYG	I	D	A	M	N	P	S	S	R	D	D	FTEFGKLLKD	1	6.28e-08	103.94	96.681	103.94	-1.6233	89501000	1	NaN	NaN	103.94	NaN	NaN
O75832	109	O75832	O75832	26S proteasome non-ATPase regulatory subunit 10	PSMD10	GKGAQVNAVNQNGCTPLHYAASKNRHEIAVM	510	P	3	1013		GKGAQVNAVN	Q	N	G	C	T	P	L	H	Y	A	A	SKNRHEIAVM	1	0.00529943	57.009	39.414	49.768	-0.59114	309300000	1	1	NaN	50.425	57.009	NaN
O75832	132	O75832	O75832	26S proteasome non-ATPase regulatory subunit 10	PSMD10	NRHEIAVMLLEGGANPDAKDHYEATAMHRAA	511	P	6	1013		NRHEIAVMLL	E	G	G	A	N	P	D	A	K	D	H	YEATAMHRAA	1	4.78e-05	79.762	75.657	43.31	0.23741	223090000	1	1	1	43.31	77.925	79.762
O75844	302	O75844	O75844	CAAX prenyl protease 1 homolog	ZMPSTE24	YSVLNKDIQEDSGMEPRNEEEGNSEEIKAKV	512	P	3	1016		YSVLNKDIQE	D	S	G	M	E	P	R	N	E	E	E	GNSEEIKAKV	1	2.12e-19	157.28	143.87	122.27	-0.085382	505620000	1	NaN	1	122.27	NaN	157.28
O75844	460	O75844	O75844	CAAX prenyl protease 1 homolog	ZMPSTE24	FPVSDWLFSMWHYSHPPLLERLQALKTMKQH	513	P	5	1016		FPVSDWLFSM	W	H	Y	S	H	P	P	L	L	E	R	LQALKTMKQH	0.999993	9.11e-05	63.803	54.716	63.803	-0.51911	70889000	NaN	0.999993	NaN	NaN	63.803	NaN
O75844	461	O75844	O75844	CAAX prenyl protease 1 homolog	ZMPSTE24	PVSDWLFSMWHYSHPPLLERLQALKTMKQH_	514	P	5	1016		PVSDWLFSMW	H	Y	S	H	P	P	L	L	E	R	L	QALKTMKQH_	0.999983	9.11e-05	63.803	54.716	63.803	-0.51911	70889000	NaN	0.999983	NaN	NaN	63.803	NaN
O75886	124	O75886	O75886	Signal transducing adapter molecule 2	STAM2	LKSLMVEWSEEFQKDPQFSLISATIKSMKEE	517	P	3	1026		LKSLMVEWSE	E	F	Q	K	D	P	Q	F	S	L	I	SATIKSMKEE	1	0.0320448	43.523	31.443	43.523	-3.4218	16797000	1	NaN	NaN	43.523	NaN	NaN
O75914;Q13153;Q13177	446;433;412	O75914;Q13153;Q13177	Q13177	Serine/threonine-protein kinase PAK 3;Serine/threonine-protein kinase PAK 1;Serine/threonine-protein kinase PAK 2;PAK-2p27;PAK-2p34	PAK3;PAK1;PAK2	QSKRSTMVGTPYWMAPEVVTRKAYGPKVDIW	520	P	3	1033;3523;3529		QSKRSTMVGT	P	Y	W	M	A	P	E	V	V	T	R	KAYGPKVDIW	1	0.000193899	89.629	68.966	47.752	0.0068296	316230000	1	1	1	77.185	89.629	62.891
O75915	7	O75915	O75915	PRA1 family protein 3	ARL6IP5	_________MDVNIAPLRAWDDFFPGSDRFA	521	P	3	1034		_________M	D	V	N	I	A	P	L	R	A	W	D	DFFPGSDRFA	1	0.000939798	58.49	50.651	46.027	-0.034102	15402000	NaN	NaN	1	NaN	NaN	58.49
O75915	16	O75915	O75915	PRA1 family protein 3	ARL6IP5	MDVNIAPLRAWDDFFPGSDRFARPDFRDISK	522	P	3	1034		MDVNIAPLRA	W	D	D	F	F	P	G	S	D	R	F	ARPDFRDISK	1	0.000939798	58.49	50.651	46.027	-0.034102	15402000	NaN	NaN	1	NaN	NaN	58.49
O75934	56	O75934	O75934	Pre-mRNA-splicing factor SPF27	BCAS2	RRYRPTKNYLSYLTAPDYSAFETDIMRNEFE	524	P	3	1038		RRYRPTKNYL	S	Y	L	T	A	P	D	Y	S	A	F	ETDIMRNEFE	1	0.00509579	67.239	60.643	67.239	-0.64281	180520000	NaN	1	NaN	NaN	67.239	NaN
O75947	151	O75947	O75947	ATP synthase subunit d, mitochondrial	ATP5H	LNEAFPETKLDKKKYPYWPHQPIENL_____	526	P	2	1043		LNEAFPETKL	D	K	K	K	Y	P	Y	W	P	H	Q	PIENL_____	1	0.000564394	158.02	127.14	158.02	0.53061	242720000	NaN	1	NaN	NaN	158.02	NaN
O75947	154	O75947	O75947	ATP synthase subunit d, mitochondrial	ATP5H	AFPETKLDKKKYPYWPHQPIENL________	527	P	2	1043		AFPETKLDKK	K	Y	P	Y	W	P	H	Q	P	I	E	NL________	1	0.000564394	158.02	127.14	158.02	0.53061	242720000	NaN	1	NaN	NaN	158.02	NaN
O75947	49	O75947	O75947	ATP synthase subunit d, mitochondrial	ATP5H	WNETLTSRLAALPENPPAIDWAYYKANVAKA	528	P	2	1043		WNETLTSRLA	A	L	P	E	N	P	P	A	I	D	W	AYYKANVAKA	0.999983	0.0154068	93.345	85.434	93.345	0.1765	467690000	0.999983	0.999863	0.999887	93.345	83.182	85.813
O75947	50	O75947	O75947	ATP synthase subunit d, mitochondrial	ATP5H	NETLTSRLAALPENPPAIDWAYYKANVAKAG	529	P	2	1043		NETLTSRLAA	L	P	E	N	P	P	A	I	D	W	A	YYKANVAKAG	0.999983	0.0154068	93.345	85.434	93.345	0.1765	467690000	0.999983	0.999863	0.999887	93.345	83.182	85.813
O75947	127	O75947	O75947	ATP synthase subunit d, mitochondrial	ATP5H	IVEYEKEMEKMKNLIPFDQMTIEDLNEAFPE	530	P	2	1043		IVEYEKEMEK	M	K	N	L	I	P	F	D	Q	M	T	IEDLNEAFPE	1	3e-18	165.64	149.7	165.64	-1.2785	3711500000	0.999999	1	1	68.49	165.64	150.12
O75947	21	O75947	O75947	ATP synthase subunit d, mitochondrial	ATP5H	LALKTIDWVAFAEIIPQNQKAIASSLKSWNE	531	P	3	1043		LALKTIDWVA	F	A	E	I	I	P	Q	N	Q	K	A	IASSLKSWNE	1	0.00510735	68.972	54.718	68.972	-0.010297	12560000	NaN	1	1	NaN	63.727	68.972
O75970	747	O75970	O75970	Multiple PDZ domain protein	MPDZ	SLVPGGIAEKDGRLLPGDRLMFVNDVNLENS	532	P	3	1050		SLVPGGIAEK	D	G	R	L	L	P	G	D	R	L	M	FVNDVNLENS	1	4.98e-10	123.16	114.18	66.925	0.73245	721350000	1	1	1	123.16	79.636	116.73
O76003	230	O76003	O76003	Glutaredoxin-3	GLRX3	IIKELEASEELDTICPKAPKLEERLKVLTNK	534	P	2	1054		IIKELEASEE	L	D	T	I	C	P	K	A	P	K	L	EERLKVLTNK	1	8.9e-19	199.68	183.54	199.68	0.60308	336950000	1	NaN	NaN	199.68	NaN	NaN
O76031	248	O76031	O76031	ATP-dependent Clp protease ATP-binding subunit clpX-like, mitochondrial	CLPX	DEYRFTKLLQIAGISPHGNALGASMQQQVNQ	539	P	3	1057		DEYRFTKLLQ	I	A	G	I	S	P	H	G	N	A	L	GASMQQQVNQ	0.999963	0.000306305	58.945	54.277	58.945	1.357	199840000	0.999963	NaN	0.99979	58.945	NaN	51.621
O76080	115	O76080	O76080	AN1-type zinc finger protein 5	ZFAND5	QMTEMSISREDKITTPKTEVSEPVVTQPSPS	541	P	4	1068		QMTEMSISRE	D	K	I	T	T	P	K	T	E	V	S	EPVVTQPSPS	0.999244	0.00786079	47.237	37.904	47.237	1.2886	63373000	NaN	NaN	0.999244	NaN	NaN	47.237
O76094	507	O76094	O76094	Signal recognition particle subunit SRP72	SRP72	SLVDPEKAKALSKHLPSSDSMSLKVDVEALE	542	P	3	1070		SLVDPEKAKA	L	S	K	H	L	P	S	S	D	S	M	SLKVDVEALE	1	2.91e-05	110.31	104.15	100.7	-0.54976	802580000	1	1	1	107.17	107.83	110.31
O76094	563	O76094	O76094	Signal recognition particle subunit SRP72	SRP72	QGDLKKKKKKKKGKLPKNYDPKVTPDPERWL	543	P	2	1070		QGDLKKKKKK	K	K	G	K	L	P	K	N	Y	D	P	KVTPDPERWL	1	0.00785834	115	64.054	115	-0.36083	60617000	NaN	1	NaN	NaN	115	NaN
O76094	568	O76094	O76094	Signal recognition particle subunit SRP72	SRP72	KKKKKKKGKLPKNYDPKVTPDPERWLPMRER	544	P	2	1070		KKKKKKKGKL	P	K	N	Y	D	P	K	V	T	P	D	PERWLPMRER	1	0.00785834	115	64.054	115	-0.36083	60617000	NaN	1	NaN	NaN	115	NaN
O94760	183	O94760	O94760	N(G),N(G)-dimethylarginine dimethylaminohydrolase 1	DDAH1	VADGLHLKSFCSMAGPNLIAIGSSESAQKAL	546	P	3	1073		VADGLHLKSF	C	S	M	A	G	P	N	L	I	A	I	GSSESAQKAL	1	0.000174497	76.176	75.157	76.176	-2.3381	39792000	1	1	1	52.509	75.358	76.176
O94788	9	O94788	O94788	Retinal dehydrogenase 2	ALDH1A2	_______MTSSKIEMPGEVKADPAALMASLH	548	P	4	1082		_______MTS	S	K	I	E	M	P	G	E	V	K	A	DPAALMASLH	0.547184	2.2e-07	93.043	93.043	46.464	-1.2741	848440000	0.547184	0.531893	0.544453	56.984	93.043	63.033
O94788	16	O94788	O94788	Retinal dehydrogenase 2	ALDH1A2	MTSSKIEMPGEVKADPAALMASLHLLPSPTP	549	P	5	1082		MTSSKIEMPG	E	V	K	A	D	P	A	A	L	M	A	SLHLLPSPTP	0.808807	8.75e-07	93.043	93.043	89.577	0.62561	339110000	0.808807	0.499444	0.706572	89.577	93.043	69.482
O94788	27	O94788	O94788	Retinal dehydrogenase 2	ALDH1A2	VKADPAALMASLHLLPSPTPNLEIKYTKIFI	550	P	5	1082		VKADPAALMA	S	L	H	L	L	P	S	P	T	P	N	LEIKYTKIFI	0.67365	8.8e-07	71.068	71.068	56.383	0.049368	383580000	0	0.67365	NaN	NaN	71.068	NaN
O94804	948	O94804	O94804	Serine/threonine-protein kinase 10	STK10	REQEMFFKLSEEAECPNPSTPSKAAKFFPYS	551	P	2	1083		REQEMFFKLS	E	E	A	E	C	P	N	P	S	T	P	SKAAKFFPYS	0.981934	0.00882363	111.86	104.13	111.86	0.82437	26826000	0.981934	NaN	NaN	111.86	NaN	NaN
O94826	383	O94826	O94826	Mitochondrial import receptor subunit TOM70	TOMM70A	NALIKRGSMYMQQQQPLLSTQDFNMAADIDP	555	P	5	1092		NALIKRGSMY	M	Q	Q	Q	Q	P	L	L	S	T	Q	DFNMAADIDP	0.999796	7.8e-08	83.198	83.198	50.942	-0.6101	98637000	0.997235	0.999796	NaN	83.198	50.942	NaN
O94906	639	O94906	O94906	Pre-mRNA-processing factor 6	PRPF6	VPAARSILALAFQANPNSEEIWLAAVKLESE	563	P	3	1117		VPAARSILAL	A	F	Q	A	N	P	N	S	E	E	I	WLAAVKLESE	1	3.18e-07	100.1	95.779	100.1	-2.11	16309000	1	1	1	87.749	84.641	100.1
O94923	439	O94923	O94923	D-glucuronyl C5-epimerase	GLCE	IMVTRKLGEGFKSLEPGWYSAMAQGQAISTL	564	P	3	1123		IMVTRKLGEG	F	K	S	L	E	P	G	W	Y	S	A	MAQGQAISTL	1	0.0254375	47.392	37.918	47.392	1.146	18575000	NaN	1	NaN	NaN	47.392	NaN
O94925	329	O94925	O94925	Glutaminase kidney isoform, mitochondrial	GLS	SGLRFNKLFLNEDDKPHNPMVNAGAIVVTSL	565	P	5	1124		SGLRFNKLFL	N	E	D	D	K	P	H	N	P	M	V	NAGAIVVTSL	0.555788	8.57e-05	85.489	80.223	85.489	-0.5742	580390000	NaN	0.52696	0.555788	NaN	42.59	85.489
O94925	450	O94925	O94925	Glutaminase kidney isoform, mitochondrial	GLS	ANGGFCPITGERVLSPEAVRNTLSLMHSCGM	567	P	5	1124		ANGGFCPITG	E	R	V	L	S	P	E	A	V	R	N	TLSLMHSCGM	1	6.47e-06	87.719	82.404	87.719	-0.34129	254920000	NaN	1	NaN	NaN	87.719	NaN
O94952	543	O94952	O94952	F-box only protein 21	FBXO21	MMGHEWIRNMNVHSLPHGHHQPFYNVLVEDG	568	P	5	1127		MMGHEWIRNM	N	V	H	S	L	P	H	G	H	H	Q	PFYNVLVEDG	0.930697	0.00202714	54.521	48.618	54.521	-1.1217	93139000	0.870044	NaN	0.930697	46.404	NaN	54.521
O94979	824	O94979	O94979	Protein transport protein Sec31A	SEC31A	LPKGRPGPVAGHHQMPRVQTQQYYPHGENPP	570	P	4	1135		LPKGRPGPVA	G	H	H	Q	M	P	R	V	Q	T	Q	QYYPHGENPP	0.999988	0.0114691	61.423	49.446	61.423	-2.4728	193810000	0.999951	0.999988	0.999938	56.569	61.423	52.265
O94986	1491	O94986	O94986	Centrosomal protein of 152 kDa	CEP152	HKKKDLLSDNGSESLPHSAAYPFLGTLGNKP	571	P	5	1138		HKKKDLLSDN	G	S	E	S	L	P	H	S	A	A	Y	PFLGTLGNKP	0.978806	0.00492814	48.685	30.891	48.685	2.6206	25189000	NaN	0.978806	NaN	NaN	48.685	NaN
O95071	2650	O95071	O95071	E3 ubiquitin-protein ligase UBR5	UBR5	VRKYAEHRMLVVAEQPLHAMRKGLLDVLPKN	573	P	3	1147		VRKYAEHRML	V	V	A	E	Q	P	L	H	A	M	R	KGLLDVLPKN	1	0.00907628	51.211	43.235	51.211	1.3655	0	NaN	1	NaN	NaN	51.211	NaN
O95104	143	O95104	O95104	Splicing factor, arginine/serine-rich 15	SCAF4	IQPLLDMAAGTSNAAPVAENVTNNEGSPPPP	575	P	4	1150		IQPLLDMAAG	T	S	N	A	A	P	V	A	E	N	V	TNNEGSPPPP	0.998988	0.000154459	40.347	39.054	40.347	-1.4831	125340000	NaN	NaN	0.998988	NaN	NaN	40.347
O95104	155	O95104	O95104	Splicing factor, arginine/serine-rich 15	SCAF4	NAAPVAENVTNNEGSPPPPVKVSSEPPTQAT	576	P	4	1150		NAAPVAENVT	N	N	E	G	S	P	P	P	P	V	K	VSSEPPTQAT	0.99902	0.000154459	40.347	39.054	40.347	-1.4831	125340000	NaN	NaN	0.99902	NaN	NaN	40.347
O95104	156	O95104	O95104	Splicing factor, arginine/serine-rich 15	SCAF4	AAPVAENVTNNEGSPPPPVKVSSEPPTQATP	577	P	4	1150		AAPVAENVTN	N	E	G	S	P	P	P	P	V	K	V	SSEPPTQATP	0.99902	0.000154459	40.347	39.054	40.347	-1.4831	125340000	NaN	NaN	0.99902	NaN	NaN	40.347
O95104	157	O95104	O95104	Splicing factor, arginine/serine-rich 15	SCAF4	APVAENVTNNEGSPPPPVKVSSEPPTQATPN	578	P	4	1150		APVAENVTNN	E	G	S	P	P	P	P	V	K	V	S	SEPPTQATPN	0.99902	0.000154459	40.347	39.054	40.347	-1.4831	125340000	NaN	NaN	0.99902	NaN	NaN	40.347
O95104	158	O95104	O95104	Splicing factor, arginine/serine-rich 15	SCAF4	PVAENVTNNEGSPPPPVKVSSEPPTQATPNS	579	P	4	1150		PVAENVTNNE	G	S	P	P	P	P	V	K	V	S	S	EPPTQATPNS	0.998791	0.000154459	40.347	39.054	40.347	-1.4831	125340000	NaN	NaN	0.998791	NaN	NaN	40.347
O95139	124	O95139	O95139	NADH dehydrogenase [ubiquinone] 1 beta subcomplex subunit 6	NDUFB6	TILETGEVIPPMKEFPDQHH___________	582	P	4	1153		TILETGEVIP	P	M	K	E	F	P	D	Q	H	H	_	__________	0.778126	6.7e-05	81.341	72.607	81.341	-1.9635	49929000	NaN	0.778126	0.453283	NaN	81.341	71.091
O95147	77	O95147	O95147	Dual specificity protein phosphatase 14	DUSP14	EIPNFNWPQFEYVKVPLADMPHAPIGLYFDT	583	P	5	1155		EIPNFNWPQF	E	Y	V	K	V	P	L	A	D	M	P	HAPIGLYFDT	0.513148	0.000291012	63.901	57.806	63.901	0.029166	147440000	NaN	0.513148	0.438216	NaN	63.901	50.986
O95163	712	O95163	O95163	Elongator complex protein 1	IKBKAP	IVTVVPQDTKLVLQMPRGNLEVVHHRALVLA	585	P	3	1160		IVTVVPQDTK	L	V	L	Q	M	P	R	G	N	L	E	VVHHRALVLA	1	9.73e-06	145.55	129.36	140.22	0.023432	860890000	0.999999	1	1	125.5	145.55	124.25
O95163	1004	O95163	O95163	Elongator complex protein 1	IKBKAP	SIAYGEHLMQEHMYEPAGLMFARCGAHEKAL	586	P	4	1160		SIAYGEHLMQ	E	H	M	Y	E	P	A	G	L	M	F	ARCGAHEKAL	0.999948	7.95e-07	76.956	76.956	76.956	0.36741	527520000	0.999792	0.999638	0.999948	53.482	57.076	76.956
O95167	56	O95167	O95167	NADH dehydrogenase [ubiquinone] 1 alpha subcomplex subunit 3	NDUFA3	YSVMINKATPYNYPVPVRDDGNMPDVPSHPQ	590	P	4	1163		YSVMINKATP	Y	N	Y	P	V	P	V	R	D	D	G	NMPDVPSHPQ	0.909342	8.96e-08	89.391	81.586	73.657	-2.2699	1351400000	0.909342	0.74852	0.720839	73.657	89.391	57.025
O95167	64	O95167	O95167	NADH dehydrogenase [ubiquinone] 1 alpha subcomplex subunit 3	NDUFA3	TPYNYPVPVRDDGNMPDVPSHPQDPQGPSLE	591	P	4	1163		TPYNYPVPVR	D	D	G	N	M	P	D	V	P	S	H	PQDPQGPSLE	0.55007	0.00344998	46.31	42.035	40.638	-2.9424	54379000	0.55007	NaN	NaN	46.31	NaN	NaN
O95167	73	O95167	O95167	NADH dehydrogenase [ubiquinone] 1 alpha subcomplex subunit 3	NDUFA3	RDDGNMPDVPSHPQDPQGPSLEWLKKL____	592	P	4	1163		RDDGNMPDVP	S	H	P	Q	D	P	Q	G	P	S	L	EWLKKL____	0.84168	0.00158419	48.388	44.113	46.31	-0.78195	282420000	0.84168	NaN	NaN	48.388	NaN	NaN
O95167	76	O95167	O95167	NADH dehydrogenase [ubiquinone] 1 alpha subcomplex subunit 3	NDUFA3	GNMPDVPSHPQDPQGPSLEWLKKL_______	593	P	4	1163		GNMPDVPSHP	Q	D	P	Q	G	P	S	L	E	W	L	KKL_______	0.84168	0.00158419	48.388	44.113	46.31	-0.78195	282420000	0.84168	NaN	NaN	48.388	NaN	NaN
O95169	66	O95169	O95169	NADH dehydrogenase [ubiquinone] 1 beta subcomplex subunit 8, mitochondrial	NDUFB8	AAKKYNMRVEDYEPYPDDGMGYGDYPKLPDR	594	P	3	1165		AAKKYNMRVE	D	Y	E	P	Y	P	D	D	G	M	G	YGDYPKLPDR	0.972406	0.00138351	62.684	62.684	55.705	0.90679	69351000	0.971747	NaN	0.972406	62.684	NaN	55.705
O95201	31	O95201	O95201	Zinc finger protein 205	ZNF205	TPPEVPDRGHPHQEMPSKLGEAVPSGDTQES	598	P	5	1172		TPPEVPDRGH	P	H	Q	E	M	P	S	K	L	G	E	AVPSGDTQES	0.688546	9e-06	61.526	56.207	61.526	-0.3506	28863000	NaN	0.688546	NaN	NaN	61.526	NaN
O95202	637	O95202	O95202	LETM1 and EF-hand domain-containing protein 1, mitochondrial	LETM1	LISQLEMDQQAGKLAPANGMPTGENVISVAE	599	P	2	1173		LISQLEMDQQ	A	G	K	L	A	P	A	N	G	M	P	TGENVISVAE	0.999302	3.48e-06	116.43	116.43	116.43	-0.37352	275150000	0.999302	NaN	NaN	116.43	NaN	NaN
O95232	20	O95232	O95232	Luc7-like protein 3	LUC7L3	AQLLDELMGRDRNLAPDEKRSNVRWDHESVC	600	P	3	1179		AQLLDELMGR	D	R	N	L	A	P	D	E	K	R	S	NVRWDHESVC	1	6.2e-05	69.122	56.568	48.656	0.34399	92639000	1	NaN	1	69.122	NaN	58.914
O95235	57	O95235	O95235	Kinesin-like protein KIF20A	KIF20A	DCSVVSTSLEDKQQVPSEDSMEKVKVYLRVR	603	P	4	1180		DCSVVSTSLE	D	K	Q	Q	V	P	S	E	D	S	M	EKVKVYLRVR	1	0.009554	44.05	38.784	42.659	0.94094	103250000	1	NaN	1	42.659	NaN	44.05
O95249	98	O95249	O95249	Golgi SNAP receptor complex member 1	GOSR1	GVNDKMAEYTNSAGVPSLNAALMHTLQRHRD	607	P	3	1184		GVNDKMAEYT	N	S	A	G	V	P	S	L	N	A	A	LMHTLQRHRD	1	0.0165167	44.632	37.186	44.632	-1.627	43742000	NaN	1	NaN	NaN	44.632	NaN
O95340	540	O95340	O95340	Bifunctional 3'-phosphoadenosine 5'-phosphosulfate synthase 2;Sulfate adenylyltransferase;Adenylyl-sulfate kinase	PAPSS2	DLYEPTHGGKVLSMAPGLTSVEIIPFRVAAY	611	P	3	1200		DLYEPTHGGK	V	L	S	M	A	P	G	L	T	S	V	EIIPFRVAAY	1	0.000586267	89.506	54.686	89.506	0.14086	218710000	NaN	NaN	1	NaN	NaN	89.506
O95347	1050	O95347	O95347	Structural maintenance of chromosomes protein 2	SMC2	QKVNKDFGSIFSTLLPGANAMLAPPEGQTVL	612	P	3	1202		QKVNKDFGSI	F	S	T	L	L	P	G	A	N	A	M	LAPPEGQTVL	0.940595	2.58e-05	61.669	57.047	61.669	0.91249	415560000	0.940595	NaN	NaN	61.669	NaN	NaN
O95352	17	O95352	O95352	Ubiquitin-like modifier-activating enzyme ATG7	ATG7	AAATGDPGLSKLQFAPFSSALDVGFWHELTQ	613	P	3	1203		AAATGDPGLS	K	L	Q	F	A	P	F	S	S	A	L	DVGFWHELTQ	0.995814	0.000434879	52.669	37.389	52.669	-3.6974	0	NaN	0.995814	NaN	NaN	52.669	NaN
O95372	180	O95372	O95372	Acyl-protein thioesterase 2	LYPLA2	DLAILQCHGELDPMVPVRFGALTAEKLRSVV	616	P	4	1207		DLAILQCHGE	L	D	P	M	V	P	V	R	F	G	A	LTAEKLRSVV	0.550057	0.000422327	56.46	45.753	56.46	1.2156	66683000	0.550057	NaN	0.531505	56.46	NaN	51.844
O95372	73	O95372	O95372	Acyl-protein thioesterase 2	LYPLA2	HAPRIPVTLNMKMVMPSWFDLMGLSPDAPED	617	P	3	1207		HAPRIPVTLN	M	K	M	V	M	P	S	W	F	D	L	MGLSPDAPED	0.993975	0.000149992	77.649	77.649	59.356	1.107	190410000	0.993975	0.851905	0.990552	59.356	48.389	77.649
O95373	974	O95373	O95373	Importin-7	IPO7	YQIFKAIFQTIQNRNPVWYQALTHGLNEEQR	620	P	3	1208		YQIFKAIFQT	I	Q	N	R	N	P	V	W	Y	Q	A	LTHGLNEEQR	1	0.0151485	69.071	63.104	69.071	-3.7516	0	1	NaN	NaN	69.071	NaN	NaN
O95373	537	O95373	O95373	Importin-7	IPO7	QVLISNQEKAKEYITPFIRPVMQALLHIIRE	621	P	5	1208		QVLISNQEKA	K	E	Y	I	T	P	F	I	R	P	V	MQALLHIIRE	0.55427	5.52e-07	67.459	63.719	46.783	1.3126	212830000	0.5	0.539956	0.55427	53.968	53.615	67.459
O95373	463	O95373	O95373	Importin-7	IPO7	IYKDQMEYMLQNHVFPLFSSELGYMRARACW	623	P	4	1208		IYKDQMEYML	Q	N	H	V	F	P	L	F	S	S	E	LGYMRARACW	1	0.00012431	77.641	72.973	41.939	0.29353	1218300000	1	1	1	77.641	46.307	71.052
O95373	3	O95373	O95373	Importin-7	IPO7	_____________MDPNTIIEALRGTMDPAL	624	P	3	1208		__________	_	_	_	M	D	P	N	T	I	I	E	ALRGTMDPAL	0.998472	0.000271723	58.457	58.457	58.457	-0.16708	458750000	NaN	0.998472	NaN	NaN	58.457	NaN
O95373	69	O95373	O95373	Importin-7	IPO7	QAGVIYLKNMITQYWPDRETAPGDISPYTIP	625	P	5	1208		QAGVIYLKNM	I	T	Q	Y	W	P	D	R	E	T	A	PGDISPYTIP	0.991387	0.021784	47.537	45.782	41.133	-0.6876	52702000	0.91992	0.991387	NaN	47.537	41.133	NaN
O95373	75	O95373	O95373	Importin-7	IPO7	LKNMITQYWPDRETAPGDISPYTIPEEDRHC	626	P	5	1208		LKNMITQYWP	D	R	E	T	A	P	G	D	I	S	P	YTIPEEDRHC	0.991387	0.021784	47.537	45.782	41.133	-0.6876	52702000	0.977423	0.991387	NaN	47.537	41.133	NaN
O95394	160	O95394	O95394	Phosphoacetylglucosamine mutase	PGM3	TVLGGQFHDYGLLTTPQLHYMVYCRNTGGRY	629	P	4	1213		TVLGGQFHDY	G	L	L	T	T	P	Q	L	H	Y	M	VYCRNTGGRY	1	2.99e-06	76.891	68.625	76.891	-0.57622	49712000	NaN	NaN	1	NaN	NaN	76.891
O95425	1080	O95425	O95425	Supervillin	SVIL	QTGTAAGKTIAQTTAPVSWKPQDSSEQPQEK	632	P	3	1221		QTGTAAGKTI	A	Q	T	T	A	P	V	S	W	K	P	QDSSEQPQEK	0.989807	0.0330193	56.72	54.034	56.72	-2.2935	33507000	0.989807	NaN	NaN	56.72	NaN	NaN
O95425	1085	O95425	O95425	Supervillin	SVIL	AGKTIAQTTAPVSWKPQDSSEQPQEKLCKNP	633	P	3	1221		AGKTIAQTTA	P	V	S	W	K	P	Q	D	S	S	E	QPQEKLCKNP	0.988134	0.0330193	56.72	54.034	56.72	-2.2935	33507000	0.988134	NaN	NaN	56.72	NaN	NaN
O95433	266	O95433	O95433	Activator of 90 kDa heat shock protein ATPase homolog 1	AHSA1	HMVDGNVSGEFTDLVPEKHIVMKWRFKSWPE	634	P	5	1224		HMVDGNVSGE	F	T	D	L	V	P	E	K	H	I	V	MKWRFKSWPE	1	0.000345976	67.364	58.397	67.364	-1.093	632780000	1	1	NaN	42.904	67.364	NaN
O95433	128	O95433	O95433	Activator of 90 kDa heat shock protein ATPase homolog 1	AHSA1	SVDEVEISVSLAKDEPDTNLVALMKEEGVKL	635	P	5	1224		SVDEVEISVS	L	A	K	D	E	P	D	T	N	L	V	ALMKEEGVKL	1	2.25e-11	79.649	75.978	79.649	-1.5997	95466000	NaN	1	0.999837	NaN	79.649	41.097
O95573	83	O95573	O95573	Long-chain-fatty-acid--CoA ligase 3	ACSL3	YRSVNSLDGLASVLYPGCDTLDKVFTYAKNK	640	P	2	1242		YRSVNSLDGL	A	S	V	L	Y	P	G	C	D	T	L	DKVFTYAKNK	1	0.00250513	85.837	73.07	85.837	-0.25815	17573000	1	NaN	NaN	85.837	NaN	NaN
O95602	962	O95602	O95602	DNA-directed RNA polymerase I subunit RPA1	POLR1A	AGGFVTGRFLTGIKPPEFFFHCMAGREGLVD	641	P	4	1243		AGGFVTGRFL	T	G	I	K	P	P	E	F	F	F	H	CMAGREGLVD	0.754696	0.0198448	42.321	30.356	42.321	1.1905	27427000	NaN	0.754696	NaN	NaN	42.321	NaN
O95602	1668	O95602	O95602	DNA-directed RNA polymerase I subunit RPA1	POLR1A	VYKPLNRFGIRSNSSPLQQMTFETSFQFLKQ	643	P	3	1243		VYKPLNRFGI	R	S	N	S	S	P	L	Q	Q	M	T	FETSFQFLKQ	1	7.75e-05	97.284	94.046	97.284	-1.2527	103760000	NaN	NaN	1	NaN	NaN	97.284
O95613	1758	O95613	O95613	Pericentrin	PCNT	HEVIEKLQHELSLMGPVVHEVSDSQAGSLQS	648	P	4	1244		HEVIEKLQHE	L	S	L	M	G	P	V	V	H	E	V	SDSQAGSLQS	0.999919	0.000589838	40.937	36.405	40.937	-0.13715	5939000	NaN	NaN	0.999919	NaN	NaN	40.937
O95714	354	O95714	O95714	E3 ubiquitin-protein ligase HERC2	HERC2	PLLQRFQSIICRKDAPHSEGDMHLLSGPLSP	654	P	4	1260		PLLQRFQSII	C	R	K	D	A	P	H	S	E	G	D	MHLLSGPLSP	0.999909	6.87e-05	77.681	64.878	77.681	-0.66197	17072000	NaN	0.999909	NaN	NaN	77.681	NaN
O95747	245	O95747	O95747	Serine/threonine-protein kinase OSR1	OXSR1	YPPMKVLMLTLQNDPPSLETGVQDKEMLKKY	658	P	3	1263		YPPMKVLMLT	L	Q	N	D	P	P	S	L	E	T	G	VQDKEMLKKY	0.873673	8.56e-05	112.58	94.283	112.58	-1.3907	128710000	0.852754	0.873673	NaN	65.454	112.58	NaN
O95757	319	O95757	O95757	Heat shock 70 kDa protein 4L	HSPA4L	AQFEQLCASLLARVEPPLKAVMEQANLQRED	661	P	4	1268		AQFEQLCASL	L	A	R	V	E	P	P	L	K	A	V	MEQANLQRED	0.549183	0.000937423	53.259	42.837	53.259	0.92236	109600000	NaN	0.549183	NaN	NaN	53.259	NaN
O95782	490	O95782	O95782	AP-2 complex subunit alpha-1	AP2A1	VQGYAAKTVFEALQAPACHENMVKVGGYILG	663	P	2	1273		VQGYAAKTVF	E	A	L	Q	A	P	A	C	H	E	N	MVKVGGYILG	1	9.09e-07	119.76	77.208	119.76	-3.2218	0	NaN	1	NaN	NaN	119.76	NaN
O95793	564	O95793	O95793	Double-stranded RNA-binding protein Staufen homolog 1	STAU1	ILKLLSELDQQSTEMPRTGNGPMSVCGRC__	664	P	3	1277		ILKLLSELDQ	Q	S	T	E	M	P	R	T	G	N	G	PMSVCGRC__	1	0.00882542	89.548	73.41	68.83	2.4642	18407000	1	NaN	1	89.548	NaN	68.83
O95817	174	O95817	O95817	BAG family molecular chaperone regulator 3	BAG3	AAQPPASHGPERSQSPAASDCSSSSSSASLP	665	P	3	1281		AAQPPASHGP	E	R	S	Q	S	P	A	A	S	D	C	SSSSSSASLP	0.998703	0.0080483	50.215	46.927	50.215	-0.11826	7219800	0.998703	NaN	NaN	50.215	NaN	NaN
O95817	372	O95817	O95817	BAG family molecular chaperone regulator 3	BAG3	PPSEKVEVKVPPAPVPCPPPSPGPSAVPSSP	667	P	3	1281		PPSEKVEVKV	P	P	A	P	V	P	C	P	P	P	S	PGPSAVPSSP	0.967909	7.34e-08	103.27	99.829	103.27	-0.11947	54954000	0.967909	0.861552	NaN	103.27	49.577	NaN
O95819	895	O95819	O95819	Mitogen-activated protein kinase kinase kinase kinase 4	MAP4K4	GFSCDGMRPEAIRQDPTRKGSVVNVNPTNTR	668	P	4	1282		GFSCDGMRPE	A	I	R	Q	D	P	T	R	K	G	S	VVNVNPTNTR	0.519169	0.00130674	48.204	40.945	48.204	-0.79409	10571000	NaN	NaN	0.519169	NaN	NaN	48.204
O95831	173	O95831	O95831	Apoptosis-inducing factor 1, mitochondrial	AIFM1	RVLIVSEDPELPYMRPPLSKELWFSDDPNVT	672	P	4	1285		RVLIVSEDPE	L	P	Y	M	R	P	P	L	S	K	E	LWFSDDPNVT	0.648097	0.00309106	63.337	44.045	46.783	0.90302	23890000	NaN	0.371823	0.648097	NaN	59.003	63.337
O95831	174	O95831	O95831	Apoptosis-inducing factor 1, mitochondrial	AIFM1	VLIVSEDPELPYMRPPLSKELWFSDDPNVTK	673	P	4	1285		VLIVSEDPEL	P	Y	M	R	P	P	L	S	K	E	L	WFSDDPNVTK	0.648097	0.00309106	63.337	44.045	46.783	0.90302	23890000	NaN	0.371823	0.648097	NaN	59.003	63.337
O95881	100	O95881	O95881	Thioredoxin domain-containing protein 12	TXNDC12	LSHNFVMVNLEDEEEPKDEDFSPDGGYIPRI	675	P	5	1298		LSHNFVMVNL	E	D	E	E	E	P	K	D	E	D	F	SPDGGYIPRI	0.92139	0.000135864	45.47	42.733	45.47	2.0617	13614000	0.92139	NaN	NaN	45.47	NaN	NaN
O95985	318	O95985	O95985	DNA topoisomerase 3-beta-1	TOP3B	TVEMLRVASSSLGMGPQHAMQTAERLYTQGY	677	P	3	1306		TVEMLRVASS	S	L	G	M	G	P	Q	H	A	M	Q	TAERLYTQGY	1	0.00649292	55.864	46.284	55.864	-0.28281	17923000	1	NaN	NaN	55.864	NaN	NaN
O96008	78	O96008	O96008	Mitochondrial import receptor subunit TOM40 homolog	TOMM40	ASASGAAEDGACGCLPNPGTFEECHRKCKEL	679	P	4	1314		ASASGAAEDG	A	C	G	C	L	P	N	P	G	T	F	EECHRKCKEL	0.999906	6.3e-07	109.08	107.46	40.456	-0.24079	860810000	0.999906	0.94186	0.884464	109.08	98.236	70.889
O96008	80	O96008	O96008	Mitochondrial import receptor subunit TOM40 homolog	TOMM40	ASGAAEDGACGCLPNPGTFEECHRKCKELFP	680	P	4	1314		ASGAAEDGAC	G	C	L	P	N	P	G	T	F	E	E	CHRKCKELFP	0.999906	0.0114647	40.456	38.67	40.456	-0.24079	15314000	0.999906	NaN	NaN	40.456	NaN	NaN
O96013	284	O96013	O96013	Serine/threonine-protein kinase PAK 4	PAK4	PQLAPPACTPAAPAVPGPPGPRSPQREPQRV	681	P	4	1316		PQLAPPACTP	A	A	P	A	V	P	G	P	P	G	P	RSPQREPQRV	0.718848	1.94e-05	48.08	46.147	48.08	-0.598	18065000	NaN	NaN	0.718848	NaN	NaN	48.08
O96013	286	O96013	O96013	Serine/threonine-protein kinase PAK 4	PAK4	LAPPACTPAAPAVPGPPGPRSPQREPQRVSH	682	P	4	1316		LAPPACTPAA	P	A	V	P	G	P	P	G	P	R	S	PQREPQRVSH	0.718848	1.94e-05	48.08	46.147	48.08	-0.598	18065000	NaN	NaN	0.718848	NaN	NaN	48.08
O96013	287	O96013	O96013	Serine/threonine-protein kinase PAK 4	PAK4	APPACTPAAPAVPGPPGPRSPQREPQRVSHE	683	P	4	1316		APPACTPAAP	A	V	P	G	P	P	G	P	R	S	P	QREPQRVSHE	0.718848	1.94e-05	48.08	46.147	48.08	-0.598	18065000	NaN	NaN	0.718848	NaN	NaN	48.08
O96013	289	O96013	O96013	Serine/threonine-protein kinase PAK 4	PAK4	PACTPAAPAVPGPPGPRSPQREPQRVSHEQF	684	P	4	1316		PACTPAAPAV	P	G	P	P	G	P	R	S	P	Q	R	EPQRVSHEQF	0.718848	1.94e-05	48.08	46.147	48.08	-0.598	18065000	NaN	NaN	0.718848	NaN	NaN	48.08
O96013	292	O96013	O96013	Serine/threonine-protein kinase PAK 4	PAK4	TPAAPAVPGPPGPRSPQREPQRVSHEQFRAA	685	P	4	1316		TPAAPAVPGP	P	G	P	R	S	P	Q	R	E	P	Q	RVSHEQFRAA	0.722024	1.94e-05	48.08	46.147	48.08	-0.598	18065000	NaN	NaN	0.722024	NaN	NaN	48.08
O96013	296	O96013	O96013	Serine/threonine-protein kinase PAK 4	PAK4	PAVPGPPGPRSPQREPQRVSHEQFRAALQLV	686	P	4	1316		PAVPGPPGPR	S	P	Q	R	E	P	Q	R	V	S	H	EQFRAALQLV	0.7311	1.94e-05	48.08	46.147	48.08	-0.598	18065000	NaN	NaN	0.7311	NaN	NaN	48.08
O96019	126	O96019	O96019	Actin-like protein 6A	ACTL6A	VKSEASLHPVLMSEAPWNTRAKREKLTELMF	690	P	2	1319		VKSEASLHPV	L	M	S	E	A	P	W	N	T	R	A	KREKLTELMF	1	0.0024921	80.979	60.026	70.488	-0.048996	96482000	1	1	NaN	70.488	80.979	NaN
O96028	137	O96028	O96028	Histone-lysine N-methyltransferase NSD2	WHSC1	PEIKLKITKTYMNGKPLFESSICGDSAADVS	691	P	4	1321		PEIKLKITKT	Y	M	N	G	K	P	L	F	E	S	S	ICGDSAADVS	0.999999	6.1e-07	63.033	59.218	63.033	0.16522	127020000	0.999999	NaN	0.999997	63.033	NaN	55.033
P00338	292	P00338	P00338	L-lactate dehydrogenase A chain	LDHA	IKGLYGIKDDVFLSVPCILGQNGISDLVKVT	692	P	4	1325		IKGLYGIKDD	V	F	L	S	V	P	C	I	L	G	Q	NGISDLVKVT	1	1.4e-17	155.88	145.96	56.239	0.1401	6941100000	1	1	1	145.79	154.47	155.88
P00338	182	P00338	P00338	L-lactate dehydrogenase A chain	LDHA	SARFRYLMGERLGVHPLSCHGWVLGEHGDSS	693	P	4	1325		SARFRYLMGE	R	L	G	V	H	P	L	S	C	H	G	WVLGEHGDSS	1	1.89e-13	91.942	87.227	40.671	0.3751	5701100000	1	1	1	91.407	91.942	63.033
P00338	199	P00338	P00338	L-lactate dehydrogenase A chain	LDHA	SCHGWVLGEHGDSSVPVWSGMNVAGVSLKTL	694	P	4	1325		SCHGWVLGEH	G	D	S	S	V	P	V	W	S	G	M	NVAGVSLKTL	1	2.4e-08	91.398	86.589	40.671	0.3751	6312700000	1	1	1	91.398	76.956	63.033
P00374	104	P00374	P00374	Dihydrofolate reductase	DHFR	FLSRSLDDALKLTEQPELANKVDMVWIVGGS	695	P	3	1327		FLSRSLDDAL	K	L	T	E	Q	P	E	L	A	N	K	VDMVWIVGGS	1	0.0183291	58.373	45.571	58.373	0.90209	14592000	NaN	NaN	1	NaN	NaN	58.373
P00395	499	P00395	P00395	Cytochrome c oxidase subunit 1	MT-CO1	MVEEPSMNLEWLYGCPPPYHTFEEPVYMKS_	699	P	3	1330		MVEEPSMNLE	W	L	Y	G	C	P	P	P	Y	H	T	FEEPVYMKS_	0.756836	5.89e-06	96.568	96.568	61.911	-0.084549	75859000	NaN	0.756836	0.305224	NaN	93.147	96.568
P00395	501	P00395	P00395	Cytochrome c oxidase subunit 1	MT-CO1	EEPSMNLEWLYGCPPPYHTFEEPVYMKS___	701	P	4	1330		EEPSMNLEWL	Y	G	C	P	P	P	Y	H	T	F	E	EPVYMKS___	0.522982	0.00150903	54.934	54.934	54.934	-2.2186	93410000	NaN	0.291965	0.522982	NaN	47.73	54.934
P00403	208	P00403	P00403	Cytochrome c oxidase subunit 2	MT-CO2	YGQCSEICGANHSFMPIVLELIPLKIFEMGP	703	P	3	1331		YGQCSEICGA	N	H	S	F	M	P	I	V	L	E	L	IPLKIFEMGP	0.996852	6.84e-06	53.648	49.574	53.648	-0.65283	70559000	0.996852	NaN	NaN	53.648	NaN	NaN
P00403	166	P00403	P00403	Cytochrome c oxidase subunit 2	MT-CO2	RMMITSQDVLHSWAVPTLGLKTDAIPGRLNQ	704	P	4	1331		RMMITSQDVL	H	S	W	A	V	P	T	L	G	L	K	TDAIPGRLNQ	1	7.09e-05	93.684	85.595	74.456	-0.12119	3941400000	1	1	NaN	93.684	68.689	NaN
P00403	176	P00403	P00403	Cytochrome c oxidase subunit 2	MT-CO2	HSWAVPTLGLKTDAIPGRLNQTTFTATRPGV	705	P	4	1331		HSWAVPTLGL	K	T	D	A	I	P	G	R	L	N	Q	TTFTATRPGV	1	7.09e-05	74.456	65.949	74.456	-0.12119	513960000	1	1	NaN	74.456	68.689	NaN
P00505	158	P00505	P00505	Aspartate aminotransferase, mitochondrial	GOT2	SFLQRFFKFSRDVFLPKPTWGNHTPIFRDAG	706	P	3	1336		SFLQRFFKFS	R	D	V	F	L	P	K	P	T	W	G	NHTPIFRDAG	0.995799	0.0018254	97.129	88.31	87.429	0.30641	400600000	0.995799	0.922431	NaN	88.385	97.129	NaN
P00505	160	P00505	P00505	Aspartate aminotransferase, mitochondrial	GOT2	LQRFFKFSRDVFLPKPTWGNHTPIFRDAGMQ	707	P	3	1336		LQRFFKFSRD	V	F	L	P	K	P	T	W	G	N	H	TPIFRDAGMQ	0.999986	0.0018254	97.129	88.31	87.429	0.30641	509750000	0.999986	0.999885	0.993769	88.385	97.129	75.463
P00505	167	P00505	P00505	Aspartate aminotransferase, mitochondrial	GOT2	SRDVFLPKPTWGNHTPIFRDAGMQLQGYRYY	708	P	4	1336		SRDVFLPKPT	W	G	N	H	T	P	I	F	R	D	A	GMQLQGYRYY	0.997444	0.00171738	68.919	56.995	59.628	1.2983	130200000	0	0.983174	0.997444	NaN	68.919	59.628
P00558	67	P00558	P00558	Phosphoglycerate kinase 1	PGK1	DNGAKSVVLMSHLGRPDGVPMPDKYSLEPVA	709	P	4	1339		DNGAKSVVLM	S	H	L	G	R	P	D	G	V	P	M	PDKYSLEPVA	0.999968	5.53e-06	119.97	119.97	94.946	-0.19617	30644000000	0.999968	0.999879	0.991925	119.97	107.2	88.014
P00558	73	P00558	P00558	Phosphoglycerate kinase 1	PGK1	VVLMSHLGRPDGVPMPDKYSLEPVAVELKSL	711	P	4	1339		VVLMSHLGRP	D	G	V	P	M	P	D	K	Y	S	L	EPVAVELKSL	0.910559	4.53e-39	181.95	167.36	181.95	-0.28267	8642300000	0.575831	0.788321	0.910559	67.69	132.76	181.95
P00568	68	P00568	P00568	Adenylate kinase isoenzyme 1	AK1	RGKKLSEIMEKGQLVPLETVLDMLRDAMVAK	716	P	3	1340		RGKKLSEIME	K	G	Q	L	V	P	L	E	T	V	L	DMLRDAMVAK	1	0.0211354	54.744	48.713	54.744	0.14554	18644000	NaN	NaN	1	NaN	NaN	54.744
P00918	13	P00918	P00918	Carbonic anhydrase 2	CA2	___MSHHWGYGKHNGPEHWHKDFPIAKGERQ	717	P	4	1345		___MSHHWGY	G	K	H	N	G	P	E	H	W	H	K	DFPIAKGERQ	0.999999	0.000192506	98.676	92.854	92.063	-1.7993	430040000	0.999999	0.999843	0.999999	98.676	85.006	92.063
P00918	236	P00918	P00918	Carbonic anhydrase 2	CA2	QVLKFRKLNFNGEGEPEELMVDNWRPAQPLK	718	P	2	1345		QVLKFRKLNF	N	G	E	G	E	P	E	E	L	M	V	DNWRPAQPLK	1	2.94e-30	175.45	158.17	99.927	0.58078	935730000	0.999995	1	1	126.48	175.45	166.09
P00918	246	P00918	P00918	Carbonic anhydrase 2	CA2	NGEGEPEELMVDNWRPAQPLKNRQIKASFK_	719	P	2	1345		NGEGEPEELM	V	D	N	W	R	P	A	Q	P	L	K	NRQIKASFK_	1	3.57e-14	141.69	126.63	99.927	0.58078	12541000000	1	1	1	130.49	141.69	112.85
P00918	249	P00918	P00918	Carbonic anhydrase 2	CA2	GEPEELMVDNWRPAQPLKNRQIKASFK____	720	P	2	1345		GEPEELMVDN	W	R	P	A	Q	P	L	K	N	R	Q	IKASFK____	1	3.57e-14	141.69	126.63	99.927	0.58078	12433000000	0.999994	1	1	130.49	141.69	112.85
P02458	1233	P02458	P02458	Collagen alpha-1(II) chain;Collagen alpha-1(II) chain;Chondrocalcin	COL2A1	IDMSAFAGLGPREKGPDPLQYMRADQAAGGL	726	P	3	1358		IDMSAFAGLG	P	R	E	K	G	P	D	P	L	Q	Y	MRADQAAGGL	0.998523	0.0164201	93.561	77.424	84.658	0.22011	63342000	0.998523	0.997993	NaN	84.658	93.561	NaN
P02458	1144	P02458	P02458	Collagen alpha-1(II) chain;Collagen alpha-1(II) chain;Chondrocalcin	COL2A1	LKGHRGFTGLQGLPGPPGPSGDQGASGPAGP	733	P	2	1358		LKGHRGFTGL	Q	G	L	P	G	P	P	G	P	S	G	DQGASGPAGP	0.681559	0.00262238	58.49	45.371	58.49	3.7213	54376000	0.681559	NaN	NaN	58.49	NaN	NaN
P02458	1145	P02458	P02458	Collagen alpha-1(II) chain;Collagen alpha-1(II) chain;Chondrocalcin	COL2A1	KGHRGFTGLQGLPGPPGPSGDQGASGPAGPS	734	P	2	1358		KGHRGFTGLQ	G	L	P	G	P	P	G	P	S	G	D	QGASGPAGPS	0.681559	0.00262238	58.49	45.371	58.49	3.7213	54376000	0.681559	0.442397	NaN	58.49	54.466	NaN
P02458	1147	P02458	P02458	Collagen alpha-1(II) chain;Collagen alpha-1(II) chain;Chondrocalcin	COL2A1	HRGFTGLQGLPGPPGPSGDQGASGPAGPSGP	735	P	2	1358		HRGFTGLQGL	P	G	P	P	G	P	S	G	D	Q	G	ASGPAGPSGP	0.681559	0.00262238	58.49	45.371	58.49	3.7213	54376000	0.681559	0.442397	NaN	58.49	54.466	NaN
P02458	1114	P02458	P02458	Collagen alpha-1(II) chain;Collagen alpha-1(II) chain;Chondrocalcin	COL2A1	PSGPAGARGIQGPQGPRGDKGEAGEPGERGL	736	P	3	1358		PSGPAGARGI	Q	G	P	Q	G	P	R	G	D	K	G	EAGEPGERGL	0.960097	0.00263892	77.391	67.83	77.391	-1.6136	32004000	NaN	0.960097	NaN	NaN	77.391	NaN
P02458	1124	P02458	P02458	Collagen alpha-1(II) chain;Collagen alpha-1(II) chain;Chondrocalcin	COL2A1	QGPQGPRGDKGEAGEPGERGLKGHRGFTGLQ	737	P	3	1358		QGPQGPRGDK	G	E	A	G	E	P	G	E	R	G	L	KGHRGFTGLQ	0.999976	0.00263892	77.391	67.83	77.391	-1.6136	19552000	NaN	0.999976	NaN	NaN	77.391	NaN
P02458	986	P02458	P02458	Collagen alpha-1(II) chain;Collagen alpha-1(II) chain;Chondrocalcin	COL2A1	PGPQGLAGQRGIVGLPGQRGERGFPGLPGPS	738	P	2	1358		PGPQGLAGQR	G	I	V	G	L	P	G	Q	R	G	E	RGFPGLPGPS	1	0.0319368	142.43	108.17	142.43	0.07895	26300000	NaN	1	NaN	NaN	142.43	NaN
P02458	907	P02458	P02458	Collagen alpha-1(II) chain;Collagen alpha-1(II) chain;Chondrocalcin	COL2A1	PPGATGFPGAAGRVGPPGSNGNPGPPGPPGP	750	P	2	1358		PPGATGFPGA	A	G	R	V	G	P	P	G	S	N	G	NPGPPGPPGP	0.516253	0.00372874	72.175	50.618	72.175	1.3502	2066800	NaN	0.498007	0.516253	NaN	68.972	72.175
P02458	908	P02458	P02458	Collagen alpha-1(II) chain;Collagen alpha-1(II) chain;Chondrocalcin	COL2A1	PGATGFPGAAGRVGPPGSNGNPGPPGPPGPS	751	P	2	1358		PGATGFPGAA	G	R	V	G	P	P	G	S	N	G	N	PGPPGPPGPS	0.84735	0.00372874	72.175	50.618	62.378	0.34378	4354900	NaN	0.84735	0.516253	NaN	68.972	72.175
P02458	914	P02458	P02458	Collagen alpha-1(II) chain;Collagen alpha-1(II) chain;Chondrocalcin	COL2A1	PGAAGRVGPPGSNGNPGPPGPPGPSGKDGPK	752	P	2	1358		PGAAGRVGPP	G	S	N	G	N	P	G	P	P	G	P	PGPSGKDGPK	0.944704	0.00372874	72.175	50.618	72.175	1.3502	4354900	NaN	0.864297	0.944704	NaN	62.378	72.175
P02458	917	P02458	P02458	Collagen alpha-1(II) chain;Collagen alpha-1(II) chain;Chondrocalcin	COL2A1	AGRVGPPGSNGNPGPPGPPGPSGKDGPKGAR	753	P	2	1358		AGRVGPPGSN	G	N	P	G	P	P	G	P	P	G	P	SGKDGPKGAR	0.7858	0.00372874	72.175	50.618	62.378	0.34378	8346500	NaN	0.7858	0.631165	NaN	68.972	72.175
P02458	920	P02458	P02458	Collagen alpha-1(II) chain;Collagen alpha-1(II) chain;Chondrocalcin	COL2A1	VGPPGSNGNPGPPGPPGPSGKDGPKGARGDS	754	P	2	1358		VGPPGSNGNP	G	P	P	G	P	P	G	P	S	G	K	DGPKGARGDS	0.771932	0.00372874	72.175	50.618	62.378	0.34378	4354900	NaN	0.771932	0.628567	NaN	62.378	72.175
P02458	587	P02458	P02458	Collagen alpha-1(II) chain;Collagen alpha-1(II) chain;Chondrocalcin	COL2A1	QGKVGPSGAPGEDGRPGPPGPQGARGQPGVM	756	P	3	1358		QGKVGPSGAP	G	E	D	G	R	P	G	P	P	G	P	QGARGQPGVM	0.527945	1.7e-06	87.156	67.602	47.808	-0.35713	33117000	0.527945	0.496295	0.24995	79.635	87.156	72.644
P02458	589	P02458	P02458	Collagen alpha-1(II) chain;Collagen alpha-1(II) chain;Chondrocalcin	COL2A1	KVGPSGAPGEDGRPGPPGPQGARGQPGVMGF	757	P	3	1358		KVGPSGAPGE	D	G	R	P	G	P	P	G	P	Q	G	ARGQPGVMGF	0.525751	0.000932409	80.156	55.747	47.808	-0.35713	33117000	0.525751	0.496295	0.24995	79.635	80.156	72.644
P02458	590	P02458	P02458	Collagen alpha-1(II) chain;Collagen alpha-1(II) chain;Chondrocalcin	COL2A1	VGPSGAPGEDGRPGPPGPQGARGQPGVMGFP	758	P	3	1358		VGPSGAPGED	G	R	P	G	P	P	G	P	Q	G	A	RGQPGVMGFP	0.525751	0.000932409	80.98	63.683	47.808	-0.35713	52586000	0.525751	0.496295	0.24995	80.98	80.156	72.644
P02545	508	P02545	P02545	Prelamin-A/C;Lamin-A/C	LMNA	QVVTIWAAGAGATHSPPTDLVWKAQNTWGCG	768	P	3	1360		QVVTIWAAGA	G	A	T	H	S	P	P	T	D	L	V	WKAQNTWGCG	1	6.24e-06	122.04	102.06	54.728	1.5169	151450000	NaN	1	1	NaN	122.04	55.588
P02545	509	P02545	P02545	Prelamin-A/C;Lamin-A/C	LMNA	VVTIWAAGAGATHSPPTDLVWKAQNTWGCGN	769	P	3	1360		VVTIWAAGAG	A	T	H	S	P	P	T	D	L	V	W	KAQNTWGCGN	1	6.24e-06	122.04	102.06	54.728	1.5169	151450000	NaN	1	1	NaN	122.04	55.588
P02545	594	P02545	P02545	Prelamin-A/C;Lamin-A/C	LMNA	YNLRSRTVLCGTCGQPADKASASGSGAQVGG	770	P	4	1360		YNLRSRTVLC	G	T	C	G	Q	P	A	D	K	A	S	ASGSGAQVGG	0.930838	0.000197422	42.782	41.338	42.782	2.5141	43706000	0.781794	NaN	0.930838	42.015	NaN	42.782
P02786	516	P02786	P02786	Transferrin receptor protein 1;Transferrin receptor protein 1, serum form	TFRC	LLYTLIEKTMQNVKHPVTGQFLYQDSNWASK	771	P	3	1367		LLYTLIEKTM	Q	N	V	K	H	P	V	T	G	Q	F	LYQDSNWASK	1	0.00152377	59.814	53.719	50.215	0.70125	285930000	1	NaN	NaN	59.814	NaN	NaN
P04040	70	P04040	P04040	Catalase	CAT	VVFTDEMAHFDRERIPERVVHAKGAGAFGYF	772	P	4	1377		VVFTDEMAHF	D	R	E	R	I	P	E	R	V	V	H	AKGAGAFGYF	1	3.36e-09	125.04	114.8	125.04	0.064982	4391400000	1	1	1	125.04	119.01	117.38
P04066	403	P04066	P04066	Tissue alpha-L-fucosidase	FUCA1	YTSKGSAVYAIFLHWPENGVLNLESPITTST	778	P	3	1380		YTSKGSAVYA	I	F	L	H	W	P	E	N	G	V	L	NLESPITTST	0.999985	6.53e-05	78.65	73.645	78.65	-3.8639	20918000	NaN	0.999985	NaN	NaN	78.65	NaN
P04075	236	P04075	P04075	Fructose-bisphosphate aldolase A	ALDOA	HIYLEGTLLKPNMVTPGHACTQKFSHEEIAM	780	P	6	1381		HIYLEGTLLK	P	N	M	V	T	P	G	H	A	C	T	QKFSHEEIAM	1	0.00309844	100.57	89.058	40.428	-0.66069	2024000000	1	0.999999	0.999999	100.57	80.231	78.098
P04075	2	P04075	P04075	Fructose-bisphosphate aldolase A	ALDOA	______________MPYQYPALTPEQKKELS	781	P	2	1381		__________	_	_	_	_	M	P	Y	Q	Y	P	A	LTPEQKKELS	0.999993	2.07e-16	153.11	147.26	86.344	0.42008	4101100000	0.999979	0.999981	0.999993	153.11	137.05	123.43
P04080	6	P04080	P04080	Cystatin-B	CSTB	__________MMCGAPSATQPATAETQHIAD	782	P	3	1382		__________	M	M	C	G	A	P	S	A	T	Q	P	ATAETQHIAD	0.999998	4.02e-07	108.4	105.52	108.4	0.38505	245070000	0.999998	0.874784	0.999678	108.4	58.974	73.546
P04083	115	P04083	P04083	Annexin A1	ANXA1	LTGHLEEVVLALLKTPAQFDADELRAAMKGL	783	P	4	1383		LTGHLEEVVL	A	L	L	K	T	P	A	Q	F	D	A	DELRAAMKGL	1	7.45e-06	120.74	110.95	120.74	1.1789	84889000	NaN	NaN	1	NaN	NaN	120.74
P04181	231	P04181	P04181	Ornithine aminotransferase, mitochondrial;Ornithine aminotransferase, hepatic form;Ornithine aminotransferase, renal form	OAT	ERALQDPNVAAFMVEPIQGEAGVVVPDPGYL	784	P	3	1386		ERALQDPNVA	A	F	M	V	E	P	I	Q	G	E	A	GVVVPDPGYL	0.928911	7.52e-07	66.902	60.408	66.902	0.058583	680170000	0	0.928911	0	NaN	66.902	NaN
P04181	243	P04181	P04181	Ornithine aminotransferase, mitochondrial;Ornithine aminotransferase, hepatic form;Ornithine aminotransferase, renal form	OAT	MVEPIQGEAGVVVPDPGYLMGVRELCTRHQV	785	P	3	1386		MVEPIQGEAG	V	V	V	P	D	P	G	Y	L	M	G	VRELCTRHQV	0.968372	3.67e-07	97.437	97.437	97.437	-0.83451	8579700000	0.832403	0.964219	0.968372	61.082	89.129	97.437
P04350	160	P04350	P04350	Tubulin beta-4A chain	TUBB4A	SGMGTLLISKIREEFPDRIMNTFSVVPSPKV	790	P	3	1388		SGMGTLLISK	I	R	E	E	F	P	D	R	I	M	N	TFSVVPSPKV	0.998691	0.0126992	58.49	7.1419	58.49	0.17708	48669000	NaN	NaN	0.998691	NaN	NaN	58.49
P04350;P07437;P68371;Q13885;Q9BVA1	220;220;220;220;220	P04350;P07437;P68371;Q13885;Q9BVA1	P68371	Tubulin beta-4A chain;Tubulin beta chain;Tubulin beta-4B chain;Tubulin beta-2A chain;Tubulin beta-2B chain	TUBB4A;TUBB;TUBB4B;TUBB2A;TUBB2B	EALYDICFRTLKLTTPTYGDLNHLVSATMSG	791	P	3	1388;1461;3076;3678;7544		EALYDICFRT	L	K	L	T	T	P	T	Y	G	D	L	NHLVSATMSG	1	2.76e-09	77.31	73.236	40.669	-1.21	4081500000	1	1	1	67.064	55.033	77.31
P04350;P07437;P68371;Q13509;Q13885;Q9BUF5;Q9BVA1	346;346;346;346;346;346;346	P04350;P07437;P68371;Q13509;Q13885;Q9BUF5;Q9BVA1	P68371	Tubulin beta-4A chain;Tubulin beta chain;Tubulin beta-4B chain;Tubulin beta-3 chain;Tubulin beta-2A chain;Tubulin beta-6 chain;Tubulin beta-2B chain	TUBB4A;TUBB;TUBB4B;TUBB3;TUBB2A;TUBB6;TUBB2B	LAIQSKNSSYFVEWIPNNVKVAVCDIPPRGL;LNVQNKNSSYFVEWIPNNVKTAVCDIPPRGL;LSVQSKNSSYFVEWIPNNVKTAVCDIPPRGL	792	P	2	1388;1461;3076;3612;3678;7499;7544		LAIQSKNSSY	F	V	E	W	I	P	N	N	V	K	V	AVCDIPPRGL	1	4.18e-09	162	149.79	97.452	-3.6252	3992500000	1	1	1	159.09	148.28	162
P04350;P07437;P68371;Q13885;Q9BVA1	87;87;87;87;87	P04350;P07437;P68371;Q13885;Q9BVA1	P68371	Tubulin beta-4A chain;Tubulin beta chain;Tubulin beta-4B chain;Tubulin beta-2A chain;Tubulin beta-2B chain	TUBB4A;TUBB;TUBB4B;TUBB2A;TUBB2B	TMDSVRSGPFGQIFRPDNFVFGQSGAGNNWA	793	P	3	1388;1461;3076;3678;7544		TMDSVRSGPF	G	Q	I	F	R	P	D	N	F	V	F	GQSGAGNNWA	0.999996	0.021456	54.072	45.908	54.072	-3.7852	95209000	NaN	0.999996	NaN	NaN	54.072	NaN
P04406	159	P04406	P04406	Glyceraldehyde-3-phosphate dehydrogenase	GAPDH	LKIISNASCTTNCLAPLAKVIHDNFGIVEGL	794	P	2	1389		LKIISNASCT	T	N	C	L	A	P	L	A	K	V	I	HDNFGIVEGL	1	0.00578563	115.33	90.473	87.667	-0.55271	2963400000	1	1	1	87.667	115.33	81.92
P04406	236	P04406	P04406	Glyceraldehyde-3-phosphate dehydrogenase	GAPDH	IPELNGKLTGMAFRVPTANVSVVDLTCRLEK	795	P	4	1389		IPELNGKLTG	M	A	F	R	V	P	T	A	N	V	S	VVDLTCRLEK	1	0.000235603	98.967	92.152	41.208	-0.76933	1276700000	1	1	1	72.015	98.967	74.364
P04406	36	P04406	P04406	Glyceraldehyde-3-phosphate dehydrogenase	GAPDH	AAFNSGKVDIVAINDPFIDLNYMVYMFQYDS	797	P	6	1389		AAFNSGKVDI	V	A	I	N	D	P	F	I	D	L	N	YMVYMFQYDS	1	1.12e-05	56.957	54.209	53.091	-1.3263	368160000	1	1	1	56.957	53.091	54.583
P04844	226	P04844	P04844	Dolichyl-diphosphooligosaccharide--protein glycosyltransferase subunit 2	RPN2	FVAATYKLMDHVGTEPSIKEDQVIQLMNAIF	800	P	5	1398		FVAATYKLMD	H	V	G	T	E	P	S	I	K	E	D	QVIQLMNAIF	1	3.02e-09	130.65	124.94	45.332	-1.0564	731250000	NaN	1	1	NaN	108.44	130.65
P05023	83	P05023	P05023	Sodium/potassium-transporting ATPase subunit alpha-1	ATP1A1	AAEILARDGPNALTPPPTTPEWIKFCRQLFG	801	P	2	1401		AAEILARDGP	N	A	L	T	P	P	P	T	T	P	E	WIKFCRQLFG	0.689941	0.0273098	67.456	39.174	67.456	1.9982	53606000	0	0.689941	NaN	NaN	67.456	NaN
P05023	84	P05023	P05023	Sodium/potassium-transporting ATPase subunit alpha-1	ATP1A1	AEILARDGPNALTPPPTTPEWIKFCRQLFGG	802	P	2	1401		AEILARDGPN	A	L	T	P	P	P	T	T	P	E	W	IKFCRQLFGG	0.965635	0.00381323	115.92	98.709	115.92	-0.099832	352040000	0.965635	0.853695	0.876408	115.92	98.407	105.03
P05023	87	P05023	P05023	Sodium/potassium-transporting ATPase subunit alpha-1	ATP1A1	LARDGPNALTPPPTTPEWIKFCRQLFGGFSM	803	P	2	1401		LARDGPNALT	P	P	P	T	T	P	E	W	I	K	F	CRQLFGGFSM	0.965635	0.00381323	115.92	98.709	115.92	-0.099832	352040000	0.965635	0.853695	0.876408	115.92	98.407	105.03
P05023	501	P05023	P05023	Sodium/potassium-transporting ATPase subunit alpha-1	ATP1A1	NKYQLSIHKNPNTSEPQHLLVMKGAPERILD	804	P	6	1401		NKYQLSIHKN	P	N	T	S	E	P	Q	H	L	L	V	MKGAPERILD	0.860402	9.53e-05	50.492	45.824	50.492	0.14112	2731900000	0.860402	NaN	NaN	50.492	NaN	NaN
P05386	41	P05386	P05386	60S acidic ribosomal protein P1	RPLP1	DKINALIKAAGVNVEPFWPGLFAKALANVNI	806	P	2	1414		DKINALIKAA	G	V	N	V	E	P	F	W	P	G	L	FAKALANVNI	1	3.02e-05	136.02	122.34	112.13	0.86956	7929800000	1	1	1	124.1	129.84	136.02
P05386	44	P05386	P05386	60S acidic ribosomal protein P1	RPLP1	NALIKAAGVNVEPFWPGLFAKALANVNIGSL	807	P	2	1414		NALIKAAGVN	V	E	P	F	W	P	G	L	F	A	K	ALANVNIGSL	1	3.02e-05	136.02	122.34	112.13	0.86956	8707700000	1	1	1	124.42	128.01	136.02
P05386	68	P05386	P05386	60S acidic ribosomal protein P1	RPLP1	NVNIGSLICNVGAGGPAPAAGAAPAGGPAPS	808	P	4	1414		NVNIGSLICN	V	G	A	G	G	P	A	P	A	A	G	AAPAGGPAPS	0.954591	7.17e-17	100.71	97.307	80.749	-1.3673	2530900000	0.954591	0.947861	0.923913	100.71	69.344	83.002
P05388;Q8NHW5	118;118	P05388	P05388	60S acidic ribosomal protein P0;60S acidic ribosomal protein P0-like	RPLP0;RPLP0P6	LANKVPAAARAGAIAPCEVTVPAQNTGLGPE	810	P	3	1416		LANKVPAAAR	A	G	A	I	A	P	C	E	V	T	V	PAQNTGLGPE	0.999886	0.000402579	80.706	67.873	72.145	1.0778	1494200000	0.999846	0.999369	0.999886	80.706	75.316	79.022
P05388;Q8NHW5	25;25	P05388	P05388	60S acidic ribosomal protein P0;60S acidic ribosomal protein P0-like	RPLP0;RPLP0P6	KSNYFLKIIQLLDDYPKCFIVGADNVGSKQM	811	P	3	1416		KSNYFLKIIQ	L	L	D	D	Y	P	K	C	F	I	V	GADNVGSKQM	1	0.0300876	57.293	43.972	53.342	0.63434	25230000	NaN	1	1	NaN	57.293	53.342
P05388	232	P05388	P05388	60S acidic ribosomal protein P0	RPLP0	EGVRNVASVCLQIGYPTVASVPHSIINGYKR	812	P	4	1416		EGVRNVASVC	L	Q	I	G	Y	P	T	V	A	S	V	PHSIINGYKR	0.995105	0.0141708	40.094	22.447	40.094	-0.50831	164790000	NaN	NaN	0.995105	NaN	NaN	40.094
P05455	48	P05455	P05455	Lupus La protein	SSB	DKFLKEQIKLDEGWVPLEIMIKFNRLNRLTT	815	P	2	1419		DKFLKEQIKL	D	E	G	W	V	P	L	E	I	M	I	KFNRLNRLTT	1	1e-05	109.84	98.076	109.84	-3.1013	25457000	1	1	NaN	90.614	109.84	NaN
P05455	119	P05455	P05455	Lupus La protein	SSB	YKNDVKNRSVYIKGFPTDATLDDIKEWLEDK	816	P	4	1419		YKNDVKNRSV	Y	I	K	G	F	P	T	D	A	T	L	DDIKEWLEDK	1	0.00206735	58.284	47.18	58.284	3.4895	311990000	1	NaN	NaN	58.284	NaN	NaN
P05556	296	P05556	P05556	Integrin beta-1	ITGB1	GFHFAGDGKLGGIVLPNDGQCHLENNMYTMS	817	P	4	1421		GFHFAGDGKL	G	G	I	V	L	P	N	D	G	Q	C	HLENNMYTMS	0.997504	2.67e-09	63.516	60.618	63.516	0.12643	70264000	0.996694	0.997504	NaN	44.616	63.516	NaN
P06132	307	P06132	P06132	Uroporphyrinogen decarboxylase	UROD	RECVGKTVTLQGNLDPCALYASEEEIGQLVK	818	P	3	1426		RECVGKTVTL	Q	G	N	L	D	P	C	A	L	Y	A	SEEEIGQLVK	1	0.000683469	67.877	65.448	51.857	0.14642	8371800	1	NaN	NaN	67.877	NaN	NaN
P06241	308	P06241	P06241	Tyrosine-protein kinase Fyn	FYN	NTKVAIKTLKPGTMSPESFLEEAQIMKKLKH	820	P	3	1428		NTKVAIKTLK	P	G	T	M	S	P	E	S	F	L	E	EAQIMKKLKH	0.580831	0.000126639	83.776	83.776	83.776	0.28134	23234000	0	0.580831	NaN	NaN	83.776	NaN
P06493	223	P06493	P06493	Cyclin-dependent kinase 1	CDK1	SEIDQLFRIFRALGTPNNEVWPEVESLQDYK	821	P	3	1432		SEIDQLFRIF	R	A	L	G	T	P	N	N	E	V	W	PEVESLQDYK	0.999933	2.75e-08	129.43	117.8	77.693	0.036063	1947000000	0.999933	0.999141	0.999759	129.43	109.39	81.65
P06493	242	P06493	P06493	Cyclin-dependent kinase 1	CDK1	VWPEVESLQDYKNTFPKWKPGSLASHVKNLD	823	P	3	1432		VWPEVESLQD	Y	K	N	T	F	P	K	W	K	P	G	SLASHVKNLD	0.932712	0.00686613	66.467	55.836	66.467	-1.1791	66263000	NaN	0.932712	0	NaN	66.467	NaN
P06493	285	P06493	P06493	Cyclin-dependent kinase 1	CDK1	YDPAKRISGKMALNHPYFNDLDNQIKKM___	824	P	4	1432		YDPAKRISGK	M	A	L	N	H	P	Y	F	N	D	L	DNQIKKM___	1	0.0140425	53.565	44.964	53.565	0.38263	28964000	NaN	NaN	1	NaN	NaN	53.565
P06576	410	P06576	P06576	ATP synthase subunit beta, mitochondrial	ATP5B	YPAVDPLDSTSRIMDPNIVGSEHYDVARGVQ	825	P	4	1433		YPAVDPLDST	S	R	I	M	D	P	N	I	V	G	S	EHYDVARGVQ	0.797451	8.68e-08	70.578	61.96	70.578	-0.54349	61309000	NaN	NaN	0.797451	NaN	NaN	70.578
P06733	172	P06733	P06733	Alpha-enolase	ENO1	SHAGNKLAMQEFMILPVGAANFREAMRIGAE	826	P	3	1436		SHAGNKLAMQ	E	F	M	I	L	P	V	G	A	A	N	FREAMRIGAE	1	1.41e-05	90.729	83.017	90.729	-1.0362	2579300000	NaN	1	1	NaN	87.352	90.729
P06733	295	P06733	P06733	Alpha-enolase	ENO1	YKSFIKDYPVVSIEDPFDQDDWGAWQKFTAS	827	P	2	1436		YKSFIKDYPV	V	S	I	E	D	P	F	D	Q	D	D	WGAWQKFTAS	1	2.04e-05	115.56	105.36	115.56	1.9257	417140000	0.999998	1	0.99998	62.735	115.56	60.33
P06737	382	P06737	P06737	Glycogen phosphorylase, liver form	PYGL	ELTQKTFAYTNHTVLPEALERWPVDLVEKLL	830	P	5	1437		ELTQKTFAYT	N	H	T	V	L	P	E	A	L	E	R	WPVDLVEKLL	0.99995	0.000416742	73.322	71.639	73.322	1.6529	113340000	0.99995	0.999619	0.998655	73.322	72.425	44.811
P06737	389	P06737	P06737	Glycogen phosphorylase, liver form	PYGL	AYTNHTVLPEALERWPVDLVEKLLPRHLEII	831	P	5	1437		AYTNHTVLPE	A	L	E	R	W	P	V	D	L	V	E	KLLPRHLEII	0.99995	0.000416742	73.322	71.639	73.322	1.6529	113340000	0.99995	0.999906	0.999518	73.322	72.425	44.811
P06744	403	P06744	P06744	Glucose-6-phosphate isomerase	GPI	QHAFYQLIHQGTKMIPCDFLIPVQTQHPIRK	833	P	4	1438		QHAFYQLIHQ	G	T	K	M	I	P	C	D	F	L	I	PVQTQHPIRK	0.999872	0.000897843	66.809	65.511	65.107	0.091934	45949000	0.999872	NaN	NaN	66.809	NaN	NaN
P06744	377	P06744	P06744	Glucose-6-phosphate isomerase	GPI	KYITKSGTRVDHQTGPIVWGEPGTNGQHAFY	834	P	6	1438		KYITKSGTRV	D	H	Q	T	G	P	I	V	W	G	E	PGTNGQHAFY	1	9.77e-07	89.793	84.581	41.218	-0.26279	1804100000	1	1	0.912737	84.478	80.593	89.793
P06744	383	P06744	P06744	Glucose-6-phosphate isomerase	GPI	GTRVDHQTGPIVWGEPGTNGQHAFYQLIHQG	835	P	6	1438		GTRVDHQTGP	I	V	W	G	E	P	G	T	N	G	Q	HAFYQLIHQG	1	1.02e-07	84.478	84.478	41.218	-0.26279	2100500000	1	1	NaN	84.478	58.522	NaN
P06744	120	P06744	P06744	Glucose-6-phosphate isomerase	GPI	NRSNTPILVDGKDVMPEVNKVLDKMKSFCQR	836	P	3	1438		NRSNTPILVD	G	K	D	V	M	P	E	V	N	K	V	LDKMKSFCQR	0.99998	0.00843638	77.514	69.425	77.514	0.3719	1360400000	NaN	0.99998	NaN	NaN	77.514	NaN
P06746	151	P06746	P06746	DNA polymerase beta	POLB	QRIGLKYFGDFEKRIPREEMLQMQDIVLNEV	838	P	4	1439		QRIGLKYFGD	F	E	K	R	I	P	R	E	E	M	L	QMQDIVLNEV	1	0.0030647	64.265	50.373	64.265	0.17633	112240000	1	NaN	1	55.383	NaN	64.265
P06748	11	P06748	P06748	Nucleophosmin	NPM1	_____MEDSMDMDMSPLRPQNYLFGCELKAD	839	P	2	1440		_____MEDSM	D	M	D	M	S	P	L	R	P	Q	N	YLFGCELKAD	1	0.000342485	53.777	53.777	53.777	-0.52823	49783000	1	1	NaN	44.196	53.777	NaN
P06748	14	P06748	P06748	Nucleophosmin	NPM1	__MEDSMDMDMSPLRPQNYLFGCELKADKDY	840	P	2	1440		__MEDSMDMD	M	S	P	L	R	P	Q	N	Y	L	F	GCELKADKDY	1	1.08e-05	79.771	79.771	53.777	-0.52823	123800000	1	1	NaN	79.771	53.777	NaN
P06748	71	P06748	P06748	Nucleophosmin	NPM1	ELHIVEAEAMNYEGSPIKVTLATLKMSVQPT	841	P	4	1440		ELHIVEAEAM	N	Y	E	G	S	P	I	K	V	T	L	ATLKMSVQPT	1	1.29e-10	127.77	112.95	40.146	0.66754	45266000000	1	1	1	71.881	127.31	127.77
P06756	154	P06756	P06756	Integrin alpha-V;Integrin alpha-V heavy chain;Integrin alpha-V light chain	ITGAV	APLYHWRTEMKQEREPVGTCFLQDGTKTVEY	842	P	4	1442		APLYHWRTEM	K	Q	E	R	E	P	V	G	T	C	F	LQDGTKTVEY	1	5.24e-09	121.74	100.14	121.74	-0.99146	41461000	NaN	1	NaN	NaN	121.74	NaN
P06865	397	P06865	P06865	Beta-hexosaminidase subunit alpha	HEXA	KIQPDTIIQVWREDIPVNYMKELELVTKAGF	843	P	4	1443		KIQPDTIIQV	W	R	E	D	I	P	V	N	Y	M	K	ELELVTKAGF	0.990352	0.00966217	47.73	38.186	47.73	0.35821	145400000	NaN	NaN	0.990352	NaN	NaN	47.73
P07108	20	P07108	P07108	Acyl-CoA-binding protein	DBI	EFEKAAEEVRHLKTKPSDEEMLFIYGHYKQA	845	P	3	1447		EFEKAAEEVR	H	L	K	T	K	P	S	D	E	E	M	LFIYGHYKQA	1	0.00325185	91.207	87.303	71.692	1.1146	9161700000	1	1	1	79.022	89.541	91.207
P07195	293	P07195	P07195	L-lactate dehydrogenase B chain	LDHB	VKGMYGIENEVFLSLPCILNARGLTSVINQK	846	P	2	1448		VKGMYGIENE	V	F	L	S	L	P	C	I	L	N	A	RGLTSVINQK	1	0.000447122	89.43	77.285	60.49	1.0353	46724000	1	1	NaN	60.49	89.43	NaN
P07195	76	P07195	P07195	L-lactate dehydrogenase B chain	LDHB	GEMMDLQHGSLFLQTPKIVADKDYSVTANSK	847	P	4	1448		GEMMDLQHGS	L	F	L	Q	T	P	K	I	V	A	D	KDYSVTANSK	1	3.93e-07	74.769	68.009	74.769	2.543	489590000	1	1	1	56.164	74.144	74.769
P07196	252	P07196	P07196	Neurofilament light polypeptide	NEFL	QIQYAQISVEMDVTKPDLSAALKDIRAQYEK	848	P	5	1449		QIQYAQISVE	M	D	V	T	K	P	D	L	S	A	A	LKDIRAQYEK	1	2.43e-07	106.49	96.824	59.954	-0.8069	258250000	1	1	1	62.105	106.49	48.449
P07196	66	P07196	P07196	Neurofilament light polypeptide	NEFL	LSVRRSYSSSSGSLMPSLENLDLSQVAAISN	849	P	3	1449		LSVRRSYSSS	S	G	S	L	M	P	S	L	E	N	L	DLSQVAAISN	1	4.52e-05	91.371	81.583	43.992	-1.1514	310160000	1	1	1	50.499	91.371	79.027
P07237	361	P07237	P07237	Protein disulfide-isomerase	P4HB	FLEGKIKPHLMSQELPEDWDKQPVKVLVGKN	851	P	4	1455		FLEGKIKPHL	M	S	Q	E	L	P	E	D	W	D	K	QPVKVLVGKN	0.999998	0.0158548	64.723	57.929	62.617	-0.13569	949750000	NaN	0.999998	NaN	NaN	64.723	NaN
P07237	368	P07237	P07237	Protein disulfide-isomerase	P4HB	PHLMSQELPEDWDKQPVKVLVGKNFEDVAFD	852	P	4	1455		PHLMSQELPE	D	W	D	K	Q	P	V	K	V	L	V	GKNFEDVAFD	0.999965	0.0158548	64.723	57.929	62.617	-0.13569	949750000	NaN	0.999965	NaN	NaN	64.723	NaN
P07237	313	P07237	P07237	Protein disulfide-isomerase	P4HB	NQRILEFFGLKKEECPAVRLITLEEEMTKYK	853	P	4	1455		NQRILEFFGL	K	K	E	E	C	P	A	V	R	L	I	TLEEEMTKYK	1	0.0297974	54.44	44.703	53.981	-0.23134	96331000	NaN	1	NaN	NaN	54.44	NaN
P07237	395	P07237	P07237	Protein disulfide-isomerase	P4HB	VAFDEKKNVFVEFYAPWCGHCKQLAPIWDKL	854	P	2	1455		VAFDEKKNVF	V	E	F	Y	A	P	W	C	G	H	C	KQLAPIWDKL	1	1.4e-07	172.92	164.82	158.41	-0.60841	2844900000	1	1	1	172.92	164.04	158.41
P07237	51	P07237	P07237	Protein disulfide-isomerase	P4HB	EALAAHKYLLVEFYAPWCGHCKALAPEYAKA	855	P	2	1455		EALAAHKYLL	V	E	F	Y	A	P	W	C	G	H	C	KALAPEYAKA	1	0.0136264	88.681	80.082	88.681	-1.8906	18712000	1	1	NaN	88.681	49.662	NaN
P07339	328	P07339	P07339	Cathepsin D;Cathepsin D light chain;Cathepsin D heavy chain	CTSD	KAIGAVPLIQGEYMIPCEKVSTLPAITLKLG	856	P	3	1458		KAIGAVPLIQ	G	E	Y	M	I	P	C	E	K	V	S	TLPAITLKLG	0.99699	0.0347395	48.883	44.266	48.883	-0.99735	416560000	NaN	0.99699	NaN	NaN	48.883	NaN
P07437	305	P07437	P07437	Tubulin beta chain	TUBB	TQQVFDAKNMMAACDPRHGRYLTVAAVFRGR	858	P	2	1461		TQQVFDAKNM	M	A	A	C	D	P	R	H	G	R	Y	LTVAAVFRGR	1	0.004679	67.032	65.188	67.032	0.02122	5985400000	1	0.999365	0.998202	67.032	55.228	41.904
P07437;P68371	160;160	P07437;P68371	P68371	Tubulin beta chain;Tubulin beta-4B chain	TUBB;TUBB4B	SGMGTLLISKIREEYPDRIMNTFSVVPSPKV	859	P	4	1461;3076		SGMGTLLISK	I	R	E	E	Y	P	D	R	I	M	N	TFSVVPSPKV	1	1.83e-05	100.92	9.9463	99.508	-0.3411	4576100000	1	1	1	93.684	99.508	100.92
P07741	93	P07741	P07741	Adenine phosphoribosyltransferase	APRT	ELGLGCVLIRKRGKLPGPTLWASYSLEYGKA	860	P	2	1467		ELGLGCVLIR	K	R	G	K	L	P	G	P	T	L	W	ASYSLEYGKA	1	4.52e-05	117.79	87.461	117.79	2.6743	652530000	1	1	1	91.086	79.492	117.79
P07741	95	P07741	P07741	Adenine phosphoribosyltransferase	APRT	GLGCVLIRKRGKLPGPTLWASYSLEYGKAEL	861	P	2	1467		GLGCVLIRKR	G	K	L	P	G	P	T	L	W	A	S	YSLEYGKAEL	1	4.52e-05	117.79	87.461	117.79	2.6743	652530000	1	1	1	91.086	79.492	117.79
P07814	736	P07814	P07814	Bifunctional glutamate/proline--tRNA ligase;Glutamate--tRNA ligase;Proline--tRNA ligase	EPRS	VEATKNETSAPFKERPTPSLNNNCTTSEDSL	863	P	3	1468		VEATKNETSA	P	F	K	E	R	P	T	P	S	L	N	NNCTTSEDSL	0.547263	0.0122753	61.222	57.732	61.222	-1.432	142280000	0.537866	0.547263	0	51.834	61.222	NaN
P07814	738	P07814	P07814	Bifunctional glutamate/proline--tRNA ligase;Glutamate--tRNA ligase;Proline--tRNA ligase	EPRS	ATKNETSAPFKERPTPSLNNNCTTSEDSLVL	864	P	3	1468		ATKNETSAPF	K	E	R	P	T	P	S	L	N	N	N	CTTSEDSLVL	0.941181	0.00373298	69.922	66.792	57.826	0.98539	185050000	0.941181	0.847322	0.941181	69.922	61.222	69.922
P07814	453	P07814	P07814	Bifunctional glutamate/proline--tRNA ligase;Glutamate--tRNA ligase;Proline--tRNA ligase	EPRS	LTWFVNEGLVDGWDDPRFPTVRGVLRRGMTV	865	P	3	1468		LTWFVNEGLV	D	G	W	D	D	P	R	F	P	T	V	RGVLRRGMTV	1	0.0129908	56.298	49.865	45.413	2.8763	219660000	1	1	NaN	54.223	56.298	NaN
P07814	456	P07814	P07814	Bifunctional glutamate/proline--tRNA ligase;Glutamate--tRNA ligase;Proline--tRNA ligase	EPRS	FVNEGLVDGWDDPRFPTVRGVLRRGMTVEGL	866	P	3	1468		FVNEGLVDGW	D	D	P	R	F	P	T	V	R	G	V	LRRGMTVEGL	1	0.0129908	56.298	49.865	45.413	2.8763	219660000	1	1	NaN	54.223	56.298	NaN
P07814	543	P07814	P07814	Bifunctional glutamate/proline--tRNA ligase;Glutamate--tRNA ligase;Proline--tRNA ligase	EPRS	KEVAKHPKNPEVGLKPVWYSPKVFIEGADAE	867	P	2	1468		KEVAKHPKNP	E	V	G	L	K	P	V	W	Y	S	P	KVFIEGADAE	1	2.29e-18	203.83	176.06	191.53	-0.43118	304080000	1	1	NaN	167.18	203.83	NaN
P07814	548	P07814	P07814	Bifunctional glutamate/proline--tRNA ligase;Glutamate--tRNA ligase;Proline--tRNA ligase	EPRS	HPKNPEVGLKPVWYSPKVFIEGADAETFSEG	868	P	2	1468		HPKNPEVGLK	P	V	W	Y	S	P	K	V	F	I	E	GADAETFSEG	1	2.29e-18	203.83	176.06	203.83	-0.030834	282800000	1	1	NaN	167.18	203.83	NaN
P07814	1115	P07814	P07814	Bifunctional glutamate/proline--tRNA ligase;Glutamate--tRNA ligase;Proline--tRNA ligase	EPRS	EVAWVTRSGKTELAEPIAIRPTSETVMYPAY	869	P	3	1468		EVAWVTRSGK	T	E	L	A	E	P	I	A	I	R	P	TSETVMYPAY	0.52141	0.00930625	62.19	42.812	62.19	0.2972	53491000	0.493777	0.52141	0	54.223	62.19	NaN
P07814	1120	P07814	P07814	Bifunctional glutamate/proline--tRNA ligase;Glutamate--tRNA ligase;Proline--tRNA ligase	EPRS	TRSGKTELAEPIAIRPTSETVMYPAYAKWVQ	870	P	3	1468		TRSGKTELAE	P	I	A	I	R	P	T	S	E	T	V	MYPAYAKWVQ	0.964873	2.31e-18	152.35	141.04	68.49	1.4154	6643300000	0.874899	0.914864	0.964873	103.63	152.35	69.779
P07814	1128	P07814	P07814	Bifunctional glutamate/proline--tRNA ligase;Glutamate--tRNA ligase;Proline--tRNA ligase	EPRS	AEPIAIRPTSETVMYPAYAKWVQSHRDLPIK	871	P	4	1468		AEPIAIRPTS	E	T	V	M	Y	P	A	Y	A	K	W	VQSHRDLPIK	0.999624	9.22e-05	102.97	91.868	84.318	-0.25414	3444900000	0.999624	0.996981	0.997205	84.318	73.676	102.97
P07900;P08238;Q58FF7	395;387;329	P07900;P08238	P08238	Heat shock protein HSP 90-alpha;Heat shock protein HSP 90-beta;Putative heat shock protein HSP 90-beta-3	HSP90AA1;HSP90AB1;HSP90AB3P	EYLNFIRGVVDSEDLPLNISREMLQQSKILK	872	P	2	1471;1492		EYLNFIRGVV	D	S	E	D	L	P	L	N	I	S	R	EMLQQSKILK	1	1.85e-05	109.15	99.609	109.15	0.22743	31854000	1	1	NaN	109.15	106.32	NaN
P07900	524	P07900	P07900	Heat shock protein HSP 90-alpha	HSP90AA1	ERLRKHGLEVIYMIEPIDEYCVQQLKEFEGK	873	P	3	1471		ERLRKHGLEV	I	Y	M	I	E	P	I	D	E	Y	C	VQQLKEFEGK	1	0.0012879	78.717	66.281	78.717	1.0024	381890000	1	1	1	61.957	44.089	78.717
P07900	717	P07900	P07900	Heat shock protein HSP 90-alpha	HSP90AA1	DPTADDTSAAVTEEMPPLEGDDDTSRMEEVD	874	P	4	1471		DPTADDTSAA	V	T	E	E	M	P	P	L	E	G	D	DDTSRMEEVD	0.548569	4.21e-10	64.273	59.956	64.273	1.6486	1058300000	0.548569	0.535929	0.499994	64.273	60.876	51.607
P07900	596	P07900	P07900	Heat shock protein HSP 90-alpha	HSP90AA1	KKVEKVVVSNRLVTSPCCIVTSTYGWTANME	876	P	3	1471		KKVEKVVVSN	R	L	V	T	S	P	C	C	I	V	T	STYGWTANME	1	2.38e-05	92.265	86.06	50.956	-2.0494	32626000	1	1	NaN	50.956	92.265	NaN
P07900	301	P07900	P07900	Heat shock protein HSP 90-alpha	HSP90AA1	DQEELNKTKPIWTRNPDDITNEEYGEFYKSL	877	P	4	1471		DQEELNKTKP	I	W	T	R	N	P	D	D	I	T	N	EEYGEFYKSL	1	4.3e-08	119.79	106.6	60.032	0.91023	6151000000	1	1	1	112.54	119.79	95.48
P07900;Q14568	295;294	P07900	P07900	Heat shock protein HSP 90-alpha;Heat shock protein HSP 90-alpha A2	HSP90AA1;HSP90AA2P	IKEKYIDQEELNKTKPIWTRNPDDITNEEYG	878	P	4	1471		IKEKYIDQEE	L	N	K	T	K	P	I	W	T	R	N	PDDITNEEYG	1	4.3e-08	150.57	129.92	71.354	0.26197	8671000000	1	1	1	115.5	140.74	150.57
P07900	379	P07900	P07900	Heat shock protein HSP 90-alpha	HSP90AA1	YVRRVFIMDNCEELIPEYLNFIRGVVDSEDL	879	P	3	1471		YVRRVFIMDN	C	E	E	L	I	P	E	Y	L	N	F	IRGVVDSEDL	1	0.00888715	51.487	45.604	51.487	-0.21549	535620000	1	1	1	45.916	44.089	51.487
P07910	112	P07910	P07910	Heterogeneous nuclear ribonucleoproteins C1/C2	HNRNPC	VKRSAAEMYGSVTEHPSPSPLLSSSFDLDYD	880	P	5	1473		VKRSAAEMYG	S	V	T	E	H	P	S	P	S	P	L	LSSSFDLDYD	0.85697	2.74e-06	54.326	52.955	54.326	-0.33342	12874000	NaN	NaN	0.85697	NaN	NaN	54.326
P07947	314	P07947	P07947	Tyrosine-protein kinase Yes	YES1	TTKVAIKTLKPGTMMPEAFLQEAQIMKKLRH	882	P	3	1476		TTKVAIKTLK	P	G	T	M	M	P	E	A	F	L	Q	EAQIMKKLRH	0.55928	0.000782295	65.25	65.25	65.25	-1.1195	37416000	0.55928	NaN	NaN	65.25	NaN	NaN
P07954	363	P07954	P07954	Fumarate hydratase, mitochondrial	FH	GPRSGLGELILPENEPGSSIMPGKVNPTQCE	884	P	2	1478		GPRSGLGELI	L	P	E	N	E	P	G	S	S	I	M	PGKVNPTQCE	0.976035	5.78e-14	151.74	124.77	112.51	-0.29034	1509100000	0.976035	0.961801	0.936843	151.74	151.44	119.01
P08069	989	P08069	P08069	Insulin-like growth factor 1 receptor;Insulin-like growth factor 1 receptor alpha chain;Insulin-like growth factor 1 receptor beta chain	IGF1R	ASVNPEYFSAADVYVPDEWEVAREKITMSRE	886	P	3	1482		ASVNPEYFSA	A	D	V	Y	V	P	D	E	W	E	V	AREKITMSRE	0.996377	0.0113244	50.493	44.891	50.493	-3.5027	0	NaN	NaN	0.996377	NaN	NaN	50.493
P08134;P61586	108;108	P08134;P61586	P61586	Rho-related GTP-binding protein RhoC;Transforming protein RhoA	RHOC;RHOA	ENIPEKWTPEVKHFCPNVPIILVGNKKDLRN;ENIPEKWTPEVKHFCPNVPIILVGNKKDLRQ	888	P	4	1484;2944		ENIPEKWTPE	V	K	H	F	C	P	N	V	P	I	I	LVGNKKDLRN	0.999406	0.00228755	73.877	67.714	73.877	-0.038971	518480000	0.999024	0.999406	0.998142	73.037	73.877	51.726
P08183	517	P08183	P08183	Multidrug resistance protein 1	ABCB1	KAVKEANAYDFIMKLPHKFDTLVGERGAQLS	889	P	4	1487		KAVKEANAYD	F	I	M	K	L	P	H	K	F	D	T	LVGERGAQLS	1	0.000443725	68.762	56.328	68.762	1.5374	21448000	NaN	1	NaN	NaN	68.762	NaN
P08237	411	P08237	P08237	ATP-dependent 6-phosphofructokinase, muscle type	PFKM	SKSGSHTVAVMNVGAPAAGMNAAVRSTVRIG	890	P	3	1491		SKSGSHTVAV	M	N	V	G	A	P	A	A	G	M	N	AAVRSTVRIG	1	7.49e-32	196.33	175.38	53.553	-0.43959	197570000	1	1	1	117.08	196.33	146.59
P08238;Q58FF7	516;389	P08238	P08238	Heat shock protein HSP 90-beta;Putative heat shock protein HSP 90-beta-3	HSP90AB1;HSP90AB3P	ERVRKRGFEVVYMTEPIDEYCVQQLKEFDGK	891	P	3	1492		ERVRKRGFEV	V	Y	M	T	E	P	I	D	E	Y	C	VQQLKEFDGK	1	0.000465616	73.036	15.458	42.123	0.87429	1527100000	1	1	1	72.227	73.036	57.147
P08238	630	P08238	P08238	Heat shock protein HSP 90-beta	HSP90AB1	STMGYMMAKKHLEINPDHPIVETLRQKAEAD	892	P	3	1492		STMGYMMAKK	H	L	E	I	N	P	D	H	P	I	V	ETLRQKAEAD	1	1.12e-13	186.76	146.04	56.817	-1.9269	3811700000	1	1	1	113.35	186.76	81.632
P08238	633	P08238	P08238	Heat shock protein HSP 90-beta	HSP90AB1	GYMMAKKHLEINPDHPIVETLRQKAEADKND	893	P	3	1492		GYMMAKKHLE	I	N	P	D	H	P	I	V	E	T	L	RQKAEADKND	1	1.12e-13	186.76	146.04	56.817	-1.9269	3830400000	1	1	1	113.35	186.76	81.632
P08238	588	P08238	P08238	Heat shock protein HSP 90-beta	HSP90AB1	KKVEKVTISNRLVSSPCCIVTSTYGWTANME	896	P	3	1492		KKVEKVTISN	R	L	V	S	S	P	C	C	I	V	T	STYGWTANME	1	5.66e-09	112.72	101.25	71.535	-0.47981	2008300000	1	1	1	65.092	112.72	91.441
P08238	287	P08238	P08238	Heat shock protein HSP 90-beta	HSP90AB1	IKEKYIDQEELNKTKPIWTRNPDDITQEEYG	897	P	4	1492		IKEKYIDQEE	L	N	K	T	K	P	I	W	T	R	N	PDDITQEEYG	1	1.6e-09	150.57	129.92	71.354	0.26197	13295000000	1	1	1	124.31	140.74	150.57
P08238	293	P08238	P08238	Heat shock protein HSP 90-beta	HSP90AB1	DQEELNKTKPIWTRNPDDITQEEYGEFYKSL	898	P	4	1492		DQEELNKTKP	I	W	T	R	N	P	D	D	I	T	Q	EEYGEFYKSL	1	1.6e-09	124.31	113.89	59.339	-0.3268	9991900000	1	1	1	124.31	111.81	105.32
P08238	371	P08238	P08238	Heat shock protein HSP 90-beta	HSP90AB1	YVRRVFIMDSCDELIPEYLNFIRGVVDSEDL	899	P	2	1492		YVRRVFIMDS	C	D	E	L	I	P	E	Y	L	N	F	IRGVVDSEDL	1	0.00100753	75.819	62.683	75.819	2.2122	166970000	1	1	NaN	44.587	75.819	NaN
P08397	208	P08397	P08397	Porphobilinogen deaminase	HMBS	LQRMGWHNRVGQILHPEECMYAVGQGALGVE	903	P	3	1496		LQRMGWHNRV	G	Q	I	L	H	P	E	E	C	M	Y	AVGQGALGVE	1	1.64e-06	111.67	110.49	111.67	-0.015794	128880000	1	NaN	NaN	111.67	NaN	NaN
P08572	976	P08572	P08572	Collagen alpha-2(IV) chain;Canstatin	COL4A2	AGEPGFKGSRGDPGPPGPPPVILPGMKDIKG	904	P	2	1498		AGEPGFKGSR	G	D	P	G	P	P	G	P	P	P	V	ILPGMKDIKG	0.988455	0.000290679	117.09	75.407	100.55	1.1548	50687000	0.988455	0.974323	NaN	100.55	117.09	NaN
P08572	1369	P08572	P08572	Collagen alpha-2(IV) chain;Canstatin	COL4A2	FMGNTGPTGAVGDRGPKGPKGDPGFPGAPGT	906	P	3	1498		FMGNTGPTGA	V	G	D	R	G	P	K	G	P	K	G	DPGFPGAPGT	0.999994	1.49e-07	106.86	102.34	87.772	-0.36181	166090000	0.999994	0.999686	0.999994	106.86	64.87	103.26
P08572	63	P08572	P08572	Collagen alpha-2(IV) chain;Canstatin	COL4A2	SGGCQCYPEKGGRGQPGPVGPQGYNGPPGLQ	926	P	3	1498		SGGCQCYPEK	G	G	R	G	Q	P	G	P	V	G	P	QGYNGPPGLQ	0.528723	0.000389473	70.994	57.936	56.453	1.0411	14721000	0.468454	NaN	0.528723	56.625	NaN	70.994
P08572	120	P08572	P08572	Collagen alpha-2(IV) chain;Canstatin	COL4A2	VGARGVSGFPGADGIPGHPGQGGPRGRPGYD	932	P	2	1498		VGARGVSGFP	G	A	D	G	I	P	G	H	P	G	Q	GGPRGRPGYD	0.999938	8.81e-06	89.507	76.946	89.507	0.1031	615630000	0.999938	0.970839	0.99967	89.507	67.251	86.539
P08572	123	P08572	P08572	Collagen alpha-2(IV) chain;Canstatin	COL4A2	RGVSGFPGADGIPGHPGQGGPRGRPGYDGCN	933	P	2	1498		RGVSGFPGAD	G	I	P	G	H	P	G	Q	G	G	P	RGRPGYDGCN	0.998667	8.81e-06	89.507	76.946	59.227	4.4847	342730000	0.984376	0.52273	0.998667	89.507	41.397	74.325
P08572	1412	P08572	P08572	Collagen alpha-2(IV) chain;Canstatin	COL4A2	IAVQPGTVGPQGRRGPPGAPGEMGPQGPPGE	935	P	3	1498		IAVQPGTVGP	Q	G	R	R	G	P	P	G	A	P	G	EMGPQGPPGE	0.664127	2.25e-09	109.44	85.645	43.841	1.4508	156080000	0.664127	NaN	0.539587	109.44	NaN	87.772
P08572	1413	P08572	P08572	Collagen alpha-2(IV) chain;Canstatin	COL4A2	AVQPGTVGPQGRRGPPGAPGEMGPQGPPGEP	936	P	3	1498		AVQPGTVGPQ	G	R	R	G	P	P	G	A	P	G	E	MGPQGPPGEP	0.664127	2.25e-09	109.44	85.645	43.841	1.4508	156080000	0.664127	NaN	0.539587	109.44	NaN	87.772
P08574	158	P08574	P08574	Cytochrome c1, heme protein, mitochondrial	CYC1	DEAKELAAEVEVQDGPNEDGEMFMRPGKLFD	940	P	3	1499		DEAKELAAEV	E	V	Q	D	G	P	N	E	D	G	E	MFMRPGKLFD	1	1.91e-05	99.407	99.407	87.319	-0.53361	840560000	0.933335	0	1	57.826	NaN	99.407
P08574	168	P08574	P08574	Cytochrome c1, heme protein, mitochondrial	CYC1	EVQDGPNEDGEMFMRPGKLFDYFPKPYPNSE	941	P	3	1499		EVQDGPNEDG	E	M	F	M	R	P	G	K	L	F	D	YFPKPYPNSE	1	7.43e-05	87.319	87.319	87.319	-0.53361	827270000	0.842558	0.958733	1	54.117	54.672	87.319
P08574	221	P08574	P08574	Cytochrome c1, heme protein, mitochondrial	CYC1	GGEDYVFSLLTGYCEPPTGVSLREGLYFNPY	942	P	3	1499		GGEDYVFSLL	T	G	Y	C	E	P	P	T	G	V	S	LREGLYFNPY	0.943792	0.00335068	56.29	48.125	44.953	-0.62129	26789000	0.943792	NaN	NaN	56.29	NaN	NaN
P08579	5	P08579	P08579	U2 small nuclear ribonucleoprotein B''	SNRPB2	___________MDIRPNHTIYINNMNDKIKK	943	P	4	1500		__________	_	M	D	I	R	P	N	H	T	I	Y	INNMNDKIKK	1	4.27e-09	140.95	133.66	110.77	-0.11648	5813600000	1	1	1	140.95	120.92	120.31
P08621	91	P08621	P08621	U1 small nuclear ribonucleoprotein 70 kDa	SNRNP70	ERRQQEVETELKMWDPHNDPNAQGDAFKTLF	946	P	5	1503		ERRQQEVETE	L	K	M	W	D	P	H	N	D	P	N	AQGDAFKTLF	1	0.0148237	54.152	48.551	54.152	0.58995	180860000	1	NaN	NaN	54.152	NaN	NaN
P08621	95	P08621	P08621	U1 small nuclear ribonucleoprotein 70 kDa	SNRNP70	QEVETELKMWDPHNDPNAQGDAFKTLFVARV	947	P	5	1503		QEVETELKMW	D	P	H	N	D	P	N	A	Q	G	D	AFKTLFVARV	1	0.0266872	54.152	48.551	54.152	0.58995	162380000	1	NaN	NaN	54.152	NaN	NaN
P08708	122	P08708	P08708	40S ribosomal protein S17	RPS17	KLLDFGSLSNLQVTQPTVGMNFKTPRGPV__	949	P	3	1507		KLLDFGSLSN	L	Q	V	T	Q	P	T	V	G	M	N	FKTPRGPV__	1	1.55e-07	102.39	88.536	102.39	2.2835	55943000	1	NaN	NaN	102.39	NaN	NaN
P08842	428	P08842	P08842	Steryl-sulfatase	STS	APLPEDRIIDGRDLMPLLEGKSQRSDHEFLF	950	P	4	1511		APLPEDRIID	G	R	D	L	M	P	L	L	E	G	K	SQRSDHEFLF	0.913396	0.00960898	50.215	38.429	50.215	0.1871	133280000	0.913396	NaN	NaN	50.215	NaN	NaN
P08865;A0A8I5KQE6	194;194	P08865	P08865	40S ribosomal protein SA	RPSA	AREVLRMRGTISREHPWEVMPDLYFYRDPEE	951	P	4	1512		AREVLRMRGT	I	S	R	E	H	P	W	E	V	M	P	DLYFYRDPEE	0.999998	1.57e-12	139.93	133.85	139.93	-0.4864	3000900000	0.999902	0.999998	0.997861	73.107	139.93	54.311
P08865;A0A8I5KQE6	199;199	P08865	P08865	40S ribosomal protein SA	RPSA	RMRGTISREHPWEVMPDLYFYRDPEEIEKEE	952	P	4	1512		RMRGTISREH	P	W	E	V	M	P	D	L	Y	F	Y	RDPEEIEKEE	0.999997	1.57e-12	139.93	133.85	139.93	-0.4864	2947100000	0.999902	0.999997	0.997861	73.107	139.93	54.311
P08865;A0A8I5KQE6	143;143	P08865	P08865	40S ribosomal protein SA	RPSA	RADHQPLTEASYVNLPTIALCNTDSPLRYVD	953	P	4	1512		RADHQPLTEA	S	Y	V	N	L	P	T	I	A	L	C	NTDSPLRYVD	0.999781	5.09e-09	87.25	81.733	87.25	-1.263	181440000	0.999781	0.999543	0.998211	87.25	77.733	57.076
P09001	84	P09001	P09001	39S ribosomal protein L3, mitochondrial	MRPL3	DKAQLASKLCPLKDEPWPIHPWEPGSFRVGL	954	P	4	1515		DKAQLASKLC	P	L	K	D	E	P	W	P	I	H	P	WEPGSFRVGL	0.995909	0.0162303	73.783	66.265	73.21	1.0463	41363000	NaN	0.995909	NaN	NaN	73.783	NaN
P09001	86	P09001	P09001	39S ribosomal protein L3, mitochondrial	MRPL3	AQLASKLCPLKDEPWPIHPWEPGSFRVGLIA	955	P	4	1515		AQLASKLCPL	K	D	E	P	W	P	I	H	P	W	E	PGSFRVGLIA	0.995445	0.0162303	73.783	66.265	73.21	1.0463	41363000	NaN	0.995445	NaN	NaN	73.783	NaN
P09104	18	P09104	P09104	Gamma-enolase	ENO2	IEKIWAREILDSRGNPTVEVDLYTAKGLFRA	960	P	2	1520		IEKIWAREIL	D	S	R	G	N	P	T	V	E	V	D	LYTAKGLFRA	1	5.77e-05	104.17	88.227	87.18	-3.4631	0	1	1	1	68.034	87.18	104.17
P09110	250	P09110	P09110	3-ketoacyl-CoA thiolase, peroxisomal	ACAA1	GTKRSITVTQDEGIRPSTTMEGLAKLKPAFK	961	P	3	1521		GTKRSITVTQ	D	E	G	I	R	P	S	T	T	M	E	GLAKLKPAFK	1	2.22e-12	147.16	102.58	84.919	0.44264	1260600000	1	1	1	104.84	147.16	63.184
P09110	313	P09110	P09110	3-ketoacyl-CoA thiolase, peroxisomal	ACAA1	LPILGVLRSYAVVGVPPDIMGIGPAYAIPVA	962	P	3	1521		LPILGVLRSY	A	V	V	G	V	P	P	D	I	M	G	IGPAYAIPVA	0.537767	0.000873335	64.028	57.96	64.028	-0.15093	30750000	NaN	0.537767	NaN	NaN	64.028	NaN
P09211	2	P09211	P09211	Glutathione S-transferase P	GSTP1	______________MPPYTVVYFPVRGRCAA	963	P	2	1523		__________	_	_	_	_	M	P	P	Y	T	V	V	YFPVRGRCAA	0.998361	0.0322569	102.53	85.86	102.53	0.7414	43941000	0.998361	0.998265	NaN	102.53	101.32	NaN
P09543	311	P09543	P09543	2',3'-cyclic-nucleotide 3'-phosphodiesterase	CNP	TGARVELSEQQLQLWPSDVDKLSPTDNLPRG	964	P	2	1534		TGARVELSEQ	Q	L	Q	L	W	P	S	D	V	D	K	LSPTDNLPRG	0.997206	4.45e-22	150.39	124.24	84.874	-1.5317	148640000	0.849337	0.997206	0.989332	78.202	105.32	150.39
P09543	319	P09543	P09543	2',3'-cyclic-nucleotide 3'-phosphodiesterase	CNP	EQQLQLWPSDVDKLSPTDNLPRGSRAHITLG	965	P	3	1534		EQQLQLWPSD	V	D	K	L	S	P	T	D	N	L	P	RGSRAHITLG	0.948154	0.00041009	105.32	86.072	76.21	0.53507	148640000	0.948154	0.944603	NaN	78.202	105.32	NaN
P09622	458	P09622	P09622	Dihydrolipoyl dehydrogenase, mitochondrial	DLD	GQKSTDRVLGAHILGPGAGEMVNEAALALEY	968	P	3	1536		GQKSTDRVLG	A	H	I	L	G	P	G	A	G	E	M	VNEAALALEY	1	9.19e-22	150.95	144.29	83.557	0.12997	438480000	NaN	1	1	NaN	40.544	150.95
P09651	49	P09651	P09651	Heterogeneous nuclear ribonucleoprotein A1;Heterogeneous nuclear ribonucleoprotein A1, N-terminally processed	HNRNPA1	FEQWGTLTDCVVMRDPNTKRSRGFGFVTYAT	969	P	4	1539		FEQWGTLTDC	V	V	M	R	D	P	N	T	K	R	S	RGFGFVTYAT	1	0.00347541	51.834	39.28	51.834	-2.2904	129660000	NaN	NaN	1	NaN	NaN	51.834
P09874	389	P09874	P09874	Poly [ADP-ribose] polymerase 1	PARP1	ASAPAAVNSSASADKPLSNMKILTLGKLSRN	970	P	5	1544		ASAPAAVNSS	A	S	A	D	K	P	L	S	N	M	K	ILTLGKLSRN	0.999964	8.32e-11	85.864	81.887	84.369	1.0729	3502100000	0.999964	0.999739	0.999831	84.369	85.864	74.03
P09874	149	P09874	P09874	Poly [ADP-ribose] polymerase 1	PARP1	KGQVRLSKKMVDPEKPQLGMIDRWYHPGCFV	971	P	2	1544		KGQVRLSKKM	V	D	P	E	K	P	Q	L	G	M	I	DRWYHPGCFV	0.999662	0.00850024	77.305	77.305	77.305	-0.0011042	607890000	0.871535	0.995799	0.999662	44.105	49.515	77.305
P09874	160	P09874	P09874	Poly [ADP-ribose] polymerase 1	PARP1	DPEKPQLGMIDRWYHPGCFVKNREELGFRPE	973	P	4	1544		DPEKPQLGMI	D	R	W	Y	H	P	G	C	F	V	K	NREELGFRPE	0.978247	0.00203921	56.055	49.257	46.353	0.040844	36718000	NaN	0.978247	0.938825	NaN	46.353	56.055
P09874	915	P09874	P09874	Poly [ADP-ribose] polymerase 1	PARP1	MVSKSANYCHTSQGDPIGLILLGEVALGNMY	974	P	3	1544		MVSKSANYCH	T	S	Q	G	D	P	I	G	L	I	L	LGEVALGNMY	1	0.000870987	49.888	44.047	49.888	0.75051	12095000	1	NaN	NaN	49.888	NaN	NaN
P09874	480	P09874	P09874	Poly [ADP-ribose] polymerase 1	PARP1	STKSLQELFLAHILSPWGAEVKAEPVEVVAP	975	P	3	1544		STKSLQELFL	A	H	I	L	S	P	W	G	A	E	V	KAEPVEVVAP	1	2.58e-49	183.47	178.49	96.718	-0.52307	4931300000	0.999545	1	1	166.35	183.47	147.41
P09874	489	P09874	P09874	Poly [ADP-ribose] polymerase 1	PARP1	LAHILSPWGAEVKAEPVEVVAPRGKSGAALS	976	P	4	1544		LAHILSPWGA	E	V	K	A	E	P	V	E	V	V	A	PRGKSGAALS	0.999847	2.58e-49	183.47	178.49	140.71	0.53273	4703000000	0.999545	0.999571	0.999847	166.35	183.47	147.41
P09874	605	P09874	P09874	Poly [ADP-ribose] polymerase 1	PARP1	GRVGTVIGSNKLEQMPSKEDAIEHFMKLYEE	977	P	4	1544		GRVGTVIGSN	K	L	E	Q	M	P	S	K	E	D	A	IEHFMKLYEE	1	6.34e-06	108.07	96.106	51.234	-0.59754	3281000000	NaN	1	1	NaN	82.885	108.07
P09884	904	P09884	P09884	DNA polymerase alpha catalytic subunit	POLA1	VTEDGEQEQIPELPDPSLEMGILPREIRKLV	979	P	3	1545		VTEDGEQEQI	P	E	L	P	D	P	S	L	E	M	G	ILPREIRKLV	0.943747	0.000441377	82.157	74.491	82.157	2.7758	6921300	NaN	NaN	0.943747	NaN	NaN	82.157
P09960	598	P09960	P09960	Leukotriene A-4 hydrolase	LTA4H	DQAVRTYQEHKASMHPVTAMLVGKDLKVD__	982	P	3	1548		DQAVRTYQEH	K	A	S	M	H	P	V	T	A	M	L	VGKDLKVD__	1	0.00167558	82.765	63.73	60.938	0.18553	295730000	NaN	1	NaN	NaN	82.765	NaN
P09960	180	P09960	P09960	Leukotriene A-4 hydrolase	LTA4H	KELVALMSAIRDGETPDPEDPSRKIYKFIQK	983	P	3	1548		KELVALMSAI	R	D	G	E	T	P	D	P	E	D	P	SRKIYKFIQK	0.646786	1.89e-05	74.516	69.357	74.516	1.0699	109480000	0.541676	0.646786	NaN	62.858	74.516	NaN
P09960	13	P09960	P09960	Leukotriene A-4 hydrolase	LTA4H	___MPEIVDTCSLASPASVCRTKHLHLRCSV	984	P	2	1548		___MPEIVDT	C	S	L	A	S	P	A	S	V	C	R	TKHLHLRCSV	1	0.0202031	97.175	68.369	97.175	-0.39524	47140000	NaN	1	NaN	NaN	97.175	NaN
P09960	121	P09960	P09960	Leukotriene A-4 hydrolase	LTA4H	SFETSPKSSALQWLTPEQTSGKEHPYLFSQC	985	P	5	1548		SFETSPKSSA	L	Q	W	L	T	P	E	Q	T	S	G	KEHPYLFSQC	1	0.000561115	52.122	43.804	52.122	-1.2806	47223000	1	NaN	NaN	52.122	NaN	NaN
P09960	130	P09960	P09960	Leukotriene A-4 hydrolase	LTA4H	ALQWLTPEQTSGKEHPYLFSQCQAIHCRAIL	986	P	5	1548		ALQWLTPEQT	S	G	K	E	H	P	Y	L	F	S	Q	CQAIHCRAIL	1	0.000561115	52.122	43.804	52.122	-1.2806	47223000	1	NaN	NaN	52.122	NaN	NaN
Q99878;Q96KK5;P0C0S8;Q9BTM1;Q8IUE6;Q93077	49;49;49;49;49;49	Q99878;Q8IUE6;Q93077	Q99878	Histone H2A type 1-J;Histone H2A type 1-H;Histone H2A type 1;Histone H2A.J;Histone H2A type 2-B;Histone H2A type 1-C	HIST1H2AJ;HIST1H2AH;HIST1H2AG;H2AFJ;HIST2H2AB;HIST1H2AC	LLRKGNYAERVGAGAPVYLAAVLEYLTAEIL	987	P	3	1552;5423;6523		LLRKGNYAER	V	G	A	G	A	P	V	Y	L	A	A	VLEYLTAEIL	1	3.02e-59	196.27	9.337	45.862	4.3436	133100000	1	1	1	196.27	53.705	84.559
P0DJ07	43	P0DJ07	P0DJ07	Protein PET100 homolog, mitochondrial	PET100	EWFEDDVIQRKRELWPPEKLQEIEEFKERLR	988	P	4	1568		EWFEDDVIQR	K	R	E	L	W	P	P	E	K	L	Q	EIEEFKERLR	1	0.000481556	106.36	93.642	106.36	0.38853	220970000	1	1	NaN	77.13	106.36	NaN
P0DJ07	44	P0DJ07	P0DJ07	Protein PET100 homolog, mitochondrial	PET100	WFEDDVIQRKRELWPPEKLQEIEEFKERLRK	989	P	4	1568		WFEDDVIQRK	R	E	L	W	P	P	E	K	L	Q	E	IEEFKERLRK	1	0.000481556	106.36	93.642	106.36	0.38853	220970000	1	1	NaN	77.13	106.36	NaN
P0DMN0;P0DMM9;P50225	200;200;200	P0DMN0;P50225	P50225	Sulfotransferase 1A4;Sulfotransferase 1A3;Sulfotransferase 1A1	SULT1A4;SULT1A3;SULT1A1	THPVLYLFYEDMKENPKREIQKILEFVGRSL	990	P	4	1572;2577		THPVLYLFYE	D	M	K	E	N	P	K	R	E	I	Q	KILEFVGRSL	0.999999	0.00277433	65.107	60.49	65.107	2.0327	96091000	0.999999	NaN	NaN	65.107	NaN	NaN
P0DMV9;P0DMV8;P34931	116;116;118	P0DMV9;P34931	P0DMV9	Heat shock 70 kDa protein 1B;Heat shock 70 kDa protein 1A;Heat shock 70 kDa protein 1-like	HSPA1B;HSPA1A;HSPA1L	PKVLVSYKGENKAFYPEEISSMVLTKLKETA;PKVQVSYKGETKAFYPEEISSMVLTKMKEIA	991	P	2	1573;2210		PKVLVSYKGE	N	K	A	F	Y	P	E	E	I	S	S	MVLTKLKETA	1	0.00425019	91.313	74.146	68.44	-1.0136	405610000	1	1	1	91.313	68.44	65.179
P0DMV9;P0DMV8	138;138	P0DMV9	P0DMV9	Heat shock 70 kDa protein 1B;Heat shock 70 kDa protein 1A	HSPA1B;HSPA1A	VLTKMKEIAEAYLGYPVTNAVITVPAYFNDS	992	P	3	1573		VLTKMKEIAE	A	Y	L	G	Y	P	V	T	N	A	V	ITVPAYFNDS	0.982144	0.0102761	45.126	40.899	45.126	0.46404	3462100	0.982144	NaN	NaN	45.126	NaN	NaN
P0DMV9;P0DMV8	605;605	P0DMV9	P0DMV9	Heat shock 70 kDa protein 1B;Heat shock 70 kDa protein 1A	HSPA1B;HSPA1A	DEFEHKRKELEQVCNPIISGLYQGAGGPGPG	993	P	2	1573		DEFEHKRKEL	E	Q	V	C	N	P	I	I	S	G	L	YQGAGGPGPG	1	5.67e-12	141.6	136.39	141.6	0.14876	23645000000	1	0.999999	1	141.6	97.295	104.51
P0DMV9;P0DMV8	81;81	P0DMV9	P0DMV9	Heat shock 70 kDa protein 1B;Heat shock 70 kDa protein 1A	HSPA1B;HSPA1A	TVFDAKRLIGRKFGDPVVQSDMKHWPFQVIN	999	P	5	1573		TVFDAKRLIG	R	K	F	G	D	P	V	V	Q	S	D	MKHWPFQVIN	0.999991	0.000179866	85.573	68.232	64.152	-0.43954	29882000000	0.999931	0.999991	0.999886	62.677	85.573	61.602
P0DMV9;P0DMV8	91;91	P0DMV9	P0DMV9	Heat shock 70 kDa protein 1B;Heat shock 70 kDa protein 1A	HSPA1B;HSPA1A	RKFGDPVVQSDMKHWPFQVINDGDKPKVQVS	1000	P	3	1573		RKFGDPVVQS	D	M	K	H	W	P	F	Q	V	I	N	DGDKPKVQVS	1	1.93e-09	128.98	122.88	74.46	-0.23416	115340000000	1	1	1	125.78	128.98	122.75
P0DMV9;P0DMV8	101;101	P0DMV9	P0DMV9	Heat shock 70 kDa protein 1B;Heat shock 70 kDa protein 1A	HSPA1B;HSPA1A	DMKHWPFQVINDGDKPKVQVSYKGETKAFYP	1001	P	3	1573		DMKHWPFQVI	N	D	G	D	K	P	K	V	Q	V	S	YKGETKAFYP	0.999964	0.000153554	104.53	89.077	104.53	-0.016354	7074900000	0.999552	0.999964	0.996035	67.614	104.53	59.943
P0DMV9;P0DMV8	63;63	P0DMV9	P0DMV9	Heat shock 70 kDa protein 1B;Heat shock 70 kDa protein 1A	HSPA1B;HSPA1A	ERLIGDAAKNQVALNPQNTVFDAKRLIGRKF	1002	P	3	1573		ERLIGDAAKN	Q	V	A	L	N	P	Q	N	T	V	F	DAKRLIGRKF	1	0.0329547	46.319	28.618	46.319	0.1412	30842000	1	NaN	NaN	46.319	NaN	NaN
P0DMV9;P0DMV8;P34931	436;436;438	P0DMV9;P34931	P0DMV9	Heat shock 70 kDa protein 1B;Heat shock 70 kDa protein 1A;Heat shock 70 kDa protein 1-like	HSPA1B;HSPA1A;HSPA1L	PTKQTQIFTTYSDNQPGVLIQVYEGERAMTK	1003	P	4	1573;2210		PTKQTQIFTT	Y	S	D	N	Q	P	G	V	L	I	Q	VYEGERAMTK	0.999996	1.6e-05	62.302	57.901	62.302	0.95227	396670000	NaN	NaN	0.999996	NaN	NaN	62.302
P0DMV9;P0DMV8	398;398	P0DMV9	P0DMV9	Heat shock 70 kDa protein 1B;Heat shock 70 kDa protein 1A	HSPA1B;HSPA1A	DKSENVQDLLLLDVAPLSLGLETAGGVMTAL	1004	P	3	1573		DKSENVQDLL	L	L	D	V	A	P	L	S	L	G	L	ETAGGVMTAL	1	1.63e-05	68.96	66.766	43.921	1.8581	127160000	1	1	NaN	43.921	68.96	NaN
P0DMV9;P0DMV8;P34931	365;365;367	P0DMV9;P34931	P0DMV9	Heat shock 70 kDa protein 1B;Heat shock 70 kDa protein 1A;Heat shock 70 kDa protein 1-like	HSPA1B;HSPA1A;HSPA1L	LQDFFNGRDLNKSINPDEAVAYGAAVQAAIL;LQDYFNGRDLNKSINPDEAVAYGAAVQAAIL	1005	P	3	1573;2210		LQDFFNGRDL	N	K	S	I	N	P	D	E	A	V	A	YGAAVQAAIL	1	0.0128671	66.871	58.782	66.871	1.993	1554200	NaN	NaN	1	NaN	NaN	66.871
P0DMV9;P0DMV8;P11142;P34931;P54652	39;39;39;41;40	P0DMV9;P11142;P34931;P54652	P0DMV9	Heat shock 70 kDa protein 1B;Heat shock 70 kDa protein 1A;Heat shock cognate 71 kDa protein;Heat shock 70 kDa protein 1-like;Heat shock-related 70 kDa protein 2	HSPA1B;HSPA1A;HSPA8;HSPA1L;HSPA2	GKVEIIANDQGNRTTPSYVAFTDTERLIGDA	1006	P	3	1573;1619;2210;2773		GKVEIIANDQ	G	N	R	T	T	P	S	Y	V	A	F	TDTERLIGDA	1	0.0133326	67.43	55.784	64.203	-0.035506	346440000	1	1	1	67.312	67.43	64.203
P0DP25;P0DP24;P0DP23	44;44;44	P0DP25	P0DP25			TTKELGTVMRSLGQNPTEAELQDMINEVDAD	1007	P	3	1575		TTKELGTVMR	S	L	G	Q	N	P	T	E	A	E	L	QDMINEVDAD	1	6.47e-08	112.2	104.14	112.2	-0.34069	243490000	NaN	1	0.965694	NaN	112.2	59.436
P0DP25;P0DP24;P0DP23	67;67;67	P0DP25	P0DP25			MINEVDADGNGTIDFPEFLTMMARKMKDTDS	1008	P	3	1575		MINEVDADGN	G	T	I	D	F	P	E	F	L	T	M	MARKMKDTDS	0.999998	4.76e-09	115.18	110.65	115.18	-1.3347	526520000	NaN	0.999998	0.999974	NaN	115.18	50.253
P10155	10	P10155	P10155	60 kDa SS-A/Ro ribonucleoprotein	TROVE2	______MEESVNQMQPLNEKQIANSQDGYVW	1009	P	2	1588		______MEES	V	N	Q	M	Q	P	L	N	E	K	Q	IANSQDGYVW	1	0.0065517	50.452	40.222	50.452	3.6564	0	NaN	1	NaN	NaN	50.452	NaN
P10253	690	P10253	P10253	Lysosomal alpha-glucosidase;76 kDa lysosomal alpha-glucosidase;70 kDa lysosomal alpha-glucosidase	GAA	NSLLSLPQEPYSFSEPAQQAMRKALTLRYAL	1010	P	4	1591		NSLLSLPQEP	Y	S	F	S	E	P	A	Q	Q	A	M	RKALTLRYAL	0.999865	8.16e-46	202.13	186.01	85.573	0.19142	102790000	0.999615	0.985548	0.999865	202.13	134.21	142.85
P10398	194	P10398	P10398	Serine/threonine-protein kinase A-Raf	ARAF	LLTPQGPSPRTQHCDPEHFPFPAPANAPLQR	1013	P	4	1596		LLTPQGPSPR	T	Q	H	C	D	P	E	H	F	P	F	PAPANAPLQR	0.753553	0.0216063	42.172	39.665	42.172	0.82605	10057000	0.753553	NaN	NaN	42.172	NaN	NaN
P10586	821	P10586	P10586	Receptor-type tyrosine-protein phosphatase F	PTPRF	GARSKPKIVTTTGAVPGRPTMMISTTAMNTA	1018	P	5	1600		GARSKPKIVT	T	T	G	A	V	P	G	R	P	T	M	MISTTAMNTA	0.834028	1.13e-11	62.942	62.942	62.942	-2.3008	22163000	NaN	NaN	0.834028	NaN	NaN	62.942
P10586	141	P10586	P10586	Receptor-type tyrosine-protein phosphatase F	PTPRF	EEEQLPPGFPSIDMGPQLKVVEKARTATMLC	1020	P	2	1600		EEEQLPPGFP	S	I	D	M	G	P	Q	L	K	V	V	EKARTATMLC	0.998915	1.73e-06	110.55	99.074	110.55	0.75225	164820000	0.735532	0.998915	0.971357	79.346	110.55	94.461
P10586	1121	P10586	P10586	Receptor-type tyrosine-protein phosphatase F	PTPRF	PASAYIEDGRFDLSMPHVQDPSLVRWFYIVV	1021	P	5	1600		PASAYIEDGR	F	D	L	S	M	P	H	V	Q	D	P	SLVRWFYIVV	0.820981	3.47e-09	67.209	60.397	67.209	-0.76284	89983000	NaN	0.820981	0.764723	NaN	67.209	63.97
P10606	38	P10606	P10606	Cytochrome c oxidase subunit 5B, mitochondrial	COX5B	SGAAAMRSMASGGGVPTDEEQATGLEREIML	1023	P	3	1604		SGAAAMRSMA	S	G	G	G	V	P	T	D	E	E	Q	ATGLEREIML	1	0.00121532	60.943	48.63	54.744	-0.75585	93347000	1	NaN	1	54.744	NaN	60.943
P10619	464	P10619	P10619	Lysosomal protective protein;Lysosomal protective protein 32 kDa chain;Lysosomal protective protein 20 kDa chain	CTSA	FLTIKGAGHMVPTDKPLAAFTMFSRFLNKQP	1024	P	2	1605		FLTIKGAGHM	V	P	T	D	K	P	L	A	A	F	T	MFSRFLNKQP	0.995545	0.0232793	62.924	62.924	62.924	1.9682	0	NaN	0.995545	NaN	NaN	62.924	NaN
P10644	43	P10644	P10644	cAMP-dependent protein kinase type I-alpha regulatory subunit;cAMP-dependent protein kinase type I-alpha regulatory subunit, N-terminally processed	PRKAR1A	QALLKDSIVQLCTARPERPMAFLREYFERLE	1025	P	4	1608		QALLKDSIVQ	L	C	T	A	R	P	E	R	P	M	A	FLREYFERLE	0.988471	0.000911196	82.877	64.561	51.487	0.12584	180110000	0.70235	0.988471	0.955986	58.693	82.877	55.437
P10644	320	P10644	P10644	cAMP-dependent protein kinase type I-alpha regulatory subunit;cAMP-dependent protein kinase type I-alpha regulatory subunit, N-terminally processed	PRKAR1A	RRSENEEFVEVGRLGPSDYFGEIALLMNRPR	1026	P	4	1608		RRSENEEFVE	V	G	R	L	G	P	S	D	Y	F	G	EIALLMNRPR	0.518575	0.000195882	62.374	56.594	62.374	-1.5881	27385000	NaN	0.518575	0	NaN	62.374	NaN
P10644	334	P10644	P10644	cAMP-dependent protein kinase type I-alpha regulatory subunit;cAMP-dependent protein kinase type I-alpha regulatory subunit, N-terminally processed	PRKAR1A	GPSDYFGEIALLMNRPRAATVVARGPLKCVK	1027	P	4	1608		GPSDYFGEIA	L	L	M	N	R	P	R	A	A	T	V	VARGPLKCVK	0.983389	0.000289122	87.489	81.709	87.489	-0.74773	45099000	NaN	NaN	0.983389	NaN	NaN	87.489
P10809	57	P10809	P10809	60 kDa heat shock protein, mitochondrial	HSPD1	QGVDLLADAVAVTMGPKGRTVIIEQSWGSPK	1028	P	3	1612		QGVDLLADAV	A	V	T	M	G	P	K	G	R	T	V	IIEQSWGSPK	1	3.82e-15	153.24	141.44	51.539	1.811	459290000	1	1	1	153.24	103.14	106.14
P10809	550	P10809	P10809	60 kDa heat shock protein, mitochondrial	HSPD1	VASLLTTAEVVVTEIPKEEKDPGMGAMGGMG	1029	P	4	1612		VASLLTTAEV	V	V	T	E	I	P	K	E	E	K	D	PGMGAMGGMG	1	1.21e-17	107.98	107.98	88.149	0.67259	2450500000	0.822019	0.812228	1	103.94	107.98	95.603
P10809	71	P10809	P10809	60 kDa heat shock protein, mitochondrial	HSPD1	GPKGRTVIIEQSWGSPKVTKDGVTVAKSIDL	1031	P	2	1612		GPKGRTVIIE	Q	S	W	G	S	P	K	V	T	K	D	GVTVAKSIDL	1	3.74e-08	157.96	100.37	110.38	1.1073	1367000000	1	1	1	152.81	150.85	157.96
P11021	535	P11021	P11021	78 kDa glucose-regulated protein	HSPA5	NKNKITITNDQNRLTPEEIERMVNDAEKFAE	1032	P	4	1615		NKNKITITND	Q	N	R	L	T	P	E	E	I	E	R	MVNDAEKFAE	1	0.000921868	67.979	47.992	67.979	-0.021851	31298000	NaN	NaN	1	NaN	NaN	67.979
P11021	88	P11021	P11021	78 kDa glucose-regulated protein	HSPA5	ERLIGDAAKNQLTSNPENTVFDAKRLIGRTW	1033	P	3	1615		ERLIGDAAKN	Q	L	T	S	N	P	E	N	T	V	F	DAKRLIGRTW	1	0.00941299	53.328	35.822	53.328	-4.415	57334000	NaN	NaN	1	NaN	NaN	53.328
P11142	63	P11142	P11142	Heat shock cognate 71 kDa protein	HSPA8	ERLIGDAAKNQVAMNPTNTVFDAKRLIGRRF	1040	P	2	1619		ERLIGDAAKN	Q	V	A	M	N	P	T	N	T	V	F	DAKRLIGRRF	1	0.0208259	68.355	58.668	60.255	-0.46963	48583000	1	NaN	1	68.355	NaN	60.255
P11171	379	P11171	P11171	Protein 4.1	EPB41	EEKVMELHKSYRSMTPAQADLEFLENAKKLS	1042	P	3	1622		EEKVMELHKS	Y	R	S	M	T	P	A	Q	A	D	L	EFLENAKKLS	1	0.00127788	78.326	68.538	78.326	-0.2711	48562000	1	NaN	NaN	78.326	NaN	NaN
P11171	781	P11171	P11171	Protein 4.1	EPB41	TYEAAQTDDNSGDLDPGVLLTAQTITSETPS	1043	P	3	1622		TYEAAQTDDN	S	G	D	L	D	P	G	V	L	L	T	AQTITSETPS	0.973104	0.000126934	45.924	43.483	45.924	3.1062	4271000	0.973104	NaN	NaN	45.924	NaN	NaN
P11172	410	P11172	P11172	Uridine 5'-monophosphate synthase;Orotate phosphoribosyltransferase;Orotidine 5'-phosphate decarboxylase	UMPS	EFVVGFISGSRVSMKPEFLHLTPGVQLEAGG	1044	P	4	1623		EFVVGFISGS	R	V	S	M	K	P	E	F	L	H	L	TPGVQLEAGG	0.999967	3.13e-25	148.36	142.49	145.47	1.3401	2846500000	0.999967	0.998894	0.999948	148.36	125.42	139.16
P11172	417	P11172	P11172	Uridine 5'-monophosphate synthase;Orotate phosphoribosyltransferase;Orotidine 5'-phosphate decarboxylase	UMPS	SGSRVSMKPEFLHLTPGVQLEAGGDNLGQQY	1045	P	6	1623		SGSRVSMKPE	F	L	H	L	T	P	G	V	Q	L	E	AGGDNLGQQY	0.624919	2.17e-09	68.333	66.86	68.333	2.2745	50368000	0.624919	0	0	68.333	NaN	NaN
P11177	313	P11177	P11177	Pyruvate dehydrogenase E1 component subunit beta, mitochondrial	PDHB	QFGVGAEICARIMEGPAFNFLDAPAVRVTGA	1046	P	3	1624		QFGVGAEICA	R	I	M	E	G	P	A	F	N	F	L	DAPAVRVTGA	0.999999	0.0111204	60.209	49.87	60.209	0.11391	251330000	NaN	NaN	0.999999	NaN	NaN	60.209
P11216	343	P11216	P11216	Glycogen phosphorylase, brain form	PYGB	ETFPDKVAIQLNDTHPALSIPELMRILVDVE	1049	P	4	1626		ETFPDKVAIQ	L	N	D	T	H	P	A	L	S	I	P	ELMRILVDVE	0.635635	0.000110391	70.107	64.563	70.107	-0.57541	189170000	0.635635	NaN	NaN	70.107	NaN	NaN
P11274	107	P11274	P11274	Breakpoint cluster region protein	BCR	ASASRPQPAPADGADPPPAEEPEARPDGEGS	1051	P	4	1629		ASASRPQPAP	A	D	G	A	D	P	P	P	A	E	E	PEARPDGEGS	0.973933	0.000831404	46.31	42.825	46.31	-0.17426	37029000	0.973933	NaN	NaN	46.31	NaN	NaN
P11274	108	P11274	P11274	Breakpoint cluster region protein	BCR	SASRPQPAPADGADPPPAEEPEARPDGEGSP	1052	P	4	1629		SASRPQPAPA	D	G	A	D	P	P	P	A	E	E	P	EARPDGEGSP	0.973933	0.000831404	46.31	42.825	46.31	-0.17426	37029000	0.973933	NaN	NaN	46.31	NaN	NaN
P11274	109	P11274	P11274	Breakpoint cluster region protein	BCR	ASRPQPAPADGADPPPAEEPEARPDGEGSPG	1053	P	4	1629		ASRPQPAPAD	G	A	D	P	P	P	A	E	E	P	E	ARPDGEGSPG	0.973933	0.000831404	46.31	42.825	46.31	-0.17426	37029000	0.973933	NaN	NaN	46.31	NaN	NaN
P11274	113	P11274	P11274	Breakpoint cluster region protein	BCR	QPAPADGADPPPAEEPEARPDGEGSPGKARP	1054	P	4	1629		QPAPADGADP	P	P	A	E	E	P	E	A	R	P	D	GEGSPGKARP	0.882856	0.000831404	46.31	42.825	46.31	-0.17426	37029000	0.882856	NaN	NaN	46.31	NaN	NaN
P11274	117	P11274	P11274	Breakpoint cluster region protein	BCR	ADGADPPPAEEPEARPDGEGSPGKARPGTAR	1055	P	4	1629		ADGADPPPAE	E	P	E	A	R	P	D	G	E	G	S	PGKARPGTAR	0.882856	0.000831404	46.31	42.825	46.31	-0.17426	37029000	0.882856	NaN	NaN	46.31	NaN	NaN
P11388	562	P11388	P11388	DNA topoisomerase 2-alpha	TOP2A	SHIKGLLINFIHHNWPSLLRHRFLEEFITPI	1057	P	6	1635		SHIKGLLINF	I	H	H	N	W	P	S	L	L	R	H	RFLEEFITPI	1	3.42e-06	62.683	57.922	62.683	-0.95272	22527000	NaN	1	NaN	NaN	62.683	NaN
P11388	1163	P11388	P11388	DNA topoisomerase 2-alpha	TOP2A	RNEKEQELDTLKRKSPSDLWKEDLATFIEEL	1058	P	4	1635		RNEKEQELDT	L	K	R	K	S	P	S	D	L	W	K	EDLATFIEEL	1	1.57e-06	115.55	103.47	86.236	1.2416	54442000	1	1	NaN	115.55	95.835	NaN
P11388	371	P11388	P11388	DNA topoisomerase 2-alpha	TOP2A	VKNHMWIFVNALIENPTFDSQTKENMTLQPK	1060	P	3	1635		VKNHMWIFVN	A	L	I	E	N	P	T	F	D	S	Q	TKENMTLQPK	0.890396	0.00052202	66.012	60.637	66.012	0.37437	79888000	0.890396	NaN	NaN	66.012	NaN	NaN
P11388	1389	P11388	P11388	DNA topoisomerase 2-alpha	TOP2A	SVVSDLEADDVKGSVPLSSSPPATHFPDETE	1061	P	3	1635		SVVSDLEADD	V	K	G	S	V	P	L	S	S	S	P	PATHFPDETE	0.974467	2.17e-08	66.828	63.8	53.728	-2.3505	8958400000	0.974467	0.971085	0.894345	66.828	45.751	46.351
P11388	1394	P11388	P11388	DNA topoisomerase 2-alpha	TOP2A	LEADDVKGSVPLSSSPPATHFPDETEITNPV	1062	P	4	1635		LEADDVKGSV	P	L	S	S	S	P	P	A	T	H	F	PDETEITNPV	0.962954	2.17e-08	66.828	63.8	44.915	-1.487	9382000000	0.924488	0.962954	0.88022	66.828	50.817	46.351
P11388	1395	P11388	P11388	DNA topoisomerase 2-alpha	TOP2A	EADDVKGSVPLSSSPPATHFPDETEITNPVP	1063	P	4	1635		EADDVKGSVP	L	S	S	S	P	P	A	T	H	F	P	DETEITNPVP	0.962954	2.17e-08	66.828	63.8	44.915	-1.487	9382000000	0.924488	0.962954	0.88022	66.828	50.817	46.351
P11388	1400	P11388	P11388	DNA topoisomerase 2-alpha	TOP2A	KGSVPLSSSPPATHFPDETEITNPVPKKNVT	1064	P	3	1635		KGSVPLSSSP	P	A	T	H	F	P	D	E	T	E	I	TNPVPKKNVT	0.945558	2.17e-08	66.828	63.8	50.817	-1.4976	9382000000	0.924488	0.945558	0.88022	66.828	50.817	46.351
P11388	1408	P11388	P11388	DNA topoisomerase 2-alpha	TOP2A	SPPATHFPDETEITNPVPKKNVTVKKTAAKS	1065	P	3	1635		SPPATHFPDE	T	E	I	T	N	P	V	P	K	K	N	VTVKKTAAKS	0.945558	2.17e-08	66.828	63.8	50.817	-1.4976	9382000000	0.938371	0.945558	0.88022	66.828	50.817	46.351
P11388	1410	P11388	P11388	DNA topoisomerase 2-alpha	TOP2A	PATHFPDETEITNPVPKKNVTVKKTAAKSQS	1066	P	4	1635		PATHFPDETE	I	T	N	P	V	P	K	K	N	V	T	VKKTAAKSQS	0.941942	2.17e-08	66.828	63.8	46.608	-1.7828	7535300000	0.941942	0.827436	0	66.828	50.817	NaN
P11413	415	P11413	P11413	Glucose-6-phosphate 1-dehydrogenase	G6PD	VYTKMMTKKPGMFFNPEESELDLTYGNRYKN	1068	P	2	1636		VYTKMMTKKP	G	M	F	F	N	P	E	E	S	E	L	DLTYGNRYKN	0.981342	1.11e-05	111.63	108.48	86.467	0.2173	2281700000	0.981342	0.964276	0.966044	86.467	93.958	111.63
P11441	92	P11441	P11441	Ubiquitin-like protein 4A	UBL4A	VLLEEGEAQRLADSPPPQVWQLISKVLARHF	1069	P	2	1637		VLLEEGEAQR	L	A	D	S	P	P	P	Q	V	W	Q	LISKVLARHF	0.999679	0.0294423	87.184	71.428	87.184	1.7323	66922000	0.999679	NaN	NaN	87.184	NaN	NaN
P11441	93	P11441	P11441	Ubiquitin-like protein 4A	UBL4A	LLEEGEAQRLADSPPPQVWQLISKVLARHFS	1070	P	2	1637		LLEEGEAQRL	A	D	S	P	P	P	Q	V	W	Q	L	ISKVLARHFS	0.999679	0.0294423	87.184	71.428	87.184	1.7323	66922000	0.999679	NaN	NaN	87.184	NaN	NaN
P11498	561	P11498	P11498	Pyruvate carboxylase, mitochondrial	PC	LREGPEGFARAVRNHPGLLLMDTTFRDAHQS	1072	P	4	1639		LREGPEGFAR	A	V	R	N	H	P	G	L	L	L	M	DTTFRDAHQS	1	0.0106264	47.808	41.904	47.808	0.76865	29569000	1	NaN	1	47.392	NaN	47.808
P11586	272	P11586	P11586	C-1-tetrahydrofolate synthase, cytoplasmic;Methylenetetrahydrofolate dehydrogenase;Methenyltetrahydrofolate cyclohydrolase;Formyltetrahydrofolate synthetase;C-1-tetrahydrofolate synthase, cytoplasmic, N-terminally processed	MTHFD1	AYDEAKERASFITPVPGGVGPMTVAMLMQST	1073	P	3	1641		AYDEAKERAS	F	I	T	P	V	P	G	G	V	G	P	MTVAMLMQST	0.987983	0.00931161	44.596	44.596	44.596	-0.96156	214120000	NaN	NaN	0.987983	NaN	NaN	44.596
P11766	243	P11766	P11766	Alcohol dehydrogenase class-3	ADH5	KFARAKEFGATECINPQDFSKPIQEVLIEMT	1078	P	2	1643		KFARAKEFGA	T	E	C	I	N	P	Q	D	F	S	K	PIQEVLIEMT	1	0.0142902	106.4	85.699	88.134	-0.048494	191630000	1	NaN	NaN	106.4	NaN	NaN
P11802	239	P11802	P11802	Cyclin-dependent kinase 4	CDK4	GKIFDLIGLPPEDDWPRDVSLPRGAFPPRGP	1080	P	3	1644		GKIFDLIGLP	P	E	D	D	W	P	R	D	V	S	L	PRGAFPPRGP	0.993515	0.00247987	73.783	66.366	73.783	0.89914	12421000	0.993515	NaN	NaN	73.783	NaN	NaN
P11802	245	P11802	P11802	Cyclin-dependent kinase 4	CDK4	IGLPPEDDWPRDVSLPRGAFPPRGPRPVQSV	1081	P	3	1644		IGLPPEDDWP	R	D	V	S	L	P	R	G	A	F	P	PRGPRPVQSV	0.987001	0.00247987	73.783	66.366	73.783	0.89914	12421000	0.987001	NaN	NaN	73.783	NaN	NaN
P11908	276	P11908	P11908	Ribose-phosphate pyrophosphokinase 2	PRPS2	INNAAFEAVVVTNTIPQEDKMKHCTKIQVID	1082	P	4	1646		INNAAFEAVV	V	T	N	T	I	P	Q	E	D	K	M	KHCTKIQVID	1	2.57e-06	120.63	112.73	73.655	0.60993	377190000	1	1	1	80.132	120.63	50.851
P11940	600	P11940	P11940	Polyadenylate-binding protein 1	PABPC1	LLEIDNSELLHMLESPESLRSKVDEAVAVLQ	1083	P	6	1648		LLEIDNSELL	H	M	L	E	S	P	E	S	L	R	S	KVDEAVAVLQ	1	2.71e-12	72.879	71.645	72.879	-0.44177	322130000	1	0.857124	0	72.879	50.706	NaN
P11940	568	P11940	P11940	Polyadenylate-binding protein 1	PABPC1	APPQEQKQMLGERLFPLIQAMHPTLAGKITG	1084	P	5	1648		APPQEQKQML	G	E	R	L	F	P	L	I	Q	A	M	HPTLAGKITG	0.999998	2.04e-10	73.707	73.707	58.131	-2.0652	492250000	NaN	0.999998	0.989519	NaN	58.131	73.707
P11940	575	P11940	P11940	Polyadenylate-binding protein 1	PABPC1	QMLGERLFPLIQAMHPTLAGKITGMLLEIDN	1085	P	4	1648		QMLGERLFPL	I	Q	A	M	H	P	T	L	A	G	K	ITGMLLEIDN	1	2.86e-35	160.4	155.35	160.4	0.056244	1329500000	1	0.999997	0.998115	160.4	65.58	80.693
P11940	6	P11940	P11940	Polyadenylate-binding protein 1	PABPC1	__________MNPSAPSYPMASLYVGDLHPD	1086	P	3	1648		__________	M	N	P	S	A	P	S	Y	P	M	A	SLYVGDLHPD	0.513038	6.78e-12	108.44	108.44	108.44	-0.12463	135860000	0.510672	0.486906	0.513038	98.551	80.828	108.44
P11940	20	P11940	P11940	Polyadenylate-binding protein 1	PABPC1	APSYPMASLYVGDLHPDVTEAMLYEKFSPAG	1088	P	4	1648		APSYPMASLY	V	G	D	L	H	P	D	V	T	E	A	MLYEKFSPAG	0.999765	3.25e-18	126.16	126.16	43.622	-0.69545	2644500000	0.999083	0.989419	0.999765	58.11	125.37	126.16
P11940	535	P11940	P11940	Polyadenylate-binding protein 1	PABPC1	PQQHLNAQPQVTMQQPAVHVQGQEPLTASML	1089	P	4	1648		PQQHLNAQPQ	V	T	M	Q	Q	P	A	V	H	V	Q	GQEPLTASML	0.78773	1.1e-13	117.15	113.81	117.15	-0.63381	254440000	0.560252	0.78773	NaN	49.193	117.15	NaN
P11940	544	P11940	P11940	Polyadenylate-binding protein 1	PABPC1	QVTMQQPAVHVQGQEPLTASMLASAPPQEQK	1090	P	4	1648		QVTMQQPAVH	V	Q	G	Q	E	P	L	T	A	S	M	LASAPPQEQK	0.978833	5.95e-11	91.269	87.267	91.269	0.62929	495540000	0.978833	0.831125	0.835004	91.269	54.983	74.328
P11940;Q13310	62;62	P11940;Q13310	P11940	Polyadenylate-binding protein 1;Polyadenylate-binding protein 4	PABPC1;PABPC4	ITRRSLGYAYVNFQQPADAERALDTMNFDVI	1091	P	3	1648;3556		ITRRSLGYAY	V	N	F	Q	Q	P	A	D	A	E	R	ALDTMNFDVI	1	0.0100901	54.259	48.809	54.259	0.60455	125210000	1	NaN	NaN	54.259	NaN	NaN
P12004	220	P12004	P12004	Proliferating cell nuclear antigen	PCNA	LTFALRYLNFFTKATPLSSTVTLSMSADVPL	1092	P	4	1649		LTFALRYLNF	F	T	K	A	T	P	L	S	S	T	V	TLSMSADVPL	0.999955	1.34e-05	82.62	82.62	62.611	-1.3178	6745600000	0.999623	0.999955	0.999907	60.278	64.295	82.62
P12004	129	P12004	P12004	Proliferating cell nuclear antigen	PCNA	YEMKLMDLDVEQLGIPEQEYSCVVKMPSGEF	1093	P	3	1649		YEMKLMDLDV	E	Q	L	G	I	P	E	Q	E	Y	S	CVVKMPSGEF	1	0.000901339	63.436	59.485	63.436	0.32761	19262000	1	NaN	NaN	63.436	NaN	NaN
P12004	202	P12004	P12004	Proliferating cell nuclear antigen	PCNA	NVDKEEEAVTIEMNEPVQLTFALRYLNFFTK	1094	P	5	1649		NVDKEEEAVT	I	E	M	N	E	P	V	Q	L	T	F	ALRYLNFFTK	1	0.00317025	44.555	39.011	44.555	0.034709	28389000	1	NaN	NaN	44.555	NaN	NaN
P12074	83	P12074	P12074	Cytochrome c oxidase subunit 6A1, mitochondrial	COX6A1	RPEFIAYPHLRIRTKPFPWGDGNHTLFHNPH	1095	P	4	1651		RPEFIAYPHL	R	I	R	T	K	P	F	P	W	G	D	GNHTLFHNPH	0.754872	0.0107993	57.339	51.796	57.339	-0.58061	43895000	NaN	0.754872	NaN	NaN	57.339	NaN
P12074	85	P12074	P12074	Cytochrome c oxidase subunit 6A1, mitochondrial	COX6A1	EFIAYPHLRIRTKPFPWGDGNHTLFHNPHVN	1096	P	4	1651		EFIAYPHLRI	R	T	K	P	F	P	W	G	D	G	N	HTLFHNPHVN	0.691697	0.0107993	57.339	51.796	57.339	-0.58061	43895000	NaN	0.691697	NaN	NaN	57.339	NaN
P12235;P12236	133;133	P12235;P12236	P12236	ADP/ATP translocase 1;ADP/ATP translocase 3;ADP/ATP translocase 3, N-terminally processed	SLC25A4;SLC25A6	ASGGAAGATSLCFVYPLDFARTRLAADVGKG;ASGGAAGATSLCFVYPLDFARTRLAADVGKS	1097	P	2	1654;1655		ASGGAAGATS	L	C	F	V	Y	P	L	D	F	A	R	TRLAADVGKG	1	0.0228591	97.797	86.853	97.797	-0.61693	26979000	1	NaN	NaN	97.797	NaN	NaN
P12270	1678	P12270	P12270	Nucleoprotein TPR	TPR	DPPTANIKPTPVVSTPSKVTAAAMAGNKSTP	1098	P	4	1657		DPPTANIKPT	P	V	V	S	T	P	S	K	V	T	A	AAMAGNKSTP	0.925607	0.0026933	45.22	39.9	45.22	0.4821	41513000	NaN	0.925607	NaN	NaN	45.22	NaN
P12277	275	P12277	P12277	Creatine kinase B-type	CKB	IETLFKSKDYEFMWNPHLGYILTCPSNLGTG	1099	P	3	1658		IETLFKSKDY	E	F	M	W	N	P	H	L	G	Y	I	LTCPSNLGTG	1	7.47e-28	163.94	157.65	59.628	-1.6792	13317000000	1	1	1	107.87	163.76	163.94
P12277	284	P12277	P12277	Creatine kinase B-type	CKB	YEFMWNPHLGYILTCPSNLGTGLRAGVHIKL	1100	P	3	1658		YEFMWNPHLG	Y	I	L	T	C	P	S	N	L	G	T	GLRAGVHIKL	1	0.000123237	87.439	81.837	59.628	-1.6792	2097600000	1	1	1	87.439	61.488	70.718
P12277	112	P12277	P12277	Creatine kinase B-type	CKB	HGGYKPSDEHKTDLNPDNLQGGDDLDPNYVL	1101	P	3	1658		HGGYKPSDEH	K	T	D	L	N	P	D	N	L	Q	G	GDDLDPNYVL	0.583815	0.0274068	44.632	41.831	44.632	2.3177	176230000	NaN	NaN	0.583815	NaN	NaN	44.632
P12277	123	P12277	P12277	Creatine kinase B-type	CKB	TDLNPDNLQGGDDLDPNYVLSSRVRTGRSIR	1102	P	5	1658		TDLNPDNLQG	G	D	D	L	D	P	N	Y	V	L	S	SRVRTGRSIR	0.997577	2.85e-06	76.476	72.117	76.476	-0.68578	44521000	0.99472	NaN	0.997577	55.101	NaN	76.476
P12277	378	P12277	P12277	Creatine kinase B-type	CKB	MEQRLEQGQAIDDLMPAQK____________	1103	P	3	1658		MEQRLEQGQA	I	D	D	L	M	P	A	Q	K	_	_	__________	1	0.00325999	48.229	41.354	48.229	0.67373	0	NaN	1	NaN	NaN	48.229	NaN
P12277	21	P12277	P12277	Creatine kinase B-type	CKB	SHNALKLRFPAEDEFPDLSAHNNHMAKVLTP	1104	P	5	1658		SHNALKLRFP	A	E	D	E	F	P	D	L	S	A	H	NNHMAKVLTP	0.999962	0.0136046	47.047	44.505	47.047	-1.1111	1742600	NaN	0.999962	NaN	NaN	47.047	NaN
P12277	197	P12277	P12277	Creatine kinase B-type	CKB	AEQQQLIDDHFLFDKPVSPLLLASGMARDWP	1105	P	3	1658		AEQQQLIDDH	F	L	F	D	K	P	V	S	P	L	L	LASGMARDWP	0.832589	1.75e-06	57.025	43.972	57.025	-2.6715	0	NaN	0.832589	NaN	NaN	57.025	NaN
P12277	200	P12277	P12277	Creatine kinase B-type	CKB	QQLIDDHFLFDKPVSPLLLASGMARDWPDAR	1106	P	5	1658		QQLIDDHFLF	D	K	P	V	S	P	L	L	L	A	S	GMARDWPDAR	0.995675	6.51e-73	205.72	205.72	112.65	-2.7537	1233100000	0.99114	0.995675	0.978338	136.43	145.64	205.72
P12277	212	P12277	P12277	Creatine kinase B-type	CKB	PVSPLLLASGMARDWPDARGIWHNDNKTFLV	1107	P	5	1658		PVSPLLLASG	M	A	R	D	W	P	D	A	R	G	I	WHNDNKTFLV	0.993761	7.37e-35	160.9	156.32	123.95	-0.089673	916810000	0.931904	0.993761	0.983565	77.766	145.64	160.9
P12277	48	P12277	P12277	Creatine kinase B-type	CKB	VLTPELYAELRAKSTPSGFTLDDVIQTGVDN	1108	P	4	1658		VLTPELYAEL	R	A	K	S	T	P	S	G	F	T	L	DDVIQTGVDN	0.79509	5.44e-08	55.919	52.35	49.806	-0.38579	158290000	0.764472	0.775693	0.79509	55.919	49.806	49.806
P12532	233	P12532	P12532	Creatine kinase U-type, mitochondrial	CKMT1A	QQLIDDHFLFDKPVSPLLTAAGMARDWPDAR	1109	P	3	1660		QQLIDDHFLF	D	K	P	V	S	P	L	L	T	A	A	GMARDWPDAR	0.972902	2.3e-06	111.79	111.79	111.79	-0.12013	101340000	NaN	0.855481	0.972902	NaN	109.09	111.79
P12694	170	P12694	P12694	2-oxoisovalerate dehydrogenase subunit alpha, mitochondrial	BCKDHA	FGQYREAGVLMYRDYPLELFMAQCYGNISDL	1110	P	3	1661		FGQYREAGVL	M	Y	R	D	Y	P	L	E	L	F	M	AQCYGNISDL	1	0.000130227	109.55	98.648	109.55	-0.35913	54611000	NaN	1	NaN	NaN	109.55	NaN
P12814	591	P12814	P12814	Alpha-actinin-1	ACTN1	SKIVQTYHVNMAGTNPYTTITPQEINGKWDH	1111	P	5	1664		SKIVQTYHVN	M	A	G	T	N	P	Y	T	T	I	T	PQEINGKWDH	0.999469	0.00329875	41.661	36.947	41.661	1.3906	289830000	0.997923	0.999469	NaN	40.764	41.661	NaN
P12931	307	P12931	P12931	Proto-oncogene tyrosine-protein kinase Src	SRC	TTRVAIKTLKPGTMSPEAFLQEAQVMKKLRH	1113	P	3	1666		TTRVAIKTLK	P	G	T	M	S	P	E	A	F	L	Q	EAQVMKKLRH	0.559963	0.00145527	65.25	60.897	65.25	-0.76687	27097000	NaN	0.559963	NaN	NaN	65.25	NaN
P12955	7	P12955	P12955	Xaa-Pro dipeptidase	PEPD	_________MAAATGPSFWLGNETLKVPLAL	1115	P	2	1667		_________M	A	A	A	T	G	P	S	F	W	L	G	NETLKVPLAL	1	0.00415353	53.528	29.923	53.528	2.9686	0	NaN	1	NaN	NaN	53.528	NaN
P12956	352	P12956	P12956	X-ray repair cross-complementing protein 6	XRCC6	LKRFDDPGLMLMGFKPLVLLKKHHYLRPSLF	1117	P	3	1668		LKRFDDPGLM	L	M	G	F	K	P	L	V	L	L	K	KHHYLRPSLF	0.568744	0.0330229	41.695	30.58	41.695	-1.1316	137680000	0.568744	NaN	NaN	41.695	NaN	NaN
P12956	509	P12956	P12956	X-ray repair cross-complementing protein 6	XRCC6	ALDLMEPEQAVDLTLPKVEAMNKRLGSLVDE	1118	P	3	1668		ALDLMEPEQA	V	D	L	T	L	P	K	V	E	A	M	NKRLGSLVDE	0.999986	0.000168922	113.5	98.845	101.49	1.1673	128230000	NaN	NaN	0.999986	NaN	NaN	113.5
P13010	506	P13010	P13010	X-ray repair cross-complementing protein 5	XRCC5	FQCLLHRALHPREPLPPIQQHIWNMLNPPAE	1119	P	3	1669		FQCLLHRALH	P	R	E	P	L	P	P	I	Q	Q	H	IWNMLNPPAE	0.996592	2.69e-05	89.466	79.473	65.454	0.26953	8166100000	0.996515	0.996592	0.976481	78.3	89.466	63.491
P13010	507	P13010	P13010	X-ray repair cross-complementing protein 5	XRCC5	QCLLHRALHPREPLPPIQQHIWNMLNPPAEV	1120	P	3	1669		QCLLHRALHP	R	E	P	L	P	P	I	Q	Q	H	I	WNMLNPPAEV	0.998643	2.69e-05	89.466	79.473	65.454	0.26953	11703000000	0.996603	0.998643	0.976481	78.3	89.466	74.364
P13010	518	P13010	P13010	X-ray repair cross-complementing protein 5	XRCC5	EPLPPIQQHIWNMLNPPAEVTTKSQIPLSKI	1121	P	3	1669		EPLPPIQQHI	W	N	M	L	N	P	P	A	E	V	T	TKSQIPLSKI	0.861164	0.000136454	69.088	64.121	69.088	0.22138	1295800000	0.861164	0.831685	0	69.088	62.284	NaN
P13010	519	P13010	P13010	X-ray repair cross-complementing protein 5	XRCC5	PLPPIQQHIWNMLNPPAEVTTKSQIPLSKIK	1122	P	3	1669		PLPPIQQHIW	N	M	L	N	P	P	A	E	V	T	T	KSQIPLSKIK	0.82773	0.000136454	69.088	64.121	62.284	0.43844	1295800000	0.809079	0.82773	0	69.088	62.284	NaN
P13073	45	P13073	P13073	Cytochrome c oxidase subunit 4 isoform 1, mitochondrial	COX4I1	SEDFSLPAYMDRRDHPLPEVAHVKHLSASQK	1125	P	6	1672		SEDFSLPAYM	D	R	R	D	H	P	L	P	E	V	A	HVKHLSASQK	0.887189	0.00181781	55.734	50.604	47.058	0.24975	4766100000	0.868286	0.693505	0.887189	51.175	50.055	55.734
P13164	13	P13164	P13164	Interferon-induced transmembrane protein 1	IFITM1	___MHKEEHEVAVLGPPPSTILPRSTVINIH	1126	P	4	1673		___MHKEEHE	V	A	V	L	G	P	P	P	S	T	I	LPRSTVINIH	0.994832	0.002103	59.512	55.918	59.512	0.064513	2122200000	0.994832	0.992985	0.992591	59.512	50.883	59.512
P13489	249	P13489	P13489	Ribonuclease inhibitor	RNH1	LGSNKLGDVGMAELCPGLLHPSSRLRTLWIW	1127	P	3	1678		LGSNKLGDVG	M	A	E	L	C	P	G	L	L	H	P	SSRLRTLWIW	0.993843	0.00950213	50.87	47.029	43.764	-1.2256	127880000	NaN	0.993843	NaN	NaN	50.87	NaN
P13591	615	P13591	P13591	Neural cell adhesion molecule 1	NCAM1	ASEFKTQPVQGEPSAPKLEGQMGEDGNSIKV	1128	P	4	1680		ASEFKTQPVQ	G	E	P	S	A	P	K	L	E	G	Q	MGEDGNSIKV	0.942671	3.89e-06	58.49	52.691	58.49	1.3252	114080000	0.942671	0.765199	NaN	58.49	56.864	NaN
P13639	752	P13639	P13639	Elongation factor 2	EEF2	QPRLMEPIYLVEIQCPEQVVGGIYGVLNRKR	1130	P	3	1684		QPRLMEPIYL	V	E	I	Q	C	P	E	Q	V	V	G	GIYGVLNRKR	0.996899	0.00175633	53.475	43.505	53.475	-0.36703	24718000	NaN	0.996899	NaN	NaN	53.475	NaN
P13639	345	P13639	P13639	Elongation factor 2	EEF2	KEGKPLLKAVMRRWLPAGDALLQMITIHLPS	1131	P	2	1684		KEGKPLLKAV	M	R	R	W	L	P	A	G	D	A	L	LQMITIHLPS	1	8.46e-68	227	207.18	227	-0.17169	3381100000	1	1	1	227	207.92	153.48
P13639	810	P13639	P13639	Elongation factor 2	EEF2	GFTADLRSNTGGQAFPQCVFDHWQILPGDPF	1134	P	4	1684		GFTADLRSNT	G	G	Q	A	F	P	Q	C	V	F	D	HWQILPGDPF	0.99964	1.06e-08	63.282	57.968	63.282	-1.3273	554450000	0.99964	0.979537	0.989725	63.282	51.848	57.832
P13639	821	P13639	P13639	Elongation factor 2	EEF2	GQAFPQCVFDHWQILPGDPFDNSSRPSQVVA	1135	P	4	1684		GQAFPQCVFD	H	W	Q	I	L	P	G	D	P	F	D	NSSRPSQVVA	0.998453	1.06e-08	63.282	57.968	56.864	1.316	515240000	0.998453	NaN	0.951505	63.282	NaN	57.832
P13639	824	P13639	P13639	Elongation factor 2	EEF2	FPQCVFDHWQILPGDPFDNSSRPSQVVAETR	1136	P	4	1684		FPQCVFDHWQ	I	L	P	G	D	P	F	D	N	S	S	RPSQVVAETR	0.998453	1.06e-08	63.282	57.968	56.864	1.316	515240000	0.998453	NaN	NaN	63.282	NaN	NaN
P13639	460	P13639	P13639	Elongation factor 2	EEF2	KPIQRTILMMGRYVEPIEDVPCGNIVGLVGV	1137	P	3	1684		KPIQRTILMM	G	R	Y	V	E	P	I	E	D	V	P	CGNIVGLVGV	0.866879	0.00252398	50.492	45.385	50.492	1.3951	4498600	NaN	0.866879	NaN	NaN	50.492	NaN
P13639	465	P13639	P13639	Elongation factor 2	EEF2	TILMMGRYVEPIEDVPCGNIVGLVGVDQFLV	1138	P	2	1684		TILMMGRYVE	P	I	E	D	V	P	C	G	N	I	V	GLVGVDQFLV	0.999959	0.00213968	102.64	92.44	102.64	1.3515	30036000	NaN	0.999959	NaN	NaN	102.64	NaN
P13667	89	P13667	P13667	Protein disulfide-isomerase A4	PDIA4	NFVADKDTVLLEFYAPWCGHCKQFAPEYEKI	1139	P	2	1685		NFVADKDTVL	L	E	F	Y	A	P	W	C	G	H	C	KQFAPEYEKI	1	8.19e-21	196.76	184.2	108.7	-0.82073	1330700000	1	1	1	170.52	170.52	196.76
P13674	154	P13674	P13674	Prolyl 4-hydroxylase subunit alpha-1	P4HA1	DTYNLDTDTISKGNLPGVKHKSFLTAEDCFE	1141	P	2	1686		DTYNLDTDTI	S	K	G	N	L	P	G	V	K	H	K	SFLTAEDCFE	1	0.000522157	97.767	85.601	97.767	0.92672	13589000	NaN	1	NaN	NaN	97.767	NaN
P13796	148	P13796	P13796	Plastin-2	LCP1	ALENDPDCRHVIPMNPNTNDLFNAVGDGIVL	1143	P	4	1690		ALENDPDCRH	V	I	P	M	N	P	N	T	N	D	L	FNAVGDGIVL	0.587258	6.07e-05	102.17	97.245	102.17	-0.75751	148100000	NaN	NaN	0.587258	NaN	NaN	102.17
P13796	436	P13796	P13796	Plastin-2	LCP1	SDALVIFQLYEKIKVPVDWNRVNKPPYPKLG	1144	P	4	1690		SDALVIFQLY	E	K	I	K	V	P	V	D	W	N	R	VNKPPYPKLG	1	0.000813997	57.351	52.395	57.351	-4.3679	106080000	NaN	NaN	1	NaN	NaN	57.351
P13797	378	P13797	P13797	Plastin-3	PLS3	PKLNLAFVANLFNKYPALTKPENQDIDWTLL	1146	P	3	1691		PKLNLAFVAN	L	F	N	K	Y	P	A	L	T	K	P	ENQDIDWTLL	1	8.12e-05	84.067	75.869	80.418	0.081991	337830000	1	1	NaN	84.067	78.415	NaN
P13797	383	P13797	P13797	Plastin-3	PLS3	AFVANLFNKYPALTKPENQDIDWTLLEGETR	1147	P	3	1691		AFVANLFNKY	P	A	L	T	K	P	E	N	Q	D	I	DWTLLEGETR	1	8.12e-05	84.067	75.869	80.418	0.081991	353390000	1	1	0.824069	84.067	78.415	51.323
P13797	414	P13797	P13797	Plastin-3	PLS3	EERTFRNWMNSLGVNPHVNHLYADLQDALVI	1148	P	5	1691		EERTFRNWMN	S	L	G	V	N	P	H	V	N	H	L	YADLQDALVI	1	7.09e-16	145.62	138.33	54.583	0.35754	1807500000	NaN	1	1	NaN	115.39	145.62
P13797	564	P13797	P13797	Plastin-3	PLS3	ISSSLAVVDLIDAIQPGCINYDLVKSGNLTE	1149	P	3	1691		ISSSLAVVDL	I	D	A	I	Q	P	G	C	I	N	Y	DLVKSGNLTE	1	0.000137011	81.65	75.286	81.65	2.5844	28424000	1	NaN	NaN	81.65	NaN	NaN
P13995	174	P13995	P13995	Bifunctional methylenetetrahydrofolate dehydrogenase/cyclohydrolase, mitochondrial;NAD-dependent methylenetetrahydrofolate dehydrogenase;Methenyltetrahydrofolate cyclohydrolase	MTHFD2	VINVGRMCLDQYSMLPATPWGVWEIIKRTGI	1152	P	3	1701		VINVGRMCLD	Q	Y	S	M	L	P	A	T	P	W	G	VWEIIKRTGI	1	0.000769957	51.526	48.036	51.526	0.47391	19713000	NaN	1	NaN	NaN	51.526	NaN
P13995	177	P13995	P13995	Bifunctional methylenetetrahydrofolate dehydrogenase/cyclohydrolase, mitochondrial;NAD-dependent methylenetetrahydrofolate dehydrogenase;Methenyltetrahydrofolate cyclohydrolase	MTHFD2	VGRMCLDQYSMLPATPWGVWEIIKRTGIPTL	1153	P	3	1701		VGRMCLDQYS	M	L	P	A	T	P	W	G	V	W	E	IIKRTGIPTL	1	0.000769957	51.526	48.036	51.526	0.47391	19713000	NaN	1	NaN	NaN	51.526	NaN
P13995	222	P13995	P13995	Bifunctional methylenetetrahydrofolate dehydrogenase/cyclohydrolase, mitochondrial;NAD-dependent methylenetetrahydrofolate dehydrogenase;Methenyltetrahydrofolate cyclohydrolase	MTHFD2	MPIAMLLHTDGAHERPGGDATVTISHRYTPK	1155	P	6	1701		MPIAMLLHTD	G	A	H	E	R	P	G	G	D	A	T	VTISHRYTPK	0.978024	0.00149906	43.31	36.876	43.31	2.0736	53720000	NaN	0.978024	NaN	NaN	43.31	NaN
P14314	443	P14314	P14314	Glucosidase 2 subunit beta	PRKCSH	CPFKLVSQKPKLGGSPTSLGTWGSWIGPDHD	1157	P	3	1704		CPFKLVSQKP	K	L	G	G	S	P	T	S	L	G	T	WGSWIGPDHD	1	0.018564	40.756	20.78	40.756	1.2681	39193000	NaN	1	NaN	NaN	40.756	NaN
P14314	455	P14314	P14314	Glucosidase 2 subunit beta	PRKCSH	GGSPTSLGTWGSWIGPDHDKFSAMKYEQGTG	1158	P	3	1704		GGSPTSLGTW	G	S	W	I	G	P	D	H	D	K	F	SAMKYEQGTG	1	4.05e-08	86.081	81.208	40.756	1.2681	197850000	NaN	1	0.999977	NaN	85.203	86.081
P14324	102	P14324	P14324	Farnesyl pyrophosphate synthase	FDPS	FSQIVRVLTEDEMGHPEIGDAIARLKEVLEY	1159	P	3	1706		FSQIVRVLTE	D	E	M	G	H	P	E	I	G	D	A	IARLKEVLEY	1	0.00223452	71.558	66.656	71.558	-0.1854	4607500000	NaN	NaN	1	NaN	NaN	71.558
P14373	264	P14373	P14373	Zinc finger protein RFP	TRIM27	QDIGDTLSRAERIRIPEPWITPPDLQEKIHI	1160	P	5	1707		QDIGDTLSRA	E	R	I	R	I	P	E	P	W	I	T	PPDLQEKIHI	0.90537	0.00566059	44.632	37.757	44.632	-0.95715	34761000	0.90537	NaN	NaN	44.632	NaN	NaN
P14373	266	P14373	P14373	Zinc finger protein RFP	TRIM27	IGDTLSRAERIRIPEPWITPPDLQEKIHIFA	1161	P	5	1707		IGDTLSRAER	I	R	I	P	E	P	W	I	T	P	P	DLQEKIHIFA	0.973771	0.00566059	44.632	37.757	44.632	-0.95715	34761000	0.973771	NaN	NaN	44.632	NaN	NaN
P14550	223	P14550	P14550	Alcohol dehydrogenase [NADP(+)]	AKR1A1	TAYSPLGSSDRAWRDPDEPVLLEEPVVLALA	1162	P	3	1712		TAYSPLGSSD	R	A	W	R	D	P	D	E	P	V	L	LEEPVVLALA	0.999997	0.017931	61.222	54.11	61.222	0.9238	76790000	NaN	0.999997	NaN	NaN	61.222	NaN
P14550	226	P14550	P14550	Alcohol dehydrogenase [NADP(+)]	AKR1A1	SPLGSSDRAWRDPDEPVLLEEPVVLALAEKY	1163	P	3	1712		SPLGSSDRAW	R	D	P	D	E	P	V	L	L	E	E	PVVLALAEKY	0.999997	0.017931	61.222	54.11	61.222	0.9238	76790000	NaN	0.999997	NaN	NaN	61.222	NaN
P14618	323	P14618	P14618	Pyruvate kinase PKM	PKM	LAQKMMIGRCNRAGKPVICATQMLESMIKKP	1166	P	3	1713		LAQKMMIGRC	N	R	A	G	K	P	V	I	C	A	T	QMLESMIKKP	1	0.01801	65.949	49.83	47.64	-0.095111	129960000	1	1	NaN	47.64	65.949	NaN
P14618	517	P14618	P14618	Pyruvate kinase PKM	PKM	FFKKGDVVIVLTGWRPGSGFTNTMRVVPVP_	1167	P	3	1713		FFKKGDVVIV	L	T	G	W	R	P	G	S	G	F	T	NTMRVVPVP_	1	2.44e-06	105.92	98.212	81.949	1.1791	9203300000	1	1	1	70.917	83.769	105.92
P14618	471	P14618	P14618	Pyruvate kinase PKM	PKM	NPQTARQAHLYRGIFPVLCKDPVQEAWAEDV	1168	P	3	1713		NPQTARQAHL	Y	R	G	I	F	P	V	L	C	K	D	PVQEAWAEDV	1	0.00131444	58.861	49.64	45.22	0.3931	890970000	1	1	1	50.865	54.311	58.861
P14618	477	P14618	P14618	Pyruvate kinase PKM	PKM	QAHLYRGIFPVLCKDPVQEAWAEDVDLRVNF	1169	P	3	1713		QAHLYRGIFP	V	L	C	K	D	P	V	Q	E	A	W	AEDVDLRVNF	1	0.00131444	58.861	49.64	45.22	0.3931	909640000	1	1	1	50.865	54.311	58.861
P14618	107	P14618	P14618	Pyruvate kinase PKM	PKM	RTATESFASDPILYRPVAVALDTKGPEIRTG	1170	P	4	1713		RTATESFASD	P	I	L	Y	R	P	V	A	V	A	L	DTKGPEIRTG	0.928754	0.000173906	72.569	66.474	72.569	-0.5164	26316000	NaN	NaN	0.928754	NaN	NaN	72.569
P14625	617	P14625	P14625	Endoplasmin	HSP90B1	EKTKESREAVEKEFEPLLNWMKDKALKDKIE	1171	P	2	1715		EKTKESREAV	E	K	E	F	E	P	L	L	N	W	M	KDKALKDKIE	1	0.0124923	96.334	76.657	96.334	-2.9807	0	NaN	NaN	1	NaN	NaN	96.334
P14625	571	P14625	P14625	Endoplasmin	HSP90B1	ERLLKKGYEVIYLTEPVDEYCIQALPEFDGK	1173	P	3	1715		ERLLKKGYEV	I	Y	L	T	E	P	V	D	E	Y	C	IQALPEFDGK	0.99996	0.000278397	74.579	68.075	74.579	-0.23865	27345000	0.99996	NaN	NaN	74.579	NaN	NaN
P14625	427	P14625	P14625	Endoplasmin	HSP90B1	YVRRVFITDDFHDMMPKYLNFVKGVVDSDDL	1174	P	3	1715		YVRRVFITDD	F	H	D	M	M	P	K	Y	L	N	F	VKGVVDSDDL	1	0.00104774	91.62	71.611	57.434	-0.62958	4614500000	1	1	1	51.771	91.62	82.069
P14625	730	P14625	P14625	Endoplasmin	HSP90B1	VVLFETATLRSGYLLPDTKAYGDRIERMLRL	1175	P	3	1715		VVLFETATLR	S	G	Y	L	L	P	D	T	K	A	Y	GDRIERMLRL	1	0.0353096	75.018	60.599	75.018	0.82995	89937000	NaN	1	NaN	NaN	75.018	NaN
P14678;P63162	238;238	P14678	P14678	Small nuclear ribonucleoprotein-associated proteins B and B';Small nuclear ribonucleoprotein-associated protein N	SNRPB;SNRPN	PPPGMRGPPPPGMRPPRP_____________	1179	P	2	1719		PPPGMRGPPP	P	G	M	R	P	P	R	P	_	_	_	__________	0.673072	0.0069444	71.223	7.9398	71.223	4.1381	20491000	NaN	NaN	0.673072	NaN	NaN	71.223
P14678;P63162	240;240	P14678	P14678	Small nuclear ribonucleoprotein-associated proteins B and B';Small nuclear ribonucleoprotein-associated protein N	SNRPB;SNRPN	PGMRGPPPPGMRPPRP_______________	1180	P	2	1719		PGMRGPPPPG	M	R	P	P	R	P	_	_	_	_	_	__________	0.673072	0.0069444	71.223	7.9398	71.223	4.1381	20491000	NaN	NaN	0.673072	NaN	NaN	71.223
P14735	548	P14735	P14735	Insulin-degrading enzyme	IDE	TNFEILPLEKEATPYPALIKDTAMSKLWFKQ	1181	P	4	1720		TNFEILPLEK	E	A	T	P	Y	P	A	L	I	K	D	TAMSKLWFKQ	0.856759	0.00030248	58.11	43.58	58.11	-0.22967	218240000	0.856759	NaN	NaN	58.11	NaN	NaN
P14854	66	P14854	P14854	Cytochrome c oxidase subunit 6B1	COX6B1	ISVCEWYQRVYQSLCPTSWVTDWDEQRAEGT	1182	P	3	1721		ISVCEWYQRV	Y	Q	S	L	C	P	T	S	W	V	T	DWDEQRAEGT	1	0.00508076	71.54	62.921	52.79	1.813	84859000	1	1	NaN	71.54	56.947	NaN
P14854	83	P14854	P14854	Cytochrome c oxidase subunit 6B1	COX6B1	SWVTDWDEQRAEGTFPGKI____________	1183	P	3	1721		SWVTDWDEQR	A	E	G	T	F	P	G	K	I	_	_	__________	1	0.00508076	71.54	62.921	52.79	1.813	34391000	1	1	NaN	71.54	52.79	NaN
P14859	277	P14859	P14859	POU domain, class 2, transcription factor 1	POU2F1	QTLPQSQSTPKRIDTPSLEEPSDLEELEQFA	1184	P	3	1722		QTLPQSQSTP	K	R	I	D	T	P	S	L	E	E	P	SDLEELEQFA	1	0.0313073	48.112	10.733	48.112	-1.0556	71969000	NaN	1	NaN	NaN	48.112	NaN
P14859	282	P14859	P14859	POU domain, class 2, transcription factor 1	POU2F1	SQSTPKRIDTPSLEEPSDLEELEQFAKTFKQ	1185	P	3	1722		SQSTPKRIDT	P	S	L	E	E	P	S	D	L	E	E	LEQFAKTFKQ	1	0.0313073	48.112	10.733	48.112	-1.0556	71969000	NaN	1	NaN	NaN	48.112	NaN
P14866	135	P14866	P14866	Heterogeneous nuclear ribonucleoprotein L	HNRNPL	EALQEFGPISYVVVMPKKRQALVEFEDVLGA	1186	P	4	1723		EALQEFGPIS	Y	V	V	V	M	P	K	K	R	Q	A	LVEFEDVLGA	0.998765	0.00291118	43.936	38.88	41.562	1.4156	26720000	NaN	NaN	0.998765	NaN	NaN	43.936
P14866	461	P14866	P14866	Heterogeneous nuclear ribonucleoprotein L	HNRNPL	GQKLNVCVSKQPAIMPGQSYGLEDGSCSYKD	1188	P	3	1723		GQKLNVCVSK	Q	P	A	I	M	P	G	Q	S	Y	G	LEDGSCSYKD	0.543947	0.0250005	48.656	45.318	41.521	-1.5157	56028000	NaN	0.524559	0.543947	NaN	48.656	41.521
P14866	288	P14866	P14866	Heterogeneous nuclear ribonucleoprotein L	HNRNPL	LNVFKNDQDTWDYTNPNLSGQGDPGSNPNKR	1189	P	4	1723		LNVFKNDQDT	W	D	Y	T	N	P	N	L	S	G	Q	GDPGSNPNKR	0.99998	1.02e-05	73.389	68.124	73.389	-1.0842	490570000	0.999433	0.999876	0.99998	66.853	66.474	73.389
P14866	419	P14866	P14866	Heterogeneous nuclear ribonucleoprotein L	HNRNPL	CLYGNVEKVKFMKSKPGAAMVEMADGYAVDR	1190	P	5	1723		CLYGNVEKVK	F	M	K	S	K	P	G	A	A	M	V	EMADGYAVDR	1	4.01e-05	115.15	104.49	48.697	-0.20562	29547000000	1	1	1	97.32	115.15	101.86
P14866	570	P14866	P14866	Heterogeneous nuclear ribonucleoprotein L	HNRNPL	ALETLGFLNHYQMKNPNGPYPYTLKLCFSTA	1191	P	4	1723		ALETLGFLNH	Y	Q	M	K	N	P	N	G	P	Y	P	YTLKLCFSTA	0.962309	2.92e-18	140.3	135.99	140.3	-0.20951	503550000	NaN	0.962309	NaN	NaN	140.3	NaN
P14866	573	P14866	P14866	Heterogeneous nuclear ribonucleoprotein L	HNRNPL	TLGFLNHYQMKNPNGPYPYTLKLCFSTAQHA	1192	P	4	1723		TLGFLNHYQM	K	N	P	N	G	P	Y	P	Y	T	L	KLCFSTAQHA	0.816838	1.48e-08	63.008	51.479	63.008	0.71651	172450000	NaN	0.816838	NaN	NaN	63.008	NaN
P14866	377	P14866	P14866	Heterogeneous nuclear ribonucleoprotein L	HNRNPL	QYGHPPPPPPPPEYGPHADSPVLMVYGLDQS	1196	P	4	1723		QYGHPPPPPP	P	P	E	Y	G	P	H	A	D	S	P	VLMVYGLDQS	0.72884	1.8e-12	101.44	88.853	67.441	-2.4971	654250000	0.454833	0.53014	0.72884	89.577	101.44	101.2
P14868	400	P14868	P14868	Aspartate--tRNA ligase, cytoplasmic	DARS	DTDFYILDKYPLAVRPFYTMPDPRNPKQSNS	1199	P	4	1724		DTDFYILDKY	P	L	A	V	R	P	F	Y	T	M	P	DPRNPKQSNS	0.652643	0.000343725	75.524	69.744	75.524	-0.25586	186120000	0	0.652643	NaN	NaN	75.524	NaN
P14868	405	P14868	P14868	Aspartate--tRNA ligase, cytoplasmic	DARS	ILDKYPLAVRPFYTMPDPRNPKQSNSYDMFM	1200	P	4	1724		ILDKYPLAVR	P	F	Y	T	M	P	D	P	R	N	P	KQSNSYDMFM	0.714832	6.46e-05	85.376	79.596	56.485	-0.25933	801600000	0	0.702925	0.714832	NaN	85.376	77.641
P14923	512	P14923	P14923	Junction plakoglobin	JUP	LVKATIGLIRNLALCPANHAPLQEAAVIPRL	1201	P	3	1725		LVKATIGLIR	N	L	A	L	C	P	A	N	H	A	P	LQEAAVIPRL	0.98467	0.00811968	56.081	48.277	56.081	0.27367	21087000	0.98467	NaN	0.966318	56.081	NaN	51.819
P15121	216	P15121	P15121	Aldose reductase	AKR1B1	QSKGIVVTAYSPLGSPDRPWAKPEDPSLLED	1203	P	4	1730		QSKGIVVTAY	S	P	L	G	S	P	D	R	P	W	A	KPEDPSLLED	0.779104	0.0333408	43.732	38.467	43.732	-0.083862	39982000	NaN	0.779104	NaN	NaN	43.732	NaN
P15121	219	P15121	P15121	Aldose reductase	AKR1B1	GIVVTAYSPLGSPDRPWAKPEDPSLLEDPRI	1204	P	4	1730		GIVVTAYSPL	G	S	P	D	R	P	W	A	K	P	E	DPSLLEDPRI	0.823568	0.0103041	49.101	34.396	43.732	-0.083862	68282000	0.688936	0.823568	NaN	49.101	43.732	NaN
P15121	113	P15121	P15121	Aldose reductase	AKR1B1	SDLKLDYLDLYLIHWPTGFKPGKEFFPLDES	1206	P	5	1730		SDLKLDYLDL	Y	L	I	H	W	P	T	G	F	K	P	GKEFFPLDES	1	0.00153505	77.39	69.857	47.237	0.79148	961810000	1	1	1	72.532	64.028	77.39
P15121	118	P15121	P15121	Aldose reductase	AKR1B1	DYLDLYLIHWPTGFKPGKEFFPLDESGNVVP	1207	P	5	1730		DYLDLYLIHW	P	T	G	F	K	P	G	K	E	F	F	PLDESGNVVP	1	0.00153505	77.39	69.857	47.237	0.79148	961810000	1	1	1	72.532	64.028	77.39
P15121	189	P15121	P15121	Aldose reductase	AKR1B1	PGLKYKPAVNQIECHPYLTQEKLIQYCQSKG	1208	P	3	1730		PGLKYKPAVN	Q	I	E	C	H	P	Y	L	T	Q	E	KLIQYCQSKG	0.999836	0.010666	60.474	55.472	60.474	-0.33921	105230000	0.999836	NaN	0.997082	60.474	NaN	48.899
P15170	42	P15170	P15170	Eukaryotic peptide chain release factor GTP-binding subunit ERF3A	GSPT1	ISEAEPGGGSLGDGRPPEESAHEMMEEEEEI	1209	P	5	1732		ISEAEPGGGS	L	G	D	G	R	P	P	E	E	S	A	HEMMEEEEEI	0.974439	2.1e-05	54.376	54.376	54.376	-0.0016852	84789000	0.974439	0.871892	NaN	54.376	44.915	NaN
P15170	43	P15170	P15170	Eukaryotic peptide chain release factor GTP-binding subunit ERF3A	GSPT1	SEAEPGGGSLGDGRPPEESAHEMMEEEEEIP	1210	P	5	1732		SEAEPGGGSL	G	D	G	R	P	P	E	E	S	A	H	EMMEEEEEIP	0.932597	2.1e-05	54.376	54.376	54.376	-0.0016852	84789000	0.932597	0.687288	NaN	54.376	44.915	NaN
P15170	376	P15170	P15170	Eukaryotic peptide chain release factor GTP-binding subunit ERF3A	GSPT1	NLKIRLKGIEEEEILPGFILCDPNNLCHSGR	1211	P	3	1732		NLKIRLKGIE	E	E	E	I	L	P	G	F	I	L	C	DPNNLCHSGR	0.866636	0.0275723	42.813	35.938	42.813	-2.2483	19538000	0.866636	NaN	NaN	42.813	NaN	NaN
P15170	336	P15170	P15170	Eukaryotic peptide chain release factor GTP-binding subunit ERF3A	GSPT1	LESGSICKGQQLVMMPNKHNVEVLGILSDDV	1212	P	4	1732		LESGSICKGQ	Q	L	V	M	M	P	N	K	H	N	V	EVLGILSDDV	1	4.35e-09	79.018	79.018	79.018	0.89178	53136000	1	0.999999	NaN	79.018	64.318	NaN
P15336	108	P15336	P15336	Cyclic AMP-dependent transcription factor ATF-2	ATF2	ENEFKKASEDDIKKMPLDLSPLATPIIRSKI	1215	P	4	1737		ENEFKKASED	D	I	K	K	M	P	L	D	L	S	P	LATPIIRSKI	0.999975	6.39e-06	92.932	84.744	92.932	0.0035743	183350000	0.999975	NaN	NaN	92.932	NaN	NaN
P15531	72	P15531	P15531	Nucleoside diphosphate kinase A	NME1	DRPFFAGLVKYMHSGPVVAMVWEGLNVVKTG	1216	P	4	1742		DRPFFAGLVK	Y	M	H	S	G	P	V	V	A	M	V	WEGLNVVKTG	1	0.000311647	87.16	82.033	52.061	-0.0039603	9422800000	1	1	1	87.16	68.567	79.97
P15586	66	P15586	P15586	N-acetylglucosamine-6-sulfatase	GNS	LLLTDDQDEVLGGMTPLKKTKALIGEMGMTF	1217	P	4	1744		LLLTDDQDEV	L	G	G	M	T	P	L	K	K	T	K	ALIGEMGMTF	1	2.08e-05	98.199	90.984	98.199	0.15107	643610000	NaN	1	1	NaN	98.199	86.236
P15622	310	P15622	P15622	Zinc finger protein 250	ZNF250	LSHLIQHQRIHTGERPYVCPLCGKAFNHSTV	1218	P	4	1746		LSHLIQHQRI	H	T	G	E	R	P	Y	V	C	P	L	CGKAFNHSTV	0.976952	0.00134101	117.7	74.955	67.115	-0.097503	2622300000	0.5	0.976952	0.888656	47.532	117.7	86.898
P15622	314	P15622	P15622	Zinc finger protein 250	ZNF250	IQHQRIHTGERPYVCPLCGKAFNHSTVLRSH	1219	P	4	1746		IQHQRIHTGE	R	P	Y	V	C	P	L	C	G	K	A	FNHSTVLRSH	0.579407	0.00134101	117.7	74.955	51.546	-0.13001	1954200000	0.5	0.579407	0.5	47.532	117.7	86.898
P15880	62	P15880	P15880	40S ribosomal protein S2	RPS2	GRGARGGKAEDKEWMPVTKLGRLVKDMKIKS	1221	P	2	1750		GRGARGGKAE	D	K	E	W	M	P	V	T	K	L	G	RLVKDMKIKS	1	0.00215075	123.75	100.68	97.813	2.4266	308570000	1	1	1	123.75	97.813	87.568
P15880	253	P15880	P15880	40S ribosomal protein S2	RPS2	KATFDAISKTYSYLTPDLWKETVFTKSPYQE	1222	P	4	1750		KATFDAISKT	Y	S	Y	L	T	P	D	L	W	K	E	TVFTKSPYQE	1	0.000438112	86.131	79.3	65.275	2.5056	1038600000	1	1	1	74.46	86.131	65.275
P15880	265	P15880	P15880	40S ribosomal protein S2	RPS2	YLTPDLWKETVFTKSPYQEFTDHLVKTHTRV	1223	P	4	1750		YLTPDLWKET	V	F	T	K	S	P	Y	Q	E	F	T	DHLVKTHTRV	1	0.000438112	86.131	79.3	65.275	2.5056	1038600000	1	1	1	57.688	86.131	65.275
P15882	13	P15882	P15882	N-chimaerin	CHN1	___MALTLFDTDEYRPPVWKSYLYQLQQEAP	1224	P	2	1751		___MALTLFD	T	D	E	Y	R	P	P	V	W	K	S	YLYQLQQEAP	1	2.91e-05	127.37	101.67	117.23	-0.009361	30835000	1	1	NaN	117.23	127.37	NaN
P15882	14	P15882	P15882	N-chimaerin	CHN1	__MALTLFDTDEYRPPVWKSYLYQLQQEAPH	1225	P	2	1751		__MALTLFDT	D	E	Y	R	P	P	V	W	K	S	Y	LYQLQQEAPH	1	2.91e-05	127.37	101.67	117.23	-0.009361	30835000	1	1	NaN	117.23	127.37	NaN
P15924	2719	P15924	P15924	Desmoplakin	DSP	KKKMSAAEAVKEKWLPYEAGQRFLEFQYLTG	1227	P	4	1755		KKKMSAAEAV	K	E	K	W	L	P	Y	E	A	G	Q	RFLEFQYLTG	0.999999	5.21e-05	68.444	59.557	68.444	-3.9001	64928000	NaN	NaN	0.999999	NaN	NaN	68.444
P15924	2042	P15924	P15924	Desmoplakin	DSP	EKYSLVEAKRKKLISPESTVMLLEAQAATGG	1228	P	5	1755		EKYSLVEAKR	K	K	L	I	S	P	E	S	T	V	M	LLEAQAATGG	1	5.37e-58	186.94	179.23	186.94	-0.2102	3252400000	1	1	1	152.62	92.846	186.94
P15927	222	P15927	P15927	Replication protein A 32 kDa subunit	RPA2	VAQNQVLNLIKACPRPEGLNFQDLKNQLKHM	1229	P	3	1756		VAQNQVLNLI	K	A	C	P	R	P	E	G	L	N	F	QDLKNQLKHM	0.592593	0.0155944	83.729	72.674	83.729	-0.3933	57398000	0.592593	NaN	NaN	83.729	NaN	NaN
P15927	148	P15927	P15927	Replication protein A 32 kDa subunit	RPA2	RSFQNKKSLVAFKIMPLEDMNEFTTHILEVI	1232	P	4	1756		RSFQNKKSLV	A	F	K	I	M	P	L	E	D	M	N	EFTTHILEVI	1	0.000395236	63.029	51.613	42.321	0.45364	1636300000	1	1	NaN	50.857	63.029	NaN
P16104;P20671	49;49	P16104;P20671		Histone H2AX;Histone H2A type 1-D	H2AFX;HIST1H2AD	LLRKGHYAERVGAGAPVYLAAVLEYLTAEIL;LLRKGNYSERVGAGAPVYLAAVLEYLTAEIL	1233	P	3	1760;1898		LLRKGHYAER	V	G	A	G	A	P	V	Y	L	A	A	VLEYLTAEIL	1	0.000379369	84.559	74.395	45.862	4.3436	47264000	NaN	1	1	NaN	53.705	84.559
P16219	377	P16219	P16219	Short-chain specific acyl-CoA dehydrogenase, mitochondrial	ACADS	QAIQILGGMGYVTEMPAERHYRDARITEIYE	1234	P	3	1762		QAIQILGGMG	Y	V	T	E	M	P	A	E	R	H	Y	RDARITEIYE	1	0.000393261	50.492	46.138	50.492	-2.0357	12480000	NaN	1	NaN	NaN	50.492	NaN
P16220	244	P16220	P16220	Cyclic AMP-responsive element-binding protein 1	CREB1	QAASGDVQTYQIRTAPTSTIAPGVVMASSPA	1235	P	2	1763		QAASGDVQTY	Q	I	R	T	A	P	T	S	T	I	A	PGVVMASSPA	0.982306	0.000281111	71.594	53.677	70.091	0.23153	86603000	0.982306	0.831295	0.947941	70.091	68.653	71.594
P16220	250	P16220	P16220	Cyclic AMP-responsive element-binding protein 1	CREB1	VQTYQIRTAPTSTIAPGVVMASSPALPTQPA	1236	P	3	1763		VQTYQIRTAP	T	S	T	I	A	P	G	V	V	M	A	SSPALPTQPA	0.898223	7.07e-05	66.479	55.576	60.029	2.0304	226130000	0	0.898223	0.858305	NaN	60.029	66.479
P16260	275	P16260	P16260	Graves disease carrier protein	SLC25A16	PFDVTRRRMQLGTVLPEFEKCLTMRDTMKYV	1237	P	4	1764		PFDVTRRRMQ	L	G	T	V	L	P	E	F	E	K	C	LTMRDTMKYV	1	0.0101835	47.915	25.194	47.915	-4.4692	5745400	1	NaN	NaN	47.915	NaN	NaN
P16383	511	P16383	P16383	GC-rich sequence DNA-binding factor 2	GCFC2	KLLNPLIRVQLIDWNPLKLESTGLKEMPWFK	1238	P	4	1768		KLLNPLIRVQ	L	I	D	W	N	P	L	K	L	E	S	TGLKEMPWFK	0.97529	0.0070486	53.779	51.585	53.779	-0.47079	44778000	NaN	0.97529	NaN	NaN	53.779	NaN
P16591	454	P16591	P16591	Tyrosine-protein kinase Fer	FER	LGSSALSDMISISEKPLAEQDWYHGAIPRIE	1242	P	4	1776		LGSSALSDMI	S	I	S	E	K	P	L	A	E	Q	D	WYHGAIPRIE	1	0.00323132	40.544	30.383	40.544	-0.017248	43441000	NaN	1	NaN	NaN	40.544	NaN
P16591	466	P16591	P16591	Tyrosine-protein kinase Fer	FER	SEKPLAEQDWYHGAIPRIEAQELLKKQGDFL	1243	P	4	1776		SEKPLAEQDW	Y	H	G	A	I	P	R	I	E	A	Q	ELLKKQGDFL	1	0.00323132	40.544	30.383	40.544	-0.017248	43441000	NaN	1	NaN	NaN	40.544	NaN
P16615	975	P16615	P16615	Sarcoplasmic/endoplasmic reticulum calcium ATPase 2	ATP2A2	PLNVTQWLMVLKISLPVILMDETLKFVARNY	1244	P	2	1777		PLNVTQWLMV	L	K	I	S	L	P	V	I	L	M	D	ETLKFVARNY	1	0.026372	64.04	6.0804	64.04	-3.2149	0	NaN	NaN	1	NaN	NaN	64.04
P16989	272	P16989	P16989	Y-box-binding protein 3	YBX3	NRIQAGEIGEMKDGVPEGAQLQGPVHRNPTY	1248	P	4	1782		NRIQAGEIGE	M	K	D	G	V	P	E	G	A	Q	L	QGPVHRNPTY	0.999359	0.00559899	48.867	34.995	48.867	-2.0227	89195000	0.999359	NaN	NaN	48.867	NaN	NaN
P16989	35	P16989	P16989	Y-box-binding protein 3	YBX3	TEAAAAAPQDPAPKSPVGSGAPQAAAPAPAA	1249	P	4	1782		TEAAAAAPQD	P	A	P	K	S	P	V	G	S	G	A	PQAAAPAPAA	0.850519	6.67e-16	71.831	64.965	71.831	-1.5185	740760000	0.635423	NaN	0.850519	48.915	NaN	71.831
P16989	41	P16989	P16989	Y-box-binding protein 3	YBX3	APQDPAPKSPVGSGAPQAAAPAPAAHVAGNP	1250	P	4	1782		APQDPAPKSP	V	G	S	G	A	P	Q	A	A	A	P	APAAHVAGNP	0.961691	6.67e-16	71.831	64.965	71.831	-1.5185	740760000	0.870968	NaN	0.961691	48.915	NaN	71.831
P16989	46	P16989	P16989	Y-box-binding protein 3	YBX3	APKSPVGSGAPQAAAPAPAAHVAGNPGGDAA	1251	P	4	1782		APKSPVGSGA	P	Q	A	A	A	P	A	P	A	A	H	VAGNPGGDAA	0.961691	6.67e-16	71.831	64.965	71.831	-1.5185	740760000	0.952729	NaN	0.961691	48.915	NaN	71.831
P16989	48	P16989	P16989	Y-box-binding protein 3	YBX3	KSPVGSGAPQAAAPAPAAHVAGNPGGDAAPA	1252	P	4	1782		KSPVGSGAPQ	A	A	A	P	A	P	A	A	H	V	A	GNPGGDAAPA	0.961691	6.67e-16	71.831	64.965	71.831	-1.5185	740760000	0.952729	NaN	0.961691	48.915	NaN	71.831
P16989	56	P16989	P16989	Y-box-binding protein 3	YBX3	PQAAAPAPAAHVAGNPGGDAAPAATGTAAAA	1253	P	4	1782		PQAAAPAPAA	H	V	A	G	N	P	G	G	D	A	A	PAATGTAAAA	0.961691	6.67e-16	71.831	64.965	71.831	-1.5185	740760000	0.952729	NaN	0.961691	48.915	NaN	71.831
P16989	62	P16989	P16989	Y-box-binding protein 3	YBX3	APAAHVAGNPGGDAAPAATGTAAAASLATAA	1254	P	4	1782		APAAHVAGNP	G	G	D	A	A	P	A	A	T	G	T	AAAASLATAA	0.635423	5.7e-07	48.915	44.842	48.915	-2.088	562560000	0.635423	NaN	NaN	48.915	NaN	NaN
P16989	256	P16989	P16989	Y-box-binding protein 3	YBX3	HVGQTFDRRSRVLPHPNRIQAGEIGEMKDGV	1255	P	5	1782		HVGQTFDRRS	R	V	L	P	H	P	N	R	I	Q	A	GEIGEMKDGV	0.838795	6.53e-05	56.021	46.521	56.021	0.01239	286760000	NaN	NaN	0.838795	NaN	NaN	56.021
P17098	552	P17098	P17098	Zinc finger protein 8	ZNF8	ALALFDIQKIMQEKNPVHVIGVEEPSVGASM	1256	P	4	1800		ALALFDIQKI	M	Q	E	K	N	P	V	H	V	I	G	VEEPSVGASM	0.999507	0.000113066	98.812	98.812	74.274	-0.70183	55898000	NaN	0.999507	0.999366	NaN	74.274	98.812
P17098	3	P17098	P17098	Zinc finger protein 8	ZNF8	_____________MDPEDEGVAGVMSVGPPA	1257	P	2	1800		__________	_	_	_	M	D	P	E	D	E	G	V	AGVMSVGPPA	1	5.25e-05	91.441	71.234	91.441	-1.8274	0	1	NaN	NaN	91.441	NaN	NaN
P17174	348	P17174	P17174	Aspartate aminotransferase, cytoplasmic	GOT1	TMRSELRARLEALKTPGTWNHITDQIGMFSF	1258	P	3	1802		TMRSELRARL	E	A	L	K	T	P	G	T	W	N	H	ITDQIGMFSF	0.999582	0.00183983	50.189	44.409	50.189	-3.2428	0	0.999582	NaN	NaN	50.189	NaN	NaN
P17535	33	P17535	P17535	Transcription factor jun-D	JUND	ASGSGGSFASPGRLFPGAPPTAAAGSMMKKD	1260	P	2	1814		ASGSGGSFAS	P	G	R	L	F	P	G	A	P	P	T	AAAGSMMKKD	1	0.00494092	48.741	18.997	48.741	1.1067	19413000	1	NaN	NaN	48.741	NaN	NaN
P17535	36	P17535	P17535	Transcription factor jun-D	JUND	SGGSFASPGRLFPGAPPTAAAGSMMKKDALT	1261	P	2	1814		SGGSFASPGR	L	F	P	G	A	P	P	T	A	A	A	GSMMKKDALT	1	0.00494092	48.741	18.997	48.741	1.1067	19413000	1	NaN	NaN	48.741	NaN	NaN
P17535	37	P17535	P17535	Transcription factor jun-D	JUND	GGSFASPGRLFPGAPPTAAAGSMMKKDALTL	1262	P	2	1814		GGSFASPGRL	F	P	G	A	P	P	T	A	A	A	G	SMMKKDALTL	1	0.00494092	48.741	18.997	48.741	1.1067	19413000	1	NaN	NaN	48.741	NaN	NaN
P17655	639	P17655	P17655	Calpain-2 catalytic subunit	CAPN2	SYEMRKALEEAGFKMPCQLHQVIVARFADDQ	1265	P	4	1818		SYEMRKALEE	A	G	F	K	M	P	C	Q	L	H	Q	VIVARFADDQ	1	0.000638685	73.138	65.035	73.138	0.86319	132780000	NaN	1	NaN	NaN	73.138	NaN
P17812	437	P17812	P17812	CTP synthase 1	CTPS1	TEFDPTTSHPVVVDMPEHNPGQMGGTMRLGK	1266	P	4	1823		TEFDPTTSHP	V	V	V	D	M	P	E	H	N	P	G	QMGGTMRLGK	0.745056	1.35e-06	51.868	51.868	51.868	-0.47756	23715000	0.745056	0	NaN	51.868	NaN	NaN
P17844;Q92841	271;348	P17844;Q92841	P17844	Probable ATP-dependent RNA helicase DDX5;Probable ATP-dependent RNA helicase DDX17	DDX5;DDX17	MGFEPQIRKIVDQIRPDRQTLMWSATWPKEV	1268	P	4	1824;6468		MGFEPQIRKI	V	D	Q	I	R	P	D	R	Q	T	L	MWSATWPKEV	0.999926	0.00695608	60.034	41.315	60.034	-0.32552	125760000	0.999926	NaN	NaN	60.034	NaN	NaN
P17858	329	P17858	P17858	ATP-dependent 6-phosphofructokinase, liver type	PFKL	SKMGMEAVMALLEATPDTPACVVTLSGNQSV	1270	P	3	1825		SKMGMEAVMA	L	L	E	A	T	P	D	T	P	A	C	VVTLSGNQSV	0.975183	0.000472474	51.296	51.296	51.296	-0.50122	27884000	0.975183	NaN	NaN	51.296	NaN	NaN
P17987	226	P17987	P17987	T-complex protein 1 subunit alpha	TCP1	ISGYALNCVVGSQGMPKRIVNAKIACLDFSL	1274	P	4	1830		ISGYALNCVV	G	S	Q	G	M	P	K	R	I	V	N	AKIACLDFSL	1	0.000116486	63.491	60.952	63.491	1.1154	39895000	NaN	NaN	1	NaN	NaN	63.491
P17987	4	P17987	P17987	T-complex protein 1 subunit alpha	TCP1	____________MEGPLSVFGDRSTGETIRS	1275	P	4	1830		__________	_	_	M	E	G	P	L	S	V	F	G	DRSTGETIRS	1	0.000576499	44.615	39.349	44.615	1.4084	17060000	1	NaN	NaN	44.615	NaN	NaN
P17987	38	P17987	P17987	T-complex protein 1 subunit alpha	TCP1	MAAASIANIVKSSLGPVGLDKMLVDDIGDVT	1276	P	3	1830		MAAASIANIV	K	S	S	L	G	P	V	G	L	D	K	MLVDDIGDVT	1	5.21e-12	92.822	87.162	75.141	-1.5393	3961000000	1	1	1	81.534	92.822	78.216
P18031	89	P18031	P18031	Tyrosine-protein phosphatase non-receptor type 1	PTPN1	MEEAQRSYILTQGPLPNTCGHFWEMVWEQKS	1277	P	3	1831		MEEAQRSYIL	T	Q	G	P	L	P	N	T	C	G	H	FWEMVWEQKS	0.795321	0.0112011	48.641	42.413	48.641	-2.192	59554000	NaN	NaN	0.795321	NaN	NaN	48.641
P18206	15	P18206	P18206	Vinculin	VCL	_MPVFHTRTIESILEPVAQQISHLVIMHEEG	1279	P	3	1840		_MPVFHTRTI	E	S	I	L	E	P	V	A	Q	Q	I	SHLVIMHEEG	1	0.0108758	69.981	54.701	69.981	-0.10586	16061000	NaN	1	NaN	NaN	69.981	NaN
P18621	143	P18621	P18621	60S ribosomal protein L17	RPL17	RTYRAHGRINPYMSSPCHIEMILTEKEQIVP	1282	P	3	1845		RTYRAHGRIN	P	Y	M	S	S	P	C	H	I	E	M	ILTEKEQIVP	0.999845	0.000306433	95.741	91.164	95.741	-0.069639	937070000	0	0.998326	0.999845	NaN	92.865	95.741
P18669;Q8N0Y7	165;165	P18669	P18669	Phosphoglycerate mutase 1;Probable phosphoglycerate mutase 4	PGAM1;PGAM4	LPSCESLKDTIARALPFWNEEIVPQIKEGKR	1283	P	2	1846		LPSCESLKDT	I	A	R	A	L	P	F	W	N	E	E	IVPQIKEGKR	0.999998	0.0134544	129.88	96.789	125.23	-0.66824	556110000	NaN	0.999998	0.999996	NaN	129.88	103.01
P18669	32	P18669	P18669	Phosphoglycerate mutase 1	PGAM1	NLENRFSGWYDADLSPAGHEEAKRGGQALRD	1284	P	5	1846		NLENRFSGWY	D	A	D	L	S	P	A	G	H	E	E	AKRGGQALRD	1	0.00104798	49.088	40.023	49.088	-0.97767	144670000	1	1	1	47.647	44.6	49.088
P18669	226	P18669	P18669	Phosphoglycerate mutase 1	PGAM1	PTGIPIVYELDKNLKPIKPMQFLGDEETVRK	1285	P	3	1846		PTGIPIVYEL	D	K	N	L	K	P	I	K	P	M	Q	FLGDEETVRK	1	5.31e-05	127.75	127.75	66.673	-1.9172	6415300000	0.550943	1	1	90.754	108.34	127.75
P18669;Q8N0Y7	128;128	P18669	P18669	Phosphoglycerate mutase 1;Probable phosphoglycerate mutase 4	PGAM1;PGAM4	KIWRRSYDVPPPPMEPDHPFYSNISKDRRYA	1290	P	5	1846		KIWRRSYDVP	P	P	P	M	E	P	D	H	P	F	Y	SNISKDRRYA	0.811741	3.81e-06	87.117	84.339	57.278	-0.47678	923420000	0.801155	0.811741	0.795655	74.251	78.413	87.117
P18669	151	P18669	P18669	Phosphoglycerate mutase 1	PGAM1	ISKDRRYADLTEDQLPSCESLKDTIARALPF	1292	P	2	1846		ISKDRRYADL	T	E	D	Q	L	P	S	C	E	S	L	KDTIARALPF	1	0.00147451	144.17	99.56	105.46	1.6565	2432400000	1	1	1	144.17	107.11	119.27
P19022	813	P19022	P19022	Cadherin-2	CDH2	PDAIKPVGIRRMDERPIHAEPQYPVRSAAPH	1296	P	4	1857		PDAIKPVGIR	R	M	D	E	R	P	I	H	A	E	P	QYPVRSAAPH	0.99972	0.00120195	77.146	64.861	77.146	-0.05279	131190000	0.998497	NaN	0.99972	45.434	NaN	77.146
P19338	647	P19338	P19338	Nucleolin	NCL	DGEIDGNKVTLDWAKPKGEGGFGGRGGGRGG	1298	P	4	1861		DGEIDGNKVT	L	D	W	A	K	P	K	G	E	G	G	FGGRGGGRGG	1	0.00185157	73.881	61.735	56.055	-0.5565	405190000	1	1	1	56.055	73.315	73.881
P19338	321	P19338	P19338	Nucleolin	NCL	AFNLFVGNLNFNKSAPELKTGISDVFAKNDL	1299	P	2	1861		AFNLFVGNLN	F	N	K	S	A	P	E	L	K	T	G	ISDVFAKNDL	1	9.43e-13	130.39	108.73	130.39	2.6706	0	1	NaN	NaN	130.39	NaN	NaN
P19525	457	P19525	P19525	Interferon-induced, double-stranded RNA-activated protein kinase	EIF2AK2	DGKRTRSKGTLRYMSPEQISSQDYGKEVDLY	1301	P	3	1871		DGKRTRSKGT	L	R	Y	M	S	P	E	Q	I	S	S	QDYGKEVDLY	1	0.0337216	55.841	51.45	55.841	-0.95538	4128600	NaN	NaN	1	NaN	NaN	55.841
P19623	29	P19623	P19623	Spermidine synthase	SRM	AAIREGWFRETCSLWPGQALSLQVEQLLHHR	1302	P	5	1876		AAIREGWFRE	T	C	S	L	W	P	G	Q	A	L	S	LQVEQLLHHR	1	7.61e-05	69.398	63.035	69.398	1.3443	29345000	1	NaN	NaN	69.398	NaN	NaN
P19784	323	P19784	P19784	Casein kinase II subunit alpha'	CSNK2A2	YDHQQRLTAKEAMEHPYFYPVVKEQSQPCAD	1304	P	4	1878		YDHQQRLTAK	E	A	M	E	H	P	Y	F	Y	P	V	VKEQSQPCAD	0.99079	3.41e-15	141.73	134.53	141.73	0.17043	513430000	0.980232	0.99079	0.855156	76.669	141.73	63.776
P19784	335	P19784	P19784	Casein kinase II subunit alpha'	CSNK2A2	MEHPYFYPVVKEQSQPCADNAVLSSGLTAAR	1305	P	3	1878		MEHPYFYPVV	K	E	Q	S	Q	P	C	A	D	N	A	VLSSGLTAAR	1	0.0027552	77.754	70.311	48.656	0.78951	73569000	1	0	0	77.754	NaN	NaN
P19793	287	P19793	P19793	Retinoic acid receptor RXR-alpha	RXRA	ADKQLFTLVEWAKRIPHFSELPLDDQVILLR	1306	P	4	1879		ADKQLFTLVE	W	A	K	R	I	P	H	F	S	E	L	PLDDQVILLR	1	0.0201148	59.261	31.765	51.147	-1.6177	698290000	NaN	1	1	NaN	59.261	51.147
P19793	293	P19793	P19793	Retinoic acid receptor RXR-alpha	RXRA	TLVEWAKRIPHFSELPLDDQVILLRAGWNEL	1307	P	4	1879		TLVEWAKRIP	H	F	S	E	L	P	L	D	D	Q	V	ILLRAGWNEL	1	0.0201148	59.261	31.765	51.147	-1.6177	698290000	NaN	1	1	NaN	59.261	51.147
P20020	1148	P20020	P20020	Plasma membrane calcium-transporting ATPase 1	ATP2B1	EKPESRSSIHNFMTHPEFRIEDSEPHIPLID	1308	P	5	1881		EKPESRSSIH	N	F	M	T	H	P	E	F	R	I	E	DSEPHIPLID	0.947216	4.53e-09	92.206	88.171	62.605	-0.3291	121130000	0.497852	0.947216	0	77.825	92.206	NaN
P20020	1157	P20020	P20020	Plasma membrane calcium-transporting ATPase 1	ATP2B1	HNFMTHPEFRIEDSEPHIPLIDDTDAEDDAP	1309	P	5	1881		HNFMTHPEFR	I	E	D	S	E	P	H	I	P	L	I	DDTDAEDDAP	0.53508	4.4e-08	77.825	76.517	76.976	-0.62042	37676000	0.497852	NaN	0.53508	77.825	NaN	76.976
P20265	23	P20265	P20265	POU domain, class 3, transcription factor 2	POU3F2	HYSLLTSSASIVHAEPPGGMQQGAGGYREAQ	1312	P	3	1887		HYSLLTSSAS	I	V	H	A	E	P	P	G	G	M	Q	QGAGGYREAQ	0.526643	6.58e-08	71.903	66.743	71.903	0.23371	20933000	0.526643	NaN	0.518361	71.903	NaN	50.261
P20290	23	P20290	P20290	Transcription factor BTF3	BTF3	AQADSRGRGRARGGCPGGEATLSQPPPRGGT	1313	P	3	1888		AQADSRGRGR	A	R	G	G	C	P	G	G	E	A	T	LSQPPPRGGT	0.999997	0.0203841	61.477	57.698	61.477	-0.54127	54636000	0.999997	NaN	NaN	61.477	NaN	NaN
P20618	175	P20618	P20618	Proteasome subunit beta type-1	PSMB1	RDSFKAGGSASAMLQPLLDNQVGFKNMQNVE	1315	P	3	1896		RDSFKAGGSA	S	A	M	L	Q	P	L	L	D	N	Q	VGFKNMQNVE	0.989949	3.07e-06	66.083	55.845	66.083	1.217	29478000	0.989949	NaN	NaN	66.083	NaN	NaN
P20645	224	P20645	P20645	Cation-dependent mannose-6-phosphate receptor	M6PR	LYQRLVVGAKGMEQFPHLAFWQDLGNLVADG	1316	P	3	1897		LYQRLVVGAK	G	M	E	Q	F	P	H	L	A	F	W	QDLGNLVADG	1	0.00193892	55.67	53.467	55.67	-2.4208	163700000	NaN	1	NaN	NaN	55.67	NaN
P20810	662	P20810	P20810	Calpastatin	CAST	DQDPIDALSGDLDSCPSTTETSQNTAKDKCK	1319	P	3	1902		DQDPIDALSG	D	L	D	S	C	P	S	T	T	E	T	SQNTAKDKCK	0.996157	0.001078	61.958	59.953	61.958	0.065283	35608000	0.996157	NaN	NaN	61.958	NaN	NaN
P20839	181	P20839	P20839	Inosine-5'-monophosphate dehydrogenase 1	IMPDH1	LAEKDHTTLLSEVMTPRIELVVAPAGVTLKE	1322	P	4	1903		LAEKDHTTLL	S	E	V	M	T	P	R	I	E	L	V	VAPAGVTLKE	1	1.04e-19	151.31	140.98	83.834	0.51049	2190300000	1	1	1	89.668	151.31	129.02
P21281	352	P21281	P21281	V-type proton ATPase subunit B, brain isoform	ATP6V1B2	RAGRVEGRNGSITQIPILTMPNDDITHPIPD	1327	P	3	1910		RAGRVEGRNG	S	I	T	Q	I	P	I	L	T	M	P	NDDITHPIPD	0.894352	5.54e-07	98.683	90.684	98.683	2.4311	85778000	0.894352	0.86744	NaN	98.683	93.437	NaN
P21333	2545	P21333	P21333	Filamin-A	FLNA	TSSVFVDSLTKATCAPQHGAPGPGPADASKV	1328	P	2	1913		TSSVFVDSLT	K	A	T	C	A	P	Q	H	G	A	P	GPGPADASKV	0.999886	0.000959669	101.62	91.014	101.62	-0.099596	1787200000	0.999886	0.999547	0.999683	101.62	78.794	71.742
P21333	1251	P21333	P21333	Filamin-A	FLNA	GGQPVPNFPSKLQVEPAVDTSGVQCYGPGIE	1329	P	3	1913		GGQPVPNFPS	K	L	Q	V	E	P	A	V	D	T	S	GVQCYGPGIE	0.95597	0.01995	40.756	37.822	40.756	0.59205	7832900	0.95597	NaN	NaN	40.756	NaN	NaN
P21333	667	P21333	P21333	Filamin-A	FLNA	EDIRLSPFMADIRDAPQDFHPDRVKARGPGL	1331	P	5	1913		EDIRLSPFMA	D	I	R	D	A	P	Q	D	F	H	P	DRVKARGPGL	0.953121	0.00881179	49.089	41.555	49.089	-2.8362	45535000	0.953121	NaN	NaN	49.089	NaN	NaN
P21333	480	P21333	P21333	Filamin-A	FLNA	IPRSPYTVTVGQACNPSACRAVGRGLQPKGV	1332	P	2	1913		IPRSPYTVTV	G	Q	A	C	N	P	S	A	C	R	A	VGRGLQPKGV	1	0.0047582	110.08	102.35	110.08	-0.33789	76355000	1	NaN	NaN	110.08	NaN	NaN
P21359	1463	P21359	P21359	Neurofibromin;Neurofibromin truncated	NF1	SIANHVLFTKEEHMRPFNDFVKSNFDAARRF	1333	P	5	1914		SIANHVLFTK	E	E	H	M	R	P	F	N	D	F	V	KSNFDAARRF	1	0.00145064	56.681	56.681	56.681	-0.33889	140660000	NaN	1	1	NaN	45.972	56.681
P21399	349	P21399	P21399	Cytoplasmic aconitate hydratase	ACO1	KKYLQAVGMFRDFNDPSQDPDFTQVVELDLK	1334	P	3	1916		KKYLQAVGMF	R	D	F	N	D	P	S	Q	D	P	D	FTQVVELDLK	0.882598	0.00136905	61.732	56.188	61.732	-1.1008	26265000	0.882598	NaN	NaN	61.732	NaN	NaN
P21675	552	P21675	P21675	Transcription initiation factor TFIID subunit 1	TAF1	KSRILLGKTGVIKEEPQQNMSQPEVKDPWNL	1335	P	4	1918		KSRILLGKTG	V	I	K	E	E	P	Q	Q	N	M	S	QPEVKDPWNL	0.988374	0.00239762	48.204	44.091	48.204	-0.58552	10872000	NaN	NaN	0.988374	NaN	NaN	48.204
P21912	129	P21912	P21912	Succinate dehydrogenase [ubiquinone] iron-sulfur subunit, mitochondrial	SDHB	TRRIDTNLNKVSKIYPLPHMYVIKDLVPDLS	1337	P	4	1923		TRRIDTNLNK	V	S	K	I	Y	P	L	P	H	M	Y	VIKDLVPDLS	0.81191	5.52e-05	82.849	76.568	48.182	-2.4083	2187000000	0.808757	0.81191	0.557716	52.359	73.341	82.849
P21964	109	P21964	P21964	Catechol O-methyltransferase	COMT	DKKGKIVDAVIQEHQPSVLLELGAYCGYSAV	1340	P	3	1926		DKKGKIVDAV	I	Q	E	H	Q	P	S	V	L	L	E	LGAYCGYSAV	1	0.0156395	41.087	32.908	41.087	-0.50432	19915000	NaN	1	NaN	NaN	41.087	NaN
P21964	224	P21964	P21964	Catechol O-methyltransferase	COMT	LLRKGTVLLADNVICPGAPDFLAHVRGSSCF	1341	P	4	1926		LLRKGTVLLA	D	N	V	I	C	P	G	A	P	D	F	LAHVRGSSCF	0.995743	3.77e-06	89.511	76.833	66.853	0.1501	702150000	0.98047	0.995743	0.99354	64.488	89.511	58.373
P21964	143	P21964	P21964	Catechol O-methyltransferase	COMT	RLLSPGARLITIEINPDCAAITQRMVDFAGV	1342	P	2	1926		RLLSPGARLI	T	I	E	I	N	P	D	C	A	A	I	TQRMVDFAGV	1	0.00851542	106.67	93.467	89.805	-0.79958	62406000	NaN	1	1	NaN	106.67	89.805
P22059	437	P22059	P22059	Oxysterol-binding protein 1	OSBP	IMKNCIGKELSKIPMPVNFNEPLSMLQRLTE	1344	P	3	1928		IMKNCIGKEL	S	K	I	P	M	P	V	N	F	N	E	PLSMLQRLTE	0.804827	0.000503452	97.69	78.403	79.508	-0.79487	84079000	0.804827	0.494748	0.360263	79.508	97.69	59.469
P22061	185	P22061	P22061	Protein-L-isoaspartate(D-aspartate) O-methyltransferase	PCMT1	IDQLKPGGRLILPVGPAGGNQMLEQYDKLQD	1346	P	3	1929		IDQLKPGGRL	I	L	P	V	G	P	A	G	G	N	Q	MLEQYDKLQD	0.831416	0.00363546	70.569	59.464	63.337	1.9585	8961400000	0.554468	NaN	0.831416	70.569	NaN	63.337
P22087	90	P22087	P22087	rRNA 2'-O-methyltransferase fibrillarin	FBL	GGKRGNQSGKNVMVEPHRHEGVFICRGKEDA	1348	P	4	1931		GGKRGNQSGK	N	V	M	V	E	P	H	R	H	E	G	VFICRGKEDA	1	0.0124173	48.899	38.554	48.899	-1.0939	354470000	NaN	1	NaN	NaN	48.899	NaN
P22102	487	P22102	P22102	Trifunctional purine biosynthetic protein adenosine-3;Phosphoribosylamine--glycine ligase;Phosphoribosylformylglycinamidine cyclo-ligase;Phosphoribosylglycinamide formyltransferase	GART	GFAGLFDLKAAGFKDPLLASGTDGVGTKLKI	1349	P	3	1932		GFAGLFDLKA	A	G	F	K	D	P	L	L	A	S	G	TDGVGTKLKI	1	0.0239847	57.482	46.824	57.482	2.3601	15254000	1	NaN	NaN	57.482	NaN	NaN
P22102	238	P22102	P22102	Trifunctional purine biosynthetic protein adenosine-3;Phosphoribosylamine--glycine ligase;Phosphoribosylformylglycinamidine cyclo-ligase;Phosphoribosylglycinamide formyltransferase	GART	EGDGGPNTGGMGAYCPAPQVSNDLLLKIKDT	1350	P	3	1932		EGDGGPNTGG	M	G	A	Y	C	P	A	P	Q	V	S	NDLLLKIKDT	0.779039	0.000575213	51.566	49.302	51.566	-1.0597	26879000	0.779039	NaN	NaN	51.566	NaN	NaN
P22102	96	P22102	P22102	Trifunctional purine biosynthetic protein adenosine-3;Phosphoribosylamine--glycine ligase;Phosphoribosylformylglycinamidine cyclo-ligase;Phosphoribosylglycinamide formyltransferase	GART	GIVGNLRSAGVQCFGPTAEAAQLESSKRFAK	1351	P	3	1932		GIVGNLRSAG	V	Q	C	F	G	P	T	A	E	A	A	QLESSKRFAK	1	8.81e-06	104.45	96.06	48.229	2.1937	445780000	1	1	1	104.45	56.529	64.203
P22102	268	P22102	P22102	Trifunctional purine biosynthetic protein adenosine-3;Phosphoribosylamine--glycine ligase;Phosphoribosylformylglycinamidine cyclo-ligase;Phosphoribosylglycinamide formyltransferase	GART	TVLQRTVDGMQQEGTPYTGILYAGIMLTKNG	1354	P	3	1932		TVLQRTVDGM	Q	Q	E	G	T	P	Y	T	G	I	L	YAGIMLTKNG	1	0.00565649	49.287	42.923	47.52	-1.4175	84457000	NaN	1	1	NaN	47.52	49.287
P22234	138	P22234	P22234	Multifunctional protein ADE2;Phosphoribosylaminoimidazole-succinocarboxamide synthase;Phosphoribosylaminoimidazole carboxylase	PAICS	PPKVELFFKDDANNDPQWSEEQLIAAKFCFA	1355	P	2	1933		PPKVELFFKD	D	A	N	N	D	P	Q	W	S	E	E	QLIAAKFCFA	1	0.0143427	64.565	53.621	64.565	-3.2746	0	1	NaN	NaN	64.565	NaN	NaN
P22307	542	P22307	P22307	Non-specific lipid-transfer protein	SCP2	GNMGLAMKLQNLQLQPGNAKL__________	1356	P	2	1935		GNMGLAMKLQ	N	L	Q	L	Q	P	G	N	A	K	L	__________	1	0.00940002	81.594	62.463	81.594	-0.31212	0	NaN	NaN	1	NaN	NaN	81.594
P22307	5	P22307	P22307	Non-specific lipid-transfer protein	SCP2	___________MSSSPWEPATLRRVFVVGVG	1357	P	2	1935		__________	_	M	S	S	S	P	W	E	P	A	T	LRRVFVVGVG	1	0.00463625	57.785	15.449	57.785	1.4528	37141000	NaN	1	NaN	NaN	57.785	NaN
P22307	8	P22307	P22307	Non-specific lipid-transfer protein	SCP2	________MSSSPWEPATLRRVFVVGVGMTK	1358	P	2	1935		________MS	S	S	P	W	E	P	A	T	L	R	R	VFVVGVGMTK	1	0.00463625	57.785	15.449	57.785	1.4528	37141000	NaN	1	NaN	NaN	57.785	NaN
P22314	846	P22314	P22314	Ubiquitin-like modifier-activating enzyme 1	UBA1	ATLPSPDKLPGFKMYPIDFEKDDDSNFHMDF	1360	P	5	1936		ATLPSPDKLP	G	F	K	M	Y	P	I	D	F	E	K	DDDSNFHMDF	0.999996	4.39e-09	72.113	68.738	72.113	-1.2167	171330000	NaN	0.999996	0.999992	NaN	72.113	68.907
P22314	659	P22314	P22314	Ubiquitin-like modifier-activating enzyme 1	UBA1	TLQWARDEFEGLFKQPAENVNQYLTDPKFVE	1361	P	3	1936		TLQWARDEFE	G	L	F	K	Q	P	A	E	N	V	N	QYLTDPKFVE	0.980559	0.0126197	47.191	39.875	47.191	-3.8819	19250000	NaN	NaN	0.980559	NaN	NaN	47.191
P22314	37	P22314	P22314	Ubiquitin-like modifier-activating enzyme 1	UBA1	NCSPAQSVLSEVPSVPTNGMAKNGSEADIDE	1362	P	3	1936		NCSPAQSVLS	E	V	P	S	V	P	T	N	G	M	A	KNGSEADIDE	0.792513	0.0240772	41.763	36.057	41.763	0.19148	7660800	NaN	NaN	0.792513	NaN	NaN	41.763
P22314	272	P22314	P22314	Ubiquitin-like modifier-activating enzyme 1	UBA1	VELNGNQPMEIKVLGPYTFSICDTSNFSDYI	1363	P	3	1936		VELNGNQPME	I	K	V	L	G	P	Y	T	F	S	I	CDTSNFSDYI	1	0.00742489	56.936	54.581	56.936	-0.81318	4100100	1	NaN	NaN	56.936	NaN	NaN
P22392	136	P22392	P22392	Nucleoside diphosphate kinase B	NME2	DSVKSAEKEISLWFKPEELVDYKSCAHDWVY	1364	P	4	1937		DSVKSAEKEI	S	L	W	F	K	P	E	E	L	V	D	YKSCAHDWVY	1	5.04e-05	83.423	67.449	45.347	-0.18329	630900000	1	1	1	75.533	83.423	57.496
P22570	344	P22570	P22570	NADPH:adrenodoxin oxidoreductase, mitochondrial	FDXR	AVTRLEGVDEATRAVPTGDMEDLPCGLVLSS	1365	P	2	1942		AVTRLEGVDE	A	T	R	A	V	P	T	G	D	M	E	DLPCGLVLSS	0.999996	2.58e-18	161.84	139.61	161.84	-0.086187	150700000	0.999982	0.999996	0.996812	114.69	161.84	70.281
P22626	83	P22626	P22626	Heterogeneous nuclear ribonucleoproteins A2/B1	HNRNPA2B1	TFSSMAEVDAAMAARPHSIDGRVVEPKRAVA	1367	P	4	1945		TFSSMAEVDA	A	M	A	A	R	P	H	S	I	D	G	RVVEPKRAVA	1	1.01e-19	139.16	117.39	69.782	-0.035231	48418000000	1	1	1	139.16	122.73	111.68
P22626	93	P22626	P22626	Heterogeneous nuclear ribonucleoproteins A2/B1	HNRNPA2B1	AMAARPHSIDGRVVEPKRAVAREESGKPGAH	1368	P	4	1945		AMAARPHSID	G	R	V	V	E	P	K	R	A	V	A	REESGKPGAH	0.558591	0.000850418	49.445	49.445	49.445	-0.6322	66130000	0.558591	NaN	NaN	49.445	NaN	NaN
P22626	223	P22626	P22626	Heterogeneous nuclear ribonucleoproteins A2/B1	HNRNPA2B1	GFGDSRGGGGNFGPGPGSNFRGGSDGYGSGR	1370	P	2	1945		GFGDSRGGGG	N	F	G	P	G	P	G	S	N	F	R	GGSDGYGSGR	0.893428	0.0116234	108.77	98.245	93.839	2.3202	44430000	NaN	0.893428	0.881193	NaN	93.839	108.77
P22626	330	P22626	P22626	Heterogeneous nuclear ribonucleoproteins A2/B1	HNRNPA2B1	PMKSGNFGGSRNMGGPYGGGNYGPGGSGGSG	1372	P	2	1945		PMKSGNFGGS	R	N	M	G	G	P	Y	G	G	G	N	YGPGGSGGSG	1	2e-05	99.957	99.932	94.487	-4.3281	11409000000	1	0.999964	1	99.957	84.874	94.487
P22626	338	P22626	P22626	Heterogeneous nuclear ribonucleoproteins A2/B1	HNRNPA2B1	GSRNMGGPYGGGNYGPGGSGGSGGYGGRSRY	1373	P	2	1945		GSRNMGGPYG	G	G	N	Y	G	P	G	G	S	G	G	SGGYGGRSRY	1	0.000609378	94.487	90.691	94.487	-4.3281	8677000	0	0	1	NaN	NaN	94.487
P22681	703	P22681	P22681	E3 ubiquitin-protein ligase CBL	CBL	PGEQCEGEEDTEYMTPSSRPLRPLDTSQSSR	1374	P	4	1947		PGEQCEGEED	T	E	Y	M	T	P	S	S	R	P	L	RPLDTSQSSR	0.76921	1.06e-06	64.686	60.452	64.686	-0.14234	170310000	NaN	0.76921	NaN	NaN	64.686	NaN
P22695	193	P22695	P22695	Cytochrome b-c1 complex subunit 2, mitochondrial	UQCRC2	HAAAYRNALANPLYCPDYRIGKVTSEELHYF	1375	P	2	1949		HAAAYRNALA	N	P	L	Y	C	P	D	Y	R	I	G	KVTSEELHYF	0.998304	0.0205368	128.91	95.035	125.75	-0.1367	142630000	NaN	0.998304	0.979526	NaN	125.75	128.91
P22830	192	P22830	P22830	Ferrochelatase, mitochondrial	FECH	MERDGLERAIAFTQYPQYSCSTTGSSLNAIY	1376	P	3	1950		MERDGLERAI	A	F	T	Q	Y	P	Q	Y	S	C	S	TTGSSLNAIY	1	0.00377065	55.128	52.141	55.128	0.32299	7053900	1	NaN	NaN	55.128	NaN	NaN
P22830	309	P22830	P22830	Ferrochelatase, mitochondrial	FECH	CNPYRLVWQSKVGPMPWLGPQTDESIKGLCE	1378	P	3	1950		CNPYRLVWQS	K	V	G	P	M	P	W	L	G	P	Q	TDESIKGLCE	0.998878	9.27e-06	88.396	70.08	81.665	-1.4918	275360000	0.998475	0.998878	NaN	88.396	81.665	NaN
P22830	313	P22830	P22830	Ferrochelatase, mitochondrial	FECH	RLVWQSKVGPMPWLGPQTDESIKGLCERGRK	1379	P	3	1950		RLVWQSKVGP	M	P	W	L	G	P	Q	T	D	E	S	IKGLCERGRK	0.952736	9.27e-06	88.396	70.08	54.117	-2.5921	260490000	0.638062	0.924987	0.952736	88.396	81.665	54.117
P23229	469	P23229	P23229	Integrin alpha-6;Integrin alpha-6 heavy chain;Integrin alpha-6 light chain;Processed integrin alpha-6	ITGA6	NGINTKPTQVLKGISPYFGYSIAGNMDLDRN	1381	P	4	1954		NGINTKPTQV	L	K	G	I	S	P	Y	F	G	Y	S	IAGNMDLDRN	0.849447	4.35e-06	52.155	47.298	52.155	-0.78022	48026000	NaN	0.849447	NaN	NaN	52.155	NaN
P23229	105	P23229	P23229	Integrin alpha-6;Integrin alpha-6 heavy chain;Integrin alpha-6 light chain;Processed integrin alpha-6	ITGA6	ARGPCTRIEFDNDADPTSESKEDQWMGVTVQ	1382	P	3	1954		ARGPCTRIEF	D	N	D	A	D	P	T	S	E	S	K	EDQWMGVTVQ	0.9999	0.00583465	43.068	41.322	41.734	-4.2121	7120200	NaN	NaN	0.9999	NaN	NaN	43.068
P23246	649	P23246	P23246	Splicing factor, proline- and glutamine-rich	SFPQ	LGGGGGIGYEANPGVPPATMSGSMMGSDMRT	1384	P	3	1955		LGGGGGIGYE	A	N	P	G	V	P	P	A	T	M	S	GSMMGSDMRT	0.881989	4.03e-09	66.479	66.479	50.757	-0.75429	357590000	0.881989	0.50344	0.875332	53.615	44.365	66.479
P23246	460	P23246	P23246	Splicing factor, proline- and glutamine-rich	SFPQ	VIVEPLEQLDDEDGLPEKLAQKNPMYQKERE	1386	P	4	1955		VIVEPLEQLD	D	E	D	G	L	P	E	K	L	A	Q	KNPMYQKERE	0.570943	2.02e-06	115.95	110.41	84.524	-1.0385	216720000	0.559223	0.570943	NaN	115.95	84.524	NaN
P23258	173	P23258	P23258	Tubulin gamma-1 chain	TUBG1	NDRYPKKLVQTYSVFPNQDEMSDVVVQPYNS	1388	P	3	1956		NDRYPKKLVQ	T	Y	S	V	F	P	N	Q	D	E	M	SDVVVQPYNS	1	2.65e-12	138.34	135.03	138.34	1.0601	408190000	0.995337	1	0.999817	48.655	138.34	88.293
P23258;Q9NRH3	275;275	P23258	P23258	Tubulin gamma-1 chain;Tubulin gamma-2 chain	TUBG1;TUBG2	LIPTPRLHFLMTGYTPLTTDQSVASVRKTTV	1389	P	3	1956		LIPTPRLHFL	M	T	G	Y	T	P	L	T	T	D	Q	SVASVRKTTV	1	0.0336578	45.696	31.824	45.696	-0.17947	3624900	1	NaN	NaN	45.696	NaN	NaN
P23284	135	P23284	P23284	Peptidyl-prolyl cis-trans isomerase B	PPIB	GERFPDENFKLKHYGPGWVSMANAGKDTNGS	1390	P	3	1957		GERFPDENFK	L	K	H	Y	G	P	G	W	V	S	M	ANAGKDTNGS	1	0.00774787	71.614	61.926	63.76	-1.1124	34064000	1	1	NaN	71.614	63.76	NaN
P23368	414	P23368	P23368	NAD-dependent malic enzyme, mitochondrial	ME2	FTPDVIRAMASINERPVIFALSNPTAQAECT	1391	P	4	1959		FTPDVIRAMA	S	I	N	E	R	P	V	I	F	A	L	SNPTAQAECT	1	0.0327068	42.865	38.868	42.865	-0.24465	2363800	1	NaN	NaN	42.865	NaN	NaN
P23368	422	P23368	P23368	NAD-dependent malic enzyme, mitochondrial	ME2	MASINERPVIFALSNPTAQAECTAEEAYTLT	1392	P	4	1959		MASINERPVI	F	A	L	S	N	P	T	A	Q	A	E	CTAEEAYTLT	1	2.71e-05	61.228	57.075	42.865	-0.24465	10334000	1	NaN	NaN	61.228	NaN	NaN
P23368	180	P23368	P23368	NAD-dependent malic enzyme, mitochondrial	ME2	RILGLGDLGVYGMGIPVGKLCLYTACAGIRP	1393	P	3	1959		RILGLGDLGV	Y	G	M	G	I	P	V	G	K	L	C	LYTACAGIRP	1	0.001321	104.33	98.792	104.33	-0.18632	783660000	NaN	NaN	1	NaN	NaN	104.33
P23378	70	P23378	P23378	Glycine dehydrogenase (decarboxylating), mitochondrial	GLDC	RLLPRHDDFARRHIGPGDKDQREMLQTLGLA	1394	P	4	1960		RLLPRHDDFA	R	R	H	I	G	P	G	D	K	D	Q	REMLQTLGLA	1	0.000194637	80.359	68.163	79.558	0.14949	238540000	1	NaN	1	80.359	NaN	79.558
P23381	463	P23381	P23381	Tryptophan--tRNA ligase, cytoplasmic;T1-TrpRS;T2-TrpRS	WARS	RRKEVTDEIVKEFMTPRKLSFDFQ_______	1396	P	3	1961		RRKEVTDEIV	K	E	F	M	T	P	R	K	L	S	F	DFQ_______	1	0.00253136	117.98	84.747	84.566	0.71773	228490000	NaN	1	1	NaN	117.98	79.004
P23381	164	P23381	P23381	Tryptophan--tRNA ligase, cytoplasmic;T1-TrpRS;T2-TrpRS	WARS	AYENKKPFYLYTGRGPSSEAMHVGHLIPFIF	1397	P	2	1961		AYENKKPFYL	Y	T	G	R	G	P	S	S	E	A	M	HVGHLIPFIF	1	0.000131076	119.96	105.52	119.96	0.14912	25689000	NaN	1	NaN	NaN	119.96	NaN
P23396	163	P23396	P23396	40S ribosomal protein S3	RPS3	KSMKFVDGLMIHSGDPVNYYVDTAVRHVLLR	1398	P	5	1962		KSMKFVDGLM	I	H	S	G	D	P	V	N	Y	Y	V	DTAVRHVLLR	1	0.000808546	49.709	41.163	49.709	1.0089	72649000	NaN	1	NaN	NaN	49.709	NaN
P23434	152	P23434	P23434	Glycine cleavage system H protein, mitochondrial	GCSH	SCYEDGWLIKMTLSNPSELDELMSEEAYEKY	1400	P	3	1963		SCYEDGWLIK	M	T	L	S	N	P	S	E	L	D	E	LMSEEAYEKY	1	0.0235011	81.904	75.334	40.012	-0.76444	801220000	1	1	1	56.247	81.904	40.012
P23528;Q9Y281	106;106	P23528;Q9Y281	P23528	Cofilin-1;Cofilin-2	CFL1;CFL2	TKESKKEDLVFIFWAPESAPLKSKMIYASSK	1405	P	3	1973;9398		TKESKKEDLV	F	I	F	W	A	P	E	S	A	P	L	KSKMIYASSK	1	4.51e-30	195.54	170.36	43.955	-1.1684	3286300000	1	1	1	139.3	195.54	160.78
P23528;Q9Y281	110;110	P23528;Q9Y281	P23528	Cofilin-1;Cofilin-2	CFL1;CFL2	KKEDLVFIFWAPESAPLKSKMIYASSKDAIK	1406	P	3	1973;9398		KKEDLVFIFW	A	P	E	S	A	P	L	K	S	K	M	IYASSKDAIK	1	4.51e-30	195.54	170.36	43.955	-1.1684	2547300000	1	1	1	139.3	195.54	160.78
P23634	10	P23634	P23634	Plasma membrane calcium-transporting ATPase 4	ATP2B4	______MTNPSDRVLPANSMAESREGDFGCT	1407	P	2	1976		______MTNP	S	D	R	V	L	P	A	N	S	M	A	ESREGDFGCT	0.999908	0.0202728	54.343	38.089	54.343	0.33003	26839000	NaN	NaN	0.999908	NaN	NaN	54.343
P23921	518	P23921	P23921	Ribonucleoside-diphosphate reductase large subunit	RRM1	IGVQGLADAFILMRYPFESAEAQLLNKQIFE	1410	P	4	1984		IGVQGLADAF	I	L	M	R	Y	P	F	E	S	A	E	AQLLNKQIFE	1	1.66e-21	151.99	137.62	151.99	-0.19387	435040000	NaN	1	NaN	NaN	151.99	NaN
P23921	603	P23921	P23921	Ribonucleoside-diphosphate reductase large subunit	RRM1	IAKYGIRNSLLIAPMPTASTAQILGNNESIE	1412	P	3	1984		IAKYGIRNSL	L	I	A	P	M	P	T	A	S	T	A	QILGNNESIE	0.555331	7.58e-07	94.261	87.685	94.261	0.73466	1402800000	0.540417	NaN	0.555331	76.063	NaN	94.261
P24534	148	P24534	P24534	Elongation factor 1-beta	EEF1B2	KPALVAKSSILLDVKPWDDETDMAKLEECVR	1413	P	3	1990		KPALVAKSSI	L	L	D	V	K	P	W	D	D	E	T	DMAKLEECVR	1	0.0051206	83.968	80.631	59.261	-0.44233	69049000	NaN	1	1	NaN	83.968	59.261
P24666	55	P24666	P24666	Low molecular weight phosphotyrosine protein phosphatase	ACP1	WRVDSAATSGYEIGNPPDYRGQSCMKRHGIP	1414	P	4	1993		WRVDSAATSG	Y	E	I	G	N	P	P	D	Y	R	G	QSCMKRHGIP	0.527667	0.000564632	54.223	51.079	47.96	-2.5014	49419000	NaN	0.527667	0.5	NaN	50.851	54.223
P24752	82	P24752	P24752	Acetyl-CoA acetyltransferase, mitochondrial	ACAT1	LGSIAIQGAIEKAGIPKEEVKEAYMGNVLQG	1416	P	4	1995		LGSIAIQGAI	E	K	A	G	I	P	K	E	E	V	K	EAYMGNVLQG	1	0.000228543	76.691	64.258	76.161	-0.34091	1038300000	1	1	1	63.697	76.691	76.691
P24928	528	P24928	P24928	DNA-directed RNA polymerase II subunit RPB1	POLR2A	AEIQELAMVPRMIVTPQSNRPVMGIVQDTLT	1420	P	3	1997		AEIQELAMVP	R	M	I	V	T	P	Q	S	N	R	P	VMGIVQDTLT	0.557692	0.00191731	61.703	48.383	44.848	0.25667	247780000	NaN	0.557692	0.5	NaN	45.395	61.703
P24928	1921	P24928	P24928	DNA-directed RNA polymerase II subunit RPB1	POLR2A	SPKYSPTSPTYSPTSPKYSPTSPTYSPTSPK	1423	P	3	1997		SPKYSPTSPT	Y	S	P	T	S	P	K	Y	S	P	T	SPTYSPTSPK	0.915382	0.0275131	45.611	33.98	45.611	-1.36	11890000	NaN	NaN	0.915382	NaN	NaN	45.611
P24928	1925	P24928	P24928	DNA-directed RNA polymerase II subunit RPB1	POLR2A	SPTSPTYSPTSPKYSPTSPTYSPTSPKGSTY	1424	P	3	1997		SPTSPTYSPT	S	P	K	Y	S	P	T	S	P	T	Y	SPTSPKGSTY	0.915382	0.0275131	45.611	33.98	45.611	-1.36	11890000	NaN	NaN	0.915382	NaN	NaN	45.611
P24928	1928	P24928	P24928	DNA-directed RNA polymerase II subunit RPB1	POLR2A	SPTYSPTSPKYSPTSPTYSPTSPKGSTYSPT	1425	P	3	1997		SPTYSPTSPK	Y	S	P	T	S	P	T	Y	S	P	T	SPKGSTYSPT	0.915032	0.0275131	45.611	33.98	45.611	-1.36	11890000	NaN	NaN	0.915032	NaN	NaN	45.611
P24928	1932	P24928	P24928	DNA-directed RNA polymerase II subunit RPB1	POLR2A	SPTSPKYSPTSPTYSPTSPKGSTYSPTSPGY	1426	P	3	1997		SPTSPKYSPT	S	P	T	Y	S	P	T	S	P	K	G	STYSPTSPGY	0.913695	0.0275131	45.611	33.98	45.611	-1.36	11890000	NaN	NaN	0.913695	NaN	NaN	45.611
P24928	1935	P24928	P24928	DNA-directed RNA polymerase II subunit RPB1	POLR2A	SPKYSPTSPTYSPTSPKGSTYSPTSPGYSPT	1427	P	3	1997		SPKYSPTSPT	Y	S	P	T	S	P	K	G	S	T	Y	SPTSPGYSPT	0.693184	0.0275131	45.611	33.98	45.611	-1.36	11890000	NaN	NaN	0.693184	NaN	NaN	45.611
P24941	234	P24941	P24941	Cyclin-dependent kinase 2	CDK2	LGTPDEVVWPGVTSMPDYKPSFPKWARQDFS	1430	P	3	1998		LGTPDEVVWP	G	V	T	S	M	P	D	Y	K	P	S	FPKWARQDFS	0.590501	0.00257701	56.72	46.462	56.72	0.44451	25410000	0	NaN	0.590501	NaN	NaN	56.72
P25205	510	P25205	P25205	DNA replication licensing factor MCM3	MCM3	REISDHVLRMHRYRAPGEQDGDAMPLGSAVD	1432	P	4	2002		REISDHVLRM	H	R	Y	R	A	P	G	E	Q	D	G	DAMPLGSAVD	0.980536	4.3e-11	100.19	92.078	100.19	-0.065647	155040000	NaN	NaN	0.980536	NaN	NaN	100.19
P25325	71	P25325	P25325	3-mercaptopyruvate sulfurtransferase	MPST	GAAFFDIDQCSDRTSPYDHMLPGAEHFAEYA	1433	P	4	2004		GAAFFDIDQC	S	D	R	T	S	P	Y	D	H	M	L	PGAEHFAEYA	0.970981	0.0034669	56.055	52.528	56.055	-1.2834	318500000	0.970981	NaN	NaN	56.055	NaN	NaN
P25440	545	P25440	P25440	Bromodomain-containing protein 2	BRD2	VHEQLAALSQGPISKPKRKREKKEKKKKRKA	1435	P	2	2007		VHEQLAALSQ	G	P	I	S	K	P	K	R	K	R	E	KKEKKKKRKA	0.999656	1.61e-07	166.09	156.55	130.06	0.48056	961270000	0.999309	0.997254	0.999656	166.09	157.68	130.06
P25440	36	P25440	P25440	Bromodomain-containing protein 2	BRD2	GLGPEAAAPGKRIRKPSLLYEGFESPTMASV	1437	P	3	2007		GLGPEAAAPG	K	R	I	R	K	P	S	L	L	Y	E	GFESPTMASV	0.661283	4.16e-05	58.257	54.445	58.257	-0.80694	19510000	0.661283	NaN	NaN	58.257	NaN	NaN
P25440	290	P25440	P25440	Bromodomain-containing protein 2	BRD2	KKKGVKRKADTTTPTPTAILAPGSPASPPGS	1439	P	2	2007		KKKGVKRKAD	T	T	T	P	T	P	T	A	I	L	A	PGSPASPPGS	0.613703	0.00279094	44.577	33.963	44.577	-0.10858	0	NaN	NaN	0.613703	NaN	NaN	44.577
P25440	296	P25440	P25440	Bromodomain-containing protein 2	BRD2	RKADTTTPTPTAILAPGSPASPPGSLEPKAA	1440	P	4	2007		RKADTTTPTP	T	A	I	L	A	P	G	S	P	A	S	PPGSLEPKAA	0.999376	0.000170712	60.764	50.297	41.65	-1.9302	283320000	0.999376	0.986223	0.998554	47.222	60.764	45.125
P25440	299	P25440	P25440	Bromodomain-containing protein 2	BRD2	DTTTPTPTAILAPGSPASPPGSLEPKAARLP	1441	P	4	2007		DTTTPTPTAI	L	A	P	G	S	P	A	S	P	P	G	SLEPKAARLP	0.999376	0.000170712	60.764	50.297	41.65	-1.9302	283320000	0.999376	0.986223	0.998554	47.222	60.764	45.125
P25440	302	P25440	P25440	Bromodomain-containing protein 2	BRD2	TPTPTAILAPGSPASPPGSLEPKAARLPPMR	1442	P	4	2007		TPTPTAILAP	G	S	P	A	S	P	P	G	S	L	E	PKAARLPPMR	0.999434	0.000170712	60.764	50.297	41.65	-1.9302	283320000	0.999434	0.99151	0.998978	47.222	60.764	45.125
P25440	303	P25440	P25440	Bromodomain-containing protein 2	BRD2	PTPTAILAPGSPASPPGSLEPKAARLPPMRR	1443	P	4	2007		PTPTAILAPG	S	P	A	S	P	P	G	S	L	E	P	KAARLPPMRR	0.99933	0.000170712	60.764	50.297	41.65	-1.9302	283320000	0.99933	0.966155	0.998972	47.222	60.764	45.125
P25440	308	P25440	P25440	Bromodomain-containing protein 2	BRD2	ILAPGSPASPPGSLEPKAARLPPMRRESGRP	1444	P	4	2007		ILAPGSPASP	P	G	S	L	E	P	K	A	A	R	L	PPMRRESGRP	0.999157	0.000170712	60.764	50.297	41.65	-1.9302	283320000	0.999157	0.75083	0.994271	47.222	60.764	45.125
P25786	142	P25786	P25786	Proteasome subunit alpha type-1	PSMA1	PYGVGLLIAGYDDMGPHIFQTCPSANYFDCR	1447	P	3	2013		PYGVGLLIAG	Y	D	D	M	G	P	H	I	F	Q	T	CPSANYFDCR	0.999994	1.54e-13	140.52	133.76	118.61	-0.41484	160550000	0.999993	0.999994	0.999937	140.52	118.61	103.43
P25788	17	P25788	P25788	Proteasome subunit alpha type-3	PSMA3	SSIGTGYDLSASTFSPDGRVFQVEYAMKAVE	1448	P	3	2015		SSIGTGYDLS	A	S	T	F	S	P	D	G	R	V	F	QVEYAMKAVE	1	0.0111182	42.166	30.781	42.166	-1.1111	46993000	NaN	1	NaN	NaN	42.166	NaN
P25789	14	P25789	P25789	Proteasome subunit alpha type-4	PSMA4	__MSRRYDSRTTIFSPEGRLYQVEYAMEAIG	1449	P	5	2016		__MSRRYDSR	T	T	I	F	S	P	E	G	R	L	Y	QVEYAMEAIG	1	4.35e-11	91.504	86.299	91.504	0.052931	99875000	NaN	1	NaN	NaN	91.504	NaN
P26038	470	P26038	P26038	Moesin	MSN	DLEKTRAELKTAMSTPHVAEPAENEQDEQDE	1450	P	4	2019		DLEKTRAELK	T	A	M	S	T	P	H	V	A	E	P	AENEQDEQDE	0.999957	3.19e-36	171.95	170.52	171.95	0.17097	5540300000	0.999957	0.99665	0.999296	171.95	138.7	115.44
P26038	475	P26038	P26038	Moesin	MSN	RAELKTAMSTPHVAEPAENEQDEQDENGAEA	1451	P	3	2019		RAELKTAMST	P	H	V	A	E	P	A	E	N	E	Q	DEQDENGAEA	0.54493	2.94e-09	63.805	63.512	50.492	-0.057451	352510000	0	0.54493	0.537488	NaN	63.805	47.757
P26196	119	P26196	P26196	Probable ATP-dependent RNA helicase DDX6	DDX6	KRELLMGIFEMGWEKPSPIQEESIPIALSGR	1452	P	3	2021		KRELLMGIFE	M	G	W	E	K	P	S	P	I	Q	E	ESIPIALSGR	0.999976	3.59e-06	100.06	92.442	72.425	0.1389	126110000	0.999976	0.9993	NaN	72.425	100.06	NaN
P26196	121	P26196	P26196	Probable ATP-dependent RNA helicase DDX6	DDX6	ELLMGIFEMGWEKPSPIQEESIPIALSGRDI	1453	P	3	2021		ELLMGIFEMG	W	E	K	P	S	P	I	Q	E	E	S	IPIALSGRDI	0.999976	3.59e-06	100.06	92.442	72.425	0.1389	126110000	0.999976	0.9993	NaN	72.425	100.06	NaN
P26196	295	P26196	P26196	Probable ATP-dependent RNA helicase DDX6	DDX6	FPLSVQKFMNSHLQKPYEINLMEELTLKGVT	1454	P	5	2021		FPLSVQKFMN	S	H	L	Q	K	P	Y	E	I	N	L	MEELTLKGVT	1	1.5e-06	115.3	110.3	66.201	0.70717	221010000	1	1	1	115.3	40.328	74.207
P26358	574	P26358	P26358	DNA (cytosine-5)-methyltransferase 1	DNMT1	EQVESYDEAGDSDEQPIFLTPCMRDLIKLAG	1458	P	4	2023		EQVESYDEAG	D	S	D	E	Q	P	I	F	L	T	P	CMRDLIKLAG	0.555625	0.000545331	48.449	46.904	48.449	-1.4973	37579000	0.554719	NaN	0.555625	47.96	NaN	48.449
P26358	1212	P26358	P26358	DNA (cytosine-5)-methyltransferase 1	DNMT1	LVMAGETTNSRGQRLPQKGDVEMLCGGPPCQ	1460	P	3	2023		LVMAGETTNS	R	G	Q	R	L	P	Q	K	G	D	V	EMLCGGPPCQ	0.999942	0.00277504	72.033	65.6	72.033	0.057406	82241000	0.982935	0.999942	NaN	41.491	72.033	NaN
P26368	117	P26368	P26368	Splicing factor U2AF 65 kDa subunit	U2AF2	ITPMQYKAMQAAGQIPATALLPTMTPDGLAV	1461	P	3	2025		ITPMQYKAMQ	A	A	G	Q	I	P	A	T	A	L	L	PTMTPDGLAV	0.518543	0.000371006	42.262	42.262	40.937	-1.0031	527580000	NaN	NaN	0.518543	NaN	NaN	42.262
P26368	127	P26368	P26368	Splicing factor U2AF 65 kDa subunit	U2AF2	AAGQIPATALLPTMTPDGLAVTPTPVPVVGS	1462	P	3	2025		AAGQIPATAL	L	P	T	M	T	P	D	G	L	A	V	TPTPVPVVGS	0.638023	3.11e-07	62.008	57.607	62.008	0.15017	305460000	NaN	0.638023	NaN	NaN	62.008	NaN
P26368	229	P26368	P26368	Splicing factor U2AF 65 kDa subunit	U2AF2	FDGIIFQGQSLKIRRPHDYQPLPGMSENPSV	1463	P	4	2025		FDGIIFQGQS	L	K	I	R	R	P	H	D	Y	Q	P	LPGMSENPSV	0.549011	0.00179304	44.75	39.941	44.75	-0.27579	172140000	0.549011	NaN	NaN	44.75	NaN	NaN
P26368	242	P26368	P26368	Splicing factor U2AF 65 kDa subunit	U2AF2	RRPHDYQPLPGMSENPSVYVPGVVSTVVPDS	1466	P	4	2025		RRPHDYQPLP	G	M	S	E	N	P	S	V	Y	V	P	GVVSTVVPDS	0.553945	1.64e-05	86.194	80.678	86.194	-0.33916	110660000	NaN	NaN	0.553945	NaN	NaN	86.194
P26368	95	P26368	P26368	Splicing factor U2AF 65 kDa subunit	U2AF2	PRHEKKKKVRKYWDVPPPGFEHITPMQYKAM	1467	P	3	2025		PRHEKKKKVR	K	Y	W	D	V	P	P	P	G	F	E	HITPMQYKAM	0.898713	0.0150683	72.21	67.486	72.21	-0.38149	79062000	0.898713	0	NaN	72.21	NaN	NaN
P26368	96	P26368	P26368	Splicing factor U2AF 65 kDa subunit	U2AF2	RHEKKKKVRKYWDVPPPGFEHITPMQYKAMQ	1468	P	3	2025		RHEKKKKVRK	Y	W	D	V	P	P	P	G	F	E	H	ITPMQYKAMQ	0.855809	0.0150683	72.21	67.486	72.21	-0.38149	79062000	0.855809	0	NaN	72.21	NaN	NaN
P26368	157	P26368	P26368	Splicing factor U2AF 65 kDa subunit	U2AF2	SQMTRQARRLYVGNIPFGITEEAMMDFFNAQ	1470	P	2	2025		SQMTRQARRL	Y	V	G	N	I	P	F	G	I	T	E	EAMMDFFNAQ	1	0.00243608	67.358	56.873	67.358	-1.4797	57160000	1	NaN	NaN	67.358	NaN	NaN
P26599	125	P26599	P26599	Polypyrimidine tract-binding protein 1	PTBP1	MVNYYTSVTPVLRGQPIYIQFSNHKELKTDS	1472	P	5	2031		MVNYYTSVTP	V	L	R	G	Q	P	I	Y	I	Q	F	SNHKELKTDS	0.999981	0.00234065	52.909	45.721	52.909	-3.5572	8736000	NaN	NaN	0.999981	NaN	NaN	52.909
P26639	49	P26639	P26639	Threonine--tRNA ligase, cytoplasmic	TARS	KNKEGSGDGGRAELNPWPEYIYTRLEMYNIL	1474	P	3	2032		KNKEGSGDGG	R	A	E	L	N	P	W	P	E	Y	I	YTRLEMYNIL	1	0.0246599	46.833	34.278	46.833	-0.04532	85374000	NaN	1	NaN	NaN	46.833	NaN
P26639	51	P26639	P26639	Threonine--tRNA ligase, cytoplasmic	TARS	KEGSGDGGRAELNPWPEYIYTRLEMYNILKA	1475	P	3	2032		KEGSGDGGRA	E	L	N	P	W	P	E	Y	I	Y	T	RLEMYNILKA	1	0.0246599	46.833	34.278	46.833	-0.04532	85374000	NaN	1	NaN	NaN	46.833	NaN
P26639	654	P26639	P26639	Threonine--tRNA ligase, cytoplasmic	TARS	QQFHDAKFMADIDLDPGCTLNKKIRNAQLAQ	1476	P	2	2032		QQFHDAKFMA	D	I	D	L	D	P	G	C	T	L	N	KKIRNAQLAQ	1	0.0128136	72.321	65.661	72.321	-0.96724	15651000	1	NaN	NaN	72.321	NaN	NaN
P26639	340	P26639	P26639	Threonine--tRNA ligase, cytoplasmic	TARS	KIGRDQELYFFHELSPGSCFFLPKGAYIYNA	1477	P	4	2032		KIGRDQELYF	F	H	E	L	S	P	G	S	C	F	F	LPKGAYIYNA	0.996065	0.00015315	74.062	67.486	74.062	-0.43168	28283000	NaN	0.996065	NaN	NaN	74.062	NaN
P26639	102	P26639	P26639	Threonine--tRNA ligase, cytoplasmic	TARS	LPDGKQVDAESWKTTPYQIACGISQGLADNT	1478	P	3	2032		LPDGKQVDAE	S	W	K	T	T	P	Y	Q	I	A	C	GISQGLADNT	1	0.00542084	55.127	48.138	55.127	-0.085662	16500000	1	NaN	NaN	55.127	NaN	NaN
P26640	342	P26640	P26640	Valine--tRNA ligase	VARS	NVSAANPRGVFMMCIPPPNVTGSLHLGHALT	1484	P	4	2033		NVSAANPRGV	F	M	M	C	I	P	P	P	N	V	T	GSLHLGHALT	0.907111	1.24e-06	75.261	75.261	75.261	0.53626	154680000	NaN	0.907111	NaN	NaN	75.261	NaN
P26640	744	P26640	P26640	Valine--tRNA ligase	VARS	HRIPAYFVTVSDPAVPPGEDPDGRYWVSGRN	1485	P	3	2033		HRIPAYFVTV	S	D	P	A	V	P	P	G	E	D	P	DGRYWVSGRN	0.66406	0.00120276	90.468	84.867	90.468	-2.0466	141130000	0.66406	0.648206	NaN	90.468	71.678	NaN
P26640	745	P26640	P26640	Valine--tRNA ligase	VARS	RIPAYFVTVSDPAVPPGEDPDGRYWVSGRNE	1486	P	3	2033		RIPAYFVTVS	D	P	A	V	P	P	G	E	D	P	D	GRYWVSGRNE	0.66406	0.00120276	90.468	84.867	90.468	-2.0466	141130000	0.66406	0.648206	NaN	90.468	71.678	NaN
P26640	749	P26640	P26640	Valine--tRNA ligase	VARS	YFVTVSDPAVPPGEDPDGRYWVSGRNEAEAR	1487	P	3	2033		YFVTVSDPAV	P	P	G	E	D	P	D	G	R	Y	W	VSGRNEAEAR	0.66406	0.00120276	90.468	84.867	90.468	-2.0466	141130000	0.66406	0.648206	NaN	90.468	71.678	NaN
P26640	31	P26640	P26640	Valine--tRNA ligase	VARS	LRALIAARYGEAGEGPGWGGAHPRICLQPPP	1488	P	3	2033		LRALIAARYG	E	A	G	E	G	P	G	W	G	G	A	HPRICLQPPP	0.98545	0.0242889	96.103	80.213	54.501	-3.3284	22464000	NaN	0.977005	0.98545	NaN	96.103	54.501
P26640	311	P26640	P26640	Valine--tRNA ligase	VARS	MPDSYSPRYVEAAWYPWWEQQGFFKPEYGRP	1489	P	4	2033		MPDSYSPRYV	E	A	A	W	Y	P	W	W	E	Q	Q	GFFKPEYGRP	0.99853	0.0033699	47.919	46.223	47.919	-2.6072	15777000	0.99853	NaN	NaN	47.919	NaN	NaN
P26641	259	P26641	P26641	Elongation factor 1-gamma	EEF1G	PQAERKEEKKAAAPAPEEEMDECEQALAAEP	1494	P	2	2034		PQAERKEEKK	A	A	A	P	A	P	E	E	E	M	D	ECEQALAAEP	0.999902	8.96e-09	131.53	127.07	131.53	-0.50033	3572400000	0.9991	0.999902	0.999826	112.84	131.53	118.13
P26641	10	P26641	P26641	Elongation factor 1-gamma	EEF1G	______MAAGTLYTYPENWRAFKALIAAQYS	1495	P	2	2034		______MAAG	T	L	Y	T	Y	P	E	N	W	R	A	FKALIAAQYS	1	3.09e-05	147.2	128.45	62.303	-0.60557	1468600000	1	1	1	147.2	125.48	134.23
P26641	388	P26641	P26641	Elongation factor 1-gamma	EEF1G	GVWVFRGQELAFPLSPDWQVDYESYTWRKLD	1496	P	2	2034		GVWVFRGQEL	A	F	P	L	S	P	D	W	Q	V	D	YESYTWRKLD	0.921293	0.0191337	97.073	85.382	97.073	-4.0811	0	NaN	0.921293	NaN	NaN	97.073	NaN
P27144	204	P27144	P27144	Adenylate kinase 4, mitochondrial	AK4	GVLHQFSGTETNKIWPYVYTLFSNKITPIQS	1497	P	4	2038		GVLHQFSGTE	T	N	K	I	W	P	Y	V	Y	T	L	FSNKITPIQS	1	2.6e-12	110.26	103.82	110.26	-1.9138	965330000	NaN	1	NaN	NaN	110.26	NaN
P27449	49	P27449	P27449	V-type proton ATPase 16 kDa proteolipid subunit	ATP6V0C	TAKSGTGIAAMSVMRPEQIMKSIIPVVMAGI	1500	P	3	2043		TAKSGTGIAA	M	S	V	M	R	P	E	Q	I	M	K	SIIPVVMAGI	1	0.00527416	56.121	46.2	56.121	-0.012056	91445000	NaN	1	1	NaN	52.862	56.121
P27540	349	P27540	P27540	Aryl hydrocarbon receptor nuclear translocator	ARNT	KFCLVAIGRLQVTSSPNCTDMSNVCQPTEFI	1501	P	3	2045		KFCLVAIGRL	Q	V	T	S	S	P	N	C	T	D	M	SNVCQPTEFI	0.999997	9.76e-06	90.884	84.308	90.884	1.1558	8114800	0.999997	NaN	NaN	90.884	NaN	NaN
P27635	47	P27635	P27635	60S ribosomal protein L10	RPL10	RIFDLGRKKAKVDEFPLCGHMVSDEYEQLSS	1502	P	3	2047		RIFDLGRKKA	K	V	D	E	F	P	L	C	G	H	M	VSDEYEQLSS	1	1.94e-51	195.09	192.89	47.018	-0.3707	6238900000	1	1	1	152.99	195.09	116.35
P27694	482	P27694	P27694	Replication protein A 70 kDa DNA-binding subunit;Replication protein A 70 kDa DNA-binding subunit, N-terminally processed	RPA1	TVVYLRKENCMYQACPTQDCNKKVIDQQNGL	1503	P	3	2048		TVVYLRKENC	M	Y	Q	A	C	P	T	Q	D	C	N	KKVIDQQNGL	1	0.0104362	50.079	49.734	48.907	-0.29125	43306000	1	1	NaN	48.907	50.079	NaN
P27694	144	P27694	P27694	Replication protein A 70 kDa DNA-binding subunit;Replication protein A 70 kDa DNA-binding subunit, N-terminally processed	RPA1	PPAPAASPAASSRPQPQNGSSGMGSTVSKAY	1504	P	5	2048		PPAPAASPAA	S	S	R	P	Q	P	Q	N	G	S	S	GMGSTVSKAY	0.775868	1.85e-05	47.518	44.234	47.518	-1.3266	45727000	NaN	NaN	0.775868	NaN	NaN	47.518
P27694	288	P27694	P27694	Replication protein A 70 kDa DNA-binding subunit;Replication protein A 70 kDa DNA-binding subunit, N-terminally processed	RPA1	KNDYEMTFNNETSVMPCEDDHHLPTVQFDFT	1505	P	4	2048		KNDYEMTFNN	E	T	S	V	M	P	C	E	D	D	H	HLPTVQFDFT	0.826034	0.00058781	50.706	50.706	50.706	-1.0858	27409000	NaN	NaN	0.826034	NaN	NaN	50.706
P27708	1633	P27708	P27708	CAD protein;Glutamine-dependent carbamoyl-phosphate synthase;Aspartate carbamoyltransferase;Dihydroorotase	CAD	KEEILLIKAAKARGLPVTCEVAPHHLFLSHD	1506	P	4	2051		KEEILLIKAA	K	A	R	G	L	P	V	T	C	E	V	APHHLFLSHD	0.994366	0.00103221	60.735	52.742	60.735	-0.71604	135090000	0.994366	NaN	NaN	60.735	NaN	NaN
P27708	1765	P27708	P27708	CAD protein;Glutamine-dependent carbamoyl-phosphate synthase;Aspartate carbamoyltransferase;Dihydroorotase	CAD	VEVDLEHEWTIPSHMPFSKAHWTPFEGQKVK	1508	P	5	2051		VEVDLEHEWT	I	P	S	H	M	P	F	S	K	A	H	WTPFEGQKVK	0.999797	5.65e-05	58.722	53.816	58.722	-0.51524	182490000	0.999593	NaN	0.999797	48.76	NaN	58.722
P27708	1885	P27708	P27708	CAD protein;Glutamine-dependent carbamoyl-phosphate synthase;Aspartate carbamoyltransferase;Dihydroorotase	CAD	EKSSRKVAEPELMGTPDGTCYPPPPVPRQAS	1511	P	3	2051		EKSSRKVAEP	E	L	M	G	T	P	D	G	T	C	Y	PPPPVPRQAS	0.518127	0.0272048	46.027	42.739	46.027	-0.20792	12829000	0	NaN	0.518127	NaN	NaN	46.027
P27708	1834	P27708	P27708	CAD protein;Glutamine-dependent carbamoyl-phosphate synthase;Aspartate carbamoyltransferase;Dihydroorotase	CAD	QLPPSAPATSEMTTTPERPRRGIPGLPDGRF	1512	P	4	2051		QLPPSAPATS	E	M	T	T	T	P	E	R	P	R	R	GIPGLPDGRF	0.658908	0.00245147	70.533	62.564	41.939	1.9752	37178000	0.4149	0.482718	0.658908	70.533	51.956	41.939
P27708	1837	P27708	P27708	CAD protein;Glutamine-dependent carbamoyl-phosphate synthase;Aspartate carbamoyltransferase;Dihydroorotase	CAD	PSAPATSEMTTTPERPRRGIPGLPDGRFHLP	1513	P	3	2051		PSAPATSEMT	T	T	P	E	R	P	R	R	G	I	P	GLPDGRFHLP	0.523846	0.028628	91.114	78.768	91.114	-0.0033498	0	NaN	0.523846	NaN	NaN	91.114	NaN
P27708	531	P27708	P27708	CAD protein;Glutamine-dependent carbamoyl-phosphate synthase;Aspartate carbamoyltransferase;Dihydroorotase	CAD	RAFAARMAEIGEHVAPSEAANSLEQAQAAAE	1514	P	3	2051		RAFAARMAEI	G	E	H	V	A	P	S	E	A	A	N	SLEQAQAAAE	1	0.00992518	46.956	40.307	46.956	-1.2487	25762000	NaN	1	NaN	NaN	46.956	NaN
P27708	796	P27708	P27708	CAD protein;Glutamine-dependent carbamoyl-phosphate synthase;Aspartate carbamoyltransferase;Dihydroorotase	CAD	RMVDENCVGFDHTVKPVSDMELETPTDKRIF	1515	P	4	2051		RMVDENCVGF	D	H	T	V	K	P	V	S	D	M	E	LETPTDKRIF	0.986109	0.00178657	51.22	42.252	51.22	-0.53918	22030000	NaN	NaN	0.986109	NaN	NaN	51.22
P27797	233	P27797	P27797	Calreticulin	CALR	DWDERAKIDDPTDSKPEDWDKPEHIPDPDAK	1516	P	4	2052		DWDERAKIDD	P	T	D	S	K	P	E	D	W	D	K	PEHIPDPDAK	0.856461	0.0257439	52.79	45.759	50.215	0.79242	139230000	NaN	0.856461	NaN	NaN	52.79	NaN
P27797	239	P27797	P27797	Calreticulin	CALR	KIDDPTDSKPEDWDKPEHIPDPDAKKPEDWD	1517	P	4	2052		KIDDPTDSKP	E	D	W	D	K	P	E	H	I	P	D	PDAKKPEDWD	0.842649	0.0257439	52.79	45.759	50.215	0.79242	139230000	NaN	0.842649	NaN	NaN	52.79	NaN
P27797	204	P27797	P27797	Calreticulin	CALR	SQVESGSLEDDWDFLPPKKIKDPDASKPEDW	1518	P	3	2052		SQVESGSLED	D	W	D	F	L	P	P	K	K	I	K	DPDASKPEDW	1	2.94e-06	96.131	87.164	72.086	0.12307	736400000	1	1	1	78.987	88.09	96.131
P27797	205	P27797	P27797	Calreticulin	CALR	QVESGSLEDDWDFLPPKKIKDPDASKPEDWD	1519	P	3	2052		QVESGSLEDD	W	D	F	L	P	P	K	K	I	K	D	PDASKPEDWD	1	2.94e-06	96.131	87.164	72.086	0.12307	736400000	1	1	1	78.987	88.09	96.131
P27797	250	P27797	P27797	Calreticulin	CALR	DWDKPEHIPDPDAKKPEDWDEEMDGEWEPPV	1520	P	3	2052		DWDKPEHIPD	P	D	A	K	K	P	E	D	W	D	E	EMDGEWEPPV	0.999681	0.014741	64.488	62.265	64.488	-0.16782	87123000	0.999681	NaN	NaN	64.488	NaN	NaN
P27797	114	P27797	P27797	Calreticulin	CALR	HEQNIDCGGGYVKLFPNSLDQTDMHGDSEYN	1521	P	3	2052		HEQNIDCGGG	Y	V	K	L	F	P	N	S	L	D	Q	TDMHGDSEYN	0.999874	6.99e-06	75.717	75.717	66.825	-1.2732	990710000	0.998462	0.999873	0.999874	75.717	58.688	66.825
P27816	588	P27816	P27816	Microtubule-associated protein 4	MAP4	AKDVPPLSETEATPVPIKDMEIAQTQKGISE	1522	P	4	2053		AKDVPPLSET	E	A	T	P	V	P	I	K	D	M	E	IAQTQKGISE	0.808697	9.92e-10	114.61	102.63	66.72	-0.32357	303810000	NaN	0.807687	0.808697	NaN	114.61	66.72
P27816	508	P27816	P27816	Microtubule-associated protein 4	MAP4	APSTVKEVGLLKDMSPLSETEMALGKDVTPP	1523	P	4	2053		APSTVKEVGL	L	K	D	M	S	P	L	S	E	T	E	MALGKDVTPP	1	9.8e-06	109.77	109.77	109.77	0.20562	896410000	0.999927	1	0.999823	70.451	109.77	84.962
P27824	391	P27824	P27824	Calnexin	CANX	NPNYKGKWKPPMIDNPSYQGIWKPRKIPNPD	1530	P	4	2054		NPNYKGKWKP	P	M	I	D	N	P	S	Y	Q	G	I	WKPRKIPNPD	1	0.00121525	87.287	68.516	87.287	0.13939	703610000	0	1	0	NaN	87.287	NaN
P27824	399	P27824	P27824	Calnexin	CANX	KPPMIDNPSYQGIWKPRKIPNPDFFEDLEPF	1531	P	4	2054		KPPMIDNPSY	Q	G	I	W	K	P	R	K	I	P	N	PDFFEDLEPF	0.999999	0.00121525	87.287	68.516	87.287	0.13939	748350000	0	0.999999	0.979867	NaN	87.287	64.507
P28066	151	P28066	P28066	Proteasome subunit alpha type-5	PSMA5	PFGVALLFGGVDEKGPQLFHMDPSGTFVQCD	1532	P	3	2057		PFGVALLFGG	V	D	E	K	G	P	Q	L	F	H	M	DPSGTFVQCD	0.99933	0.00234946	69.737	61.243	69.737	-0.73749	86899000	0.775644	NaN	0.99933	52.784	NaN	69.737
P28288	509	P28288	P28288	ATP-binding cassette sub-family D member 3	ABCD3	GGRLTKPERGKLFYVPQRPYMTLGTLRDQVI	1536	P	4	2061		GGRLTKPERG	K	L	F	Y	V	P	Q	R	P	Y	M	TLGTLRDQVI	0.544573	0.00538896	53.444	45.722	53.444	-0.91225	32842000	0.544573	NaN	NaN	53.444	NaN	NaN
P28331	235	P28331	P28331	NADH-ubiquinone oxidoreductase 75 kDa subunit, mitochondrial	NDUFS1	GNIIDICPVGALTSKPYAFTARPWETRKTES	1540	P	4	2066		GNIIDICPVG	A	L	T	S	K	P	Y	A	F	T	A	RPWETRKTES	0.999797	0.000323078	56.164	51.763	56.164	1.4511	8968500	0.999797	NaN	NaN	56.164	NaN	NaN
P28331	242	P28331	P28331	NADH-ubiquinone oxidoreductase 75 kDa subunit, mitochondrial	NDUFS1	PVGALTSKPYAFTARPWETRKTESIDVMDAV	1541	P	4	2066		PVGALTSKPY	A	F	T	A	R	P	W	E	T	R	K	TESIDVMDAV	0.999797	0.000323078	56.164	51.763	56.164	1.4511	8968500	0.999797	NaN	NaN	56.164	NaN	NaN
P28340	942	P28340	P28340	DNA polymerase delta catalytic subunit	POLD1	ISAAKGVAAYMKSEDPLFVLEHSLPIDTQYY	1542	P	5	2067		ISAAKGVAAY	M	K	S	E	D	P	L	F	V	L	E	HSLPIDTQYY	0.997498	3.01e-07	95.099	93.678	95.099	0.51687	738980000	0.997498	NaN	0.987356	95.099	NaN	61.228
P28482	93	P28482	P28482	Mitogen-activated protein kinase 1	MAPK1	FRHENIIGINDIIRAPTIEQMKDVYIVQDLM	1544	P	4	2072		FRHENIIGIN	D	I	I	R	A	P	T	I	E	Q	M	KDVYIVQDLM	1	0.00473255	52.824	47.45	49.186	-0.74923	194540000	NaN	1	1	NaN	49.186	52.824
P28482	328	P28482	P28482	Mitogen-activated protein kinase 1	MAPK1	LEQYYDPSDEPIAEAPFKFDMELDDLPKEKL	1545	P	4	2072		LEQYYDPSDE	P	I	A	E	A	P	F	K	F	D	M	ELDDLPKEKL	0.969728	2.17e-07	59.678	56.708	57.14	-0.78771	90557000	0.76064	NaN	0.969728	59.678	NaN	57.14
P28838	333	P28838	P28838	Cytosol aminopeptidase	LAP3	SAAKLNLPINIIGLAPLCENMPSGKANKPGD	1546	P	2	2080		SAAKLNLPIN	I	I	G	L	A	P	L	C	E	N	M	PSGKANKPGD	0.898442	3.26e-15	159.52	142.99	159.52	0.14616	326190000	0.898442	0.846556	NaN	159.52	51.726	NaN
P28838	339	P28838	P28838	Cytosol aminopeptidase	LAP3	LPINIIGLAPLCENMPSGKANKPGDVVRAKN	1547	P	2	2080		LPINIIGLAP	L	C	E	N	M	P	S	G	K	A	N	KPGDVVRAKN	0.920096	1.86e-05	102.64	89.76	71.241	-0.86821	51444000	0.920096	0.880633	0.901411	71.241	102.64	46.702
P29083	315	P29083	P29083	General transcription factor IIE subunit 1	GTF2E1	IDMDAFQEREEGHAGPDDNEEVMRALLIHEK	1548	P	5	2081		IDMDAFQERE	E	G	H	A	G	P	D	D	N	E	E	VMRALLIHEK	1	1.4e-11	74.767	71.329	50.35	-0.59785	205770000	1	1	NaN	74.767	50.35	NaN
P29372	57	P29372	P29372	DNA-3-methyladenine glycosylase	MPG	AEQPHSSSDAAQAPCPRERCLGPPTTPGPYR	1551	P	4	2091		AEQPHSSSDA	A	Q	A	P	C	P	R	E	R	C	L	GPPTTPGPYR	0.530379	4.88e-06	75.703	74.787	75.703	1.0899	37335000	0.51351	0.530379	NaN	46.783	75.703	NaN
P29375	914	P29375	P29375	Lysine-specific demethylase 5A	KDM5A	QQARWLDEVRLTLSDPQQVTLDVMKKLIDSG	1552	P	3	2094		QQARWLDEVR	L	T	L	S	D	P	Q	Q	V	T	L	DVMKKLIDSG	1	0.0160143	54.402	21.668	54.402	-0.16641	176370000	NaN	1	NaN	NaN	54.402	NaN
P29401	80	P29401	P29401	Transketolase	TKT	NPHNDRFVLSKGHAAPILYAVWAEAGFLAEA	1553	P	5	2095		NPHNDRFVLS	K	G	H	A	A	P	I	L	Y	A	V	WAEAGFLAEA	0.99669	0.000586483	55.919	51.997	55.919	-3.0045	105070000	NaN	0.993371	0.99669	NaN	43.444	55.919
P29401	304	P29401	P29401	Transketolase	TKT	PQEDAPSVDIANIRMPSLPSYKVGDKIATRK	1556	P	3	2095		PQEDAPSVDI	A	N	I	R	M	P	S	L	P	S	Y	KVGDKIATRK	0.73323	0.00113795	76.691	70.032	76.691	-0.42356	48000000	NaN	0.73323	NaN	NaN	76.691	NaN
P29401	38	P29401	P29401	Transketolase	TKT	RISSIQATTAAGSGHPTSCCSAAEIMAVLFF	1557	P	4	2095		RISSIQATTA	A	G	S	G	H	P	T	S	C	C	S	AAEIMAVLFF	1	0.00631807	55.702	50.582	55.702	-0.64107	45332000	NaN	1	NaN	NaN	55.702	NaN
P29692	204	P29692	P29692	Elongation factor 1-delta	EEF1D	KPALVAKSSILLDVKPWDDETDMAQLEACVR	1559	P	3	2100		KPALVAKSSI	L	L	D	V	K	P	W	D	D	E	T	DMAQLEACVR	1	0.00061833	105.46	94.644	68.42	-0.090597	480410000	1	1	1	68.42	105.46	91.441
P29966	96	P29966	P29966	Myristoylated alanine-rich C-kinase substrate	MARCKS	SPSAAEKGEPAAAAAPEAGASPVEKEAPAEG	1560	P	4	2103		SPSAAEKGEP	A	A	A	A	A	P	E	A	G	A	S	PVEKEAPAEG	0.988694	8.34e-06	46.14	45.102	46.14	-0.71201	21563000	NaN	NaN	0.988694	NaN	NaN	46.14
P29966	102	P29966	P29966	Myristoylated alanine-rich C-kinase substrate	MARCKS	KGEPAAAAAPEAGASPVEKEAPAEGEAAEPG	1561	P	4	2103		KGEPAAAAAP	E	A	G	A	S	P	V	E	K	E	A	PAEGEAAEPG	0.988693	8.34e-06	46.14	45.102	46.14	-0.71201	21563000	NaN	NaN	0.988693	NaN	NaN	46.14
P29966	108	P29966	P29966	Myristoylated alanine-rich C-kinase substrate	MARCKS	AAAPEAGASPVEKEAPAEGEAAEPGSPTAAE	1562	P	4	2103		AAAPEAGASP	V	E	K	E	A	P	A	E	G	E	A	AEPGSPTAAE	0.988187	8.34e-06	46.14	45.102	46.14	-0.71201	21563000	NaN	NaN	0.988187	NaN	NaN	46.14
P29966	116	P29966	P29966	Myristoylated alanine-rich C-kinase substrate	MARCKS	SPVEKEAPAEGEAAEPGSPTAAEGEAASAAS	1563	P	4	2103		SPVEKEAPAE	G	E	A	A	E	P	G	S	P	T	A	AEGEAASAAS	0.988187	8.34e-06	46.14	45.102	46.14	-0.71201	21563000	NaN	NaN	0.988187	NaN	NaN	46.14
P29966	119	P29966	P29966	Myristoylated alanine-rich C-kinase substrate	MARCKS	EKEAPAEGEAAEPGSPTAAEGEAASAASSTS	1564	P	4	2103		EKEAPAEGEA	A	E	P	G	S	P	T	A	A	E	G	EAASAASSTS	0.954313	8.34e-06	46.14	45.102	46.14	-0.71201	21563000	NaN	NaN	0.954313	NaN	NaN	46.14
P30040	155	P30040	P30040	Endoplasmic reticulum resident protein 29	ERP29	AIQRWLKGQGVYLGMPGCLPVYDALAGEFIR	1565	P	3	2107		AIQRWLKGQG	V	Y	L	G	M	P	G	C	L	P	V	YDALAGEFIR	0.998456	0.000958492	63.122	55.225	63.122	-1.9642	77459000	0.989693	0.998456	NaN	48.489	63.122	NaN
P30041	128	P30041	P30041	Peroxiredoxin-6	PRDX6	LLGMLDPAEKDEKGMPVTARVVFVFGPDKKL	1566	P	3	2108		LLGMLDPAEK	D	E	K	G	M	P	V	T	A	R	V	VFVFGPDKKL	0.93471	0.000262631	79.762	79.762	79.762	0.29698	19551000	NaN	0.93471	NaN	NaN	79.762	NaN
P30041	178	P30041	P30041	Peroxiredoxin-6	PRDX6	VVISLQLTAEKRVATPVDWKDGDSVMVLPTI	1567	P	3	2108		VVISLQLTAE	K	R	V	A	T	P	V	D	W	K	D	GDSVMVLPTI	0.999674	0.00250751	68.173	57.688	58.015	0.75474	3326700000	0.995547	0.998709	0.999674	52.707	68.173	58.015
P30043	83	P30043	P30043	Flavin reductase (NADPH)	BLVRB	QDAVIVLLGTRNDLSPTTVMSEGARNIVAAM	1568	P	3	2109		QDAVIVLLGT	R	N	D	L	S	P	T	T	V	M	S	EGARNIVAAM	1	0.00156319	61.415	50.804	61.415	0.055676	6937200	1	NaN	NaN	61.415	NaN	NaN
P30046;A6NHG4	2;2	P30046	P30046	D-dopachrome decarboxylase;D-dopachrome decarboxylase-like protein	DDT;DDTL	______________MPFLELDTNLPANRVPA	1569	P	4	2111		__________	_	_	_	_	M	P	F	L	E	L	D	TNLPANRVPA	1	1.8e-16	149.36	143.38	149.36	0.094726	1119200000	1	1	1	98.175	149.36	109.66
P30048	230	P30048	P30048	Thioredoxin-dependent peroxide reductase, mitochondrial	PRDX3	LVKAFQYVETHGEVCPANWTPDSPTIKPSPA	1570	P	4	2113		LVKAFQYVET	H	G	E	V	C	P	A	N	W	T	P	DSPTIKPSPA	0.999926	6.04e-09	78.159	74.311	66.479	-1.9993	1209600000	0.999926	0.992508	0.998217	73.107	75.141	78.159
P30048	235	P30048	P30048	Thioredoxin-dependent peroxide reductase, mitochondrial	PRDX3	QYVETHGEVCPANWTPDSPTIKPSPAASKEY	1571	P	4	2113		QYVETHGEVC	P	A	N	W	T	P	D	S	P	T	I	KPSPAASKEY	0.970269	1.11e-07	101.37	98.62	40.849	0.17604	688000000	0.931312	0.918979	0.970269	92.121	101.37	62.105
P30048	238	P30048	P30048	Thioredoxin-dependent peroxide reductase, mitochondrial	PRDX3	ETHGEVCPANWTPDSPTIKPSPAASKEYFQK	1572	P	4	2113		ETHGEVCPAN	W	T	P	D	S	P	T	I	K	P	S	PAASKEYFQK	0.970269	4.13e-06	66.479	60.878	40.849	0.17604	478050000	0.931312	0.918979	0.970269	66.479	46.464	40.849
P30050	163	P30050	P30050	60S ribosomal protein L12	RPL12	PHDIIDDINSGAVECPAS_____________	1573	P	3	2115		PHDIIDDINS	G	A	V	E	C	P	A	S	_	_	_	__________	0.999995	5.29e-05	54.281	50.676	54.281	-0.088056	481880000	0.999995	0.969981	NaN	54.281	46.813	NaN
P30086	2	P30086	P30086	Phosphatidylethanolamine-binding protein 1;Hippocampal cholinergic neurostimulating peptide	PEBP1	______________MPVDLSKWSGPLSLQEV	1574	P	4	2118		__________	_	_	_	_	M	P	V	D	L	S	K	WSGPLSLQEV	0.996857	3.61e-09	68.101	60.359	42.262	-1.7517	12920000	0.996857	0.48722	NaN	42.262	68.101	NaN
P30086	11	P30086	P30086	Phosphatidylethanolamine-binding protein 1;Hippocampal cholinergic neurostimulating peptide	PEBP1	_____MPVDLSKWSGPLSLQEVDEQPQHPLH	1575	P	4	2118		_____MPVDL	S	K	W	S	G	P	L	S	L	Q	E	VDEQPQHPLH	0.999998	7.61e-12	107	98.501	105.49	0.51407	239890000	0.999929	0.999998	0.997265	107	105.49	44.278
P30086	21	P30086	P30086	Phosphatidylethanolamine-binding protein 1;Hippocampal cholinergic neurostimulating peptide	PEBP1	SKWSGPLSLQEVDEQPQHPLHVTYAGAAVDE	1576	P	4	2118		SKWSGPLSLQ	E	V	D	E	Q	P	Q	H	P	L	H	VTYAGAAVDE	0.874576	0.00197424	56.709	46.997	56.709	1.2447	23151000	0.874576	0	NaN	56.709	NaN	NaN
P30153	367	P30153	P30153	Serine/threonine-protein phosphatase 2A 65 kDa regulatory subunit A alpha isoform	PPP2R1A	LSPILGKDNTIEHLLPLFLAQLKDECPEVRL	1580	P	5	2120		LSPILGKDNT	I	E	H	L	L	P	L	F	L	A	Q	LKDECPEVRL	0.728728	1.03e-06	57.925	54.288	48.433	1.0769	103700000	0.728728	0.499707	NaN	48.433	57.925	NaN
P30153	378	P30153	P30153	Serine/threonine-protein phosphatase 2A 65 kDa regulatory subunit A alpha isoform	PPP2R1A	EHLLPLFLAQLKDECPEVRLNIISNLDCVNE	1581	P	4	2120		EHLLPLFLAQ	L	K	D	E	C	P	E	V	R	L	N	IISNLDCVNE	0.999998	1.03e-06	86.182	79.818	85.062	-0.28806	141120000	0.99998	0.999998	NaN	86.182	85.062	NaN
P30519	92	P30519	P30519	Heme oxygenase 2	HMOX2	TYSALEEEMERNKDHPAFAPLYFPMELHRKE	1587	P	5	2133		TYSALEEEME	R	N	K	D	H	P	A	F	A	P	L	YFPMELHRKE	0.860648	2.62e-06	53.569	41.926	53.569	1.103	796000000	0.792807	0.858946	0.860648	53.408	47.105	53.569
P30520	406	P30520	P30520	Adenylosuccinate synthetase isozyme 2	ADSS	NQEVLNKVEVQYKTLPGWNTDISNARAFKEL	1589	P	2	2134		NQEVLNKVEV	Q	Y	K	T	L	P	G	W	N	T	D	ISNARAFKEL	1	0.0278138	94.297	67.782	94.297	-1.8402	9118300	1	NaN	NaN	94.297	NaN	NaN
P30533	206	P30533	P30533	Alpha-2-macroglobulin receptor-associated protein	LRPAP1	ETLSRTEEIHENVISPSDLSDIKGSVLHSRH	1590	P	6	2136		ETLSRTEEIH	E	N	V	I	S	P	S	D	L	S	D	IKGSVLHSRH	1	1.31e-09	69.163	65.306	69.163	1.5652	819740000	1	1	1	61.602	69.163	56.947
P30566	471	P30566	P30566	Adenylosuccinate lyase	ADSL	QVQRFLEEEVYPLLKPYESVMKVKAELCL__	1591	P	3	2138		QVQRFLEEEV	Y	P	L	L	K	P	Y	E	S	V	M	KVKAELCL__	0.999628	0.000735405	98.796	91.464	98.796	-0.062072	6826800000	0.999401	0.999628	NaN	80.638	98.796	NaN
P30626	187	P30626	P30626	Sorcin	SRI	SFRRRDTAQQGVVNFPYDDFIQCVMSV____	1593	P	2	2141		SFRRRDTAQQ	G	V	V	N	F	P	Y	D	D	F	I	QCVMSV____	1	0.00511862	59.607	52.879	59.607	3.3838	12582000	1	NaN	1	59.607	NaN	54.857
P30837	184	P30837	P30837	Aldehyde dehydrogenase X, mitochondrial	ALDH1B1	CFTRHEPVGVCGQIIPWNFPLVMQGWKLAPA	1594	P	3	2144		CFTRHEPVGV	C	G	Q	I	I	P	W	N	F	P	L	VMQGWKLAPA	0.980238	0.00378954	50.752	31.64	50.752	-3.9202	56834000	NaN	0.980238	0	NaN	50.752	NaN
P31040	404	P31040	P31040	Succinate dehydrogenase [ubiquinone] flavoprotein subunit, mitochondrial	SDHA	IFAGVDVTKEPIPVLPTVHYNMGGIPTNYKG	1599	P	3	2146		IFAGVDVTKE	P	I	P	V	L	P	T	V	H	Y	N	MGGIPTNYKG	0.985586	0.00499602	57.484	52.475	57.484	-1.1375	59738000	0.985586	NaN	NaN	57.484	NaN	NaN
P31040	658	P31040	P31040	Succinate dehydrogenase [ubiquinone] flavoprotein subunit, mitochondrial	SDHA	PVIDKTLNEADCATVPPAIRSY_________	1600	P	3	2146		PVIDKTLNEA	D	C	A	T	V	P	P	A	I	R	S	Y_________	0.777746	0.0284247	58.938	52.643	58.938	3.6179	0	NaN	NaN	0.777746	NaN	NaN	58.938
P31150	163	P31150	P31150	Rab GDP dissociation inhibitor alpha	GDI1	ANFDENDPKTFEGVDPQTTSMRDVYRKFDLG	1601	P	3	2148		ANFDENDPKT	F	E	G	V	D	P	Q	T	T	S	M	RDVYRKFDLG	1	1.1e-12	143.89	136.7	76.85	-0.1258	378950000	0.999987	0.999996	1	128.59	143.89	76.85
P31150;P50395	322;322	P31150;P50395	P50395	Rab GDP dissociation inhibitor alpha;Rab GDP dissociation inhibitor beta	GDI1;GDI2	PIKNTNDANSCQIIIPQNQVNRKSDIYVCMI	1602	P	3	2148;2579		PIKNTNDANS	C	Q	I	I	I	P	Q	N	Q	V	N	RKSDIYVCMI	1	0.0017131	103.44	95.335	64.327	0.053152	438810000	1	1	NaN	103.44	51.535	NaN
P31150	37	P31150	P31150	Rab GDP dissociation inhibitor alpha	GDI1	IMSVNGKKVLHMDRNPYYGGESSSITPLEEL	1603	P	4	2148		IMSVNGKKVL	H	M	D	R	N	P	Y	Y	G	G	E	SSSITPLEEL	1	1.79e-05	95.71	92.264	95.71	-0.16968	210420000	1	0.999959	0.99999	95.71	51.857	65.753
P31930	408	P31930	P31930	Cytochrome b-c1 complex subunit 1, mitochondrial	UQCRC1	NILRNALVSHLDGTTPVCEDIGRSLLTYGRR	1606	P	3	2167		NILRNALVSH	L	D	G	T	T	P	V	C	E	D	I	GRSLLTYGRR	1	0.000820691	80.585	71.005	58.848	0.055449	528240000	1	NaN	NaN	80.585	NaN	NaN
P31930	454	P31930	P31930	Cytochrome b-c1 complex subunit 1, mitochondrial	UQCRC1	SVVREICSKYIYDQCPAVAGYGPIEQLPDYN	1607	P	3	2167		SVVREICSKY	I	Y	D	Q	C	P	A	V	A	G	Y	GPIEQLPDYN	0.999496	0.0133898	59.814	53.832	59.814	0.46537	73995000	0.999496	NaN	NaN	59.814	NaN	NaN
P31939	278	P31939	P31939	Bifunctional purine biosynthesis protein PURH;Phosphoribosylaminoimidazolecarboxamide formyltransferase;IMP cyclohydrolase	ATIC	ASFKHVSPAGAAVGIPLSEDEAKVCMVYDLY	1609	P	4	2169		ASFKHVSPAG	A	A	V	G	I	P	L	S	E	D	E	AKVCMVYDLY	0.993754	1.6e-06	52.155	48.271	52.155	0.18148	34804000	NaN	0.976647	0.993754	NaN	45.751	52.155
P31939	328	P31939	P31939	Bifunctional purine biosynthesis protein PURH;Phosphoribosylaminoimidazolecarboxamide formyltransferase;IMP cyclohydrolase	ATIC	SSFGDFVALSDVCDVPTAKIISREVSDGIIA	1610	P	2	2169		SSFGDFVALS	D	V	C	D	V	P	T	A	K	I	I	SREVSDGIIA	1	0.017201	60.08	56.136	60.08	-1.2851	13137000	1	NaN	NaN	60.08	NaN	NaN
P31939	148	P31939	P31939	Bifunctional purine biosynthesis protein PURH;Phosphoribosylaminoimidazolecarboxamide formyltransferase;IMP cyclohydrolase	ATIC	RAAAKNHARVTVVCEPEDYVVVSTEMQSSES	1611	P	3	2169		RAAAKNHARV	T	V	V	C	E	P	E	D	Y	V	V	VSTEMQSSES	1	0.000327385	69.72	69.238	69.72	-0.15878	119570000	1	NaN	NaN	69.72	NaN	NaN
P31939	212	P31939	P31939	Bifunctional purine biosynthesis protein PURH;Phosphoribosylaminoimidazolecarboxamide formyltransferase;IMP cyclohydrolase	ATIC	YSKGVSQMPLRYGMNPHQTPAQLYTLQPKLP	1612	P	3	2169		YSKGVSQMPL	R	Y	G	M	N	P	H	Q	T	P	A	QLYTLQPKLP	0.999947	0.000323045	92.264	83.603	92.264	0.17184	701460000	0.997569	0.999947	0.999849	86.479	92.264	83.792
P31942	271	P31942	P31942	Heterogeneous nuclear ribonucleoprotein H3	HNRNPH3	NNMQHRYIELFLNSTPGGGSGMGGSGMGGYG	1613	P	4	2170		NNMQHRYIEL	F	L	N	S	T	P	G	G	G	S	G	MGGSGMGGYG	1	1.49e-07	51.774	50.21	51.774	-1.659	242520000	1	1	1	46.082	51.774	47.749
P31943	102	P31943	P31943	Heterogeneous nuclear ribonucleoprotein H;Heterogeneous nuclear ribonucleoprotein H, N-terminally processed	HNRNPH1	KSNNVEMDWVLKHTGPNSPDTANDGFVRLRG	1614	P	3	2171		KSNNVEMDWV	L	K	H	T	G	P	N	S	P	D	T	ANDGFVRLRG	0.961547	0.000244105	69.435	62.775	56.688	-4.4096	43978000	NaN	0.961547	0.956679	NaN	56.688	69.435
P31948	493	P31948	P31948	Stress-induced-phosphoprotein 1	STIP1	RHDSPEDVKRRAMADPEVQQIMSDPAMRLIL	1616	P	3	2174		RHDSPEDVKR	R	A	M	A	D	P	E	V	Q	Q	I	MSDPAMRLIL	0.630282	0.000257445	70.783	70.783	70.783	-0.22542	172720000	0.630282	0.593463	0.560795	70.783	63.145	43.534
P32321	16	P32321	P32321	Deoxycytidylate deaminase	DCTD	MSEVSCKKRDDYLEWPEYFMAVAFLSAQRSK	1619	P	3	2182		MSEVSCKKRD	D	Y	L	E	W	P	E	Y	F	M	A	VAFLSAQRSK	1	0.0144842	41.491	34.616	41.491	-2.352	33891000	NaN	1	NaN	NaN	41.491	NaN
P32519	293	P32519	P32519	ETS-related transcription factor Elf-1	ELF1	AKVEGQRLVYQFKEMPKDLIYINDEDPSSSI	1621	P	4	2184		AKVEGQRLVY	Q	F	K	E	M	P	K	D	L	I	Y	INDEDPSSSI	0.960936	0.000602736	45.748	43.799	42.461	-1.9364	26295000	0.602267	0.894262	0.960936	45.748	42.139	42.461
P32969	130	P32969	P32969	60S ribosomal protein L9	RPL9	RNFLGEKYIRRVRMRPGVACSVSQAQKDELI	1622	P	4	2188		RNFLGEKYIR	R	V	R	M	R	P	G	V	A	C	S	VSQAQKDELI	1	1.07e-11	98.551	97.258	71.748	2.6732	231680000	NaN	1	1	NaN	50.897	98.551
P33176	577	P33176	P33176	Kinesin-1 heavy chain	KIF5B	LAEIGIAVGNNDVKQPEGTGMIDEEFTVARL	1623	P	4	2190		LAEIGIAVGN	N	D	V	K	Q	P	E	G	T	G	M	IDEEFTVARL	1	3.16e-10	90.3	83.75	90.3	-0.65818	223780000	1	1	1	54.09	87.226	90.3
P33176	176	P33176	P33176	Kinesin-1 heavy chain	KIF5B	RVPYVKGCTERFVCSPDEVMDTIDEGKSNRH	1624	P	2	2190		RVPYVKGCTE	R	F	V	C	S	P	D	E	V	M	D	TIDEGKSNRH	1	0.019234	65.574	52.147	65.574	0.12008	4351600	1	NaN	NaN	65.574	NaN	NaN
P33176	109	P33176	P33176	Kinesin-1 heavy chain	KIF5B	TMEGKLHDPEGMGIIPRIVQDIFNYIYSMDE	1625	P	3	2190		TMEGKLHDPE	G	M	G	I	I	P	R	I	V	Q	D	IFNYIYSMDE	0.904013	0.00355008	82.877	67.723	82.877	-0.35018	0	0	NaN	0.904013	NaN	NaN	82.877
P33240	485	P33240	P33240	Cleavage stimulation factor subunit 2	CSTF2	PVPGPRGPIPSGMQGPSPINMGAVVPQGSRQ	1628	P	3	2191		PVPGPRGPIP	S	G	M	Q	G	P	S	P	I	N	M	GAVVPQGSRQ	0.517305	0.0172236	42.454	42.454	41.763	-0.12925	47753000	NaN	0	0.517305	NaN	NaN	42.454
P33552	25	P33552	P33552	Cyclin-dependent kinases regulatory subunit 2	CKS2	DKYFDEHYEYRHVMLPRELSKQVPKTHLMSE	1635	P	4	2195		DKYFDEHYEY	R	H	V	M	L	P	R	E	L	S	K	QVPKTHLMSE	1	0.00529092	64.394	59.076	46.408	-0.37968	52434000	1	NaN	1	46.408	NaN	64.394
P33981	797	P33981	P33981	Dual specificity protein kinase TTK	TTK	IPELLAHPYVQIQTHPVNQMAKGTTEEMKYV	1636	P	3	2199		IPELLAHPYV	Q	I	Q	T	H	P	V	N	Q	M	A	KGTTEEMKYV	0.999206	1.53e-05	99.366	81.459	99.366	-0.024855	3166700000	NaN	0.999206	0.9709	NaN	99.366	58.418
P33991	619	P33991	P33991	DNA replication licensing factor MCM4	MCM4	ICQLNARTSVLAAANPIESQWNPKKTTIENI	1639	P	2	2200		ICQLNARTSV	L	A	A	A	N	P	I	E	S	Q	W	NPKKTTIENI	1	2.27e-08	146.36	128.22	146.36	0.26947	614930000	1	1	1	116.54	146.36	130.1
P33991	626	P33991	P33991	DNA replication licensing factor MCM4	MCM4	TSVLAAANPIESQWNPKKTTIENIQLPHTLL	1640	P	2	2200		TSVLAAANPI	E	S	Q	W	N	P	K	K	T	T	I	ENIQLPHTLL	1	2.42e-17	192.68	165.2	146.36	0.26947	668440000	1	1	1	192.68	146.36	130.1
P33993	574	P33993	P33993	DNA replication licensing factor MCM7	MCM7	MRRYIAMCREKQPMVPESLADYITAAYVEMR	1642	P	3	2202		MRRYIAMCRE	K	Q	P	M	V	P	E	S	L	A	D	YITAAYVEMR	0.593615	0.000968566	78.067	67.359	78.067	-0.367	208000000	0.593615	0.53793	NaN	78.067	57.61	NaN
P33993	525	P33993	P33993	DNA replication licensing factor MCM7	MCM7	ALLSRFDLLWLIQDRPDRDNDLRLAQHITYV	1643	P	4	2202		ALLSRFDLLW	L	I	Q	D	R	P	D	R	D	N	D	LRLAQHITYV	1	0.00202916	74.786	64.806	74.786	-0.64841	18712000	NaN	1	NaN	NaN	74.786	NaN
P33993	127	P33993	P33993	DNA replication licensing factor MCM7	MCM7	RSRDPGMVRSPQNQYPAELMRRFELYFQGPS	1644	P	2	2202		RSRDPGMVRS	P	Q	N	Q	Y	P	A	E	L	M	R	RFELYFQGPS	1	0.0343081	101.95	80.955	101.95	-0.22142	68931000	NaN	1	0	NaN	101.95	NaN
P34059	381	P34059	P34059	N-acetylgalactosamine-6-sulfatase	GALNS	LNLLPTLLQGRLMDRPIFYYRGDTLMAATLG	1646	P	4	2203		LNLLPTLLQG	R	L	M	D	R	P	I	F	Y	Y	R	GDTLMAATLG	1	0.00206548	59.814	47.618	59.814	3.3061	18444000	NaN	NaN	1	NaN	NaN	59.814
P34896	171	P34896	P34896	Serine hydroxymethyltransferase, cytosolic	SHMT1	DKKKISATSIFFESMPYKVNPDTGYINYDQL	1647	P	3	2206		DKKKISATSI	F	F	E	S	M	P	Y	K	V	N	P	DTGYINYDQL	0.984872	7.7e-06	84.337	79.332	84.337	-3.8206	30659000	0.984872	0.982486	NaN	84.337	74.474	NaN
P34897	167	P34897	P34897	Serine hydroxymethyltransferase, mitochondrial	SHMT2	TALLQPHDRIMGLDLPDGGHLTHGYMSDVKR	1648	P	5	2207		TALLQPHDRI	M	G	L	D	L	P	D	G	G	H	L	THGYMSDVKR	1	0.00480891	51.487	37.326	50.539	0.54533	54817000	NaN	1	1	NaN	51.487	50.539
P34932	285	P34932	P34932	Heat shock 70 kDa protein 4	HSPA4	CEKLKKLMSANASDLPLSIECFMNDVDVSGT	1649	P	3	2211		CEKLKKLMSA	N	A	S	D	L	P	L	S	I	E	C	FMNDVDVSGT	1	0.000148454	104.44	94.38	64.779	-0.43031	377570000	1	1	1	104.44	64.779	54.103
P34932	539	P34932	P34932	Heat shock 70 kDa protein 4	HSPA4	VDQEEPHVEEQQQQTPAENKAESEEMETSQA	1650	P	5	2211		VDQEEPHVEE	Q	Q	Q	Q	T	P	A	E	N	K	A	ESEEMETSQA	1	2.24e-18	143.72	143.72	143.72	-0.27381	702750000	1	0.994323	NaN	143.72	58.421	NaN
P34949	45	P34949	P34949	Mannose-6-phosphate isomerase	MPI	LLASSDPLAQIAEDKPYAELWMGTHPRGDAK	1652	P	3	2213		LLASSDPLAQ	I	A	E	D	K	P	Y	A	E	L	W	MGTHPRGDAK	0.999771	0.00043805	66.613	55.192	66.613	0.16189	399410000	0.999627	0.999771	NaN	44.167	66.613	NaN
P34949	55	P34949	P34949	Mannose-6-phosphate isomerase	MPI	IAEDKPYAELWMGTHPRGDAKILDNRISQKT	1653	P	4	2213		IAEDKPYAEL	W	M	G	T	H	P	R	G	D	A	K	ILDNRISQKT	0.999609	0.00043805	66.613	55.192	45.596	-0.28291	399410000	0.996004	0.999609	NaN	44.167	66.613	NaN
P34949	343	P34949	P34949	Mannose-6-phosphate isomerase	MPI	RSQEDPYLSIYDPPVPDFTIMKTEVPGSVTE	1654	P	2	2213		RSQEDPYLSI	Y	D	P	P	V	P	D	F	T	I	M	KTEVPGSVTE	0.935886	5.11e-08	122.56	117.02	122.56	-0.96914	269360000	0.935886	NaN	0.866613	122.56	NaN	102.26
P35221	585	P35221	P35221	Catenin alpha-1	CTNNA1	EKVLEATKLLSNTVMPRFTEQVEAAVEALSS	1655	P	3	2217		EKVLEATKLL	S	N	T	V	M	P	R	F	T	E	Q	VEAAVEALSS	1	6.79e-07	115.74	115.74	68.944	2.6447	1800000000	NaN	1	0.99999	NaN	115.74	99.907
P35222	100	P35222	P35222	Catenin beta-1	CTNNB1	QYAMTRAQRVRAAMFPETLDEGMQIPSTQFD	1656	P	3	2218		QYAMTRAQRV	R	A	A	M	F	P	E	T	L	D	E	GMQIPSTQFD	0.980794	0.00102821	52.122	50.032	52.122	-0.27663	47098000	0.980794	NaN	NaN	52.122	NaN	NaN
P35232	59	P35232	P35232	Prohibitin	PHB	GVQDIVVGEGTHFLIPWVQKPIIFDCRSRPR	1658	P	4	2220		GVQDIVVGEG	T	H	F	L	I	P	W	V	Q	K	P	IIFDCRSRPR	1	7.1e-06	122.53	106.46	74.65	1.6288	3411700000	1	1	1	105.46	122.53	89.773
P35232	64	P35232	P35232	Prohibitin	PHB	VVGEGTHFLIPWVQKPIIFDCRSRPRNVPVI	1659	P	4	2220		VVGEGTHFLI	P	W	V	Q	K	P	I	I	F	D	C	RSRPRNVPVI	1	7.1e-06	122.53	106.46	74.65	1.6288	3271200000	1	1	1	105.46	122.53	89.773
P35244	58	P35244	P35244	Replication protein A 14 kDa subunit	RPA3	LSDGEGKNGTIELMEPLDEEISGIVEVVGRV	1660	P	4	2224		LSDGEGKNGT	I	E	L	M	E	P	L	D	E	E	I	SGIVEVVGRV	1	5.99e-05	55.895	50.576	55.895	-2.1169	102980000	NaN	NaN	1	NaN	NaN	55.895
P35250	37	P35250	P35250	Replication factor C subunit 2	RFC2	PAFSKAPGSAGHYELPWVEKYRPVKLNEIVG	1661	P	3	2226		PAFSKAPGSA	G	H	Y	E	L	P	W	V	E	K	Y	RPVKLNEIVG	0.999997	0.00685929	66.673	50.855	66.673	-0.30317	24038000	0.999997	NaN	NaN	66.673	NaN	NaN
P35250	212	P35250	P35250	Replication factor C subunit 2	RFC2	QILTRLMNVIEKERVPYTDDGLEAIIFTAQG	1662	P	4	2226		QILTRLMNVI	E	K	E	R	V	P	Y	T	D	D	G	LEAIIFTAQG	1	6.7e-05	79.388	73.902	79.388	0.83327	496400000	NaN	NaN	1	NaN	NaN	79.388
P35251	945	P35251	P35251	Replication factor C subunit 1	RFC1	NWSLLPAQAIYASVLPGELMRGYMTQFPTFP	1666	P	3	2227		NWSLLPAQAI	Y	A	S	V	L	P	G	E	L	M	R	GYMTQFPTFP	0.999998	0.0160107	59.282	39.904	59.282	0.87284	121410000	NaN	NaN	0.999998	NaN	NaN	59.282
P35268	28	P35268	P35268	60S ribosomal protein L22	RPL22	KKKKQVLKFTLDCTHPVEDGIMDAANFEQFL	1667	P	3	2228		KKKKQVLKFT	L	D	C	T	H	P	V	E	D	G	I	MDAANFEQFL	1	0.00221784	56.303	49.799	56.303	-1.276	40032000	1	1	NaN	51.398	56.303	NaN
P35520	12	P35520	P35520	Cystathionine beta-synthase	CBS	____MPSETPQAEVGPTGCPHRSGPHSAKGS	1668	P	3	2232		____MPSETP	Q	A	E	V	G	P	T	G	C	P	H	RSGPHSAKGS	0.557378	0.00543752	62.525	51.15	62.525	-0.26733	86693000	0.557378	NaN	NaN	62.525	NaN	NaN
P35579	311	P35579	P35579	Myosin-9	MYH9	PYNKYRFLSNGHVTIPGQQDKDMFQETMEAM	1672	P	4	2237		PYNKYRFLSN	G	H	V	T	I	P	G	Q	Q	D	K	DMFQETMEAM	1	3.96e-05	85.376	79.757	43.895	-1.8438	2500800000	1	1	1	69.152	85.376	56.468
P35579	148	P35579	P35579	Myosin-9	MYH9	EIVEMYKGKKRHEMPPHIYAITDTAYRSMMQ	1674	P	4	2237		EIVEMYKGKK	R	H	E	M	P	P	H	I	Y	A	I	TDTAYRSMMQ	0.581664	0.000110346	101.13	93.291	89.982	-0.57514	5192800000	0.556985	0.581664	0.551394	101.13	98.759	82.102
P35579	332	P35579	P35579	Myosin-9	MYH9	DMFQETMEAMRIMGIPEEEQMGLLRVISGVL	1675	P	2	2237		DMFQETMEAM	R	I	M	G	I	P	E	E	E	Q	M	GLLRVISGVL	1	0.00723628	70.829	66.36	53.683	1.8389	91912000	NaN	1	1	NaN	70.829	53.683
P35580	152	P35580	P35580	Myosin-10	MYH10	NIIEMYRGKKRHEMPPHIYAISESAYRCMLQ	1677	P	4	2238		NIIEMYRGKK	R	H	E	M	P	P	H	I	Y	A	I	SESAYRCMLQ	0.577199	0.000700215	87.16	78.341	87.16	-0.80073	819410000	0.5	0.5	0.577199	58.671	59.372	87.16
P35606	820	P35606	P35606	Coatomer subunit beta'	COPB2	FVVEEWVKETHADLWPAKQYPLVTPNEERNV	1678	P	5	2239		FVVEEWVKET	H	A	D	L	W	P	A	K	Q	Y	P	LVTPNEERNV	0.827564	0.000250307	41.218	33.901	41.218	-3.7491	435780000	0.827564	NaN	NaN	41.218	NaN	NaN
P35606	829	P35606	P35606	Coatomer subunit beta'	COPB2	THADLWPAKQYPLVTPNEERNVMEEGKDFQP	1679	P	4	2239		THADLWPAKQ	Y	P	L	V	T	P	N	E	E	R	N	VMEEGKDFQP	0.995057	0.00490537	55.985	49.262	55.985	-1.3009	65990000	NaN	0.995057	NaN	NaN	55.985	NaN
P35611	491	P35611	P35611	Alpha-adducin	ADD1	DGHRTSTSAVPNLFVPLNTNPKEVQEMRNKI	1681	P	5	2242		DGHRTSTSAV	P	N	L	F	V	P	L	N	T	N	P	KEVQEMRNKI	0.588808	0.00267234	45.862	40.543	45.862	-0.30115	17941000	NaN	0.588808	NaN	NaN	45.862	NaN
P35637	459	P35637	P35637	RNA-binding protein FUS	FUS	CNQCKAPKPDGPGGGPGGSHMGGNYGDDRRG	1682	P	4	2246		CNQCKAPKPD	G	P	G	G	G	P	G	G	S	H	M	GGNYGDDRRG	0.995606	0.00264747	84.842	78.811	43.888	-0.39647	954590000	0.995606	NaN	0.994955	45.885	NaN	84.842
P35658	568	P35658	P35658	Nuclear pore complex protein Nup214	NUP214	FKPTLESTPVPSVSAPNIAMKPSFPPSTSAV	1684	P	4	2247		FKPTLESTPV	P	S	V	S	A	P	N	I	A	M	K	PSFPPSTSAV	0.995727	4.61e-05	44.519	41.383	44.519	3.2545	20745000	0.995727	NaN	NaN	44.519	NaN	NaN
P35658	10	P35658	P35658	Nuclear pore complex protein Nup214	NUP214	______MGDEMDAMIPEREMKDFQFRALKKV	1685	P	3	2247		______MGDE	M	D	A	M	I	P	E	R	E	M	K	DFQFRALKKV	1	0.000528323	61.648	58.458	50.957	1.0988	63794000	1	NaN	1	50.957	NaN	61.648
P35659	17	P35659	P35659	Protein DEK	DEK	SASAPAAEGEGTPTQPASEKEPEMPGPREES	1688	P	3	2248		SASAPAAEGE	G	T	P	T	Q	P	A	S	E	K	E	PEMPGPREES	0.711807	9.24e-05	65.753	58.722	65.753	-0.88184	0	0.711807	0.215425	NaN	65.753	45.596	NaN
P35998	159	P35998	P35998	26S protease regulatory subunit 7	PSMC2	RNKYQIHIPLPPKIDPTVTMMQVEEKPDVTY	1689	P	4	2259		RNKYQIHIPL	P	P	K	I	D	P	T	V	T	M	M	QVEEKPDVTY	0.999913	2.41e-05	75.758	70.271	75.758	-0.5138	95086000	0.999913	NaN	NaN	75.758	NaN	NaN
P35998	311	P35998	P35998	26S protease regulatory subunit 7	PSMC2	QRTMLELINQLDGFDPRGNIKVLMATNRPDT	1692	P	2	2259		QRTMLELINQ	L	D	G	F	D	P	R	G	N	I	K	VLMATNRPDT	1	1.07e-30	204.48	163.08	200.21	0.40609	920440000	1	1	1	200.21	204.48	164.22
P36551	410	P36551	P36551	Oxygen-dependent coproporphyrinogen-III oxidase, mitochondrial	CPOX	FNLLYDRGTKFGLFTPGSRIESILMSLPLTA	1694	P	5	2269		FNLLYDRGTK	F	G	L	F	T	P	G	S	R	I	E	SILMSLPLTA	0.972105	0.000633362	47.241	43.008	47.241	0.10913	113300000	NaN	0.972105	NaN	NaN	47.241	NaN
P36551	422	P36551	P36551	Oxygen-dependent coproporphyrinogen-III oxidase, mitochondrial	CPOX	LFTPGSRIESILMSLPLTARWEYMHSPSENS	1695	P	4	2269		LFTPGSRIES	I	L	M	S	L	P	L	T	A	R	W	EYMHSPSENS	1	0.000472758	65.425	65.425	42.041	-1.2707	151930000	0.813617	1	0.994101	42.806	42.041	65.425
P36551	433	P36551	P36551	Oxygen-dependent coproporphyrinogen-III oxidase, mitochondrial	CPOX	LMSLPLTARWEYMHSPSENSKEAEILEVLRH	1696	P	4	2269		LMSLPLTARW	E	Y	M	H	S	P	S	E	N	S	K	EAEILEVLRH	1	0.00909801	42.041	30.391	42.041	-1.2707	15185000	0	1	0	NaN	42.041	NaN
P36776	830	P36776	P36776	Lon protease homolog, mitochondrial	LONP1	RIAYTFARAFLMQHAPANDYLVTSHIHLHVP	1698	P	5	2272		RIAYTFARAF	L	M	Q	H	A	P	A	N	D	Y	L	VTSHIHLHVP	0.999932	0.000474949	51.119	42.131	49.088	0.25795	1468500000	0.999538	0.999889	0.999932	40.044	51.119	49.088
P36776	872	P36776	P36776	Lon protease homolog, mitochondrial	LONP1	GCTIVTALLSLAMGRPVRQNLAMTGEVSLTG	1699	P	3	2272		GCTIVTALLS	L	A	M	G	R	P	V	R	Q	N	L	AMTGEVSLTG	1	5.6e-07	102.43	86.927	102.43	0.1714	187290000	NaN	1	0.999995	NaN	102.43	58.457
P36776	308	P36776	P36776	Lon protease homolog, mitochondrial	LONP1	TAEIVKTIRDIIALNPLYRESVLQMMQAGQR	1700	P	3	2272		TAEIVKTIRD	I	I	A	L	N	P	L	Y	R	E	S	VLQMMQAGQR	1	0.00118162	66.644	51.515	66.644	-1.3659	24835000	NaN	NaN	1	NaN	NaN	66.644
P36776	646	P36776	P36776	Lon protease homolog, mitochondrial	LONP1	SKVLFICTANVTDTIPEPLRDRMEMINVSGY	1701	P	4	2272		SKVLFICTAN	V	T	D	T	I	P	E	P	L	R	D	RMEMINVSGY	0.53411	0.000844221	48.085	48.085	48.085	0.80934	45365000	NaN	0.53411	NaN	NaN	48.085	NaN
P37198	316	P37198	P37198	Nuclear pore glycoprotein p62	NUP62	GIPSNTAAAVTAPPGPGAAAGAAASSAMTYA	1705	P	4	2287		GIPSNTAAAV	T	A	P	P	G	P	G	A	A	A	G	AAASSAMTYA	0.612978	4.05e-16	79.385	76.736	79.385	0.35525	69583000	NaN	0.332874	0.612978	NaN	51.604	79.385
P37802	148	P37802	P37802	Transgelin-2	TAGLN2	GGLAVARDDGLFSGDPNWFPKKSKENPRNFS	1706	P	4	2293		GGLAVARDDG	L	F	S	G	D	P	N	W	F	P	K	KSKENPRNFS	1	7.64e-28	162.82	143.09	82.342	0.14955	3471900000	1	1	1	162.82	119.32	82.342
P37802	152	P37802	P37802	Transgelin-2	TAGLN2	VARDDGLFSGDPNWFPKKSKENPRNFSDNQL	1707	P	4	2293		VARDDGLFSG	D	P	N	W	F	P	K	K	S	K	E	NPRNFSDNQL	1	7.64e-28	162.82	143.09	82.342	0.14955	3471900000	1	1	1	162.82	119.32	82.342
P37802;Q9UI15	195;195	P37802;Q9UI15	P37802	Transgelin-2;Transgelin-3	TAGLN2;TAGLN3	SNKGASQAGMTGYGMPRQIM___________;TNRGASQAGMTGYGMPRQIL___________	1708	P	2	2293;9070		SNKGASQAGM	T	G	Y	G	M	P	R	Q	I	M	_	__________	1	0.00128536	107.79	105.25	107.79	-0.52778	53658000	1	NaN	1	77.744	NaN	107.79
P38117	68	P38117	P38117	Electron transfer flavoprotein subunit beta	ETFB	KEKKLVKEVIAVSCGPAQCQETIRTALAMGA	1709	P	3	2296		KEKKLVKEVI	A	V	S	C	G	P	A	Q	C	Q	E	TIRTALAMGA	1	0.00330431	88.187	72.647	59.673	-0.13304	203660000	1	1	1	88.187	68.481	59.673
P38117	40	P38117	P38117	Electron transfer flavoprotein subunit beta	ETFB	DRTGVVTDGVKHSMNPFCEIAVEEAVRLKEK	1710	P	4	2296		DRTGVVTDGV	K	H	S	M	N	P	F	C	E	I	A	VEEAVRLKEK	1	0.000142044	76.691	64.839	76.691	-0.17842	136800000	1	1	NaN	46.543	76.691	NaN
P38117	145	P38117	P38117	Electron transfer flavoprotein subunit beta	ETFB	DCNQTGQMTAGFLDWPQGTFASQVTLEGDKL	1711	P	5	2296		DCNQTGQMTA	G	F	L	D	W	P	Q	G	T	F	A	SQVTLEGDKL	1	0.000100554	55.336	54.058	55.336	2.609	22948000	NaN	1	NaN	NaN	55.336	NaN
P38606	239	P38606	P38606	V-type proton ATPase catalytic subunit A	ATP6V1A	NHPLLTGQRVLDALFPCVQGGTTAIPGAFGC	1713	P	3	2302		NHPLLTGQRV	L	D	A	L	F	P	C	V	Q	G	G	TTAIPGAFGC	0.997471	0.0235128	44.258	39.773	44.258	-0.13345	47193000	0.997471	NaN	NaN	44.258	NaN	NaN
P38646	339	P38646	P38646	Stress-70 protein, mitochondrial	HSPA9	QTDINLPYLTMDSSGPKHLNMKLTRAQFEGI	1714	P	3	2303		QTDINLPYLT	M	D	S	S	G	P	K	H	L	N	M	KLTRAQFEGI	0.985114	0.0246244	50.499	45.521	50.499	-0.56612	28786000	NaN	0.985114	NaN	NaN	50.499	NaN
P38646	104	P38646	P38646	Stress-70 protein, mitochondrial	HSPA9	SVVAFTADGERLVGMPAKRQAVTNPNNTFYA	1715	P	3	2303		SVVAFTADGE	R	L	V	G	M	P	A	K	R	Q	A	VTNPNNTFYA	0.999977	0.027728	50.425	41.378	50.425	0.12684	877450000	NaN	NaN	0.999977	NaN	NaN	50.425
P38919	312	P38919	P38919	Eukaryotic initiation factor 4A-III;Eukaryotic initiation factor 4A-III, N-terminally processed	EIF4A3	MREANFTVSSMHGDMPQKERESIMKEFRSGA	1716	P	4	2304		MREANFTVSS	M	H	G	D	M	P	Q	K	E	R	E	SIMKEFRSGA	1	0.000513617	80.316	70.176	54.117	-0.34792	721050000	1	1	1	77.391	80.316	76.586
P38919	164	P38919	P38919	Eukaryotic initiation factor 4A-III;Eukaryotic initiation factor 4A-III, N-terminally processed	EIF4A3	DIRKLDYGQHVVAGTPGRVFDMIRRRSLRTR	1718	P	4	2304		DIRKLDYGQH	V	V	A	G	T	P	G	R	V	F	D	MIRRRSLRTR	1	0.0060066	54.668	40.796	54.668	-0.15315	15312000	1	NaN	NaN	54.668	NaN	NaN
P38919	222	P38919	P38919	Eukaryotic initiation factor 4A-III;Eukaryotic initiation factor 4A-III, N-terminally processed	EIF4A3	YLPPATQVVLISATLPHEILEMTNKFMTDPI	1719	P	3	2304		YLPPATQVVL	I	S	A	T	L	P	H	E	I	L	E	MTNKFMTDPI	0.82423	1.35e-06	64.176	64.176	64.176	0.34901	58339000	NaN	NaN	0.82423	NaN	NaN	64.176
P39019	2	P39019	P39019	40S ribosomal protein S19	RPS19	______________MPGVTVKDVNQQEFVRA	1720	P	2	2307		__________	_	_	_	_	M	P	G	V	T	V	K	DVNQQEFVRA	1	0.000863117	73.666	43.116	73.666	-1.8461	0	NaN	NaN	1	NaN	NaN	73.666
P39880	985	P39880	P39880	Homeobox protein cut-like 1	CUX1	VLGLSQGSVSDMLSRPKPWSKLTQKGREPFI	1724	P	4	2314		VLGLSQGSVS	D	M	L	S	R	P	K	P	W	S	K	LTQKGREPFI	0.848466	0.00751136	57.009	48.619	57.009	-0.33022	189040000	0.848466	0.843165	0.791559	57.009	54.225	40.81
P40222	505	P40222	P40222	Alpha-taxilin	TXLNA	AGGQGSLTDSGPERRPEGPGAQAPSSPRVTE	1726	P	4	2318		AGGQGSLTDS	G	P	E	R	R	P	E	G	P	G	A	QAPSSPRVTE	0.856813	6.17e-05	46.186	46.186	46.186	0.58136	73058000	0.533268	0.856813	NaN	40.163	46.186	NaN
P40222	508	P40222	P40222	Alpha-taxilin	TXLNA	QGSLTDSGPERRPEGPGAQAPSSPRVTEAPC	1727	P	4	2318		QGSLTDSGPE	R	R	P	E	G	P	G	A	Q	A	P	SSPRVTEAPC	0.933447	6.17e-05	46.186	46.186	42.015	1.0365	85883000	0.859788	0.933447	0.831554	40.163	46.186	40.056
P40222	513	P40222	P40222	Alpha-taxilin	TXLNA	DSGPERRPEGPGAQAPSSPRVTEAPCYPGAP	1728	P	4	2318		DSGPERRPEG	P	G	A	Q	A	P	S	S	P	R	V	TEAPCYPGAP	0.98097	6.17e-05	46.186	46.186	46.186	0.58136	85883000	0.856266	0.98097	0.820414	40.163	46.186	40.056
P40222	516	P40222	P40222	Alpha-taxilin	TXLNA	PERRPEGPGAQAPSSPRVTEAPCYPGAPSTE	1729	P	4	2318		PERRPEGPGA	Q	A	P	S	S	P	R	V	T	E	A	PCYPGAPSTE	0.98097	6.17e-05	46.186	46.186	46.186	0.58136	85883000	0.856266	0.98097	0.820414	40.163	46.186	40.056
P40222	522	P40222	P40222	Alpha-taxilin	TXLNA	GPGAQAPSSPRVTEAPCYPGAPSTEASGQTG	1730	P	4	2318		GPGAQAPSSP	R	V	T	E	A	P	C	Y	P	G	A	PSTEASGQTG	0.98097	6.17e-05	47.507	44.678	46.186	0.58136	85883000	0.856266	0.98097	0.820414	47.507	46.186	40.056
P40222	525	P40222	P40222	Alpha-taxilin	TXLNA	AQAPSSPRVTEAPCYPGAPSTEASGQTGPQE	1731	P	4	2318		AQAPSSPRVT	E	A	P	C	Y	P	G	A	P	S	T	EASGQTGPQE	0.787817	0.000172407	47.507	44.678	40.056	-0.54	35932000	0.333221	0	0.787817	47.507	NaN	40.056
P40222	20	P40222	P40222	Alpha-taxilin	TXLNA	DKKNGAAKQSNPKSSPGQPEAGPEGAQERPS	1732	P	4	2318		DKKNGAAKQS	N	P	K	S	S	P	G	Q	P	E	A	GPEGAQERPS	0.99976	0.000209968	46.608	44.773	46.608	-0.58157	26613000	0.99976	NaN	NaN	46.608	NaN	NaN
P40222	23	P40222	P40222	Alpha-taxilin	TXLNA	NGAAKQSNPKSSPGQPEAGPEGAQERPSQAA	1733	P	4	2318		NGAAKQSNPK	S	S	P	G	Q	P	E	A	G	P	E	GAQERPSQAA	0.99976	0.000209968	46.608	44.773	46.608	-0.58157	26613000	0.99976	NaN	NaN	46.608	NaN	NaN
P40222	27	P40222	P40222	Alpha-taxilin	TXLNA	KQSNPKSSPGQPEAGPEGAQERPSQAAPAVE	1734	P	4	2318		KQSNPKSSPG	Q	P	E	A	G	P	E	G	A	Q	E	RPSQAAPAVE	0.99976	0.000209968	46.608	44.773	46.608	-0.58157	26613000	0.99976	NaN	NaN	46.608	NaN	NaN
P40222	34	P40222	P40222	Alpha-taxilin	TXLNA	SPGQPEAGPEGAQERPSQAAPAVEAEGPGSS	1735	P	4	2318		SPGQPEAGPE	G	A	Q	E	R	P	S	Q	A	A	P	AVEAEGPGSS	0.99976	0.000209968	46.608	44.773	46.608	-0.58157	26613000	0.99976	NaN	NaN	46.608	NaN	NaN
P40222	39	P40222	P40222	Alpha-taxilin	TXLNA	EAGPEGAQERPSQAAPAVEAEGPGSSQAPRK	1736	P	4	2318		EAGPEGAQER	P	S	Q	A	A	P	A	V	E	A	E	GPGSSQAPRK	0.99976	0.000209968	46.608	44.773	46.608	-0.58157	26613000	0.99976	NaN	NaN	46.608	NaN	NaN
P40227	72	P40227	P40227	T-complex protein 1 subunit zeta	CCT6A	TKDGNVLLHEMQIQHPTASLIAKVATAQDDI	1737	P	4	2319		TKDGNVLLHE	M	Q	I	Q	H	P	T	A	S	L	I	AKVATAQDDI	1	0.0182489	43.799	40.56	43.799	-0.39883	23969000	NaN	NaN	1	NaN	NaN	43.799
P40227	409	P40227	P40227	T-complex protein 1 subunit zeta	CCT6A	GLRAVKNAIDDGCVVPGAGAVEVAMAEALIK	1738	P	3	2319		GLRAVKNAID	D	G	C	V	V	P	G	A	G	A	V	EVAMAEALIK	1	0.00275468	56.947	49.501	56.947	-1.7895	24310000	NaN	NaN	1	NaN	NaN	56.947
P40425	381	P40425	P40425	Pre-B-cell leukemia transcription factor 2	PBX2	SYSASQVESLRHSMGPGGYGDNLGGGQMYSP	1739	P	3	2322		SYSASQVESL	R	H	S	M	G	P	G	G	Y	G	D	NLGGGQMYSP	0.991011	0.00477269	52.909	52.909	52.909	-1.1634	19715000	NaN	NaN	0.991011	NaN	NaN	52.909
P40763	728	P40763	P40763	Signal transducer and activator of transcription 3	STAT3	VTPTTCSNTIDLPMSPRTLDSLMQFGNNGEG	1741	P	3	2327		VTPTTCSNTI	D	L	P	M	S	P	R	T	L	D	S	LMQFGNNGEG	0.55987	0.00219958	65.47	61.807	47.752	0.39667	169950000	NaN	0.536765	0.55987	NaN	65.47	56.54
P40925	91	P40925	P40925	Malate dehydrogenase, cytoplasmic	MDH1	VAFKDLDVAILVGSMPRREGMERKDLLKANV	1742	P	2	2330		VAFKDLDVAI	L	V	G	S	M	P	R	R	E	G	M	ERKDLLKANV	1	0.0260406	73.067	58.86	73.067	1.351	222600	NaN	1	NaN	NaN	73.067	NaN
P40926	207	P40926	P40926	Malate dehydrogenase, mitochondrial	MDH2	VNVPVIGGHAGKTIIPLISQCTPKVDFPQDQ	1743	P	3	2331		VNVPVIGGHA	G	K	T	I	I	P	L	I	S	Q	C	TPKVDFPQDQ	0.638365	0.00448891	68.361	56.508	55.063	2.7529	44544000	NaN	0.638365	NaN	NaN	68.361	NaN
P40937	184	P40937	P40937	Replication factor C subunit 5	RFC5	CTRFRFGPLTPELMVPRLEHVVEEEKVDISE	1745	P	5	2332		CTRFRFGPLT	P	E	L	M	V	P	R	L	E	H	V	VEEEKVDISE	0.895585	0.00111123	51.296	45.809	46.412	-0.32518	236670000	0.515337	0.895585	NaN	51.296	46.412	NaN
P40939	467	P40939	P40939	Trifunctional enzyme subunit alpha, mitochondrial;Long-chain enoyl-CoA hydratase;Long chain 3-hydroxyacyl-CoA dehydrogenase	HADHA	LSLKHRVLKEVEAVIPDHCIFASNTSALPIS	1746	P	3	2334		LSLKHRVLKE	V	E	A	V	I	P	D	H	C	I	F	ASNTSALPIS	0.999485	4.09e-05	81.97	76.758	81.97	0.23958	223910000	0.999485	NaN	NaN	81.97	NaN	NaN
P40939	502	P40939	P40939	Trifunctional enzyme subunit alpha, mitochondrial;Long-chain enoyl-CoA hydratase;Long chain 3-hydroxyacyl-CoA dehydrogenase	HADHA	VSKRPEKVIGMHYFSPVDKMQLLEIITTEKT	1747	P	5	2334		VSKRPEKVIG	M	H	Y	F	S	P	V	D	K	M	Q	LLEIITTEKT	1	0.0052901	55.67	45.059	53.475	-0.37936	114410000	NaN	1	1	NaN	55.67	53.475
P41091;Q2VIR3	432;432	P41091	P41091	Eukaryotic translation initiation factor 2 subunit 3;Putative eukaryotic translation initiation factor 2 subunit 3-like protein	EIF2S3;EIF2S3L	VSAVKADLGKIVLTNPVCTEVGEKIALSRRV	1748	P	2	2336		VSAVKADLGK	I	V	L	T	N	P	V	C	T	E	V	GEKIALSRRV	1	0.0295205	107.83	88.375	107.83	0.41586	12940000	NaN	1	NaN	NaN	107.83	NaN
P41227	8	P41227	P41227	N-alpha-acetyltransferase 10	NAA10	________MNIRNARPEDLMNMQHCNLLCLP	1749	P	4	2347		________MN	I	R	N	A	R	P	E	D	L	M	N	MQHCNLLCLP	1	5.27e-09	128.2	128.2	48.867	-0.035439	295190000	1	0.999905	0.999998	128.2	48.771	75.23
P41227	23	P41227	P41227	N-alpha-acetyltransferase 10	NAA10	PEDLMNMQHCNLLCLPENYQMKYYFYHGLSW	1750	P	4	2347		PEDLMNMQHC	N	L	L	C	L	P	E	N	Y	Q	M	KYYFYHGLSW	1	0.00354042	48.867	48.867	48.867	-0.035439	13302000	1	NaN	NaN	48.867	NaN	NaN
P41229	573	P41229	P41229	Lysine-specific demethylase 5C	KDM5C	DSQPDLLHQLVTLMNPNTLMSHGVPVVRTNQ	1751	P	4	2348		DSQPDLLHQL	V	T	L	M	N	P	N	T	L	M	S	HGVPVVRTNQ	0.997568	5.99e-08	65.736	65.736	65.736	-0.60291	96250000	0.997568	NaN	NaN	65.736	NaN	NaN
P41240	349	P41240	P41240	Tyrosine-protein kinase CSK	CSK	GLTKEASSTQDTGKLPVKWTAPEALREKKFS	1754	P	4	2350		GLTKEASSTQ	D	T	G	K	L	P	V	K	W	T	A	PEALREKKFS	1	0.0351706	53.553	39.391	53.553	1.3419	36666000	1	NaN	NaN	53.553	NaN	NaN
P41240	355	P41240	P41240	Tyrosine-protein kinase CSK	CSK	SSTQDTGKLPVKWTAPEALREKKFSTKSDVW	1755	P	4	2350		SSTQDTGKLP	V	K	W	T	A	P	E	A	L	R	E	KKFSTKSDVW	1	0.0351706	53.553	39.391	53.553	1.3419	36666000	1	NaN	NaN	53.553	NaN	NaN
P41250	288	P41250	P41250	Glycine--tRNA ligase	GARS	SPPVSFNLMFKTFIGPGGNMPGYLRPETAQG	1756	P	4	2352		SPPVSFNLMF	K	T	F	I	G	P	G	G	N	M	P	GYLRPETAQG	0.949476	0.000223515	77.235	74.748	66.613	-1.7529	2234700000	NaN	0.949476	0.860068	NaN	77.235	47.745
P41252	348	P41252	P41252	Isoleucine--tRNA ligase, cytoplasmic	IARS	YRVCMDFNIIRKDSLPVCPVDASGCFTTEVT	1757	P	3	2353		YRVCMDFNII	R	K	D	S	L	P	V	C	P	V	D	ASGCFTTEVT	0.525677	0.00709578	47.52	45.047	46.404	-1.0958	15426000	0.525677	NaN	0.516317	46.404	NaN	47.52
P41252	351	P41252	P41252	Isoleucine--tRNA ligase, cytoplasmic	IARS	CMDFNIIRKDSLPVCPVDASGCFTTEVTDFA	1758	P	3	2353		CMDFNIIRKD	S	L	P	V	C	P	V	D	A	S	G	CFTTEVTDFA	0.974408	0.00607825	48.286	45.813	43.696	-2.3699	14800000	0.974408	NaN	0.967505	43.696	NaN	48.286
P41252	807	P41252	P41252	Isoleucine--tRNA ligase, cytoplasmic	IARS	SVQDKDTLSIHYLMLPRVREELIDKKTESAV	1759	P	3	2353		SVQDKDTLSI	H	Y	L	M	L	P	R	V	R	E	E	LIDKKTESAV	1	8.3e-09	113.26	110.05	51.013	0.26448	3769100000	1	1	0.999989	113.26	100.76	69.947
P41252	91	P41252	P41252	Isoleucine--tRNA ligase, cytoplasmic	IARS	GFHVDRRFGWDCHGLPVEYEIDKTLGIRGPE	1760	P	5	2353		GFHVDRRFGW	D	C	H	G	L	P	V	E	Y	E	I	DKTLGIRGPE	1	6.44e-05	82.342	76.681	82.342	-0.95223	104020000	NaN	1	1	NaN	69.152	82.342
P41252	771	P41252	P41252	Isoleucine--tRNA ligase, cytoplasmic	IARS	ETLFSVLLSLCRLMAPYTPFLTELMYQNLKV	1761	P	3	2353		ETLFSVLLSL	C	R	L	M	A	P	Y	T	P	F	L	TELMYQNLKV	0.99728	5.39e-05	99.238	99.238	99.238	-0.04908	27735000	NaN	NaN	0.99728	NaN	NaN	99.238
P41743	2	P41743	P41743	Protein kinase C iota type	PRKCI	______________MPTQRDSSTMSHTVAGG	1763	P	4	2357		__________	_	_	_	_	M	P	T	Q	R	D	S	STMSHTVAGG	1	0.0118748	41.763	38.664	41.763	-1.4302	6894000	1	NaN	NaN	41.763	NaN	NaN
P42025;P61163	177;177	P42025;P61163	P61163	Beta-centractin;Alpha-centractin	ACTR1B;ACTR1A	DGVTHAVPIYEGFAMPHSIMRIDIAGRDVSR;DGVTHAVPIYEGFAMPHSIMRVDIAGRDVSR	1764	P	4	2358;2925		DGVTHAVPIY	E	G	F	A	M	P	H	S	I	M	R	IDIAGRDVSR	0.999983	1.38e-05	86.953	86.953	69.427	0.85447	222040000	0.999336	0.999983	0.998456	86.953	69.427	63.323
P42126	186	P42126	P42126	Enoyl-CoA delta isomerase 1, mitochondrial	ECI1	RYCIGLNETQLGIIAPFWLKDTLENTIGHRA	1765	P	4	2359		RYCIGLNETQ	L	G	I	I	A	P	F	W	L	K	D	TLENTIGHRA	1	2.08e-06	86.32	81.788	86.32	-3.64	31218000	1	NaN	NaN	86.32	NaN	NaN
P42166	298	P42166	P42166	Lamina-associated polypeptide 2, isoform alpha;Thymopoietin;Thymopentin	TMPO	SHDRCLEKSSSSSSQPEHSAMLVSTAASPSL	1766	P	3	2360		SHDRCLEKSS	S	S	S	S	Q	P	E	H	S	A	M	LVSTAASPSL	1	3.26e-11	95.571	92.002	84.404	-0.33745	310240000	0.999997	1	0.999993	95.571	84.404	84.107
P42285	545	P42285	P42285	Superkiller viralicidic activity 2-like 2	SKIV2L2	DDRGIVILMVDEKMSPTIGKQLLKGSADPLN	1767	P	4	2363		DDRGIVILMV	D	E	K	M	S	P	T	I	G	K	Q	LLKGSADPLN	1	0.00187713	67.364	60.171	49.593	-1.2453	315620000	NaN	1	1	NaN	49.593	67.364
P42285	808	P42285	P42285	Superkiller viralicidic activity 2-like 2	SKIV2L2	VIQKVEAFEHRMYSHPLHNDPNLETVYTLCE	1768	P	4	2363		VIQKVEAFEH	R	M	Y	S	H	P	L	H	N	D	P	NLETVYTLCE	0.89067	0.000718082	62.663	60.121	62.663	-0.60539	38200000	NaN	0.89067	NaN	NaN	62.663	NaN
P42285	717	P42285	P42285	Superkiller viralicidic activity 2-like 2	SKIV2L2	CSKESLKNSATEAAKPAKPDEKGEMQVVPVL	1769	P	5	2363		CSKESLKNSA	T	E	A	A	K	P	A	K	P	D	E	KGEMQVVPVL	0.515697	0.00119173	53.55	47.117	53.55	-0.74146	184900000	0	NaN	0.515697	NaN	NaN	53.55
P42285	720	P42285	P42285	Superkiller viralicidic activity 2-like 2	SKIV2L2	ESLKNSATEAAKPAKPDEKGEMQVVPVLVHL	1770	P	4	2363		ESLKNSATEA	A	K	P	A	K	P	D	E	K	G	E	MQVVPVLVHL	0.999233	1.87e-05	114.83	102.86	114.83	-0.40543	1456600000	0.999233	0.979345	0.990393	114.83	97.441	111.93
P42345	786	P42345	P42345	Serine/threonine-protein kinase mTOR	MTOR	YMEPILKALILKLKDPDPDPNPGVINNVLAT	1771	P	3	2366		YMEPILKALI	L	K	L	K	D	P	D	P	D	P	N	PGVINNVLAT	0.999682	0.00478836	40.986	25.824	40.986	3.7713	37551000	0.999682	NaN	NaN	40.986	NaN	NaN
P42345	788	P42345	P42345	Serine/threonine-protein kinase mTOR	MTOR	EPILKALILKLKDPDPDPNPGVINNVLATIG	1772	P	3	2366		EPILKALILK	L	K	D	P	D	P	D	P	N	P	G	VINNVLATIG	0.98437	0.00478836	40.986	25.824	40.986	3.7713	37551000	0.98437	NaN	NaN	40.986	NaN	NaN
P42345	790	P42345	P42345	Serine/threonine-protein kinase mTOR	MTOR	ILKALILKLKDPDPDPNPGVINNVLATIGEL	1773	P	3	2366		ILKALILKLK	D	P	D	P	D	P	N	P	G	V	I	NNVLATIGEL	0.507974	0.00478836	40.986	25.824	40.986	3.7713	37551000	0.507974	NaN	NaN	40.986	NaN	NaN
P42345	792	P42345	P42345	Serine/threonine-protein kinase mTOR	MTOR	KALILKLKDPDPDPNPGVINNVLATIGELAQ	1774	P	3	2366		KALILKLKDP	D	P	D	P	N	P	G	V	I	N	N	VLATIGELAQ	0.507974	0.00478836	40.986	25.824	40.986	3.7713	37551000	0.507974	NaN	NaN	40.986	NaN	NaN
P42345	2341	P42345	P42345	Serine/threonine-protein kinase mTOR	MTOR	VMSMVGYILGLGDRHPSNLMLDRLSGKILHI	1775	P	4	2366		VMSMVGYILG	L	G	D	R	H	P	S	N	L	M	L	DRLSGKILHI	1	0.0126144	55.063	43.958	55.063	-2.1172	54701000	NaN	1	NaN	NaN	55.063	NaN
P42345	1694	P42345	P42345	Serine/threonine-protein kinase mTOR	MTOR	VDPSRQLDHPLPTVHPQVTYAYMKNMWKSAR	1776	P	5	2366		VDPSRQLDHP	L	P	T	V	H	P	Q	V	T	Y	A	YMKNMWKSAR	0.755741	0.000181003	54.324	52.662	54.324	0.48824	27438000	NaN	0.755741	NaN	NaN	54.324	NaN
P42679	424	P42679	P42679	Megakaryocyte-associated tyrosine-protein kinase	MATK	SFGVLLWEVFSYGRAPYPKMSLKEVSEAVEK	1777	P	3	2373		SFGVLLWEVF	S	Y	G	R	A	P	Y	P	K	M	S	LKEVSEAVEK	1	0.0222263	47.545	20.396	42.338	-3.638	54362000	NaN	1	NaN	NaN	47.545	NaN
P42694	618	P42694	P42694	Probable helicase with zinc finger domain	HELZ	MHYALDRIKDNGVLFPDISMTPTIPWSPNRQ	1779	P	3	2376		MHYALDRIKD	N	G	V	L	F	P	D	I	S	M	T	PTIPWSPNRQ	0.993134	0.0183854	51.645	44.692	51.645	2.5269	19381000	0.993134	NaN	NaN	51.645	NaN	NaN
P42704	436	P42704	P42704	Leucine-rich PPR motif-containing protein, mitochondrial	LRPPRC	DLAKALMKAVKEEGFPIRPHYFWPLLVGRRK	1781	P	5	2380		DLAKALMKAV	K	E	E	G	F	P	I	R	P	H	Y	FWPLLVGRRK	0.986376	0.000616543	80.156	72.963	55.453	0.50662	1505200000	0.985331	0.986376	NaN	53.909	80.156	NaN
P42704	439	P42704	P42704	Leucine-rich PPR motif-containing protein, mitochondrial	LRPPRC	KALMKAVKEEGFPIRPHYFWPLLVGRRKEKN	1782	P	4	2380		KALMKAVKEE	G	F	P	I	R	P	H	Y	F	W	P	LLVGRRKEKN	0.986213	0.000616543	80.156	72.963	55.007	-0.034786	1505200000	0.985331	0.986213	NaN	53.909	80.156	NaN
P42704	472	P42704	P42704	Leucine-rich PPR motif-containing protein, mitochondrial	LRPPRC	GIIEILKGMQELGVHPDQETYTDYVIPCFDS	1783	P	4	2380		GIIEILKGMQ	E	L	G	V	H	P	D	Q	E	T	Y	TDYVIPCFDS	0.998579	0.00313494	43.31	38.688	43.291	-0.74943	104030000	NaN	0.9935	0.998579	NaN	43.31	43.291
P42704	406	P42704	P42704	Leucine-rich PPR motif-containing protein, mitochondrial	LRPPRC	TDYCKKLKEVQMHSFPLQFTLHCALLANKTD	1784	P	3	2380		TDYCKKLKEV	Q	M	H	S	F	P	L	Q	F	T	L	HCALLANKTD	1	0.000103777	69.444	60.143	69.444	0.14775	292260000	1	1	NaN	68.43	69.444	NaN
P42704	1312	P42704	P42704	Leucine-rich PPR motif-containing protein, mitochondrial	LRPPRC	KQGKASTVKSVLELIPELNEKEEAYNSLMKS	1785	P	3	2380		KQGKASTVKS	V	L	E	L	I	P	E	L	N	E	K	EEAYNSLMKS	1	0.0223985	51.348	43.636	51.348	2.178	22481000	NaN	NaN	1	NaN	NaN	51.348
P42765	48	P42765	P42765	3-ketoacyl-CoA thiolase, mitochondrial	ACAA2	SEFAAKAALSAGKVSPETVDSVIMGNVLQSS	1786	P	3	2381		SEFAAKAALS	A	G	K	V	S	P	E	T	V	D	S	VIMGNVLQSS	1	5.38e-06	73.17	67.626	73.17	-0.7218	56851000	NaN	NaN	1	NaN	NaN	73.17
P42771	114	P42771	P42771	Cyclin-dependent kinase inhibitor 2A	CDKN2A	RAGARLDVRDAWGRLPVDLAEELGHRDVARY	1788	P	5	2383		RAGARLDVRD	A	W	G	R	L	P	V	D	L	A	E	ELGHRDVARY	1	0.00899571	48.656	37.455	45.047	-0.63253	56163000	1	1	NaN	46.362	48.656	NaN
P42771	3	P42771	P42771	Cyclin-dependent kinase inhibitor 2A	CDKN2A	_____________MEPAAGSSMEPSADWLAT	1789	P	2	2383		__________	_	_	_	M	E	P	A	A	G	S	S	MEPSADWLAT	1	3.67e-05	71.174	71.174	43.184	-0.14683	854050000	1	1	0.985309	43.184	43.184	71.174
P42771	11	P42771	P42771	Cyclin-dependent kinase inhibitor 2A	CDKN2A	_____MEPAAGSSMEPSADWLATAAARGRVE	1790	P	2	2383		_____MEPAA	G	S	S	M	E	P	S	A	D	W	L	ATAAARGRVE	1	0.000726465	55.841	55.841	43.184	-0.14683	34754000	1	1	0.948596	43.184	43.184	55.841
P42785	214	P42785	P42785	Lysosomal Pro-X carboxypeptidase	PRCP	ALAASAPIWQFEDLVPCGVFMKIVTTDFRKS	1792	P	3	2385		ALAASAPIWQ	F	E	D	L	V	P	C	G	V	F	M	KIVTTDFRKS	0.69395	0.00867853	41.133	41.133	41.133	1.099	16890000	NaN	0.69395	NaN	NaN	41.133	NaN
P42858	1362	P42858	P42858	Huntingtin	HTT	SSSVRPGLYHYCFMAPYTHFTQALADASLRN	1793	P	5	2386		SSSVRPGLYH	Y	C	F	M	A	P	Y	T	H	F	T	QALADASLRN	0.982052	5.47e-07	73.817	69.008	73.817	0.63459	141430000	NaN	0.982052	NaN	NaN	73.817	NaN
P42858	2603	P42858	P42858	Huntingtin	HTT	TGALISHEKLLLQINPERELGSMSYKLGQVS	1794	P	3	2386		TGALISHEKL	L	L	Q	I	N	P	E	R	E	L	G	SMSYKLGQVS	1	0.00557999	85.469	62.839	68.481	0.44423	278280000	1	1	NaN	85.469	68.481	NaN
P43246	179	P43246	P43246	DNA mismatch repair protein Msh2	MSH2	GYVDSIQRKLGLCEFPDNDQFSNLEALLIQI	1799	P	3	2396		GYVDSIQRKL	G	L	C	E	F	P	D	N	D	Q	F	SNLEALLIQI	1	0.0110958	67.992	61.488	67.992	0.035039	15636000	1	NaN	NaN	67.992	NaN	NaN
P43487	133	P43487	P43487	Ran-specific GTPase-activating protein	RANBP1	RAWVWNTHADFADECPKPELLAIRFLNAENA	1801	P	4	2403		RAWVWNTHAD	F	A	D	E	C	P	K	P	E	L	L	AIRFLNAENA	0.940892	0.0038575	51.526	48.529	51.526	-0.76329	463840000	0.940892	NaN	NaN	51.526	NaN	NaN
P43487	65	P43487	P43487	Ran-specific GTPase-activating protein	RANBP1	KMRAKLFRFASENDLPEWKERGTGDVKLLKH	1802	P	2	2403		KMRAKLFRFA	S	E	N	D	L	P	E	W	K	E	R	GTGDVKLLKH	1	0.0241839	85.813	71.907	85.813	3.2855	0	1	NaN	1	79.201	NaN	85.813
P43626	21	P43626	P43626	Killer cell immunoglobulin-like receptor 2DL1	KIR2DL1	VSMACVGFFLLQGAWPHEGVHRKPSLLAHPG	1804	P	4	2405		VSMACVGFFL	L	Q	G	A	W	P	H	E	G	V	H	RKPSLLAHPG	1	0.00105196	45.972	34.139	45.972	0.90339	137260000	1	NaN	NaN	45.972	NaN	NaN
P43897	224	P43897	P43897	Elongation factor Ts, mitochondrial	TSFM	SGFYVGSYVHGAMQSPSLHKLVLGKYGALVI	1805	P	3	2408		SGFYVGSYVH	G	A	M	Q	S	P	S	L	H	K	L	VLGKYGALVI	0.999999	0.00260334	60.398	52.595	60.398	0.43472	115620000	0.999957	NaN	0.999999	50.426	NaN	60.398
P45974	253	P45974	P45974	Ubiquitin carboxyl-terminal hydrolase 5	USP5	RETGYPLAVKLGTITPDGADVYSYDEDDMVL	1808	P	3	2413		RETGYPLAVK	L	G	T	I	T	P	D	G	A	D	V	YSYDEDDMVL	0.998313	2.03e-07	93.569	93.569	93.569	-0.30523	315370000	0.978143	0.998313	0.981063	51.848	93.569	51.632
P45985	32	P45985	P45985	Dual specificity mitogen-activated protein kinase kinase 4	MAP2K4	GSGTPGPVGSPAPGHPAVSSMQGKRKALKLN	1811	P	3	2416		GSGTPGPVGS	P	A	P	G	H	P	A	V	S	S	M	QGKRKALKLN	0.822933	3.55e-05	45.187	39.921	45.187	1.0532	172730000	0.822933	NaN	NaN	45.187	NaN	NaN
P46013	1964	P46013	P46013	Antigen KI-67	MKI67	KALEDLAGFKELFQTPGHTEESMTDDKITEV	1812	P	4	2417		KALEDLAGFK	E	L	F	Q	T	P	G	H	T	E	E	SMTDDKITEV	1	7.52e-05	58.891	54.778	43.04	0.35104	80764000	NaN	1	1	NaN	58.891	43.04
P46013	2569	P46013	P46013	Antigen KI-67	MKI67	RALEDLVDFKELFSAPGHTEESMTIDKNTKI	1813	P	4	2417		RALEDLVDFK	E	L	F	S	A	P	G	H	T	E	E	SMTIDKNTKI	1	4.71e-05	99.34	86.849	99.34	3.2496	126700000	1	1	NaN	99.34	96.019	NaN
P46013	1720	P46013	P46013	Antigen KI-67	MKI67	EVPEDLAGFIELFQTPSHTKESMTNEKTTKV	1815	P	4	2417		EVPEDLAGFI	E	L	F	Q	T	P	S	H	T	K	E	SMTNEKTTKV	1	1.16e-05	93.147	80.656	93.147	4.3896	194730000	1	1	0.999996	93.147	74.806	58.398
P46013	1006	P46013	P46013	Antigen KI-67	MKI67	HAKAPKSEKGKITKMPCQSLQPEPINTPTHT	1816	P	3	2417		HAKAPKSEKG	K	I	T	K	M	P	C	Q	S	L	Q	PEPINTPTHT	0.999957	0.00152999	70.335	69.006	70.335	0.85391	68611000	0.999957	NaN	NaN	70.335	NaN	NaN
P46013	1112	P46013	P46013	Antigen KI-67	MKI67	QSLEDLAGFKELFQTPGPSEESMTDEKTTKI	1817	P	3	2417		QSLEDLAGFK	E	L	F	Q	T	P	G	P	S	E	E	SMTDEKTTKI	0.532827	1.86e-05	63.516	58.899	63.516	-0.61777	80576000	0.532827	NaN	0	63.516	NaN	NaN
P46013	1114	P46013	P46013	Antigen KI-67	MKI67	LEDLAGFKELFQTPGPSEESMTDEKTTKIAC	1818	P	4	2417		LEDLAGFKEL	F	Q	T	P	G	P	S	E	E	S	M	TDEKTTKIAC	0.960924	2.07e-05	77.31	68.423	77.31	0.85242	49163000	NaN	NaN	0.960924	NaN	NaN	77.31
P46020	565	P46020	P46020	Phosphorylase b kinase regulatory subunit alpha, skeletal muscle isoform	PHKA1	LCSRWRMTGQPTITFPISHSMLDEDGTSLNS	1819	P	3	2419		LCSRWRMTGQ	P	T	I	T	F	P	I	S	H	S	M	LDEDGTSLNS	0.981905	0.000306504	50.58	48.215	50.58	-2.1742	21348000	0.981905	NaN	NaN	50.58	NaN	NaN
P46060	422	P46060	P46060	Ran GTPase-activating protein 1	RANGAP1	SATPSRKILDPNTGEPAPVLSSPPPADVSTF	1821	P	3	2420		SATPSRKILD	P	N	T	G	E	P	A	P	V	L	S	SPPPADVSTF	0.937674	0.00267872	42.571	34.175	42.571	-1.5208	73592000	NaN	NaN	0.937674	NaN	NaN	42.571
P46060	424	P46060	P46060	Ran GTPase-activating protein 1	RANGAP1	TPSRKILDPNTGEPAPVLSSPPPADVSTFLA	1822	P	3	2420		TPSRKILDPN	T	G	E	P	A	P	V	L	S	S	P	PPADVSTFLA	0.938774	0.00267872	42.571	34.175	42.571	-1.5208	73592000	NaN	NaN	0.938774	NaN	NaN	42.571
P46060	429	P46060	P46060	Ran GTPase-activating protein 1	RANGAP1	ILDPNTGEPAPVLSSPPPADVSTFLAFPSPE	1823	P	3	2420		ILDPNTGEPA	P	V	L	S	S	P	P	P	A	D	V	STFLAFPSPE	0.940134	0.00267872	42.571	34.175	42.571	-1.5208	73592000	NaN	NaN	0.940134	NaN	NaN	42.571
P46060	430	P46060	P46060	Ran GTPase-activating protein 1	RANGAP1	LDPNTGEPAPVLSSPPPADVSTFLAFPSPEK	1824	P	3	2420		LDPNTGEPAP	V	L	S	S	P	P	P	A	D	V	S	TFLAFPSPEK	0.940134	0.00267872	42.571	34.175	42.571	-1.5208	73592000	NaN	NaN	0.940134	NaN	NaN	42.571
P46060	431	P46060	P46060	Ran GTPase-activating protein 1	RANGAP1	DPNTGEPAPVLSSPPPADVSTFLAFPSPEKL	1825	P	3	2420		DPNTGEPAPV	L	S	S	P	P	P	A	D	V	S	T	FLAFPSPEKL	0.917439	0.00267872	42.571	34.175	42.571	-1.5208	73592000	NaN	NaN	0.917439	NaN	NaN	42.571
P46087	571	P46087	P46087	Probable 28S rRNA (cytosine(4447)-C(5))-methyltransferase	NOP2	ERRFHPSLRSTRRFYPHTHNMDGFFIAKFKK	1826	P	2	2422		ERRFHPSLRS	T	R	R	F	Y	P	H	T	H	N	M	DGFFIAKFKK	1	0.0107639	68.069	46.438	68.069	-0.67605	0	NaN	1	NaN	NaN	68.069	NaN
P46087	222	P46087	P46087	Probable 28S rRNA (cytosine(4447)-C(5))-methyltransferase	NOP2	DGGLQINVDEEPFVLPPAGEMEQDAQAPDLQ	1827	P	3	2422		DGGLQINVDE	E	P	F	V	L	P	P	A	G	E	M	EQDAQAPDLQ	0.514475	0.000849338	44.75	38.338	44.75	0.75271	16919000	NaN	0.514475	NaN	NaN	44.75	NaN
P46109	45	P46109	P46109	Crk-like protein	CRKL	GQRHGMFLVRDSSTCPGDYVLSVSENSRVSH	1829	P	3	2425		GQRHGMFLVR	D	S	S	T	C	P	G	D	Y	V	L	SVSENSRVSH	1	0.0293227	49.537	45.435	49.537	-0.10113	29800000	1	NaN	NaN	49.537	NaN	NaN
P46109	116	P46109	P46109	Crk-like protein	CRKL	PAPRYPSPPMGSVSAPNLPTAEDNLEYVRTL	1833	P	3	2425		PAPRYPSPPM	G	S	V	S	A	P	N	L	P	T	A	EDNLEYVRTL	0.752047	0.00255636	57.61	51.177	57.61	-2.2351	5302500	0.752047	0.250125	0	57.61	40.142	NaN
P46379	1059	P46379	P46379	Large proline-rich protein BAG6	BAG6	SGMPAKRRKTMQGEGPQLLLSEAVSRAAKAA	1834	P	3	2427		SGMPAKRRKT	M	Q	G	E	G	P	Q	L	L	L	S	EAVSRAAKAA	1	0.0051081	56.936	51.606	56.936	-0.67895	67411000	NaN	1	1	NaN	47.752	56.936
P46459	535	P46459	P46459	Vesicle-fusing ATPase	NSF	DGELLVQQTKNSDRTPLVSVLLEGPPHSGKT	1836	P	3	2428		DGELLVQQTK	N	S	D	R	T	P	L	V	S	V	L	LEGPPHSGKT	1	0.0216388	42.123	12.395	42.123	4.209	10993000	NaN	1	NaN	NaN	42.123	NaN
P46459	544	P46459	P46459	Vesicle-fusing ATPase	NSF	KNSDRTPLVSVLLEGPPHSGKTALAAKIAEE	1837	P	3	2428		KNSDRTPLVS	V	L	L	E	G	P	P	H	S	G	K	TALAAKIAEE	1	0.0216388	42.123	12.395	42.123	4.209	10993000	NaN	1	NaN	NaN	42.123	NaN
P46459	545	P46459	P46459	Vesicle-fusing ATPase	NSF	NSDRTPLVSVLLEGPPHSGKTALAAKIAEES	1838	P	3	2428		NSDRTPLVSV	L	L	E	G	P	P	H	S	G	K	T	ALAAKIAEES	1	0.0216388	42.123	12.395	42.123	4.209	10993000	NaN	1	NaN	NaN	42.123	NaN
P46776	71	P46776	P46776	60S ribosomal protein L27a	RPL27A	VGMKHYHLKRNQSFCPTVNLDKLWTLVSEQT	1841	P	3	2434		VGMKHYHLKR	N	Q	S	F	C	P	T	V	N	L	D	KLWTLVSEQT	1	1.06e-05	125.75	116.42	78.486	-0.26246	1662700000	1	1	NaN	125.75	50.539	NaN
P46782	9	P46782	P46782	40S ribosomal protein S5;40S ribosomal protein S5, N-terminally processed	RPS5	_______MTEWETAAPAVAETPDIKLFGKWS	1843	P	2	2439		_______MTE	W	E	T	A	A	P	A	V	A	E	T	PDIKLFGKWS	1	0.0038316	44.511	41.65	44.511	0.08669	78464000	1	0.998771	NaN	44.511	43.184	NaN
P46782	15	P46782	P46782	40S ribosomal protein S5;40S ribosomal protein S5, N-terminally processed	RPS5	_MTEWETAAPAVAETPDIKLFGKWSTDDVQI	1844	P	2	2439		_MTEWETAAP	A	V	A	E	T	P	D	I	K	L	F	GKWSTDDVQI	1	0.0038316	44.511	41.65	44.511	0.08669	56794000	1	NaN	NaN	44.511	NaN	NaN
P46783;Q9NQ39	30;30	P46783	P46783	40S ribosomal protein S10;Putative 40S ribosomal protein S10-like	RPS10;RPS10P5	LFKEGVMVAKKDVHMPKHPELADKNVPNLHV	1845	P	5	2440		LFKEGVMVAK	K	D	V	H	M	P	K	H	P	E	L	ADKNVPNLHV	0.875896	0.0024564	63.454	63.454	63.454	0.64367	145730000	NaN	NaN	0.875896	NaN	NaN	63.454
P46783;Q9NQ39	33;33	P46783	P46783	40S ribosomal protein S10;Putative 40S ribosomal protein S10-like	RPS10;RPS10P5	EGVMVAKKDVHMPKHPELADKNVPNLHVMKA	1846	P	6	2440		EGVMVAKKDV	H	M	P	K	H	P	E	L	A	D	K	NVPNLHVMKA	0.531467	0.0188383	42.309	42.309	42.309	-0.25356	199250000	NaN	NaN	0.531467	NaN	NaN	42.309
P46821	819	P46821	P46821	Microtubule-associated protein 1B;MAP1B heavy chain;MAP1 light chain LC1	MAP1B	TTAAVMAAAGIAAIGPAKELEAERSLMSSPE	1847	P	3	2441		TTAAVMAAAG	I	A	A	I	G	P	A	K	E	L	E	AERSLMSSPE	1	0.000113388	63.008	57.063	63.008	-2.0845	0	NaN	1	NaN	NaN	63.008	NaN
P46821	1209	P46821	P46821	Microtubule-associated protein 1B;MAP1B heavy chain;MAP1 light chain LC1	MAP1B	ATDGKDYNASASTISPPSSMEEDKFSRSALR	1849	P	2	2441		ATDGKDYNAS	A	S	T	I	S	P	P	S	S	M	E	EDKFSRSALR	0.609825	7.99e-05	79.466	78.728	79.466	-0.52316	43372000	0	NaN	0.609825	NaN	NaN	79.466
P46821	318	P46821	P46821	Microtubule-associated protein 1B;MAP1B heavy chain;MAP1 light chain LC1	MAP1B	RVDSILLTHIGDDNLPGINSMLQRKIAELEE	1851	P	3	2441		RVDSILLTHI	G	D	D	N	L	P	G	I	N	S	M	LQRKIAELEE	1	0.00164572	73.341	67.561	73.341	1.3437	70613000	NaN	1	1	NaN	71.528	73.341
P46821	2215	P46821	P46821	Microtubule-associated protein 1B;MAP1B heavy chain;MAP1 light chain LC1	MAP1B	PPPAPVQDRSPSPRHPDVSMVDPEALAIEQN	1852	P	3	2441		PPPAPVQDRS	P	S	P	R	H	P	D	V	S	M	V	DPEALAIEQN	0.991482	0.00587118	58.848	51.227	50.87	-0.2132	92121000	NaN	0.991482	0.976239	NaN	50.87	58.848
P46821	2115	P46821	P46821	Microtubule-associated protein 1B;MAP1B heavy chain;MAP1 light chain LC1	MAP1B	SFINPNPLEWFASEEPTEESEKPLTQSGGAP	1853	P	3	2441		SFINPNPLEW	F	A	S	E	E	P	T	E	E	S	E	KPLTQSGGAP	0.575657	4.42e-16	93.972	85.469	93.972	-3.9325	0	NaN	0.575657	NaN	NaN	93.972	NaN
P46940	414	P46940	P46940	Ras GTPase-activating-like protein IQGAP1	IQGAP1	IQKGVAEKTVLELMNPEAQLPQVYPFAADLY	1856	P	3	2446		IQKGVAEKTV	L	E	L	M	N	P	E	A	Q	L	P	QVYPFAADLY	0.96387	3.31e-07	74.846	67.166	74.846	1.4331	31834000	NaN	NaN	0.96387	NaN	NaN	74.846
P46940	146	P46940	P46940	Ras GTPase-activating-like protein IQGAP1	IQGAP1	IFYPETTDIYDRKNMPRCIYCIHALSLYLFK	1857	P	4	2446		IFYPETTDIY	D	R	K	N	M	P	R	C	I	Y	C	IHALSLYLFK	1	0.00015126	125.28	116.1	125.28	-0.69072	1903500000	1	0.999999	1	74.816	84.874	125.28
P46940	15	P46940	P46940	Ras GTPase-activating-like protein IQGAP1	IQGAP1	_MSAADEVDGLGVARPHYGSVLDNERLTAEE	1859	P	4	2446		_MSAADEVDG	L	G	V	A	R	P	H	Y	G	S	V	LDNERLTAEE	1	0.00079378	42.181	36.596	42.181	-0.80494	42664000	NaN	NaN	1	NaN	NaN	42.181
P46940	658	P46940	P46940	Ras GTPase-activating-like protein IQGAP1	IQGAP1	LSALRSPDVGLYGVIPECGETYHSDLAEAKK	1860	P	3	2446		LSALRSPDVG	L	Y	G	V	I	P	E	C	G	E	T	YHSDLAEAKK	0.99983	0.0272888	40.285	37.557	40.285	-0.58078	17544000	0.99983	NaN	NaN	40.285	NaN	NaN
P46940	1198	P46940	P46940	Ras GTPase-activating-like protein IQGAP1	IQGAP1	LLKIIGNLLYYRYMNPAIVAPDAFDIIDLSA	1861	P	4	2446		LLKIIGNLLY	Y	R	Y	M	N	P	A	I	V	A	P	DAFDIIDLSA	1	2.39e-05	112.91	102.67	99.711	0.94947	49966000	NaN	1	0.99999	NaN	99.711	112.91
P46977	632	P46977	P46977	Dolichyl-diphosphooligosaccharide--protein glycosyltransferase subunit STT3A	STT3A	YYTPTGEFRVDREGSPVLLNCLMYKMCYYRF	1862	P	4	2449		YYTPTGEFRV	D	R	E	G	S	P	V	L	L	N	C	LMYKMCYYRF	0.945053	0.00187828	55.063	49.633	55.063	0.94949	35931000	NaN	NaN	0.945053	NaN	NaN	55.063
P47224	3	P47224	P47224	Guanine nucleotide exchange factor MSS4	RABIF	_____________MEPAEQPSELVSAEGRNR	1863	P	3	2450		__________	_	_	_	M	E	P	A	E	Q	P	S	ELVSAEGRNR	0.964758	0.0010083	59.513	53.798	59.513	1.0138	55993000	NaN	NaN	0.964758	NaN	NaN	59.513
P47756	208	P47756	P47756	F-actin-capping protein subunit beta	CAPZB	LTRQMEKDETVSDCSPHIANIGRLVEDMENK	1864	P	3	2453		LTRQMEKDET	V	S	D	C	S	P	H	I	A	N	I	GRLVEDMENK	1	0.0106132	125.75	109.88	46.408	0.13539	1955500000	1	1	1	125.75	53.995	46.408
P47756	74	P47756	P47756	F-actin-capping protein subunit beta	CAPZB	YLLCDYNRDGDSYRSPWSNKYDPPLEDGAMP	1865	P	3	2453		YLLCDYNRDG	D	S	Y	R	S	P	W	S	N	K	Y	DPPLEDGAMP	0.762556	0.0342409	41.115	32.827	41.115	0.59711	30401000	NaN	NaN	0.762556	NaN	NaN	41.115
P47756	81	P47756	P47756	F-actin-capping protein subunit beta	CAPZB	RDGDSYRSPWSNKYDPPLEDGAMPSARLRKL	1866	P	3	2453		RDGDSYRSPW	S	N	K	Y	D	P	P	L	E	D	G	AMPSARLRKL	0.981193	0.0342409	43.497	34.678	43.497	0.6779	105750000	0.981193	NaN	0.931217	43.497	NaN	41.115
P47928	6	P47928	P47928	DNA-binding protein inhibitor ID-4	ID4	__________MKAVSPVRPSGRKAPSGCGGG	1870	P	2	2458		__________	M	K	A	V	S	P	V	R	P	S	G	RKAPSGCGGG	1	0.0297743	83.614	29.558	83.614	-1.7326	60120000	NaN	NaN	1	NaN	NaN	83.614
P48163	185	P48163	P48163	NADP-dependent malic enzyme	ME1	PVGKLALYTACGGMNPQECLPVILDVGTENE	1872	P	3	2465		PVGKLALYTA	C	G	G	M	N	P	Q	E	C	L	P	VILDVGTENE	0.986397	5.41e-07	94.968	91.365	94.968	1.8902	9737900	NaN	0.986397	NaN	NaN	94.968	NaN
P48444	267	P48444	P48444	Coatomer subunit delta	ARCN1	SSMGKRTSEATKMHAPPINMESVHMKIEEKI	1874	P	2	2472		SSMGKRTSEA	T	K	M	H	A	P	P	I	N	M	E	SVHMKIEEKI	0.638947	0.00373773	72.2	72.2	72.2	0.071534	18497000	0.548023	0.638947	NaN	45.704	72.2	NaN
P48552	691	P48552	P48552	Nuclear receptor-interacting protein 1	NRIP1	NKTNAVEENKAFSSQPTGPEPGLSGSEIENL	1877	P	5	2478		NKTNAVEENK	A	F	S	S	Q	P	T	G	P	E	P	GLSGSEIENL	0.931067	0.017017	44.632	26.072	41.482	-0.84246	1334900000	0.666667	0.931067	0	44.632	41.482	NaN
P48552	694	P48552	P48552	Nuclear receptor-interacting protein 1	NRIP1	NAVEENKAFSSQPTGPEPGLSGSEIENLLER	1878	P	5	2478		NAVEENKAFS	S	Q	P	T	G	P	E	P	G	L	S	GSEIENLLER	0.885759	0.017017	44.632	26.072	41.482	-0.60651	3515900000	0.666667	0.534466	0.885759	44.632	41.482	41.482
P48552	696	P48552	P48552	Nuclear receptor-interacting protein 1	NRIP1	VEENKAFSSQPTGPEPGLSGSEIENLLERRT	1879	P	5	2478		VEENKAFSSQ	P	T	G	P	E	P	G	L	S	G	S	EIENLLERRT	0.885759	0.017017	44.632	26.072	41.482	-0.60651	3515900000	0.666667	0.534466	0.885759	44.632	41.482	41.482
P48634	1363	P48634	P48634	Protein PRRC2A	PRRC2A	PKAVGTPGGGGGGAVPGISAMSRGDLSQRAK	1882	P	2	2481		PKAVGTPGGG	G	G	G	A	V	P	G	I	S	A	M	SRGDLSQRAK	1	3.65e-14	136.6	108.32	136.6	-1.3218	63396000	1	NaN	1	128.76	NaN	136.6
P48634	197	P48634	P48634	Protein PRRC2A	PRRC2A	AAKERESAEQSSGPGPSLRPQNSTTWRDGGG	1883	P	3	2481		AAKERESAEQ	S	S	G	P	G	P	S	L	R	P	Q	NSTTWRDGGG	0.977262	1.72e-06	99.86	95.698	70.453	0.83264	129670000	0.976518	0.977262	NaN	99.86	79.467	NaN
P48634	201	P48634	P48634	Protein PRRC2A	PRRC2A	RESAEQSSGPGPSLRPQNSTTWRDGGGRGPD	1884	P	3	2481		RESAEQSSGP	G	P	S	L	R	P	Q	N	S	T	T	WRDGGGRGPD	0.977262	1.72e-06	99.86	95.698	70.453	0.83264	129670000	0.976518	0.977262	NaN	99.86	79.467	NaN
P48634	861	P48634	P48634	Protein PRRC2A	PRRC2A	APGPPISRFPLEEPGPRPLPWPPGSDEVAKI	1886	P	3	2481		APGPPISRFP	L	E	E	P	G	P	R	P	L	P	W	PPGSDEVAKI	0.586485	4.69e-05	84.946	73.142	84.946	-0.61007	53545000	0.586485	0.526938	NaN	84.946	51.645	NaN
P48634	863	P48634	P48634	Protein PRRC2A	PRRC2A	GPPISRFPLEEPGPRPLPWPPGSDEVAKIQT	1887	P	3	2481		GPPISRFPLE	E	P	G	P	R	P	L	P	W	P	P	GSDEVAKIQT	0.586485	4.69e-05	84.946	73.142	84.946	-0.61007	27808000	0.586485	NaN	NaN	84.946	NaN	NaN
P48634	865	P48634	P48634	Protein PRRC2A	PRRC2A	PISRFPLEEPGPRPLPWPPGSDEVAKIQTPP	1888	P	3	2481		PISRFPLEEP	G	P	R	P	L	P	W	P	P	G	S	DEVAKIQTPP	0.816009	4.69e-05	84.946	73.142	67.864	-0.47062	89240000	0.816009	0.808681	NaN	84.946	51.645	NaN
P48643	470	P48643	P48643	T-complex protein 1 subunit epsilon	CCT5	LEVIPMALSENSGMNPIQTMTEVRARQVKEM	1893	P	2	2483		LEVIPMALSE	N	S	G	M	N	P	I	Q	T	M	T	EVRARQVKEM	1	5.27e-05	106.28	106.28	93.765	-0.47923	353690000	1	0.699582	0.962631	93.765	106.28	92.551
P48643	54	P48643	P48643	T-complex protein 1 subunit epsilon	CCT5	MAAKAVANTMRTSLGPNGLDKMMVDKDGDVT	1895	P	4	2483		MAAKAVANTM	R	T	S	L	G	P	N	G	L	D	K	MMVDKDGDVT	1	1.19e-39	164.1	157.12	136.39	0.38064	1381100000	1	1	1	164.1	136.39	123.4
P48643	441	P48643	P48643	T-complex protein 1 subunit epsilon	CCT5	EISCALAVSQEADKCPTLEQYAMRAFADALE	1896	P	3	2483		EISCALAVSQ	E	A	D	K	C	P	T	L	E	Q	Y	AMRAFADALE	1	0.000358032	60.176	44.896	60.176	-1.4797	43147000	NaN	1	NaN	NaN	60.176	NaN
P48730	359	P48730	P48730	Casein kinase I isoform delta	CSNK1D	TPLTPTSHTANTSPRPVSGMERERKVSMRLH	1899	P	4	2489		TPLTPTSHTA	N	T	S	P	R	P	V	S	G	M	E	RERKVSMRLH	0.664737	2.7e-05	67.367	58.475	67.367	-0.29155	82764000	0.664737	0	0.490993	67.367	NaN	48.697
P48739	12	P48739	P48739	Phosphatidylinositol transfer protein beta isoform	PITPNB	____MVLIKEFRVVLPCSVQEYQVGQLYSVA	1900	P	3	2491		____MVLIKE	F	R	V	V	L	P	C	S	V	Q	E	YQVGQLYSVA	1	0.00860358	54.141	51.828	50.055	0.056042	19924000	1	NaN	NaN	54.141	NaN	NaN
P48739	185	P48739	P48739	Phosphatidylinositol transfer protein beta isoform	PITPNB	RGPLGPNWKKELANSPDCPQMCAYKLVTIKF	1901	P	2	2491		RGPLGPNWKK	E	L	A	N	S	P	D	C	P	Q	M	CAYKLVTIKF	0.922622	0.000712241	104.52	95.334	73.067	-1.1074	175150000	0.922622	NaN	NaN	104.52	NaN	NaN
P49005	429	P49005	P49005	DNA polymerase delta subunit 2	POLD2	IIRGPEDQTVLLVTVPDFSATQTACLVNLRS	1903	P	3	2493		IIRGPEDQTV	L	L	V	T	V	P	D	F	S	A	T	QTACLVNLRS	0.999935	0.00466628	53.262	37.324	53.262	0.36393	3824900	0.999935	NaN	NaN	53.262	NaN	NaN
P49006	171	P49006	P49006	MARCKS-related protein	MARCKSL1	AKGAEASAASEEEAGPQATEPSTPSGPESGP	1904	P	3	2494		AKGAEASAAS	E	E	E	A	G	P	Q	A	T	E	P	STPSGPESGP	0.94832	2e-09	63.426	63.419	63.426	0.38409	55113000	NaN	NaN	0.94832	NaN	NaN	63.426
P49006	176	P49006	P49006	MARCKS-related protein	MARCKSL1	ASAASEEEAGPQATEPSTPSGPESGPTPASA	1905	P	3	2494		ASAASEEEAG	P	Q	A	T	E	P	S	T	P	S	G	PESGPTPASA	0.94832	2e-09	63.426	63.419	63.426	0.38409	55113000	NaN	NaN	0.94832	NaN	NaN	63.426
P49006	179	P49006	P49006	MARCKS-related protein	MARCKSL1	ASEEEAGPQATEPSTPSGPESGPTPASAEQN	1906	P	3	2494		ASEEEAGPQA	T	E	P	S	T	P	S	G	P	E	S	GPTPASAEQN	0.94832	2e-09	63.426	63.419	63.426	0.38409	55113000	NaN	NaN	0.94832	NaN	NaN	63.426
P49006	182	P49006	P49006	MARCKS-related protein	MARCKSL1	EEAGPQATEPSTPSGPESGPTPASAEQNE__	1907	P	3	2494		EEAGPQATEP	S	T	P	S	G	P	E	S	G	P	T	PASAEQNE__	0.94832	2e-09	63.426	63.419	63.426	0.38409	55113000	NaN	NaN	0.94832	NaN	NaN	63.426
P49006	186	P49006	P49006	MARCKS-related protein	MARCKSL1	PQATEPSTPSGPESGPTPASAEQNE______	1908	P	3	2494		PQATEPSTPS	G	P	E	S	G	P	T	P	A	S	A	EQNE______	0.94832	2e-09	63.426	63.419	63.426	0.38409	55113000	NaN	NaN	0.94832	NaN	NaN	63.426
P49006	69	P49006	P49006	MARCKS-related protein	MARCKSL1	TDEAAGATGDAIEPAPPSQGAEAKGEVPPKE	1909	P	4	2494		TDEAAGATGD	A	I	E	P	A	P	P	S	Q	G	A	EAKGEVPPKE	0.981622	1.99e-16	73.982	72.776	73.982	-0.77499	148720000	NaN	0.95189	0.981622	NaN	50.665	73.982
P49006	70	P49006	P49006	MARCKS-related protein	MARCKSL1	DEAAGATGDAIEPAPPSQGAEAKGEVPPKET	1910	P	4	2494		DEAAGATGDA	I	E	P	A	P	P	S	Q	G	A	E	AKGEVPPKET	0.981622	1.99e-16	73.982	72.776	73.982	-0.77499	148720000	NaN	0.95189	0.981622	NaN	50.665	73.982
P49006	81	P49006	P49006	MARCKS-related protein	MARCKSL1	EPAPPSQGAEAKGEVPPKETPKKKKKFSFKK	1911	P	4	2494		EPAPPSQGAE	A	K	G	E	V	P	P	K	E	T	P	KKKKKFSFKK	0.98162	1.99e-16	73.982	72.776	73.982	-0.77499	148720000	NaN	0.951796	0.98162	NaN	50.665	73.982
P49006	82	P49006	P49006	MARCKS-related protein	MARCKSL1	PAPPSQGAEAKGEVPPKETPKKKKKFSFKKP	1912	P	4	2494		PAPPSQGAEA	K	G	E	V	P	P	K	E	T	P	K	KKKKFSFKKP	0.98162	1.99e-16	73.982	72.776	73.982	-0.77499	148720000	NaN	0.951796	0.98162	NaN	50.665	73.982
P49006	86	P49006	P49006	MARCKS-related protein	MARCKSL1	SQGAEAKGEVPPKETPKKKKKFSFKKPFKLS	1913	P	4	2494		SQGAEAKGEV	P	P	K	E	T	P	K	K	K	K	K	FSFKKPFKLS	0.983026	1.99e-16	73.982	72.776	73.982	-0.77499	148720000	NaN	0.910253	0.983026	NaN	50.665	73.982
P49023	330	P49023	P49023	Paxillin	PXN	QGKTGSSSPPGGPPKPGSQLDSMLGSLQSDL	1916	P	3	2495		QGKTGSSSPP	G	G	P	P	K	P	G	S	Q	L	D	SMLGSLQSDL	0.734876	0.00223551	103.12	96.888	103.12	1.1002	42964000	0.734876	NaN	NaN	103.12	NaN	NaN
P49069	53	P49069	P49069	Calcium signal-modulating cyclophilin ligand	CAMLG	MNSEQRINRIMGFHRPGSGAEEESQTKSKQQ	1917	P	4	2496		MNSEQRINRI	M	G	F	H	R	P	G	S	G	A	E	EESQTKSKQQ	1	0.0097751	54.288	49.386	46.663	-0.63722	22878000	1	NaN	1	54.288	NaN	46.663
P49257	423	P49257	P49257	Protein ERGIC-53	LMAN1	NSMSETVRLVSGMQHPGSAGGVYETTQHFID	1921	P	6	2502		NSMSETVRLV	S	G	M	Q	H	P	G	S	A	G	G	VYETTQHFID	1	1.02e-05	81.242	79.392	81.242	-1.2156	501220000	1	NaN	NaN	81.242	NaN	NaN
P49257	65	P49257	P49257	Protein ERGIC-53	LMAN1	YSFKGPHLVQSDGTVPFWAHAGNAIPSSDQI	1922	P	5	2502		YSFKGPHLVQ	S	D	G	T	V	P	F	W	A	H	A	GNAIPSSDQI	0.999721	2.45e-05	60.876	51.586	48.693	0.85817	74985000	0.999721	0.98105	NaN	48.693	60.876	NaN
P49257	75	P49257	P49257	Protein ERGIC-53	LMAN1	SDGTVPFWAHAGNAIPSSDQIRVAPSLKSQR	1923	P	5	2502		SDGTVPFWAH	A	G	N	A	I	P	S	S	D	Q	I	RVAPSLKSQR	0.999278	0.000962736	48.693	37.79	48.693	0.85817	52518000	0.999278	NaN	NaN	48.693	NaN	NaN
P49321	699	P49321	P49321	Nuclear autoantigenic sperm protein	NASP	PGGGGSSVSMIASRKPTDGASSSNCVTDISH	1925	P	4	2504		PGGGGSSVSM	I	A	S	R	K	P	T	D	G	A	S	SSNCVTDISH	1	0.0173817	46.494	38.104	44.382	0.32863	174900000	1	1	1	44.382	44.382	46.494
P49327	2203	P49327	P49327	Fatty acid synthase;[Acyl-carrier-protein] S-acetyltransferase;[Acyl-carrier-protein] S-malonyltransferase;3-oxoacyl-[acyl-carrier-protein] synthase;3-oxoacyl-[acyl-carrier-protein] reductase;3-hydroxyacyl-[acyl-carrier-protein] dehydratase;Enoyl-[acyl-carrier-protein] reductase;Oleoyl-[acyl-carrier-protein] hydrolase	FASN	QELSSKADEASELACPTPKEDGLAQQQTQLN	1926	P	3	2505		QELSSKADEA	S	E	L	A	C	P	T	P	K	E	D	GLAQQQTQLN	0.976711	3.13e-05	160.33	153.06	120.64	1.3487	3751500000	0.866595	0.976711	0.931562	143.4	120.64	160.33
P49327	616	P49327	P49327	Fatty acid synthase;[Acyl-carrier-protein] S-acetyltransferase;[Acyl-carrier-protein] S-malonyltransferase;3-oxoacyl-[acyl-carrier-protein] synthase;3-oxoacyl-[acyl-carrier-protein] reductase;3-hydroxyacyl-[acyl-carrier-protein] dehydratase;Enoyl-[acyl-carrier-protein] reductase;Oleoyl-[acyl-carrier-protein] hydrolase	FASN	LAAYWRGQCIKEAHLPPGAMAAVGLSWEECK	1928	P	4	2505		LAAYWRGQCI	K	E	A	H	L	P	P	G	A	M	A	AVGLSWEECK	0.52209	0.0193263	45.395	37.774	45.395	3.8468	23031000	0.52209	NaN	NaN	45.395	NaN	NaN
P49327	1121	P49327	P49327	Fatty acid synthase;[Acyl-carrier-protein] S-acetyltransferase;[Acyl-carrier-protein] S-malonyltransferase;3-oxoacyl-[acyl-carrier-protein] synthase;3-oxoacyl-[acyl-carrier-protein] reductase;3-hydroxyacyl-[acyl-carrier-protein] dehydratase;Enoyl-[acyl-carrier-protein] reductase;Oleoyl-[acyl-carrier-protein] hydrolase	FASN	QQEQQVPILEKFCFTPHTEEGCLSERAALQE	1930	P	3	2505		QQEQQVPILE	K	F	C	F	T	P	H	T	E	E	G	CLSERAALQE	1	0.0249751	55.173	54.484	55.173	-0.72114	1779800000	1	1	NaN	53.828	55.173	NaN
P49327	486	P49327	P49327	Fatty acid synthase;[Acyl-carrier-protein] S-acetyltransferase;[Acyl-carrier-protein] S-malonyltransferase;3-oxoacyl-[acyl-carrier-protein] synthase;3-oxoacyl-[acyl-carrier-protein] reductase;3-hydroxyacyl-[acyl-carrier-protein] dehydratase;Enoyl-[acyl-carrier-protein] reductase;Oleoyl-[acyl-carrier-protein] hydrolase	FASN	AVLGGERGGPEVQQVPAGERPLWFICSGMGT	1932	P	3	2505		AVLGGERGGP	E	V	Q	Q	V	P	A	G	E	R	P	LWFICSGMGT	1	0.000106362	87.509	75.985	87.509	-3.2519	97704000	NaN	1	NaN	NaN	87.509	NaN
P49327	491	P49327	P49327	Fatty acid synthase;[Acyl-carrier-protein] S-acetyltransferase;[Acyl-carrier-protein] S-malonyltransferase;3-oxoacyl-[acyl-carrier-protein] synthase;3-oxoacyl-[acyl-carrier-protein] reductase;3-hydroxyacyl-[acyl-carrier-protein] dehydratase;Enoyl-[acyl-carrier-protein] reductase;Oleoyl-[acyl-carrier-protein] hydrolase	FASN	ERGGPEVQQVPAGERPLWFICSGMGTQWRGM	1933	P	3	2505		ERGGPEVQQV	P	A	G	E	R	P	L	W	F	I	C	SGMGTQWRGM	1	0.000106362	87.509	75.985	87.509	-3.2519	136340000	NaN	1	0.945097	NaN	87.509	64.68
P49327	1440	P49327	P49327	Fatty acid synthase;[Acyl-carrier-protein] S-acetyltransferase;[Acyl-carrier-protein] S-malonyltransferase;3-oxoacyl-[acyl-carrier-protein] synthase;3-oxoacyl-[acyl-carrier-protein] reductase;3-hydroxyacyl-[acyl-carrier-protein] dehydratase;Enoyl-[acyl-carrier-protein] reductase;Oleoyl-[acyl-carrier-protein] hydrolase	FASN	VESLKGILADEDSSRPVWLKAINCATSGVVG	1934	P	3	2505		VESLKGILAD	E	D	S	S	R	P	V	W	L	K	A	INCATSGVVG	1	0.00116765	107.14	76.178	62.357	1.2564	193570000	1	NaN	1	94.728	NaN	107.14
P49327	1556	P49327	P49327	Fatty acid synthase;[Acyl-carrier-protein] S-acetyltransferase;[Acyl-carrier-protein] S-malonyltransferase;3-oxoacyl-[acyl-carrier-protein] synthase;3-oxoacyl-[acyl-carrier-protein] reductase;3-hydroxyacyl-[acyl-carrier-protein] dehydratase;Enoyl-[acyl-carrier-protein] reductase;Oleoyl-[acyl-carrier-protein] hydrolase	FASN	LSSIRWVCSSLRHAQPTCPGAQLCTVYYASL	1935	P	4	2505		LSSIRWVCSS	L	R	H	A	Q	P	T	C	P	G	A	QLCTVYYASL	0.540329	0.000350781	53.968	51.878	53.968	-0.31053	9717800	0.540329	NaN	NaN	53.968	NaN	NaN
P49327	461	P49327	P49327	Fatty acid synthase;[Acyl-carrier-protein] S-acetyltransferase;[Acyl-carrier-protein] S-malonyltransferase;3-oxoacyl-[acyl-carrier-protein] synthase;3-oxoacyl-[acyl-carrier-protein] reductase;3-hydroxyacyl-[acyl-carrier-protein] dehydratase;Enoyl-[acyl-carrier-protein] reductase;Oleoyl-[acyl-carrier-protein] hydrolase	FASN	QDLAFLSMLNDIAAVPATAMPFRGYAVLGGE	1936	P	2	2505		QDLAFLSMLN	D	I	A	A	V	P	A	T	A	M	P	FRGYAVLGGE	0.987524	1.14e-25	162.81	153.44	162.81	-0.52014	10763000000	0.987524	0.9324	0.832441	162.81	155.15	95.111
P49327	466	P49327	P49327	Fatty acid synthase;[Acyl-carrier-protein] S-acetyltransferase;[Acyl-carrier-protein] S-malonyltransferase;3-oxoacyl-[acyl-carrier-protein] synthase;3-oxoacyl-[acyl-carrier-protein] reductase;3-hydroxyacyl-[acyl-carrier-protein] dehydratase;Enoyl-[acyl-carrier-protein] reductase;Oleoyl-[acyl-carrier-protein] hydrolase	FASN	LSMLNDIAAVPATAMPFRGYAVLGGERGGPE	1937	P	3	2505		LSMLNDIAAV	P	A	T	A	M	P	F	R	G	Y	A	VLGGERGGPE	0.98351	1.15e-52	187.69	177.06	180.61	-0.93677	952400000	0.519311	0.98351	0.969973	41.423	187.69	132.99
P49327	1585	P49327	P49327	Fatty acid synthase;[Acyl-carrier-protein] S-acetyltransferase;[Acyl-carrier-protein] S-malonyltransferase;3-oxoacyl-[acyl-carrier-protein] synthase;3-oxoacyl-[acyl-carrier-protein] reductase;3-hydroxyacyl-[acyl-carrier-protein] dehydratase;Enoyl-[acyl-carrier-protein] reductase;Oleoyl-[acyl-carrier-protein] hydrolase	FASN	SLNFRDIMLATGKLSPDAIPGKWTSQDSLLG	1938	P	3	2505		SLNFRDIMLA	T	G	K	L	S	P	D	A	I	P	G	KWTSQDSLLG	1	0.0163051	46.065	38.443	41.084	0.83352	643250000	1	NaN	NaN	46.065	NaN	NaN
P49327	1589	P49327	P49327	Fatty acid synthase;[Acyl-carrier-protein] S-acetyltransferase;[Acyl-carrier-protein] S-malonyltransferase;3-oxoacyl-[acyl-carrier-protein] synthase;3-oxoacyl-[acyl-carrier-protein] reductase;3-hydroxyacyl-[acyl-carrier-protein] dehydratase;Enoyl-[acyl-carrier-protein] reductase;Oleoyl-[acyl-carrier-protein] hydrolase	FASN	RDIMLATGKLSPDAIPGKWTSQDSLLGMEFS	1939	P	3	2505		RDIMLATGKL	S	P	D	A	I	P	G	K	W	T	S	QDSLLGMEFS	1	0.0163051	46.065	38.443	41.084	0.83352	704300000	1	NaN	NaN	46.065	NaN	NaN
P49327	14	P49327	P49327	Fatty acid synthase;[Acyl-carrier-protein] S-acetyltransferase;[Acyl-carrier-protein] S-malonyltransferase;3-oxoacyl-[acyl-carrier-protein] synthase;3-oxoacyl-[acyl-carrier-protein] reductase;3-hydroxyacyl-[acyl-carrier-protein] dehydratase;Enoyl-[acyl-carrier-protein] reductase;Oleoyl-[acyl-carrier-protein] hydrolase	FASN	__MEEVVIAGMSGKLPESENLQEFWDNLIGG	1940	P	4	2505		__MEEVVIAG	M	S	G	K	L	P	E	S	E	N	L	QEFWDNLIGG	1	1.74e-10	74.575	69.169	74.575	-0.11233	145780000	NaN	1	1	NaN	58.925	74.575
P49327	1412	P49327	P49327	Fatty acid synthase;[Acyl-carrier-protein] S-acetyltransferase;[Acyl-carrier-protein] S-malonyltransferase;3-oxoacyl-[acyl-carrier-protein] synthase;3-oxoacyl-[acyl-carrier-protein] reductase;3-hydroxyacyl-[acyl-carrier-protein] dehydratase;Enoyl-[acyl-carrier-protein] reductase;Oleoyl-[acyl-carrier-protein] hydrolase	FASN	GSTLFLCRRPTPQDSPIFLPVDDTSFRWVES	1941	P	3	2505		GSTLFLCRRP	T	P	Q	D	S	P	I	F	L	P	V	DDTSFRWVES	0.99756	0.00120492	83.701	60.13	83.701	0.47746	150200000	0.99756	0.990989	NaN	83.701	78.202	NaN
P49327	1416	P49327	P49327	Fatty acid synthase;[Acyl-carrier-protein] S-acetyltransferase;[Acyl-carrier-protein] S-malonyltransferase;3-oxoacyl-[acyl-carrier-protein] synthase;3-oxoacyl-[acyl-carrier-protein] reductase;3-hydroxyacyl-[acyl-carrier-protein] dehydratase;Enoyl-[acyl-carrier-protein] reductase;Oleoyl-[acyl-carrier-protein] hydrolase	FASN	FLCRRPTPQDSPIFLPVDDTSFRWVESLKGI	1942	P	3	2505		FLCRRPTPQD	S	P	I	F	L	P	V	D	D	T	S	FRWVESLKGI	0.995023	0.00120492	83.701	60.13	83.701	0.47746	150200000	0.995023	0.980925	NaN	83.701	78.202	NaN
P49327	355	P49327	P49327	Fatty acid synthase;[Acyl-carrier-protein] S-acetyltransferase;[Acyl-carrier-protein] S-malonyltransferase;3-oxoacyl-[acyl-carrier-protein] synthase;3-oxoacyl-[acyl-carrier-protein] reductase;3-hydroxyacyl-[acyl-carrier-protein] dehydratase;Enoyl-[acyl-carrier-protein] reductase;Oleoyl-[acyl-carrier-protein] hydrolase	FASN	ALAKVLLSLEHGLWAPNLHFHSPNPEIPALL	1944	P	4	2505		ALAKVLLSLE	H	G	L	W	A	P	N	L	H	F	H	SPNPEIPALL	0.997637	0.000201232	113.15	98.664	80.984	0.20799	5878300000	0.996343	0.997186	0.997637	113.15	109.41	80.984
P49327	362	P49327	P49327	Fatty acid synthase;[Acyl-carrier-protein] S-acetyltransferase;[Acyl-carrier-protein] S-malonyltransferase;3-oxoacyl-[acyl-carrier-protein] synthase;3-oxoacyl-[acyl-carrier-protein] reductase;3-hydroxyacyl-[acyl-carrier-protein] dehydratase;Enoyl-[acyl-carrier-protein] reductase;Oleoyl-[acyl-carrier-protein] hydrolase	FASN	SLEHGLWAPNLHFHSPNPEIPALLDGRLQVV	1945	P	4	2505		SLEHGLWAPN	L	H	F	H	S	P	N	P	E	I	P	ALLDGRLQVV	0.997637	0.000201232	113.15	98.664	80.984	0.20799	5878300000	0.987392	0.988521	0.997637	113.15	109.41	80.984
P49327	364	P49327	P49327	Fatty acid synthase;[Acyl-carrier-protein] S-acetyltransferase;[Acyl-carrier-protein] S-malonyltransferase;3-oxoacyl-[acyl-carrier-protein] synthase;3-oxoacyl-[acyl-carrier-protein] reductase;3-hydroxyacyl-[acyl-carrier-protein] dehydratase;Enoyl-[acyl-carrier-protein] reductase;Oleoyl-[acyl-carrier-protein] hydrolase	FASN	EHGLWAPNLHFHSPNPEIPALLDGRLQVVDQ	1946	P	5	2505		EHGLWAPNLH	F	H	S	P	N	P	E	I	P	A	L	LDGRLQVVDQ	0.728481	0.0180952	48.422	34.156	48.422	0.73401	807070000	0.728481	0	NaN	48.422	NaN	NaN
P49368	436	P49368	P49368	T-complex protein 1 subunit gamma	CCT3	ALTEKSKAMTGVEQWPYRAVAQALEVIPRTL	1952	P	2	2510		ALTEKSKAMT	G	V	E	Q	W	P	Y	R	A	V	A	QALEVIPRTL	1	0.00227858	107.57	96.084	83.998	0.13312	55820000	NaN	1	1	NaN	107.57	92.838
P49368	143	P49368	P49368	T-complex protein 1 subunit gamma	CCT3	KALDDMISTLKKISIPVDISDSDMMLNIINS	1953	P	3	2510		KALDDMISTL	K	K	I	S	I	P	V	D	I	S	D	SDMMLNIINS	1	0.000393779	93.552	90.34	65.423	-0.19358	2393200000	1	1	1	93.552	73.322	49.287
P49368	6	P49368	P49368	T-complex protein 1 subunit gamma	CCT3	__________MMGHRPVLVLSQNTKRESGRK	1955	P	4	2510		__________	M	M	G	H	R	P	V	L	V	L	S	QNTKRESGRK	1	7.48e-07	169.58	155.9	46.892	0.042754	3080400000	1	1	1	94.461	67.153	169.58
P49368	409	P49368	P49368	T-complex protein 1 subunit gamma	CCT3	AMQVCRNVLLDPQLVPGGGASEMAVAHALTE	1956	P	3	2510		AMQVCRNVLL	D	P	Q	L	V	P	G	G	G	A	S	EMAVAHALTE	0.999973	3.62e-05	89.197	78.508	89.197	0.53154	505620000	NaN	0.999973	NaN	NaN	89.197	NaN
P49411	372	P49411	P49411	Elongation factor Tu, mitochondrial	TUFM	AQVYILSKEEGGRHKPFVSHFMPVMFSLTWD	1957	P	4	2513		AQVYILSKEE	G	G	R	H	K	P	F	V	S	H	F	MPVMFSLTWD	1	0.000218319	72.771	72.771	72.443	-1.4359	102520000	NaN	1	NaN	NaN	72.771	NaN
P49411	131	P49411	P49411	Elongation factor Tu, mitochondrial	TUFM	VEYSTAARHYAHTDCPGHADYVKNMITGTAP	1959	P	4	2513		VEYSTAARHY	A	H	T	D	C	P	G	H	A	D	Y	VKNMITGTAP	1	1.08e-07	175.49	165.67	71.513	0.7213	1825700000	1	1	NaN	175.49	62.287	NaN
P49411	146	P49411	P49411	Elongation factor Tu, mitochondrial	TUFM	PGHADYVKNMITGTAPLDGCILVVAANDGPM	1960	P	4	2513		PGHADYVKNM	I	T	G	T	A	P	L	D	G	C	I	LVVAANDGPM	0.979094	0.00185163	42.302	36.927	42.302	0.017806	181280000	0.979094	NaN	NaN	42.302	NaN	NaN
P49411	162	P49411	P49411	Elongation factor Tu, mitochondrial	TUFM	LDGCILVVAANDGPMPQTREHLLLARQIGVE	1962	P	4	2513		LDGCILVVAA	N	D	G	P	M	P	Q	T	R	E	H	LLLARQIGVE	0.554324	2.43e-05	102.05	102.05	102.05	-0.78439	870140000	0.554225	NaN	0.554324	97.437	NaN	102.05
P49411	396	P49411	P49411	Elongation factor Tu, mitochondrial	TUFM	MFSLTWDMACRIILPPEKELAMPGEDLKFNL	1963	P	5	2513		MFSLTWDMAC	R	I	I	L	P	P	E	K	E	L	A	MPGEDLKFNL	0.814386	9.79e-05	74.698	67.587	74.698	-0.25508	71939000	NaN	0.814386	NaN	NaN	74.698	NaN
P49419	362	P49419	P49419	Alpha-aminoadipic semialdehyde dehydrogenase	ALDH7A1	VNRLKKAYAQIRVGNPWDPNVLYGPLHTKQA	1964	P	3	2515		VNRLKKAYAQ	I	R	V	G	N	P	W	D	P	N	V	LYGPLHTKQA	1	0.00941995	79.92	79.92	79.92	0.1927	227620000	1	NaN	0.75659	79.92	NaN	59.9
P49419	365	P49419	P49419	Alpha-aminoadipic semialdehyde dehydrogenase	ALDH7A1	LKKAYAQIRVGNPWDPNVLYGPLHTKQAVSM	1965	P	3	2515		LKKAYAQIRV	G	N	P	W	D	P	N	V	L	Y	G	PLHTKQAVSM	1	0.0248611	79.92	79.92	79.92	0.1927	182740000	1	NaN	0	79.92	NaN	NaN
P49419	244	P49419	P49419	Alpha-aminoadipic semialdehyde dehydrogenase	ALDH7A1	AVTKIIAKVLEDNKLPGAICSLTCGGADIGT	1966	P	3	2515		AVTKIIAKVL	E	D	N	K	L	P	G	A	I	C	S	LTCGGADIGT	1	0.00187442	58.08	55.302	47.507	-0.26378	51461000	1	NaN	NaN	58.08	NaN	NaN
P49419	405	P49419	P49419	Alpha-aminoadipic semialdehyde dehydrogenase	ALDH7A1	KEGGTVVYGGKVMDRPGNYVEPTIVTGLGHD	1967	P	5	2515		KEGGTVVYGG	K	V	M	D	R	P	G	N	Y	V	E	PTIVTGLGHD	0.999996	4.17e-58	190.6	186.28	129.25	-0.90456	12239000000	0.999992	0.999996	0.998894	190.6	189.43	135.27
P49419	411	P49419	P49419	Alpha-aminoadipic semialdehyde dehydrogenase	ALDH7A1	VYGGKVMDRPGNYVEPTIVTGLGHDASIAHT	1968	P	3	2515		VYGGKVMDRP	G	N	Y	V	E	P	T	I	V	T	G	LGHDASIAHT	0.542129	4.02e-06	97.138	88.663	97.138	0.89784	82150000	0.542129	0	0	97.138	NaN	NaN
P49454	13	P49454	P49454	Centromere protein F	CENPF	___MSWALEEWKEGLPTRALQKIQELEGQLD	1970	P	2	2519		___MSWALEE	W	K	E	G	L	P	T	R	A	L	Q	KIQELEGQLD	1	0.0117475	66.92	24.582	66.92	3.2358	43021000	NaN	1	NaN	NaN	66.92	NaN
P49588	883	P49588	P49588	Alanine--tRNA ligase, cytoplasmic	AARS	AKALNEALKLFKMHSPQTSAMLFTVDNEAGK	1972	P	2	2523		AKALNEALKL	F	K	M	H	S	P	Q	T	S	A	M	LFTVDNEAGK	1	0.000765083	108.17	92.144	108.17	-0.17229	71690000	1	0.999367	NaN	108.17	45.527	NaN
P49711	580	P49711	P49711	Transcriptional repressor CTCF	CTCF	TRRNTMARHADNCAGPDGVEGENGGETKKSK	1975	P	4	2532		TRRNTMARHA	D	N	C	A	G	P	D	G	V	E	G	ENGGETKKSK	1	0.000319731	86.637	85.339	63.69	-0.53505	48886000	1	NaN	NaN	86.637	NaN	NaN
P49711	185	P49711	P49711	Transcriptional repressor CTCF	CTCF	GANGEVETLEQGELPPQEDPSWQKDPDYQPP	1976	P	4	2532		GANGEVETLE	Q	G	E	L	P	P	Q	E	D	P	S	WQKDPDYQPP	0.592031	7.28e-07	64.273	60.12	64.273	1.7471	53940000	0.592031	NaN	NaN	64.273	NaN	NaN
P49711	189	P49711	P49711	Transcriptional repressor CTCF	CTCF	EVETLEQGELPPQEDPSWQKDPDYQPPAKKT	1977	P	4	2532		EVETLEQGEL	P	P	Q	E	D	P	S	W	Q	K	D	PDYQPPAKKT	0.77044	7.28e-07	64.273	60.12	64.273	1.7471	53940000	0.77044	NaN	NaN	64.273	NaN	NaN
P49721	113	P49721	P49721	Proteasome subunit beta type-2	PSMB2	YHVNLLLAGYDEHEGPALYYMDYLAALAKAP	1978	P	4	2534		YHVNLLLAGY	D	E	H	E	G	P	A	L	Y	Y	M	DYLAALAKAP	1	4.85e-07	88.668	80.47	88.668	-0.22253	1167900000	1	0.999997	NaN	88.668	64.096	NaN
P49736	191	P49736	P49736	DNA replication licensing factor MCM2	MCM2	DLKGHSVREWVSMAGPRLEIHHRFKNFLRTH	1979	P	5	2535		DLKGHSVREW	V	S	M	A	G	P	R	L	E	I	H	HRFKNFLRTH	1	0.000765756	44.75	36.132	40.146	1.4908	121830000	NaN	NaN	1	NaN	NaN	44.75
P49736	320	P49736	P49736	DNA replication licensing factor MCM2	MCM2	LIRTSGVVTSCTGVLPQLSMVKYNCNKCNFV	1982	P	3	2535		LIRTSGVVTS	C	T	G	V	L	P	Q	L	S	M	V	KYNCNKCNFV	1	0.00253285	81.92	73.12	43.135	-1.1894	145240000	1	1	NaN	81.92	69.815	NaN
P49756	558	P49756	P49756	RNA-binding protein 25	RBM25	LEEIRQRLLAEGHPDPDAELQRMEQEAERRR	1985	P	4	2541		LEEIRQRLLA	E	G	H	P	D	P	D	A	E	L	Q	RMEQEAERRR	0.964711	0.0252814	47.392	35.196	47.392	-0.10062	43111000	NaN	NaN	0.964711	NaN	NaN	47.392
P49756	750	P49756	P49756	RNA-binding protein 25	RBM25	RKHIKSLIEKIPTAKPELFAYPLDWSIVDSI	1986	P	4	2541		RKHIKSLIEK	I	P	T	A	K	P	E	L	F	A	Y	PLDWSIVDSI	0.79677	0.0313152	44.721	41.355	44.721	0.49581	221900000	0	0.79677	NaN	NaN	44.721	NaN
P49756	756	P49756	P49756	RNA-binding protein 25	RBM25	LIEKIPTAKPELFAYPLDWSIVDSILMERRI	1987	P	4	2541		LIEKIPTAKP	E	L	F	A	Y	P	L	D	W	S	I	VDSILMERRI	0.79677	0.00636793	44.721	41.355	44.721	0.49581	245690000	0.602646	0.79677	NaN	42.181	44.721	NaN
P49761	605	P49761	P49761	Dual specificity protein kinase CLK3	CLK3	HVQLFDLMRRMLEFDPAQRITLAEALLHPFF	1988	P	5	2545		HVQLFDLMRR	M	L	E	F	D	P	A	Q	R	I	T	LAEALLHPFF	0.999953	2.24e-05	66.879	59.563	66.879	-0.41953	13379000	NaN	0.999953	NaN	NaN	66.879	NaN
P49790	414	P49790	P49790	Nuclear pore complex protein Nup153	NUP153	RIDNKCSTGYEKNMTPGQNREQRESGFSYPN	1990	P	4	2550		RIDNKCSTGY	E	K	N	M	T	P	G	Q	N	R	E	QRESGFSYPN	0.983836	5.06e-09	84.231	80.078	84.231	0.49853	96272000	NaN	0.983836	0.947135	NaN	84.231	52.777
P49792	736	P49792	P49792	E3 SUMO-protein ligase RanBP2	RANBP2	IIDDSDSNLSVVKKLPVPLESVKEMLNSVMQ	1992	P	4	2551		IIDDSDSNLS	V	V	K	K	L	P	V	P	L	E	S	VKEMLNSVMQ	0.520936	9.46e-05	84.702	84.702	84.702	-0.1771	328080000	NaN	0.520936	0	NaN	84.702	NaN
P49792	738	P49792	P49792	E3 SUMO-protein ligase RanBP2	RANBP2	DDSDSNLSVVKKLPVPLESVKEMLNSVMQEL	1993	P	3	2551		DDSDSNLSVV	K	K	L	P	V	P	L	E	S	V	K	EMLNSVMQEL	0.991722	6.07e-09	126.99	126.99	108.17	-0.021084	2964800000	0.893814	0.987149	0.991722	126.99	87.339	108.17
P49815	1441	P49815	P49815	Tuberin	TSC2	ESAAWSASGEDSRGQPEGPLPSSSPRSPSGL	1995	P	3	2554		ESAAWSASGE	D	S	R	G	Q	P	E	G	P	L	P	SSSPRSPSGL	0.710947	0.0329645	40.112	38.183	40.112	0.94198	5536600	NaN	0.710947	NaN	NaN	40.112	NaN
P49815	1444	P49815	P49815	Tuberin	TSC2	AWSASGEDSRGQPEGPLPSSSPRSPSGLRPR	1996	P	3	2554		AWSASGEDSR	G	Q	P	E	G	P	L	P	S	S	S	PRSPSGLRPR	0.710947	0.0329645	40.112	38.183	40.112	0.94198	5536600	NaN	0.710947	NaN	NaN	40.112	NaN
P49848	635	P49848	P49848	Transcription initiation factor TFIID subunit 6	TAF6	GPTSHPSPVPPPASSPSPLSGSALCGGKQEA	1997	P	4	2559		GPTSHPSPVP	P	P	A	S	S	P	S	P	L	S	G	SALCGGKQEA	0.820929	3.43e-05	51.216	49.812	51.216	0.29594	17406000	NaN	0.820929	NaN	NaN	51.216	NaN
P49848	637	P49848	P49848	Transcription initiation factor TFIID subunit 6	TAF6	TSHPSPVPPPASSPSPLSGSALCGGKQEAGD	1998	P	4	2559		TSHPSPVPPP	A	S	S	P	S	P	L	S	G	S	A	LCGGKQEAGD	0.820929	3.43e-05	51.216	49.812	51.216	0.29594	17406000	NaN	0.820929	NaN	NaN	51.216	NaN
P49848	654	P49848	P49848	Transcription initiation factor TFIID subunit 6	TAF6	SGSALCGGKQEAGDSPPPAPGTPKANGSQPN	1999	P	4	2559		SGSALCGGKQ	E	A	G	D	S	P	P	P	A	P	G	TPKANGSQPN	0.805238	3.43e-05	51.216	49.812	51.216	0.29594	17406000	NaN	0.805238	NaN	NaN	51.216	NaN
P49848	655	P49848	P49848	Transcription initiation factor TFIID subunit 6	TAF6	GSALCGGKQEAGDSPPPAPGTPKANGSQPNS	2000	P	4	2559		GSALCGGKQE	A	G	D	S	P	P	P	A	P	G	T	PKANGSQPNS	0.804761	3.43e-05	51.216	49.812	51.216	0.29594	17406000	NaN	0.804761	NaN	NaN	51.216	NaN
P49848	656	P49848	P49848	Transcription initiation factor TFIID subunit 6	TAF6	SALCGGKQEAGDSPPPAPGTPKANGSQPNSG	2001	P	4	2559		SALCGGKQEA	G	D	S	P	P	P	A	P	G	T	P	KANGSQPNSG	0.804855	3.43e-05	51.216	49.812	51.216	0.29594	17406000	NaN	0.804855	NaN	NaN	51.216	NaN
P49902	485	P49902	P49902	Cytosolic purine 5'-nucleotidase	NT5C2	YYPFSYLFRAAHVLMPHESTVEHTHVDINEM	2002	P	5	2560		YYPFSYLFRA	A	H	V	L	M	P	H	E	S	T	V	EHTHVDINEM	1	6.84e-05	80.904	75.001	80.904	-0.11312	106840000	NaN	1	NaN	NaN	80.904	NaN
P49902	503	P49902	P49902	Cytosolic purine 5'-nucleotidase	NT5C2	STVEHTHVDINEMESPLATRNRTSVDFKDTD	2003	P	6	2560		STVEHTHVDI	N	E	M	E	S	P	L	A	T	R	N	RTSVDFKDTD	0.559599	0.0040834	45.596	45.596	45.596	0.42976	9069500	NaN	NaN	0.559599	NaN	NaN	45.596
P49903	62	P49903	P49903	Selenide, water dikinase 1	SEPHS1	ENHFQEDEQFLGAVMPRLGIGMDTCVIPLRH	2005	P	5	2561		ENHFQEDEQF	L	G	A	V	M	P	R	L	G	I	G	MDTCVIPLRH	1	6.94e-06	70.151	61.996	70.151	-0.966	298810000	1	0.999972	NaN	70.151	45.511	NaN
P49915	359	P49915	P49915	GMP synthase [glutamine-hydrolyzing]	GMPS	FVKIANEVIGEMNLKPEEVFLAQGTLRPDLI	2006	P	5	2563		FVKIANEVIG	E	M	N	L	K	P	E	E	V	F	L	AQGTLRPDLI	1	7.34e-10	119.3	106.62	119.3	0.26396	901990000	1	0.999938	0.999938	119.3	73.665	89.823
P49915	686	P49915	P49915	GMP synthase [glutamine-hydrolyzing]	GMPS	KIPGISRIMYDLTSKPPGTTEWE________	2007	P	2	2563		KIPGISRIMY	D	L	T	S	K	P	P	G	T	T	E	WE________	1	0.000557656	119.45	103.19	81.676	-0.54998	382870000	1	1	1	98.156	119.45	81.676
P49915	687	P49915	P49915	GMP synthase [glutamine-hydrolyzing]	GMPS	IPGISRIMYDLTSKPPGTTEWE_________	2008	P	2	2563		IPGISRIMYD	L	T	S	K	P	P	G	T	T	E	W	E_________	1	0.000557656	119.45	103.19	81.676	-0.54998	382870000	1	1	1	98.156	119.45	81.676
P49916	550	P49916	P49916	DNA ligase 3	LIG3	PHKVAHFKDYIPQAFPGGHSMILDSEVLLID	2010	P	4	2564		PHKVAHFKDY	I	P	Q	A	F	P	G	G	H	S	M	ILDSEVLLID	0.999956	0.00018427	92.238	83.25	92.238	-1.0682	75675000	0.999956	NaN	NaN	92.238	NaN	NaN
P50213	74	P50213	P50213	Isocitrate dehydrogenase [NAD] subunit alpha, mitochondrial	IDH3A	APIQWEERNVTAIQGPGGKWMIPSEAKESMD	2011	P	3	2573		APIQWEERNV	T	A	I	Q	G	P	G	G	K	W	M	IPSEAKESMD	0.962176	0.00795223	71.002	65.282	71.002	-0.57259	24031000	NaN	0.962176	NaN	NaN	71.002	NaN
P50213	81	P50213	P50213	Isocitrate dehydrogenase [NAD] subunit alpha, mitochondrial	IDH3A	RNVTAIQGPGGKWMIPSEAKESMDKNKMGLK	2012	P	4	2573		RNVTAIQGPG	G	K	W	M	I	P	S	E	A	K	E	SMDKNKMGLK	0.886431	0.00801238	61.102	50.509	48.607	1.8857	98126000	NaN	0.858349	0.886431	NaN	61.102	48.607
P50213	304	P50213	P50213	Isocitrate dehydrogenase [NAD] subunit alpha, mitochondrial	IDH3A	VHGTAPDIAGKDMANPTALLLSAVMMLRHMG	2013	P	3	2573		VHGTAPDIAG	K	D	M	A	N	P	T	A	L	L	L	SAVMMLRHMG	1	0.000136678	101.39	89.1	101.39	0.10775	56917000	1	1	NaN	88.133	101.39	NaN
P50225	244	P50225	P50225	Sulfotransferase 1A1	SULT1A1	FKEMKKNPMTNYTTVPQEFMDHSISPFMRKG	2016	P	3	2577		FKEMKKNPMT	N	Y	T	T	V	P	Q	E	F	M	D	HSISPFMRKG	1	0.00174531	60.464	60.464	60.464	-0.22503	314790000	0.868251	0.586173	1	54.261	50.783	60.464
P50395	254	P50395	P50395	Rab GDP dissociation inhibitor beta	GDI2	ARLSAIYGGTYMLNKPIEEIIVQNGKVIGVK	2019	P	3	2579		ARLSAIYGGT	Y	M	L	N	K	P	I	E	E	I	I	VQNGKVIGVK	1	0.024418	55.988	49.624	55.988	1.1332	31599000	NaN	NaN	1	NaN	NaN	55.988
P50395	201	P50395	P50395	Rab GDP dissociation inhibitor beta	GDI2	GHALALYRTDDYLDQPCYETINRIKLYSESL	2020	P	2	2579		GHALALYRTD	D	Y	L	D	Q	P	C	Y	E	T	I	NRIKLYSESL	1	0.00958295	113.63	105.12	90.653	-0.52127	136670000	1	NaN	NaN	113.63	NaN	NaN
P50395	37	P50395	P50395	Rab GDP dissociation inhibitor beta	GDI2	IMSVNGKKVLHMDRNPYYGGESASITPLEDL	2021	P	4	2579		IMSVNGKKVL	H	M	D	R	N	P	Y	Y	G	G	E	SASITPLEDL	1	1.82e-09	134.31	130.01	123.43	1.4155	4454900000	1	1	1	134.31	96.903	123.43
P50402	183	P50402	P50402	Emerin	EMD	RPVSASRSSLDLSYYPTSSSTSFMSSSSSSS	2022	P	2	2580		RPVSASRSSL	D	L	S	Y	Y	P	T	S	S	S	T	SFMSSSSSSS	1	0.0158627	45.438	34.823	45.438	3.6175	0	1	NaN	NaN	45.438	NaN	NaN
P50454	272	P50454	P50454	Serpin H1	SERPINH1	EMPLAHKLSSLIILMPHHVEPLERLEKLLTK	2025	P	3	2584		EMPLAHKLSS	L	I	I	L	M	P	H	H	V	E	P	LERLEKLLTK	0.999597	3.1e-06	129.15	114.84	129.15	-0.98871	48885000	NaN	0.999597	NaN	NaN	129.15	NaN
P50502;Q8NFI4	184;184	P50502	P50502	Hsc70-interacting protein;Putative protein FAM10A5	ST13;ST13P5	RDCDRAIEINPDSAQPYKWRGKAHRLLGHWE	2026	P	3	2586		RDCDRAIEIN	P	D	S	A	Q	P	Y	K	W	R	G	KAHRLLGHWE	1	0.000911402	115.8	99.921	66.533	0.086943	1354800000	1	0.999999	0.999789	84.468	115.8	83.729
P50502	226	P50502	P50502	Hsc70-interacting protein	ST13	LDYDEDASAMLKEVQPRAQKIAEHRRKYERK	2027	P	5	2586		LDYDEDASAM	L	K	E	V	Q	P	R	A	Q	K	I	AEHRRKYERK	1	0.0016457	41.209	36.893	41.209	-0.44661	121940000	1	NaN	NaN	41.209	NaN	NaN
P50542	553	P50542	P50542	Peroxisomal targeting signal 1 receptor	PEX5	SEEAVAAYRRALELQPGYIRSRYNLGISCIN	2028	P	2	2588		SEEAVAAYRR	A	L	E	L	Q	P	G	Y	I	R	S	RYNLGISCIN	1	0.0120215	124.08	34.937	124.08	0.9917	420360000	NaN	1	NaN	NaN	124.08	NaN
P50542	79	P50542	P50542	Peroxisomal targeting signal 1 receptor	PEX5	AEFLQDQNAPLVSRAPQTFKMDDLLAEMQQI	2029	P	3	2588		AEFLQDQNAP	L	V	S	R	A	P	Q	T	F	K	M	DDLLAEMQQI	1	0.0156447	42.041	34.929	42.041	-0.84237	0	NaN	1	NaN	NaN	42.041	NaN
P50552	333	P50552	P50552	Vasodilator-stimulated phosphoprotein	VASP	PRMKSSSSVTTSETQPCTPSSSDYSDLQRVK	2030	P	3	2590		PRMKSSSSVT	T	S	E	T	Q	P	C	T	P	S	S	SDYSDLQRVK	0.994891	0.000402128	72.532	70.606	72.532	-0.95708	75367000	0.993919	0.994891	NaN	69.152	72.532	NaN
P50851	1499	P50851	P50851	Lipopolysaccharide-responsive and beige-like anchor protein	LRBA	SAAKSPVDIVTGGISPVRDLDRLLQDMDINR	2032	P	4	2601		SAAKSPVDIV	T	G	G	I	S	P	V	R	D	L	D	RLLQDMDINR	0.999992	0.00249952	56.625	46.109	56.625	0.28682	52031000	NaN	0.999992	NaN	NaN	56.625	NaN
P50990	245	P50990	P50990	T-complex protein 1 subunit theta	CCT8	DVTSVKDAKIAVYSCPFDGMITETKGTVLIK	2035	P	3	2605		DVTSVKDAKI	A	V	Y	S	C	P	F	D	G	M	I	TETKGTVLIK	1	0.000185819	77.287	70.01	62.19	1.0181	353050000	1	1	NaN	68.676	77.287	NaN
P50990	192	P50990	P50990	T-complex protein 1 subunit theta	CCT8	VFLAKLIAQACVSIFPDSGHFNVDNIRVCKI	2036	P	3	2605		VFLAKLIAQA	C	V	S	I	F	P	D	S	G	H	F	NVDNIRVCKI	1	0.000831612	67.866	55.375	55.206	-0.64389	120660000	1	1	NaN	55.206	67.866	NaN
P50990	487	P50990	P50990	T-complex protein 1 subunit theta	CCT8	QEGNKNVGLDIEAEVPAVKDMLEAGILDTYL	2039	P	5	2605		QEGNKNVGLD	I	E	A	E	V	P	A	V	K	D	M	LEAGILDTYL	1	1.74e-09	99.709	95.788	65.71	0.23637	238710000	1	1	NaN	99.709	65.71	NaN
P50990	431	P50990	P50990	T-complex protein 1 subunit theta	CCT8	EIELAKQITSYGETCPGLEQYAIKKFAEAFE	2040	P	3	2605		EIELAKQITS	Y	G	E	T	C	P	G	L	E	Q	Y	AIKKFAEAFE	1	0.0119301	56.817	53.756	56.817	1.1922	16846000	1	NaN	NaN	56.817	NaN	NaN
P50991	462	P50991	P50991	T-complex protein 1 subunit delta	CCT4	ESYCVRAFADAMEVIPSTLAENAGLNPISTV	2041	P	4	2606		ESYCVRAFAD	A	M	E	V	I	P	S	T	L	A	E	NAGLNPISTV	1	2.38e-22	120.93	105.04	120.93	4.2465	164390000	NaN	1	NaN	NaN	120.93	NaN
P50991	154	P50991	P50991	T-complex protein 1 subunit delta	CCT4	KALEKGIEILTDMSRPVELSDRETLLNSATT	2042	P	4	2606		KALEKGIEIL	T	D	M	S	R	P	V	E	L	S	D	RETLLNSATT	1	9.9e-124	255.96	244.31	41.89	0.017163	1694800000	1	1	1	131.5	255.96	93.278
P51532	605	P51532	P51532	Transcription activator BRG1	SMARCA4	ENAEGQTPAIGPDGEPLDETSQMSDLPVKVI	2045	P	3	2625		ENAEGQTPAI	G	P	D	G	E	P	L	D	E	T	S	QMSDLPVKVI	0.791499	0.0306695	48.76	46.595	48.76	-0.81389	105570000	NaN	0.791499	NaN	NaN	48.76	NaN
P51532	616	P51532	P51532	Transcription activator BRG1	SMARCA4	PDGEPLDETSQMSDLPVKVIHVESGKILTGT	2046	P	4	2625		PDGEPLDETS	Q	M	S	D	L	P	V	K	V	I	H	VESGKILTGT	0.983891	0.00048167	41.514	38.435	41.514	0.91065	12704000	0.983891	0	NaN	41.514	NaN	NaN
P51553	364	P51553	P51553	Isocitrate dehydrogenase [NAD] subunit gamma, mitochondrial	IDH3G	RKAVLASMDNENMHTPDIGGQGTTSEAIQDV	2047	P	4	2626		RKAVLASMDN	E	N	M	H	T	P	D	I	G	G	Q	GTTSEAIQDV	1	1.13e-09	127.59	123.05	74.321	1.2785	227600000	1	1	1	66.511	127.59	96.46
P51610	245	P51610	P51610	Host cell factor 1;HCF N-terminal chain 1;HCF N-terminal chain 2;HCF N-terminal chain 3;HCF N-terminal chain 4;HCF N-terminal chain 5;HCF N-terminal chain 6;HCF C-terminal chain 1;HCF C-terminal chain 2;HCF C-terminal chain 3;HCF C-terminal chain 4;HCF C-terminal chain 5;HCF C-terminal chain 6	HCFC1	GDLWTLDIDTLTWNKPSLSGVAPLPRSLHSA	2052	P	3	2633		GDLWTLDIDT	L	T	W	N	K	P	S	L	S	G	V	APLPRSLHSA	0.943771	7.17e-37	174.7	151.31	174.7	1.5253	95279000	NaN	0.943771	0.902708	NaN	174.7	78.202
P51610	252	P51610	P51610	Host cell factor 1;HCF N-terminal chain 1;HCF N-terminal chain 2;HCF N-terminal chain 3;HCF N-terminal chain 4;HCF N-terminal chain 5;HCF N-terminal chain 6;HCF C-terminal chain 1;HCF C-terminal chain 2;HCF C-terminal chain 3;HCF C-terminal chain 4;HCF C-terminal chain 5;HCF C-terminal chain 6	HCFC1	IDTLTWNKPSLSGVAPLPRSLHSATTIGNKM	2053	P	3	2633		IDTLTWNKPS	L	S	G	V	A	P	L	P	R	S	L	HSATTIGNKM	0.916328	7.17e-37	174.7	151.31	174.7	1.5253	95279000	NaN	0.916328	0.8792	NaN	174.7	78.202
P51610	505	P51610	P51610	Host cell factor 1;HCF N-terminal chain 1;HCF N-terminal chain 2;HCF N-terminal chain 3;HCF N-terminal chain 4;HCF N-terminal chain 5;HCF N-terminal chain 6;HCF C-terminal chain 1;HCF C-terminal chain 2;HCF C-terminal chain 3;HCF C-terminal chain 4;HCF C-terminal chain 5;HCF C-terminal chain 6	HCFC1	TGPQATTGTPLVTMRPASQAGKAPVTVTSLP	2055	P	3	2633		TGPQATTGTP	L	V	T	M	R	P	A	S	Q	A	G	KAPVTVTSLP	0.982464	2.86e-05	90.534	77.732	50.215	-0.52756	108260000	NaN	0.982464	NaN	NaN	90.534	NaN
P51610	1955	P51610	P51610	Host cell factor 1;HCF N-terminal chain 1;HCF N-terminal chain 2;HCF N-terminal chain 3;HCF N-terminal chain 4;HCF N-terminal chain 5;HCF N-terminal chain 6;HCF C-terminal chain 1;HCF C-terminal chain 2;HCF C-terminal chain 3;HCF C-terminal chain 4;HCF C-terminal chain 5;HCF C-terminal chain 6	HCFC1	SSTPAQLAFMRVYCGPSPSCLVQSSSLSNAH	2056	P	3	2633		SSTPAQLAFM	R	V	Y	C	G	P	S	P	S	C	L	VQSSSLSNAH	0.932342	5.92e-05	85.467	82.925	85.467	0.64988	20475000	0.932342	NaN	NaN	85.467	NaN	NaN
P51617	560	P51617	P51617	Interleukin-1 receptor-associated kinase 1	IRAK1	NSYVSSTGRAHSGAAPWQPLAAPSGASAQAA	2057	P	3	2634		NSYVSSTGRA	H	S	G	A	A	P	W	Q	P	L	A	APSGASAQAA	0.999961	0.00599226	95.519	87.355	95.519	0.92676	16918000	0.999961	NaN	NaN	95.519	NaN	NaN
P51617	563	P51617	P51617	Interleukin-1 receptor-associated kinase 1	IRAK1	VSSTGRAHSGAAPWQPLAAPSGASAQAAEQL	2058	P	3	2634		VSSTGRAHSG	A	A	P	W	Q	P	L	A	A	P	S	GASAQAAEQL	0.999956	0.00599226	95.519	87.355	95.519	0.92676	16918000	0.999956	NaN	NaN	95.519	NaN	NaN
P51654	455	P51654	P51654	Glypican-3;Secreted glypican-3	GPC3	GMKNQFNLHELKMKGPEPVVSQIIDKLKHIN	2061	P	4	2637		GMKNQFNLHE	L	K	M	K	G	P	E	P	V	V	S	QIIDKLKHIN	0.994078	0.00230703	74.772	69.454	74.772	0.14708	13430000	NaN	0.994078	NaN	NaN	74.772	NaN
P51659	513	P51659	P51659	Peroxisomal multifunctional enzyme type 2;(3R)-hydroxyacyl-CoA dehydrogenase;Enoyl-CoA hydratase 2	HSD17B4	SLNQAALYRLSGDWNPLHIDPNFASLAGFDK	2062	P	4	2638		SLNQAALYRL	S	G	D	W	N	P	L	H	I	D	P	NFASLAGFDK	1	2.01e-07	107.14	93.898	82.784	0.81177	133430000	0.999321	1	NaN	46.898	107.14	NaN
P51659	518	P51659	P51659	Peroxisomal multifunctional enzyme type 2;(3R)-hydroxyacyl-CoA dehydrogenase;Enoyl-CoA hydratase 2	HSD17B4	ALYRLSGDWNPLHIDPNFASLAGFDKPILHG	2063	P	4	2638		ALYRLSGDWN	P	L	H	I	D	P	N	F	A	S	L	AGFDKPILHG	1	2.01e-07	107.14	93.898	82.784	0.81177	133430000	0.999321	1	NaN	46.898	107.14	NaN
P51788	12	P51788	P51788	Chloride channel protein 2	CLCN2	____MAAAAAEEGMEPRALQYEQTLMYGRYT	2065	P	2	2646		____MAAAAA	E	E	G	M	E	P	R	A	L	Q	Y	EQTLMYGRYT	1	0.00159134	89.247	70.467	89.247	0.066812	15801000	NaN	1	NaN	NaN	89.247	NaN
P51790	660	P51790	P51790	H(+)/Cl(-) exchange transporter 3	CLCN3	KEEFTHTTLAADVMRPRRNDPPLAVLTQDNM	2066	P	5	2647		KEEFTHTTLA	A	D	V	M	R	P	R	R	N	D	P	PLAVLTQDNM	1	1.35e-05	108.64	96.857	108.64	-0.081905	504230000	1	0.999996	1	108.64	60.104	88.571
P51858	27	P51858	P51858	Hepatoma-derived growth factor	HDGF	CGDLVFAKMKGYPHWPARIDEMPEAAVKSTA	2070	P	3	2662		CGDLVFAKMK	G	Y	P	H	W	P	A	R	I	D	E	MPEAAVKSTA	0.995908	0.00736035	66.068	57.136	50.053	-0.94473	130300000	0.942734	0.995908	NaN	55.763	66.068	NaN
P51858	34	P51858	P51858	Hepatoma-derived growth factor	HDGF	KMKGYPHWPARIDEMPEAAVKSTANKYQVFF	2071	P	3	2662		KMKGYPHWPA	R	I	D	E	M	P	E	A	A	V	K	STANKYQVFF	0.961242	0.000527944	77.023	77.023	50.053	-0.94473	461990000	0.828403	0.961242	0.513654	54.658	77.023	55.007
P51858	112	P51858	P51858	Hepatoma-derived growth factor	HDGF	ASGYQSSQKKSCVEEPEPEPEAAEGDGDKKG	2072	P	3	2662		ASGYQSSQKK	S	C	V	E	E	P	E	P	E	P	E	AAEGDGDKKG	0.993892	0.007267	59.372	58.812	51.819	-0.43692	226000000	0.993892	0.962237	0.989929	51.819	44.382	59.372
P51946	50	P51946	P51946	Cyclin-H	CCNH	VANGKVLPNDPVFLEPHEEMTLCKYYEKRLL	2073	P	3	2663		VANGKVLPND	P	V	F	L	E	P	H	E	E	M	T	LCKYYEKRLL	0.997631	0.0297642	48.848	41.632	48.848	-0.19583	99315000	NaN	0.997631	NaN	NaN	48.848	NaN
P51948	261	P51948	P51948	CDK-activating kinase assembly factor MAT1	MNAT1	YEYQPLQIETYGPHVPELEMLGRLGYLNHVR	2074	P	3	2664		YEYQPLQIET	Y	G	P	H	V	P	E	L	E	M	L	GRLGYLNHVR	0.934817	0.000146516	87.339	76.917	85.376	0.89797	86245000	0.778121	NaN	0.934817	87.339	NaN	85.376
P51970	39	P51970	P51970	NADH dehydrogenase [ubiquinone] 1 alpha subcomplex subunit 8	NDUFA8	VLKAAAHHYGAQCDKPNKEFMLCRWEEKDPR	2075	P	5	2670		VLKAAAHHYG	A	Q	C	D	K	P	N	K	E	F	M	LCRWEEKDPR	1	0.00206204	58.997	55.988	58.997	-0.48742	31461000	NaN	1	NaN	NaN	58.997	NaN
P51991	28	P51991	P51991	Heterogeneous nuclear ribonucleoprotein A3	HNRNPA3	DSGRRRRRRGEEGHDPKEPEQLRKLFIGGLS	2076	P	4	2671		DSGRRRRRRG	E	E	G	H	D	P	K	E	P	E	Q	LRKLFIGGLS	0.999847	0.0142301	62.377	53.334	56.08	0.99602	1011300000	0.999847	0.998608	0.999404	56.08	51.695	62.377
P51991	97	P51991	P51991	Heterogeneous nuclear ribonucleoprotein A3	HNRNPA3	TYSCVEEVDAAMCARPHKVDGRVVEPKRAVS	2077	P	5	2671		TYSCVEEVDA	A	M	C	A	R	P	H	K	V	D	G	RVVEPKRAVS	1	2.71e-06	116.24	112.14	56.298	0.12153	1665600000	1	1	1	90.22	116.24	56.298
P52209	439	P52209	P52209	6-phosphogluconate dehydrogenase, decarboxylating	PGD	TTALSFYDGYRHEMLPASLIQAQRDYFGAHT	2080	P	3	2672		TTALSFYDGY	R	H	E	M	L	P	A	S	L	I	Q	AQRDYFGAHT	0.949423	0.00228596	52.777	39.628	52.777	1.7	6156400	NaN	0.949423	NaN	NaN	52.777	NaN
P52209	461	P52209	P52209	6-phosphogluconate dehydrogenase, decarboxylating	PGD	QRDYFGAHTYELLAKPGQFIHTNWTGHGGTV	2081	P	3	2672		QRDYFGAHTY	E	L	L	A	K	P	G	Q	F	I	H	TNWTGHGGTV	1	0.014185	44.616	40.342	44.616	-3.6552	0	NaN	1	NaN	NaN	44.616	NaN
P52209	143	P52209	P52209	6-phosphogluconate dehydrogenase, decarboxylating	PGD	VSGGEEGARYGPSLMPGGNKEAWPHIKTIFQ	2082	P	4	2672		VSGGEEGARY	G	P	S	L	M	P	G	G	N	K	E	AWPHIKTIFQ	0.999961	0.0151329	48.547	39.293	48.547	0.036131	2173100000	0.9997	0.999925	0.999961	42.708	47.754	48.547
P52209	151	P52209	P52209	6-phosphogluconate dehydrogenase, decarboxylating	PGD	RYGPSLMPGGNKEAWPHIKTIFQGIAAKVGT	2083	P	4	2672		RYGPSLMPGG	N	K	E	A	W	P	H	I	K	T	I	FQGIAAKVGT	0.999896	0.00253256	62.813	58.946	48.547	0.036131	2311800000	0.999272	0.99985	0.999896	42.708	47.754	62.813
P52272	79	P52272	P52272	Heterogeneous nuclear ribonucleoprotein M	HNRNPM	YANPTKRYRAFITNIPFDVKWQSLKDLVKEK	2084	P	2	2673		YANPTKRYRA	F	I	T	N	I	P	F	D	V	K	W	QSLKDLVKEK	1	0.00758622	91.858	78.445	91.858	-2.1691	0	1	NaN	NaN	91.858	NaN	NaN
P52272	352	P52272	P52272	Heterogeneous nuclear ribonucleoprotein M	HNRNPM	EGIGFGINKMGGMEGPFGGGMENMGRFGSGM	2087	P	2	2673		EGIGFGINKM	G	G	M	E	G	P	F	G	G	G	M	ENMGRFGSGM	1	0.000113604	109.44	109.44	83.204	0.3717	2321800000	1	1	1	97.463	109.44	90.653
P52272	459	P52272	P52272	Heterogeneous nuclear ribonucleoprotein M	HNRNPM	MGSVERMGSGIERMGPLGLDHMASSIERMGQ	2089	P	3	2673		MGSVERMGSG	I	E	R	M	G	P	L	G	L	D	H	MASSIERMGQ	1	0.0179622	51.265	43.484	51.265	-1.4465	25092000	NaN	NaN	1	NaN	NaN	51.265
P52272	171	P52272	P52272	Heterogeneous nuclear ribonucleoprotein M	HNRNPM	AMQKVMATTGGMGMGPGGPGMITIPPSILNN	2090	P	3	2673		AMQKVMATTG	G	M	G	M	G	P	G	G	P	G	M	ITIPPSILNN	0.980105	1.58e-11	110.32	110.32	66.381	1.7125	687740000	0.980105	0.800581	0.622523	97.003	104.35	110.32
P52292	174	P52292	P52292	Importin subunit alpha-1	KPNA2	VDGGAIPAFISLLASPHAHISEQAVWALGNI	2092	P	3	2674		VDGGAIPAFI	S	L	L	A	S	P	H	A	H	I	S	EQAVWALGNI	0.802139	7.68e-05	48.348	43.535	48.348	-4.0594	25576000	0.802139	NaN	NaN	48.348	NaN	NaN
P52292	57	P52292	P52292	Importin subunit alpha-1	KPNA2	KKDDQMLKRRNVSSFPDDATSPLQENRNNQG	2093	P	3	2674		KKDDQMLKRR	N	V	S	S	F	P	D	D	A	T	S	PLQENRNNQG	1	0.0153594	47.919	45.407	47.919	-0.76825	266400000	1	NaN	NaN	47.919	NaN	NaN
P52292	63	P52292	P52292	Importin subunit alpha-1	KPNA2	LKRRNVSSFPDDATSPLQENRNNQGTVNWSV	2094	P	3	2674		LKRRNVSSFP	D	D	A	T	S	P	L	Q	E	N	R	NNQGTVNWSV	1	0.0153594	47.919	45.407	47.919	-0.76825	266400000	1	NaN	NaN	47.919	NaN	NaN
P52306	60	P52306	P52306	Rap1 GTPase-GDP dissociation stimulator 1	RAP1GDS1	IQASGILQLFASLLTPQSSCKAKVANIIAEV	2095	P	3	2677		IQASGILQLF	A	S	L	L	T	P	Q	S	S	C	K	AKVANIIAEV	1	0.0233944	47.814	39.626	47.814	3.0622	3338000	1	NaN	NaN	47.814	NaN	NaN
P52565	151	P52565	P52565	Rho GDP-dissociation inhibitor 1	ARHGDIA	GVKIDKTDYMVGSYGPRAEEYEFLTPVEEAP	2099	P	4	2682		GVKIDKTDYM	V	G	S	Y	G	P	R	A	E	E	Y	EFLTPVEEAP	0.999999	3.99e-05	76.164	61.118	76.164	-1.0098	722500000	0.999942	0.999999	NaN	53.073	76.164	NaN
P52597	233	P52597	P52597	Heterogeneous nuclear ribonucleoprotein F;Heterogeneous nuclear ribonucleoprotein F, N-terminally processed	HNRNPF	RYIGIVKQAGLERMRPGAYSTGYGGYEEYSG	2102	P	3	2685		RYIGIVKQAG	L	E	R	M	R	P	G	A	Y	S	T	GYGGYEEYSG	1	0.000738571	57.262	52.861	40.764	-1.7065	19489000	1	NaN	NaN	57.262	NaN	NaN
P52701	55	P52701	P52701	DNA mismatch repair protein Msh6	MSH6	ASPSPGGDAAWSEAGPGPRPLARSASPPKAK	2103	P	3	2689		ASPSPGGDAA	W	S	E	A	G	P	G	P	R	P	L	ARSASPPKAK	0.869159	2.5e-12	139.28	120.03	110.68	0.4802	777040000	0.869159	0.62292	0.73017	139.28	75.23	82.486
P52701	57	P52701	P52701	DNA mismatch repair protein Msh6	MSH6	PSPGGDAAWSEAGPGPRPLARSASPPKAKNL	2104	P	3	2689		PSPGGDAAWS	E	A	G	P	G	P	R	P	L	A	R	SASPPKAKNL	0.869159	2.5e-12	139.28	120.03	110.68	0.4802	777040000	0.869159	0.62292	0.73017	139.28	75.23	82.486
P52701	1077	P52701	P52701	DNA mismatch repair protein Msh6	MSH6	CLANYSRGGDGPMCRPVILLPEDTPPFLELK	2106	P	2	2689		CLANYSRGGD	G	P	M	C	R	P	V	I	L	L	P	EDTPPFLELK	0.624603	1.52e-07	133.71	102.32	133.71	0.67199	2082700000	0.624603	0.553204	0.565747	133.71	78.45	84.365
P52732	121	P52732	P52732	Kinesin-like protein KIF11	KIF11	QTGTGKTFTMEGERSPNEEYTWEEDPLAGII	2108	P	3	2690		QTGTGKTFTM	E	G	E	R	S	P	N	E	E	Y	T	WEEDPLAGII	1	0.000733991	85.467	83.06	85.467	0.14927	79813000	0.999624	NaN	1	47.018	NaN	85.467
P52948	1785	P52948	P52948	Nuclear pore complex protein Nup98-Nup96;Nuclear pore complex protein Nup98;Nuclear pore complex protein Nup96	NUP98	DSTPDPQRVPLRLLAPHIGRLPMPEDYAMDE	2111	P	5	2714		DSTPDPQRVP	L	R	L	L	A	P	H	I	G	R	L	PMPEDYAMDE	0.559917	0.000260125	96.44	87.375	96.44	0.10003	99802000	NaN	NaN	0.559917	NaN	NaN	96.44
P52948	1793	P52948	P52948	Nuclear pore complex protein Nup98-Nup96;Nuclear pore complex protein Nup98;Nuclear pore complex protein Nup96	NUP98	VPLRLLAPHIGRLPMPEDYAMDELRSLTQSY	2112	P	4	2714		VPLRLLAPHI	G	R	L	P	M	P	E	D	Y	A	M	DELRSLTQSY	0.516927	0.000915964	59.469	54.491	59.469	-0.36645	132660000	0.516927	NaN	0.51231	59.469	NaN	51.956
P52948	731	P52948	P52948	Nuclear pore complex protein Nup98-Nup96;Nuclear pore complex protein Nup98;Nuclear pore complex protein Nup96	NUP98	QDDREEIENNSYHMHPAGIILTKVGYYTIPS	2113	P	5	2714		QDDREEIENN	S	Y	H	M	H	P	A	G	I	I	L	TKVGYYTIPS	1	0.000166681	42.064	40.913	42.064	-2.5334	16556000	NaN	1	NaN	NaN	42.064	NaN
P52948	593	P52948	P52948	Nuclear pore complex protein Nup98-Nup96;Nuclear pore complex protein Nup98;Nuclear pore complex protein Nup96	NUP98	GLDDDEPSLANGAFMPKKSIKKLVLKNLNNS	2114	P	3	2714		GLDDDEPSLA	N	G	A	F	M	P	K	K	S	I	K	KLVLKNLNNS	0.999536	0.030623	52.03	44.408	52.03	-0.51667	0	NaN	0.999536	NaN	NaN	52.03	NaN
P53384	246	P53384	P53384	Cytosolic Fe-S cluster assembly factor NUBP1	NUBP1	SGFICPKCKKESQIFPPTTGGAELMCQDLEV	2121	P	3	2724		SGFICPKCKK	E	S	Q	I	F	P	P	T	T	G	G	AELMCQDLEV	0.549695	1.4e-05	75.23	68.726	62.237	0.14907	141280000	0.544457	0.549695	0.497501	75.23	62.237	44.615
P53384	5	P53384	P53384	Cytosolic Fe-S cluster assembly factor NUBP1	NUBP1	___________MEEVPHDCPGADSAQAGRGA	2123	P	2	2724		__________	_	M	E	E	V	P	H	D	C	P	G	ADSAQAGRGA	0.920125	0.0313246	41.052	41.052	41.052	0.0081525	5516400	0.920125	NaN	NaN	41.052	NaN	NaN
P53396	524	P53396	P53396	ATP-citrate synthase	ACLY	VQGMLDFDYVCSRDEPSVAAMVYPFTGDHKQ	2125	P	3	2725		VQGMLDFDYV	C	S	R	D	E	P	S	V	A	A	M	VYPFTGDHKQ	0.999769	0.000265929	51.568	51.568	50.608	-0.47609	372280000	0.999769	NaN	0.99638	50.608	NaN	51.568
P53396	48	P53396	P53396	ATP-citrate synthase	ACLY	RVTPDTDWARLLQDHPWLLSQNLVVKPDQLI	2127	P	3	2725		RVTPDTDWAR	L	L	Q	D	H	P	W	L	L	S	Q	NLVVKPDQLI	1	4.47e-06	89.402	76.724	54.857	0.43489	1258900000	1	1	0.999872	89.402	54.857	59.547
P53396	812	P53396	P53396	ATP-citrate synthase	ACLY	IQSVYEDLVANGVIVPAQEVPPPTVPMDYSW	2128	P	4	2725		IQSVYEDLVA	N	G	V	I	V	P	A	Q	E	V	P	PPTVPMDYSW	0.892598	8.58e-07	59.898	52.867	59.898	0.01568	69969000	NaN	0.892598	NaN	NaN	59.898	NaN
P53396	819	P53396	P53396	ATP-citrate synthase	ACLY	LVANGVIVPAQEVPPPTVPMDYSWARELGLI	2129	P	4	2725		LVANGVIVPA	Q	E	V	P	P	P	T	V	P	M	D	YSWARELGLI	0.927552	2.92e-12	65.508	61.603	63.727	4.3153	183550000	NaN	0.927552	0.895735	NaN	63.727	65.508
P53396	239	P53396	P53396	ATP-citrate synthase	ACLY	TADYICKVKWGDIEFPPPFGREAYPEEAYIA	2132	P	4	2725		TADYICKVKW	G	D	I	E	F	P	P	P	F	G	R	EAYPEEAYIA	0.788025	0.00105244	55.413	49.869	55.413	-1.8657	100730000	0.788025	NaN	NaN	55.413	NaN	NaN
P53597	170	P53597	P53597	Succinyl-CoA ligase [ADP/GDP-forming] subunit alpha, mitochondrial	SUCLG1	VKHKLLRQEKTRLIGPNCPGVINPGECKIGI	2133	P	2	2729		VKHKLLRQEK	T	R	L	I	G	P	N	C	P	G	V	INPGECKIGI	0.95404	0.00277447	103.75	87.498	96.745	-0.3079	135750000	0.900358	0.95404	0.898407	103.75	96.745	83.314
P53621	218	P53621	P53621	Coatomer subunit alpha;Xenin;Proxenin	COPA	GHDRGVNWAAFHPTMPLIVSGADDRQVKIWR	2138	P	3	2734		GHDRGVNWAA	F	H	P	T	M	P	L	I	V	S	G	ADDRQVKIWR	1	0.000602705	63.573	55.58	52.853	0.92904	206860000	1	0.5	NaN	52.853	63.573	NaN
P53621	803	P53621	P53621	Coatomer subunit alpha;Xenin;Proxenin	COPA	IDPNAKLLQPPAPIMPLDTNWPLLTVSKGFF	2139	P	3	2734		IDPNAKLLQP	P	A	P	I	M	P	L	D	T	N	W	PLLTVSKGFF	0.833248	0.00216321	61.222	53.51	61.222	-1.8203	23044000	0.833248	NaN	NaN	61.222	NaN	NaN
P53701	81	P53701	P53701	Cytochrome c-type heme lyase	HCCS	CPIRGTAAENKENLDPSNLMPPPNQTPAPDQ	2141	P	4	2741		CPIRGTAAEN	K	E	N	L	D	P	S	N	L	M	P	PPNQTPAPDQ	0.824827	0.000518872	47.006	45.344	47.006	0.92828	16505000	NaN	0.824827	NaN	NaN	47.006	NaN
P53701	121	P53701	P53701	Cytochrome c-type heme lyase	HCCS	ESSIPRADSEKKWVYPSEQMFWNAMLKKGWK	2142	P	2	2741		ESSIPRADSE	K	K	W	V	Y	P	S	E	Q	M	F	WNAMLKKGWK	1	0.00999453	59.426	35.821	59.426	-1.3951	0	NaN	1	NaN	NaN	59.426	NaN
P53814	453	P53814	P53814	Smoothelin	SMTN	EEPGAPLPVAVGTAEPGGSMKTTFTIEIKDG	2144	P	2	2749		EEPGAPLPVA	V	G	T	A	E	P	G	G	S	M	K	TTFTIEIKDG	0.999997	0.0212422	96.247	82.819	96.247	4.325	0	NaN	NaN	0.999997	NaN	NaN	96.247
P53990	176	P53990	P53990	IST1 homolog	IST1	LVERYLIEIAKNYNVPYEPDSVVMAEAPPGV	2145	P	3	2751		LVERYLIEIA	K	N	Y	N	V	P	Y	E	P	D	S	VVMAEAPPGV	0.527357	0.0279518	42.865	37.809	42.865	1.0093	22156000	NaN	0.527357	NaN	NaN	42.865	NaN
P53999	107	P53999	P53999	Activated RNA polymerase II transcriptional coactivator p15	SUB1	PEGEMKPGRKGISLNPEQWSQLKEQISDIDD	2147	P	2	2753		PEGEMKPGRK	G	I	S	L	N	P	E	Q	W	S	Q	LKEQISDIDD	1	0.0298956	87.02	68.187	87.02	1.3162	0	1	NaN	NaN	87.02	NaN	NaN
P53999	92	P53999	P53999	Activated RNA polymerase II transcriptional coactivator p15	SUB1	FKGKVLIDIREYWMDPEGEMKPGRKGISLNP	2148	P	4	2753		FKGKVLIDIR	E	Y	W	M	D	P	E	G	E	M	K	PGRKGISLNP	0.999926	0.0010546	88.755	80.801	74.662	-0.16246	9485100000	0.999904	0.999926	0.99965	66.827	88.755	74.662
P54098	116	P54098	P54098	DNA polymerase subunit gamma-1	POLG	RRSVEHLQKHGLWGQPAVPLPDVELRLPPLY	2149	P	5	2754		RRSVEHLQKH	G	L	W	G	Q	P	A	V	P	L	P	DVELRLPPLY	0.918406	0.00066944	50.704	46.833	50.704	-4.389	22607000	NaN	NaN	0.918406	NaN	NaN	50.704
P54136	257	P54136	P54136	Arginine--tRNA ligase, cytoplasmic	RARS	GTQFGMLIAHLQDKFPDYLTVSPPIGDLQVF	2150	P	5	2757		GTQFGMLIAH	L	Q	D	K	F	P	D	Y	L	T	V	SPPIGDLQVF	0.95992	0.00614973	42.782	39.406	42.782	-3.5958	146710000	NaN	NaN	0.95992	NaN	NaN	42.782
P54198	662	P54198	P54198	Protein HIRA	HIRA	RKDSRLMPVSLSVQSPAALTAEKEAMCLSAP	2151	P	4	2758		RKDSRLMPVS	L	S	V	Q	S	P	A	A	L	T	A	EKEAMCLSAP	0.963834	8.11e-10	66.933	66.933	41.764	0.021313	94350000	NaN	0.963834	NaN	NaN	66.933	NaN
P54198	875	P54198	P54198	Protein HIRA	HIRA	KQDSLAQCADFRSSLPSQDAMLCSGPLAIIQ	2153	P	2	2758		KQDSLAQCAD	F	R	S	S	L	P	S	Q	D	A	M	LCSGPLAIIQ	0.999951	0.000183236	85.42	72.002	85.42	-1.1645	112350000	NaN	0.999951	0.999593	NaN	85.42	61.181
P54274	278	P54274	P54274	Telomeric repeat-binding factor 1	TERF1	VVESKRTRTITSQDKPSGNDVEMETEANLDT	2154	P	3	2762		VVESKRTRTI	T	S	Q	D	K	P	S	G	N	D	V	EMETEANLDT	1	0.00530446	66.383	59.66	66.383	-0.13219	109940000	1	NaN	NaN	66.383	NaN	NaN
P54652	6	P54652	P54652	Heat shock-related 70 kDa protein 2	HSPA2	__________MSARGPAIGIDLGTTYSCVGV	2159	P	3	2773		__________	M	S	A	R	G	P	A	I	G	I	D	LGTTYSCVGV	1	2.1e-06	96.487	81.873	46.702	1.2787	426220000	1	1	1	41.711	96.487	49.188
P54687	359	P54687	P54687	Branched-chain-amino-acid aminotransferase, cytosolic	BCAT1	LYKGETIHIPTMENGPKLASRILSKLTDIQY	2160	P	3	2774		LYKGETIHIP	T	M	E	N	G	P	K	L	A	S	R	ILSKLTDIQY	0.988892	0.0106522	66.533	39.563	66.533	-2.0063	31148000	NaN	NaN	0.988892	NaN	NaN	66.533
P54709	23	P54709	P54709	Sodium/potassium-transporting ATPase subunit beta-3	ATP1B3	SLNQSLAEWKLFIYNPTTGEFLGRTAKSWGL	2162	P	2	2775		SLNQSLAEWK	L	F	I	Y	N	P	T	T	G	E	F	LGRTAKSWGL	1	0.00943128	99.069	82.19	99.069	-1.3914	0	NaN	NaN	1	NaN	NaN	99.069
P54725	107	P54725	P54725	UV excision repair protein RAD23 homolog A	RAD23A	SPTAAPESSTSFPPAPTSGMSHPPPAAREDK	2163	P	4	2776		SPTAAPESST	S	F	P	P	A	P	T	S	G	M	S	HPPPAAREDK	0.867307	2.9e-12	95.26	91.5	90.724	-0.10333	1837000000	0.867307	0.727464	0.813015	95.26	91.295	90.672
P54886	648	P54886	P54886	Delta-1-pyrroline-5-carboxylate synthase;Glutamate 5-kinase;Gamma-glutamyl phosphate reductase	ALDH18A1	IIDMLRVEQVKIHAGPKFASYLTFSPSEVKS	2168	P	4	2786		IIDMLRVEQV	K	I	H	A	G	P	K	F	A	S	Y	LTFSPSEVKS	1	0.000177208	78.324	66.358	78.324	0.13323	374640000	NaN	1	NaN	NaN	78.324	NaN
P54886	361	P54886	P54886	Delta-1-pyrroline-5-carboxylate synthase;Glutamate 5-kinase;Gamma-glutamyl phosphate reductase	ALDH18A1	GKKVGTFFSEVKPAGPTVEQQGEMARSGGRM	2169	P	2	2786		GKKVGTFFSE	V	K	P	A	G	P	T	V	E	Q	Q	GEMARSGGRM	0.997844	1.84e-05	105.14	93.619	105.14	-0.71104	106000000	NaN	NaN	0.997844	NaN	NaN	105.14
P55036	45	P55036	P55036	26S proteasome non-ATPase regulatory subunit 4	PSMD4	QDAVNIVCHSKTRSNPENNVGLITLANDCEV	2172	P	3	2790		QDAVNIVCHS	K	T	R	S	N	P	E	N	N	V	G	LITLANDCEV	0.999938	0.0049206	52.685	47.025	52.685	1.5465	9336600	0.999938	NaN	NaN	52.685	NaN	NaN
P55060	940	P55060	P55060	Exportin-2	CSE1L	KIHLAQSLHKLSTACPGRVPSMVSTSLNAEA	2174	P	4	2793		KIHLAQSLHK	L	S	T	A	C	P	G	R	V	P	S	MVSTSLNAEA	0.547755	2.75e-09	63.426	59.193	63.426	-0.062295	54685000	NaN	0	0.547755	NaN	NaN	63.426
P55060	612	P55060	P55060	Exportin-2	CSE1L	QLTQKLLAVSKNPSKPHFNHYMFEAICLSIR	2177	P	4	2793		QLTQKLLAVS	K	N	P	S	K	P	H	F	N	H	Y	MFEAICLSIR	0.844897	0.00128152	66.874	53.816	66.874	0.013327	51048000	NaN	0.844897	NaN	NaN	66.874	NaN
P55072	472	P55072	P55072	Transitional endoplasmic reticulum ATPase	VCP	SQSNPSALRETVVEVPQVTWEDIGGLEDVKR	2178	P	2	2795		SQSNPSALRE	T	V	V	E	V	P	Q	V	T	W	E	DIGGLEDVKR	1	0.00212829	79.633	46.429	79.633	-3.1897	0	1	NaN	NaN	79.633	NaN	NaN
P55072	545	P55072	P55072	Transitional endoplasmic reticulum ATPase	VCP	AIANECQANFISIKGPELLTMWFGESEANVR	2179	P	2	2795		AIANECQANF	I	S	I	K	G	P	E	L	L	T	M	WFGESEANVR	1	0.0103059	69.815	55.37	69.815	0.03574	177790000	NaN	1	1	NaN	56.087	69.815
P55072	118	P55072	P55072	Transitional endoplasmic reticulum ATPase	VCP	QPCPDVKYGKRIHVLPIDDTVEGITGNLFEV	2180	P	5	2795		QPCPDVKYGK	R	I	H	V	L	P	I	D	D	T	V	EGITGNLFEV	0.999956	0.0101508	46.772	42.579	46.772	-4.1914	28365000	NaN	NaN	0.999956	NaN	NaN	46.772
P55072	104	P55072	P55072	Transitional endoplasmic reticulum ATPase	VCP	RNNLRVRLGDVISIQPCPDVKYGKRIHVLPI	2181	P	2	2795		RNNLRVRLGD	V	I	S	I	Q	P	C	P	D	V	K	YGKRIHVLPI	0.97798	0.0159875	140.49	114.55	110.84	-0.47189	161060000	0.871518	0.97798	NaN	140.49	110.84	NaN
P55196	33	P55196	P55196	Afadin	MLLT4	HHWNANRLDLFEISQPTEDLEFHGVMRFYFQ	2185	P	4	2801		HHWNANRLDL	F	E	I	S	Q	P	T	E	D	L	E	FHGVMRFYFQ	1	0.00349973	40.544	31.998	40.544	-3.8651	46400000	NaN	NaN	1	NaN	NaN	40.544
P55196	443	P55196	P55196	Afadin	MLLT4	VGTEKLDDNSIQLFGPGIQPHHCDLTNMDGV	2186	P	4	2801		VGTEKLDDNS	I	Q	L	F	G	P	G	I	Q	P	H	HCDLTNMDGV	0.743284	4.57e-07	68.291	66.336	63.657	0.11738	222110000	NaN	NaN	0.743284	NaN	NaN	68.291
P55196	1244	P55196	P55196	Afadin	MLLT4	EYFTFPASKSQDRMAPPQNQWPNYEEKPHMH	2188	P	5	2801		EYFTFPASKS	Q	D	R	M	A	P	P	Q	N	Q	W	PNYEEKPHMH	0.97671	8.34e-05	77.984	77.984	77.984	-0.97868	14918000	NaN	NaN	0.97671	NaN	NaN	77.984
P55196	1245	P55196	P55196	Afadin	MLLT4	YFTFPASKSQDRMAPPQNQWPNYEEKPHMHT	2189	P	5	2801		YFTFPASKSQ	D	R	M	A	P	P	Q	N	Q	W	P	NYEEKPHMHT	0.972027	8.34e-05	77.984	77.984	77.984	-0.97868	14918000	NaN	NaN	0.972027	NaN	NaN	77.984
P55196	1464	P55196	P55196	Afadin	MLLT4	LNPAPFSPLTAQQMKPEKPSTLQRPQETVIR	2191	P	3	2801		LNPAPFSPLT	A	Q	Q	M	K	P	E	K	P	S	T	LQRPQETVIR	0.997343	6.01e-05	90.316	82.694	81.967	1.8261	75331000	NaN	0.997343	0.993155	NaN	81.967	90.316
P55209	220	P55209	P55209	Nucleosome assembly protein 1-like 1	NAP1L1	DAGQPMSFVLEFHFEPNEYFTNEVLTKTYRM	2193	P	4	2806		DAGQPMSFVL	E	F	H	F	E	P	N	E	Y	F	T	NEVLTKTYRM	0.580606	0.000202951	58.477	56.931	50.857	0.34888	359500000	0.545296	0.551865	0.580606	58.477	57.688	50.857
P55263	136	P55263	P55263	Adenosine kinase	ADK	AEAHVDAHYYEQNEQPTGTCAACITGDNRSL	2194	P	4	2810		AEAHVDAHYY	E	Q	N	E	Q	P	T	G	T	C	A	ACITGDNRSL	1	1.51e-05	85	84.813	54.683	-1.8303	39428000	1	1	NaN	85	54.683	NaN
P55265	395	P55265	P55265	Double-stranded RNA-specific adenosine deaminase	ADAR	IPETKRNAEFLTCNIPTSNASNNMVTTEKVE	2196	P	3	2811		IPETKRNAEF	L	T	C	N	I	P	T	S	N	A	S	NNMVTTEKVE	1	0.000952895	56.72	53.667	56.72	0.28805	44606000	1	0.976268	NaN	56.72	44.674	NaN
P55786;A6NEC2	207;207	P55786	P55786	Puromycin-sensitive aminopeptidase;Puromycin-sensitive aminopeptidase-like protein	NPEPPS;NPEPPSL1	DEPAIKATFDISLVVPKDRVALSNMNVIDRK	2198	P	4	2821		DEPAIKATFD	I	S	L	V	V	P	K	D	R	V	A	LSNMNVIDRK	1	0.00355117	58.627	56.22	58.627	-0.1367	30752000	NaN	1	NaN	NaN	58.627	NaN
P55786	694	P55786	P55786	Puromycin-sensitive aminopeptidase	NPEPPS	VKDVFSPIGERLGWDPKPGEGHLDALLRGLV	2200	P	4	2821		VKDVFSPIGE	R	L	G	W	D	P	K	P	G	E	G	HLDALLRGLV	0.978887	0.0194201	49.993	32.915	41.86	0.45057	53100000	0.898672	0.978887	NaN	49.993	48.053	NaN
P55786	489	P55786	P55786	Puromycin-sensitive aminopeptidase	NPEPPS	ATEDLWESLENASGKPIAAVMNTWTKQMGFP	2201	P	2	2821		ATEDLWESLE	N	A	S	G	K	P	I	A	A	V	M	NTWTKQMGFP	1	0.0036107	78.902	69.496	78.902	-2.8177	0	NaN	NaN	1	NaN	NaN	78.902
P55789	123	P55789	P55789	FAD-linked sulfhydryl oxidase ALR	GFER	AVLHTLAAYYPDLPTPEQQQDMAQFIHLFSK	2202	P	5	2822		AVLHTLAAYY	P	D	L	P	T	P	E	Q	Q	Q	D	MAQFIHLFSK	0.871602	2.98e-07	63.516	57.227	63.516	-0.35697	15885000	NaN	NaN	0.871602	NaN	NaN	63.516
P55795	102	P55795	P55795	Heterogeneous nuclear ribonucleoprotein H2	HNRNPH2	KSNSVEMDWVLKHTGPNSPDTANDGFVRLRG	2205	P	4	2823		KSNSVEMDWV	L	K	H	T	G	P	N	S	P	D	T	ANDGFVRLRG	0.955296	0.000269669	68.361	61.712	68.361	0.32987	95762000	NaN	0.955296	NaN	NaN	68.361	NaN
P55884	474	P55884	P55884	Eukaryotic translation initiation factor 3 subunit B	EIF3B	KKSLKISGIKDFSWSPGGNIIAFWVPEDKDI	2206	P	4	2826		KKSLKISGIK	D	F	S	W	S	P	G	G	N	I	I	AFWVPEDKDI	0.999993	0.000126858	94.006	83.201	63.803	-2.7796	214650000	0.952507	0.996399	0.999993	94.006	75.275	63.803
P55884	484	P55884	P55884	Eukaryotic translation initiation factor 3 subunit B	EIF3B	DFSWSPGGNIIAFWVPEDKDIPARVTLMQLP	2207	P	3	2826		DFSWSPGGNI	I	A	F	W	V	P	E	D	K	D	I	PARVTLMQLP	0.999887	0.000387893	94.006	83.201	94.006	1.1075	914600000	0.999887	0.999645	0.999673	94.006	75.275	52.92
P55884	490	P55884	P55884	Eukaryotic translation initiation factor 3 subunit B	EIF3B	GGNIIAFWVPEDKDIPARVTLMQLPTRQEIR	2208	P	4	2826		GGNIIAFWVP	E	D	K	D	I	P	A	R	V	T	L	MQLPTRQEIR	0.948669	0.00538078	52.92	35.943	52.92	0.148	741640000	0.58919	NaN	0.948669	50.492	NaN	52.92
P55884	618	P55884	P55884	Eukaryotic translation initiation factor 3 subunit B	EIF3B	IKMFDKQQANTIFWSPQGQFVVLAGLRSMNG	2209	P	3	2826		IKMFDKQQAN	T	I	F	W	S	P	Q	G	Q	F	V	VLAGLRSMNG	1	0.0294089	42.041	35.392	42.041	0.89767	31065000	NaN	1	1	NaN	42.041	42.041
P55884	80	P55884	P55884	Eukaryotic translation initiation factor 3 subunit B	EIF3B	EVRTEPAAEAEAASGPSESPSPPAAEELPGS	2211	P	4	2826		EVRTEPAAEA	E	A	A	S	G	P	S	E	S	P	S	PPAAEELPGS	0.600417	2.9e-05	41.425	41.247	41.425	-0.80015	102140000	0.600417	NaN	NaN	41.425	NaN	NaN
P55884	84	P55884	P55884	Eukaryotic translation initiation factor 3 subunit B	EIF3B	EPAAEAEAASGPSESPSPPAAEELPGSHAEP	2212	P	4	2826		EPAAEAEAAS	G	P	S	E	S	P	S	P	P	A	A	EELPGSHAEP	0.600417	2.9e-05	41.425	41.247	41.425	-0.80015	102140000	0.600417	NaN	NaN	41.425	NaN	NaN
P55884	86	P55884	P55884	Eukaryotic translation initiation factor 3 subunit B	EIF3B	AAEAEAASGPSESPSPPAAEELPGSHAEPPV	2213	P	4	2826		AAEAEAASGP	S	E	S	P	S	P	P	A	A	E	E	LPGSHAEPPV	0.600417	2.9e-05	41.425	41.247	41.425	-0.80015	102140000	0.600417	NaN	NaN	41.425	NaN	NaN
P55884	87	P55884	P55884	Eukaryotic translation initiation factor 3 subunit B	EIF3B	AEAEAASGPSESPSPPAAEELPGSHAEPPVP	2214	P	4	2826		AEAEAASGPS	E	S	P	S	P	P	A	A	E	E	L	PGSHAEPPVP	0.600417	2.9e-05	41.425	41.247	41.425	-0.80015	102140000	0.600417	NaN	NaN	41.425	NaN	NaN
P55884	93	P55884	P55884	Eukaryotic translation initiation factor 3 subunit B	EIF3B	SGPSESPSPPAAEELPGSHAEPPVPAQGEAP	2215	P	4	2826		SGPSESPSPP	A	A	E	E	L	P	G	S	H	A	E	PPVPAQGEAP	0.713449	2.9e-05	41.425	41.247	41.425	-0.80015	102140000	0.713449	NaN	NaN	41.425	NaN	NaN
P55884	99	P55884	P55884	Eukaryotic translation initiation factor 3 subunit B	EIF3B	PSPPAAEELPGSHAEPPVPAQGEAPGEQARD	2216	P	4	2826		PSPPAAEELP	G	S	H	A	E	P	P	V	P	A	Q	GEAPGEQARD	0.693121	2.9e-05	41.425	41.247	41.425	-0.80015	102140000	0.693121	NaN	NaN	41.425	NaN	NaN
P55884	100	P55884	P55884	Eukaryotic translation initiation factor 3 subunit B	EIF3B	SPPAAEELPGSHAEPPVPAQGEAPGEQARDE	2217	P	4	2826		SPPAAEELPG	S	H	A	E	P	P	V	P	A	Q	G	EAPGEQARDE	0.693121	2.9e-05	41.425	41.247	41.425	-0.80015	102140000	0.693121	NaN	NaN	41.425	NaN	NaN
P55884	401	P55884	P55884	Eukaryotic translation initiation factor 3 subunit B	EIF3B	RYLVTFSPLMDTQDDPQAIIIWDILTGHKKR	2219	P	5	2826		RYLVTFSPLM	D	T	Q	D	D	P	Q	A	I	I	I	WDILTGHKKR	1	0.00127019	45.901	43.987	45.901	0.14342	164830000	0.529333	NaN	1	44.811	NaN	45.901
P56134	8	P56134	P56134	ATP synthase subunit f, mitochondrial	ATP5J2	________MASVGECPAPVPVKDKKLLEVKL	2220	P	2	2829		________MA	S	V	G	E	C	P	A	P	V	P	V	KDKKLLEVKL	1	0.0028386	78.655	60.387	42.743	2.2906	137550000	0.968545	1	0.967318	78.655	42.743	75.509
P56134	10	P56134	P56134	ATP synthase subunit f, mitochondrial	ATP5J2	______MASVGECPAPVPVKDKKLLEVKLGE	2221	P	2	2829		______MASV	G	E	C	P	A	P	V	P	V	K	D	KKLLEVKLGE	1	0.0235674	46.891	10.198	42.743	2.2906	35056000	0.333333	1	NaN	46.891	42.743	NaN
P56134	12	P56134	P56134	ATP synthase subunit f, mitochondrial	ATP5J2	____MASVGECPAPVPVKDKKLLEVKLGELP	2222	P	2	2829		____MASVGE	C	P	A	P	V	P	V	K	D	K	K	LLEVKLGELP	1	0.0235674	46.891	10.198	42.743	2.2906	35056000	0.333333	1	NaN	46.891	42.743	NaN
P56192	35	P56192	P56192	Methionine--tRNA ligase, cytoplasmic	MARS	GRARGRAEVLISTVGPEDCVVPFLTRPKVPV	2224	P	4	2835		GRARGRAEVL	I	S	T	V	G	P	E	D	C	V	V	PFLTRPKVPV	0.978384	0.00702133	51.857	47.875	51.857	-0.011067	47720000	NaN	0.937314	0.978384	NaN	46.307	51.857
P56192	839	P56192	P56192	Methionine--tRNA ligase, cytoplasmic	MARS	TSPKPAVVETVTTAKPQQIQALMDEVTKQGN	2225	P	3	2835		TSPKPAVVET	V	T	T	A	K	P	Q	Q	I	Q	A	LMDEVTKQGN	1	5.42e-05	87.772	84.573	87.772	-0.26796	163510000	1	1	NaN	74.062	87.772	NaN
P56192	442	P56192	P56192	Methionine--tRNA ligase, cytoplasmic	MARS	AVELKKPQCKVCRSCPVVQSSQHLFLDLPKL	2226	P	3	2835		AVELKKPQCK	V	C	R	S	C	P	V	V	Q	S	S	QHLFLDLPKL	1	0.00095615	82.707	76.743	82.707	1.1783	32637000	1	NaN	NaN	82.707	NaN	NaN
P56270	6	P56270	P56270	Myc-associated zinc finger protein	MAZ	__________MFPVFPCTLLAPPFPVLGLDS	2227	P	3	2838		__________	M	F	P	V	F	P	C	T	L	L	A	PPFPVLGLDS	0.885526	0.0078986	42.908	38.831	42.908	1.4426	6653600	NaN	0.885526	NaN	NaN	42.908	NaN
P56524	924	P56524	P56524	Histone deacetylase 4	HDAC4	AAFRTVVMPIASEFAPDVVLVSSGFDAVEGH	2229	P	4	2845		AAFRTVVMPI	A	S	E	F	A	P	D	V	V	L	V	SSGFDAVEGH	0.544216	0.000194069	41.868	36.069	41.868	-2.6138	44717000	NaN	0.544216	NaN	NaN	41.868	NaN
P56589	301	P56589	P56589	Peroxisomal biogenesis factor 3	PEX3	RGFSRLLDNMAEFFRPTEQDLQHGNSMNSLS	2231	P	4	2849		RGFSRLLDNM	A	E	F	F	R	P	T	E	Q	D	L	QHGNSMNSLS	0.999932	2.3e-05	85.097	73.97	55.101	0.30349	105880000	NaN	NaN	0.999932	NaN	NaN	85.097
P57682	50	P57682	P57682	Krueppel-like factor 3	KLF3	GVIYSTPLPEKFFQTPEGLSHGIQMEPVDLT	2232	P	3	2863		GVIYSTPLPE	K	F	F	Q	T	P	E	G	L	S	H	GIQMEPVDLT	0.979395	0.00610443	51.175	43.815	51.175	-0.0018598	9785400	0.979395	NaN	NaN	51.175	NaN	NaN
P58107	376	P58107	P58107	Epiplakin	EPPK1	QAVTGHHDPFSGSQIPLFQAMKKGLVDRPLA	2233	P	4	2872		QAVTGHHDPF	S	G	S	Q	I	P	L	F	Q	A	M	KKGLVDRPLA	0.99756	5.68e-08	79.19	71.814	79.19	-0.73033	91346000	0.994214	0.99756	NaN	52.586	79.19	NaN
P58107	2582	P58107	P58107	Epiplakin	EPPK1	LTRRLTAIIEEAEEAPGARPQLQDAWRGPRE	2234	P	4	2872		LTRRLTAIIE	E	A	E	E	A	P	G	A	R	P	Q	LQDAWRGPRE	1	6.37e-07	103.26	96.599	65.901	0.56231	102690000	1	1	NaN	65.901	103.26	NaN
P58107	2586	P58107	P58107	Epiplakin	EPPK1	LTAIIEEAEEAPGARPQLQDAWRGPREPGPA	2235	P	4	2872		LTAIIEEAEE	A	P	G	A	R	P	Q	L	Q	D	A	WRGPREPGPA	1	6.37e-07	103.26	96.599	65.901	0.56231	102690000	1	1	NaN	65.901	103.26	NaN
P58107	913	P58107	P58107	Epiplakin	EPPK1	IDQQLLDQVLAGTISPEALLLMDGVRRYLCG	2237	P	5	2872		IDQQLLDQVL	A	G	T	I	S	P	E	A	L	L	L	MDGVRRYLCG	1	1.76e-17	130.01	123.36	130.01	-0.33211	78638000	1	NaN	NaN	130.01	NaN	NaN
P58546	64	P58546	P58546	Myotrophin	MTPN	EILEFLLLKGADINAPDKHHITPLLSAVYEG	2238	P	4	2877		EILEFLLLKG	A	D	I	N	A	P	D	K	H	H	I	TPLLSAVYEG	0.99979	4.22e-05	112.11	100.48	86.869	0.37719	2044300000	0.99979	0.999739	0.998631	86.869	112.11	99.614
P59045	43	P59045	P59045	NACHT, LRR and PYD domains-containing protein 11	NLRP11	KYLARKILDFKLPQFPLIQMTKEELANVLPI	2239	P	2	2879		KYLARKILDF	K	L	P	Q	F	P	L	I	Q	M	T	KEELANVLPI	0.98977	0.0285055	76.1	47.144	65.224	-3.4257	259120000	NaN	NaN	0.98977	NaN	NaN	76.1
P60174	44	P60174	P60174	Triosephosphate isomerase	TPI1	LNAAKVPADTEVVCAPPTAYIDFARQKLDPK	2240	P	3	2889		LNAAKVPADT	E	V	V	C	A	P	P	T	A	Y	I	DFARQKLDPK	0.964561	1.43e-10	158.58	145.44	73.11	-0.11809	1291800000	0.964561	0.957365	0.932186	158.58	131.06	94.023
P60174	167	P60174	P60174	Triosephosphate isomerase	TPI1	ADNVKDWSKVVLAYEPVWAIGTGKTATPQQA	2242	P	2	2889		ADNVKDWSKV	V	L	A	Y	E	P	V	W	A	I	G	TGKTATPQQA	1	0.00743698	134.75	119.48	110.86	-2.2044	879650000	1	1	1	100.72	134.75	115.18
P60228	240	P60228	P60228	Eukaryotic translation initiation factor 3 subunit E	EIF3E	HPKGRDNIIDLFLYQPQYLNAIQTMCPHILR	2243	P	3	2890		HPKGRDNIID	L	F	L	Y	Q	P	Q	Y	L	N	A	IQTMCPHILR	0.90154	0.0115363	52.685	46.965	52.685	1.7827	21504000	0.90154	NaN	NaN	52.685	NaN	NaN
P60484	38	P60484	P60484	Phosphatidylinositol 3,4,5-trisphosphate 3-phosphatase and dual-specificity protein phosphatase PTEN	PTEN	LDLTYIYPNIIAMGFPAERLEGVYRNNIDDV	2244	P	4	2892		LDLTYIYPNI	I	A	M	G	F	P	A	E	R	L	E	GVYRNNIDDV	0.997856	5.64e-05	81.519	77.075	81.519	-1.6428	99172000	0.997856	NaN	NaN	81.519	NaN	NaN
P60602	13	P60602	P60602	Reactive oxygen species modulator 1	ROMO1	___MPVAVGPYGQSQPSCFDRVKMGFVMGCA	2245	P	3	2895		___MPVAVGP	Y	G	Q	S	Q	P	S	C	F	D	R	VKMGFVMGCA	0.999799	0.021082	66.673	61.671	66.673	-0.33165	40162000	0.999799	NaN	NaN	66.673	NaN	NaN
P60660	55	P60660	P60660	Myosin light polypeptide 6	MYL6	GQNPTNAEVLKVLGNPKSDEMNVKVLDFEHF	2247	P	5	2897		GQNPTNAEVL	K	V	L	G	N	P	K	S	D	E	M	NVKVLDFEHF	1	0.0326591	42.347	42.347	42.347	-0.47286	88811000	NaN	NaN	1	NaN	NaN	42.347
P60709;P63261	258;258	P60709;P63261	P63261	Actin, cytoplasmic 1;Actin, cytoplasmic 1, N-terminally processed;Actin, cytoplasmic 2;Actin, cytoplasmic 2, N-terminally processed	ACTB;ACTG1	PDGQVITIGNERFRCPEALFQPSFLGMESCG	2248	P	4	2898;3061		PDGQVITIGN	E	R	F	R	C	P	E	A	L	F	Q	PSFLGMESCG	0.999873	1.92e-05	65.69	61.95	65.284	-0.55198	1621200000	0.999873	0.999418	0.997978	65.69	46.149	40.986
P60709;P63261	264;264	P60709;P63261	P63261	Actin, cytoplasmic 1;Actin, cytoplasmic 1, N-terminally processed;Actin, cytoplasmic 2;Actin, cytoplasmic 2, N-terminally processed	ACTB;ACTG1	TIGNERFRCPEALFQPSFLGMESCGIHETTF	2249	P	3	2898;3061		TIGNERFRCP	E	A	L	F	Q	P	S	F	L	G	M	ESCGIHETTF	0.999996	1.08e-05	84.035	79.08	73.805	-0.68066	1975400000	0.999996	0.999972	0	73.805	84.035	NaN
P60709;P63261	307;307	P60709;P63261	P63261	Actin, cytoplasmic 1;Actin, cytoplasmic 1, N-terminally processed;Actin, cytoplasmic 2;Actin, cytoplasmic 2, N-terminally processed	ACTB;ACTG1	DLYANTVLSGGTTMYPGIADRMQKEITALAP	2250	P	2	2898;3061		DLYANTVLSG	G	T	T	M	Y	P	G	I	A	D	R	MQKEITALAP	1	2.24e-22	178.14	166.87	178.14	0.033198	1434300000	NaN	1	1	NaN	56.766	178.14
P60709;P63261	70;70	P60709;P63261	P63261	Actin, cytoplasmic 1;Actin, cytoplasmic 1, N-terminally processed;Actin, cytoplasmic 2;Actin, cytoplasmic 2, N-terminally processed	ACTB;ACTG1	GDEAQSKRGILTLKYPIEHGIVTNWDDMEKI	2252	P	5	2898;3061		GDEAQSKRGI	L	T	L	K	Y	P	I	E	H	G	I	VTNWDDMEKI	1	0.0047261	45.836	22.867	45.836	2.4095	31425000	1	NaN	NaN	45.836	NaN	NaN
P60709;P63261	98;98	P60709;P63261	P63261	Actin, cytoplasmic 1;Actin, cytoplasmic 1, N-terminally processed;Actin, cytoplasmic 2;Actin, cytoplasmic 2, N-terminally processed	ACTB;ACTG1	EKIWHHTFYNELRVAPEEHPVLLTEAPLNPK	2253	P	3	2898;3061		EKIWHHTFYN	E	L	R	V	A	P	E	E	H	P	V	LLTEAPLNPK	1	1.59e-07	127.41	116.66	127.41	0.70214	7769900000	0.999994	0.999998	1	77.211	63.901	127.41
P60709;P63261	102;102	P60709;P63261	P63261	Actin, cytoplasmic 1;Actin, cytoplasmic 1, N-terminally processed;Actin, cytoplasmic 2;Actin, cytoplasmic 2, N-terminally processed	ACTB;ACTG1	HHTFYNELRVAPEEHPVLLTEAPLNPKANRE	2254	P	3	2898;3061		HHTFYNELRV	A	P	E	E	H	P	V	L	L	T	E	APLNPKANRE	1	1.59e-07	127.41	116.66	127.41	0.70214	6410700000	0.999994	0.999998	1	58.722	63.901	127.41
P60709;P63261	164;164	P60709;P63261	P63261	Actin, cytoplasmic 1;Actin, cytoplasmic 1, N-terminally processed;Actin, cytoplasmic 2;Actin, cytoplasmic 2, N-terminally processed	ACTB;ACTG1	TGIVMDSGDGVTHTVPIYEGYALPHAILRLD	2256	P	4	2898;3061		TGIVMDSGDG	V	T	H	T	V	P	I	Y	E	G	Y	ALPHAILRLD	0.999999	2.27e-05	81.341	75.68	81.341	-0.90298	1765500000	0.999782	0.999999	0.999705	50.294	81.341	52.391
P60763	140	P60763	P60763	Ras-related C3 botulinum toxin substrate 3	RAC3	TIERLRDKKLAPITYPQGLAMAREIGSVKYL	2257	P	2	2899		TIERLRDKKL	A	P	I	T	Y	P	Q	G	L	A	M	AREIGSVKYL	0.999942	0.0327211	64.878	57.464	64.878	0.55934	0	0.999942	NaN	NaN	64.878	NaN	NaN
P60842	152	P60842	P60842	Eukaryotic initiation factor 4A-I	EIF4A1	GTNVRAEVQKLQMEAPHIIVGTPGRVFDMLN	2258	P	5	2900		GTNVRAEVQK	L	Q	M	E	A	P	H	I	I	V	G	TPGRVFDMLN	1	1.35e-08	119.54	105.67	42.106	0.043282	4533600000	0.998532	1	1	49.528	119.54	100.28
P60842	159	P60842	P60842	Eukaryotic initiation factor 4A-I	EIF4A1	VQKLQMEAPHIIVGTPGRVFDMLNRRYLSPK	2259	P	5	2900		VQKLQMEAPH	I	I	V	G	T	P	G	R	V	F	D	MLNRRYLSPK	1	1.2e-07	105.06	105.06	42.106	0.043282	1447900000	NaN	1	1	NaN	64.87	105.06
P60842	399	P60842	P60842	Eukaryotic initiation factor 4A-I	EIF4A1	LRDIETFYNTSIEEMPLNVADLI________	2260	P	3	2900		LRDIETFYNT	S	I	E	E	M	P	L	N	V	A	D	LI________	1	0.000137535	78.661	65.034	50.029	0.66373	1273600000	1	NaN	1	78.661	NaN	70.335
P60842	19	P60842	P60842	Eukaryotic initiation factor 4A-I	EIF4A1	SQDSRSRDNGPDGMEPEGVIESNWNEIVDSF	2262	P	3	2900		SQDSRSRDNG	P	D	G	M	E	P	E	G	V	I	E	SNWNEIVDSF	1	1.37e-06	60.18	56.296	50.942	-2.1122	145320000	1	0.78523	NaN	60.18	43.566	NaN
P60981	106	P60981	P60981	Destrin	DSTN	TKESRKEELMFFLWAPELAPLKSKMIYASSK	2264	P	2	2906		TKESRKEELM	F	F	L	W	A	P	E	L	A	P	L	KSKMIYASSK	1	0.000713715	92.295	72.691	92.295	0.74993	41524000	NaN	1	NaN	NaN	92.295	NaN
P60981	110	P60981	P60981	Destrin	DSTN	RKEELMFFLWAPELAPLKSKMIYASSKDAIK	2265	P	2	2906		RKEELMFFLW	A	P	E	L	A	P	L	K	S	K	M	IYASSKDAIK	1	0.000713715	92.295	72.691	92.295	0.74993	41524000	NaN	1	NaN	NaN	92.295	NaN
P60983	93	P60983	P60983	Glia maturation factor beta	GMFB	DDGRVSYPLCFIFSSPVGCKPEQQMMYAGSK	2266	P	4	2907		DDGRVSYPLC	F	I	F	S	S	P	V	G	C	K	P	EQQMMYAGSK	0.999974	0.000421388	53.569	53.569	53.569	-1.1656	10123000	NaN	0.999974	NaN	NaN	53.569	NaN
P60983	98	P60983	P60983	Glia maturation factor beta	GMFB	SYPLCFIFSSPVGCKPEQQMMYAGSKNKLVQ	2267	P	4	2907		SYPLCFIFSS	P	V	G	C	K	P	E	Q	Q	M	M	YAGSKNKLVQ	0.999974	0.000421388	53.569	53.569	53.569	-1.1656	99062000	NaN	0.999974	0.798703	NaN	53.569	47.487
P61011	353	P61011	P61011	Signal recognition particle 54 kDa protein	SRP54	NIMKMGPFSQILGMIPGFGTDFMSKGNEQES	2268	P	3	2910		NIMKMGPFSQ	I	L	G	M	I	P	G	F	G	T	D	FMSKGNEQES	0.999716	1.74e-05	65.581	65.581	42.59	-2.5052	64905000	NaN	0.999716	0.740397	NaN	42.59	65.581
P61024	62	P61024	P61024	Cyclin-dependent kinases regulatory subunit 1	CKS1B	GVQQSQGWVHYMIHEPEPHILLFRRPLPKKP	2269	P	4	2914		GVQQSQGWVH	Y	M	I	H	E	P	E	P	H	I	L	LFRRPLPKKP	1	0.000139362	66.501	60.841	56.95	1.0727	2039400000	1	1	NaN	56.625	66.501	NaN
P61024	64	P61024	P61024	Cyclin-dependent kinases regulatory subunit 1	CKS1B	QQSQGWVHYMIHEPEPHILLFRRPLPKKPKK	2270	P	4	2914		QQSQGWVHYM	I	H	E	P	E	P	H	I	L	L	F	RRPLPKKPKK	1	0.000139362	66.501	60.841	56.95	1.0727	2039400000	1	1	NaN	56.625	66.501	NaN
P61088	97	P61088	P61088	Ubiquitin-conjugating enzyme E2 N	UBE2N	KLGRICLDILKDKWSPALQIRTVLLSIQALL	2272	P	4	2920		KLGRICLDIL	K	D	K	W	S	P	A	L	Q	I	R	TVLLSIQALL	1	0.00659222	63.827	50.2	63.827	-0.78812	47503000	1	NaN	NaN	63.827	NaN	NaN
P61088	59	P61088	P61088	Ubiquitin-conjugating enzyme E2 N	UBE2N	DSPFEGGTFKLELFLPEEYPMAAPKVRFMTK	2273	P	3	2920		DSPFEGGTFK	L	E	L	F	L	P	E	E	Y	P	M	AAPKVRFMTK	0.621066	1.09e-09	127.35	119.22	127.35	1.6184	2962800000	0.621066	0.541797	0.583771	127.35	74.474	82.207
P61088	67	P61088	P61088	Ubiquitin-conjugating enzyme E2 N	UBE2N	FKLELFLPEEYPMAAPKVRFMTKIYHPNVDK	2274	P	4	2920		FKLELFLPEE	Y	P	M	A	A	P	K	V	R	F	M	TKIYHPNVDK	0.528907	0.000414971	47.784	45.956	47.784	-0.8155	1504700000	0	0.528907	0	NaN	47.784	NaN
P61158	6	P61158	P61158	Actin-related protein 3	ACTR3	__________MAGRLPACVVDCGTGYTKLGY	2276	P	2	2923		__________	M	A	G	R	L	P	A	C	V	V	D	CGTGYTKLGY	1	0.00178748	74.46	58.207	74.46	0.048955	36801000	1	NaN	NaN	74.46	NaN	NaN
P61158	70	P61158	P61158	Actin-related protein 3	ACTR3	VDDLDFFIGDEAIEKPTYATKWPIRHGIVED	2277	P	4	2923		VDDLDFFIGD	E	A	I	E	K	P	T	Y	A	T	K	WPIRHGIVED	1	0.000157212	105.16	96.43	72.302	-1.4082	411390000	1	1	1	69.639	105.16	72.302
P61158	77	P61158	P61158	Actin-related protein 3	ACTR3	IGDEAIEKPTYATKWPIRHGIVEDWDLMERF	2278	P	4	2923		IGDEAIEKPT	Y	A	T	K	W	P	I	R	H	G	I	VEDWDLMERF	1	0.000157212	105.16	96.43	72.302	-1.4082	411390000	1	1	1	69.639	105.16	72.302
P61160	116	P61160	P61160	Actin-related protein 2	ACTR2	DTRNCKILLTEPPMNPTKNREKIVEVMFETY	2279	P	2	2924		DTRNCKILLT	E	P	P	M	N	P	T	K	N	R	E	KIVEVMFETY	0.90194	0.0106951	140.16	126.05	132.01	0.49376	632880000	NaN	0.709503	0.90194	NaN	116.3	140.16
P61221	177	P61221	P61221	ATP-binding cassette sub-family E member 1	ABCE1	DDLKAIIKPQYVDQIPKAAKGTVGSILDRKD	2286	P	4	2930		DDLKAIIKPQ	Y	V	D	Q	I	P	K	A	A	K	G	TVGSILDRKD	0.865358	0.0120752	55.589	34.846	45.704	0.31308	340630000	NaN	0.865358	NaN	NaN	55.589	NaN
P61221	479	P61221	P61221	ATP-binding cassette sub-family E member 1	ABCE1	GGELQRVALALCLGKPADVYLIDEPSAYLDS	2287	P	3	2930		GGELQRVALA	L	C	L	G	K	P	A	D	V	Y	L	IDEPSAYLDS	0.997261	0.00584859	58.877	52.582	58.877	0.39171	24072000	NaN	0.997261	NaN	NaN	58.877	NaN
P61289	48	P61289	P61289	Proteasome activator complex subunit 3	PSME3	FFPKKLLELDSFLKEPILNIHDLTQIHSDMN	2290	P	5	2936		FFPKKLLELD	S	F	L	K	E	P	I	L	N	I	H	DLTQIHSDMN	0.996714	8.5e-07	51.166	49.827	44.869	-1.5863	132540000	0.996714	NaN	0.860752	44.869	NaN	51.166
P61326;Q96A72	78;80	P61326;Q96A72	Q96A72	Protein mago nashi homolog;Protein mago nashi homolog 2	MAGOH;MAGOHB	IIDDSEITKEDDALWPPPDRVGRQELEIVIG	2291	P	2	2938;6590		IIDDSEITKE	D	D	A	L	W	P	P	P	D	R	V	GRQELEIVIG	0.8917	3.78e-09	154.6	135.76	154.6	0.63242	2040600000	0.876714	0.8917	0.873878	89.668	154.6	66.644
P61326;Q96A72	79;81	P61326;Q96A72	Q96A72	Protein mago nashi homolog;Protein mago nashi homolog 2	MAGOH;MAGOHB	IDDSEITKEDDALWPPPDRVGRQELEIVIGD	2292	P	3	2938;6590		IDDSEITKED	D	A	L	W	P	P	P	D	R	V	G	RQELEIVIGD	0.897702	3.78e-09	154.6	135.76	55.763	0.75963	2040600000	0.897702	0.8917	0.873878	89.668	154.6	66.644
P61326;Q96A72	80;82	P61326;Q96A72	Q96A72	Protein mago nashi homolog;Protein mago nashi homolog 2	MAGOH;MAGOHB	DDSEITKEDDALWPPPDRVGRQELEIVIGDE	2293	P	2	2938;6590		DDSEITKEDD	A	L	W	P	P	P	D	R	V	G	R	QELEIVIGDE	0.785785	4.98e-05	124.62	111.21	124.62	0.086141	715250000	0.728377	0.785785	NaN	69.763	124.62	NaN
P61353	82	P61353	P61353	60S ribosomal protein L27	RPL27	KIKSFVKVYNYNHLMPTRYSVDIPLDKTVVN	2294	P	2	2939		KIKSFVKVYN	Y	N	H	L	M	P	T	R	Y	S	V	DIPLDKTVVN	1	0.000394243	113.93	103	113.93	-0.077982	1431400000	0.999974	1	0.988854	95.666	113.93	52.045
P61619	11	P61619	P61619	Protein transport protein Sec61 subunit alpha isoform 1	SEC61A1	_____MAIKFLEVIKPFCVILPEIQKPERKI	2295	P	4	2949		_____MAIKF	L	E	V	I	K	P	F	C	V	I	L	PEIQKPERKI	0.998473	0.00280259	66.874	52.712	65.25	0.19939	706880000	0.998473	0.989696	0.986923	65.25	66.874	55.383
P61758	41	P61758	P61758	Prefoldin subunit 3	VBP1	PEAVFVEDVDSFMKQPGNETADTVLKKLDEQ	2296	P	4	2950		PEAVFVEDVD	S	F	M	K	Q	P	G	N	E	T	A	DTVLKKLDEQ	0.999953	0.000162854	56.709	48.019	56.709	0.11106	341760000	0.999953	NaN	0.878758	56.709	NaN	44.05
P61764	239	P61764	P61764	Syntaxin-binding protein 1	STXBP1	DKARSQLLILDRGFDPSSPVLHELTFQAMSY	2297	P	4	2951		DKARSQLLIL	D	R	G	F	D	P	S	S	P	V	L	HELTFQAMSY	0.517543	9.41e-11	82.037	75.977	82.037	0.24145	170720000	0.517543	NaN	NaN	82.037	NaN	NaN
P61966	148	P61966	P61966	AP-1 complex subunit sigma-1A	AP1S1	KAIEQADLLQEEDESPRSVLEEMGLA_____	2298	P	2	2962		KAIEQADLLQ	E	E	D	E	S	P	R	S	V	L	E	EMGLA_____	1	2.51e-07	106.14	98.909	101.36	1.0466	48339000	NaN	1	1	NaN	96.414	106.14
P61981	167	P61981	P61981	14-3-3 protein gamma;14-3-3 protein gamma, N-terminally processed	YWHAG	KAYSEAHEISKEHMQPTHPIRLGLALNYSVF	2302	P	5	2966		KAYSEAHEIS	K	E	H	M	Q	P	T	H	P	I	R	LGLALNYSVF	0.841229	1.64e-05	71.974	60.458	71.974	-0.42762	69423000	NaN	0.841229	NaN	NaN	71.974	NaN
P62072	3	P62072	P62072	Mitochondrial import inner membrane translocase subunit Tim10	TIMM10	_____________MDPLRAQQLAAELEVEMM	2304	P	3	2969		__________	_	_	_	M	D	P	L	R	A	Q	Q	LAAELEVEMM	1	1.11e-05	103.29	98.597	103.29	0.18642	15486000	NaN	1	NaN	NaN	103.29	NaN
P62195	144	P62195	P62195	26S protease regulatory subunit 8	PSMC5	NKVDPLVSLMMVEKVPDSTYEMIGGLDKQIK	2306	P	3	2975		NKVDPLVSLM	M	V	E	K	V	P	D	S	T	Y	E	MIGGLDKQIK	0.998815	2.65e-05	93.376	93.376	93.376	-0.74982	120920000	NaN	0.998815	NaN	NaN	93.376	NaN
P62241	108	P62241	P62241	40S ribosomal protein S8	RPS8	TKTLVKNCIVLIDSTPYRQWYESHYALPLGR	2307	P	5	2976		TKTLVKNCIV	L	I	D	S	T	P	Y	R	Q	W	Y	ESHYALPLGR	1	8.25e-19	148.89	143.05	43.895	0.086303	8276000000	1	1	1	142.99	148.89	115.66
P62241	120	P62241	P62241	40S ribosomal protein S8	RPS8	DSTPYRQWYESHYALPLGRKKGAKLTPEEEE	2308	P	5	2976		DSTPYRQWYE	S	H	Y	A	L	P	L	G	R	K	K	GAKLTPEEEE	1	8.25e-19	148.89	143.05	43.895	0.086303	7975100000	1	1	1	142.99	148.89	115.66
P62244	95	P62244	P62244	40S ribosomal protein S15a	RPS15A	DVQLKDLEKWQNNLLPSRQFGFIVLTTSAGI	2309	P	4	2977		DVQLKDLEKW	Q	N	N	L	L	P	S	R	Q	F	G	FIVLTTSAGI	1	9.84e-14	161.86	149.96	87.411	-2.8905	352530000	1	1	1	161.86	87.411	56.719
P62263	71	P62263	P62263	40S ribosomal protein S14	RPS14	VTGGMKVKADRDESSPYAAMLAAQDVAQRCK	2313	P	2	2982		VTGGMKVKAD	R	D	E	S	S	P	Y	A	A	M	L	AAQDVAQRCK	1	9.1e-05	114.69	95.113	114.69	0.81961	252500000	1	NaN	1	96.673	NaN	114.69
P62266	86	P62266	P62266	40S ribosomal protein S23	RPS23	RVQLIKNGKKITAFVPNDGCLNFIEENDEVL	2315	P	3	2983		RVQLIKNGKK	I	T	A	F	V	P	N	D	G	C	L	NFIEENDEVL	1	0.0071214	96.052	85.441	50.857	0.57095	317700000	1	1	1	61.101	96.052	58.877
P62269	74	P62269	P62269	40S ribosomal protein S18	RPS18	LTEDEVERVITIMQNPRQYKIPDWFLNRQKD	2316	P	4	2984		LTEDEVERVI	T	I	M	Q	N	P	R	Q	Y	K	I	PDWFLNRQKD	1	0.000144972	83.213	83.213	43.799	-1.0093	3770100000	1	1	NaN	41.521	83.213	NaN
P62280	115	P62280	P62280	40S ribosomal protein S11	RPS11	NRFEKRHKNMSVHLSPCFRDVQIGDIVTVGE	2317	P	4	2987		NRFEKRHKNM	S	V	H	L	S	P	C	F	R	D	V	QIGDIVTVGE	0.999951	0.0107211	44.365	34.821	43.068	-0.50382	180020000	0.999914	0.999951	NaN	44.365	43.068	NaN
P62314	52	P62314	P62314	Small nuclear ribonucleoprotein Sm D1	SNRPD1	NTHLKAVKMTLKNREPVQLETLSIRGNNIRY	2320	P	4	2993		NTHLKAVKMT	L	K	N	R	E	P	V	Q	L	E	T	LSIRGNNIRY	1	0.0212757	56.215	47.391	56.215	-0.39406	50294000	1	NaN	NaN	56.215	NaN	NaN
P62316	78	P62316	P62316	Small nuclear ribonucleoprotein Sm D2	SNRPD2	CNMVLENVKEMWTEVPKSGKGKKKSKPVNKD	2321	P	3	2994		CNMVLENVKE	M	W	T	E	V	P	K	S	G	K	G	KKKSKPVNKD	1	0.000392695	92.551	88.523	92.551	0.11984	105090000	1	1	NaN	92.551	55.33	NaN
P62316	13	P62316	P62316	Small nuclear ribonucleoprotein Sm D2	SNRPD2	___MSLLNKPKSEMTPEELQKREEEEFNTGP	2322	P	4	2994		___MSLLNKP	K	S	E	M	T	P	E	E	L	Q	K	REEEEFNTGP	0.999977	5.01e-05	71.503	60.987	71.297	0.58796	1628700000	0.997731	0.999977	0.982472	71.503	71.297	41.89
P62333	227	P62333	P62333	26S protease regulatory subunit 10B	PSMC6	ARLIREMFNYARDHQPCIIFMDEIDAIGGRR	2324	P	5	2999		ARLIREMFNY	A	R	D	H	Q	P	C	I	I	F	M	DEIDAIGGRR	1	0.00132177	55.985	44.568	55.985	0.30851	35936000	1	1	NaN	53.188	55.985	NaN
P62487	126	P62487	P62487	DNA-directed RNA polymerase II subunit RPB7	POLR2G	HSIPSEMEFDPNSNPPCYKTMDEDIVIQQDD	2325	P	3	3003		HSIPSEMEFD	P	N	S	N	P	P	C	Y	K	T	M	DEDIVIQQDD	0.59805	0.00163458	67.994	64.706	67.994	-0.66688	42614000	0.59805	NaN	NaN	67.994	NaN	NaN
P62701	83	P62701	P62701	40S ribosomal protein S4, X isoform	RPS4X	RFIKIDGKVRTDITYPAGFMDVISIDKTGEN	2327	P	3	3008		RFIKIDGKVR	T	D	I	T	Y	P	A	G	F	M	D	VISIDKTGEN	1	1.16e-29	193.47	182.2	53.844	0.65903	2143300000	1	1	1	122.93	193.47	139.65
P62826	160	P62826	P62826	GTP-binding nuclear protein Ran	RAN	QYYDISAKSNYNFEKPFLWLARKLIGDPNLE	2331	P	4	3017		QYYDISAKSN	Y	N	F	E	K	P	F	L	W	L	A	RKLIGDPNLE	1	0.0186422	143.97	130.17	55.724	-0.16654	2191300000	1	1	1	143.97	131.37	135.99
P62826	49	P62826	P62826	GTP-binding nuclear protein Ran	RAN	EFEKKYVATLGVEVHPLVFHTNRGPIKFNVW	2332	P	4	3017		EFEKKYVATL	G	V	E	V	H	P	L	V	F	H	T	NRGPIKFNVW	1	3.63e-29	161.24	156.28	48.697	-2.7765	941220000	1	1	1	120.57	161.24	114.98
P62826	58	P62826	P62826	GTP-binding nuclear protein Ran	RAN	LGVEVHPLVFHTNRGPIKFNVWDTAGQEKFG	2333	P	4	3017		LGVEVHPLVF	H	T	N	R	G	P	I	K	F	N	V	WDTAGQEKFG	1	3.63e-29	161.24	156.28	48.697	-2.7765	941220000	1	1	1	120.57	161.24	114.98
P62829	21	P62829	P62829	60S ribosomal protein L23	RPL23	RGGSSGAKFRISLGLPVGAVINCADNTGAKN	2334	P	2	3018		RGGSSGAKFR	I	S	L	G	L	P	V	G	A	V	I	NCADNTGAKN	1	0.000406709	97.631	90.188	76.759	0.47942	90612000	1	1	1	97.631	79.614	76.759
P62917	206	P62917	P62917	60S ribosomal protein L8	RPL8	AKRNCWPRVRGVAMNPVEHPFGGGNHQHIGK	2339	P	6	3036		AKRNCWPRVR	G	V	A	M	N	P	V	E	H	P	F	GGGNHQHIGK	0.999883	0.0166788	48.115	44.7	46.678	-0.51922	1141600000	0.999801	0	0.999883	48.115	NaN	46.678
P62917	210	P62917	P62917	60S ribosomal protein L8	RPL8	CWPRVRGVAMNPVEHPFGGGNHQHIGKPSTI	2340	P	2	3036		CWPRVRGVAM	N	P	V	E	H	P	F	G	G	G	N	HQHIGKPSTI	1	2.33e-56	196.18	176.28	156	-0.42684	174710000000	1	1	1	189.64	192.47	196.18
P62917	222	P62917	P62917	60S ribosomal protein L8	RPL8	VEHPFGGGNHQHIGKPSTIRRDAPAGRKVGL	2341	P	4	3036		VEHPFGGGNH	Q	H	I	G	K	P	S	T	I	R	R	DAPAGRKVGL	0.998785	3.66e-48	192.47	180.39	124.86	0.69381	13201000000	0.998785	0.822082	0.817544	124.86	192.47	155.44
P62937	105	P62937	P62937	Peptidyl-prolyl cis-trans isomerase A;Peptidyl-prolyl cis-trans isomerase A, N-terminally processed	PPIA	LKHTGPGILSMANAGPNTNGSQFFICTAKTE	2342	P	2	3037		LKHTGPGILS	M	A	N	A	G	P	N	T	N	G	S	QFFICTAKTE	1	5.09e-11	102.38	86.436	102.38	4.1295	1250700000	1	1	1	65.753	102.38	72.227
P62937	4	P62937	P62937	Peptidyl-prolyl cis-trans isomerase A;Peptidyl-prolyl cis-trans isomerase A, N-terminally processed	PPIA	____________MVNPTVFFDIAVDGEPLGR	2344	P	2	3037		__________	_	_	M	V	N	P	T	V	F	F	D	IAVDGEPLGR	1	0.0013462	70.963	65.786	70.963	2.837	675260000	1	0.999999	NaN	70.963	65.092	NaN
P62979	122	P62979	P62979	Ubiquitin-40S ribosomal protein S27a;Ubiquitin;40S ribosomal protein S27a	RPS27A	KVDENGKISRLRRECPSDECGAGVFMASHFD	2345	P	5	3039		KVDENGKISR	L	R	R	E	C	P	S	D	E	C	G	AGVFMASHFD	1	0.00864155	52.298	50.883	43.162	0.49601	108040000	1	NaN	1	52.298	NaN	43.162
P62993	57	P62993	P62993	Growth factor receptor-bound protein 2	GRB2	NGKDGFIPKNYIEMKPHPWFFGKIPRAKAEE	2346	P	4	3041		NGKDGFIPKN	Y	I	E	M	K	P	H	P	W	F	F	GKIPRAKAEE	1	0.00309566	77.527	67.869	46.481	-1.934	1293000000	1	1	1	77.527	64.675	53.754
P62993	59	P62993	P62993	Growth factor receptor-bound protein 2	GRB2	KDGFIPKNYIEMKPHPWFFGKIPRAKAEEML	2347	P	4	3041		KDGFIPKNYI	E	M	K	P	H	P	W	F	F	G	K	IPRAKAEEML	1	0.00309566	77.527	67.869	46.481	-1.934	792750000	1	1	1	77.527	64.675	46.481
P63000	106	P63000	P63000	Ras-related C3 botulinum toxin substrate 1	RAC1	ENVRAKWYPEVRHHCPNTPIILVGTKLDLRD	2350	P	3	3043		ENVRAKWYPE	V	R	H	H	C	P	N	T	P	I	I	LVGTKLDLRD	0.999576	0.0170225	61.657	50.713	56.527	0.0046789	203180000	0.999576	0.997268	NaN	61.657	51.771	NaN
P63010	496	P63010	P63010	AP-2 complex subunit beta	AP2B1	QLTLLTAIVKLFLKKPSETQELVQQVLSLAT	2351	P	3	3044		QLTLLTAIVK	L	F	L	K	K	P	S	E	T	Q	E	LVQQVLSLAT	0.999997	0.011963	62.032	55.871	62.032	4.4825	0	NaN	NaN	0.999997	NaN	NaN	62.032
P63151	319	P63151	P63151	Serine/threonine-protein phosphatase 2A 55 kDa regulatory subunit B alpha isoform	PPP2R2A	DYLSVKIWDLNMENRPVETYQVHEYLRSKLC	2358	P	3	3051		DYLSVKIWDL	N	M	E	N	R	P	V	E	T	Y	Q	VHEYLRSKLC	1	0.0233776	55.881	49.978	55.881	-4.161	0	NaN	NaN	1	NaN	NaN	55.881
P63241;Q6IS14;Q9GZV4	74;74;74	P63241;Q9GZV4	P63241	Eukaryotic translation initiation factor 5A-1;Eukaryotic translation initiation factor 5A-1-like;Eukaryotic translation initiation factor 5A-2	EIF5A;EIF5AL1;EIF5A2	VGIDIFTGKKYEDICPSTHNMDVPNIKRNDF;VGIDIFTGKKYEDICPSTHNMDVPNIKRNDY	2361	P	3	3059;7788		VGIDIFTGKK	Y	E	D	I	C	P	S	T	H	N	M	DVPNIKRNDF	1	3.11e-05	107.78	104.25	107.78	0.066242	15022000000	1	0.99998	0.999998	107.78	89.197	82.01
P63241;Q6IS14;Q9GZV4	82;82;82	P63241;Q9GZV4	P63241	Eukaryotic translation initiation factor 5A-1;Eukaryotic translation initiation factor 5A-1-like;Eukaryotic translation initiation factor 5A-2	EIF5A;EIF5AL1;EIF5A2	KKYEDICPSTHNMDVPNIKRNDFQLIGIQDG;KKYEDICPSTHNMDVPNIKRNDYQLICIQDG	2362	P	4	3059;7788		KKYEDICPST	H	N	M	D	V	P	N	I	K	R	N	DFQLIGIQDG	0.999185	0.000631315	75.548	66.502	75.548	-1.3835	28749000	0.999185	0	0	75.548	NaN	NaN
P63244	243	P63244	P63244	Guanine nucleotide-binding protein subunit beta-2-like 1;Guanine nucleotide-binding protein subunit beta-2-like 1, N-terminally processed	GNB2L1	YTLDGGDIINALCFSPNRYWLCAATGPSIKI	2364	P	3	3060		YTLDGGDIIN	A	L	C	F	S	P	N	R	Y	W	L	CAATGPSIKI	1	0.00251792	63.46	58.25	63.46	0.19857	75389000	1	NaN	NaN	63.46	NaN	NaN
P63244	202	P63244	P63244	Guanine nucleotide-binding protein subunit beta-2-like 1;Guanine nucleotide-binding protein subunit beta-2-like 1, N-terminally processed	GNB2L1	NHIGHTGYLNTVTVSPDGSLCASGGKDGQAM	2365	P	4	3060		NHIGHTGYLN	T	V	T	V	S	P	D	G	S	L	C	ASGGKDGQAM	1	0.000105838	85.185	79.392	40.819	-0.64152	1778900000	1	1	1	85.185	59.372	40.819
P67809	206	P67809	P67809	Nuclease-sensitive element-binding protein 1	YBX1	RRFPPYYMRRPYGRRPQYSNPPVQGEVMEGA	2367	P	4	3066		RRFPPYYMRR	P	Y	G	R	R	P	Q	Y	S	N	P	PVQGEVMEGA	0.999999	4.7e-05	64.733	55.82	61.732	-0.32891	52765000	0.999999	NaN	0.99999	64.733	NaN	51.568
P67809	211	P67809	P67809	Nuclease-sensitive element-binding protein 1	YBX1	YYMRRPYGRRPQYSNPPVQGEVMEGADNQGA	2368	P	4	3066		YYMRRPYGRR	P	Q	Y	S	N	P	P	V	Q	G	E	VMEGADNQGA	0.999999	1.45e-05	72.951	66.62	61.732	-0.32891	40296000	0.999999	0.898241	0.999992	61.732	72.951	51.568
P67809	212	P67809	P67809	Nuclease-sensitive element-binding protein 1	YBX1	YMRRPYGRRPQYSNPPVQGEVMEGADNQGAG	2369	P	4	3066		YMRRPYGRRP	Q	Y	S	N	P	P	V	Q	G	E	V	MEGADNQGAG	0.999999	0.000150648	61.732	56.301	61.732	-0.32891	35196000	0.999999	NaN	0.999992	61.732	NaN	51.568
P68032	72	P68032	P68032	Actin, alpha cardiac muscle 1	ACTC1	GDEAQSKRGILTLKYPIEHGIITNWDDMEKI	2372	P	6	3070		GDEAQSKRGI	L	T	L	K	Y	P	I	E	H	G	I	ITNWDDMEKI	1	1.99e-07	72.707	68.594	46.404	-0.94563	593600000	1	1	1	69.674	72.707	58.398
P68036	41	P68036	P68036	Ubiquitin-conjugating enzyme E2 L3	UBE2L3	QVDEANLLTWQGLIVPDNPPYDKGAFRIEIN	2373	P	3	3071		QVDEANLLTW	Q	G	L	I	V	P	D	N	P	P	Y	DKGAFRIEIN	0.857072	0.000808123	63.901	55.828	63.901	0.35142	25590000	NaN	0.857072	NaN	NaN	63.901	NaN
P68036	44	P68036	P68036	Ubiquitin-conjugating enzyme E2 L3	UBE2L3	EANLLTWQGLIVPDNPPYDKGAFRIEINFPA	2374	P	3	3071		EANLLTWQGL	I	V	P	D	N	P	P	Y	D	K	G	AFRIEINFPA	0.857072	0.000808123	63.901	55.828	63.901	0.35142	25590000	NaN	0.857072	NaN	NaN	63.901	NaN
P68104;Q5VTE0	237;237	P68104;Q5VTE0	P68104	Elongation factor 1-alpha 1;Putative elongation factor 1-alpha-like 3	EEF1A1;EEF1A1P5	NASGTTLLEALDCILPPTRPTDKPLRLPLQD	2375	P	2	3072;4551		NASGTTLLEA	L	D	C	I	L	P	P	T	R	P	T	DKPLRLPLQD	0.817665	3.17e-07	133.86	127.05	133.86	-0.092985	152350000	0.817665	0.761812	NaN	133.86	77.191	NaN
P68104;Q5VTE0	263;263	P68104;Q5VTE0	P68104	Elongation factor 1-alpha 1;Putative elongation factor 1-alpha-like 3	EEF1A1;EEF1A1P5	LPLQDVYKIGGIGTVPVGRVETGVLKPGMVV	2376	P	5	3072;4551		LPLQDVYKIG	G	I	G	T	V	P	V	G	R	V	E	TGVLKPGMVV	0.957515	6.95e-08	112.13	107.42	76.956	-0.18304	5361800000	0.809645	0.795253	0.957515	70.08	112.13	80.721
P68104;Q5VTE0	185;185	P68104;Q5VTE0	P68104	Elongation factor 1-alpha 1;Putative elongation factor 1-alpha-like 3	EEF1A1;EEF1A1P5	IVKEVSTYIKKIGYNPDTVAFVPISGWNGDN	2378	P	3	3072;4551		IVKEVSTYIK	K	I	G	Y	N	P	D	T	V	A	F	VPISGWNGDN	0.607076	0.00135735	41.661	41.661	41.661	0.40084	107330000	0.607076	0	0.561096	41.661	NaN	41.661
P68104;Q5VTE0	192;192	P68104;Q5VTE0	P68104	Elongation factor 1-alpha 1;Putative elongation factor 1-alpha-like 3	EEF1A1;EEF1A1P5	YIKKIGYNPDTVAFVPISGWNGDNMLEPSAN	2379	P	4	3072;4551		YIKKIGYNPD	T	V	A	F	V	P	I	S	G	W	N	GDNMLEPSAN	0.999987	2.06e-10	84.516	84.516	61.099	-2.4785	22784000000	0.99141	0.999987	0.999955	57.919	61.099	84.516
P68104;Q5VTE0	204;204	P68104;Q5VTE0	P68104	Elongation factor 1-alpha 1;Putative elongation factor 1-alpha-like 3	EEF1A1;EEF1A1P5	AFVPISGWNGDNMLEPSANMPWFKGWKVTRK	2380	P	4	3072;4551		AFVPISGWNG	D	N	M	L	E	P	S	A	N	M	P	WFKGWKVTRK	1	7.71e-24	122.11	122.11	108.52	-0.89784	14955000000	0.999999	1	0.967477	115.3	122.11	109.11
P68104;Q5VTE0	209;209	P68104;Q5VTE0	P68104	Elongation factor 1-alpha 1;Putative elongation factor 1-alpha-like 3	EEF1A1;EEF1A1P5	SGWNGDNMLEPSANMPWFKGWKVTRKDGNAS	2381	P	4	3072;4551		SGWNGDNMLE	P	S	A	N	M	P	W	F	K	G	W	KVTRKDGNAS	1	1.34e-07	115.3	111.22	108.52	-0.89784	7174300000	0.999999	1	0.960628	115.3	108.52	49.567
P68104	359	P68104	P68104	Elongation factor 1-alpha 1	EEF1A1	VIILNHPGQISAGYAPVLDCHTAHIACKFAE	2385	P	5	3072		VIILNHPGQI	S	A	G	Y	A	P	V	L	D	C	H	TAHIACKFAE	0.853997	1.64e-06	51.203	47.634	40.206	-0.36711	275350000	0.853997	0	0.761635	40.206	NaN	51.203
P68104;Q5VTE0	420;420	P68104;Q5VTE0	P68104	Elongation factor 1-alpha 1;Putative elongation factor 1-alpha-like 3	EEF1A1;EEF1A1P5	VPGKPMCVESFSDYPPLGRFAVRDMRQTVAV	2387	P	3	3072;4551		VPGKPMCVES	F	S	D	Y	P	P	L	G	R	F	A	VRDMRQTVAV	0.526794	8.58e-05	73.805	73.805	73.805	0.64518	15063000	0.526794	0	0	73.805	NaN	NaN
P68104;Q5VTE0	406;406	P68104;Q5VTE0	P68104	Elongation factor 1-alpha 1;Putative elongation factor 1-alpha-like 3	EEF1A1;EEF1A1P5	PKFLKSGDAAIVDMVPGKPMCVESFSDYPPL	2388	P	2	3072;4551		PKFLKSGDAA	I	V	D	M	V	P	G	K	P	M	C	VESFSDYPPL	1	5.67e-47	185.14	174.09	92.538	-1.1219	6245700000	1	0.99996	0.999999	125.78	185.14	120.7
P68363;P68366;Q71U36;P0DPH8;P0DPH7;Q6PEY2	298;298;298;298;298;298	P68363;P68366;Q71U36	P68363	Tubulin alpha-1B chain;Tubulin alpha-4A chain;Tubulin alpha-1A chain;Tubulin alpha-3E chain	TUBA1B;TUBA4A;TUBA1A;TUBA3E	HEQLSVAEITNACFEPANQMVKCDPRHGKYM	2389	P	3	3074;3075;5044		HEQLSVAEIT	N	A	C	F	E	P	A	N	Q	M	V	KCDPRHGKYM	1	5.39e-12	126.61	120.45	41.904	1.3883	3768500000	1	1	1	109.85	126.61	87.509
P68363;P68366;Q71U36;P0DPH8;P0DPH7;Q6PEY2	274;274;274;274;274;274	P68363;P68366;Q71U36	P68363	Tubulin alpha-1B chain;Tubulin alpha-4A chain;Tubulin alpha-1A chain;Tubulin alpha-3E chain	TUBA1B;TUBA4A;TUBA1A;TUBA3E	LVPYPRIHFPLATYAPVISAEKAYHEQLSVA	2390	P	4	3074;3075;5044		LVPYPRIHFP	L	A	T	Y	A	P	V	I	S	A	E	KAYHEQLSVA	0.909752	0.000949897	54.011	47.612	54.011	1.3083	59263000	NaN	0.909752	NaN	NaN	54.011	NaN
P68363;Q71U36;P0DPH8;P0DPH7;Q6PEY2;Q9BQE3	32;32;32;32;32;32	P68363;Q71U36;Q9BQE3	P68363	Tubulin alpha-1B chain;Tubulin alpha-1A chain;Tubulin alpha-3E chain;Tubulin alpha-1C chain	TUBA1B;TUBA1A;TUBA3E;TUBA1C	GNACWELYCLEHGIQPDGQMPSDKTIGGGDD	2391	P	5	3074;5044;7345		GNACWELYCL	E	H	G	I	Q	P	D	G	Q	M	P	SDKTIGGGDD	0.878796	7.57e-08	56.475	53.004	56.475	-0.85331	34575000	0.878796	NaN	NaN	56.475	NaN	NaN
P68363;P68366	348;348	P68363;P68366	P68363	Tubulin alpha-1B chain;Tubulin alpha-4A chain	TUBA1B;TUBA4A	AAIKTKRSIQFVDWCPTGFKVGINYQPPTVV;ATIKTKRSIQFVDWCPTGFKVGINYQPPTVV	2392	P	2	3074;3075		AAIKTKRSIQ	F	V	D	W	C	P	T	G	F	K	V	GINYQPPTVV	1	0.035501	101.12	82.848	101.12	-0.48766	648630000	1	1	NaN	101.12	101.12	NaN
P68363;P68366	359;359	P68363;P68366	P68363	Tubulin alpha-1B chain;Tubulin alpha-4A chain	TUBA1B;TUBA4A	VDWCPTGFKVGINYQPPTVVPGGDLAKVQRA	2393	P	3	3074;3075		VDWCPTGFKV	G	I	N	Y	Q	P	P	T	V	V	P	GGDLAKVQRA	0.811367	0.035501	45.527	35.289	45.527	1.1642	45966000	NaN	0.811367	NaN	NaN	45.527	NaN
P78312	995	P78312	P78312	Protein FAM193A	FAM193A	ETSSHSPSRHMNHSEPRPGLGADGDAADPVD	2395	P	5	3083		ETSSHSPSRH	M	N	H	S	E	P	R	P	G	L	G	ADGDAADPVD	0.546218	0.00065274	59.282	56.402	59.282	-0.16877	8393700	0.546218	NaN	NaN	59.282	NaN	NaN
P78318	260	P78318	P78318	Immunoglobulin-binding protein 1	IGBP1	LTRNMAQAKVFGAGYPSLPTMTVSDWYEQHR	2397	P	4	3087		LTRNMAQAKV	F	G	A	G	Y	P	S	L	P	T	M	TVSDWYEQHR	1	0.0059027	40.369	31.402	40.369	-0.12197	101900000	1	NaN	NaN	40.369	NaN	NaN
P78344	503	P78344	P78344	Eukaryotic translation initiation factor 4 gamma 2	EIF4G2	PKLQPQITMIPPSAQPPRTQTPPLGQTPQLG	2401	P	3	3092		PKLQPQITMI	P	P	S	A	Q	P	P	R	T	Q	T	PPLGQTPQLG	0.836794	0.00864073	47.429	31.159	47.429	-1.0974	4714400	NaN	NaN	0.836794	NaN	NaN	47.429
P78344	504	P78344	P78344	Eukaryotic translation initiation factor 4 gamma 2	EIF4G2	KLQPQITMIPPSAQPPRTQTPPLGQTPQLGL	2402	P	3	3092		KLQPQITMIP	P	S	A	Q	P	P	R	T	Q	T	P	PLGQTPQLGL	0.836794	0.00864073	47.429	31.159	47.429	-1.0974	4714400	NaN	NaN	0.836794	NaN	NaN	47.429
P78344	509	P78344	P78344	Eukaryotic translation initiation factor 4 gamma 2	EIF4G2	ITMIPPSAQPPRTQTPPLGQTPQLGLKTNPP	2403	P	3	3092		ITMIPPSAQP	P	R	T	Q	T	P	P	L	G	Q	T	PQLGLKTNPP	0.836789	0.00864073	47.429	31.159	47.429	-1.0974	4714400	NaN	NaN	0.836789	NaN	NaN	47.429
P78344	510	P78344	P78344	Eukaryotic translation initiation factor 4 gamma 2	EIF4G2	TMIPPSAQPPRTQTPPLGQTPQLGLKTNPPL	2404	P	3	3092		TMIPPSAQPP	R	T	Q	T	P	P	L	G	Q	T	P	QLGLKTNPPL	0.836789	0.00864073	47.429	31.159	47.429	-1.0974	4714400	NaN	NaN	0.836789	NaN	NaN	47.429
P78344	515	P78344	P78344	Eukaryotic translation initiation factor 4 gamma 2	EIF4G2	SAQPPRTQTPPLGQTPQLGLKTNPPLIQEKP	2405	P	3	3092		SAQPPRTQTP	P	L	G	Q	T	P	Q	L	G	L	K	TNPPLIQEKP	0.612809	0.00864073	47.429	31.159	47.429	-1.0974	4714400	NaN	NaN	0.612809	NaN	NaN	47.429
P78344	416	P78344	P78344	Eukaryotic translation initiation factor 4 gamma 2	EIF4G2	HRSNQLFNGHGGHIMPPTQSQFGEMGGKFMK	2407	P	3	3092		HRSNQLFNGH	G	G	H	I	M	P	P	T	Q	S	Q	FGEMGGKFMK	0.855487	4.23e-05	84.933	84.933	84.933	-0.35474	11190000	NaN	NaN	0.855487	NaN	NaN	84.933
P78344	417	P78344	P78344	Eukaryotic translation initiation factor 4 gamma 2	EIF4G2	RSNQLFNGHGGHIMPPTQSQFGEMGGKFMKS	2408	P	4	3092		RSNQLFNGHG	G	H	I	M	P	P	T	Q	S	Q	F	GEMGGKFMKS	0.576194	0.00106855	56.292	49.493	56.292	-1.9	77497000	NaN	NaN	0.576194	NaN	NaN	56.292
P78347	918	P78347	P78347	General transcription factor II-I	GTF2I	CVVVDGMPPGVSFKAPSYLEISSMRRILDSA	2412	P	3	3095		CVVVDGMPPG	V	S	F	K	A	P	S	Y	L	E	I	SSMRRILDSA	0.684105	0.00283689	48.088	48.088	48.088	-0.37536	11156000	NaN	0.684105	NaN	NaN	48.088	NaN
P78371	429	P78371	P78371	T-complex protein 1 subunit beta	CCT2	EMLMAHAVTQLANRTPGKEAVAMESYAKALR	2414	P	5	3102		EMLMAHAVTQ	L	A	N	R	T	P	G	K	E	A	V	AMESYAKALR	1	6.28e-09	88.24	79.55	44.107	0.64709	1123200000	1	1	1	66.828	88.24	68.741
P78406	88	P78406	P78406	mRNA export factor	RAE1	DSGQTIPKAQQMHTGPVLDVCWSDDGSKVFT	2415	P	3	3107		DSGQTIPKAQ	Q	M	H	T	G	P	V	L	D	V	C	WSDDGSKVFT	1	0.00775567	56.529	53.241	44.729	-1.3773	35651000	1	NaN	NaN	56.529	NaN	NaN
P78417	179	P78417	P78417	Glutathione S-transferase omega-1	GSTO1	FFGGNSISMIDYLIWPWFERLEAMKLNECVD	2416	P	4	3109		FFGGNSISMI	D	Y	L	I	W	P	W	F	E	R	L	EAMKLNECVD	0.998486	0.000950169	40.952	40.952	40.952	-3.2068	22942000	NaN	NaN	0.998486	NaN	NaN	40.952
P78527	2096	P78527	P78527	DNA-dependent protein kinase catalytic subunit	PRKDC	LELEMDELNRHECMAPLTALVKHMHRSLGPP	2419	P	5	3113		LELEMDELNR	H	E	C	M	A	P	L	T	A	L	V	KHMHRSLGPP	0.999998	3.99e-05	76.162	76.162	76.162	-1.4354	256590000	0.999948	NaN	0.999998	51.566	NaN	76.162
P78527	903	P78527	P78527	DNA-dependent protein kinase catalytic subunit	PRKDC	REKRLSFAVPFREMKPVIFLDVFLPRVTELA	2420	P	3	3113		REKRLSFAVP	F	R	E	M	K	P	V	I	F	L	D	VFLPRVTELA	1	0.00383674	99.941	89.66	99.941	0.040972	3014000000	1	NaN	0.981509	99.941	NaN	95.651
P78527	1493	P78527	P78527	DNA-dependent protein kinase catalytic subunit	PRKDC	SVGTELLSLVYKGIAPGDERQCLPSLDLSCK	2421	P	3	3113		SVGTELLSLV	Y	K	G	I	A	P	G	D	E	R	Q	CLPSLDLSCK	0.887873	0.0273435	62.765	48.293	62.765	1.0829	62652000	0.887873	NaN	NaN	62.765	NaN	NaN
P78527	3345	P78527	P78527	DNA-dependent protein kinase catalytic subunit	PRKDC	LGTTYRIIANALSSEPACLAEIEEDKARRIL	2422	P	3	3113		LGTTYRIIAN	A	L	S	S	E	P	A	C	L	A	E	IEEDKARRIL	1	1.44e-06	99.407	86.465	51.688	0.96762	440520000	1	1	1	83.204	99.407	71.148
P78527	4056	P78527	P78527	DNA-dependent protein kinase catalytic subunit	PRKDC	RQKICYAKRKLAGANPAVITCDELLLGHEKA	2425	P	5	3113		RQKICYAKRK	L	A	G	A	N	P	A	V	I	T	C	DELLLGHEKA	0.999999	5.52e-07	77.065	72.208	77.065	-0.20865	398660000	0.999918	0.999982	0.999999	60.348	66.879	77.065
P78527	897	P78527	P78527	DNA-dependent protein kinase catalytic subunit	PRKDC	SYVAWDREKRLSFAVPFREMKPVIFLDVFLP	2426	P	3	3113		SYVAWDREKR	L	S	F	A	V	P	F	R	E	M	K	PVIFLDVFLP	0.993027	4.33e-08	121.47	118.92	121.47	0.64884	6008600000	0.943525	NaN	0.993027	100.7	NaN	121.47
P78527	3201	P78527	P78527	DNA-dependent protein kinase catalytic subunit	PRKDC	RCFFLSKIEEKLTPLPEDNSMNVDQDGDPSD	2427	P	3	3113		RCFFLSKIEE	K	L	T	P	L	P	E	D	N	S	M	NVDQDGDPSD	0.998778	1.31e-08	111.61	111.61	81.665	-0.98862	467060000	0.998778	0.981847	0.982529	104.31	111.61	74.029
P78527	3214	P78527	P78527	DNA-dependent protein kinase catalytic subunit	PRKDC	PLPEDNSMNVDQDGDPSDRMEVQEQEEDISS	2428	P	4	3113		PLPEDNSMNV	D	Q	D	G	D	P	S	D	R	M	E	VQEQEEDISS	0.997061	0.00010765	56.637	56.637	56.637	0.18948	24295000	NaN	NaN	0.997061	NaN	NaN	56.637
P78527	1410	P78527	P78527	DNA-dependent protein kinase catalytic subunit	PRKDC	LPDVCVNLMKALKMSPYKDILETHLREKITA	2430	P	4	3113		LPDVCVNLMK	A	L	K	M	S	P	Y	K	D	I	L	ETHLREKITA	1	0.00124166	89.959	85.158	53.328	-0.48576	935430000	1	1	1	89.959	64.136	52.265
P78527	2373	P78527	P78527	DNA-dependent protein kinase catalytic subunit	PRKDC	DKFIVCLNKVTKSFPPLADRFMNAVFFLLPK	2432	P	2	3113		DKFIVCLNKV	T	K	S	F	P	P	L	A	D	R	F	MNAVFFLLPK	0.915048	4.78e-06	142.91	118.19	142.91	-0.24605	101500000	NaN	0.915048	NaN	NaN	142.91	NaN
P78527	2119	P78527	P78527	DNA-dependent protein kinase catalytic subunit	PRKDC	MHRSLGPPQGEEDSVPRDLPSWMKFLHGKLG	2433	P	3	3113		MHRSLGPPQG	E	E	D	S	V	P	R	D	L	P	S	WMKFLHGKLG	0.997728	0.00621771	54.672	45.963	54.672	3.235	131460000	0.997728	0.996523	0.996426	54.672	48.656	43.12
P78560	98	P78560	P78560	Death domain-containing protein CRADD	CRADD	REKLKKAREEAMTDLPAGDRLTGIPSHILNS	2436	P	4	3120		REKLKKAREE	A	M	T	D	L	P	A	G	D	R	L	TGIPSHILNS	0.982856	4.58e-05	69.427	63.333	69.427	1.7668	11231000	NaN	0.982856	NaN	NaN	69.427	NaN
P82650	129	P82650	P82650	28S ribosomal protein S22, mitochondrial	MRPS22	ATRQAVEAAKVRLKMPPVLEERVPINDVLAE	2437	P	4	3133		ATRQAVEAAK	V	R	L	K	M	P	P	V	L	E	E	RVPINDVLAE	0.995698	0.000168629	81.341	76.335	81.341	-0.06335	85474000	NaN	0.995698	NaN	NaN	81.341	NaN
P82673	67	P82673	P82673	28S ribosomal protein S35, mitochondrial	MRPS35	ALPPRTEKMAVDQDWPSVYPVAAPFKPSAVP	2438	P	3	3136		ALPPRTEKMA	V	D	Q	D	W	P	S	V	Y	P	V	AAPFKPSAVP	0.999443	1.27e-08	126.46	120.62	126.46	-0.38857	1234300000	0.998131	0.999443	0.983134	102.67	126.46	81.292
P82673	71	P82673	P82673	28S ribosomal protein S35, mitochondrial	MRPS35	RTEKMAVDQDWPSVYPVAAPFKPSAVPLPVR	2439	P	3	3136		RTEKMAVDQD	W	P	S	V	Y	P	V	A	A	P	F	KPSAVPLPVR	0.999443	1.27e-08	126.46	120.62	126.46	-0.38857	1234300000	0.998131	0.999443	0.983134	102.67	126.46	81.292
P82675	379	P82675	P82675	28S ribosomal protein S5, mitochondrial	MRPS5	DKKGLHVVEIREECGPLPIVVASPRGPLRKD	2440	P	4	3137		DKKGLHVVEI	R	E	E	C	G	P	L	P	I	V	V	ASPRGPLRKD	0.978645	0.0244221	43.497	35.875	43.497	0.36972	48541000	NaN	0.978645	0.969868	NaN	43.497	42.904
P82933	316	P82933	P82933	28S ribosomal protein S9, mitochondrial	MRPS9	QLYFPITQDREQLMFPFHFVDRLGKHDVTCT	2441	P	3	3144		QLYFPITQDR	E	Q	L	M	F	P	F	H	F	V	D	RLGKHDVTCT	0.877403	0.00122851	78.286	73.477	59.573	-0.84336	33937000	NaN	0.877403	0.876311	NaN	59.573	78.286
P83436	67	P83436	P83436	Conserved oligomeric Golgi complex subunit 7	COG7	NHAVEETSHQALQNMPKVLRDVEALKQEASF	2443	P	4	3149		NHAVEETSHQ	A	L	Q	N	M	P	K	V	L	R	D	VEALKQEASF	1	2.93e-06	114.2	100.8	52.483	1.1603	281160000	1	1	1	52.483	114.2	87.511
P84098	26	P84098	P84098	60S ribosomal protein L19	RPL19	ASSVLRCGKKKVWLDPNETNEIANANSRQQI	2445	P	4	3159		ASSVLRCGKK	K	V	W	L	D	P	N	E	T	N	E	IANANSRQQI	1	0.0344262	42.118	36.908	42.118	0.83857	14882000	1	NaN	NaN	42.118	NaN	NaN
P84103	7	P84103	P84103	Serine/arginine-rich splicing factor 3	SRSF3	_________MHRDSCPLDCKVYVGNLGNNGN	2446	P	4	3161		_________M	H	R	D	S	C	P	L	D	C	K	V	YVGNLGNNGN	1	2.78e-05	91.722	89.347	41.423	0.15103	158190000	1	1	1	91.722	70.091	62.237
P85037	520	P85037	P85037	Forkhead box protein K1	FOXK1	SQQPAGHAIHVVQQAPTVTMVRVVTTSANSA	2447	P	4	3164		SQQPAGHAIH	V	V	Q	Q	A	P	T	V	T	M	V	RVVTTSANSA	0.864072	8.27e-05	68.516	68.516	68.516	0.13885	74456000	NaN	NaN	0.864072	NaN	NaN	68.516
P86791;P86790	109;109	P86791	P86791	Vacuolar fusion protein CCZ1 homolog;Vacuolar fusion protein CCZ1 homolog B	CCZ1;CCZ1B	NEPEENFWMVMVVRNPIIEKQSKDGKPVIEY	2448	P	4	3168		NEPEENFWMV	M	V	V	R	N	P	I	I	E	K	Q	SKDGKPVIEY	0.992749	0.00135772	60.991	60.991	60.991	-1.0491	10450000	NaN	NaN	0.992749	NaN	NaN	60.991
P98179	57	P98179	P98179	RNA-binding protein 3	RBM3	ETQRSRGFGFITFTNPEHASVAMRAMNGESL	2449	P	4	3180		ETQRSRGFGF	I	T	F	T	N	P	E	H	A	S	V	AMRAMNGESL	1	0.00542971	58.98	49.4	55.763	-0.076657	120680000	1	1	NaN	55.763	58.98	NaN
Q00059	123	Q00059	Q00059	Transcription factor A, mitochondrial	TFAM	QVYKEEISRFKEQLTPSQIMSLEKEIMDKHL	2452	P	2	3187		QVYKEEISRF	K	E	Q	L	T	P	S	Q	I	M	S	LEKEIMDKHL	1	0.0285754	75.695	51.544	75.695	3.6618	0	NaN	NaN	1	NaN	NaN	75.695
Q00341	691	Q00341	Q00341	Vigilin	HDLBP	IRSIMEECGGVHIHFPVEGSGSDTVVIRGPS	2455	P	4	3190		IRSIMEECGG	V	H	I	H	F	P	V	E	G	S	G	SDTVVIRGPS	1	0.000581928	57.278	44.601	57.278	0.54089	103950000	NaN	NaN	1	NaN	NaN	57.278
Q00534	244	Q00534	Q00534	Cyclin-dependent kinase 6	CDK6	GKILDVIGLPGEEDWPRDVALPRQAFHSKSA	2456	P	3	3192		GKILDVIGLP	G	E	E	D	W	P	R	D	V	A	L	PRQAFHSKSA	0.999711	3.9e-05	94.384	82.428	94.384	-0.65448	27330000	0.999711	NaN	NaN	94.384	NaN	NaN
Q00534	250	Q00534	Q00534	Cyclin-dependent kinase 6	CDK6	IGLPGEEDWPRDVALPRQAFHSKSAQPIEKF	2457	P	3	3192		IGLPGEEDWP	R	D	V	A	L	P	R	Q	A	F	H	SKSAQPIEKF	0.99844	3.9e-05	94.384	82.428	94.384	-0.65448	27330000	0.99844	NaN	NaN	94.384	NaN	NaN
Q00610	22	Q00610	Q00610	Clathrin heavy chain 1	CLTC	IRFQEHLQLQNLGINPANIGFSTLTMESDKF	2460	P	3	3198		IRFQEHLQLQ	N	L	G	I	N	P	A	N	I	G	F	STLTMESDKF	0.999901	0.000242023	44.317	42.929	44.317	-0.49676	1484000	0.999901	NaN	NaN	44.317	NaN	NaN
Q00610	1134	Q00610	Q00610	Clathrin heavy chain 1	CLTC	GMVKEAIDSYIKADDPSSYMEVVQAANTSGN	2461	P	4	3198		GMVKEAIDSY	I	K	A	D	D	P	S	S	Y	M	E	VVQAANTSGN	1	7.29e-46	175.34	172.08	175.34	0.069127	74528000	NaN	1	NaN	NaN	175.34	NaN
Q00610	873	Q00610	Q00610	Clathrin heavy chain 1	CLTC	LLPWLEARIHEGCEEPATHNALAKIYIDSNN	2462	P	3	3198		LLPWLEARIH	E	G	C	E	E	P	A	T	H	N	A	LAKIYIDSNN	1	0.0221595	53.777	42.962	48.177	0.13568	574120000	1	NaN	NaN	53.777	NaN	NaN
Q00610	593	Q00610	Q00610	Clathrin heavy chain 1	CLTC	GPLQTRLLEMNLMHAPQVADAILGNQMFTHY	2463	P	5	3198		GPLQTRLLEM	N	L	M	H	A	P	Q	V	A	D	A	ILGNQMFTHY	1	1.36e-16	138.34	130.14	138.34	-0.22595	3995700000	1	1	1	76.198	138.34	121.38
Q00610	65	Q00610	Q00610	Clathrin heavy chain 1	CLTC	VVIIDMNDPSNPIRRPISADSAIMNPASKVI	2466	P	4	3198		VVIIDMNDPS	N	P	I	R	R	P	I	S	A	D	S	AIMNPASKVI	0.741643	1.98e-07	102.01	97.43	81.91	0.72189	679370000	0.741643	0.729166	0.312548	81.91	102.01	54.703
Q00613	361	Q00613	Q00613	Heat shock factor protein 1	HSF1	TALTDARGHTDTEGRPPSPPPTSTPEKCLSV	2468	P	4	3199		TALTDARGHT	D	T	E	G	R	P	P	S	P	P	P	TSTPEKCLSV	0.886389	0.000255889	46.898	43.615	46.898	-1.2388	40325000	0.886389	0.867649	NaN	46.898	41.936	NaN
Q00613	362	Q00613	Q00613	Heat shock factor protein 1	HSF1	ALTDARGHTDTEGRPPSPPPTSTPEKCLSVA	2469	P	4	3199		ALTDARGHTD	T	E	G	R	P	P	S	P	P	P	T	STPEKCLSVA	0.886389	0.000255889	46.898	43.615	46.898	-1.2388	40325000	0.886389	0.867649	NaN	46.898	41.936	NaN
Q00613	364	Q00613	Q00613	Heat shock factor protein 1	HSF1	TDARGHTDTEGRPPSPPPTSTPEKCLSVACL	2470	P	4	3199		TDARGHTDTE	G	R	P	P	S	P	P	P	T	S	T	PEKCLSVACL	0.886236	0.000255889	46.898	43.615	46.898	-1.2388	40325000	0.886236	0.867649	NaN	46.898	41.936	NaN
Q00613	365	Q00613	Q00613	Heat shock factor protein 1	HSF1	DARGHTDTEGRPPSPPPTSTPEKCLSVACLD	2471	P	4	3199		DARGHTDTEG	R	P	P	S	P	P	P	T	S	T	P	EKCLSVACLD	0.886236	0.000255889	46.898	43.615	46.898	-1.2388	40325000	0.886236	0.867645	NaN	46.898	41.936	NaN
Q00613	366	Q00613	Q00613	Heat shock factor protein 1	HSF1	ARGHTDTEGRPPSPPPTSTPEKCLSVACLDK	2472	P	4	3199		ARGHTDTEGR	P	P	S	P	P	P	T	S	T	P	E	KCLSVACLDK	0.886236	0.000255889	46.898	43.615	46.898	-1.2388	40325000	0.886236	0.867706	NaN	46.898	41.936	NaN
Q00653	596	Q00653	Q00653	Nuclear factor NF-kappa-B p100 subunit;Nuclear factor NF-kappa-B p52 subunit	NFKB2	LLQSGAPAVPQLLHMPDFEGLYPVHLAVRAR	2473	P	3	3200		LLQSGAPAVP	Q	L	L	H	M	P	D	F	E	G	L	YPVHLAVRAR	0.886148	0.000617108	53.968	49.483	53.968	-1.5597	43698000	NaN	NaN	0.886148	NaN	NaN	53.968
Q00839	55	Q00839	Q00839	Heterogeneous nuclear ribonucleoprotein U	HNRNPU	AALDDEEAGGRPAMEPGNGSLDLGGDSAGRS	2476	P	3	3204		AALDDEEAGG	R	P	A	M	E	P	G	N	G	S	L	DLGGDSAGRS	0.867045	1.1e-08	126.34	120.56	72.113	-0.43676	288170000	0.867045	0.580526	0.575094	72.113	69.163	126.34
Q00839	468	Q00839	Q00839	Heterogeneous nuclear ribonucleoprotein U	HNRNPU	CAVEFNFGQKEKPYFPIPEEYTFIQNVPLED	2477	P	4	3204		CAVEFNFGQK	E	K	P	Y	F	P	I	P	E	E	Y	TFIQNVPLED	0.999197	0.00758657	67.979	61.949	67.979	-0.5517	116180000	0.999197	NaN	NaN	67.979	NaN	NaN
Q00839	470	Q00839	Q00839	Heterogeneous nuclear ribonucleoprotein U	HNRNPU	VEFNFGQKEKPYFPIPEEYTFIQNVPLEDRV	2478	P	4	3204		VEFNFGQKEK	P	Y	F	P	I	P	E	E	Y	T	F	IQNVPLEDRV	0.999372	0.00758657	67.979	61.949	67.979	-0.5517	116180000	0.999372	NaN	NaN	67.979	NaN	NaN
Q00839	443	Q00839	Q00839	Heterogeneous nuclear ribonucleoprotein U	HNRNPU	LGVAFKISKEVLAGRPLFPHVLCHNCAVEFN	2479	P	5	3204		LGVAFKISKE	V	L	A	G	R	P	L	F	P	H	V	LCHNCAVEFN	0.793501	0.00839723	42.746	37.202	42.746	-0.11972	31004000	NaN	NaN	0.793501	NaN	NaN	42.746
Q01105	92	Q01105	Q01105	Protein SET	SET	RQPFFQKRSELIAKIPNFWVTTFVNHPQVSA	2484	P	4	3210		RQPFFQKRSE	L	I	A	K	I	P	N	F	W	V	T	TFVNHPQVSA	1	2.47e-09	134.17	125.08	65.875	-1.0595	9202200000	1	1	1	132.96	134.17	121.45
Q01105	103	Q01105	Q01105	Protein SET	SET	IAKIPNFWVTTFVNHPQVSALLGEEDEEALH	2485	P	4	3210		IAKIPNFWVT	T	F	V	N	H	P	Q	V	S	A	L	LGEEDEEALH	1	2.79e-09	134.17	125.08	65.875	-1.0595	9159700000	1	1	1	132.96	134.17	121.45
Q01484	3924	Q01484	Q01484	Ankyrin-2	ANK2	SSEGTEKEEIMVQGMPQEPVNIEEGDGYSKV	2487	P	3	3219		SSEGTEKEEI	M	V	Q	G	M	P	Q	E	P	V	N	IEEGDGYSKV	0.868301	0.0157244	45.011	45.011	41.208	2.4803	13777000	NaN	NaN	0.868301	NaN	NaN	45.011
Q01518	96	Q01518	Q01518	Adenylyl cyclase-associated protein 1	CAP1	KLERALLVTASQCQQPAENKLSDLLAPISEQ	2490	P	2	3220		KLERALLVTA	S	Q	C	Q	Q	P	A	E	N	K	L	SDLLAPISEQ	1	0.0122151	123.51	106.67	97.813	0.58701	180380000	1	NaN	NaN	123.51	NaN	NaN
Q01518	148	Q01518	Q01518	Adenylyl cyclase-associated protein 1	CAP1	AVSESIQALGWVAMAPKPGPYVKEMNDAAMF	2491	P	4	3220		AVSESIQALG	W	V	A	M	A	P	K	P	G	P	Y	VKEMNDAAMF	1	0.000207109	67.899	61.804	67.899	-0.031146	91667000	0.812477	NaN	1	57.902	NaN	67.899
Q01518	150	Q01518	Q01518	Adenylyl cyclase-associated protein 1	CAP1	SESIQALGWVAMAPKPGPYVKEMNDAAMFYT	2492	P	4	3220		SESIQALGWV	A	M	A	P	K	P	G	P	Y	V	K	EMNDAAMFYT	1	0.000207109	67.899	61.804	67.899	-0.031146	91667000	0.812477	NaN	1	57.902	NaN	67.899
Q01518	152	Q01518	Q01518	Adenylyl cyclase-associated protein 1	CAP1	SIQALGWVAMAPKPGPYVKEMNDAAMFYTNR	2493	P	4	3220		SIQALGWVAM	A	P	K	P	G	P	Y	V	K	E	M	NDAAMFYTNR	1	0.000207109	67.899	61.804	67.899	-0.031146	42784000	NaN	NaN	1	NaN	NaN	67.899
Q01628;C9JQL5	18;18	Q01628	Q01628	Interferon-induced transmembrane protein 3;Putative dispanin subfamily A member 2d	IFITM3	HTVQTFFSPVNSGQPPNYEMLKEEHEVAVLG	2495	P	3	3222		HTVQTFFSPV	N	S	G	Q	P	P	N	Y	E	M	L	KEEHEVAVLG	0.919409	0.00280071	47.564	47.564	47.564	0.87319	27020000	NaN	0.919409	NaN	NaN	47.564	NaN
Q01826	487	Q01826	Q01826	DNA-binding protein SATB1	SATB1	PQVKTATIATERNGKPENNTMNINASIYDEI	2497	P	4	3230		PQVKTATIAT	E	R	N	G	K	P	E	N	N	T	M	NINASIYDEI	1	0.0034812	57.945	52.68	57.945	-0.77922	16365000	NaN	NaN	1	NaN	NaN	57.945
Q01844	480	Q01844	Q01844	RNA-binding protein EWS	EWSR1	GMPPPLRGGPGGPGGPGGPMGRMGGRGGDRG	2499	P	2	3232		GMPPPLRGGP	G	G	P	G	G	P	G	G	P	M	G	RMGGRGGDRG	0.727842	0.00604893	110.14	89.806	110.14	-0.48078	0	0.727842	NaN	NaN	110.14	NaN	NaN
Q01970	281	Q01970	Q01970	1-phosphatidylinositol 4,5-bisphosphate phosphodiesterase beta-3	PLCB3	PLRPSQARLLIEKYEPNQQFLERDQMSMEGF	2502	P	3	3236		PLRPSQARLL	I	E	K	Y	E	P	N	Q	Q	F	L	ERDQMSMEGF	1	0.0173643	60.398	51.066	60.398	-0.80812	0	NaN	1	NaN	NaN	60.398	NaN
Q02040	194	Q02040	Q02040	A-kinase anchor protein 17A	AKAP17A	EKFGEIRNVDIPMLDPYREEMTGRNFHTFSF	2503	P	3	3239		EKFGEIRNVD	I	P	M	L	D	P	Y	R	E	E	M	TGRNFHTFSF	0.735267	0.00788229	61.962	61.962	61.962	-0.79861	55671000	0.735267	NaN	NaN	61.962	NaN	NaN
Q02241	824	Q02241	Q02241	Kinesin-like protein KIF23	KIF23	HRRSRSAGDRWVDHKPASNMQTETVMQPHVP	2507	P	4	3248		HRRSRSAGDR	W	V	D	H	K	P	A	S	N	M	Q	TETVMQPHVP	0.853867	0.0246204	94.606	94.606	94.606	0.062533	141670000	0.784118	NaN	0.853867	64.701	NaN	94.606
[truncated: 1,977 more rows]

## Sheet: RCC4
Proteins	Positions within proteins	Leading proteins	Protein	Protein names	Gene names	Sequence window	id	Amino acid	Charge	Protein group IDs	Diagnostic peak	P-6	P-5	P-4	P-3	P-2	P-1	P	P+1	P+2	P+3	P+4	P+5	P+6	Localization prob	PEP	Score	Delta score	Score for localization	Mass error [ppm]	Intensity	DMSO Localization prob	FG Localization prob	MG Localization prob	DMSO Score	FG Score	MG Score
[truncated: 2,728 more rows]
