# Supplementary material for: Systematic characterization of site-specific proline hydroxylation using hydrophilic interaction chromatography and mass spectrometry
Source: bioRxiv preprint, doi:10.1101/2023.07.28.550951, version 4 (2025-11-29)
Supplement: Supplemental Table 4 [file 550951_file06.xlsx]

## Sheet: HEK293
Proteins	Positions within proteins	Leading proteins	Protein	Protein names	Gene names	Sequence window	id	Amino acid	Charge	Protein group IDs	Diagnostic peak	Localization prob	PEP	Score	Delta score	Score for localization	Mass error [ppm]	Intensity	DMSO Localization prob	FG Localization prob	MG Localization prob	DMSO Score	FG Score	MG Score
P0DPI2;A0A0B4J2D5	240;240	P0DPI2	P0DPI2			VVEAHVDQKNKVVTTPAFMCETALHYIHDGI	2	P	4	1		1	0.00293219	90.097	84.667	68.689	-0.53453	94402000	NaN	NaN	1	NaN	NaN	90.097
A1L0T0	215	A1L0T0	A1L0T0	Acetolactate synthase-like protein	ILVBL	TPGPVFVELPVDVLYPYFMVQKEMVPAKPPK	9	P	3	26		0.952909	0.00319635	43.554	43.554	43.554	1.4893	4004900	0.952909	NaN	NaN	43.554	NaN	NaN
A1L0T0	142	A1L0T0	A1L0T0	Acetolactate synthase-like protein	ILVBL	TNTVTAVKNAQMAQSPILLLGGAASTLLQNR	10	P	3	26		1	0.00571943	52.061	47.647	52.061	0.55284	5869900	1	NaN	NaN	52.061	NaN	NaN
A3KMH1	1374	A3KMH1	A3KMH1	von Willebrand factor A domain-containing protein 8	VWA8	ILSDEKNYATIVVGFPDLMSPSEVYSWKRPS	12	P	3	43		0.969307	0.0010081	71.528	63.559	71.528	0.32498	23342000	0.969307	NaN	NaN	71.528	NaN	NaN
A3KN83	1059	A3KN83	A3KN83	Protein strawberry notch homolog 1	SBNO1	NALEIVMKSIVNLDSPMVSPPPDYPGEFFKD	14	P	3	44		0.999088	1.10518e-05	118.57	110.17	118.57	0.19287	84427000	NaN	NaN	0.999088	NaN	NaN	118.57
A3KN83	1063	A3KN83	A3KN83	Protein strawberry notch homolog 1	SBNO1	IVMKSIVNLDSPMVSPPPDYPGEFFKDVRQG	15	P	3	44		0.500884	0.0299278	45.369	37.836	45.369	1.666	4635200	NaN	NaN	0.500884	NaN	NaN	45.369
A5YKK6	1460	A5YKK6	A5YKK6	CCR4-NOT transcription complex subunit 1	CNOT1	MRNLTAGMAMITCREPLLMSISTNLKNSFAS	18	P	3	56		1	0.00673069	45.784	35.802	45.784	0.10804	19073000	1	NaN	NaN	45.784	NaN	NaN
A5YKK6	2143	A5YKK6	A5YKK6	CCR4-NOT transcription complex subunit 1	CNOT1	LRNLILSAFPRNMRLPDPFTPNLKVDMLSEI	19	P	3	56		0.963448	0.0158106	68.689	62.256	68.689	-4.2052	26998000	NaN	NaN	0.963448	NaN	NaN	68.689
A6NHQ2	195	A6NHQ2	A6NHQ2	rRNA/tRNA 2'-O-methyltransferase fibrillarin-like protein 1	FBLL1	AASGTTVSHVSDIIGPDGLVYAVEFSHRAGR	25	P	4	70		1	0.0270198	40.764	30.154	40.764	-2.7717	111210000	1	NaN	NaN	40.764	NaN	NaN
A6NHR9	979	A6NHR9	A6NHR9	Structural maintenance of chromosomes flexible hinge domain-containing protein 1	SMCHD1	PKLIVHCKFSGAPNLPVYVVDCSSSGTSILT	26	P	3	72		0.854404	0.00434856	41.483	36.218	41.483	2.546	2082100	0.854404	NaN	NaN	41.483	NaN	NaN
A6NJ78	202	A6NJ78	A6NJ78	Probable methyltransferase-like protein 15	METTL15	RKDGPLDMRMDGGRYPDMPTAADVVNALDQQ	27	P	4	77		1	2.52502e-05	78.921	78.921	78.921	-2.7502	69448000	NaN	NaN	1	NaN	NaN	78.921
A6NJ78	205	A6NJ78	A6NJ78	Probable methyltransferase-like protein 15	METTL15	GPLDMRMDGGRYPDMPTAADVVNALDQQALA	28	P	4	77		1	0.00156773	78.921	78.921	78.921	-2.7502	30963000	NaN	NaN	1	NaN	NaN	78.921
A6NNZ2;P04350;P68371;Q13509;Q13885;Q3ZCM7;Q9BUF5;Q9BVA1	305;305;305;305;305;305;305;305	A6NNZ2;P04350;P68371;Q13509;Q13885;Q3ZCM7;Q9BUF5;Q9BVA1	P68371	Tubulin beta-8 chain-like protein LOC260334;Tubulin beta-4A chain;Tubulin beta-4B chain;Tubulin beta-3 chain;Tubulin beta-2A chain;Tubulin beta-8 chain;Tubulin beta-6 chain;Tubulin beta-2B chain	TUBB4A;TUBB4B;TUBB3;TUBB2A;TUBB8;TUBB6;TUBB2B	TQQMFDAKNMMAACDPRHGCYLTVAAIFRGR;TQQMFDAKNMMAACDPRHGRYLTAAAIFRGR;TQQMFDAKNMMAACDPRHGRYLTVAAVFRGR;TQQMFDAKNMMAACDPRHGRYLTVATVFRGR;TQQMFDARNMMAACDPRHGRYLTVATVFRGP;TQQMFDSKNMMAACDPRHGRYLTVAAIFRGR	33	P	2	1388;3076;3612;3678;4229;7499;7544;88		1	0.0349331	67.032	65.188	67.032	0.02122	0	1	NaN	NaN	67.032	NaN	NaN
E9PAV3	1386	E9PAV3	E9PAV3	Nascent polypeptide-associated complex subunit alpha, muscle-specific form	NACA	PPAATPSHKGGPAMTPPSPKRGPAIPSPKGD	62	P	4	237		0.770172	0.00737293	41.76	26.99	41.76	-3.2075	47814000	NaN	NaN	0.770172	NaN	NaN	41.76
O00116	126	O00116	O00116	Alkyldihydroxyacetonephosphate synthase, peroxisomal	AGPS	IELTGKRYPLSGMGLPTFKEWIQNTLGVNVE	64	P	3	245		0.998696	0.000513738	62.677	56.897	62.677	-4.2549	0	0.998696	NaN	NaN	62.677	NaN	NaN
O00139	259	O00139	O00139	Kinesin-like protein KIF2A	KIF2A	DVITIPSKDVVMVHEPKQKVDLTRYLENQTF	65	P	4	247		0.999145	0.00358878	61.102	50.962	61.102	0.289	2457100	NaN	NaN	0.999145	NaN	NaN	61.102
O00148	165	O00148	O00148	ATP-dependent RNA helicase DDX39A	DDX39A	GLSIKKDEEVLKKNCPHVVVGTPGRILALVR	68	P	3	248		1	0.00582348	77.597	62.395	74.698	0.63698	207870000	1	NaN	NaN	77.597	NaN	NaN
O00151	258	O00151	O00151	PDZ and LIM domain protein 1	PDLIM1	PVTKVAASIGNAQKLPMCDKCGTGIVGVFVK	71	P	2	249		1	8.0409e-09	150.49	133.27	116.71	1.159	95942000	1	NaN	1	150.49	NaN	101.04
O00178	581	O00178	O00178	GTP-binding protein 1	GTPBP1	AVGTITKLLQTTNNSPMNSKPQQIKMQSTKK	73	P	2	255		1	0.00024679	167.09	131.55	167.09	-0.43327	217590000	1	NaN	NaN	167.09	NaN	NaN
O00193	18	O00193	O00193	Small acidic protein	SMAP	AARESHPHGVKRSASPDDDLGSSNWEAADLG	74	P	2	259		1	0.0062451	53.828	47.797	53.828	-1.6031	43126000	1	NaN	1	50.851	NaN	53.828
O00203	640	O00203	O00203	AP-3 complex subunit beta-1	AP3B1	TLNIKATGYLELSNWPEVAPDPSVRNVEVIE	75	P	2	261		0.998905	0.015381	80.312	71.491	78.401	-2.9365	37387000	0.998905	NaN	NaN	80.312	NaN	NaN
O00203	644	O00203	O00203	AP-3 complex subunit beta-1	AP3B1	KATGYLELSNWPEVAPDPSVRNVEVIELAKE	76	P	2	261		0.952432	0.0173703	80.312	71.491	80.312	0.55875	37387000	0.952432	NaN	NaN	80.312	NaN	NaN
O00203	149	O00203	O00203	AP-3 complex subunit beta-1	AP3B1	SALRVLSSIRVPIIVPIMMLAIKEASADLSP	77	P	2	261		1	0.0141468	80.239	80.239	80.239	-0.92829	48762000	NaN	NaN	1	NaN	NaN	80.239
O00213	103	O00213	O00213	Amyloid beta A4 precursor protein-binding family B member 1	APBB1	NRNVTLTLAEEASQEPEMAPLGPKGLIHLYS	78	P	5	262		0.776088	0.00246983	42.828	40.738	42.828	1.6763	8800200	NaN	NaN	0.776088	NaN	NaN	42.828
O00267	667	O00267	O00267	Transcription elongation factor SPT5	SUPT5H	RDVTNFTVGGFAPMSPRISSPMHPSAGGQRG	82	P	2	274		0.71739	0.00550135	132.59	120.53	132.59	-0.38381	353270000	0.691508	NaN	0.71739	113.65	NaN	132.59
O00299	224	O00299	O00299	Chloride intracellular channel protein 1	CLIC1	YLSNAYAREEFASTCPDDEEIELAYEQVAKA	85	P	3	279		1	0.035163	44.105	42.867	44.105	-0.073416	9883700	1	NaN	NaN	44.105	NaN	NaN
O00410	159	O00410	O00410	Importin-5	IPO5	NVGLREAALHIFWNFPGIFGNQQQHYLDVIK	88	P	3	290		1	8.93003e-05	120.08	110.75	120.08	-3.9294	7831300	NaN	NaN	1	NaN	NaN	120.08
O00410	474	O00410	O00410	Importin-5	IPO5	QAHAAAALINFTEDCPKSLLIPYLDNLVKHL	91	P	3	290		1	0.00728662	60.542	56.701	55.589	0.77963	69668000	1	NaN	NaN	60.542	NaN	NaN
O00422	52	O00422	O00422	Histone deacetylase complex subunit SAP18	SAP18	NGRHHRMDEFSRGNVPSSELQIYTWMDATLK	96	P	2	293		1	0.000115693	75.463	64.995	75.463	-1.3105	57981000	0.99998	NaN	1	52.92	NaN	75.463
O00458	404	O00458	O00458	Interferon-related developmental regulator 1	IFRD1	LQSNEFLRNVFELGPPVMLDAATLKTMKISR	101	P	2	299		0.736201	0.00915214	121.86	112.32	121.86	-0.70077	41667000	NaN	NaN	0.736201	NaN	NaN	121.86
O00487	50	O00487	O00487	26S proteasome non-ATPase regulatory subunit 14	PSMD14	SLALLKMLKHGRAGVPMEVMGLMLGEFVDDY	102	P	2	312		1	0.00708857	65.172	54.228	65.172	-1.3949	60651000	1	NaN	NaN	65.172	NaN	NaN
O00592	541	O00592	O00592	Podocalyxin	PODXL	KVVSLNGELGDSWIVPLDNLTKDDLDEEEDT	108	P	3	328		1	0.0017988	64.152	55.265	64.152	-4.3953	0	NaN	NaN	1	NaN	NaN	64.152
O00762	142	O00762	O00762	Ubiquitin-conjugating enzyme E2 C	UBE2C	DVRTILLSIQSLLGEPNIDSPLNTHAAELWK	109	P	3	342		1	0.00961815	61.602	50.797	61.602	2.0157	32932000	1	NaN	NaN	61.602	NaN	NaN
O00762	147	O00762	O00762	Ubiquitin-conjugating enzyme E2 C	UBE2C	LLSIQSLLGEPNIDSPLNTHAAELWKNPTAF	110	P	3	342		1	0.000163363	65.301	60.984	61.602	2.0157	32932000	1	NaN	0.844617	61.602	NaN	65.301
O00764	284	O00764	O00764	Pyridoxal kinase	PDXK	RTIQCAKAQAGEGVRPSPMQLELRMVQSKRD	111	P	2	343		0.625494	0.00974888	85.845	60.408	85.845	1.8251	0	0.625494	NaN	NaN	85.845	NaN	NaN
O14497	1632	O14497	O14497	AT-rich interactive domain-containing protein 1A	ARID1A	GPPVPASHIAPAPVQPPMIRRDITFPPGSVE	112	P	3	347		0.528479	0.00129119	65.25	57.538	65.25	-0.019818	176320000	0.528479	NaN	0.521056	65.25	NaN	58.997
O14497	1213	O14497	O14497	AT-rich interactive domain-containing protein 1A	ARID1A	TFQKRNSMTPNPGYQPSMNTSDMMGRMSYEP	115	P	3	347		0.885719	0.00113897	49.125	49.125	49.125	-0.22779	39661000	NaN	NaN	0.885719	NaN	NaN	49.125
O14497	383	O14497	O14497	AT-rich interactive domain-containing protein 1A	ARID1A	GGGGQPLARTPQPSSPMDQMGKMRPQPYGGT	116	P	2	347		0.999681	0.000745143	134.75	134.75	134.75	-0.49904	59267000	NaN	NaN	0.999681	NaN	NaN	134.75
O14639	708	O14639	O14639	Actin-binding LIM protein 1	ABLIM1	DGHMPAMRMDRGVSMPNMLEPKIFPYEMLMV	121	P	2	370		0.990194	0.00343241	106.18	106.18	106.18	-0.080641	51725000	0.990194	NaN	0.980008	106.18	NaN	68.016
O14639	692	O14639	O14639	Actin-binding LIM protein 1	ABLIM1	SYGDVSGGVRDYQTLPDGHMPAMRMDRGVSM	122	P	6	370		0.839168	9.7004e-08	59.401	55.366	59.401	-0.3049	20878000	NaN	NaN	0.839168	NaN	NaN	59.401
O14686	3448	O14686	O14686	Histone-lysine N-methyltransferase 2D	KMT2D	KGIKKVMAQGSIGVAPGMNRQQVSLLAQRLS	133	P	2	385		1	0.00647377	69.261	55.827	69.261	0.009728	0	1	NaN	NaN	69.261	NaN	NaN
O14745	10	O14745	O14745	Na(+)/H(+) exchange regulatory cofactor NHE-RF1	SLC9A3R1	______MSADAAAGAPLPRLCCLEKGPNGYG	137	P	2	398		0.951004	0.00154652	72.23	49.449	72.23	2.3466	46790000	0.951004	NaN	NaN	72.23	NaN	NaN
O14787	471	O14787	O14787	Transportin-2	TNPO2	CWTLSRYAHWVVSQPPDMHLKPLMTELLKRI	141	P	6	409		0.942627	0.00484053	44.052	44.052	44.052	-0.022431	53367000	NaN	NaN	0.942627	NaN	NaN	44.052
O14874	266	O14874	O14874	[3-methyl-2-oxobutanoate dehydrogenase [lipoamide]] kinase, mitochondrial	BCKDK	RVRINGHVAARFPFIPMPLDYILPELLKNAM	144	P	2	418		0.993902	9.10721e-05	146.07	125.87	146.07	-0.17022	77844000	NaN	NaN	0.993902	NaN	NaN	146.07
O14917	826	O14917	O14917	Protocadherin-17	PCDH17	SEVMYLKPASNNLTVPQGHAGCHTSFTGQGT	148	P	5	425		0.522784	0.000159048	42.461	35.485	42.461	1.6535	29528000	0.522784	NaN	NaN	42.461	NaN	NaN
O14920	684	O14920	O14920	Inhibitor of nuclear factor kappa-B kinase subunit beta	IKBKB	VSGSPDSMNASRLSQPGQLMSQPSTASNSLP	149	P	3	426		0.9879	0.0260921	45.011	36.652	45.011	0.27395	38228000	NaN	NaN	0.9879	NaN	NaN	45.011
O14964	294	O14964	O14964	Hepatocyte growth factor-regulated tyrosine kinase substrate	HGS	RLRQKSTYTSYPKAEPMPSASSAPPASSLYS	150	P	3	435		0.826139	4.67275e-09	63.97	59.015	63.97	-1.3557	16012000	0.826139	NaN	NaN	63.97	NaN	NaN
O14980	1066	O14980	O14980	Exportin-1	XPO1	KRQMSVPGIFNPHEIPEEMCD__________	154	P	3	445		0.999489	0.000888536	67.274	67.274	46.702	-0.21528	832470000	0.999381	NaN	0.999489	56.54	NaN	67.274
O15027	2178	O15027	O15027	Protein transport protein Sec16A	SEC16A	TVQAAPPALPGPPGAPVNMYSRRAAGTRARY	164	P	3	452		0.97909	0.00509624	55.734	46.792	55.734	-0.28269	67981000	NaN	NaN	0.97909	NaN	NaN	55.734
O15042	457	O15042	O15042	U2 snRNP-associated SURP motif-containing protein	U2SURP	GPMFEAMIMNREINNPMFRFLFENQTPAHVY	171	P	4	457		0.999996	2.48746e-09	118.37	102.6	118.37	0.52954	175980000	NaN	NaN	0.999996	NaN	NaN	118.37
O15042	36	O15042	O15042	U2 snRNP-associated SURP motif-containing protein	U2SURP	VHSSGSSDAHMDASGPSDSDMPSRTRPKSPR	174	P	4	457		0.999003	0.00025876	58.722	58.722	43.895	-0.0029725	39533000	NaN	NaN	0.999003	NaN	NaN	58.722
O15042	42	O15042	O15042	U2 snRNP-associated SURP motif-containing protein	U2SURP	SDAHMDASGPSDSDMPSRTRPKSPRKHNYRN	175	P	4	457		0.500034	0.00346859	44.811	44.811	44.811	-0.15545	9794600	NaN	NaN	0.500034	NaN	NaN	44.811
O15056	1406	O15056	O15056	Synaptojanin-2	SYNJ2	SPDSDGTKAMKPEAAPLLGDYQDPFWNLLHH	180	P	5	460		0.59919	0.00420795	48.984	46.49	48.984	0.0039761	110720000	NaN	NaN	0.59919	NaN	NaN	48.984
O15067	314	O15067	O15067	Phosphoribosylformylglycinamidine synthase	PFAS	QGLRHVVFTAETHNFPTGVCPFSGATTGTGG	186	P	3	466		0.827654	0.00153183	53.475	50.542	53.475	-0.24148	28428000	0.827654	NaN	NaN	53.475	NaN	NaN
O15067	319	O15067	O15067	Phosphoribosylformylglycinamidine synthase	PFAS	VVFTAETHNFPTGVCPFSGATTGTGGRIRDV	187	P	4	466		0.702904	7.24986e-05	70.112	67.671	70.112	-0.80773	144540000	0.702904	NaN	NaN	70.112	NaN	NaN
O15067	157	O15067	O15067	Phosphoribosylformylglycinamidine synthase	PFAS	LATLHDRMTEQHFPHPIQSFSPESMPEPLNG	191	P	4	466		0.526732	5.10355e-05	53.819	44.598	53.819	2.5437	21421000	NaN	NaN	0.526732	NaN	NaN	53.819
O15067	832	O15067	O15067	Phosphoribosylformylglycinamidine synthase	PFAS	VRAPGSLVISAYAVCPDITATVTPDLKHPEG	192	P	3	466		0.997964	0.000335545	60.348	54.918	60.348	-1.3453	19263000	0.997964	NaN	NaN	60.348	NaN	NaN
O15143	180	O15143	O15143	Actin-related protein 2/3 complex subunit 1B	ARPC1B	KCRIFSAYIKEVEERPAPTPWGSKMPFGELM	198	P	4	486		0.711791	0.0342291	55.588	43.846	55.588	-0.6409	114350000	0.711791	NaN	NaN	55.588	NaN	NaN
O15143	182	O15143	O15143	Actin-related protein 2/3 complex subunit 1B	ARPC1B	RIFSAYIKEVEERPAPTPWGSKMPFGELMFE	199	P	4	486		0.644104	0.0342291	55.588	43.846	55.588	-0.6409	114350000	0.644104	NaN	NaN	55.588	NaN	NaN
O15143	184	O15143	O15143	Actin-related protein 2/3 complex subunit 1B	ARPC1B	FSAYIKEVEERPAPTPWGSKMPFGELMFESS	200	P	4	486		0.644104	0.0342291	55.588	43.846	55.588	-0.6409	114350000	0.644104	NaN	NaN	55.588	NaN	NaN
O15144	103	O15144	O15144	Actin-related protein 2/3 complex subunit 2	ARPC2	ESGYNVSLLYDLENLPASKDSIVHQAGMLKR	201	P	4	487		1	6.91034e-10	104.28	100.28	104.28	-0.090919	167660000	1	NaN	0.999975	104.28	NaN	68.333
O15294	700	O15294	O15294	UDP-N-acetylglucosamine--peptide N-acetylglucosaminyltransferase 110 kDa subunit	OGT	PAEVAEQYSEKLAYMPHTFFIGDHANMFPHL	209	P	5	518		0.987667	0.00396407	56.327	43.65	56.327	-0.62564	222410000	0.987667	NaN	NaN	56.327	NaN	NaN
O15294	324	O15294	O15294	UDP-N-acetylglucosamine--peptide N-acetylglucosaminyltransferase 110 kDa subunit	OGT	VAEAEDCYNTALRLCPTHADSLNNLANIKRE	210	P	3	518		1	0.000988015	82.102	71.617	82.102	-0.13481	18870000	1	NaN	NaN	82.102	NaN	NaN
O15327	497	O15327	O15327	Type II inositol 3,4-bisphosphate 4-phosphatase	INPP4B	LKKPPSPKSSTEESSPQDQPPVMRGQDSIPH	212	P	2	525		0.666604	0.0205506	44.132	18.414	44.132	2.9642	34694000	NaN	NaN	0.666604	NaN	NaN	44.132
O15327	501	O15327	O15327	Type II inositol 3,4-bisphosphate 4-phosphatase	INPP4B	PSPKSSTEESSPQDQPPVMRGQDSIPHHSDY	213	P	2	525		0.666604	0.0205506	44.132	18.414	44.132	2.9642	34694000	NaN	NaN	0.666604	NaN	NaN	44.132
O15327	502	O15327	O15327	Type II inositol 3,4-bisphosphate 4-phosphatase	INPP4B	SPKSSTEESSPQDQPPVMRGQDSIPHHSDYD	214	P	2	525		0.666604	0.0205506	44.132	18.414	44.132	2.9642	34694000	NaN	NaN	0.666604	NaN	NaN	44.132
O15355	413	O15355	O15355	Protein phosphatase 1G	PPM1G	RAIGDHFYKRNKNLPPEEQMISALPDIKVLT	218	P	3	530		0.80462	0.0259113	51.591	41.106	51.591	0.099988	152030000	0.80462	NaN	NaN	51.591	NaN	NaN
O15357	242	O15357	O15357	Phosphatidylinositol 3,4,5-trisphosphate 5-phosphatase 2	INPPL1	SGLEILSKVFDQQSSPMVTRLLQQQNLPQTG	219	P	2	531		1	0.00418057	134.84	115.87	134.84	-0.21937	12419000	NaN	NaN	1	NaN	NaN	134.84
O15371	22	O15371	O15371	Eukaryotic translation initiation factor 3 subunit D	EIF3D	PVIQDNPSGWGPCAVPEQFRDMPYQPFSKGD	220	P	3	534		0.78292	0.000229435	59.598	55.563	59.598	-0.57743	89068000	0.606428	NaN	0.78292	49.626	NaN	59.598
O15379	23	O15379	O15379	Histone deacetylase 3	HDAC3	FYDPDVGNFHYGAGHPMKPHRLALTHSLVLH	223	P	4	536		0.999554	0.0215427	40.381	36.854	40.381	-0.93578	8961000	0.999554	NaN	NaN	40.381	NaN	NaN
O15381	649	O15381	O15381	Nuclear valosin-containing protein-like	NVL	AVANESGLNFISVKGPELLNMYVGESERAVR	224	P	3	537		1	0.0170312	50.705	39.393	50.705	-0.33977	44117000	1	NaN	NaN	50.705	NaN	NaN
O15397	513	O15397	O15397	Importin-8	IPO8	AVELAKKSLIEDKEMPVKVEAALALQSLISN	229	P	4	541		1	0.00231223	50.144	44.6	50.144	-0.30272	13670000	1	NaN	NaN	50.144	NaN	NaN
O15431	107	O15431	O15431	High affinity copper uptake protein 1	SLC31A1	SLLRKSQVSIRYNSMPVPGPNGTILMETHKT	230	P	3	545		0.993732	0.000460212	85.231	81.843	85.231	0.53393	93695000	NaN	NaN	0.993732	NaN	NaN	85.231
O15446	482	O15446	O15446	DNA-directed RNA polymerase I subunit RPA34	CD3EAP	SQESRMPETVPQEEMPGPPLNSESGEEAPTG	233	P	3	548		0.602831	0.024675	47.919	41.759	47.919	-0.34099	12753000	NaN	NaN	0.602831	NaN	NaN	47.919
O15498	111	O15498	O15498	Synaptobrevin homolog YKT6	YKT6	KVLDEFSKQVDRIDWPVGSPATIHYPALDGH	234	P	6	552		0.993663	0.0010902	46.54	37.702	46.54	-4.4854	11438000	NaN	NaN	0.993663	NaN	NaN	46.54
O15511	117	O15511	O15511	Actin-related protein 2/3 complex subunit 5	ARPC5	GVDLLMKYIYKGFESPSDNSSAMLLQWHEKA	235	P	4	555		1	1.78838e-05	77.211	71.37	77.211	0.30447	64600000	NaN	NaN	1	NaN	NaN	77.211
O43143	763	O43143	O43143	Pre-mRNA-splicing factor ATP-dependent RNA helicase DHX15	DHX15	RTCTDIKPEWLVKIAPQYYDMSNFPQCEAKR	237	P	3	568		0.999354	0.0239399	50.653	47.265	50.653	-0.44157	138660000	0.999354	NaN	0.998626	50.653	NaN	47.548
O43149	1878	O43149	O43149	Zinc finger ZZ-type and EF-hand domain-containing protein 1	ZZEF1	KYSYGHLPTHSITAHPMVTIRISDRQRLIQP	239	P	5	570		0.999923	0.00481789	57.496	48.212	55.007	0.15406	224130000	0.999923	NaN	0.935588	57.496	NaN	41.257
O43164	47	O43164	O43164	E3 ubiquitin-protein ligase Praja-2	PJA2	TGRRYGRRHAYVSFKPCMTRHERSLGRAGDD	240	P	3	576		1	0.0141773	93.011	63.204	93.011	-0.28335	40158000	NaN	NaN	1	NaN	NaN	93.011
O43175	99	O43175	O43175	D-3-phosphoglycerate dehydrogenase	PHGDH	DLEAATRKGILVMNTPNGNSLSAAELTCGMI	241	P	3	581		1	0.000553753	45.862	39.767	45.862	-0.098745	7071500	NaN	NaN	1	NaN	NaN	45.862
O43175	475	O43175	O43175	D-3-phosphoglycerate dehydrogenase	PHGDH	RRDLPLLLFRTQTSDPAMLPTMIGLLAEAGV	244	P	3	581		1	0.019256	65.943	46.62	41.482	-1.9402	150660000	1	0	1	65.943	NaN	41.482
O43181	120	O43181	O43181	NADH dehydrogenase [ubiquinone] iron-sulfur protein 4, mitochondrial	NDUFS4	ERWENPLMGWASTADPLSNMVLTFSTKEDAV	246	P	4	582		0.918125	9.48539e-06	50.85	50.85	50.85	-0.51294	37807000	NaN	NaN	0.918125	NaN	NaN	50.85
O43242	133	O43242	O43242	26S proteasome non-ATPase regulatory subunit 3	PSMD3	QGFFTSNNATRDFLLPFLEEPMDTEADLQFR	248	P	3	586		0.665997	5.4694e-09	123.82	119.01	52.198	0.15914	253380000	NaN	NaN	0.665997	NaN	NaN	123.82
O43242	359	O43242	O43242	26S proteasome non-ATPase regulatory subunit 3	PSMD3	DRLQFRQPSLKRSLMPYFLLTQAVRTGNLAK	250	P	3	586		1	0.00279387	87.719	73.69	87.719	-0.53335	11672000	1	NaN	1	87.719	NaN	54.343
O43252	550	O43252	O43252	Bifunctional 3'-phosphoadenosine 5'-phosphosulfate synthase 1;Sulfate adenylyltransferase;Adenylyl-sulfate kinase	PAPSS1	DLYEPSHGAKVLTMAPGLITLEIVPFRVAAY	253	P	2	588		0.999997	0.0139369	66.262	53.495	66.262	-0.71344	1833100	NaN	NaN	0.999997	NaN	NaN	66.262
O43264	51	O43264	O43264	Centromere/kinetochore protein zw10 homolog	ZW10	GEVCNMISKKYSEFLPSMQSAQGLITQVDKL	254	P	3	590		1	0.000126725	116.87	112.01	116.87	-0.75091	330550000	1	NaN	1	116.87	NaN	109.25
O43290	567	O43290	O43290	U4/U6.U5 tri-snRNP-associated protein 1	SART1	VFNATSEFCRTLGEIPTYGLAGNREEQEELM	259	P	4	593		1	0.00688473	46.296	36.149	46.296	-0.76425	49487000	NaN	NaN	1	NaN	NaN	46.296
O43395	134	O43395	O43395	U4/U6 small nuclear ribonucleoprotein Prp3	PRPF3	VEEEPEVIPGPPSESPGMLTKLQIKQMMEAA	270	P	2	615		0.956704	0.0299189	72.433	62.152	72.433	-0.063074	6274000	NaN	NaN	0.956704	NaN	NaN	72.433
O43395	221	O43395	O43395	U4/U6 small nuclear ribonucleoprotein Prp3	PRPF3	AAELQARIQAQLALKPGLIGNANMVGLANLH	271	P	4	615		0.99882	0.00183839	45.558	45.558	42.347	-1.6366	68298000	0.99882	NaN	NaN	45.558	NaN	NaN
O43524	515	O43524	O43524	Forkhead box protein O3	FOXO3	VSAQNSRRNVMLRNDPMMSFAAQPNQGSLVN	277	P	5	640		0.995738	3.04445e-07	74.397	74.397	74.397	0.1762	42118000	0.995738	NaN	NaN	74.397	NaN	NaN
O43660	59	O43660	O43660	Pleiotropic regulator 1	PLRG1	MAIKLRNEYGPVLHMPTSKENLKEKGPQNAT	278	P	4	657		0.972604	0.02086	51.695	44.287	51.695	-0.21693	9030900	0.972604	NaN	NaN	51.695	NaN	NaN
O43663	87	O43663	O43663	Protein regulator of cytokinesis 1	PRC1	CQKELNTLCSELHVEPFQEEGETTILQLEKD	285	P	3	658		1	0.00917189	45.957	42.196	45.957	-0.51665	8510000	1	NaN	NaN	45.957	NaN	NaN
O43681	140	O43681	O43681	ATPase ASNA1	ASNA1	LSMGKKMMQEAMSAFPGIDEAMSYAEVMRLV	288	P	3	665		1	0.000229887	57.147	56.96	57.147	0.39996	18313000	NaN	NaN	1	NaN	NaN	57.147
O43707	616	O43707	O43707	Alpha-actinin-4	ACTN4	NHIKLSGSNPYTTVTPQIINSKWEKVQQLVP	291	P	2	668		1	0.000869881	94.507	71.389	94.507	-3.0902	0	NaN	NaN	1	NaN	NaN	94.507
O43707	252	O43707	O43707	Alpha-actinin-4	ACTN4	IPKMLDAEDIVNTARPDEKAIMTYVSSFYHA	292	P	4	668		1	0.000580207	49.001	43.416	49.001	-2.9346	46261000	NaN	NaN	1	NaN	NaN	49.001
O43768	83	O43768	O43768	Alpha-endosulfine	ENSA	GDYNMAKAKMKNKQLPSAGPDKNLVTGDHIP	295	P	5	684		0.877365	0.027701	45.862	30.343	45.862	0.85188	51978000	NaN	NaN	0.877365	NaN	NaN	45.862
O43768	87	O43768	O43768	Alpha-endosulfine	ENSA	MAKAKMKNKQLPSAGPDKNLVTGDHIPTPQD	296	P	5	684		0.877109	0.027701	45.862	30.343	45.862	0.85188	51978000	NaN	NaN	0.877109	NaN	NaN	45.862
O43776	467	O43776	O43776	Asparagine--tRNA ligase, cytoplasmic	NARS	CPEDSRLTESVDVLMPNVGEIVGGSMRIFDS	297	P	2	686		1	1.47321e-10	143.93	124.73	143.93	-0.73641	30615000	1	NaN	NaN	143.93	NaN	NaN
O43776	512	O43776	O43776	Asparagine--tRNA ligase, cytoplasmic	NARS	TPYYWYTDQRKYGTCPHGGYGLGLERFLTWI	298	P	3	686		1	0.0304705	52.522	49.235	52.522	-0.5091	28743000	1	NaN	NaN	52.522	NaN	NaN
O43824	406	O43824	O43824	Putative GTP-binding protein 6	GTPBP6	LQKCSVLSTLRGLQLPAPLLDSMVEVHNKVD	301	P	4	698		0.513879	3.02597e-07	58.421	54.5	49.585	-1.2551	486850000	0.513879	0	0.489809	49.585	NaN	58.421
O43837	118	O43837	O43837	Isocitrate dehydrogenase [NAD] subunit beta, mitochondrial	IDH3B	SMKENKVAIIGKIHTPMEYKGELASYDMRLR	303	P	5	701		1	0.00144668	79.393	76.055	46.131	0.23476	146280000	NaN	NaN	1	NaN	NaN	79.393
O43837	50	O43837	O43837	Isocitrate dehydrogenase [NAD] subunit beta, mitochondrial	IDH3B	ASRSQAEDVRVEGSFPVTMLPGDGVGPELMH	305	P	5	701		0.993908	6.76666e-06	88.241	82.37	88.241	-0.69056	187750000	NaN	NaN	0.993908	NaN	NaN	88.241
O60216	448	O60216	O60216	Double-strand-break repair protein rad21 homolog	RAD21	QHQQRDVIDEPIIEEPSRLQESVMEASRTNI	310	P	3	714		0.99999	9.80948e-08	112.37	100.29	112.37	-0.8602	625540000	0.999781	NaN	0.99999	79.783	NaN	112.37
O60232	145	O60232	O60232	Sjoegren syndrome/scleroderma autoantigen 1	SSSCA1	AGLKAAQGPPAPAVPPNTDVMACTQTALLQK	313	P	3	717		0.855027	0.000420835	68.231	53.103	68.231	-0.59129	28358000	0.855027	NaN	NaN	68.231	NaN	NaN
O60232	15	O60232	O60232	Sjoegren syndrome/scleroderma autoantigen 1	SSSCA1	_MALNGAEVDDFSWEPPTEAETKVLQARRER	314	P	2	717		0.756108	0.000450761	59.864	50.577	59.864	-4.3045	7627700	NaN	NaN	0.756108	NaN	NaN	59.864
O60244	1155	O60244	O60244	Mediator of RNA polymerase II transcription subunit 14	MED14	DASHSPRAGTSSQTMPTNMPPPRKLPQRSWA	317	P	2	722		0.995304	1.83154e-05	138.63	115.71	138.63	0.046181	0	0.995304	NaN	NaN	138.63	NaN	NaN
O60244	1237	O60244	O60244	Mediator of RNA polymerase II transcription subunit 14	MED14	RIIQQETLQLINSNEPGVIMFKTDALKCRVA	318	P	4	722		1	0.00653149	46.862	41.26	46.862	0.057364	35629000	NaN	NaN	1	NaN	NaN	46.862
O60264	470	O60264	O60264	SWI/SNF-related matrix-associated actin-dependent regulator of chromatin subfamily A member 5	SMARCA5	KCCNHPYLFDGAEPGPPYTTDMHLVTNSGKM	321	P	4	726		0.548311	8.6873e-05	87.489	85.607	87.489	-1.2317	50551000	0.548311	NaN	NaN	87.489	NaN	NaN
O60264	733	O60264	O60264	SWI/SNF-related matrix-associated actin-dependent regulator of chromatin subfamily A member 5	SMARCA5	DYREKQKIAFTEWIEPPKRERKANYAVDAYF	322	P	3	726		1	0.0093026	75.819	60.275	75.819	0.16719	140500000	1	NaN	NaN	75.819	NaN	NaN
O60264	734	O60264	O60264	SWI/SNF-related matrix-associated actin-dependent regulator of chromatin subfamily A member 5	SMARCA5	YREKQKIAFTEWIEPPKRERKANYAVDAYFR	323	P	3	726		1	0.0093026	75.819	60.275	75.819	0.16719	140500000	1	NaN	NaN	75.819	NaN	NaN
O60271	349	O60271	O60271	C-Jun-amino-terminal kinase-interacting protein 4	SPAG9	ENEEKSEVQAIIESTPELDMDKDLSGYKGSS	324	P	4	729		1	0.00302028	48.085	43.81	48.085	-0.0088918	17418000	NaN	NaN	1	NaN	NaN	48.085
O60306	7	O60306	O60306	Intron-binding protein aquarius	AQR	_________MAAPAQPKKIVAPTVSQINAEF	329	P	1	741		0.99791	0.0358193	42.229	10.939	42.229	0.82357	32603000	0.99791	NaN	NaN	42.229	NaN	NaN
O60306	525	O60306	O60306	Intron-binding protein aquarius	AQR	MAQPIVAFTVVEVAKPNIGENWPTRVRADVT	330	P	3	741		1	0.000266213	73.981	67.257	73.981	0.10032	78189000	1	NaN	NaN	73.981	NaN	NaN
O60306	532	O60306	O60306	Intron-binding protein aquarius	AQR	FTVVEVAKPNIGENWPTRVRADVTINLNVRD	331	P	3	741		1	0.000266213	73.981	67.257	73.981	0.10032	78189000	1	NaN	NaN	73.981	NaN	NaN
O60306	494	O60306	O60306	Intron-binding protein aquarius	AQR	YEIRQDIEDSVSRMKPWQSEYGGVVFGGWAR	332	P	3	741		1	0.0156948	71.601	63	71.601	-0.93388	75582000	1	NaN	NaN	71.601	NaN	NaN
O60341	105	O60341	O60341	Lysine-specific histone demethylase 1A	KDM1A	VPGSATPMETGIAETPEGRRTSRRKRAKVEY	335	P	4	750		0.842767	5.84223e-05	48.08	40.543	48.08	0.66749	159630000	NaN	NaN	0.842767	NaN	NaN	48.08
O60341	152	O60341	O60341	Lysine-specific histone demethylase 1A	KDM1A	SEEERNAKAEKEKKLPPPPPQAPPEEENESE	337	P	3	750		0.698501	0.00501276	43.24	41.713	43.24	-1.0677	51582000	0.698501	NaN	0.678031	43.24	NaN	42.571
O60341	153	O60341	O60341	Lysine-specific histone demethylase 1A	KDM1A	EEERNAKAEKEKKLPPPPPQAPPEEENESEP	338	P	3	750		0.680387	0.00501276	43.24	41.713	43.24	-1.0677	51582000	0.680387	NaN	0.659621	43.24	NaN	42.571
O60341	154	O60341	O60341	Lysine-specific histone demethylase 1A	KDM1A	EERNAKAEKEKKLPPPPPQAPPEEENESEPE	339	P	3	750		0.676257	0.00501276	43.24	41.713	43.24	-1.0677	51582000	0.676257	NaN	0.654849	43.24	NaN	42.571
O60341	155	O60341	O60341	Lysine-specific histone demethylase 1A	KDM1A	ERNAKAEKEKKLPPPPPQAPPEEENESEPEE	340	P	3	750		0.675824	0.00501276	43.24	41.713	43.24	-1.0677	51582000	0.675824	NaN	0.654184	43.24	NaN	42.571
O60341	156	O60341	O60341	Lysine-specific histone demethylase 1A	KDM1A	RNAKAEKEKKLPPPPPQAPPEEENESEPEEP	341	P	3	750		0.675824	0.00501276	43.24	41.713	43.24	-1.0677	51582000	0.675824	NaN	0.654184	43.24	NaN	42.571
O60341	159	O60341	O60341	Lysine-specific histone demethylase 1A	KDM1A	KAEKEKKLPPPPPQAPPEEENESEPEEPSGV	342	P	3	750		0.675824	0.00501276	43.24	41.713	43.24	-1.0677	51582000	0.675824	NaN	0.654184	43.24	NaN	42.571
O60341	160	O60341	O60341	Lysine-specific histone demethylase 1A	KDM1A	AEKEKKLPPPPPQAPPEEENESEPEEPSGVE	343	P	3	750		0.675824	0.00501276	43.24	41.713	43.24	-1.0677	51582000	0.675824	NaN	0.654184	43.24	NaN	42.571
O60343	53	O60343	O60343	TBC1 domain family member 4	TBC1D4	LWYVGGSCLDHRTTLPMLPWLMAEIRRRSQK	344	P	2	751		0.996136	0.00236473	97.911	97.911	97.911	-0.12228	40191000	NaN	NaN	0.996136	NaN	NaN	97.911
O60518	10	O60518	O60518	Ran-binding protein 6	RANBP6	______MAATASAGVPATVSEKQEFYQLLKN	356	P	2	774		1	0.00781786	61.353	36.499	61.353	-1.399	146630000	1	NaN	NaN	61.353	NaN	NaN
O60563	605	O60563	O60563	Cyclin-T1	CCNT1	KIAKSTKSSSLNFSFPSLPTMGQMPGHSSDT	358	P	3	779		0.610904	1.39117e-07	74.282	70.982	74.282	-1.3309	38218000	0.610904	NaN	0.472361	74.282	NaN	51.444
O60573	104	O60573	O60573	Eukaryotic translation initiation factor 4E type 2	EIF4E2	ASVEQFWRFYSHMVRPGDLTGHSDFHLFKEG	362	P	5	782		1	6.22528e-05	79.568	71.946	79.568	-0.45778	53702000	1	NaN	NaN	79.568	NaN	NaN
O60664	413	O60664	O60664	Perilipin-3	PLIN3	REALDHMVEYVAQNTPVTWLVGPFAPGITEK	363	P	3	792		0.991954	0.0081747	50.705	45.385	50.705	-4.16	0	NaN	NaN	0.991954	NaN	NaN	50.705
O60716	160	O60716	O60716	Catenin delta-1	CTNND1	VKTVTTRTVQPVAMGPDGLPVDASSVSNNYI	366	P	4	802		0.572232	0.00707591	40.064	36.105	40.064	0.76494	19832000	NaN	0	0.572232	NaN	NaN	40.064
O60739;P41567	77;77	O60739;P41567	P41567	Eukaryotic translation initiation factor 1b;Eukaryotic translation initiation factor 1	EIF1B;EIF1	AFKKKFACNGTVIEHPEYGEVIQLQGDQRKN	368	P	4	2355;805		1	0.0142196	45.011	42.955	45.011	-0.3393	33129000	1	NaN	NaN	45.011	NaN	NaN
O60762	41	O60762	O60762	Dolichol-phosphate mannosyltransferase subunit 1	DPM1	KYSVLLPTYNERENLPLIVWLLVKSFSESGI	369	P	2	807		0.990911	0.0139857	63.16	57.5	63.16	-2.985	0	NaN	NaN	0.990911	NaN	NaN	63.16
O60763	261	O60763	O60763	General vesicular transport factor p115	USO1	NQNFFKEGSYIQRMKPWFEVGDENSGWSAQK	371	P	2	808		1	0.0118163	67.275	56.329	67.275	-2.3594	0	1	NaN	NaN	67.275	NaN	NaN
O60828	206	O60828	O60828	Polyglutamine-binding protein 1	PQBP1	KKAVSRKDEELDPMDPSSYSDAPRGTWSTGL	376	P	4	816		0.549888	0.0179986	44.052	36.837	44.052	2.1889	73381000	NaN	NaN	0.549888	NaN	NaN	44.052
O60830;Q99595	8;8	O60830;Q99595	O60830	Mitochondrial import inner membrane translocase subunit Tim17-B;Mitochondrial import inner membrane translocase subunit Tim17-A	TIMM17B;TIMM17A	________MEEYAREPCPWRIVDDCGGAFTM	377	P	2	7235;817		1	0.00924906	51.436	45.195	42.336	-0.98157	98811000	1	NaN	NaN	51.436	NaN	NaN
O60830;Q99595	10;10	O60830;Q99595	O60830	Mitochondrial import inner membrane translocase subunit Tim17-B;Mitochondrial import inner membrane translocase subunit Tim17-A	TIMM17B;TIMM17A	______MEEYAREPCPWRIVDDCGGAFTMGT;______MEEYAREPCPWRIVDDCGGAFTMGV	378	P	2	7235;817		1	0.00924906	51.436	45.195	42.336	-0.98157	98811000	1	NaN	NaN	51.436	NaN	NaN
O60832	97	O60832	O60832	H/ACA ribonucleoprotein complex subunit 4	DKC1	EIGDYIRTGFINLDKPSNPSSHEVVAWIRRI	380	P	4	819		1	0.0288071	53.342	41.028	53.342	2.2171	63639000	1	NaN	NaN	53.342	NaN	NaN
O60832	100	O60832	O60832	H/ACA ribonucleoprotein complex subunit 4	DKC1	DYIRTGFINLDKPSNPSSHEVVAWIRRILRV	381	P	4	819		1	0.0288071	53.342	41.028	53.342	2.2171	63639000	1	NaN	NaN	53.342	NaN	NaN
O60832	78	O60832	O60832	H/ACA ribonucleoprotein complex subunit 4	DKC1	NVRTTHYTPLACGSNPLKREIGDYIRTGFIN	382	P	3	819		0.996185	0.0202876	57.434	53.192	57.434	0.33569	111750000	0.996185	NaN	NaN	57.434	NaN	NaN
O60841	696	O60841	O60841	Eukaryotic translation initiation factor 5B	EIF5B	QTKMIKNFDRENVRIPGMLIIDTPGHESFSN	385	P	3	820		0.999997	9.29042e-05	76.155	71.754	76.155	0.069841	1464300000	0.999965	NaN	0.999997	74.748	NaN	76.155
O60885	531	O60885	O60885	Bromodomain-containing protein 4	BRD4	EQLKAVHEQLAALSQPQQNKPKKKEKDKKEK	386	P	4	826		1	0.0105913	100.55	88.575	48.477	0.13585	111680000	1	0	1	63.337	NaN	100.55
O75027	182	O75027	O75027	ATP-binding cassette sub-family B member 7, mitochondrial	ABCB7	SLNQMSGNMLNLSDAPNTVATMATAVLIGYG	391	P	3	841		1	0.000279148	44.369	39.512	44.369	-0.64572	10409000	1	NaN	NaN	44.369	NaN	NaN
O75143	381	O75143	O75143	Autophagy-related protein 13	ATG13	LETIFVRKVGAFVNKPINQVTLTSLDIPFAM	398	P	3	869		0.999931	0.0151463	40.669	21.95	40.669	-1.2742	72845000	0.999931	NaN	NaN	40.669	NaN	NaN
O75143	393	O75143	O75143	Autophagy-related protein 13	ATG13	VNKPINQVTLTSLDIPFAMFAPKNLELEDTD	399	P	3	869		0.500034	0.0151463	40.669	21.95	40.669	-1.2742	72845000	0.500034	NaN	NaN	40.669	NaN	NaN
O75143	399	O75143	O75143	Autophagy-related protein 13	ATG13	QVTLTSLDIPFAMFAPKNLELEDTDPMVNPP	400	P	3	869		0.500034	0.0151463	40.669	21.95	40.669	-1.2742	72845000	0.500034	NaN	NaN	40.669	NaN	NaN
O75155	371	O75155	O75155	Cullin-associated NEDD8-dissociated protein 2	CAND2	AKCIAALISSRPDLLPDFHCTLAPVLIRRFK	408	P	3	879		0.99823	0.0294918	44.196	27.797	44.196	2.0789	318300000	0.99823	NaN	NaN	44.196	NaN	NaN
O75155	379	O75155	O75155	Cullin-associated NEDD8-dissociated protein 2	CAND2	SSRPDLLPDFHCTLAPVLIRRFKEREENVKA	409	P	3	879		0.999655	0.0294918	44.196	27.797	44.196	2.0789	318300000	0.999655	NaN	NaN	44.196	NaN	NaN
O75164	982	O75164	O75164	Lysine-specific demethylase 4A	KDM4A	WTDGQVYGAKFVASHPIQMYQVEFEDGSQLV	410	P	3	882		1	0.00019941	74.584	69.131	74.584	0.33126	20069000	1	NaN	NaN	74.584	NaN	NaN
O75170	438	O75170	O75170	Serine/threonine-protein phosphatase 6 regulatory subunit 2	PPP6R2	NGNRSLETPQPAASLPDNTMVTHLFQKCCLV	411	P	3	885		0.904849	0.00860358	50.055	42.609	50.055	-0.8066	69235000	0.904849	NaN	NaN	50.055	NaN	NaN
O75306	229	O75306	O75306	NADH dehydrogenase [ubiquinone] iron-sulfur protein 2, mitochondrial	NDUFS2	YERVSGARMHAAYIRPGGVHQDLPLGLMDDI	418	P	5	901		0.986656	0.00950168	100.42	100.42	100.42	0.045507	317460000	0.986656	NaN	NaN	100.42	NaN	NaN
O75323	196	O75323	O75323	Protein NipSnap homolog 2	GBAS	RSGPNIYELRSYQLRPGTMIEWGNYWARAIR	423	P	3	905		1	3.28532e-09	166.76	150.04	155.03	0.048536	882000000	1	NaN	1	166.76	NaN	155.03
O75369	1273	O75369	O75369	Filamin-B	FLNB	LTQVGGDHIKAHIANPSGASTECFVTDNADG	424	P	3	918		0.98756	0.00563809	41.434	33.791	41.434	0.19199	34950000	0.98756	NaN	NaN	41.434	NaN	NaN
O75369	2159	O75369	O75369	Filamin-B	FLNB	EIVPMGKNSHCVRFVPQEMGVHTVSVKYRGQ	425	P	3	918		1	0.0300039	57.136	43.999	57.136	0.32885	53849000	NaN	NaN	1	NaN	NaN	57.136
O75369	1989	O75369	O75369	Filamin-B	FLNB	HLVSIKKNGNHVANSPVSIMVVQSEIGDARR	427	P	3	918		1	0.0270388	44.258	37.38	44.258	-1.7741	0	NaN	NaN	1	NaN	NaN	44.258
O75369	1163	O75369	O75369	Filamin-B	FLNB	VGEAGLLSVDCSEAGPGALGLEAVSDSGTKA	428	P	3	918		1	2.25313e-05	71.608	66.343	71.608	-0.97212	17738000	1	NaN	NaN	71.608	NaN	NaN
O75369	2444	O75369	O75369	Filamin-B	FLNB	MDCQETPEGYKVMYTPMAPGNYLISVKYGGP	429	P	2	918		0.990456	0.0138775	62.258	47.115	62.258	0.52969	0	0.990456	NaN	NaN	62.258	NaN	NaN
O75369	912	O75369	O75369	Filamin-B	FLNB	DIIDNYDYSHTVKYTPTQQGNMQVLVTYGGD	430	P	2	918		0.999998	0.000657427	87.66	76.046	87.66	0.36078	132200000	0.999998	NaN	0.999995	87.66	NaN	62.19
O75390	148	O75390	O75390	Citrate synthase, mitochondrial	CS	QVSWLSKEWAKRAALPSHVVTMLDNFPTNLH	433	P	4	926		0.994806	5.04678e-07	68.101	60.606	68.101	0.76189	89303000	0.367091	NaN	0.994806	52.155	NaN	68.101
O75396	104	O75396	O75396	Vesicle-trafficking protein SEC22b	SEC22B	EDLHSEFDEQHGKKVPTVSRPYSFIEFDTFI	437	P	2	929		1	0.0205465	81.494	6.734	81.494	-0.98948	33576000	NaN	NaN	1	NaN	NaN	81.494
O75396	109	O75396	O75396	Vesicle-trafficking protein SEC22b	SEC22B	EFDEQHGKKVPTVSRPYSFIEFDTFIQKTKK	438	P	2	929		1	0.0205465	81.494	6.734	81.494	-0.98948	33576000	NaN	NaN	1	NaN	NaN	81.494
O75431	150	O75431	O75431	Metaxin-2	MTX2	ATVGEITHARYGSPYPWPLNHILAYQKQWEV	442	P	3	938		0.991988	0.00205299	61.265	56.286	61.265	1.2399	71649000	0.991988	NaN	NaN	61.265	NaN	NaN
O75431	152	O75431	O75431	Metaxin-2	MTX2	VGEITHARYGSPYPWPLNHILAYQKQWEVKR	443	P	3	938		0.965036	0.00205299	61.265	56.286	61.265	1.2399	71649000	0.965036	NaN	NaN	61.265	NaN	NaN
O75449	228	O75449	O75449	Katanin p60 ATPase-containing subunit A1	KATNA1	DLVEAKKLLKEAVVLPMWMPEFFKGIRRPWK	447	P	2	945		0.988072	0.00532048	87.568	87.568	87.568	-0.24487	53980000	NaN	NaN	0.988072	NaN	NaN	87.568
O75489	238	O75489	O75489	NADH dehydrogenase [ubiquinone] iron-sulfur protein 3, mitochondrial	NDUFS3	PVELAQEFRKFDLNSPWEAFPVYRQPPESLK	449	P	4	956		0.999975	0.00484976	58.272	48.417	58.272	-0.32545	241490000	0.999975	NaN	NaN	58.272	NaN	NaN
O75489	243	O75489	O75489	NADH dehydrogenase [ubiquinone] iron-sulfur protein 3, mitochondrial	NDUFS3	QEFRKFDLNSPWEAFPVYRQPPESLKLEAGD	450	P	4	956		0.998963	0.00484976	58.272	48.417	58.272	-0.32545	241490000	0.998963	NaN	NaN	58.272	NaN	NaN
O75525	7	O75525	O75525	KH domain-containing, RNA-binding, signal transduction-associated protein 3	KHDRBS3	_________MEEKYLPELMAEKDSLDPSFTH	451	P	4	962		0.999837	0.000617485	55.67	53.294	55.67	-0.082728	305670000	0.999837	NaN	NaN	55.67	NaN	NaN
O75533	780	O75533	O75533	Splicing factor 3B subunit 1	SF3B1	YTREVMLILIREFQSPDEEMKKIVLKVVKQC	455	P	3	967		1	0.0013704	88.551	68.998	88.551	-3.5039	0	NaN	NaN	1	NaN	NaN	88.551
O75534	397	O75534	O75534	Cold shock domain-containing protein E1	CSDE1	GNQLHIADEVEFTVVPDMLSAQRNHAIRIKK	462	P	3	968		1	7.72722e-10	124.66	120.21	124.66	-0.37543	100060000	NaN	NaN	1	NaN	NaN	124.66
O75534	610	O75534	O75534	Cold shock domain-containing protein E1	CSDE1	TIYSGKVIRPLRSVDPTQTEYQGMIEIVEEG	463	P	3	968		1	0.000201578	73.315	71.794	73.315	-1.085	42222000	1	NaN	1	63.184	NaN	73.315
O75643	590	O75643	O75643	U5 small nuclear ribonucleoprotein 200 kDa helicase	SNRNP200	LCKEEISATQIIVCTPEKWDIITRKGGERTY	470	P	2	985		1	0.0115536	118.23	98.471	118.23	-0.29766	53653000	1	NaN	NaN	118.23	NaN	NaN
O75643	354	O75643	O75643	U5 small nuclear ribonucleoprotein 200 kDa helicase	SNRNP200	SEAEKERIMGKMEADPELSKFLYQLHETEKE	474	P	4	985		1	0.00354224	50.851	44.202	50.851	-0.26375	44677000	NaN	NaN	1	NaN	NaN	50.851
O75691	661	O75691	O75691	Small subunit processome component 20 homolog	UTP20	RLLTIRILNHFDVQLPESMEDDGLSERQSVF	480	P	2	994		1	0.00263028	85.734	72.597	85.734	-1.4138	11681000	1	NaN	NaN	85.734	NaN	NaN
O75694	990	O75694	O75694	Nuclear pore complex protein Nup155	NUP155	ITDTLQELVNQSKAAPQSPSVPKKPGPPVLS	481	P	5	995		0.806473	0.00116663	43.831	39.91	43.831	-2.5815	32419000	NaN	NaN	0.806473	NaN	NaN	43.831
O75694	993	O75694	O75694	Nuclear pore complex protein Nup155	NUP155	TLQELVNQSKAAPQSPSVPKKPGPPVLSSDP	482	P	5	995		0.806473	0.00116663	43.831	39.91	43.831	-2.5815	32419000	NaN	NaN	0.806473	NaN	NaN	43.831
O75694	996	O75694	O75694	Nuclear pore complex protein Nup155	NUP155	ELVNQSKAAPQSPSVPKKPGPPVLSSDPNML	483	P	5	995		0.806473	0.00116663	43.831	39.91	43.831	-2.5815	32419000	NaN	NaN	0.806473	NaN	NaN	43.831
O75694	999	O75694	O75694	Nuclear pore complex protein Nup155	NUP155	NQSKAAPQSPSVPKKPGPPVLSSDPNMLSNE	484	P	5	995		0.806473	0.00116663	43.831	39.91	43.831	-2.5815	32419000	NaN	NaN	0.806473	NaN	NaN	43.831
O75694	1001	O75694	O75694	Nuclear pore complex protein Nup155	NUP155	SKAAPQSPSVPKKPGPPVLSSDPNMLSNEEA	485	P	5	995		0.806473	0.00116663	43.831	39.91	43.831	-2.5815	32419000	NaN	NaN	0.806473	NaN	NaN	43.831
O75694	1002	O75694	O75694	Nuclear pore complex protein Nup155	NUP155	KAAPQSPSVPKKPGPPVLSSDPNMLSNEEAG	486	P	5	995		0.806473	0.00116663	43.831	39.91	43.831	-2.5815	32419000	NaN	NaN	0.806473	NaN	NaN	43.831
O75694	1008	O75694	O75694	Nuclear pore complex protein Nup155	NUP155	PSVPKKPGPPVLSSDPNMLSNEEAGHHFEQM	487	P	4	995		0.992447	0.000392055	58.858	52.494	58.858	0.28427	66116000	NaN	NaN	0.992447	NaN	NaN	58.858
O75694	497	O75694	O75694	Nuclear pore complex protein Nup155	NUP155	PITDSPVVVQQHMLPPKKFVLLSAQGSLMFH	488	P	5	995		0.534528	7.38969e-05	80.07	76.783	78.837	0.17007	49548000	0.534528	NaN	NaN	80.07	NaN	NaN
O75717	370	O75717	O75717	WD repeat and HMG-box DNA-binding protein 1	WDHD1	NDDEDDEDLMMASGRPRQRSHILEDDENSVD	494	P	3	998		1	0.00720446	58.997	56.031	58.997	-0.34471	115420000	NaN	NaN	1	NaN	NaN	58.997
O75717	923	O75717	O75717	WD repeat and HMG-box DNA-binding protein 1	WDHD1	QGRVNPFKVSASSKEPAMSMNSARSTNILDN	495	P	3	998		1	0.00206389	62.055	44.255	62.055	-0.10124	0	NaN	NaN	1	NaN	NaN	62.055
O75746	36	O75746	O75746	Calcium-binding mitochondrial carrier protein Aralar1	SLC25A12	LQYASTEVDGERYMTPEDFVQRYLGLYNDPN	497	P	3	1000		1	3.95646e-05	110.72	94.378	99.686	0.52455	110160000	1	NaN	NaN	110.72	NaN	NaN
O75781	115	O75781	O75781	Paralemmin-1	PALM	RGDSAPATAKENAAAPSPVRAPAPSPAKEER	498	P	3	1002		1	0.00657378	47.75	38.654	47.75	-2.2361	16089000	1	NaN	NaN	47.75	NaN	NaN
O75781	117	O75781	O75781	Paralemmin-1	PALM	DSAPATAKENAAAPSPVRAPAPSPAKEERKT	499	P	3	1002		1	0.00657378	47.75	38.654	47.75	-2.2361	16089000	1	NaN	NaN	47.75	NaN	NaN
O75781	121	O75781	O75781	Paralemmin-1	PALM	ATAKENAAAPSPVRAPAPSPAKEERKTEVVM	500	P	3	1002		1	0.00657378	47.75	38.654	47.75	-2.2361	16089000	1	NaN	NaN	47.75	NaN	NaN
O75781	123	O75781	O75781	Paralemmin-1	PALM	AKENAAAPSPVRAPAPSPAKEERKTEVVMNS	501	P	3	1002		1	0.00657378	47.75	38.654	47.75	-2.2361	16089000	1	NaN	NaN	47.75	NaN	NaN
O75781	125	O75781	O75781	Paralemmin-1	PALM	ENAAAPSPVRAPAPSPAKEERKTEVVMNSQQ	502	P	3	1002		1	0.00657378	47.75	38.654	47.75	-2.2361	16089000	1	NaN	NaN	47.75	NaN	NaN
O75822	150	O75822	O75822	Eukaryotic translation initiation factor 3 subunit J	EIF3J	TFGVNNAVYGIDAMNPSSRDDFTEFGKLLKD	509	P	4	1011		1	6.2756e-08	103.94	96.681	103.94	-1.6233	89501000	1	NaN	NaN	103.94	NaN	NaN
O75844	302	O75844	O75844	CAAX prenyl protease 1 homolog	ZMPSTE24	YSVLNKDIQEDSGMEPRNEEEGNSEEIKAKV	512	P	3	1016		1	2.11972e-19	157.28	143.87	122.27	-0.085382	505620000	1	NaN	1	122.27	NaN	157.28
O75886	124	O75886	O75886	Signal transducing adapter molecule 2	STAM2	LKSLMVEWSEEFQKDPQFSLISATIKSMKEE	517	P	3	1026		1	0.0320448	43.523	31.443	43.523	-3.4218	16797000	1	NaN	NaN	43.523	NaN	NaN
O75915	7	O75915	O75915	PRA1 family protein 3	ARL6IP5	_________MDVNIAPLRAWDDFFPGSDRFA	521	P	3	1034		1	0.000939798	58.49	50.651	46.027	-0.034102	15402000	NaN	NaN	1	NaN	NaN	58.49
O75915	16	O75915	O75915	PRA1 family protein 3	ARL6IP5	MDVNIAPLRAWDDFFPGSDRFARPDFRDISK	522	P	3	1034		1	0.000939798	58.49	50.651	46.027	-0.034102	15402000	NaN	NaN	1	NaN	NaN	58.49
O75915	161	O75915	O75915	PRA1 family protein 3	ARL6IP5	NKLENKMEGIGLKRTPMGIVLDALEQQEEGI	523	P	4	1034		1	1.22671e-08	130.12	112.78	130.12	-0.49761	72644000	1	NaN	NaN	130.12	NaN	NaN
O75976	604	O75976	O75976	Carboxypeptidase D	CPD	PEVTDLVHNTRIHLMPSMNPDGYEKSQEGDS	533	P	4	1053		0.956846	0.000503877	65.779	58.498	65.779	-0.90458	38090000	0.956846	NaN	NaN	65.779	NaN	NaN
O76003	230	O76003	O76003	Glutaredoxin-3	GLRX3	IIKELEASEELDTICPKAPKLEERLKVLTNK	534	P	2	1054		1	8.89574e-19	199.68	183.54	199.68	0.60308	336950000	1	NaN	NaN	199.68	NaN	NaN
O76031	575	O76031	O76031	ATP-dependent Clp protease ATP-binding subunit clpX-like, mitochondrial	CLPX	GARGLRSIMEKLLLEPMFEVPNSDIVCVEVD	538	P	4	1057		0.999976	0.000162084	80.664	63.998	80.664	1.209	65733000	NaN	NaN	0.999976	NaN	NaN	80.664
O76031	248	O76031	O76031	ATP-dependent Clp protease ATP-binding subunit clpX-like, mitochondrial	CLPX	DEYRFTKLLQIAGISPHGNALGASMQQQVNQ	539	P	3	1057		0.999963	0.000306305	58.945	54.277	58.945	1.357	199840000	0.999963	NaN	0.99979	58.945	NaN	51.621
O76080	9	O76080	O76080	AN1-type zinc finger protein 5	ZFAND5	_______MAQETNQTPGPMLCSTGCGFYGNP	540	P	3	1068		0.533603	0.00164468	48.685	46.372	48.685	-1.0599	5040700	NaN	NaN	0.533603	NaN	NaN	48.685
O76080	115	O76080	O76080	AN1-type zinc finger protein 5	ZFAND5	QMTEMSISREDKITTPKTEVSEPVVTQPSPS	541	P	4	1068		0.999244	0.00786079	47.237	37.904	47.237	1.2886	63373000	NaN	NaN	0.999244	NaN	NaN	47.237
O94760	259	O94760	O94760	N(G),N(G)-dimethylarginine dimethylaminohydrolase 1	DDAH1	ESAKVYEKLKDHMLIPVSMSELEKVDGLLTC	545	P	5	1073		1	0.00100272	55.783	46.945	55.783	0.033227	51806000	1	NaN	NaN	55.783	NaN	NaN
O94804	948	O94804	O94804	Serine/threonine-protein kinase 10	STK10	REQEMFFKLSEEAECPNPSTPSKAAKFFPYS	551	P	2	1083		0.981934	0.00882363	111.86	104.13	111.86	0.82437	26826000	0.981934	NaN	NaN	111.86	NaN	NaN
O94826	272	O94826	O94826	Mitochondrial import receptor subunit TOM70	TOMM70A	IKSYFSSFTDDIISQPMLKGEKSDEDKDKEG	556	P	2	1092		1	5.11609e-22	191.19	179.27	178.23	0.23849	454670000	1	NaN	1	191.19	NaN	178.23
O94854;Q9UPN3	2029;5902	O94854;Q9UPN3	Q9UPN3	Uncharacterized protein KIAA0754;Microtubule-actin cross-linking factor 1, isoforms 1/2/3/5	KIAA0754;MACF1	VSQSTQITEFHDKIEPMLETLENLSSRLRMP	557	P	4	1099;9318		1	4.24092e-22	148.75	138.26	100.41	1.0998	283410000	1	NaN	1	148.75	NaN	100.41
O94903	50	O94903	O94903	Proline synthase co-transcribed bacterial homolog protein	PROSC	LPAIQPRLVAVSKTKPADMVIEAYGHGQRTF	561	P	4	1115		1	0.000866222	77.562	70.671	60.474	0.25691	257490000	1	NaN	1	77.562	NaN	60.474
O94952	543	O94952	O94952	F-box only protein 21	FBXO21	MMGHEWIRNMNVHSLPHGHHQPFYNVLVEDG	568	P	5	1127		0.930697	0.00202714	54.521	48.618	54.521	-1.1217	93139000	0.870044	NaN	0.930697	46.404	NaN	54.521
O95104	143	O95104	O95104	Splicing factor, arginine/serine-rich 15	SCAF4	IQPLLDMAAGTSNAAPVAENVTNNEGSPPPP	575	P	4	1150		0.998988	0.000154459	40.347	39.054	40.347	-1.4831	125340000	NaN	NaN	0.998988	NaN	NaN	40.347
O95104	155	O95104	O95104	Splicing factor, arginine/serine-rich 15	SCAF4	NAAPVAENVTNNEGSPPPPVKVSSEPPTQAT	576	P	4	1150		0.99902	0.000154459	40.347	39.054	40.347	-1.4831	125340000	NaN	NaN	0.99902	NaN	NaN	40.347
O95104	156	O95104	O95104	Splicing factor, arginine/serine-rich 15	SCAF4	AAPVAENVTNNEGSPPPPVKVSSEPPTQATP	577	P	4	1150		0.99902	0.000154459	40.347	39.054	40.347	-1.4831	125340000	NaN	NaN	0.99902	NaN	NaN	40.347
O95104	157	O95104	O95104	Splicing factor, arginine/serine-rich 15	SCAF4	APVAENVTNNEGSPPPPVKVSSEPPTQATPN	578	P	4	1150		0.99902	0.000154459	40.347	39.054	40.347	-1.4831	125340000	NaN	NaN	0.99902	NaN	NaN	40.347
O95104	158	O95104	O95104	Splicing factor, arginine/serine-rich 15	SCAF4	PVAENVTNNEGSPPPPVKVSSEPPTQATPNS	579	P	4	1150		0.998791	0.000154459	40.347	39.054	40.347	-1.4831	125340000	NaN	NaN	0.998791	NaN	NaN	40.347
O95139	119	O95139	O95139	NADH dehydrogenase [ubiquinone] 1 beta subcomplex subunit 6	NDUFB6	IFPGDTILETGEVIPPMKEFPDQHH______	581	P	3	1153		0.853378	0.00123796	86.625	71.033	86.625	-0.18035	966570000	NaN	NaN	0.853378	NaN	NaN	86.625
O95164	6	O95164	O95164	Ubiquitin-like protein 3	UBL3	__________MSSNVPADMINLRLILVSGKT	587	P	2	1161		1	0.0140702	47.823	20.709	47.823	-2.457	2383800	1	NaN	NaN	47.823	NaN	NaN
O95167	64	O95167	O95167	NADH dehydrogenase [ubiquinone] 1 alpha subcomplex subunit 3	NDUFA3	TPYNYPVPVRDDGNMPDVPSHPQDPQGPSLE	591	P	4	1163		0.55007	0.00344998	46.31	42.035	40.638	-2.9424	54379000	0.55007	NaN	NaN	46.31	NaN	NaN
O95167	73	O95167	O95167	NADH dehydrogenase [ubiquinone] 1 alpha subcomplex subunit 3	NDUFA3	RDDGNMPDVPSHPQDPQGPSLEWLKKL____	592	P	4	1163		0.84168	0.00158419	48.388	44.113	46.31	-0.78195	282420000	0.84168	NaN	NaN	48.388	NaN	NaN
O95167	76	O95167	O95167	NADH dehydrogenase [ubiquinone] 1 alpha subcomplex subunit 3	NDUFA3	GNMPDVPSHPQDPQGPSLEWLKKL_______	593	P	4	1163		0.84168	0.00158419	48.388	44.113	46.31	-0.78195	282420000	0.84168	NaN	NaN	48.388	NaN	NaN
O95169	66	O95169	O95169	NADH dehydrogenase [ubiquinone] 1 beta subcomplex subunit 8, mitochondrial	NDUFB8	AAKKYNMRVEDYEPYPDDGMGYGDYPKLPDR	594	P	3	1165		0.972406	0.00138351	62.684	62.684	55.705	0.90679	69351000	0.971747	NaN	0.972406	62.684	NaN	55.705
O95202	637	O95202	O95202	LETM1 and EF-hand domain-containing protein 1, mitochondrial	LETM1	LISQLEMDQQAGKLAPANGMPTGENVISVAE	599	P	2	1173		0.999302	3.48183e-06	116.43	116.43	116.43	-0.37352	275150000	0.999302	NaN	NaN	116.43	NaN	NaN
O95232	20	O95232	O95232	Luc7-like protein 3	LUC7L3	AQLLDELMGRDRNLAPDEKRSNVRWDHESVC	600	P	3	1179		1	6.19767e-05	69.122	56.568	48.656	0.34399	92639000	1	NaN	1	69.122	NaN	58.914
O95235	511	O95235	O95235	Kinesin-like protein KIF20A	KIF20A	HVAKFSAIASQLVHAPPMQLGFPSLHSFIKE	601	P	6	1180		0.781238	5.09363e-08	81.988	74.613	61.082	-0.11649	165290000	NaN	NaN	0.781238	NaN	NaN	81.988
O95235	57	O95235	O95235	Kinesin-like protein KIF20A	KIF20A	DCSVVSTSLEDKQQVPSEDSMEKVKVYLRVR	603	P	4	1180		1	0.009554	44.05	38.784	42.659	0.94094	103250000	1	NaN	1	42.659	NaN	44.05
O95235	22	O95235	O95235	Kinesin-like protein KIF20A	KIF20A	SPPAGLLSDDDVVVSPMFESTAADLGSVVRK	604	P	4	1180		0.928366	0.000124801	43.066	35.449	43.066	0.64027	41440000	NaN	NaN	0.928366	NaN	NaN	43.066
O95248	1821	O95248	O95248	Myotubularin-related protein 5	SBF1	GVIDLAEVEAVAPGTPTMGAPKTVDEKAFFD	605	P	3	1183		0.818283	0.00556522	54.857	39.38	54.857	0.74831	55335000	NaN	NaN	0.818283	NaN	NaN	54.857
O95319	110	O95319	O95319	CUGBP Elav-like family member 2	CELF2	AALEAQNALHNIKTLPGMHHPIQMKPADSEK	609	P	4	1198		0.525104	0.0163083	44.3	44.3	44.3	0.8029	20299000	0.525104	NaN	NaN	44.3	NaN	NaN
O95340	540	O95340	O95340	Bifunctional 3'-phosphoadenosine 5'-phosphosulfate synthase 2;Sulfate adenylyltransferase;Adenylyl-sulfate kinase	PAPSS2	DLYEPTHGGKVLSMAPGLTSVEIIPFRVAAY	611	P	3	1200		1	0.000586267	89.506	54.686	89.506	0.14086	218710000	NaN	NaN	1	NaN	NaN	89.506
O95347	1050	O95347	O95347	Structural maintenance of chromosomes protein 2	SMC2	QKVNKDFGSIFSTLLPGANAMLAPPEGQTVL	612	P	3	1202		0.940595	2.58436e-05	61.669	57.047	61.669	0.91249	415560000	0.940595	NaN	NaN	61.669	NaN	NaN
O95372	180	O95372	O95372	Acyl-protein thioesterase 2	LYPLA2	DLAILQCHGELDPMVPVRFGALTAEKLRSVV	616	P	4	1207		0.550057	0.000422327	56.46	45.753	56.46	1.2156	66683000	0.550057	NaN	0.531505	56.46	NaN	51.844
O95372	214	O95372	O95372	Acyl-protein thioesterase 2	LYPLA2	RVQFKTYPGVMHSSCPQEMAAVKEFLEKLLP	619	P	4	1207		0.986546	0.0218672	42.806	40.43	42.806	-0.89033	137240000	0.986546	NaN	NaN	42.806	NaN	NaN
O95373	974	O95373	O95373	Importin-7	IPO7	YQIFKAIFQTIQNRNPVWYQALTHGLNEEQR	620	P	3	1208		1	0.0151485	69.071	63.104	69.071	-3.7516	0	1	NaN	NaN	69.071	NaN	NaN
O95373	541	O95373	O95373	Importin-7	IPO7	SNQEKAKEYITPFIRPVMQALLHIIRETEND	622	P	4	1208		0.99392	8.47727e-05	82.007	73.512	82.007	-0.1838	153660000	0.5	NaN	0.99392	53.968	NaN	82.007
O95391	157	O95391	O95391	Pre-mRNA-splicing factor SLU7	SLU7	AKFTGTNIAPDEHVQPQLMFDYDGKRDRWNG	627	P	3	1212		0.997275	0.00015438	104.81	94.553	104.81	0.036538	19823000	0.997275	NaN	NaN	104.81	NaN	NaN
O95394	160	O95394	O95394	Phosphoacetylglucosamine mutase	PGM3	TVLGGQFHDYGLLTTPQLHYMVYCRNTGGRY	629	P	4	1213		1	2.98539e-06	76.891	68.625	76.891	-0.57622	49712000	NaN	NaN	1	NaN	NaN	76.891
O95425	888	O95425	O95425	Supervillin	SVIL	PAVNTSVSTVASTVAPMYAGDLRTKPPLDHN	631	P	3	1221		0.99541	0.0103014	42.708	36.274	42.708	0.95261	23260000	0.99541	NaN	NaN	42.708	NaN	NaN
O95425	1080	O95425	O95425	Supervillin	SVIL	QTGTAAGKTIAQTTAPVSWKPQDSSEQPQEK	632	P	3	1221		0.989807	0.0330193	56.72	54.034	56.72	-2.2935	33507000	0.989807	NaN	NaN	56.72	NaN	NaN
O95425	1085	O95425	O95425	Supervillin	SVIL	AGKTIAQTTAPVSWKPQDSSEQPQEKLCKNP	633	P	3	1221		0.988134	0.0330193	56.72	54.034	56.72	-2.2935	33507000	0.988134	NaN	NaN	56.72	NaN	NaN
O95571	242	O95571	O95571	Persulfide dioxygenase ETHE1, mitochondrial	ETHE1	GNLNLPKPQQIDFAVPANMRCGVQTPTA___	636	P	3	1241		0.999881	1.75346e-05	86.748	86.748	86.748	0.17183	41978000	0.999881	NaN	NaN	86.748	NaN	NaN
O95573	83	O95573	O95573	Long-chain-fatty-acid--CoA ligase 3	ACSL3	YRSVNSLDGLASVLYPGCDTLDKVFTYAKNK	640	P	2	1242		1	0.00250513	85.837	73.07	85.837	-0.25815	17573000	1	NaN	NaN	85.837	NaN	NaN
O95602	1495	O95602	O95602	DNA-directed RNA polymerase I subunit RPA1	POLR1A	LTQPRKPTHSQEPQGPEAMERRVQAVREIHP	642	P	3	1243		0.998244	0.00134075	93.495	81.645	93.495	-1.6881	53400000	0.998244	NaN	0.988083	93.495	NaN	82.877
O95602	1668	O95602	O95602	DNA-directed RNA polymerase I subunit RPA1	POLR1A	VYKPLNRFGIRSNSSPLQQMTFETSFQFLKQ	643	P	3	1243		1	7.74799e-05	97.284	94.046	97.284	-1.2527	103760000	NaN	NaN	1	NaN	NaN	97.284
O95613	1758	O95613	O95613	Pericentrin	PCNT	HEVIEKLQHELSLMGPVVHEVSDSQAGSLQS	648	P	4	1244		0.999919	0.000589838	40.937	36.405	40.937	-0.13715	5939000	NaN	NaN	0.999919	NaN	NaN	40.937
O95782	898	O95782	O95782	AP-2 complex subunit alpha-1	AP2A1	SLPQQEAQKIFKANHPMDAEVTKAKLLGFGS	662	P	2	1273		1	0.000233826	120.57	107.62	115.57	0.020265	21730000	1	NaN	1	115.57	NaN	120.57
O95793	564	O95793	O95793	Double-stranded RNA-binding protein Staufen homolog 1	STAU1	ILKLLSELDQQSTEMPRTGNGPMSVCGRC__	664	P	3	1277		1	0.00882542	89.548	73.41	68.83	2.4642	18407000	1	NaN	1	89.548	NaN	68.83
O95817	174	O95817	O95817	BAG family molecular chaperone regulator 3	BAG3	AAQPPASHGPERSQSPAASDCSSSSSSASLP	665	P	3	1281		0.998703	0.0080483	50.215	46.927	50.215	-0.11826	7219800	0.998703	NaN	NaN	50.215	NaN	NaN
O95819	895	O95819	O95819	Mitogen-activated protein kinase kinase kinase kinase 4	MAP4K4	GFSCDGMRPEAIRQDPTRKGSVVNVNPTNTR	668	P	4	1282		0.519169	0.00130674	48.204	40.945	48.204	-0.79409	10571000	NaN	NaN	0.519169	NaN	NaN	48.204
O95819	825	O95819	O95819	Mitogen-activated protein kinase kinase kinase kinase 4	MAP4K4	ESVKTMIVHDDVESEPAMTPSKEGTLIVRQT	669	P	3	1282		0.989398	0.0177829	50.387	41.34	50.387	0.12749	17761000	0.989398	NaN	NaN	50.387	NaN	NaN
O95881	100	O95881	O95881	Thioredoxin domain-containing protein 12	TXNDC12	LSHNFVMVNLEDEEEPKDEDFSPDGGYIPRI	675	P	5	1298		0.92139	0.000135864	45.47	42.733	45.47	2.0617	13614000	0.92139	NaN	NaN	45.47	NaN	NaN
O95985	318	O95985	O95985	DNA topoisomerase 3-beta-1	TOP3B	TVEMLRVASSSLGMGPQHAMQTAERLYTQGY	677	P	3	1306		1	0.00649292	55.864	46.284	55.864	-0.28281	17923000	1	NaN	NaN	55.864	NaN	NaN
O96008	80	O96008	O96008	Mitochondrial import receptor subunit TOM40 homolog	TOMM40	ASGAAEDGACGCLPNPGTFEECHRKCKELFP	680	P	4	1314		0.999906	0.0114647	40.456	38.67	40.456	-0.24079	15314000	0.999906	NaN	NaN	40.456	NaN	NaN
O96013	284	O96013	O96013	Serine/threonine-protein kinase PAK 4	PAK4	PQLAPPACTPAAPAVPGPPGPRSPQREPQRV	681	P	4	1316		0.718848	1.94495e-05	48.08	46.147	48.08	-0.598	18065000	NaN	NaN	0.718848	NaN	NaN	48.08
O96013	286	O96013	O96013	Serine/threonine-protein kinase PAK 4	PAK4	LAPPACTPAAPAVPGPPGPRSPQREPQRVSH	682	P	4	1316		0.718848	1.94495e-05	48.08	46.147	48.08	-0.598	18065000	NaN	NaN	0.718848	NaN	NaN	48.08
O96013	287	O96013	O96013	Serine/threonine-protein kinase PAK 4	PAK4	APPACTPAAPAVPGPPGPRSPQREPQRVSHE	683	P	4	1316		0.718848	1.94495e-05	48.08	46.147	48.08	-0.598	18065000	NaN	NaN	0.718848	NaN	NaN	48.08
O96013	289	O96013	O96013	Serine/threonine-protein kinase PAK 4	PAK4	PACTPAAPAVPGPPGPRSPQREPQRVSHEQF	684	P	4	1316		0.718848	1.94495e-05	48.08	46.147	48.08	-0.598	18065000	NaN	NaN	0.718848	NaN	NaN	48.08
O96013	292	O96013	O96013	Serine/threonine-protein kinase PAK 4	PAK4	TPAAPAVPGPPGPRSPQREPQRVSHEQFRAA	685	P	4	1316		0.722024	1.94495e-05	48.08	46.147	48.08	-0.598	18065000	NaN	NaN	0.722024	NaN	NaN	48.08
O96013	296	O96013	O96013	Serine/threonine-protein kinase PAK 4	PAK4	PAVPGPPGPRSPQREPQRVSHEQFRAALQLV	686	P	4	1316		0.7311	1.94495e-05	48.08	46.147	48.08	-0.598	18065000	NaN	NaN	0.7311	NaN	NaN	48.08
O96019	220	O96019	O96019	Actin-like protein 6A	ACTL6A	QCRELFQEMNIELVPPYMIASKEAVREGSPA	688	P	2	1319		0.77545	0.00092916	89.26	89.26	89.26	0.37734	17154000	0	NaN	0.77545	NaN	NaN	89.26
O96028	137	O96028	O96028	Histone-lysine N-methyltransferase NSD2	WHSC1	PEIKLKITKTYMNGKPLFESSICGDSAADVS	691	P	4	1321		0.999999	6.09739e-07	63.033	59.218	63.033	0.16522	127020000	0.999999	NaN	0.999997	63.033	NaN	55.033
P00374	104	P00374	P00374	Dihydrofolate reductase	DHFR	FLSRSLDDALKLTEQPELANKVDMVWIVGGS	695	P	3	1327		1	0.0183291	58.373	45.571	58.373	0.90209	14592000	NaN	NaN	1	NaN	NaN	58.373
P00403	208	P00403	P00403	Cytochrome c oxidase subunit 2	MT-CO2	YGQCSEICGANHSFMPIVLELIPLKIFEMGP	703	P	3	1331		0.996852	6.83566e-06	53.648	49.574	53.648	-0.65283	70559000	0.996852	NaN	NaN	53.648	NaN	NaN
P00558	28	P00558	P00558	Phosphoglycerate kinase 1	PGK1	DVKGKRVVMRVDFNVPMKNNQITNNQRIKAA	714	P	4	1339		1	7.49348e-11	176.25	159.72	72.443	0.51401	1601600000	1	NaN	1	98.942	NaN	176.25
P00568	68	P00568	P00568	Adenylate kinase isoenzyme 1	AK1	RGKKLSEIMEKGQLVPLETVLDMLRDAMVAK	716	P	3	1340		1	0.0211354	54.744	48.713	54.744	0.14554	18644000	NaN	NaN	1	NaN	NaN	54.744
P02545	594	P02545	P02545	Prelamin-A/C;Lamin-A/C	LMNA	YNLRSRTVLCGTCGQPADKASASGSGAQVGG	770	P	4	1360		0.930838	0.000197422	42.782	41.338	42.782	2.5141	43706000	0.781794	NaN	0.930838	42.015	NaN	42.782
P02786	516	P02786	P02786	Transferrin receptor protein 1;Transferrin receptor protein 1, serum form	TFRC	LLYTLIEKTMQNVKHPVTGQFLYQDSNWASK	771	P	3	1367		1	0.00152377	59.814	53.719	50.215	0.70125	285930000	1	NaN	NaN	59.814	NaN	NaN
P04040	336	P04040	P04040	Catalase	CAT	NPVNYFAEVEQIAFDPSNMPPGIEASPDKML	773	P	3	1377		0.82539	3.11213e-06	70.268	66.272	70.268	-0.2453	13176000	0.82539	0	NaN	70.268	NaN	NaN
P04062	454	P04062	P04062	Glucosylceramidase	GBA	SPIIVDITKDTFYKQPMFYHLGHFSKFIPEG	777	P	5	1379		1	3.09699e-07	123.25	118.24	123.25	-0.36299	870630000	NaN	NaN	1	NaN	NaN	123.25
P04083	115	P04083	P04083	Annexin A1	ANXA1	LTGHLEEVVLALLKTPAQFDADELRAAMKGL	783	P	4	1383		1	7.45254e-06	120.74	110.95	120.74	1.1789	84889000	NaN	NaN	1	NaN	NaN	120.74
P04350	160	P04350	P04350	Tubulin beta-4A chain	TUBB4A	SGMGTLLISKIREEFPDRIMNTFSVVPSPKV	790	P	3	1388		0.998691	0.0126992	58.49	7.1419	58.49	0.17708	48669000	NaN	NaN	0.998691	NaN	NaN	58.49
P05023	501	P05023	P05023	Sodium/potassium-transporting ATPase subunit alpha-1	ATP1A1	NKYQLSIHKNPNTSEPQHLLVMKGAPERILD	804	P	6	1401		0.860402	9.53363e-05	50.492	45.824	50.492	0.14112	2731900000	0.860402	NaN	NaN	50.492	NaN	NaN
P05388	232	P05388	P05388	60S acidic ribosomal protein P0	RPLP0	EGVRNVASVCLQIGYPTVASVPHSIINGYKR	812	P	4	1416		0.995105	0.0141708	40.094	22.447	40.094	-0.50831	164790000	NaN	NaN	0.995105	NaN	NaN	40.094
P05412	233	P05412	P05412	Transcription factor AP-1	JUN	QHPRLQALKEEPQTVPEMPGETPPLSPIDME	813	P	3	1417		0.961214	0.000183166	64.213	59.258	64.213	1.2995	14058000	NaN	NaN	0.961214	NaN	NaN	64.213
P05423	113	P05423	P05423	DNA-directed RNA polymerase III subunit RPC4	POLR3D	GRPEVIQSHSIFEQGPAEMMKKKGNWDKTVD	814	P	4	1418		0.999985	0.00626892	48.229	40.425	48.229	4.0604	9244600	NaN	NaN	0.999985	NaN	NaN	48.229
P05455	119	P05455	P05455	Lupus La protein	SSB	YKNDVKNRSVYIKGFPTDATLDDIKEWLEDK	816	P	4	1419		1	0.00206735	58.284	47.18	58.284	3.4895	311990000	1	NaN	NaN	58.284	NaN	NaN
P06132	307	P06132	P06132	Uroporphyrinogen decarboxylase	UROD	RECVGKTVTLQGNLDPCALYASEEEIGQLVK	818	P	3	1426		1	0.000683469	67.877	65.448	51.857	0.14642	8371800	1	NaN	NaN	67.877	NaN	NaN
P06241	303	P06241	P06241	Tyrosine-protein kinase Fyn	FYN	GTWNGNTKVAIKTLKPGTMSPESFLEEAQIM	819	P	4	1428		0.949609	0.00266135	60.561	60.561	60.561	-0.1572	119830000	0.949609	NaN	0.824687	60.561	NaN	54.225
P06493	285	P06493	P06493	Cyclin-dependent kinase 1	CDK1	YDPAKRISGKMALNHPYFNDLDNQIKKM___	824	P	4	1432		1	0.0140425	53.565	44.964	53.565	0.38263	28964000	NaN	NaN	1	NaN	NaN	53.565
P06576	410	P06576	P06576	ATP synthase subunit beta, mitochondrial	ATP5B	YPAVDPLDSTSRIMDPNIVGSEHYDVARGVQ	825	P	4	1433		0.797451	8.67836e-08	70.578	61.96	70.578	-0.54349	61309000	NaN	NaN	0.797451	NaN	NaN	70.578
P06744	403	P06744	P06744	Glucose-6-phosphate isomerase	GPI	QHAFYQLIHQGTKMIPCDFLIPVQTQHPIRK	833	P	4	1438		0.999872	0.000897843	66.809	65.511	65.107	0.091934	45949000	0.999872	NaN	NaN	66.809	NaN	NaN
P06744	164	P06744	P06744	Glucose-6-phosphate isomerase	GPI	ITDVINIGIGGSDLGPLMVTEALKPYSSGGP	837	P	3	1438		1	3.89709e-82	208.82	177.22	50.432	0.38793	332720000	0.999998	NaN	1	208.82	NaN	50.432
P06746	151	P06746	P06746	DNA polymerase beta	POLB	QRIGLKYFGDFEKRIPREEMLQMQDIVLNEV	838	P	4	1439		1	0.0030647	64.265	50.373	64.265	0.17633	112240000	1	NaN	1	55.383	NaN	64.265
P06865	397	P06865	P06865	Beta-hexosaminidase subunit alpha	HEXA	KIQPDTIIQVWREDIPVNYMKELELVTKAGF	843	P	4	1443		0.990352	0.00966217	47.73	38.186	47.73	0.35821	145400000	NaN	NaN	0.990352	NaN	NaN	47.73
P07108	45	P07108	P07108	Acyl-CoA-binding protein	DBI	GHYKQATVGDINTERPGMLDFTGKAKWDAWN	844	P	3	1447		1	0.0044581	76.329	72.994	76.329	0.10993	72680000	NaN	NaN	1	NaN	NaN	76.329
P07237	493	P07237	P07237	Protein disulfide-isomerase	P4HB	AGDDDDLEDLEEAEEPDMEEDDDQKAVKDEL	850	P	4	1455		1	6.66499e-12	118.8	117.54	107.62	-0.46826	333050000	1	NaN	NaN	118.8	NaN	NaN
P07910	112	P07910	P07910	Heterogeneous nuclear ribonucleoproteins C1/C2	HNRNPC	VKRSAAEMYGSVTEHPSPSPLLSSSFDLDYD	880	P	5	1473		0.85697	2.74027e-06	54.326	52.955	54.326	-0.33342	12874000	NaN	NaN	0.85697	NaN	NaN	54.326
P07947	314	P07947	P07947	Tyrosine-protein kinase Yes	YES1	TTKVAIKTLKPGTMMPEAFLQEAQIMKKLRH	882	P	3	1476		0.55928	0.000782295	65.25	65.25	65.25	-1.1195	37416000	0.55928	NaN	NaN	65.25	NaN	NaN
P08069	989	P08069	P08069	Insulin-like growth factor 1 receptor;Insulin-like growth factor 1 receptor alpha chain;Insulin-like growth factor 1 receptor beta chain	IGF1R	ASVNPEYFSAADVYVPDEWEVAREKITMSRE	886	P	3	1482		0.996377	0.0113244	50.493	44.891	50.493	-3.5027	0	NaN	NaN	0.996377	NaN	NaN	50.493
P08397	208	P08397	P08397	Porphobilinogen deaminase	HMBS	LQRMGWHNRVGQILHPEECMYAVGQGALGVE	903	P	3	1496		1	1.64166e-06	111.67	110.49	111.67	-0.015794	128880000	1	NaN	NaN	111.67	NaN	NaN
P08574	158	P08574	P08574	Cytochrome c1, heme protein, mitochondrial	CYC1	DEAKELAAEVEVQDGPNEDGEMFMRPGKLFD	940	P	3	1499		1	1.90761e-05	99.407	99.407	87.319	-0.53361	840560000	0.933335	0	1	57.826	NaN	99.407
P08574	221	P08574	P08574	Cytochrome c1, heme protein, mitochondrial	CYC1	GGEDYVFSLLTGYCEPPTGVSLREGLYFNPY	942	P	3	1499		0.943792	0.00335068	56.29	48.125	44.953	-0.62129	26789000	0.943792	NaN	NaN	56.29	NaN	NaN
P08621	91	P08621	P08621	U1 small nuclear ribonucleoprotein 70 kDa	SNRNP70	ERRQQEVETELKMWDPHNDPNAQGDAFKTLF	946	P	5	1503		1	0.0148237	54.152	48.551	54.152	0.58995	180860000	1	NaN	NaN	54.152	NaN	NaN
P08621	95	P08621	P08621	U1 small nuclear ribonucleoprotein 70 kDa	SNRNP70	QEVETELKMWDPHNDPNAQGDAFKTLFVARV	947	P	5	1503		1	0.0266872	54.152	48.551	54.152	0.58995	162380000	1	NaN	NaN	54.152	NaN	NaN
P08708	122	P08708	P08708	40S ribosomal protein S17	RPS17	KLLDFGSLSNLQVTQPTVGMNFKTPRGPV__	949	P	3	1507		1	1.55327e-07	102.39	88.536	102.39	2.2835	55943000	1	NaN	NaN	102.39	NaN	NaN
P08842	428	P08842	P08842	Steryl-sulfatase	STS	APLPEDRIIDGRDLMPLLEGKSQRSDHEFLF	950	P	4	1511		0.913396	0.00960898	50.215	38.429	50.215	0.1871	133280000	0.913396	NaN	NaN	50.215	NaN	NaN
P09012	151	P09012	P09012	U1 small nuclear ribonucleoprotein A	SNRPA	AVQGPVPGMPPMTQAPRIMHHMPGQPPYMPP	959	P	3	1516		0.534591	6.71586e-05	66.98	60.753	66.98	-0.91244	64871000	0.534591	0	0.425787	66.98	NaN	48.634
P09651	49	P09651	P09651	Heterogeneous nuclear ribonucleoprotein A1;Heterogeneous nuclear ribonucleoprotein A1, N-terminally processed	HNRNPA1	FEQWGTLTDCVVMRDPNTKRSRGFGFVTYAT	969	P	4	1539		1	0.00347541	51.834	39.28	51.834	-2.2904	129660000	NaN	NaN	1	NaN	NaN	51.834
P09874	915	P09874	P09874	Poly [ADP-ribose] polymerase 1	PARP1	MVSKSANYCHTSQGDPIGLILLGEVALGNMY	974	P	3	1544		1	0.000870987	49.888	44.047	49.888	0.75051	12095000	1	NaN	NaN	49.888	NaN	NaN
P09884	177	P09884	P09884	DNA polymerase alpha catalytic subunit	POLA1	ILQDLNTETPQITPPPVMILKKKRSIGASPN	978	P	4	1545		0.666363	0.00220127	43.583	41.734	43.583	1.4793	60450000	0.666363	NaN	NaN	43.583	NaN	NaN
P09884	904	P09884	P09884	DNA polymerase alpha catalytic subunit	POLA1	VTEDGEQEQIPELPDPSLEMGILPREIRKLV	979	P	3	1545		0.943747	0.000441377	82.157	74.491	82.157	2.7758	6921300	NaN	NaN	0.943747	NaN	NaN	82.157
P09960	121	P09960	P09960	Leukotriene A-4 hydrolase	LTA4H	SFETSPKSSALQWLTPEQTSGKEHPYLFSQC	985	P	5	1548		1	0.000561115	52.122	43.804	52.122	-1.2806	47223000	1	NaN	NaN	52.122	NaN	NaN
P09960	130	P09960	P09960	Leukotriene A-4 hydrolase	LTA4H	ALQWLTPEQTSGKEHPYLFSQCQAIHCRAIL	986	P	5	1548		1	0.000561115	52.122	43.804	52.122	-1.2806	47223000	1	NaN	NaN	52.122	NaN	NaN
P0DMN0;P0DMM9;P50225	200;200;200	P0DMN0;P50225	P50225	Sulfotransferase 1A4;Sulfotransferase 1A3;Sulfotransferase 1A1	SULT1A4;SULT1A3;SULT1A1	THPVLYLFYEDMKENPKREIQKILEFVGRSL	990	P	4	1572;2577		0.999999	0.00277433	65.107	60.49	65.107	2.0327	96091000	0.999999	NaN	NaN	65.107	NaN	NaN
P0DMV9;P0DMV8	138;138	P0DMV9	P0DMV9	Heat shock 70 kDa protein 1B;Heat shock 70 kDa protein 1A	HSPA1B;HSPA1A	VLTKMKEIAEAYLGYPVTNAVITVPAYFNDS	992	P	3	1573		0.982144	0.0102761	45.126	40.899	45.126	0.46404	3462100	0.982144	NaN	NaN	45.126	NaN	NaN
P0DMV9;P0DMV8	63;63	P0DMV9	P0DMV9	Heat shock 70 kDa protein 1B;Heat shock 70 kDa protein 1A	HSPA1B;HSPA1A	ERLIGDAAKNQVALNPQNTVFDAKRLIGRKF	1002	P	3	1573		1	0.0329547	46.319	28.618	46.319	0.1412	30842000	1	NaN	NaN	46.319	NaN	NaN
P0DMV9;P0DMV8;P34931	436;436;438	P0DMV9;P34931	P0DMV9	Heat shock 70 kDa protein 1B;Heat shock 70 kDa protein 1A;Heat shock 70 kDa protein 1-like	HSPA1B;HSPA1A;HSPA1L	PTKQTQIFTTYSDNQPGVLIQVYEGERAMTK	1003	P	4	1573;2210		0.999996	1.59549e-05	62.302	57.901	62.302	0.95227	396670000	NaN	NaN	0.999996	NaN	NaN	62.302
P0DMV9;P0DMV8;P34931	365;365;367	P0DMV9;P34931	P0DMV9	Heat shock 70 kDa protein 1B;Heat shock 70 kDa protein 1A;Heat shock 70 kDa protein 1-like	HSPA1B;HSPA1A;HSPA1L	LQDFFNGRDLNKSINPDEAVAYGAAVQAAIL;LQDYFNGRDLNKSINPDEAVAYGAAVQAAIL	1005	P	3	1573;2210		1	0.0128671	66.871	58.782	66.871	1.993	1554200	NaN	NaN	1	NaN	NaN	66.871
P10398	226	P10398	P10398	Serine/threonine-protein kinase A-Raf	ARAF	RSTSTPNVHMVSTTAPMDSNLIQLTGQSFST	1012	P	3	1596		0.513868	0.000497866	44.915	44.915	44.915	-0.39892	22168000	0.513868	NaN	NaN	44.915	NaN	NaN
P10398	194	P10398	P10398	Serine/threonine-protein kinase A-Raf	ARAF	LLTPQGPSPRTQHCDPEHFPFPAPANAPLQR	1013	P	4	1596		0.753553	0.0216063	42.172	39.665	42.172	0.82605	10057000	0.753553	NaN	NaN	42.172	NaN	NaN
P10586	821	P10586	P10586	Receptor-type tyrosine-protein phosphatase F	PTPRF	GARSKPKIVTTTGAVPGRPTMMISTTAMNTA	1018	P	5	1600		0.834028	1.12819e-11	62.942	62.942	62.942	-2.3008	22163000	NaN	NaN	0.834028	NaN	NaN	62.942
P10586	1879	P10586	P10586	Receptor-type tyrosine-protein phosphatase F	PTPRF	VVDMFQTVKTLRTQRPAMVQTEDQYQLCYRA	1022	P	3	1600		1	0.00884782	76.713	68.624	76.713	-1.365	14824000	NaN	NaN	1	NaN	NaN	76.713
P10606	38	P10606	P10606	Cytochrome c oxidase subunit 5B, mitochondrial	COX5B	SGAAAMRSMASGGGVPTDEEQATGLEREIML	1023	P	3	1604		1	0.00121532	60.943	48.63	54.744	-0.75585	93347000	1	NaN	1	54.744	NaN	60.943
P10644	334	P10644	P10644	cAMP-dependent protein kinase type I-alpha regulatory subunit;cAMP-dependent protein kinase type I-alpha regulatory subunit, N-terminally processed	PRKAR1A	GPSDYFGEIALLMNRPRAATVVARGPLKCVK	1027	P	4	1608		0.983389	0.000289122	87.489	81.709	87.489	-0.74773	45099000	NaN	NaN	0.983389	NaN	NaN	87.489
P10809	556	P10809	P10809	60 kDa heat shock protein, mitochondrial	HSPD1	TAEVVVTEIPKEEKDPGMGAMGGMGGGMGGG	1030	P	4	1612		1	1.39098e-16	95.603	95.603	88.149	0.67259	994290000	NaN	0	1	NaN	NaN	95.603
P11021	535	P11021	P11021	78 kDa glucose-regulated protein	HSPA5	NKNKITITNDQNRLTPEEIERMVNDAEKFAE	1032	P	4	1615		1	0.000921868	67.979	47.992	67.979	-0.021851	31298000	NaN	NaN	1	NaN	NaN	67.979
P11021	88	P11021	P11021	78 kDa glucose-regulated protein	HSPA5	ERLIGDAAKNQLTSNPENTVFDAKRLIGRTW	1033	P	3	1615		1	0.00941299	53.328	35.822	53.328	-4.415	57334000	NaN	NaN	1	NaN	NaN	53.328
P11142	63	P11142	P11142	Heat shock cognate 71 kDa protein	HSPA8	ERLIGDAAKNQVAMNPTNTVFDAKRLIGRRF	1040	P	2	1619		1	0.0208259	68.355	58.668	60.255	-0.46963	48583000	1	NaN	1	68.355	NaN	60.255
P11171	379	P11171	P11171	Protein 4.1	EPB41	EEKVMELHKSYRSMTPAQADLEFLENAKKLS	1042	P	3	1622		1	0.00127788	78.326	68.538	78.326	-0.2711	48562000	1	NaN	NaN	78.326	NaN	NaN
P11171	781	P11171	P11171	Protein 4.1	EPB41	TYEAAQTDDNSGDLDPGVLLTAQTITSETPS	1043	P	3	1622		0.973104	0.000126934	45.924	43.483	45.924	3.1062	4271000	0.973104	NaN	NaN	45.924	NaN	NaN
P11172	417	P11172	P11172	Uridine 5'-monophosphate synthase;Orotate phosphoribosyltransferase;Orotidine 5'-phosphate decarboxylase	UMPS	SGSRVSMKPEFLHLTPGVQLEAGGDNLGQQY	1045	P	6	1623		0.624919	2.16737e-09	68.333	66.86	68.333	2.2745	50368000	0.624919	0	0	68.333	NaN	NaN
P11177	313	P11177	P11177	Pyruvate dehydrogenase E1 component subunit beta, mitochondrial	PDHB	QFGVGAEICARIMEGPAFNFLDAPAVRVTGA	1046	P	3	1624		0.999999	0.0111204	60.209	49.87	60.209	0.11391	251330000	NaN	NaN	0.999999	NaN	NaN	60.209
P11216	560	P11216	P11216	Glycogen phosphorylase, brain form	PYGB	KFSAFLEKEYKVKINPSSMFDVHVKRIHEYK	1048	P	4	1626		1	0.0169587	62.258	57.047	62.258	0.12701	157940000	1	NaN	1	62.258	NaN	62.258
P11216	343	P11216	P11216	Glycogen phosphorylase, brain form	PYGB	ETFPDKVAIQLNDTHPALSIPELMRILVDVE	1049	P	4	1626		0.635635	0.000110391	70.107	64.563	70.107	-0.57541	189170000	0.635635	NaN	NaN	70.107	NaN	NaN
P11274	107	P11274	P11274	Breakpoint cluster region protein	BCR	ASASRPQPAPADGADPPPAEEPEARPDGEGS	1051	P	4	1629		0.973933	0.000831404	46.31	42.825	46.31	-0.17426	37029000	0.973933	NaN	NaN	46.31	NaN	NaN
P11274	108	P11274	P11274	Breakpoint cluster region protein	BCR	SASRPQPAPADGADPPPAEEPEARPDGEGSP	1052	P	4	1629		0.973933	0.000831404	46.31	42.825	46.31	-0.17426	37029000	0.973933	NaN	NaN	46.31	NaN	NaN
P11274	109	P11274	P11274	Breakpoint cluster region protein	BCR	ASRPQPAPADGADPPPAEEPEARPDGEGSPG	1053	P	4	1629		0.973933	0.000831404	46.31	42.825	46.31	-0.17426	37029000	0.973933	NaN	NaN	46.31	NaN	NaN
P11274	113	P11274	P11274	Breakpoint cluster region protein	BCR	QPAPADGADPPPAEEPEARPDGEGSPGKARP	1054	P	4	1629		0.882856	0.000831404	46.31	42.825	46.31	-0.17426	37029000	0.882856	NaN	NaN	46.31	NaN	NaN
P11274	117	P11274	P11274	Breakpoint cluster region protein	BCR	ADGADPPPAEEPEARPDGEGSPGKARPGTAR	1055	P	4	1629		0.882856	0.000831404	46.31	42.825	46.31	-0.17426	37029000	0.882856	NaN	NaN	46.31	NaN	NaN
P11388	371	P11388	P11388	DNA topoisomerase 2-alpha	TOP2A	VKNHMWIFVNALIENPTFDSQTKENMTLQPK	1060	P	3	1635		0.890396	0.00052202	66.012	60.637	66.012	0.37437	79888000	0.890396	NaN	NaN	66.012	NaN	NaN
P11441	92	P11441	P11441	Ubiquitin-like protein 4A	UBL4A	VLLEEGEAQRLADSPPPQVWQLISKVLARHF	1069	P	2	1637		0.999679	0.0294423	87.184	71.428	87.184	1.7323	66922000	0.999679	NaN	NaN	87.184	NaN	NaN
P11441	93	P11441	P11441	Ubiquitin-like protein 4A	UBL4A	LLEEGEAQRLADSPPPQVWQLISKVLARHFS	1070	P	2	1637		0.999679	0.0294423	87.184	71.428	87.184	1.7323	66922000	0.999679	NaN	NaN	87.184	NaN	NaN
P11498	561	P11498	P11498	Pyruvate carboxylase, mitochondrial	PC	LREGPEGFARAVRNHPGLLLMDTTFRDAHQS	1072	P	4	1639		1	0.0106264	47.808	41.904	47.808	0.76865	29569000	1	NaN	1	47.392	NaN	47.808
P11586	272	P11586	P11586	C-1-tetrahydrofolate synthase, cytoplasmic;Methylenetetrahydrofolate dehydrogenase;Methenyltetrahydrofolate cyclohydrolase;Formyltetrahydrofolate synthetase;C-1-tetrahydrofolate synthase, cytoplasmic, N-terminally processed	MTHFD1	AYDEAKERASFITPVPGGVGPMTVAMLMQST	1073	P	3	1641		0.987983	0.00931161	44.596	44.596	44.596	-0.96156	214120000	NaN	NaN	0.987983	NaN	NaN	44.596
P11586	219	P11586	P11586	C-1-tetrahydrofolate synthase, cytoplasmic;Methylenetetrahydrofolate dehydrogenase;Methenyltetrahydrofolate cyclohydrolase;Formyltetrahydrofolate synthetase;C-1-tetrahydrofolate synthase, cytoplasmic, N-terminally processed	MTHFD1	EEVNKGDILVVATGQPEMVKGEWIKPGAIVI	1077	P	4	1641		1	0.00191008	56.303	48.406	42.106	0.55645	155950000	1	NaN	NaN	56.303	NaN	NaN
P11766	243	P11766	P11766	Alcohol dehydrogenase class-3	ADH5	KFARAKEFGATECINPQDFSKPIQEVLIEMT	1078	P	2	1643		1	0.0142902	106.4	85.699	88.134	-0.048494	191630000	1	NaN	NaN	106.4	NaN	NaN
P11802	239	P11802	P11802	Cyclin-dependent kinase 4	CDK4	GKIFDLIGLPPEDDWPRDVSLPRGAFPPRGP	1080	P	3	1644		0.993515	0.00247987	73.783	66.366	73.783	0.89914	12421000	0.993515	NaN	NaN	73.783	NaN	NaN
P11802	245	P11802	P11802	Cyclin-dependent kinase 4	CDK4	IGLPPEDDWPRDVSLPRGAFPPRGPRPVQSV	1081	P	3	1644		0.987001	0.00247987	73.783	66.366	73.783	0.89914	12421000	0.987001	NaN	NaN	73.783	NaN	NaN
P11940;Q13310	62;62	P11940;Q13310	P11940	Polyadenylate-binding protein 1;Polyadenylate-binding protein 4	PABPC1;PABPC4	ITRRSLGYAYVNFQQPADAERALDTMNFDVI	1091	P	3	1648;3556		1	0.0100901	54.259	48.809	54.259	0.60455	125210000	1	NaN	NaN	54.259	NaN	NaN
P12004	129	P12004	P12004	Proliferating cell nuclear antigen	PCNA	YEMKLMDLDVEQLGIPEQEYSCVVKMPSGEF	1093	P	3	1649		1	0.000901339	63.436	59.485	63.436	0.32761	19262000	1	NaN	NaN	63.436	NaN	NaN
P12004	202	P12004	P12004	Proliferating cell nuclear antigen	PCNA	NVDKEEEAVTIEMNEPVQLTFALRYLNFFTK	1094	P	5	1649		1	0.00317025	44.555	39.011	44.555	0.034709	28389000	1	NaN	NaN	44.555	NaN	NaN
P12235;P12236	133;133	P12235;P12236	P12236	ADP/ATP translocase 1;ADP/ATP translocase 3;ADP/ATP translocase 3, N-terminally processed	SLC25A4;SLC25A6	ASGGAAGATSLCFVYPLDFARTRLAADVGKG;ASGGAAGATSLCFVYPLDFARTRLAADVGKS	1097	P	2	1654;1655		1	0.0228591	97.797	86.853	97.797	-0.61693	26979000	1	NaN	NaN	97.797	NaN	NaN
P12277	112	P12277	P12277	Creatine kinase B-type	CKB	HGGYKPSDEHKTDLNPDNLQGGDDLDPNYVL	1101	P	3	1658		0.583815	0.0274068	44.632	41.831	44.632	2.3177	176230000	NaN	NaN	0.583815	NaN	NaN	44.632
P12277	123	P12277	P12277	Creatine kinase B-type	CKB	TDLNPDNLQGGDDLDPNYVLSSRVRTGRSIR	1102	P	5	1658		0.997577	2.84993e-06	76.476	72.117	76.476	-0.68578	44521000	0.99472	NaN	0.997577	55.101	NaN	76.476
P12956	59	P12956	P12956	X-ray repair cross-complementing protein 6	XRCC6	ASKAMFESQSEDELTPFDMSIQCIQSVYISK	1116	P	3	1668		1	0.000598003	56.783	54.727	56.783	-0.85349	90247000	1	NaN	1	48.337	NaN	56.783
P12956	352	P12956	P12956	X-ray repair cross-complementing protein 6	XRCC6	LKRFDDPGLMLMGFKPLVLLKKHHYLRPSLF	1117	P	3	1668		0.568744	0.0330229	41.695	30.58	41.695	-1.1316	137680000	0.568744	NaN	NaN	41.695	NaN	NaN
P12956	509	P12956	P12956	X-ray repair cross-complementing protein 6	XRCC6	ALDLMEPEQAVDLTLPKVEAMNKRLGSLVDE	1118	P	3	1668		0.999986	0.000168922	113.5	98.845	101.49	1.1673	128230000	NaN	NaN	0.999986	NaN	NaN	113.5
P13639	393	P13639	P13639	Elongation factor 2	EEF2	DDEAAMGIKSCDPKGPLMMYISKMVPTSDKG	1132	P	2	1684		0.999585	0.0329215	85.672	85.672	85.672	-0.11894	32863000	0.999585	NaN	NaN	85.672	NaN	NaN
P13639	532	P13639	P13639	Elongation factor 2	EEF2	LPKLVEGLKRLAKSDPMVQCIIEESGEHIIA	1133	P	4	1684		1	7.48408e-06	114.12	108.86	114.12	-0.57098	83942000	1	NaN	1	114.12	NaN	100.06
P13639	821	P13639	P13639	Elongation factor 2	EEF2	GQAFPQCVFDHWQILPGDPFDNSSRPSQVVA	1135	P	4	1684		0.998453	1.06462e-08	63.282	57.968	56.864	1.316	515240000	0.998453	NaN	0.951505	63.282	NaN	57.832
P13639	824	P13639	P13639	Elongation factor 2	EEF2	FPQCVFDHWQILPGDPFDNSSRPSQVVAETR	1136	P	4	1684		0.998453	1.06462e-08	63.282	57.968	56.864	1.316	515240000	0.998453	NaN	NaN	63.282	NaN	NaN
P13693	113	P13693	P13693	Translationally-controlled tumor protein	TPT1	SIKGKLEEQRPERVKPFMTGAAEQIKHILAN	1142	P	4	1687		1	0.00189741	70.907	67.716	70.907	0.34194	473950000	1	NaN	NaN	70.907	NaN	NaN
P13796	148	P13796	P13796	Plastin-2	LCP1	ALENDPDCRHVIPMNPNTNDLFNAVGDGIVL	1143	P	4	1690		0.587258	6.07014e-05	102.17	97.245	102.17	-0.75751	148100000	NaN	NaN	0.587258	NaN	NaN	102.17
P13796	436	P13796	P13796	Plastin-2	LCP1	SDALVIFQLYEKIKVPVDWNRVNKPPYPKLG	1144	P	4	1690		1	0.000813997	57.351	52.395	57.351	-4.3679	106080000	NaN	NaN	1	NaN	NaN	57.351
P13797	564	P13797	P13797	Plastin-3	PLS3	ISSSLAVVDLIDAIQPGCINYDLVKSGNLTE	1149	P	3	1691		1	0.000137011	81.65	75.286	81.65	2.5844	28424000	1	NaN	NaN	81.65	NaN	NaN
P13995	208	P13995	P13995	Bifunctional methylenetetrahydrofolate dehydrogenase/cyclohydrolase, mitochondrial;NAD-dependent methylenetetrahydrofolate dehydrogenase;Methenyltetrahydrofolate cyclohydrolase	MTHFD2	GKNVVVAGRSKNVGMPIAMLLHTDGAHERPG	1154	P	5	1701		0.988728	0.000355523	53.266	53.266	53.266	0.48768	7955200	0.988728	NaN	NaN	53.266	NaN	NaN
P14324	102	P14324	P14324	Farnesyl pyrophosphate synthase	FDPS	FSQIVRVLTEDEMGHPEIGDAIARLKEVLEY	1159	P	3	1706		1	0.00223452	71.558	66.656	71.558	-0.1854	4607500000	NaN	NaN	1	NaN	NaN	71.558
P14373	264	P14373	P14373	Zinc finger protein RFP	TRIM27	QDIGDTLSRAERIRIPEPWITPPDLQEKIHI	1160	P	5	1707		0.90537	0.00566059	44.632	37.757	44.632	-0.95715	34761000	0.90537	NaN	NaN	44.632	NaN	NaN
P14373	266	P14373	P14373	Zinc finger protein RFP	TRIM27	IGDTLSRAERIRIPEPWITPPDLQEKIHIFA	1161	P	5	1707		0.973771	0.00566059	44.632	37.757	44.632	-0.95715	34761000	0.973771	NaN	NaN	44.632	NaN	NaN
P14550	301	P14550	P14550	Alcohol dehydrogenase [NADP(+)]	AKR1A1	MKQLNALNKNWRYIVPMLTVDGKRVPRDAGH	1165	P	2	1712		1	0.0311083	72.643	51.773	72.643	-2.009	0	NaN	NaN	1	NaN	NaN	72.643
P14618	107	P14618	P14618	Pyruvate kinase PKM	PKM	RTATESFASDPILYRPVAVALDTKGPEIRTG	1170	P	4	1713		0.928754	0.000173906	72.569	66.474	72.569	-0.5164	26316000	NaN	NaN	0.928754	NaN	NaN	72.569
P14625	617	P14625	P14625	Endoplasmin	HSP90B1	EKTKESREAVEKEFEPLLNWMKDKALKDKIE	1171	P	2	1715		1	0.0124923	96.334	76.657	96.334	-2.9807	0	NaN	NaN	1	NaN	NaN	96.334
P14625	571	P14625	P14625	Endoplasmin	HSP90B1	ERLLKKGYEVIYLTEPVDEYCIQALPEFDGK	1173	P	3	1715		0.99996	0.000278397	74.579	68.075	74.579	-0.23865	27345000	0.99996	NaN	NaN	74.579	NaN	NaN
P14625	292	P14625	P14625	Endoplasmin	HSP90B1	FPIYVWSSKTETVEEPMEEEEAAKEEKEESD	1176	P	3	1715		1	0.000312534	126.19	118.36	122.01	-0.56145	178120000	1	NaN	1	126.19	NaN	122.01
P14635	378	P14635	P14635	G2/mitotic-specific cyclin-B1	CCNB1	PTLQHYLSYTEESLLPVMQHLAKNVVMVNQG	1177	P	3	1716		0.991016	2.8258e-05	63.085	57.286	63.085	-0.35496	46429000	NaN	NaN	0.991016	NaN	NaN	63.085
P14649	129	P14649	P14649	Myosin light chain 6B	MYL6B	SDELKSRRVDFETFLPMLQAVAKNRGQGTYE	1178	P	4	1717		1	0.035501	50.053	41.052	50.053	0.63288	3640400	1	NaN	NaN	50.053	NaN	NaN
P14678;P63162	238;238	P14678	P14678	Small nuclear ribonucleoprotein-associated proteins B and B';Small nuclear ribonucleoprotein-associated protein N	SNRPB;SNRPN	PPPGMRGPPPPGMRPPRP_____________	1179	P	2	1719		0.673072	0.0069444	71.223	7.9398	71.223	4.1381	20491000	NaN	NaN	0.673072	NaN	NaN	71.223
P14678;P63162	240;240	P14678	P14678	Small nuclear ribonucleoprotein-associated proteins B and B';Small nuclear ribonucleoprotein-associated protein N	SNRPB;SNRPN	PGMRGPPPPGMRPPRP_______________	1180	P	2	1719		0.673072	0.0069444	71.223	7.9398	71.223	4.1381	20491000	NaN	NaN	0.673072	NaN	NaN	71.223
P14735	548	P14735	P14735	Insulin-degrading enzyme	IDE	TNFEILPLEKEATPYPALIKDTAMSKLWFKQ	1181	P	4	1720		0.856759	0.00030248	58.11	43.58	58.11	-0.22967	218240000	0.856759	NaN	NaN	58.11	NaN	NaN
P14866	135	P14866	P14866	Heterogeneous nuclear ribonucleoprotein L	HNRNPL	EALQEFGPISYVVVMPKKRQALVEFEDVLGA	1186	P	4	1723		0.998765	0.00291118	43.936	38.88	41.562	1.4156	26720000	NaN	NaN	0.998765	NaN	NaN	43.936
P14923	512	P14923	P14923	Junction plakoglobin	JUP	LVKATIGLIRNLALCPANHAPLQEAAVIPRL	1201	P	3	1725		0.98467	0.00811968	56.081	48.277	56.081	0.27367	21087000	0.98467	NaN	0.966318	56.081	NaN	51.819
P14923	629	P14923	P14923	Junction plakoglobin	JUP	DKEAADAIDAEGASAPLMELLHSRNEGTATY	1202	P	4	1725		1	0.000723271	54.05	44.423	54.05	-0.042836	30887000	1	NaN	NaN	54.05	NaN	NaN
P15121	189	P15121	P15121	Aldose reductase	AKR1B1	PGLKYKPAVNQIECHPYLTQEKLIQYCQSKG	1208	P	3	1730		0.999836	0.010666	60.474	55.472	60.474	-0.33921	105230000	0.999836	NaN	0.997082	60.474	NaN	48.899
P15170	376	P15170	P15170	Eukaryotic peptide chain release factor GTP-binding subunit ERF3A	GSPT1	NLKIRLKGIEEEEILPGFILCDPNNLCHSGR	1211	P	3	1732		0.866636	0.0275723	42.813	35.938	42.813	-2.2483	19538000	0.866636	NaN	NaN	42.813	NaN	NaN
P15336	108	P15336	P15336	Cyclic AMP-dependent transcription factor ATF-2	ATF2	ENEFKKASEDDIKKMPLDLSPLATPIIRSKI	1215	P	4	1737		0.999975	6.39171e-06	92.932	84.744	92.932	0.0035743	183350000	0.999975	NaN	NaN	92.932	NaN	NaN
P15880	17	P15880	P15880	40S ribosomal protein S2	RPS2	ADDAGAAGGPGGPGGPGMGNRGGFRGGFGSG	1220	P	2	1750		0.998104	1.58845e-10	130.1	120.05	130.1	0.80729	8369300	0.998104	NaN	NaN	130.1	NaN	NaN
P15924	2719	P15924	P15924	Desmoplakin	DSP	KKKMSAAEAVKEKWLPYEAGQRFLEFQYLTG	1227	P	4	1755		0.999999	5.21023e-05	68.444	59.557	68.444	-3.9001	64928000	NaN	NaN	0.999999	NaN	NaN	68.444
P15927	222	P15927	P15927	Replication protein A 32 kDa subunit	RPA2	VAQNQVLNLIKACPRPEGLNFQDLKNQLKHM	1229	P	3	1756		0.592593	0.0155944	83.729	72.674	83.729	-0.3933	57398000	0.592593	NaN	NaN	83.729	NaN	NaN
P15927	186	P15927	P15927	Replication protein A 32 kDa subunit	RPA2	KANSQPSAGRAPISNPGMSEAGNFGGNSFMP	1230	P	4	1756		0.872986	4.33499e-09	111.61	111.61	77.286	-0.70202	264520000	0.872986	NaN	0.826831	77.286	NaN	111.61
P16260	275	P16260	P16260	Graves disease carrier protein	SLC25A16	PFDVTRRRMQLGTVLPEFEKCLTMRDTMKYV	1237	P	4	1764		1	0.0101835	47.915	25.194	47.915	-4.4692	5745400	1	NaN	NaN	47.915	NaN	NaN
P16435	527	P16435	P16435	NADPH--cytochrome P450 reductase	POR	FVRKSQFRLPFKATTPVIMVGPGTGVAPFIG	1241	P	3	1774		0.998677	2.23885e-05	86.211	82.408	86.211	-0.37686	201380000	NaN	NaN	0.998677	NaN	NaN	86.211
P16615	975	P16615	P16615	Sarcoplasmic/endoplasmic reticulum calcium ATPase 2	ATP2A2	PLNVTQWLMVLKISLPVILMDETLKFVARNY	1244	P	2	1777		1	0.026372	64.04	6.0804	64.04	-3.2149	0	NaN	NaN	1	NaN	NaN	64.04
P16615;O14983	124;124	P16615	P16615	Sarcoplasmic/endoplasmic reticulum calcium ATPase 2;Sarcoplasmic/endoplasmic reticulum calcium ATPase 1	ATP2A2;ATP2A1	ERNAENAIEALKEYEPEMGKVYRQDRKSVQR	1245	P	3	1777		1	0.00328331	88.019	62.408	88.019	0.85085	337690000	1	NaN	NaN	88.019	NaN	NaN
P16989	272	P16989	P16989	Y-box-binding protein 3	YBX3	NRIQAGEIGEMKDGVPEGAQLQGPVHRNPTY	1248	P	4	1782		0.999359	0.00559899	48.867	34.995	48.867	-2.0227	89195000	0.999359	NaN	NaN	48.867	NaN	NaN
P16989	35	P16989	P16989	Y-box-binding protein 3	YBX3	TEAAAAAPQDPAPKSPVGSGAPQAAAPAPAA	1249	P	4	1782		0.850519	6.66611e-16	71.831	64.965	71.831	-1.5185	740760000	0.635423	NaN	0.850519	48.915	NaN	71.831
P16989	41	P16989	P16989	Y-box-binding protein 3	YBX3	APQDPAPKSPVGSGAPQAAAPAPAAHVAGNP	1250	P	4	1782		0.961691	6.66611e-16	71.831	64.965	71.831	-1.5185	740760000	0.870968	NaN	0.961691	48.915	NaN	71.831
P16989	46	P16989	P16989	Y-box-binding protein 3	YBX3	APKSPVGSGAPQAAAPAPAAHVAGNPGGDAA	1251	P	4	1782		0.961691	6.66611e-16	71.831	64.965	71.831	-1.5185	740760000	0.952729	NaN	0.961691	48.915	NaN	71.831
P16989	48	P16989	P16989	Y-box-binding protein 3	YBX3	KSPVGSGAPQAAAPAPAAHVAGNPGGDAAPA	1252	P	4	1782		0.961691	6.66611e-16	71.831	64.965	71.831	-1.5185	740760000	0.952729	NaN	0.961691	48.915	NaN	71.831
P16989	56	P16989	P16989	Y-box-binding protein 3	YBX3	PQAAAPAPAAHVAGNPGGDAAPAATGTAAAA	1253	P	4	1782		0.961691	6.66611e-16	71.831	64.965	71.831	-1.5185	740760000	0.952729	NaN	0.961691	48.915	NaN	71.831
P16989	62	P16989	P16989	Y-box-binding protein 3	YBX3	APAAHVAGNPGGDAAPAATGTAAAASLATAA	1254	P	4	1782		0.635423	5.69601e-07	48.915	44.842	48.915	-2.088	562560000	0.635423	NaN	NaN	48.915	NaN	NaN
P16989	256	P16989	P16989	Y-box-binding protein 3	YBX3	HVGQTFDRRSRVLPHPNRIQAGEIGEMKDGV	1255	P	5	1782		0.838795	6.53208e-05	56.021	46.521	56.021	0.01239	286760000	NaN	NaN	0.838795	NaN	NaN	56.021
P17098	3	P17098	P17098	Zinc finger protein 8	ZNF8	_____________MDPEDEGVAGVMSVGPPA	1257	P	2	1800		1	5.24713e-05	91.441	71.234	91.441	-1.8274	0	1	NaN	NaN	91.441	NaN	NaN
P17174	348	P17174	P17174	Aspartate aminotransferase, cytoplasmic	GOT1	TMRSELRARLEALKTPGTWNHITDQIGMFSF	1258	P	3	1802		0.999582	0.00183983	50.189	44.409	50.189	-3.2428	0	0.999582	NaN	NaN	50.189	NaN	NaN
P17535	33	P17535	P17535	Transcription factor jun-D	JUND	ASGSGGSFASPGRLFPGAPPTAAAGSMMKKD	1260	P	2	1814		1	0.00494092	48.741	18.997	48.741	1.1067	19413000	1	NaN	NaN	48.741	NaN	NaN
P17535	36	P17535	P17535	Transcription factor jun-D	JUND	SGGSFASPGRLFPGAPPTAAAGSMMKKDALT	1261	P	2	1814		1	0.00494092	48.741	18.997	48.741	1.1067	19413000	1	NaN	NaN	48.741	NaN	NaN
P17535	37	P17535	P17535	Transcription factor jun-D	JUND	GGSFASPGRLFPGAPPTAAAGSMMKKDALTL	1262	P	2	1814		1	0.00494092	48.741	18.997	48.741	1.1067	19413000	1	NaN	NaN	48.741	NaN	NaN
P17568	19	P17568	P17568	NADH dehydrogenase [ubiquinone] 1 beta subcomplex subunit 7	NDUFB7	HLVRRYLGDASVEPDPLQMPTFPPDYGFPER	1264	P	3	1816		0.565763	0.0317763	55.994	50.019	55.994	1.0318	49532000	NaN	NaN	0.565763	NaN	NaN	55.994
P17812	437	P17812	P17812	CTP synthase 1	CTPS1	TEFDPTTSHPVVVDMPEHNPGQMGGTMRLGK	1266	P	4	1823		0.745056	1.35073e-06	51.868	51.868	51.868	-0.47756	23715000	0.745056	0	NaN	51.868	NaN	NaN
P17844;Q92841	271;348	P17844;Q92841	P17844	Probable ATP-dependent RNA helicase DDX5;Probable ATP-dependent RNA helicase DDX17	DDX5;DDX17	MGFEPQIRKIVDQIRPDRQTLMWSATWPKEV	1268	P	4	1824;6468		0.999926	0.00695608	60.034	41.315	60.034	-0.32552	125760000	0.999926	NaN	NaN	60.034	NaN	NaN
P17858	329	P17858	P17858	ATP-dependent 6-phosphofructokinase, liver type	PFKL	SKMGMEAVMALLEATPDTPACVVTLSGNQSV	1270	P	3	1825		0.975183	0.000472474	51.296	51.296	51.296	-0.50122	27884000	0.975183	NaN	NaN	51.296	NaN	NaN
P17980	205	P17980	P17980	26S protease regulatory subunit 6A	PSMC3	GLDKQIQELVEAIVLPMNHKEKFENLGIQPP	1272	P	5	1829		0.997516	6.39315e-07	78.867	78.867	78.867	-0.11665	136580000	0.997516	NaN	NaN	78.867	NaN	NaN
P17987	226	P17987	P17987	T-complex protein 1 subunit alpha	TCP1	ISGYALNCVVGSQGMPKRIVNAKIACLDFSL	1274	P	4	1830		1	0.000116486	63.491	60.952	63.491	1.1154	39895000	NaN	NaN	1	NaN	NaN	63.491
P17987	4	P17987	P17987	T-complex protein 1 subunit alpha	TCP1	____________MEGPLSVFGDRSTGETIRS	1275	P	4	1830		1	0.000576499	44.615	39.349	44.615	1.4084	17060000	1	NaN	NaN	44.615	NaN	NaN
P18031	89	P18031	P18031	Tyrosine-protein phosphatase non-receptor type 1	PTPN1	MEEAQRSYILTQGPLPNTCGHFWEMVWEQKS	1277	P	3	1831		0.795321	0.0112011	48.641	42.413	48.641	-2.192	59554000	NaN	NaN	0.795321	NaN	NaN	48.641
P18858	542	P18858	P18858	DNA ligase 1	LIG1	RLPEHCKLSPGIPLKPMLAHPTRGISEVLKR	1295	P	3	1853		0.997092	0.0133356	74.141	74.141	70.784	0.0099315	454170000	0.997092	NaN	0.991827	70.784	NaN	74.141
P19022	813	P19022	P19022	Cadherin-2	CDH2	PDAIKPVGIRRMDERPIHAEPQYPVRSAAPH	1296	P	4	1857		0.99972	0.00120195	77.146	64.861	77.146	-0.05279	131190000	0.998497	NaN	0.99972	45.434	NaN	77.146
P19338	321	P19338	P19338	Nucleolin	NCL	AFNLFVGNLNFNKSAPELKTGISDVFAKNDL	1299	P	2	1861		1	9.4294e-13	130.39	108.73	130.39	2.6706	0	1	NaN	NaN	130.39	NaN	NaN
P19525	457	P19525	P19525	Interferon-induced, double-stranded RNA-activated protein kinase	EIF2AK2	DGKRTRSKGTLRYMSPEQISSQDYGKEVDLY	1301	P	3	1871		1	0.0337216	55.841	51.45	55.841	-0.95538	4128600	NaN	NaN	1	NaN	NaN	55.841
P19623	29	P19623	P19623	Spermidine synthase	SRM	AAIREGWFRETCSLWPGQALSLQVEQLLHHR	1302	P	5	1876		1	7.60693e-05	69.398	63.035	69.398	1.3443	29345000	1	NaN	NaN	69.398	NaN	NaN
P19623	177	P19623	P19623	Spermidine synthase	SRM	QNQDAFDVIITDSSDPMGPAESLFKESYYQL	1303	P	3	1876		0.930375	0.000120038	81.65	78.769	81.65	-2.9727	14564000	NaN	NaN	0.930375	NaN	NaN	81.65
P19784	335	P19784	P19784	Casein kinase II subunit alpha'	CSNK2A2	MEHPYFYPVVKEQSQPCADNAVLSSGLTAAR	1305	P	3	1878		1	0.0027552	77.754	70.311	48.656	0.78951	73569000	1	0	0	77.754	NaN	NaN
P20020	1157	P20020	P20020	Plasma membrane calcium-transporting ATPase 1	ATP2B1	HNFMTHPEFRIEDSEPHIPLIDDTDAEDDAP	1309	P	5	1881		0.53508	4.40258e-08	77.825	76.517	76.976	-0.62042	37676000	0.497852	NaN	0.53508	77.825	NaN	76.976
P20265	23	P20265	P20265	POU domain, class 3, transcription factor 2	POU3F2	HYSLLTSSASIVHAEPPGGMQQGAGGYREAQ	1312	P	3	1887		0.526643	6.58419e-08	71.903	66.743	71.903	0.23371	20933000	0.526643	NaN	0.518361	71.903	NaN	50.261
P20290	23	P20290	P20290	Transcription factor BTF3	BTF3	AQADSRGRGRARGGCPGGEATLSQPPPRGGT	1313	P	3	1888		0.999997	0.0203841	61.477	57.698	61.477	-0.54127	54636000	0.999997	NaN	NaN	61.477	NaN	NaN
P20618	175	P20618	P20618	Proteasome subunit beta type-1	PSMB1	RDSFKAGGSASAMLQPLLDNQVGFKNMQNVE	1315	P	3	1896		0.989949	3.06808e-06	66.083	55.845	66.083	1.217	29478000	0.989949	NaN	NaN	66.083	NaN	NaN
P20810	504	P20810	P20810	Calpastatin	CAST	KDGKPLLPKESKEQLPPMSEDFLLDALSEDF	1318	P	4	1902		0.543809	4.81298e-12	80.43	73.565	80.43	-1.5509	20781000	0.543809	NaN	NaN	80.43	NaN	NaN
P20810	662	P20810	P20810	Calpastatin	CAST	DQDPIDALSGDLDSCPSTTETSQNTAKDKCK	1319	P	3	1902		0.996157	0.001078	61.958	59.953	61.958	0.065283	35608000	0.996157	NaN	NaN	61.958	NaN	NaN
P20810	590	P20810	P20810	Calpastatin	CAST	SDSLGQRQPDPDENKPMEDKVKEKAKAEHRD	1320	P	4	1902		0.916353	0.0125297	51.469	43.282	51.469	-0.075394	191990000	NaN	NaN	0.916353	NaN	NaN	51.469
P20936	440	P20936	P20936	Ras GTPase-activating protein 1	RASA1	HYRKEQIVEGYYLKEPVPMQDQEQVLNDTVD	1323	P	3	1906		0.68485	0.0195619	50.226	46.838	41.53	0.45907	40487000	NaN	NaN	0.68485	NaN	NaN	50.226
P21127;Q9UQ88	732;720	P21127;Q9UQ88	P21127	Cyclin-dependent kinase 11B;Cyclin-dependent kinase 11A	CDK11B;CDK11A	GLKHEYFRETPLPIDPSMFPTWPAKSEQQRV	1325	P	4	1908;9356		0.981133	6.83593e-05	65.893	56.431	65.893	1.0488	25403000	0.981133	NaN	NaN	65.893	NaN	NaN
P21333	1251	P21333	P21333	Filamin-A	FLNA	GGQPVPNFPSKLQVEPAVDTSGVQCYGPGIE	1329	P	3	1913		0.95597	0.01995	40.756	37.822	40.756	0.59205	7832900	0.95597	NaN	NaN	40.756	NaN	NaN
P21333	667	P21333	P21333	Filamin-A	FLNA	EDIRLSPFMADIRDAPQDFHPDRVKARGPGL	1331	P	5	1913		0.953121	0.00881179	49.089	41.555	49.089	-2.8362	45535000	0.953121	NaN	NaN	49.089	NaN	NaN
P21333	480	P21333	P21333	Filamin-A	FLNA	IPRSPYTVTVGQACNPSACRAVGRGLQPKGV	1332	P	2	1913		1	0.0047582	110.08	102.35	110.08	-0.33789	76355000	1	NaN	NaN	110.08	NaN	NaN
P21399	349	P21399	P21399	Cytoplasmic aconitate hydratase	ACO1	KKYLQAVGMFRDFNDPSQDPDFTQVVELDLK	1334	P	3	1916		0.882598	0.00136905	61.732	56.188	61.732	-1.1008	26265000	0.882598	NaN	NaN	61.732	NaN	NaN
P21675	552	P21675	P21675	Transcription initiation factor TFIID subunit 1	TAF1	KSRILLGKTGVIKEEPQQNMSQPEVKDPWNL	1335	P	4	1918		0.988374	0.00239762	48.204	44.091	48.204	-0.58552	10872000	NaN	NaN	0.988374	NaN	NaN	48.204
P22061	185	P22061	P22061	Protein-L-isoaspartate(D-aspartate) O-methyltransferase	PCMT1	IDQLKPGGRLILPVGPAGGNQMLEQYDKLQD	1346	P	3	1929		0.831416	0.00363546	70.569	59.464	63.337	1.9585	8961400000	0.554468	NaN	0.831416	70.569	NaN	63.337
P22102	487	P22102	P22102	Trifunctional purine biosynthetic protein adenosine-3;Phosphoribosylamine--glycine ligase;Phosphoribosylformylglycinamidine cyclo-ligase;Phosphoribosylglycinamide formyltransferase	GART	GFAGLFDLKAAGFKDPLLASGTDGVGTKLKI	1349	P	3	1932		1	0.0239847	57.482	46.824	57.482	2.3601	15254000	1	NaN	NaN	57.482	NaN	NaN
P22102	238	P22102	P22102	Trifunctional purine biosynthetic protein adenosine-3;Phosphoribosylamine--glycine ligase;Phosphoribosylformylglycinamidine cyclo-ligase;Phosphoribosylglycinamide formyltransferase	GART	EGDGGPNTGGMGAYCPAPQVSNDLLLKIKDT	1350	P	3	1932		0.779039	0.000575213	51.566	49.302	51.566	-1.0597	26879000	0.779039	NaN	NaN	51.566	NaN	NaN
P22234	138	P22234	P22234	Multifunctional protein ADE2;Phosphoribosylaminoimidazole-succinocarboxamide synthase;Phosphoribosylaminoimidazole carboxylase	PAICS	PPKVELFFKDDANNDPQWSEEQLIAAKFCFA	1355	P	2	1933		1	0.0143427	64.565	53.621	64.565	-3.2746	0	1	NaN	NaN	64.565	NaN	NaN
P22307	542	P22307	P22307	Non-specific lipid-transfer protein	SCP2	GNMGLAMKLQNLQLQPGNAKL__________	1356	P	2	1935		1	0.00940002	81.594	62.463	81.594	-0.31212	0	NaN	NaN	1	NaN	NaN	81.594
P22314	659	P22314	P22314	Ubiquitin-like modifier-activating enzyme 1	UBA1	TLQWARDEFEGLFKQPAENVNQYLTDPKFVE	1361	P	3	1936		0.980559	0.0126197	47.191	39.875	47.191	-3.8819	19250000	NaN	NaN	0.980559	NaN	NaN	47.191
P22314	37	P22314	P22314	Ubiquitin-like modifier-activating enzyme 1	UBA1	NCSPAQSVLSEVPSVPTNGMAKNGSEADIDE	1362	P	3	1936		0.792513	0.0240772	41.763	36.057	41.763	0.19148	7660800	NaN	NaN	0.792513	NaN	NaN	41.763
P22314	272	P22314	P22314	Ubiquitin-like modifier-activating enzyme 1	UBA1	VELNGNQPMEIKVLGPYTFSICDTSNFSDYI	1363	P	3	1936		1	0.00742489	56.936	54.581	56.936	-0.81318	4100100	1	NaN	NaN	56.936	NaN	NaN
P22570	482	P22570	P22570	NADPH:adrenodoxin oxidoreductase, mitochondrial	FDXR	ARGQGTGKPREKLVDPQEMLRLLGH______	1366	P	2	1942		1	0.0277979	134.25	91.911	134.25	-2.013	18549000	NaN	NaN	1	NaN	NaN	134.25
P22626	93	P22626	P22626	Heterogeneous nuclear ribonucleoproteins A2/B1	HNRNPA2B1	AMAARPHSIDGRVVEPKRAVAREESGKPGAH	1368	P	4	1945		0.558591	0.000850418	49.445	49.445	49.445	-0.6322	66130000	0.558591	NaN	NaN	49.445	NaN	NaN
P22626	338	P22626	P22626	Heterogeneous nuclear ribonucleoproteins A2/B1	HNRNPA2B1	GSRNMGGPYGGGNYGPGGSGGSGGYGGRSRY	1373	P	2	1945		1	0.000609378	94.487	90.691	94.487	-4.3281	8677000	0	0	1	NaN	NaN	94.487
P22830	192	P22830	P22830	Ferrochelatase, mitochondrial	FECH	MERDGLERAIAFTQYPQYSCSTTGSSLNAIY	1376	P	3	1950		1	0.00377065	55.128	52.141	55.128	0.32299	7053900	1	NaN	NaN	55.128	NaN	NaN
P23229	105	P23229	P23229	Integrin alpha-6;Integrin alpha-6 heavy chain;Integrin alpha-6 light chain;Processed integrin alpha-6	ITGA6	ARGPCTRIEFDNDADPTSESKEDQWMGVTVQ	1382	P	3	1954		0.9999	0.00583465	43.068	41.322	41.734	-4.2121	7120200	NaN	NaN	0.9999	NaN	NaN	43.068
P23246	650	P23246	P23246	Splicing factor, proline- and glutamine-rich	SFPQ	GGGGGIGYEANPGVPPATMSGSMMGSDMRTE	1385	P	3	1955		0.881989	4.03377e-09	66.479	66.479	50.757	-0.75429	274400000	0.881989	NaN	0.875332	50.757	NaN	66.479
P23258;Q9NRH3	275;275	P23258	P23258	Tubulin gamma-1 chain;Tubulin gamma-2 chain	TUBG1;TUBG2	LIPTPRLHFLMTGYTPLTTDQSVASVRKTTV	1389	P	3	1956		1	0.0336578	45.696	31.824	45.696	-0.17947	3624900	1	NaN	NaN	45.696	NaN	NaN
P23368	414	P23368	P23368	NAD-dependent malic enzyme, mitochondrial	ME2	FTPDVIRAMASINERPVIFALSNPTAQAECT	1391	P	4	1959		1	0.0327068	42.865	38.868	42.865	-0.24465	2363800	1	NaN	NaN	42.865	NaN	NaN
P23368	422	P23368	P23368	NAD-dependent malic enzyme, mitochondrial	ME2	MASINERPVIFALSNPTAQAECTAEEAYTLT	1392	P	4	1959		1	2.71344e-05	61.228	57.075	42.865	-0.24465	10334000	1	NaN	NaN	61.228	NaN	NaN
P23368	180	P23368	P23368	NAD-dependent malic enzyme, mitochondrial	ME2	RILGLGDLGVYGMGIPVGKLCLYTACAGIRP	1393	P	3	1959		1	0.001321	104.33	98.792	104.33	-0.18632	783660000	NaN	NaN	1	NaN	NaN	104.33
P23378	70	P23378	P23378	Glycine dehydrogenase (decarboxylating), mitochondrial	GLDC	RLLPRHDDFARRHIGPGDKDQREMLQTLGLA	1394	P	4	1960		1	0.000194637	80.359	68.163	79.558	0.14949	238540000	1	NaN	1	80.359	NaN	79.558
P23396	234	P23396	P23396	40S ribosomal protein S3	RPS3	PTTPISEQKGGKPEPPAMPQPVPTA______	1399	P	2	1962		0.775478	0.00948051	89.301	83.329	89.301	-0.44573	24596000	0.775478	NaN	NaN	89.301	NaN	NaN
P23526	124	P23526	P23526	Adenosylhomocysteinase	AHCY	EYLWCIEQTLYFKDGPLNMILDDGGDLTNLI	1404	P	5	1972		0.999837	0.00293152	44.05	42.101	44.05	-0.21762	15510000	0.999837	NaN	NaN	44.05	NaN	NaN
P23634	10	P23634	P23634	Plasma membrane calcium-transporting ATPase 4	ATP2B4	______MTNPSDRVLPANSMAESREGDFGCT	1407	P	2	1976		0.999908	0.0202728	54.343	38.089	54.343	0.33003	26839000	NaN	NaN	0.999908	NaN	NaN	54.343
P23921	403	P23921	P23921	Ribonucleoside-diphosphate reductase large subunit	RRM1	QLWYAIIESQTETGTPYMLYKDSCNRKSNQQ	1408	P	3	1984		1	0.000674471	67.864	61.5	67.864	-0.7364	41884000	NaN	NaN	1	NaN	NaN	67.864
P23921	603	P23921	P23921	Ribonucleoside-diphosphate reductase large subunit	RRM1	IAKYGIRNSLLIAPMPTASTAQILGNNESIE	1412	P	3	1984		0.555331	7.58296e-07	94.261	87.685	94.261	0.73466	1402800000	0.540417	NaN	0.555331	76.063	NaN	94.261
P24928	1921	P24928	P24928	DNA-directed RNA polymerase II subunit RPB1	POLR2A	SPKYSPTSPTYSPTSPKYSPTSPTYSPTSPK	1423	P	3	1997		0.915382	0.0275131	45.611	33.98	45.611	-1.36	11890000	NaN	NaN	0.915382	NaN	NaN	45.611
P24928	1925	P24928	P24928	DNA-directed RNA polymerase II subunit RPB1	POLR2A	SPTSPTYSPTSPKYSPTSPTYSPTSPKGSTY	1424	P	3	1997		0.915382	0.0275131	45.611	33.98	45.611	-1.36	11890000	NaN	NaN	0.915382	NaN	NaN	45.611
P24928	1928	P24928	P24928	DNA-directed RNA polymerase II subunit RPB1	POLR2A	SPTYSPTSPKYSPTSPTYSPTSPKGSTYSPT	1425	P	3	1997		0.915032	0.0275131	45.611	33.98	45.611	-1.36	11890000	NaN	NaN	0.915032	NaN	NaN	45.611
P24928	1932	P24928	P24928	DNA-directed RNA polymerase II subunit RPB1	POLR2A	SPTSPKYSPTSPTYSPTSPKGSTYSPTSPGY	1426	P	3	1997		0.913695	0.0275131	45.611	33.98	45.611	-1.36	11890000	NaN	NaN	0.913695	NaN	NaN	45.611
P24928	1935	P24928	P24928	DNA-directed RNA polymerase II subunit RPB1	POLR2A	SPKYSPTSPTYSPTSPKGSTYSPTSPGYSPT	1427	P	3	1997		0.693184	0.0275131	45.611	33.98	45.611	-1.36	11890000	NaN	NaN	0.693184	NaN	NaN	45.611
P24941	234	P24941	P24941	Cyclin-dependent kinase 2	CDK2	LGTPDEVVWPGVTSMPDYKPSFPKWARQDFS	1430	P	3	1998		0.590501	0.00257701	56.72	46.462	56.72	0.44451	25410000	0	NaN	0.590501	NaN	NaN	56.72
P25205	465	P25205	P25205	DNA replication licensing factor MCM3	MCM3	AAANPVYGRYDQYKTPMENIGLQDSLLSRFD	1431	P	3	2002		1	0.000472845	94.017	77.332	94.017	0.92656	111990000	1	NaN	1	52.862	NaN	94.017
P25205	510	P25205	P25205	DNA replication licensing factor MCM3	MCM3	REISDHVLRMHRYRAPGEQDGDAMPLGSAVD	1432	P	4	2002		0.980536	4.29713e-11	100.19	92.078	100.19	-0.065647	155040000	NaN	NaN	0.980536	NaN	NaN	100.19
P25325	71	P25325	P25325	3-mercaptopyruvate sulfurtransferase	MPST	GAAFFDIDQCSDRTSPYDHMLPGAEHFAEYA	1433	P	4	2004		0.970981	0.0034669	56.055	52.528	56.055	-1.2834	318500000	0.970981	NaN	NaN	56.055	NaN	NaN
P25440	36	P25440	P25440	Bromodomain-containing protein 2	BRD2	GLGPEAAAPGKRIRKPSLLYEGFESPTMASV	1437	P	3	2007		0.661283	4.16417e-05	58.257	54.445	58.257	-0.80694	19510000	0.661283	NaN	NaN	58.257	NaN	NaN
P25440	46	P25440	P25440	Bromodomain-containing protein 2	BRD2	KRIRKPSLLYEGFESPTMASVPALQLTPANP	1438	P	3	2007		0.867254	7.72892e-08	79.68	72.001	79.68	1.2675	80632000	0.867254	NaN	0.716098	79.68	NaN	65.058
P25440	290	P25440	P25440	Bromodomain-containing protein 2	BRD2	KKKGVKRKADTTTPTPTAILAPGSPASPPGS	1439	P	2	2007		0.613703	0.00279094	44.577	33.963	44.577	-0.10858	0	NaN	NaN	0.613703	NaN	NaN	44.577
P26358	574	P26358	P26358	DNA (cytosine-5)-methyltransferase 1	DNMT1	EQVESYDEAGDSDEQPIFLTPCMRDLIKLAG	1458	P	4	2023		0.555625	0.000545331	48.449	46.904	48.449	-1.4973	37579000	0.554719	NaN	0.555625	47.96	NaN	48.449
P26368	117	P26368	P26368	Splicing factor U2AF 65 kDa subunit	U2AF2	ITPMQYKAMQAAGQIPATALLPTMTPDGLAV	1461	P	3	2025		0.518543	0.000371006	42.262	42.262	40.937	-1.0031	527580000	NaN	NaN	0.518543	NaN	NaN	42.262
P26368	229	P26368	P26368	Splicing factor U2AF 65 kDa subunit	U2AF2	FDGIIFQGQSLKIRRPHDYQPLPGMSENPSV	1463	P	4	2025		0.549011	0.00179304	44.75	39.941	44.75	-0.27579	172140000	0.549011	NaN	NaN	44.75	NaN	NaN
P26368	242	P26368	P26368	Splicing factor U2AF 65 kDa subunit	U2AF2	RRPHDYQPLPGMSENPSVYVPGVVSTVVPDS	1466	P	4	2025		0.553945	1.64098e-05	86.194	80.678	86.194	-0.33916	110660000	NaN	NaN	0.553945	NaN	NaN	86.194
P26368	95	P26368	P26368	Splicing factor U2AF 65 kDa subunit	U2AF2	PRHEKKKKVRKYWDVPPPGFEHITPMQYKAM	1467	P	3	2025		0.898713	0.0150683	72.21	67.486	72.21	-0.38149	79062000	0.898713	0	NaN	72.21	NaN	NaN
P26368	96	P26368	P26368	Splicing factor U2AF 65 kDa subunit	U2AF2	RHEKKKKVRKYWDVPPPGFEHITPMQYKAMQ	1468	P	3	2025		0.855809	0.0150683	72.21	67.486	72.21	-0.38149	79062000	0.855809	0	NaN	72.21	NaN	NaN
P26368	157	P26368	P26368	Splicing factor U2AF 65 kDa subunit	U2AF2	SQMTRQARRLYVGNIPFGITEEAMMDFFNAQ	1470	P	2	2025		1	0.00243608	67.358	56.873	67.358	-1.4797	57160000	1	NaN	NaN	67.358	NaN	NaN
P26599	125	P26599	P26599	Polypyrimidine tract-binding protein 1	PTBP1	MVNYYTSVTPVLRGQPIYIQFSNHKELKTDS	1472	P	5	2031		0.999981	0.00234065	52.909	45.721	52.909	-3.5572	8736000	NaN	NaN	0.999981	NaN	NaN	52.909
P26599	28	P26599	P26599	Polypyrimidine tract-binding protein 1	PTBP1	KRGSDELFSTCVTNGPFIMSSNSASAANGND	1473	P	3	2031		1	1.40882e-08	130.72	125.91	130.72	-0.38225	48812000	1	NaN	1	53.266	NaN	130.72
P26639	654	P26639	P26639	Threonine--tRNA ligase, cytoplasmic	TARS	QQFHDAKFMADIDLDPGCTLNKKIRNAQLAQ	1476	P	2	2032		1	0.0128136	72.321	65.661	72.321	-0.96724	15651000	1	NaN	NaN	72.321	NaN	NaN
P26639	102	P26639	P26639	Threonine--tRNA ligase, cytoplasmic	TARS	LPDGKQVDAESWKTTPYQIACGISQGLADNT	1478	P	3	2032		1	0.00542084	55.127	48.138	55.127	-0.085662	16500000	1	NaN	NaN	55.127	NaN	NaN
P26640	295	P26640	P26640	Valine--tRNA ligase	VARS	YDLPTPPGEKKDVSGPMPDSYSPRYVEAAWY	1481	P	2	2033		0.999629	0.000420763	104.79	85.552	104.79	-0.087089	233070000	0.845079	NaN	0.999629	103.68	NaN	104.79
P26640	311	P26640	P26640	Valine--tRNA ligase	VARS	MPDSYSPRYVEAAWYPWWEQQGFFKPEYGRP	1489	P	4	2033		0.99853	0.0033699	47.919	46.223	47.919	-2.6072	15777000	0.99853	NaN	NaN	47.919	NaN	NaN
P27448	470	P27448	P27448	MAP/microtubule affinity-regulating kinase 3	MARK3	SSGSAVGGKGIAPASPMLGNASNPNKADIPE	1499	P	3	2042		0.999655	8.35958e-08	114.04	97.736	114.04	0.26268	38239000	NaN	NaN	0.999655	NaN	NaN	114.04
P27540	349	P27540	P27540	Aryl hydrocarbon receptor nuclear translocator	ARNT	KFCLVAIGRLQVTSSPNCTDMSNVCQPTEFI	1501	P	3	2045		0.999997	9.76223e-06	90.884	84.308	90.884	1.1558	8114800	0.999997	NaN	NaN	90.884	NaN	NaN
P27694	144	P27694	P27694	Replication protein A 70 kDa DNA-binding subunit;Replication protein A 70 kDa DNA-binding subunit, N-terminally processed	RPA1	PPAPAASPAASSRPQPQNGSSGMGSTVSKAY	1504	P	5	2048		0.775868	1.84533e-05	47.518	44.234	47.518	-1.3266	45727000	NaN	NaN	0.775868	NaN	NaN	47.518
P27694	288	P27694	P27694	Replication protein A 70 kDa DNA-binding subunit;Replication protein A 70 kDa DNA-binding subunit, N-terminally processed	RPA1	KNDYEMTFNNETSVMPCEDDHHLPTVQFDFT	1505	P	4	2048		0.826034	0.00058781	50.706	50.706	50.706	-1.0858	27409000	NaN	NaN	0.826034	NaN	NaN	50.706
P27708	1633	P27708	P27708	CAD protein;Glutamine-dependent carbamoyl-phosphate synthase;Aspartate carbamoyltransferase;Dihydroorotase	CAD	KEEILLIKAAKARGLPVTCEVAPHHLFLSHD	1506	P	4	2051		0.994366	0.00103221	60.735	52.742	60.735	-0.71604	135090000	0.994366	NaN	NaN	60.735	NaN	NaN
P27708	1765	P27708	P27708	CAD protein;Glutamine-dependent carbamoyl-phosphate synthase;Aspartate carbamoyltransferase;Dihydroorotase	CAD	VEVDLEHEWTIPSHMPFSKAHWTPFEGQKVK	1508	P	5	2051		0.999797	5.65047e-05	58.722	53.816	58.722	-0.51524	182490000	0.999593	NaN	0.999797	48.76	NaN	58.722
P27708	1885	P27708	P27708	CAD protein;Glutamine-dependent carbamoyl-phosphate synthase;Aspartate carbamoyltransferase;Dihydroorotase	CAD	EKSSRKVAEPELMGTPDGTCYPPPPVPRQAS	1511	P	3	2051		0.518127	0.0272048	46.027	42.739	46.027	-0.20792	12829000	0	NaN	0.518127	NaN	NaN	46.027
P27708	796	P27708	P27708	CAD protein;Glutamine-dependent carbamoyl-phosphate synthase;Aspartate carbamoyltransferase;Dihydroorotase	CAD	RMVDENCVGFDHTVKPVSDMELETPTDKRIF	1515	P	4	2051		0.986109	0.00178657	51.22	42.252	51.22	-0.53918	22030000	NaN	NaN	0.986109	NaN	NaN	51.22
P27797	250	P27797	P27797	Calreticulin	CALR	DWDKPEHIPDPDAKKPEDWDEEMDGEWEPPV	1520	P	3	2052		0.999681	0.014741	64.488	62.265	64.488	-0.16782	87123000	0.999681	NaN	NaN	64.488	NaN	NaN
P28066	151	P28066	P28066	Proteasome subunit alpha type-5	PSMA5	PFGVALLFGGVDEKGPQLFHMDPSGTFVQCD	1532	P	3	2057		0.99933	0.00234946	69.737	61.243	69.737	-0.73749	86899000	0.775644	NaN	0.99933	52.784	NaN	69.737
P28288	509	P28288	P28288	ATP-binding cassette sub-family D member 3	ABCD3	GGRLTKPERGKLFYVPQRPYMTLGTLRDQVI	1536	P	4	2061		0.544573	0.00538896	53.444	45.722	53.444	-0.91225	32842000	0.544573	NaN	NaN	53.444	NaN	NaN
P28331	235	P28331	P28331	NADH-ubiquinone oxidoreductase 75 kDa subunit, mitochondrial	NDUFS1	GNIIDICPVGALTSKPYAFTARPWETRKTES	1540	P	4	2066		0.999797	0.000323078	56.164	51.763	56.164	1.4511	8968500	0.999797	NaN	NaN	56.164	NaN	NaN
P28331	242	P28331	P28331	NADH-ubiquinone oxidoreductase 75 kDa subunit, mitochondrial	NDUFS1	PVGALTSKPYAFTARPWETRKTESIDVMDAV	1541	P	4	2066		0.999797	0.000323078	56.164	51.763	56.164	1.4511	8968500	0.999797	NaN	NaN	56.164	NaN	NaN
P28340	942	P28340	P28340	DNA polymerase delta catalytic subunit	POLD1	ISAAKGVAAYMKSEDPLFVLEHSLPIDTQYY	1542	P	5	2067		0.997498	3.01336e-07	95.099	93.678	95.099	0.51687	738980000	0.997498	NaN	0.987356	95.099	NaN	61.228
P28482	328	P28482	P28482	Mitogen-activated protein kinase 1	MAPK1	LEQYYDPSDEPIAEAPFKFDMELDDLPKEKL	1545	P	4	2072		0.969728	2.17025e-07	59.678	56.708	57.14	-0.78771	90557000	0.76064	NaN	0.969728	59.678	NaN	57.14
P29320	217	P29320	P29320	Ephrin type-A receptor 3	EPHA3	CPFTVKNLAMFPDTVPMDSQSLVEVRGSCVN	1550	P	3	2087		0.874372	0.00144648	64.203	64.203	64.203	-1.1774	21895000	0.874372	NaN	NaN	64.203	NaN	NaN
P29401	426	P29401	P29401	Transketolase	TKT	NLCGSHCGVSIGEDGPSQMALEDLAMFRSVP	1558	P	4	2095		1	1.978e-06	54.375	50.059	48.388	-1.9822	39168000	NaN	NaN	1	NaN	NaN	54.375
P29966	96	P29966	P29966	Myristoylated alanine-rich C-kinase substrate	MARCKS	SPSAAEKGEPAAAAAPEAGASPVEKEAPAEG	1560	P	4	2103		0.988694	8.34267e-06	46.14	45.102	46.14	-0.71201	21563000	NaN	NaN	0.988694	NaN	NaN	46.14
P29966	102	P29966	P29966	Myristoylated alanine-rich C-kinase substrate	MARCKS	KGEPAAAAAPEAGASPVEKEAPAEGEAAEPG	1561	P	4	2103		0.988693	8.34267e-06	46.14	45.102	46.14	-0.71201	21563000	NaN	NaN	0.988693	NaN	NaN	46.14
P29966	108	P29966	P29966	Myristoylated alanine-rich C-kinase substrate	MARCKS	AAAPEAGASPVEKEAPAEGEAAEPGSPTAAE	1562	P	4	2103		0.988187	8.34267e-06	46.14	45.102	46.14	-0.71201	21563000	NaN	NaN	0.988187	NaN	NaN	46.14
P29966	116	P29966	P29966	Myristoylated alanine-rich C-kinase substrate	MARCKS	SPVEKEAPAEGEAAEPGSPTAAEGEAASAAS	1563	P	4	2103		0.988187	8.34267e-06	46.14	45.102	46.14	-0.71201	21563000	NaN	NaN	0.988187	NaN	NaN	46.14
P29966	119	P29966	P29966	Myristoylated alanine-rich C-kinase substrate	MARCKS	EKEAPAEGEAAEPGSPTAAEGEAASAASSTS	1564	P	4	2103		0.954313	8.34267e-06	46.14	45.102	46.14	-0.71201	21563000	NaN	NaN	0.954313	NaN	NaN	46.14
P30043	83	P30043	P30043	Flavin reductase (NADPH)	BLVRB	QDAVIVLLGTRNDLSPTTVMSEGARNIVAAM	1568	P	3	2109		1	0.00156319	61.415	50.804	61.415	0.055676	6937200	1	NaN	NaN	61.415	NaN	NaN
P30086	21	P30086	P30086	Phosphatidylethanolamine-binding protein 1;Hippocampal cholinergic neurostimulating peptide	PEBP1	SKWSGPLSLQEVDEQPQHPLHVTYAGAAVDE	1576	P	4	2118		0.874576	0.00197424	56.709	46.997	56.709	1.2447	23151000	0.874576	0	NaN	56.709	NaN	NaN
P30520	406	P30520	P30520	Adenylosuccinate synthetase isozyme 2	ADSS	NQEVLNKVEVQYKTLPGWNTDISNARAFKEL	1589	P	2	2134		1	0.0278138	94.297	67.782	94.297	-1.8402	9118300	1	NaN	NaN	94.297	NaN	NaN
P30626	187	P30626	P30626	Sorcin	SRI	SFRRRDTAQQGVVNFPYDDFIQCVMSV____	1593	P	2	2141		1	0.00511862	59.607	52.879	59.607	3.3838	12582000	1	NaN	1	59.607	NaN	54.857
P30837	188	P30837	P30837	Aldehyde dehydrogenase X, mitochondrial	ALDH1B1	HEPVGVCGQIIPWNFPLVMQGWKLAPALATG	1595	P	3	2144		0.994742	0.00153033	61.703	49.737	61.703	1.9216	173130000	NaN	NaN	0.994742	NaN	NaN	61.703
P31040	404	P31040	P31040	Succinate dehydrogenase [ubiquinone] flavoprotein subunit, mitochondrial	SDHA	IFAGVDVTKEPIPVLPTVHYNMGGIPTNYKG	1599	P	3	2146		0.985586	0.00499602	57.484	52.475	57.484	-1.1375	59738000	0.985586	NaN	NaN	57.484	NaN	NaN
P31040	658	P31040	P31040	Succinate dehydrogenase [ubiquinone] flavoprotein subunit, mitochondrial	SDHA	PVIDKTLNEADCATVPPAIRSY_________	1600	P	3	2146		0.777746	0.0284247	58.938	52.643	58.938	3.6179	0	NaN	NaN	0.777746	NaN	NaN	58.938
P31751	119	P31751	P31751	RAC-beta serine/threonine-protein kinase	AKT2	QMVANSLKQRAPGEDPMDYKCGSPSDSSTTE	1605	P	2	2166		1	0.0109749	126.07	121.16	126.07	0.10589	30961000	1	NaN	NaN	126.07	NaN	NaN
P31930	408	P31930	P31930	Cytochrome b-c1 complex subunit 1, mitochondrial	UQCRC1	NILRNALVSHLDGTTPVCEDIGRSLLTYGRR	1606	P	3	2167		1	0.000820691	80.585	71.005	58.848	0.055449	528240000	1	NaN	NaN	80.585	NaN	NaN
P31930	454	P31930	P31930	Cytochrome b-c1 complex subunit 1, mitochondrial	UQCRC1	SVVREICSKYIYDQCPAVAGYGPIEQLPDYN	1607	P	3	2167		0.999496	0.0133898	59.814	53.832	59.814	0.46537	73995000	0.999496	NaN	NaN	59.814	NaN	NaN
P31939	328	P31939	P31939	Bifunctional purine biosynthesis protein PURH;Phosphoribosylaminoimidazolecarboxamide formyltransferase;IMP cyclohydrolase	ATIC	SSFGDFVALSDVCDVPTAKIISREVSDGIIA	1610	P	2	2169		1	0.017201	60.08	56.136	60.08	-1.2851	13137000	1	NaN	NaN	60.08	NaN	NaN
P31939	148	P31939	P31939	Bifunctional purine biosynthesis protein PURH;Phosphoribosylaminoimidazolecarboxamide formyltransferase;IMP cyclohydrolase	ATIC	RAAAKNHARVTVVCEPEDYVVVSTEMQSSES	1611	P	3	2169		1	0.000327385	69.72	69.238	69.72	-0.15878	119570000	1	NaN	NaN	69.72	NaN	NaN
P32322	35	P32322	P32322	Pyrroline-5-carboxylate reductase 1, mitochondrial	PYCR1	TAAGVLAAHKIMASSPDMDLATVSALRKMGV	1620	P	3	2183		1	0.0163665	80.638	67.408	80.638	-0.21074	168720000	NaN	NaN	1	NaN	NaN	80.638
P33176	176	P33176	P33176	Kinesin-1 heavy chain	KIF5B	RVPYVKGCTERFVCSPDEVMDTIDEGKSNRH	1624	P	2	2190		1	0.019234	65.574	52.147	65.574	0.12008	4351600	1	NaN	NaN	65.574	NaN	NaN
P33176	109	P33176	P33176	Kinesin-1 heavy chain	KIF5B	TMEGKLHDPEGMGIIPRIVQDIFNYIYSMDE	1625	P	3	2190		0.904013	0.00355008	82.877	67.723	82.877	-0.35018	0	0	NaN	0.904013	NaN	NaN	82.877
P33240	485	P33240	P33240	Cleavage stimulation factor subunit 2	CSTF2	PVPGPRGPIPSGMQGPSPINMGAVVPQGSRQ	1628	P	3	2191		0.517305	0.0172236	42.454	42.454	41.763	-0.12925	47753000	NaN	0	0.517305	NaN	NaN	42.454
P33552	25	P33552	P33552	Cyclin-dependent kinases regulatory subunit 2	CKS2	DKYFDEHYEYRHVMLPRELSKQVPKTHLMSE	1635	P	4	2195		1	0.00529092	64.394	59.076	46.408	-0.37968	52434000	1	NaN	1	46.408	NaN	64.394
P33991	191	P33991	P33991	DNA replication licensing factor MCM4	MCM4	PLAKEEENVGIDITEPLYMQRLGEINVIGEP	1637	P	2	2200		1	0.02656	95.401	92.359	95.401	-0.33237	121330000	1	NaN	1	88.187	NaN	95.401
P33993	116	P33993	P33993	DNA replication licensing factor MCM7	MCM7	VYIEHRLMMEQRSRDPGMVRSPQNQYPAELM	1645	P	4	2202		0.84537	0.00814887	54.658	54.658	49.089	-0.085222	35530000	NaN	NaN	0.84537	NaN	NaN	54.658
P34059	381	P34059	P34059	N-acetylgalactosamine-6-sulfatase	GALNS	LNLLPTLLQGRLMDRPIFYYRGDTLMAATLG	1646	P	4	2203		1	0.00206548	59.814	47.618	59.814	3.3061	18444000	NaN	NaN	1	NaN	NaN	59.814
P34949	343	P34949	P34949	Mannose-6-phosphate isomerase	MPI	RSQEDPYLSIYDPPVPDFTIMKTEVPGSVTE	1654	P	2	2213		0.935886	5.10832e-08	122.56	117.02	122.56	-0.96914	269360000	0.935886	NaN	0.866613	122.56	NaN	102.26
P35222	100	P35222	P35222	Catenin beta-1	CTNNB1	QYAMTRAQRVRAAMFPETLDEGMQIPSTQFD	1656	P	3	2218		0.980794	0.00102821	52.122	50.032	52.122	-0.27663	47098000	0.980794	NaN	NaN	52.122	NaN	NaN
P35244	58	P35244	P35244	Replication protein A 14 kDa subunit	RPA3	LSDGEGKNGTIELMEPLDEEISGIVEVVGRV	1660	P	4	2224		1	5.99416e-05	55.895	50.576	55.895	-2.1169	102980000	NaN	NaN	1	NaN	NaN	55.895
P35250	37	P35250	P35250	Replication factor C subunit 2	RFC2	PAFSKAPGSAGHYELPWVEKYRPVKLNEIVG	1661	P	3	2226		0.999997	0.00685929	66.673	50.855	66.673	-0.30317	24038000	0.999997	NaN	NaN	66.673	NaN	NaN
P35250	212	P35250	P35250	Replication factor C subunit 2	RFC2	QILTRLMNVIEKERVPYTDDGLEAIIFTAQG	1662	P	4	2226		1	6.70472e-05	79.388	73.902	79.388	0.83327	496400000	NaN	NaN	1	NaN	NaN	79.388
P35251	945	P35251	P35251	Replication factor C subunit 1	RFC1	NWSLLPAQAIYASVLPGELMRGYMTQFPTFP	1666	P	3	2227		0.999998	0.0160107	59.282	39.904	59.282	0.87284	121410000	NaN	NaN	0.999998	NaN	NaN	59.282
P35520	12	P35520	P35520	Cystathionine beta-synthase	CBS	____MPSETPQAEVGPTGCPHRSGPHSAKGS	1668	P	3	2232		0.557378	0.00543752	62.525	51.15	62.525	-0.26733	86693000	0.557378	NaN	NaN	62.525	NaN	NaN
P35573	1061	P35573	P35573	Glycogen debranching enzyme;4-alpha-glucanotransferase;Amylo-alpha-1,6-glucosidase	AGL	QLCGVGKFPSLPILSPALMDVPYRLNEITKE	1671	P	4	2236		0.879452	0.0291778	44.615	39.24	44.615	0.56064	34109000	0.879452	NaN	NaN	44.615	NaN	NaN
P35606	820	P35606	P35606	Coatomer subunit beta'	COPB2	FVVEEWVKETHADLWPAKQYPLVTPNEERNV	1678	P	5	2239		0.827564	0.000250307	41.218	33.901	41.218	-3.7491	435780000	0.827564	NaN	NaN	41.218	NaN	NaN
P35637	459	P35637	P35637	RNA-binding protein FUS	FUS	CNQCKAPKPDGPGGGPGGSHMGGNYGDDRRG	1682	P	4	2246		0.995606	0.00264747	84.842	78.811	43.888	-0.39647	954590000	0.995606	NaN	0.994955	45.885	NaN	84.842
P35658	568	P35658	P35658	Nuclear pore complex protein Nup214	NUP214	FKPTLESTPVPSVSAPNIAMKPSFPPSTSAV	1684	P	4	2247		0.995727	4.61396e-05	44.519	41.383	44.519	3.2545	20745000	0.995727	NaN	NaN	44.519	NaN	NaN
P35658	10	P35658	P35658	Nuclear pore complex protein Nup214	NUP214	______MGDEMDAMIPEREMKDFQFRALKKV	1685	P	3	2247		1	0.000528323	61.648	58.458	50.957	1.0988	63794000	1	NaN	1	50.957	NaN	61.648
P35998	159	P35998	P35998	26S protease regulatory subunit 7	PSMC2	RNKYQIHIPLPPKIDPTVTMMQVEEKPDVTY	1689	P	4	2259		0.999913	2.40702e-05	75.758	70.271	75.758	-0.5138	95086000	0.999913	NaN	NaN	75.758	NaN	NaN
P36776	308	P36776	P36776	Lon protease homolog, mitochondrial	LONP1	TAEIVKTIRDIIALNPLYRESVLQMMQAGQR	1700	P	3	2272		1	0.00118162	66.644	51.515	66.644	-1.3659	24835000	NaN	NaN	1	NaN	NaN	66.644
P36969	182	P36969	P36969	Phospholipid hydroperoxide glutathione peroxidase, mitochondrial	GPX4	KFLIDKNGCVVKRYGPMEEPLVIEKDLPHYF	1702	P	4	2284		0.997127	0.0196355	52.784	41.484	52.784	0.46173	112480000	NaN	NaN	0.997127	NaN	NaN	52.784
P37802;Q9UI15	195;195	P37802;Q9UI15	P37802	Transgelin-2;Transgelin-3	TAGLN2;TAGLN3	SNKGASQAGMTGYGMPRQIM___________;TNRGASQAGMTGYGMPRQIL___________	1708	P	2	2293;9070		1	0.00128536	107.79	105.25	107.79	-0.52778	53658000	1	NaN	1	77.744	NaN	107.79
P38606	239	P38606	P38606	V-type proton ATPase catalytic subunit A	ATP6V1A	NHPLLTGQRVLDALFPCVQGGTTAIPGAFGC	1713	P	3	2302		0.997471	0.0235128	44.258	39.773	44.258	-0.13345	47193000	0.997471	NaN	NaN	44.258	NaN	NaN
P38646	104	P38646	P38646	Stress-70 protein, mitochondrial	HSPA9	SVVAFTADGERLVGMPAKRQAVTNPNNTFYA	1715	P	3	2303		0.999977	0.027728	50.425	41.378	50.425	0.12684	877450000	NaN	NaN	0.999977	NaN	NaN	50.425
P38919	404	P38919	P38919	Eukaryotic initiation factor 4A-III;Eukaryotic initiation factor 4A-III, N-terminally processed	EIF4A3	LRDIEQYYSTQIDEMPMNVADLI________	1717	P	2	2304		1	0.000721592	81.656	71.599	81.656	-1.391	1478000000	1	NaN	1	81.656	NaN	69.152
P38919	164	P38919	P38919	Eukaryotic initiation factor 4A-III;Eukaryotic initiation factor 4A-III, N-terminally processed	EIF4A3	DIRKLDYGQHVVAGTPGRVFDMIRRRSLRTR	1718	P	4	2304		1	0.0060066	54.668	40.796	54.668	-0.15315	15312000	1	NaN	NaN	54.668	NaN	NaN
P38919	222	P38919	P38919	Eukaryotic initiation factor 4A-III;Eukaryotic initiation factor 4A-III, N-terminally processed	EIF4A3	YLPPATQVVLISATLPHEILEMTNKFMTDPI	1719	P	3	2304		0.82423	1.34554e-06	64.176	64.176	64.176	0.34901	58339000	NaN	NaN	0.82423	NaN	NaN	64.176
P39019	2	P39019	P39019	40S ribosomal protein S19	RPS19	______________MPGVTVKDVNQQEFVRA	1720	P	2	2307		1	0.000863117	73.666	43.116	73.666	-1.8461	0	NaN	NaN	1	NaN	NaN	73.666
P39023	82	P39023	P39023	60S ribosomal protein L3	RPL3	VNKKEVVEAVTIVETPPMVVVGIVGYVETPR	1721	P	4	2308		0.585837	4.80558e-15	147.54	145.96	147.54	-0.21711	311860000	0.582232	NaN	0.585837	138.88	NaN	147.54
P40189	426	P40189	P40189	Interleukin-6 receptor subunit beta	IL6ST	AAVLTIPACDFQATHPVMDLKAFPKDNMLWV	1725	P	3	2317		0.863246	0.0324585	43.176	35.463	43.176	0.086516	17330000	NaN	NaN	0.863246	NaN	NaN	43.176
P40222	525	P40222	P40222	Alpha-taxilin	TXLNA	AQAPSSPRVTEAPCYPGAPSTEASGQTGPQE	1731	P	4	2318		0.787817	0.000172407	47.507	44.678	40.056	-0.54	35932000	0.333221	0	0.787817	47.507	NaN	40.056
P40222	20	P40222	P40222	Alpha-taxilin	TXLNA	DKKNGAAKQSNPKSSPGQPEAGPEGAQERPS	1732	P	4	2318		0.99976	0.000209968	46.608	44.773	46.608	-0.58157	26613000	0.99976	NaN	NaN	46.608	NaN	NaN
P40222	23	P40222	P40222	Alpha-taxilin	TXLNA	NGAAKQSNPKSSPGQPEAGPEGAQERPSQAA	1733	P	4	2318		0.99976	0.000209968	46.608	44.773	46.608	-0.58157	26613000	0.99976	NaN	NaN	46.608	NaN	NaN
P40222	27	P40222	P40222	Alpha-taxilin	TXLNA	KQSNPKSSPGQPEAGPEGAQERPSQAAPAVE	1734	P	4	2318		0.99976	0.000209968	46.608	44.773	46.608	-0.58157	26613000	0.99976	NaN	NaN	46.608	NaN	NaN
P40222	34	P40222	P40222	Alpha-taxilin	TXLNA	SPGQPEAGPEGAQERPSQAAPAVEAEGPGSS	1735	P	4	2318		0.99976	0.000209968	46.608	44.773	46.608	-0.58157	26613000	0.99976	NaN	NaN	46.608	NaN	NaN
P40222	39	P40222	P40222	Alpha-taxilin	TXLNA	EAGPEGAQERPSQAAPAVEAEGPGSSQAPRK	1736	P	4	2318		0.99976	0.000209968	46.608	44.773	46.608	-0.58157	26613000	0.99976	NaN	NaN	46.608	NaN	NaN
P40227	72	P40227	P40227	T-complex protein 1 subunit zeta	CCT6A	TKDGNVLLHEMQIQHPTASLIAKVATAQDDI	1737	P	4	2319		1	0.0182489	43.799	40.56	43.799	-0.39883	23969000	NaN	NaN	1	NaN	NaN	43.799
P40227	409	P40227	P40227	T-complex protein 1 subunit zeta	CCT6A	GLRAVKNAIDDGCVVPGAGAVEVAMAEALIK	1738	P	3	2319		1	0.00275468	56.947	49.501	56.947	-1.7895	24310000	NaN	NaN	1	NaN	NaN	56.947
P40425	381	P40425	P40425	Pre-B-cell leukemia transcription factor 2	PBX2	SYSASQVESLRHSMGPGGYGDNLGGGQMYSP	1739	P	3	2322		0.991011	0.00477269	52.909	52.909	52.909	-1.1634	19715000	NaN	NaN	0.991011	NaN	NaN	52.909
P40763	725	P40763	P40763	Signal transducer and activator of transcription 3	STAT3	FICVTPTTCSNTIDLPMSPRTLDSLMQFGNN	1740	P	3	2327		0.52828	0.00214609	65.808	62.967	53.278	0.56863	26969000	NaN	NaN	0.52828	NaN	NaN	65.808
P40939	467	P40939	P40939	Trifunctional enzyme subunit alpha, mitochondrial;Long-chain enoyl-CoA hydratase;Long chain 3-hydroxyacyl-CoA dehydrogenase	HADHA	LSLKHRVLKEVEAVIPDHCIFASNTSALPIS	1746	P	3	2334		0.999485	4.08673e-05	81.97	76.758	81.97	0.23958	223910000	0.999485	NaN	NaN	81.97	NaN	NaN
P41227	23	P41227	P41227	N-alpha-acetyltransferase 10	NAA10	PEDLMNMQHCNLLCLPENYQMKYYFYHGLSW	1750	P	4	2347		1	0.00354042	48.867	48.867	48.867	-0.035439	13302000	1	NaN	NaN	48.867	NaN	NaN
P41229	573	P41229	P41229	Lysine-specific demethylase 5C	KDM5C	DSQPDLLHQLVTLMNPNTLMSHGVPVVRTNQ	1751	P	4	2348		0.997568	5.99385e-08	65.736	65.736	65.736	-0.60291	96250000	0.997568	NaN	NaN	65.736	NaN	NaN
P41229	864	P41229	P41229	Lysine-specific demethylase 5C	KDM5C	TLTELRAFLDQMNNLPCAMHQIGDVKGVLEQ	1752	P	4	2348		1	2.66616e-05	59.228	50.464	59.228	0.80618	57821000	1	NaN	NaN	59.228	NaN	NaN
P41229	757	P41229	P41229	Lysine-specific demethylase 5C	KDM5C	SSRQYLRYRYTLDELPAMLHKLKVRAESFDT	1753	P	4	2348		1	0.00764604	65.092	65.092	65.092	-0.24964	74946000	NaN	NaN	1	NaN	NaN	65.092
P41240	349	P41240	P41240	Tyrosine-protein kinase CSK	CSK	GLTKEASSTQDTGKLPVKWTAPEALREKKFS	1754	P	4	2350		1	0.0351706	53.553	39.391	53.553	1.3419	36666000	1	NaN	NaN	53.553	NaN	NaN
P41240	355	P41240	P41240	Tyrosine-protein kinase CSK	CSK	SSTQDTGKLPVKWTAPEALREKKFSTKSDVW	1755	P	4	2350		1	0.0351706	53.553	39.391	53.553	1.3419	36666000	1	NaN	NaN	53.553	NaN	NaN
P41252	348	P41252	P41252	Isoleucine--tRNA ligase, cytoplasmic	IARS	YRVCMDFNIIRKDSLPVCPVDASGCFTTEVT	1757	P	3	2353		0.525677	0.00709578	47.52	45.047	46.404	-1.0958	15426000	0.525677	NaN	0.516317	46.404	NaN	47.52
P41252	351	P41252	P41252	Isoleucine--tRNA ligase, cytoplasmic	IARS	CMDFNIIRKDSLPVCPVDASGCFTTEVTDFA	1758	P	3	2353		0.974408	0.00607825	48.286	45.813	43.696	-2.3699	14800000	0.974408	NaN	0.967505	43.696	NaN	48.286
P41252	771	P41252	P41252	Isoleucine--tRNA ligase, cytoplasmic	IARS	ETLFSVLLSLCRLMAPYTPFLTELMYQNLKV	1761	P	3	2353		0.99728	5.38876e-05	99.238	99.238	99.238	-0.04908	27735000	NaN	NaN	0.99728	NaN	NaN	99.238
P41743	2	P41743	P41743	Protein kinase C iota type	PRKCI	______________MPTQRDSSTMSHTVAGG	1763	P	4	2357		1	0.0118748	41.763	38.664	41.763	-1.4302	6894000	1	NaN	NaN	41.763	NaN	NaN
P42126	186	P42126	P42126	Enoyl-CoA delta isomerase 1, mitochondrial	ECI1	RYCIGLNETQLGIIAPFWLKDTLENTIGHRA	1765	P	4	2359		1	2.08337e-06	86.32	81.788	86.32	-3.64	31218000	1	NaN	NaN	86.32	NaN	NaN
P42285	717	P42285	P42285	Superkiller viralicidic activity 2-like 2	SKIV2L2	CSKESLKNSATEAAKPAKPDEKGEMQVVPVL	1769	P	5	2363		0.515697	0.00119173	53.55	47.117	53.55	-0.74146	184900000	0	NaN	0.515697	NaN	NaN	53.55
P42345	786	P42345	P42345	Serine/threonine-protein kinase mTOR	MTOR	YMEPILKALILKLKDPDPDPNPGVINNVLAT	1771	P	3	2366		0.999682	0.00478836	40.986	25.824	40.986	3.7713	37551000	0.999682	NaN	NaN	40.986	NaN	NaN
P42345	788	P42345	P42345	Serine/threonine-protein kinase mTOR	MTOR	EPILKALILKLKDPDPDPNPGVINNVLATIG	1772	P	3	2366		0.98437	0.00478836	40.986	25.824	40.986	3.7713	37551000	0.98437	NaN	NaN	40.986	NaN	NaN
P42345	790	P42345	P42345	Serine/threonine-protein kinase mTOR	MTOR	ILKALILKLKDPDPDPNPGVINNVLATIGEL	1773	P	3	2366		0.507974	0.00478836	40.986	25.824	40.986	3.7713	37551000	0.507974	NaN	NaN	40.986	NaN	NaN
P42345	792	P42345	P42345	Serine/threonine-protein kinase mTOR	MTOR	KALILKLKDPDPDPNPGVINNVLATIGELAQ	1774	P	3	2366		0.507974	0.00478836	40.986	25.824	40.986	3.7713	37551000	0.507974	NaN	NaN	40.986	NaN	NaN
P42694	618	P42694	P42694	Probable helicase with zinc finger domain	HELZ	MHYALDRIKDNGVLFPDISMTPTIPWSPNRQ	1779	P	3	2376		0.993134	0.0183854	51.645	44.692	51.645	2.5269	19381000	0.993134	NaN	NaN	51.645	NaN	NaN
P42695	717	P42695	P42695	Condensin-2 complex subunit D3	NCAPD3	FINNVISHTGTEHSAPAWMLLSKIAGSSPRL	1780	P	4	2377		1	5.21481e-05	82.639	69.233	82.639	-0.67425	628370000	0.999736	NaN	1	46.307	NaN	82.639
P42704	1312	P42704	P42704	Leucine-rich PPR motif-containing protein, mitochondrial	LRPPRC	KQGKASTVKSVLELIPELNEKEEAYNSLMKS	1785	P	3	2380		1	0.0223985	51.348	43.636	51.348	2.178	22481000	NaN	NaN	1	NaN	NaN	51.348
P42765	48	P42765	P42765	3-ketoacyl-CoA thiolase, mitochondrial	ACAA2	SEFAAKAALSAGKVSPETVDSVIMGNVLQSS	1786	P	3	2381		1	5.37945e-06	73.17	67.626	73.17	-0.7218	56851000	NaN	NaN	1	NaN	NaN	73.17
P42892	449	P42892	P42892	Endothelin-converting enzyme 1	ECE1	FCVSDTENNLGFALGPMFVKATFAEDSKSIA	1795	P	2	2387		1	2.23639e-13	171.26	150.01	171.26	-2.9477	68078000	1	NaN	NaN	171.26	NaN	NaN
P43121	258	P43121	P43121	Cell surface glycoprotein MUC18	MCAM	VPVFYPTEKVWLEVEPVGMLKEGDRVEIRCL	1796	P	3	2393		0.999999	2.17424e-05	110.18	101.09	110.18	-0.26734	120150000	NaN	NaN	0.999999	NaN	NaN	110.18
P43121	618	P43121	P43121	Cell surface glycoprotein MUC18	MCAM	SRKSELVVEVKSDKLPEEMGLLQGSSGDKRA	1797	P	4	2393		1	0.0325103	42.711	28.251	42.711	0.065239	25857000	1	NaN	NaN	42.711	NaN	NaN
P43246	179	P43246	P43246	DNA mismatch repair protein Msh2	MSH2	GYVDSIQRKLGLCEFPDNDQFSNLEALLIQI	1799	P	3	2396		1	0.0110958	67.992	61.488	67.992	0.035039	15636000	1	NaN	NaN	67.992	NaN	NaN
P43405	342	P43405	P43405	Tyrosine-protein kinase SYK	SYK	LAPWAADKGPQREALPMDTEVYESPYADPEE	1800	P	3	2402		0.999983	1.01972e-05	96.303	89.87	96.303	0.041064	108250000	NaN	NaN	0.999983	NaN	NaN	96.303
P43487	133	P43487	P43487	Ran-specific GTPase-activating protein	RANBP1	RAWVWNTHADFADECPKPELLAIRFLNAENA	1801	P	4	2403		0.940892	0.0038575	51.526	48.529	51.526	-0.76329	463840000	0.940892	NaN	NaN	51.526	NaN	NaN
P43487	65	P43487	P43487	Ran-specific GTPase-activating protein	RANBP1	KMRAKLFRFASENDLPEWKERGTGDVKLLKH	1802	P	2	2403		1	0.0241839	85.813	71.907	85.813	3.2855	0	1	NaN	1	79.201	NaN	85.813
P43626	21	P43626	P43626	Killer cell immunoglobulin-like receptor 2DL1	KIR2DL1	VSMACVGFFLLQGAWPHEGVHRKPSLLAHPG	1804	P	4	2405		1	0.00105196	45.972	34.139	45.972	0.90339	137260000	1	NaN	NaN	45.972	NaN	NaN
P43897	224	P43897	P43897	Elongation factor Ts, mitochondrial	TSFM	SGFYVGSYVHGAMQSPSLHKLVLGKYGALVI	1805	P	3	2408		0.999999	0.00260334	60.398	52.595	60.398	0.43472	115620000	0.999957	NaN	0.999999	50.426	NaN	60.398
P45974	492	P45974	P45974	Ubiquitin carboxyl-terminal hydrolase 5	USP5	VKYTQRVDYIMQLPVPMDAALNKEELLEYEE	1810	P	3	2413		0.892005	9.08086e-06	111.79	111.79	110.49	0.32232	359380000	0.892005	NaN	0.789735	110.49	NaN	111.79
P45985	32	P45985	P45985	Dual specificity mitogen-activated protein kinase kinase 4	MAP2K4	GSGTPGPVGSPAPGHPAVSSMQGKRKALKLN	1811	P	3	2416		0.822933	3.55416e-05	45.187	39.921	45.187	1.0532	172730000	0.822933	NaN	NaN	45.187	NaN	NaN
P46013	1006	P46013	P46013	Antigen KI-67	MKI67	HAKAPKSEKGKITKMPCQSLQPEPINTPTHT	1816	P	3	2417		0.999957	0.00152999	70.335	69.006	70.335	0.85391	68611000	0.999957	NaN	NaN	70.335	NaN	NaN
P46013	1112	P46013	P46013	Antigen KI-67	MKI67	QSLEDLAGFKELFQTPGPSEESMTDEKTTKI	1817	P	3	2417		0.532827	1.86172e-05	63.516	58.899	63.516	-0.61777	80576000	0.532827	NaN	0	63.516	NaN	NaN
P46013	1114	P46013	P46013	Antigen KI-67	MKI67	LEDLAGFKELFQTPGPSEESMTDEKTTKIAC	1818	P	4	2417		0.960924	2.06988e-05	77.31	68.423	77.31	0.85242	49163000	NaN	NaN	0.960924	NaN	NaN	77.31
P46020	565	P46020	P46020	Phosphorylase b kinase regulatory subunit alpha, skeletal muscle isoform	PHKA1	LCSRWRMTGQPTITFPISHSMLDEDGTSLNS	1819	P	3	2419		0.981905	0.000306504	50.58	48.215	50.58	-2.1742	21348000	0.981905	NaN	NaN	50.58	NaN	NaN
P46060	422	P46060	P46060	Ran GTPase-activating protein 1	RANGAP1	SATPSRKILDPNTGEPAPVLSSPPPADVSTF	1821	P	3	2420		0.937674	0.00267872	42.571	34.175	42.571	-1.5208	73592000	NaN	NaN	0.937674	NaN	NaN	42.571
P46060	424	P46060	P46060	Ran GTPase-activating protein 1	RANGAP1	TPSRKILDPNTGEPAPVLSSPPPADVSTFLA	1822	P	3	2420		0.938774	0.00267872	42.571	34.175	42.571	-1.5208	73592000	NaN	NaN	0.938774	NaN	NaN	42.571
P46060	429	P46060	P46060	Ran GTPase-activating protein 1	RANGAP1	ILDPNTGEPAPVLSSPPPADVSTFLAFPSPE	1823	P	3	2420		0.940134	0.00267872	42.571	34.175	42.571	-1.5208	73592000	NaN	NaN	0.940134	NaN	NaN	42.571
P46060	430	P46060	P46060	Ran GTPase-activating protein 1	RANGAP1	LDPNTGEPAPVLSSPPPADVSTFLAFPSPEK	1824	P	3	2420		0.940134	0.00267872	42.571	34.175	42.571	-1.5208	73592000	NaN	NaN	0.940134	NaN	NaN	42.571
P46060	431	P46060	P46060	Ran GTPase-activating protein 1	RANGAP1	DPNTGEPAPVLSSPPPADVSTFLAFPSPEKL	1825	P	3	2420		0.917439	0.00267872	42.571	34.175	42.571	-1.5208	73592000	NaN	NaN	0.917439	NaN	NaN	42.571
P46109	45	P46109	P46109	Crk-like protein	CRKL	GQRHGMFLVRDSSTCPGDYVLSVSENSRVSH	1829	P	3	2425		1	0.0293227	49.537	45.435	49.537	-0.10113	29800000	1	NaN	NaN	49.537	NaN	NaN
P46109	109	P46109	P46109	Crk-like protein	CRKL	DTTTLIEPAPRYPSPPMGSVSAPNLPTAEDN	1832	P	2	2425		0.931237	6.68986e-46	196.64	173.63	159.34	0.16131	193620000	0.931237	NaN	0.842055	159.34	NaN	196.64
P46734	9	P46734	P46734	Dual specificity mitogen-activated protein kinase kinase 3	MAP2K3	_______MESPASSQPASMPQSKGKSKRKKD	1839	P	2	2432		0.914876	0.0052167	57.019	57.019	57.019	-1.6278	2219100	0.914876	NaN	NaN	57.019	NaN	NaN
P46782	15	P46782	P46782	40S ribosomal protein S5;40S ribosomal protein S5, N-terminally processed	RPS5	_MTEWETAAPAVAETPDIKLFGKWSTDDVQI	1844	P	2	2439		1	0.0038316	44.511	41.65	44.511	0.08669	56794000	1	NaN	NaN	44.511	NaN	NaN
P46783;Q9NQ39	30;30	P46783	P46783	40S ribosomal protein S10;Putative 40S ribosomal protein S10-like	RPS10;RPS10P5	LFKEGVMVAKKDVHMPKHPELADKNVPNLHV	1845	P	5	2440		0.875896	0.0024564	63.454	63.454	63.454	0.64367	145730000	NaN	NaN	0.875896	NaN	NaN	63.454
P46783;Q9NQ39	33;33	P46783	P46783	40S ribosomal protein S10;Putative 40S ribosomal protein S10-like	RPS10;RPS10P5	EGVMVAKKDVHMPKHPELADKNVPNLHVMKA	1846	P	6	2440		0.531467	0.0188383	42.309	42.309	42.309	-0.25356	199250000	NaN	NaN	0.531467	NaN	NaN	42.309
P46821	1379	P46821	P46821	Microtubule-associated protein 1B;MAP1B heavy chain;MAP1 light chain LC1	MAP1B	EFSDAKDENERASVSPMDEPVPDSESPIEKV	1848	P	2	2441		0.999981	0.000128944	124.42	110.75	124.42	-0.55078	35015000	0.999981	NaN	NaN	124.42	NaN	NaN
P46821	1209	P46821	P46821	Microtubule-associated protein 1B;MAP1B heavy chain;MAP1 light chain LC1	MAP1B	ATDGKDYNASASTISPPSSMEEDKFSRSALR	1849	P	2	2441		0.609825	7.98804e-05	79.466	78.728	79.466	-0.52316	43372000	0	NaN	0.609825	NaN	NaN	79.466
P46821	1210	P46821	P46821	Microtubule-associated protein 1B;MAP1B heavy chain;MAP1 light chain LC1	MAP1B	TDGKDYNASASTISPPSSMEEDKFSRSALRD	1850	P	2	2441		0.890506	0.000616043	94.275	90.23	77.912	0.44106	148330000	0.890506	NaN	0	94.275	NaN	NaN
P46940	414	P46940	P46940	Ras GTPase-activating-like protein IQGAP1	IQGAP1	IQKGVAEKTVLELMNPEAQLPQVYPFAADLY	1856	P	3	2446		0.96387	3.31272e-07	74.846	67.166	74.846	1.4331	31834000	NaN	NaN	0.96387	NaN	NaN	74.846
P46940	15	P46940	P46940	Ras GTPase-activating-like protein IQGAP1	IQGAP1	_MSAADEVDGLGVARPHYGSVLDNERLTAEE	1859	P	4	2446		1	0.00079378	42.181	36.596	42.181	-0.80494	42664000	NaN	NaN	1	NaN	NaN	42.181
P46940	658	P46940	P46940	Ras GTPase-activating-like protein IQGAP1	IQGAP1	LSALRSPDVGLYGVIPECGETYHSDLAEAKK	1860	P	3	2446		0.99983	0.0272888	40.285	37.557	40.285	-0.58078	17544000	0.99983	NaN	NaN	40.285	NaN	NaN
P46977	632	P46977	P46977	Dolichyl-diphosphooligosaccharide--protein glycosyltransferase subunit STT3A	STT3A	YYTPTGEFRVDREGSPVLLNCLMYKMCYYRF	1862	P	4	2449		0.945053	0.00187828	55.063	49.633	55.063	0.94949	35931000	NaN	NaN	0.945053	NaN	NaN	55.063
P47224	3	P47224	P47224	Guanine nucleotide exchange factor MSS4	RABIF	_____________MEPAEQPSELVSAEGRNR	1863	P	3	2450		0.964758	0.0010083	59.513	53.798	59.513	1.0138	55993000	NaN	NaN	0.964758	NaN	NaN	59.513
P47756	74	P47756	P47756	F-actin-capping protein subunit beta	CAPZB	YLLCDYNRDGDSYRSPWSNKYDPPLEDGAMP	1865	P	3	2453		0.762556	0.0342409	41.115	32.827	41.115	0.59711	30401000	NaN	NaN	0.762556	NaN	NaN	41.115
P47756	81	P47756	P47756	F-actin-capping protein subunit beta	CAPZB	RDGDSYRSPWSNKYDPPLEDGAMPSARLRKL	1866	P	3	2453		0.981193	0.0342409	43.497	34.678	43.497	0.6779	105750000	0.981193	NaN	0.931217	43.497	NaN	41.115
P47897	379	P47897	P47897	Glutamine--tRNA ligase	QARS	ELKGHNTLPSPWRDRPMEESLLLFEAMRKGK	1868	P	4	2456		1	0.00148575	81.317	73.42	81.317	-0.25616	50007000	NaN	NaN	1	NaN	NaN	81.317
P47928	6	P47928	P47928	DNA-binding protein inhibitor ID-4	ID4	__________MKAVSPVRPSGRKAPSGCGGG	1870	P	2	2458		1	0.0297743	83.614	29.558	83.614	-1.7326	60120000	NaN	NaN	1	NaN	NaN	83.614
P48200	94	P48200	P48200	Iron-responsive element-binding protein 2	IREB2	PFFPARVLLQDFTGIPAMVDFAAMREAVKTL	1873	P	3	2466		1	3.47515e-05	124.51	113.57	44.953	0.14605	153280000	1	NaN	1	107.99	NaN	124.51
P48552	349	P48552	P48552	Nuclear receptor-interacting protein 1	NRIP1	SKLMASKSSATVFQNPMGIIPSSPKNAGYKN	1880	P	2	2478		0.998303	0.0294733	88.092	74.892	88.092	1.9458	0	NaN	NaN	0.998303	NaN	NaN	88.092
P48634	1363	P48634	P48634	Protein PRRC2A	PRRC2A	PKAVGTPGGGGGGAVPGISAMSRGDLSQRAK	1882	P	2	2481		1	3.64673e-14	136.6	108.32	136.6	-1.3218	63396000	1	NaN	1	128.76	NaN	136.6
P48634	863	P48634	P48634	Protein PRRC2A	PRRC2A	GPPISRFPLEEPGPRPLPWPPGSDEVAKIQT	1887	P	3	2481		0.586485	4.68825e-05	84.946	73.142	84.946	-0.61007	27808000	0.586485	NaN	NaN	84.946	NaN	NaN
P48634	774	P48634	P48634	Protein PRRC2A	PRRC2A	SDSGGSSSEPFDRHAPAMLRERGTPPVDPKL	1889	P	3	2481		0.959944	0.0289015	51.348	42.301	51.348	1.0996	58962000	0.959944	NaN	NaN	51.348	NaN	NaN
P48643	237	P48643	P48643	T-complex protein 1 subunit epsilon	CCT5	TKLIKGVIVDKDFSHPQMPKKVEDAKIAILT	1894	P	4	2483		0.922853	0.00204155	73.156	61.717	73.156	-0.11565	175340000	0.922853	NaN	0.885459	73.156	NaN	61.409
P48730	359	P48730	P48730	Casein kinase I isoform delta	CSNK1D	TPLTPTSHTANTSPRPVSGMERERKVSMRLH	1899	P	4	2489		0.664737	2.69637e-05	67.367	58.475	67.367	-0.29155	82764000	0.664737	0	0.490993	67.367	NaN	48.697
P48739	12	P48739	P48739	Phosphatidylinositol transfer protein beta isoform	PITPNB	____MVLIKEFRVVLPCSVQEYQVGQLYSVA	1900	P	3	2491		1	0.00860358	54.141	51.828	50.055	0.056042	19924000	1	NaN	NaN	54.141	NaN	NaN
P48739	185	P48739	P48739	Phosphatidylinositol transfer protein beta isoform	PITPNB	RGPLGPNWKKELANSPDCPQMCAYKLVTIKF	1901	P	2	2491		0.922622	0.000712241	104.52	95.334	73.067	-1.1074	175150000	0.922622	NaN	NaN	104.52	NaN	NaN
P49005	429	P49005	P49005	DNA polymerase delta subunit 2	POLD2	IIRGPEDQTVLLVTVPDFSATQTACLVNLRS	1903	P	3	2493		0.999935	0.00466628	53.262	37.324	53.262	0.36393	3824900	0.999935	NaN	NaN	53.262	NaN	NaN
P49006	171	P49006	P49006	MARCKS-related protein	MARCKSL1	AKGAEASAASEEEAGPQATEPSTPSGPESGP	1904	P	3	2494		0.94832	2.00495e-09	63.426	63.419	63.426	0.38409	55113000	NaN	NaN	0.94832	NaN	NaN	63.426
P49006	176	P49006	P49006	MARCKS-related protein	MARCKSL1	ASAASEEEAGPQATEPSTPSGPESGPTPASA	1905	P	3	2494		0.94832	2.00495e-09	63.426	63.419	63.426	0.38409	55113000	NaN	NaN	0.94832	NaN	NaN	63.426
P49006	179	P49006	P49006	MARCKS-related protein	MARCKSL1	ASEEEAGPQATEPSTPSGPESGPTPASAEQN	1906	P	3	2494		0.94832	2.00495e-09	63.426	63.419	63.426	0.38409	55113000	NaN	NaN	0.94832	NaN	NaN	63.426
P49006	182	P49006	P49006	MARCKS-related protein	MARCKSL1	EEAGPQATEPSTPSGPESGPTPASAEQNE__	1907	P	3	2494		0.94832	2.00495e-09	63.426	63.419	63.426	0.38409	55113000	NaN	NaN	0.94832	NaN	NaN	63.426
P49006	186	P49006	P49006	MARCKS-related protein	MARCKSL1	PQATEPSTPSGPESGPTPASAEQNE______	1908	P	3	2494		0.94832	2.00495e-09	63.426	63.419	63.426	0.38409	55113000	NaN	NaN	0.94832	NaN	NaN	63.426
P49023	330	P49023	P49023	Paxillin	PXN	QGKTGSSSPPGGPPKPGSQLDSMLGSLQSDL	1916	P	3	2495		0.734876	0.00223551	103.12	96.888	103.12	1.1002	42964000	0.734876	NaN	NaN	103.12	NaN	NaN
P49069	53	P49069	P49069	Calcium signal-modulating cyclophilin ligand	CAMLG	MNSEQRINRIMGFHRPGSGAEEESQTKSKQQ	1917	P	4	2496		1	0.0097751	54.288	49.386	46.663	-0.63722	22878000	1	NaN	1	54.288	NaN	46.663
P49257	423	P49257	P49257	Protein ERGIC-53	LMAN1	NSMSETVRLVSGMQHPGSAGGVYETTQHFID	1921	P	6	2502		1	1.01685e-05	81.242	79.392	81.242	-1.2156	501220000	1	NaN	NaN	81.242	NaN	NaN
P49257	75	P49257	P49257	Protein ERGIC-53	LMAN1	SDGTVPFWAHAGNAIPSSDQIRVAPSLKSQR	1923	P	5	2502		0.999278	0.000962736	48.693	37.79	48.693	0.85817	52518000	0.999278	NaN	NaN	48.693	NaN	NaN
P49327	616	P49327	P49327	Fatty acid synthase;[Acyl-carrier-protein] S-acetyltransferase;[Acyl-carrier-protein] S-malonyltransferase;3-oxoacyl-[acyl-carrier-protein] synthase;3-oxoacyl-[acyl-carrier-protein] reductase;3-hydroxyacyl-[acyl-carrier-protein] dehydratase;Enoyl-[acyl-carrier-protein] reductase;Oleoyl-[acyl-carrier-protein] hydrolase	FASN	LAAYWRGQCIKEAHLPPGAMAAVGLSWEECK	1928	P	4	2505		0.52209	0.0193263	45.395	37.774	45.395	3.8468	23031000	0.52209	NaN	NaN	45.395	NaN	NaN
P49327	617	P49327	P49327	Fatty acid synthase;[Acyl-carrier-protein] S-acetyltransferase;[Acyl-carrier-protein] S-malonyltransferase;3-oxoacyl-[acyl-carrier-protein] synthase;3-oxoacyl-[acyl-carrier-protein] reductase;3-hydroxyacyl-[acyl-carrier-protein] dehydratase;Enoyl-[acyl-carrier-protein] reductase;Oleoyl-[acyl-carrier-protein] hydrolase	FASN	AAYWRGQCIKEAHLPPGAMAAVGLSWEECKQ	1929	P	3	2505		0.966725	1.04626e-09	130.05	123.02	130.05	0.21483	46951000	0.966725	NaN	NaN	130.05	NaN	NaN
P49327	1440	P49327	P49327	Fatty acid synthase;[Acyl-carrier-protein] S-acetyltransferase;[Acyl-carrier-protein] S-malonyltransferase;3-oxoacyl-[acyl-carrier-protein] synthase;3-oxoacyl-[acyl-carrier-protein] reductase;3-hydroxyacyl-[acyl-carrier-protein] dehydratase;Enoyl-[acyl-carrier-protein] reductase;Oleoyl-[acyl-carrier-protein] hydrolase	FASN	VESLKGILADEDSSRPVWLKAINCATSGVVG	1934	P	3	2505		1	0.00116765	107.14	76.178	62.357	1.2564	193570000	1	NaN	1	94.728	NaN	107.14
P49327	1556	P49327	P49327	Fatty acid synthase;[Acyl-carrier-protein] S-acetyltransferase;[Acyl-carrier-protein] S-malonyltransferase;3-oxoacyl-[acyl-carrier-protein] synthase;3-oxoacyl-[acyl-carrier-protein] reductase;3-hydroxyacyl-[acyl-carrier-protein] dehydratase;Enoyl-[acyl-carrier-protein] reductase;Oleoyl-[acyl-carrier-protein] hydrolase	FASN	LSSIRWVCSSLRHAQPTCPGAQLCTVYYASL	1935	P	4	2505		0.540329	0.000350781	53.968	51.878	53.968	-0.31053	9717800	0.540329	NaN	NaN	53.968	NaN	NaN
P49327	1585	P49327	P49327	Fatty acid synthase;[Acyl-carrier-protein] S-acetyltransferase;[Acyl-carrier-protein] S-malonyltransferase;3-oxoacyl-[acyl-carrier-protein] synthase;3-oxoacyl-[acyl-carrier-protein] reductase;3-hydroxyacyl-[acyl-carrier-protein] dehydratase;Enoyl-[acyl-carrier-protein] reductase;Oleoyl-[acyl-carrier-protein] hydrolase	FASN	SLNFRDIMLATGKLSPDAIPGKWTSQDSLLG	1938	P	3	2505		1	0.0163051	46.065	38.443	41.084	0.83352	643250000	1	NaN	NaN	46.065	NaN	NaN
P49327	1589	P49327	P49327	Fatty acid synthase;[Acyl-carrier-protein] S-acetyltransferase;[Acyl-carrier-protein] S-malonyltransferase;3-oxoacyl-[acyl-carrier-protein] synthase;3-oxoacyl-[acyl-carrier-protein] reductase;3-hydroxyacyl-[acyl-carrier-protein] dehydratase;Enoyl-[acyl-carrier-protein] reductase;Oleoyl-[acyl-carrier-protein] hydrolase	FASN	RDIMLATGKLSPDAIPGKWTSQDSLLGMEFS	1939	P	3	2505		1	0.0163051	46.065	38.443	41.084	0.83352	704300000	1	NaN	NaN	46.065	NaN	NaN
P49327	364	P49327	P49327	Fatty acid synthase;[Acyl-carrier-protein] S-acetyltransferase;[Acyl-carrier-protein] S-malonyltransferase;3-oxoacyl-[acyl-carrier-protein] synthase;3-oxoacyl-[acyl-carrier-protein] reductase;3-hydroxyacyl-[acyl-carrier-protein] dehydratase;Enoyl-[acyl-carrier-protein] reductase;Oleoyl-[acyl-carrier-protein] hydrolase	FASN	EHGLWAPNLHFHSPNPEIPALLDGRLQVVDQ	1946	P	5	2505		0.728481	0.0180952	48.422	34.156	48.422	0.73401	807070000	0.728481	0	NaN	48.422	NaN	NaN
P49411	146	P49411	P49411	Elongation factor Tu, mitochondrial	TUFM	PGHADYVKNMITGTAPLDGCILVVAANDGPM	1960	P	4	2513		0.979094	0.00185163	42.302	36.927	42.302	0.017806	181280000	0.979094	NaN	NaN	42.302	NaN	NaN
P49411	162	P49411	P49411	Elongation factor Tu, mitochondrial	TUFM	LDGCILVVAANDGPMPQTREHLLLARQIGVE	1962	P	4	2513		0.554324	2.42761e-05	102.05	102.05	102.05	-0.78439	870140000	0.554225	NaN	0.554324	97.437	NaN	102.05
P49419	362	P49419	P49419	Alpha-aminoadipic semialdehyde dehydrogenase	ALDH7A1	VNRLKKAYAQIRVGNPWDPNVLYGPLHTKQA	1964	P	3	2515		1	0.00941995	79.92	79.92	79.92	0.1927	227620000	1	NaN	0.75659	79.92	NaN	59.9
P49419	365	P49419	P49419	Alpha-aminoadipic semialdehyde dehydrogenase	ALDH7A1	LKKAYAQIRVGNPWDPNVLYGPLHTKQAVSM	1965	P	3	2515		1	0.0248611	79.92	79.92	79.92	0.1927	182740000	1	NaN	0	79.92	NaN	NaN
P49419	244	P49419	P49419	Alpha-aminoadipic semialdehyde dehydrogenase	ALDH7A1	AVTKIIAKVLEDNKLPGAICSLTCGGADIGT	1966	P	3	2515		1	0.00187442	58.08	55.302	47.507	-0.26378	51461000	1	NaN	NaN	58.08	NaN	NaN
P49419	411	P49419	P49419	Alpha-aminoadipic semialdehyde dehydrogenase	ALDH7A1	VYGGKVMDRPGNYVEPTIVTGLGHDASIAHT	1968	P	3	2515		0.542129	4.01644e-06	97.138	88.663	97.138	0.89784	82150000	0.542129	0	0	97.138	NaN	NaN
P49591	226	P49591	P49591	Serine--tRNA ligase, cytoplasmic	SARS	ALRTLGSRGYIPIYTPFFMRKEVMQEVAQLS	1974	P	2	2526		1	0.0184216	106.42	88.111	106.42	-0.14437	277330000	1	NaN	NaN	106.42	NaN	NaN
P49711	580	P49711	P49711	Transcriptional repressor CTCF	CTCF	TRRNTMARHADNCAGPDGVEGENGGETKKSK	1975	P	4	2532		1	0.000319731	86.637	85.339	63.69	-0.53505	48886000	1	NaN	NaN	86.637	NaN	NaN
P49711	185	P49711	P49711	Transcriptional repressor CTCF	CTCF	GANGEVETLEQGELPPQEDPSWQKDPDYQPP	1976	P	4	2532		0.592031	7.27716e-07	64.273	60.12	64.273	1.7471	53940000	0.592031	NaN	NaN	64.273	NaN	NaN
P49711	189	P49711	P49711	Transcriptional repressor CTCF	CTCF	EVETLEQGELPPQEDPSWQKDPDYQPPAKKT	1977	P	4	2532		0.77044	7.27716e-07	64.273	60.12	64.273	1.7471	53940000	0.77044	NaN	NaN	64.273	NaN	NaN
P49736	191	P49736	P49736	DNA replication licensing factor MCM2	MCM2	DLKGHSVREWVSMAGPRLEIHHRFKNFLRTH	1979	P	5	2535		1	0.000765756	44.75	36.132	40.146	1.4908	121830000	NaN	NaN	1	NaN	NaN	44.75
P49756	558	P49756	P49756	RNA-binding protein 25	RBM25	LEEIRQRLLAEGHPDPDAELQRMEQEAERRR	1985	P	4	2541		0.964711	0.0252814	47.392	35.196	47.392	-0.10062	43111000	NaN	NaN	0.964711	NaN	NaN	47.392
P49792	1870	P49792	P49792	E3 SUMO-protein ligase RanBP2	RANBP2	TEQGFKFGHVDQENSPSFMFQGSSNTEFKST	1991	P	3	2551		1	0.0124122	68.689	49.97	68.689	-0.0024113	0	NaN	NaN	1	NaN	NaN	68.689
P49792	1009	P49792	P49792	E3 SUMO-protein ligase RanBP2	RANBP2	AESKTIEFGKTNFVQPMPGEGLRPSLPTQAH	1994	P	4	2551		0.931208	6.83913e-08	70.378	63.162	44.05	-0.73946	101020000	0.789067	NaN	0.931208	70.378	NaN	44.05
P49902	503	P49902	P49902	Cytosolic purine 5'-nucleotidase	NT5C2	STVEHTHVDINEMESPLATRNRTSVDFKDTD	2003	P	6	2560		0.559599	0.0040834	45.596	45.596	45.596	0.42976	9069500	NaN	NaN	0.559599	NaN	NaN	45.596
P49916	550	P49916	P49916	DNA ligase 3	LIG3	PHKVAHFKDYIPQAFPGGHSMILDSEVLLID	2010	P	4	2564		0.999956	0.00018427	92.238	83.25	92.238	-1.0682	75675000	0.999956	NaN	NaN	92.238	NaN	NaN
P50213	108	P50213	P50213	Isocitrate dehydrogenase [NAD] subunit alpha, mitochondrial	IDH3A	MGLKGPLKTPIAAGHPSMNLLLRKTFDLYAN	2014	P	4	2573		0.999999	0.000744216	83.37	76.933	83.37	-0.13833	1259600000	0.999999	NaN	NaN	83.37	NaN	NaN
P50225	236	P50225	P50225	Sulfotransferase 1A1	SULT1A1	DFVVQHTSFKEMKKNPMTNYTTVPQEFMDHS	2015	P	3	2577		1	0.000476545	72.805	72.805	60.464	-0.22503	54130000	0.999935	0	1	72.805	NaN	60.464
P50225	254	P50225	P50225	Sulfotransferase 1A1	SULT1A1	NYTTVPQEFMDHSISPFMRKGMAGDWKTTFT	2017	P	3	2577		1	0.000476545	72.805	72.805	60.464	-0.22503	67797000	0.999106	0	1	72.805	NaN	60.464
P50225	90	P50225	P50225	Sulfotransferase 1A1	SULT1A1	IFMRVPFLEFKAPGIPSGMETLKDTPAPRLL	2018	P	3	2577		0.992186	0.000392255	98.019	91.724	98.019	-0.29594	81123000	NaN	NaN	0.992186	NaN	NaN	98.019
P50395	254	P50395	P50395	Rab GDP dissociation inhibitor beta	GDI2	ARLSAIYGGTYMLNKPIEEIIVQNGKVIGVK	2019	P	3	2579		1	0.024418	55.988	49.624	55.988	1.1332	31599000	NaN	NaN	1	NaN	NaN	55.988
P50395	201	P50395	P50395	Rab GDP dissociation inhibitor beta	GDI2	GHALALYRTDDYLDQPCYETINRIKLYSESL	2020	P	2	2579		1	0.00958295	113.63	105.12	90.653	-0.52127	136670000	1	NaN	NaN	113.63	NaN	NaN
P50402	183	P50402	P50402	Emerin	EMD	RPVSASRSSLDLSYYPTSSSTSFMSSSSSSS	2022	P	2	2580		1	0.0158627	45.438	34.823	45.438	3.6175	0	1	NaN	NaN	45.438	NaN	NaN
P50502	226	P50502	P50502	Hsc70-interacting protein	ST13	LDYDEDASAMLKEVQPRAQKIAEHRRKYERK	2027	P	5	2586		1	0.0016457	41.209	36.893	41.209	-0.44661	121940000	1	NaN	NaN	41.209	NaN	NaN
P50570	176	P50570	P50570	Dynamin-2	DNM2	LQFISRESSLILAVTPANMDLANSDALKLAK	2031	P	2	2591		1	0.000142689	112.72	84.861	111.12	2.3912	296210000	1	NaN	1	53.201	NaN	112.72
P50897	131	P50897	P50897	Palmitoyl-protein thioesterase 1	PPT1	QGGQFLRAVAQRCPSPPMINLISVGGQHQGV	2033	P	3	2603		0.608683	1.31074e-05	101.29	94.709	101.29	0.64303	55999000	0.608683	NaN	0	101.29	NaN	NaN
P50897	132	P50897	P50897	Palmitoyl-protein thioesterase 1	PPT1	GGQFLRAVAQRCPSPPMINLISVGGQHQGVF	2034	P	3	2603		0.852669	1.52717e-05	99.366	96.496	99.366	0.52986	39269000	NaN	NaN	0.852669	NaN	NaN	99.366
P50990	431	P50990	P50990	T-complex protein 1 subunit theta	CCT8	EIELAKQITSYGETCPGLEQYAIKKFAEAFE	2040	P	3	2605		1	0.0119301	56.817	53.756	56.817	1.1922	16846000	1	NaN	NaN	56.817	NaN	NaN
P51532	616	P51532	P51532	Transcription activator BRG1	SMARCA4	PDGEPLDETSQMSDLPVKVIHVESGKILTGT	2046	P	4	2625		0.983891	0.00048167	41.514	38.435	41.514	0.91065	12704000	0.983891	0	NaN	41.514	NaN	NaN
P51610	1955	P51610	P51610	Host cell factor 1;HCF N-terminal chain 1;HCF N-terminal chain 2;HCF N-terminal chain 3;HCF N-terminal chain 4;HCF N-terminal chain 5;HCF N-terminal chain 6;HCF C-terminal chain 1;HCF C-terminal chain 2;HCF C-terminal chain 3;HCF C-terminal chain 4;HCF C-terminal chain 5;HCF C-terminal chain 6	HCFC1	SSTPAQLAFMRVYCGPSPSCLVQSSSLSNAH	2056	P	3	2633		0.932342	5.92441e-05	85.467	82.925	85.467	0.64988	20475000	0.932342	NaN	NaN	85.467	NaN	NaN
P51617	560	P51617	P51617	Interleukin-1 receptor-associated kinase 1	IRAK1	NSYVSSTGRAHSGAAPWQPLAAPSGASAQAA	2057	P	3	2634		0.999961	0.00599226	95.519	87.355	95.519	0.92676	16918000	0.999961	NaN	NaN	95.519	NaN	NaN
P51617	563	P51617	P51617	Interleukin-1 receptor-associated kinase 1	IRAK1	VSSTGRAHSGAAPWQPLAAPSGASAQAAEQL	2058	P	3	2634		0.999956	0.00599226	95.519	87.355	95.519	0.92676	16918000	0.999956	NaN	NaN	95.519	NaN	NaN
P51858	192	P51858	P51858	Hepatoma-derived growth factor	HDGF	GEEKEAATLEVERPLPMEVEKNSTPSEPGSG	2069	P	2	2662		0.990476	0.0253982	107.39	93.707	107.39	0.089911	8107000	0.990476	0	0	107.39	NaN	NaN
P51948	261	P51948	P51948	CDK-activating kinase assembly factor MAT1	MNAT1	YEYQPLQIETYGPHVPELEMLGRLGYLNHVR	2074	P	3	2664		0.934817	0.000146516	87.339	76.917	85.376	0.89797	86245000	0.778121	NaN	0.934817	87.339	NaN	85.376
P52209	419	P52209	P52209	6-phosphogluconate dehydrogenase, decarboxylating	PGD	DSWRRAVSTGVQAGIPMPCFTTALSFYDGYR	2078	P	4	2672		0.978698	2.38556e-19	142.04	135.17	142.04	-1.1621	591210000	0.978698	NaN	NaN	142.04	NaN	NaN
P52272	79	P52272	P52272	Heterogeneous nuclear ribonucleoprotein M	HNRNPM	YANPTKRYRAFITNIPFDVKWQSLKDLVKEK	2084	P	2	2673		1	0.00758622	91.858	78.445	91.858	-2.1691	0	1	NaN	NaN	91.858	NaN	NaN
P52272	459	P52272	P52272	Heterogeneous nuclear ribonucleoprotein M	HNRNPM	MGSVERMGSGIERMGPLGLDHMASSIERMGQ	2089	P	3	2673		1	0.0179622	51.265	43.484	51.265	-1.4465	25092000	NaN	NaN	1	NaN	NaN	51.265
P52272	174	P52272	P52272	Heterogeneous nuclear ribonucleoprotein M	HNRNPM	KVMATTGGMGMGPGGPGMITIPPSILNNPNI	2091	P	3	2673		0.977773	2.32623e-12	110.32	110.32	66.381	1.7125	15850000	0.977773	NaN	0.499644	73.138	NaN	110.32
P52292	174	P52292	P52292	Importin subunit alpha-1	KPNA2	VDGGAIPAFISLLASPHAHISEQAVWALGNI	2092	P	3	2674		0.802139	7.68389e-05	48.348	43.535	48.348	-4.0594	25576000	0.802139	NaN	NaN	48.348	NaN	NaN
P52292	57	P52292	P52292	Importin subunit alpha-1	KPNA2	KKDDQMLKRRNVSSFPDDATSPLQENRNNQG	2093	P	3	2674		1	0.0153594	47.919	45.407	47.919	-0.76825	266400000	1	NaN	NaN	47.919	NaN	NaN
P52292	63	P52292	P52292	Importin subunit alpha-1	KPNA2	LKRRNVSSFPDDATSPLQENRNNQGTVNWSV	2094	P	3	2674		1	0.0153594	47.919	45.407	47.919	-0.76825	266400000	1	NaN	NaN	47.919	NaN	NaN
P52306	60	P52306	P52306	Rap1 GTPase-GDP dissociation stimulator 1	RAP1GDS1	IQASGILQLFASLLTPQSSCKAKVANIIAEV	2095	P	3	2677		1	0.0233944	47.814	39.626	47.814	3.0622	3338000	1	NaN	NaN	47.814	NaN	NaN
P52597	233	P52597	P52597	Heterogeneous nuclear ribonucleoprotein F;Heterogeneous nuclear ribonucleoprotein F, N-terminally processed	HNRNPF	RYIGIVKQAGLERMRPGAYSTGYGGYEEYSG	2102	P	3	2685		1	0.000738571	57.262	52.861	40.764	-1.7065	19489000	1	NaN	NaN	57.262	NaN	NaN
P52732	121	P52732	P52732	Kinesin-like protein KIF11	KIF11	QTGTGKTFTMEGERSPNEEYTWEEDPLAGII	2108	P	3	2690		1	0.000733991	85.467	83.06	85.467	0.14927	79813000	0.999624	NaN	1	47.018	NaN	85.467
P52948	1785	P52948	P52948	Nuclear pore complex protein Nup98-Nup96;Nuclear pore complex protein Nup98;Nuclear pore complex protein Nup96	NUP98	DSTPDPQRVPLRLLAPHIGRLPMPEDYAMDE	2111	P	5	2714		0.559917	0.000260125	96.44	87.375	96.44	0.10003	99802000	NaN	NaN	0.559917	NaN	NaN	96.44
P52948	1793	P52948	P52948	Nuclear pore complex protein Nup98-Nup96;Nuclear pore complex protein Nup98;Nuclear pore complex protein Nup96	NUP98	VPLRLLAPHIGRLPMPEDYAMDELRSLTQSY	2112	P	4	2714		0.516927	0.000915964	59.469	54.491	59.469	-0.36645	132660000	0.516927	NaN	0.51231	59.469	NaN	51.956
P53004	99	P53004	P53004	Biliverdin reductase A	BLVRA	IRQFLNAGKHVLVEYPMTLSLAAAQELWELA	2115	P	3	2717		1	0.00268965	49.25	38.543	49.25	-2.0753	0	1	NaN	NaN	49.25	NaN	NaN
P53384	5	P53384	P53384	Cytosolic Fe-S cluster assembly factor NUBP1	NUBP1	___________MEEVPHDCPGADSAQAGRGA	2123	P	2	2724		0.920125	0.0313246	41.052	41.052	41.052	0.0081525	5516400	0.920125	NaN	NaN	41.052	NaN	NaN
P53396	956	P53396	P53396	ATP-citrate synthase	ACLY	AAAKMFSKAFDSGIIPMEFVNKMKKEGKLIM	2124	P	2	2725		1	0.0321871	106.4	91.022	106.4	-0.3996	270940000	1	NaN	1	106.4	NaN	105.2
P53396	524	P53396	P53396	ATP-citrate synthase	ACLY	VQGMLDFDYVCSRDEPSVAAMVYPFTGDHKQ	2125	P	3	2725		0.999769	0.000265929	51.568	51.568	50.608	-0.47609	372280000	0.999769	NaN	0.99638	50.608	NaN	51.568
P53396	239	P53396	P53396	ATP-citrate synthase	ACLY	TADYICKVKWGDIEFPPPFGREAYPEEAYIA	2132	P	4	2725		0.788025	0.00105244	55.413	49.869	55.413	-1.8657	100730000	0.788025	NaN	NaN	55.413	NaN	NaN
P53618	135	P53618	P53618	Coatomer subunit beta	COPB1	TLRFLCKLKEAELLEPLMPAIRACLEHRHSY	2134	P	2	2733		0.952636	0.000271829	134.08	117.13	134.08	-1.1199	0	0.952636	NaN	NaN	134.08	NaN	NaN
P53618	15	P53618	P53618	Coatomer subunit beta	COPB1	_MTAAENVCYTLINVPMDSEPPSEISLKNDL	2135	P	3	2733		0.998952	2.10452e-06	103.5	97.773	103.5	-0.012656	85076000	0.971475	NaN	0.998952	46.404	NaN	103.5
P53618	625	P53618	P53618	Coatomer subunit beta	COPB1	VDRISLCLKVLSECSPLMNDIFNKECRQSLS	2136	P	3	2733		1	0.00276223	90.223	81.729	90.223	-0.1645	150130000	NaN	NaN	1	NaN	NaN	90.223
P53621	803	P53621	P53621	Coatomer subunit alpha;Xenin;Proxenin	COPA	IDPNAKLLQPPAPIMPLDTNWPLLTVSKGFF	2139	P	3	2734		0.833248	0.00216321	61.222	53.51	61.222	-1.8203	23044000	0.833248	NaN	NaN	61.222	NaN	NaN
P53634	369	P53634	P53634	Dipeptidyl peptidase 1;Dipeptidyl peptidase 1 exclusion domain chain;Dipeptidyl peptidase 1 heavy chain;Dipeptidyl peptidase 1 light chain	CTSC	GCNEALMKLELVHHGPMAVAFEVYDDFLHYK	2140	P	5	2735		1	0.00117428	47.728	41.005	47.728	-0.13913	52401000	NaN	NaN	1	NaN	NaN	47.728
P53814	453	P53814	P53814	Smoothelin	SMTN	EEPGAPLPVAVGTAEPGGSMKTTFTIEIKDG	2144	P	2	2749		0.999997	0.0212422	96.247	82.819	96.247	4.325	0	NaN	NaN	0.999997	NaN	NaN	96.247
P53999	107	P53999	P53999	Activated RNA polymerase II transcriptional coactivator p15	SUB1	PEGEMKPGRKGISLNPEQWSQLKEQISDIDD	2147	P	2	2753		1	0.0298956	87.02	68.187	87.02	1.3162	0	1	NaN	NaN	87.02	NaN	NaN
P54098	116	P54098	P54098	DNA polymerase subunit gamma-1	POLG	RRSVEHLQKHGLWGQPAVPLPDVELRLPPLY	2149	P	5	2754		0.918406	0.00066944	50.704	46.833	50.704	-4.389	22607000	NaN	NaN	0.918406	NaN	NaN	50.704
P54136	257	P54136	P54136	Arginine--tRNA ligase, cytoplasmic	RARS	GTQFGMLIAHLQDKFPDYLTVSPPIGDLQVF	2150	P	5	2757		0.95992	0.00614973	42.782	39.406	42.782	-3.5958	146710000	NaN	NaN	0.95992	NaN	NaN	42.782
P54274	278	P54274	P54274	Telomeric repeat-binding factor 1	TERF1	VVESKRTRTITSQDKPSGNDVEMETEANLDT	2154	P	3	2762		1	0.00530446	66.383	59.66	66.383	-0.13219	109940000	1	NaN	NaN	66.383	NaN	NaN
P54687	359	P54687	P54687	Branched-chain-amino-acid aminotransferase, cytosolic	BCAT1	LYKGETIHIPTMENGPKLASRILSKLTDIQY	2160	P	3	2774		0.988892	0.0106522	66.533	39.563	66.533	-2.0063	31148000	NaN	NaN	0.988892	NaN	NaN	66.533
P54709	79	P54709	P54709	Sodium/potassium-transporting ATPase subunit beta-3	ATP1B3	TLNDEVPKYRDQIPSPGLMVFPKPVTALEYT	2161	P	4	2775		0.922062	0.00101964	78.717	72.141	58.477	1.7426	323330000	0.922062	NaN	NaN	78.717	NaN	NaN
P54709	23	P54709	P54709	Sodium/potassium-transporting ATPase subunit beta-3	ATP1B3	SLNQSLAEWKLFIYNPTTGEFLGRTAKSWGL	2162	P	2	2775		1	0.00943128	99.069	82.19	99.069	-1.3914	0	NaN	NaN	1	NaN	NaN	99.069
P54886	361	P54886	P54886	Delta-1-pyrroline-5-carboxylate synthase;Glutamate 5-kinase;Gamma-glutamyl phosphate reductase	ALDH18A1	GKKVGTFFSEVKPAGPTVEQQGEMARSGGRM	2169	P	2	2786		0.997844	1.84264e-05	105.14	93.619	105.14	-0.71104	106000000	NaN	NaN	0.997844	NaN	NaN	105.14
P55036	45	P55036	P55036	26S proteasome non-ATPase regulatory subunit 4	PSMD4	QDAVNIVCHSKTRSNPENNVGLITLANDCEV	2172	P	3	2790		0.999938	0.0049206	52.685	47.025	52.685	1.5465	9336600	0.999938	NaN	NaN	52.685	NaN	NaN
P55060	940	P55060	P55060	Exportin-2	CSE1L	KIHLAQSLHKLSTACPGRVPSMVSTSLNAEA	2174	P	4	2793		0.547755	2.74918e-09	63.426	59.193	63.426	-0.062295	54685000	NaN	0	0.547755	NaN	NaN	63.426
P55072	472	P55072	P55072	Transitional endoplasmic reticulum ATPase	VCP	SQSNPSALRETVVEVPQVTWEDIGGLEDVKR	2178	P	2	2795		1	0.00212829	79.633	46.429	79.633	-3.1897	0	1	NaN	NaN	79.633	NaN	NaN
P55072	118	P55072	P55072	Transitional endoplasmic reticulum ATPase	VCP	QPCPDVKYGKRIHVLPIDDTVEGITGNLFEV	2180	P	5	2795		0.999956	0.0101508	46.772	42.579	46.772	-4.1914	28365000	NaN	NaN	0.999956	NaN	NaN	46.772
P55196	33	P55196	P55196	Afadin	MLLT4	HHWNANRLDLFEISQPTEDLEFHGVMRFYFQ	2185	P	4	2801		1	0.00349973	40.544	31.998	40.544	-3.8651	46400000	NaN	NaN	1	NaN	NaN	40.544
P55196	443	P55196	P55196	Afadin	MLLT4	VGTEKLDDNSIQLFGPGIQPHHCDLTNMDGV	2186	P	4	2801		0.743284	4.57016e-07	68.291	66.336	63.657	0.11738	222110000	NaN	NaN	0.743284	NaN	NaN	68.291
P55196	1244	P55196	P55196	Afadin	MLLT4	EYFTFPASKSQDRMAPPQNQWPNYEEKPHMH	2188	P	5	2801		0.97671	8.34462e-05	77.984	77.984	77.984	-0.97868	14918000	NaN	NaN	0.97671	NaN	NaN	77.984
P55196	1245	P55196	P55196	Afadin	MLLT4	YFTFPASKSQDRMAPPQNQWPNYEEKPHMHT	2189	P	5	2801		0.972027	8.34462e-05	77.984	77.984	77.984	-0.97868	14918000	NaN	NaN	0.972027	NaN	NaN	77.984
P55196	1256	P55196	P55196	Afadin	MLLT4	RMAPPQNQWPNYEEKPHMHTDSNHSSIAIQR	2190	P	5	2801		0.998657	8.34462e-05	77.984	77.984	77.984	-0.97868	74161000	0.92071	NaN	0.998657	49.088	NaN	77.984
P55786	489	P55786	P55786	Puromycin-sensitive aminopeptidase	NPEPPS	ATEDLWESLENASGKPIAAVMNTWTKQMGFP	2201	P	2	2821		1	0.0036107	78.902	69.496	78.902	-2.8177	0	NaN	NaN	1	NaN	NaN	78.902
P55789	123	P55789	P55789	FAD-linked sulfhydryl oxidase ALR	GFER	AVLHTLAAYYPDLPTPEQQQDMAQFIHLFSK	2202	P	5	2822		0.871602	2.97846e-07	63.516	57.227	63.516	-0.35697	15885000	NaN	NaN	0.871602	NaN	NaN	63.516
P55884	490	P55884	P55884	Eukaryotic translation initiation factor 3 subunit B	EIF3B	GGNIIAFWVPEDKDIPARVTLMQLPTRQEIR	2208	P	4	2826		0.948669	0.00538078	52.92	35.943	52.92	0.148	741640000	0.58919	NaN	0.948669	50.492	NaN	52.92
P55884	80	P55884	P55884	Eukaryotic translation initiation factor 3 subunit B	EIF3B	EVRTEPAAEAEAASGPSESPSPPAAEELPGS	2211	P	4	2826		0.600417	2.89858e-05	41.425	41.247	41.425	-0.80015	102140000	0.600417	NaN	NaN	41.425	NaN	NaN
P55884	84	P55884	P55884	Eukaryotic translation initiation factor 3 subunit B	EIF3B	EPAAEAEAASGPSESPSPPAAEELPGSHAEP	2212	P	4	2826		0.600417	2.89858e-05	41.425	41.247	41.425	-0.80015	102140000	0.600417	NaN	NaN	41.425	NaN	NaN
P55884	86	P55884	P55884	Eukaryotic translation initiation factor 3 subunit B	EIF3B	AAEAEAASGPSESPSPPAAEELPGSHAEPPV	2213	P	4	2826		0.600417	2.89858e-05	41.425	41.247	41.425	-0.80015	102140000	0.600417	NaN	NaN	41.425	NaN	NaN
P55884	87	P55884	P55884	Eukaryotic translation initiation factor 3 subunit B	EIF3B	AEAEAASGPSESPSPPAAEELPGSHAEPPVP	2214	P	4	2826		0.600417	2.89858e-05	41.425	41.247	41.425	-0.80015	102140000	0.600417	NaN	NaN	41.425	NaN	NaN
P55884	93	P55884	P55884	Eukaryotic translation initiation factor 3 subunit B	EIF3B	SGPSESPSPPAAEELPGSHAEPPVPAQGEAP	2215	P	4	2826		0.713449	2.89858e-05	41.425	41.247	41.425	-0.80015	102140000	0.713449	NaN	NaN	41.425	NaN	NaN
P55884	99	P55884	P55884	Eukaryotic translation initiation factor 3 subunit B	EIF3B	PSPPAAEELPGSHAEPPVPAQGEAPGEQARD	2216	P	4	2826		0.693121	2.89858e-05	41.425	41.247	41.425	-0.80015	102140000	0.693121	NaN	NaN	41.425	NaN	NaN
P55884	100	P55884	P55884	Eukaryotic translation initiation factor 3 subunit B	EIF3B	SPPAAEELPGSHAEPPVPAQGEAPGEQARDE	2217	P	4	2826		0.693121	2.89858e-05	41.425	41.247	41.425	-0.80015	102140000	0.693121	NaN	NaN	41.425	NaN	NaN
P55884	401	P55884	P55884	Eukaryotic translation initiation factor 3 subunit B	EIF3B	RYLVTFSPLMDTQDDPQAIIIWDILTGHKKR	2219	P	5	2826		1	0.00127019	45.901	43.987	45.901	0.14342	164830000	0.529333	NaN	1	44.811	NaN	45.901
P56192	442	P56192	P56192	Methionine--tRNA ligase, cytoplasmic	MARS	AVELKKPQCKVCRSCPVVQSSQHLFLDLPKL	2226	P	3	2835		1	0.00095615	82.707	76.743	82.707	1.1783	32637000	1	NaN	NaN	82.707	NaN	NaN
P56270	228	P56270	P56270	Myc-associated zinc finger protein	MAZ	TGAKAGRVPSGAMKMPTMVPLSLLSVPQLSG	2228	P	4	2838		0.769099	1.00333e-11	67.409	67.409	67.409	0.36768	15443000	0.769099	NaN	NaN	67.409	NaN	NaN
P56545	23	P56545	P56545	C-terminal-binding protein 2	CTBP2	KVKRQRLDRICEGIRPQIMNGPLHPRPLVAL	2230	P	5	2847		0.981082	0.00128278	56.303	51.196	56.303	-0.014599	61560000	NaN	NaN	0.981082	NaN	NaN	56.303
P56589	301	P56589	P56589	Peroxisomal biogenesis factor 3	PEX3	RGFSRLLDNMAEFFRPTEQDLQHGNSMNSLS	2231	P	4	2849		0.999932	2.29899e-05	85.097	73.97	55.101	0.30349	105880000	NaN	NaN	0.999932	NaN	NaN	85.097
P57682	50	P57682	P57682	Krueppel-like factor 3	KLF3	GVIYSTPLPEKFFQTPEGLSHGIQMEPVDLT	2232	P	3	2863		0.979395	0.00610443	51.175	43.815	51.175	-0.0018598	9785400	0.979395	NaN	NaN	51.175	NaN	NaN
P58107	913	P58107	P58107	Epiplakin	EPPK1	IDQQLLDQVLAGTISPEALLLMDGVRRYLCG	2237	P	5	2872		1	1.75666e-17	130.01	123.36	130.01	-0.33211	78638000	1	NaN	NaN	130.01	NaN	NaN
P59045	43	P59045	P59045	NACHT, LRR and PYD domains-containing protein 11	NLRP11	KYLARKILDFKLPQFPLIQMTKEELANVLPI	2239	P	2	2879		0.98977	0.0285055	76.1	47.144	65.224	-3.4257	259120000	NaN	NaN	0.98977	NaN	NaN	76.1
P60228	240	P60228	P60228	Eukaryotic translation initiation factor 3 subunit E	EIF3E	HPKGRDNIIDLFLYQPQYLNAIQTMCPHILR	2243	P	3	2890		0.90154	0.0115363	52.685	46.965	52.685	1.7827	21504000	0.90154	NaN	NaN	52.685	NaN	NaN
P60484	38	P60484	P60484	Phosphatidylinositol 3,4,5-trisphosphate 3-phosphatase and dual-specificity protein phosphatase PTEN	PTEN	LDLTYIYPNIIAMGFPAERLEGVYRNNIDDV	2244	P	4	2892		0.997856	5.64224e-05	81.519	77.075	81.519	-1.6428	99172000	0.997856	NaN	NaN	81.519	NaN	NaN
P60602	13	P60602	P60602	Reactive oxygen species modulator 1	ROMO1	___MPVAVGPYGQSQPSCFDRVKMGFVMGCA	2245	P	3	2895		0.999799	0.021082	66.673	61.671	66.673	-0.33165	40162000	0.999799	NaN	NaN	66.673	NaN	NaN
P60660	55	P60660	P60660	Myosin light polypeptide 6	MYL6	GQNPTNAEVLKVLGNPKSDEMNVKVLDFEHF	2247	P	5	2897		1	0.0326591	42.347	42.347	42.347	-0.47286	88811000	NaN	NaN	1	NaN	NaN	42.347
P60709;P63261	70;70	P60709;P63261	P63261	Actin, cytoplasmic 1;Actin, cytoplasmic 1, N-terminally processed;Actin, cytoplasmic 2;Actin, cytoplasmic 2, N-terminally processed	ACTB;ACTG1	GDEAQSKRGILTLKYPIEHGIVTNWDDMEKI	2252	P	5	2898;3061		1	0.0047261	45.836	22.867	45.836	2.4095	31425000	1	NaN	NaN	45.836	NaN	NaN
P60709;P63261	130;130	P60709;P63261	P63261	Actin, cytoplasmic 1;Actin, cytoplasmic 1, N-terminally processed;Actin, cytoplasmic 2;Actin, cytoplasmic 2, N-terminally processed	ACTB;ACTG1	NREKMTQIMFETFNTPAMYVAIQAVLSLYAS	2255	P	3	2898;3061		1	0.00061965	52.122	46.802	42.039	0.32099	50802000	NaN	NaN	1	NaN	NaN	52.122
P60763	140	P60763	P60763	Ras-related C3 botulinum toxin substrate 3	RAC3	TIERLRDKKLAPITYPQGLAMAREIGSVKYL	2257	P	2	2899		0.999942	0.0327211	64.878	57.464	64.878	0.55934	0	0.999942	NaN	NaN	64.878	NaN	NaN
P60842	399	P60842	P60842	Eukaryotic initiation factor 4A-I	EIF4A1	LRDIETFYNTSIEEMPLNVADLI________	2260	P	3	2900		1	0.000137535	78.661	65.034	50.029	0.66373	1273600000	1	NaN	1	78.661	NaN	70.335
P61088	97	P61088	P61088	Ubiquitin-conjugating enzyme E2 N	UBE2N	KLGRICLDILKDKWSPALQIRTVLLSIQALL	2272	P	4	2920		1	0.00659222	63.827	50.2	63.827	-0.78812	47503000	1	NaN	NaN	63.827	NaN	NaN
P61158	6	P61158	P61158	Actin-related protein 3	ACTR3	__________MAGRLPACVVDCGTGYTKLGY	2276	P	2	2923		1	0.00178748	74.46	58.207	74.46	0.048955	36801000	1	NaN	NaN	74.46	NaN	NaN
P61224;A6NIZ1	110;110	P61224	P61224	Ras-related protein Rap-1b;Ras-related protein Rap-1b-like protein	RAP1B	DLREQILRVKDTDDVPMILVGNKCDLEDERV	2288	P	2	2931		1	0.017453	134.25	126.01	134.25	-0.15052	26372000	NaN	NaN	1	NaN	NaN	134.25
P61289	48	P61289	P61289	Proteasome activator complex subunit 3	PSME3	FFPKKLLELDSFLKEPILNIHDLTQIHSDMN	2290	P	5	2936		0.996714	8.49812e-07	51.166	49.827	44.869	-1.5863	132540000	0.996714	NaN	0.860752	44.869	NaN	51.166
P61758	41	P61758	P61758	Prefoldin subunit 3	VBP1	PEAVFVEDVDSFMKQPGNETADTVLKKLDEQ	2296	P	4	2950		0.999953	0.000162854	56.709	48.019	56.709	0.11106	341760000	0.999953	NaN	0.878758	56.709	NaN	44.05
P61764	239	P61764	P61764	Syntaxin-binding protein 1	STXBP1	DKARSQLLILDRGFDPSSPVLHELTFQAMSY	2297	P	4	2951		0.517543	9.40907e-11	82.037	75.977	82.037	0.24145	170720000	0.517543	NaN	NaN	82.037	NaN	NaN
P62263	71	P62263	P62263	40S ribosomal protein S14	RPS14	VTGGMKVKADRDESSPYAAMLAAQDVAQRCK	2313	P	2	2982		1	9.10158e-05	114.69	95.113	114.69	0.81961	252500000	1	NaN	1	96.673	NaN	114.69
P62306	18	P62306	P62306	Small nuclear ribonucleoprotein F	SNRPF	LPLNPKPFLNGLTGKPVMVKLKWGMEYKGYL	2318	P	3	2989		0.998883	0.00661822	44.054	36.777	44.054	-0.54955	22546000	0.998883	NaN	NaN	44.054	NaN	NaN
P62310	83	P62310	P62310	U6 snRNA-associated Sm-like protein LSm3	LSM3	EETYEEIYKSTKRNIPMLFVRGDGVVLVAPP	2319	P	3	2991		0.999998	0.0130005	67.727	59.924	67.727	-2.727	424220000	NaN	NaN	0.999998	NaN	NaN	67.727
P62314	52	P62314	P62314	Small nuclear ribonucleoprotein Sm D1	SNRPD1	NTHLKAVKMTLKNREPVQLETLSIRGNNIRY	2320	P	4	2993		1	0.0212757	56.215	47.391	56.215	-0.39406	50294000	1	NaN	NaN	56.215	NaN	NaN
P62328	5	P62328	P62328	Thymosin beta-4;Hematopoietic system regulatory peptide	TMSB4X	___________MSDKPDMAEIEKFDKSKLKK	2323	P	2	2997		1	0.0246711	67.113	46.413	67.113	-0.8331	8252400	NaN	NaN	1	NaN	NaN	67.113
P62487	126	P62487	P62487	DNA-directed RNA polymerase II subunit RPB7	POLR2G	HSIPSEMEFDPNSNPPCYKTMDEDIVIQQDD	2325	P	3	3003		0.59805	0.00163458	67.994	64.706	67.994	-0.66688	42614000	0.59805	NaN	NaN	67.994	NaN	NaN
P62487	103	P62487	P62487	DNA-directed RNA polymerase II subunit RPB7	POLR2G	VVTQVNKVGLFTEIGPMSCFISRHSIPSEME	2326	P	2	3003		1	0.0112585	103.44	95.529	103.44	-0.46904	74762000	1	NaN	NaN	103.44	NaN	NaN
P62917	206	P62917	P62917	60S ribosomal protein L8	RPL8	AKRNCWPRVRGVAMNPVEHPFGGGNHQHIGK	2339	P	6	3036		0.999883	0.0166788	48.115	44.7	46.678	-0.51922	1141600000	0.999801	0	0.999883	48.115	NaN	46.678
P62979	122	P62979	P62979	Ubiquitin-40S ribosomal protein S27a;Ubiquitin;40S ribosomal protein S27a	RPS27A	KVDENGKISRLRRECPSDECGAGVFMASHFD	2345	P	5	3039		1	0.00864155	52.298	50.883	43.162	0.49601	108040000	1	NaN	1	52.298	NaN	43.162
P63010	496	P63010	P63010	AP-2 complex subunit beta	AP2B1	QLTLLTAIVKLFLKKPSETQELVQQVLSLAT	2351	P	3	3044		0.999997	0.011963	62.032	55.871	62.032	4.4825	0	NaN	NaN	0.999997	NaN	NaN	62.032
P63151	319	P63151	P63151	Serine/threonine-protein phosphatase 2A 55 kDa regulatory subunit B alpha isoform	PPP2R2A	DYLSVKIWDLNMENRPVETYQVHEYLRSKLC	2358	P	3	3051		1	0.0233776	55.881	49.978	55.881	-4.161	0	NaN	NaN	1	NaN	NaN	55.881
P63241;Q6IS14;Q9GZV4	82;82;82	P63241;Q9GZV4	P63241	Eukaryotic translation initiation factor 5A-1;Eukaryotic translation initiation factor 5A-1-like;Eukaryotic translation initiation factor 5A-2	EIF5A;EIF5AL1;EIF5A2	KKYEDICPSTHNMDVPNIKRNDFQLIGIQDG;KKYEDICPSTHNMDVPNIKRNDYQLICIQDG	2362	P	4	3059;7788		0.999185	0.000631315	75.548	66.502	75.548	-1.3835	28749000	0.999185	0	0	75.548	NaN	NaN
P63244	243	P63244	P63244	Guanine nucleotide-binding protein subunit beta-2-like 1;Guanine nucleotide-binding protein subunit beta-2-like 1, N-terminally processed	GNB2L1	YTLDGGDIINALCFSPNRYWLCAATGPSIKI	2364	P	3	3060		1	0.00251792	63.46	58.25	63.46	0.19857	75389000	1	NaN	NaN	63.46	NaN	NaN
P67809	206	P67809	P67809	Nuclease-sensitive element-binding protein 1	YBX1	RRFPPYYMRRPYGRRPQYSNPPVQGEVMEGA	2367	P	4	3066		0.999999	4.69528e-05	64.733	55.82	61.732	-0.32891	52765000	0.999999	NaN	0.99999	64.733	NaN	51.568
P67809	212	P67809	P67809	Nuclease-sensitive element-binding protein 1	YBX1	YMRRPYGRRPQYSNPPVQGEVMEGADNQGAG	2369	P	4	3066		0.999999	0.000150648	61.732	56.301	61.732	-0.32891	35196000	0.999999	NaN	0.999992	61.732	NaN	51.568
P67870	118	P67870	P67870	Casein kinase II subunit beta	CSNK2B	QGDFGYCPRVYCENQPMLPIGLSDIPGEAMV	2371	P	3	3068		0.989064	0.00074592	66.853	60.277	66.853	0.10604	79680000	0.926425	NaN	0.989064	55.469	NaN	66.853
P68104;Q5VTE0	185;185	P68104;Q5VTE0	P68104	Elongation factor 1-alpha 1;Putative elongation factor 1-alpha-like 3	EEF1A1;EEF1A1P5	IVKEVSTYIKKIGYNPDTVAFVPISGWNGDN	2378	P	3	3072;4551		0.607076	0.00135735	41.661	41.661	41.661	0.40084	107330000	0.607076	0	0.561096	41.661	NaN	41.661
P68104	359	P68104	P68104	Elongation factor 1-alpha 1	EEF1A1	VIILNHPGQISAGYAPVLDCHTAHIACKFAE	2385	P	5	3072		0.853997	1.6376e-06	51.203	47.634	40.206	-0.36711	275350000	0.853997	0	0.761635	40.206	NaN	51.203
P68104;Q5VTE0	420;420	P68104;Q5VTE0	P68104	Elongation factor 1-alpha 1;Putative elongation factor 1-alpha-like 3	EEF1A1;EEF1A1P5	VPGKPMCVESFSDYPPLGRFAVRDMRQTVAV	2387	P	3	3072;4551		0.526794	8.57885e-05	73.805	73.805	73.805	0.64518	15063000	0.526794	0	0	73.805	NaN	NaN
P68363;Q71U36;P0DPH8;P0DPH7;Q6PEY2;Q9BQE3	32;32;32;32;32;32	P68363;Q71U36;Q9BQE3	P68363	Tubulin alpha-1B chain;Tubulin alpha-1A chain;Tubulin alpha-3E chain;Tubulin alpha-1C chain	TUBA1B;TUBA1A;TUBA3E;TUBA1C	GNACWELYCLEHGIQPDGQMPSDKTIGGGDD	2391	P	5	3074;5044;7345		0.878796	7.56865e-08	56.475	53.004	56.475	-0.85331	34575000	0.878796	NaN	NaN	56.475	NaN	NaN
P78310	307	P78310	P78310	Coxsackievirus and adenovirus receptor	CXADR	RSYIGSNHSSLGSMSPSNMEGYSKTQYNQVP	2394	P	3	3082		1	0.0230809	41.491	37.54	41.491	-0.39393	33068000	NaN	NaN	1	NaN	NaN	41.491
P78312	995	P78312	P78312	Protein FAM193A	FAM193A	ETSSHSPSRHMNHSEPRPGLGADGDAADPVD	2395	P	5	3083		0.546218	0.00065274	59.282	56.402	59.282	-0.16877	8393700	0.546218	NaN	NaN	59.282	NaN	NaN
P78312	1124	P78312	P78312	Protein FAM193A	FAM193A	KKQLNHIKDEKSNPTPMEPTSPGEHQQNSKL	2396	P	3	3083		0.996218	7.29816e-06	109.03	100.64	109.03	0.66949	16355000	0.996218	NaN	NaN	109.03	NaN	NaN
P78318	260	P78318	P78318	Immunoglobulin-binding protein 1	IGBP1	LTRNMAQAKVFGAGYPSLPTMTVSDWYEQHR	2397	P	4	3087		1	0.0059027	40.369	31.402	40.369	-0.12197	101900000	1	NaN	NaN	40.369	NaN	NaN
P78318	263	P78318	P78318	Immunoglobulin-binding protein 1	IGBP1	NMAQAKVFGAGYPSLPTMTVSDWYEQHRKYG	2398	P	4	3087		1	0.0059027	40.369	31.402	40.369	-0.12197	101900000	1	NaN	NaN	40.369	NaN	NaN
P78344	503	P78344	P78344	Eukaryotic translation initiation factor 4 gamma 2	EIF4G2	PKLQPQITMIPPSAQPPRTQTPPLGQTPQLG	2401	P	3	3092		0.836794	0.00864073	47.429	31.159	47.429	-1.0974	4714400	NaN	NaN	0.836794	NaN	NaN	47.429
P78344	504	P78344	P78344	Eukaryotic translation initiation factor 4 gamma 2	EIF4G2	KLQPQITMIPPSAQPPRTQTPPLGQTPQLGL	2402	P	3	3092		0.836794	0.00864073	47.429	31.159	47.429	-1.0974	4714400	NaN	NaN	0.836794	NaN	NaN	47.429
P78344	509	P78344	P78344	Eukaryotic translation initiation factor 4 gamma 2	EIF4G2	ITMIPPSAQPPRTQTPPLGQTPQLGLKTNPP	2403	P	3	3092		0.836789	0.00864073	47.429	31.159	47.429	-1.0974	4714400	NaN	NaN	0.836789	NaN	NaN	47.429
P78344	510	P78344	P78344	Eukaryotic translation initiation factor 4 gamma 2	EIF4G2	TMIPPSAQPPRTQTPPLGQTPQLGLKTNPPL	2404	P	3	3092		0.836789	0.00864073	47.429	31.159	47.429	-1.0974	4714400	NaN	NaN	0.836789	NaN	NaN	47.429
P78344	515	P78344	P78344	Eukaryotic translation initiation factor 4 gamma 2	EIF4G2	SAQPPRTQTPPLGQTPQLGLKTNPPLIQEKP	2405	P	3	3092		0.612809	0.00864073	47.429	31.159	47.429	-1.0974	4714400	NaN	NaN	0.612809	NaN	NaN	47.429
P78344	416	P78344	P78344	Eukaryotic translation initiation factor 4 gamma 2	EIF4G2	HRSNQLFNGHGGHIMPPTQSQFGEMGGKFMK	2407	P	3	3092		0.855487	4.22612e-05	84.933	84.933	84.933	-0.35474	11190000	NaN	NaN	0.855487	NaN	NaN	84.933
P78344	417	P78344	P78344	Eukaryotic translation initiation factor 4 gamma 2	EIF4G2	RSNQLFNGHGGHIMPPTQSQFGEMGGKFMKS	2408	P	4	3092		0.576194	0.00106855	56.292	49.493	56.292	-1.9	77497000	NaN	NaN	0.576194	NaN	NaN	56.292
P78362	665	P78362	P78362	SRSF protein kinase 2;SRSF protein kinase 2 N-terminal;SRSF protein kinase 2 C-terminal	SRPK2	GWPHEDAAQFTDFLIPMLEMVPEKRASAGEC	2413	P	4	3099		0.92862	0.00362835	48.337	48.337	48.337	-1.2505	173700000	NaN	NaN	0.92862	NaN	NaN	48.337
P78406	88	P78406	P78406	mRNA export factor	RAE1	DSGQTIPKAQQMHTGPVLDVCWSDDGSKVFT	2415	P	3	3107		1	0.00775567	56.529	53.241	44.729	-1.3773	35651000	1	NaN	NaN	56.529	NaN	NaN
P78417	179	P78417	P78417	Glutathione S-transferase omega-1	GSTO1	FFGGNSISMIDYLIWPWFERLEAMKLNECVD	2416	P	4	3109		0.998486	0.000950169	40.952	40.952	40.952	-3.2068	22942000	NaN	NaN	0.998486	NaN	NaN	40.952
P78527	2096	P78527	P78527	DNA-dependent protein kinase catalytic subunit	PRKDC	LELEMDELNRHECMAPLTALVKHMHRSLGPP	2419	P	5	3113		0.999998	3.98575e-05	76.162	76.162	76.162	-1.4354	256590000	0.999948	NaN	0.999998	51.566	NaN	76.162
P78527	903	P78527	P78527	DNA-dependent protein kinase catalytic subunit	PRKDC	REKRLSFAVPFREMKPVIFLDVFLPRVTELA	2420	P	3	3113		1	0.00383674	99.941	89.66	99.941	0.040972	3014000000	1	NaN	0.981509	99.941	NaN	95.651
P78527	1493	P78527	P78527	DNA-dependent protein kinase catalytic subunit	PRKDC	SVGTELLSLVYKGIAPGDERQCLPSLDLSCK	2421	P	3	3113		0.887873	0.0273435	62.765	48.293	62.765	1.0829	62652000	0.887873	NaN	NaN	62.765	NaN	NaN
P78527	897	P78527	P78527	DNA-dependent protein kinase catalytic subunit	PRKDC	SYVAWDREKRLSFAVPFREMKPVIFLDVFLP	2426	P	3	3113		0.993027	4.32876e-08	121.47	118.92	121.47	0.64884	6008600000	0.943525	NaN	0.993027	100.7	NaN	121.47
P78527	3214	P78527	P78527	DNA-dependent protein kinase catalytic subunit	PRKDC	PLPEDNSMNVDQDGDPSDRMEVQEQEEDISS	2428	P	4	3113		0.997061	0.00010765	56.637	56.637	56.637	0.18948	24295000	NaN	NaN	0.997061	NaN	NaN	56.637
P78527	3175	P78527	P78527	DNA-dependent protein kinase catalytic subunit	PRKDC	LLNTWTNRYPDAKMDPMNIWDDIITNRCFFL	2429	P	2	3113		1	0.00751608	133.05	125.67	133.05	-0.10372	146640000	1	NaN	1	64.244	NaN	133.05
P78559	2665	P78559	P78559	Microtubule-associated protein 1A;MAP1A heavy chain;MAP1 light chain LC2	MAP1A	TTSQVTPAEEKDGHSPMSKGLVNGLKAGPMA	2435	P	3	3119		0.999864	0.000366187	96.016	87.829	96.016	0.89991	13422000	0.999864	NaN	NaN	96.016	NaN	NaN
P84098	26	P84098	P84098	60S ribosomal protein L19	RPL19	ASSVLRCGKKKVWLDPNETNEIANANSRQQI	2445	P	4	3159		1	0.0344262	42.118	36.908	42.118	0.83857	14882000	1	NaN	NaN	42.118	NaN	NaN
P85037	520	P85037	P85037	Forkhead box protein K1	FOXK1	SQQPAGHAIHVVQQAPTVTMVRVVTTSANSA	2447	P	4	3164		0.864072	8.26891e-05	68.516	68.516	68.516	0.13885	74456000	NaN	NaN	0.864072	NaN	NaN	68.516
P86791;P86790	109;109	P86791	P86791	Vacuolar fusion protein CCZ1 homolog;Vacuolar fusion protein CCZ1 homolog B	CCZ1;CCZ1B	NEPEENFWMVMVVRNPIIEKQSKDGKPVIEY	2448	P	4	3168		0.992749	0.00135772	60.991	60.991	60.991	-1.0491	10450000	NaN	NaN	0.992749	NaN	NaN	60.991
Q00059	123	Q00059	Q00059	Transcription factor A, mitochondrial	TFAM	QVYKEEISRFKEQLTPSQIMSLEKEIMDKHL	2452	P	2	3187		1	0.0285754	75.695	51.544	75.695	3.6618	0	NaN	NaN	1	NaN	NaN	75.695
Q00325	182	Q00325	Q00325	Phosphate carrier protein, mitochondrial	SLC25A3	AASASAEFFADIALAPMEAAKVRIQTQPGYA	2453	P	3	3189		1	0.00230493	57.145	50.568	53.998	-1.9999	21914000	NaN	NaN	1	NaN	NaN	57.145
Q00341	691	Q00341	Q00341	Vigilin	HDLBP	IRSIMEECGGVHIHFPVEGSGSDTVVIRGPS	2455	P	4	3190		1	0.000581928	57.278	44.601	57.278	0.54089	103950000	NaN	NaN	1	NaN	NaN	57.278
Q00534	244	Q00534	Q00534	Cyclin-dependent kinase 6	CDK6	GKILDVIGLPGEEDWPRDVALPRQAFHSKSA	2456	P	3	3192		0.999711	3.89991e-05	94.384	82.428	94.384	-0.65448	27330000	0.999711	NaN	NaN	94.384	NaN	NaN
Q00534	250	Q00534	Q00534	Cyclin-dependent kinase 6	CDK6	IGLPGEEDWPRDVALPRQAFHSKSAQPIEKF	2457	P	3	3192		0.99844	3.89991e-05	94.384	82.428	94.384	-0.65448	27330000	0.99844	NaN	NaN	94.384	NaN	NaN
Q00535	228	Q00535	Q00535	Cyclin-dependent-like kinase 5	CDK5	KRIFRLLGTPTEEQWPSMTKLPDYKPYPMYP	2458	P	2	3193		0.999998	0.0288033	97.163	91.317	97.163	-1.0678	49987000	0.999998	NaN	NaN	97.163	NaN	NaN
Q00610	22	Q00610	Q00610	Clathrin heavy chain 1	CLTC	IRFQEHLQLQNLGINPANIGFSTLTMESDKF	2460	P	3	3198		0.999901	0.000242023	44.317	42.929	44.317	-0.49676	1484000	0.999901	NaN	NaN	44.317	NaN	NaN
Q00610	873	Q00610	Q00610	Clathrin heavy chain 1	CLTC	LLPWLEARIHEGCEEPATHNALAKIYIDSNN	2462	P	3	3198		1	0.0221595	53.777	42.962	48.177	0.13568	574120000	1	NaN	NaN	53.777	NaN	NaN
Q00653	596	Q00653	Q00653	Nuclear factor NF-kappa-B p100 subunit;Nuclear factor NF-kappa-B p52 subunit	NFKB2	LLQSGAPAVPQLLHMPDFEGLYPVHLAVRAR	2473	P	3	3200		0.886148	0.000617108	53.968	49.483	53.968	-1.5597	43698000	NaN	NaN	0.886148	NaN	NaN	53.968
Q00839	51	Q00839	Q00839	Heterogeneous nuclear ribonucleoprotein U	HNRNPU	ERLQAALDDEEAGGRPAMEPGNGSLDLGGDS	2475	P	4	3204		0.998829	2.05881e-13	133.66	132.11	133.66	1.3354	89538000	NaN	NaN	0.998829	NaN	NaN	133.66
Q00839	468	Q00839	Q00839	Heterogeneous nuclear ribonucleoprotein U	HNRNPU	CAVEFNFGQKEKPYFPIPEEYTFIQNVPLED	2477	P	4	3204		0.999197	0.00758657	67.979	61.949	67.979	-0.5517	116180000	0.999197	NaN	NaN	67.979	NaN	NaN
Q00839	470	Q00839	Q00839	Heterogeneous nuclear ribonucleoprotein U	HNRNPU	VEFNFGQKEKPYFPIPEEYTFIQNVPLEDRV	2478	P	4	3204		0.999372	0.00758657	67.979	61.949	67.979	-0.5517	116180000	0.999372	NaN	NaN	67.979	NaN	NaN
Q00839	443	Q00839	Q00839	Heterogeneous nuclear ribonucleoprotein U	HNRNPU	LGVAFKISKEVLAGRPLFPHVLCHNCAVEFN	2479	P	5	3204		0.793501	0.00839723	42.746	37.202	42.746	-0.11972	31004000	NaN	NaN	0.793501	NaN	NaN	42.746
Q00994	14	Q00994	Q00994	Protein BEX3	NGFRAP1	__MANIHQENEEMEQPMQNGEEDRPLGGGEG	2480	P	4	3206		0.996342	2.80773e-06	55.314	55.314	55.314	-1.4331	9055200	NaN	NaN	0.996342	NaN	NaN	55.314
Q01484	3924	Q01484	Q01484	Ankyrin-2	ANK2	SSEGTEKEEIMVQGMPQEPVNIEEGDGYSKV	2487	P	3	3219		0.868301	0.0157244	45.011	45.011	41.208	2.4803	13777000	NaN	NaN	0.868301	NaN	NaN	45.011
Q01484	1018	Q01484	Q01484	Ankyrin-2	ANK2	RVTCRLVKRHRLATMPPMVEGEGLASRLIEV	2488	P	2	3219		0.586952	0.0315466	56.225	56.225	56.225	-0.72544	40391000	0.586952	NaN	NaN	56.225	NaN	NaN
Q01518	96	Q01518	Q01518	Adenylyl cyclase-associated protein 1	CAP1	KLERALLVTASQCQQPAENKLSDLLAPISEQ	2490	P	2	3220		1	0.0122151	123.51	106.67	97.813	0.58701	180380000	1	NaN	NaN	123.51	NaN	NaN
Q01518	148	Q01518	Q01518	Adenylyl cyclase-associated protein 1	CAP1	AVSESIQALGWVAMAPKPGPYVKEMNDAAMF	2491	P	4	3220		1	0.000207109	67.899	61.804	67.899	-0.031146	91667000	0.812477	NaN	1	57.902	NaN	67.899
Q01518	150	Q01518	Q01518	Adenylyl cyclase-associated protein 1	CAP1	SESIQALGWVAMAPKPGPYVKEMNDAAMFYT	2492	P	4	3220		1	0.000207109	67.899	61.804	67.899	-0.031146	91667000	0.812477	NaN	1	57.902	NaN	67.899
Q01518	152	Q01518	Q01518	Adenylyl cyclase-associated protein 1	CAP1	SIQALGWVAMAPKPGPYVKEMNDAAMFYTNR	2493	P	4	3220		1	0.000207109	67.899	61.804	67.899	-0.031146	42784000	NaN	NaN	1	NaN	NaN	67.899
Q01780	533	Q01780	Q01780	Exosome component 10	EXOSC10	DKTARREDESYGYVLPNHMMLKIAEELPKEP	2496	P	4	3227		1	0.00942921	58.671	53.242	58.671	-0.14814	53994000	NaN	NaN	1	NaN	NaN	58.671
Q01826	487	Q01826	Q01826	DNA-binding protein SATB1	SATB1	PQVKTATIATERNGKPENNTMNINASIYDEI	2497	P	4	3230		1	0.0034812	57.945	52.68	57.945	-0.77922	16365000	NaN	NaN	1	NaN	NaN	57.945
Q01831	764	Q01831	Q01831	DNA repair protein complementing XP-C cells	XPC	GKVPRNEFGNVYLFLPSMMPIGCVQLNLPNL	2498	P	3	3231		0.976091	2.71888e-05	112.13	106.92	112.13	1.4851	22273000	NaN	NaN	0.976091	NaN	NaN	112.13
Q01844	480	Q01844	Q01844	RNA-binding protein EWS	EWSR1	GMPPPLRGGPGGPGGPGGPMGRMGGRGGDRG	2499	P	2	3232		0.727842	0.00604893	110.14	89.806	110.14	-0.48078	0	0.727842	NaN	NaN	110.14	NaN	NaN
Q02040	194	Q02040	Q02040	A-kinase anchor protein 17A	AKAP17A	EKFGEIRNVDIPMLDPYREEMTGRNFHTFSF	2503	P	3	3239		0.735267	0.00788229	61.962	61.962	61.962	-0.79861	55671000	0.735267	NaN	NaN	61.962	NaN	NaN
Q02241	824	Q02241	Q02241	Kinesin-like protein KIF23	KIF23	HRRSRSAGDRWVDHKPASNMQTETVMQPHVP	2507	P	4	3248		0.853867	0.0246204	94.606	94.606	94.606	0.062533	141670000	0.784118	NaN	0.853867	64.701	NaN	94.606
Q02252	531	Q02252	Q02252	Methylmalonate-semialdehyde dehydrogenase [acylating], mitochondrial	ALDH6A1	WKEEDATLSSPAVVMPTMGR___________	2508	P	3	3249		0.997264	0.0283882	52.707	42.969	52.707	-0.2119	19975000	0.997264	NaN	NaN	52.707	NaN	NaN
Q02252	480	Q02252	Q02252	Methylmalonate-semialdehyde dehydrogenase [acylating], mitochondrial	ALDH6A1	DVGQVGVNVPIPVPLPMFSFTGSRSSFRGDT	2509	P	3	3249		0.755273	0.000247801	61.112	50.964	45.511	2.3607	92823000	0.755273	NaN	0.722552	45.511	NaN	61.112
Q02790	17	Q02790	Q02790	Peptidyl-prolyl cis-trans isomerase FKBP4;Peptidyl-prolyl cis-trans isomerase FKBP4, N-terminally processed	FKBP4	TAEEMKATESGAQSAPLPMEGVDISPKQDEG	2511	P	3	3261		0.570649	1.99352e-08	68.741	66.826	64.508	0.95272	68627000	0	0	0.570649	NaN	NaN	68.741
Q02833	233	Q02833	Q02833	Ras association domain-containing protein 7	RASSF7	EAELQLAAEAPGPPSPMASATERLHQDLAVQ	2517	P	3	3264		0.731278	0.000795906	66.017	58.914	66.017	0.21912	15702000	NaN	NaN	0.731278	NaN	NaN	66.017
Q02952	443	Q02952	Q02952	A-kinase anchor protein 12	AKAP12	TEEQKTEVEETAGSVPAEELVEMDAEPQEAE	2526	P	4	3268		0.887734	0.000693916	44.674	41.235	44.674	0.43178	14038000	NaN	NaN	0.887734	NaN	NaN	44.674
Q03164	2119	Q03164	Q03164	Histone-lysine N-methyltransferase 2A;MLL cleavage product N320;MLL cleavage product C180	KMT2A	ESSSKESQNTAEIISPPSPDRPPHSQTSGSC	2531	P	4	3278		1	0.00176295	41.914	15.748	41.914	-1.103	27360000	1	NaN	NaN	41.914	NaN	NaN
Q03164	2120	Q03164	Q03164	Histone-lysine N-methyltransferase 2A;MLL cleavage product N320;MLL cleavage product C180	KMT2A	SSSKESQNTAEIISPPSPDRPPHSQTSGSCY	2532	P	4	3278		1	0.00176295	41.914	15.748	41.914	-1.103	27360000	1	NaN	NaN	41.914	NaN	NaN
Q03164	2122	Q03164	Q03164	Histone-lysine N-methyltransferase 2A;MLL cleavage product N320;MLL cleavage product C180	KMT2A	SKESQNTAEIISPPSPDRPPHSQTSGSCYYH	2533	P	4	3278		1	0.00176295	41.914	15.748	41.914	-1.103	27360000	1	NaN	NaN	41.914	NaN	NaN
Q03164	2125	Q03164	Q03164	Histone-lysine N-methyltransferase 2A;MLL cleavage product N320;MLL cleavage product C180	KMT2A	SQNTAEIISPPSPDRPPHSQTSGSCYYHVIS	2534	P	4	3278		1	0.00176295	41.914	15.748	41.914	-1.103	27360000	1	NaN	NaN	41.914	NaN	NaN
Q03164	2126	Q03164	Q03164	Histone-lysine N-methyltransferase 2A;MLL cleavage product N320;MLL cleavage product C180	KMT2A	QNTAEIISPPSPDRPPHSQTSGSCYYHVISK	2535	P	4	3278		1	0.00176295	41.914	15.748	41.914	-1.103	27360000	1	NaN	NaN	41.914	NaN	NaN
Q03519	451	Q03519	Q03519	Antigen peptide transporter 2	TAP2	NVGAAEKVFSYMDRQPNLPSPGTLAPTTLQG	2539	P	3	3287		0.993151	0.0200978	50.723	48.44	50.723	0.31986	63163000	NaN	NaN	0.993151	NaN	NaN	50.723
Q04323	16	Q04323	Q04323	UBX domain-containing protein 1	UBXN1	MAELTALESLIEMGFPRGRAEKALALTGNQG	2541	P	2	3293		1	0.000352726	70.942	54.409	70.942	-0.16671	0	1	NaN	NaN	70.942	NaN	NaN
Q04323	192	Q04323	Q04323	UBX domain-containing protein 1	UBXN1	KKYGGSVGSQPPPVAPEPGPVPSSPSQEPPT	2544	P	3	3293		0.67578	0.00201775	47.66	30.648	47.66	-1.0765	139910000	NaN	0	0.67578	NaN	NaN	47.66
Q04637	36	Q04637	Q04637	Eukaryotic translation initiation factor 4 gamma 1	EIF4G1	PAFPPGQTAPVVFSTPQATQMNTPSQPRQHF	2551	P	4	3295		0.588129	4.07801e-05	43.781	42.617	43.781	-0.21302	32566000	NaN	NaN	0.588129	NaN	NaN	43.781
Q04726	414	Q04726	Q04726	Transducin-like enhancer protein 3	TLE3	MSAAAAAAAAAYGRSPMVSFGAVGFDPHPPM	2558	P	3	3299		0.999991	0.0104431	58.01	50.793	58.01	-0.39936	71465000	0.999991	NaN	NaN	58.01	NaN	NaN
Q04760	167	Q04760	Q04760	Lactoylglutathione lyase	GLO1	KPDDGKMKGLAFIQDPDGYWIEILNPNKMAT	2559	P	2	3302		1	0.00800516	91.914	80.859	71.176	1.1638	216960000	0.999971	NaN	1	91.914	NaN	71.176
Q04760	177	Q04760	Q04760	Lactoylglutathione lyase	GLO1	AFIQDPDGYWIEILNPNKMATLM________	2560	P	2	3302		1	0.0098875	71.176	49.626	71.176	1.1638	147490000	NaN	NaN	1	NaN	NaN	71.176
Q04864	530	Q04864	Q04864	Proto-oncogene c-Rel	REL	LSMNLENPSCNSVLDPRDLRQLHQMSSSSMS	2562	P	2	3304		0.732069	0.00314835	67.456	53.794	67.456	2.5256	0	0.732069	NaN	NaN	67.456	NaN	NaN
Q05397	410	Q05397	Q05397	Focal adhesion kinase 1	PTK2	DDYAEIIDEEDTYTMPSTRDYEIQRERIELG	2573	P	3	3314		1	0.000983547	57.688	53.398	57.688	-0.31531	8154500	1	NaN	NaN	57.688	NaN	NaN
Q05513	189	Q05513	Q05513	Protein kinase C zeta type	PRKCZ	GLVPLTCRKHMDSVMPSQEPPVDDKNEDADL	2575	P	4	3317		0.761872	1.03735e-06	59.954	59.954	59.954	0.32037	22822000	NaN	NaN	0.761872	NaN	NaN	59.954
Q05639	274	Q05639	Q05639	Elongation factor 1-alpha 2	EEF1A2	IGTVPVGRVETGILRPGMVVTFAPVNITTEV	2578	P	3	3319		1	1.53782e-26	162.01	155.06	162.01	0.3315	1753800000	1	NaN	1	162.01	NaN	124.81
Q06481	733	Q06481	Q06481	Amyloid-like protein 2	APLP2	KRQYGTISHGIVEVDPMLTPEERHLNKMQNH	2583	P	4	3340		0.987133	0.000505371	70.352	62.73	70.352	-0.025909	11002000	NaN	NaN	0.987133	NaN	NaN	70.352
Q06547	74	Q06547	Q06547	GA-binding protein subunit beta-1	GABPB1	RAGVSRDARTKVDRTPLHMAASEGHASIVEV	2584	P	5	3342		1	0.00249573	53.779	51.306	53.779	0.4949	7240900	NaN	NaN	1	NaN	NaN	53.779
Q06609	83	Q06609	Q06609	DNA repair protein RAD51 homolog 1	RAD51	EAKADKILAEAAKLVPMGFTTATEFHQRRSE	2585	P	3	3344		1	0.00129807	82.102	70.831	82.102	-0.44712	148410000	1	NaN	NaN	82.102	NaN	NaN
Q07021	189	Q07021	Q07021	Complement component 1 Q subcomponent-binding protein, mitochondrial	C1QBP	KNDDGKKALVLDCHYPEDEVGQEDEAESDIF	2589	P	3	3350		1	0.000155048	91.416	89.293	77.641	0.076861	442050000	1	NaN	1	91.416	NaN	67.33
Q07075	530	Q07075	Q07075	Glutamyl aminopeptidase	ENPEP	KTSDFWAALEEASRLPVKEVMDTWTRQMGYP	2590	P	4	3352		1	0.0319972	42.454	31.747	42.454	-1.3998	19014000	NaN	NaN	1	NaN	NaN	42.454
Q07157	1696	Q07157	Q07157	Tight junction protein ZO-1	TJP1	ILPPLDKEKGETLLSPLVMCGPHGLKFLKPV	2591	P	4	3353		0.821893	0.0016129	50.857	39.341	50.857	-0.30875	18440000	NaN	NaN	0.821893	NaN	NaN	50.857
Q07666	257	Q07666	Q07666	KH domain-containing, RNA-binding, signal transduction-associated protein 1	KHDRBS1	ALMAHAMEEVKKFLVPDMMDDICQEQFLELS	2594	P	3	3356		1	0.000206788	91.583	91.583	91.583	-0.21853	31744000	1	NaN	NaN	91.583	NaN	NaN
Q07666	237	Q07666	Q07666	KH domain-containing, RNA-binding, signal transduction-associated protein 1	KHDRBS1	HLNMDLHVFIEVFGPPCEAYALMAHAMEEVK	2598	P	5	3356		0.867929	3.16831e-05	55.895	51.537	55.895	-0.048679	31142000	NaN	NaN	0.867929	NaN	NaN	55.895
Q07889	594	Q07889	Q07889	Son of sevenless homolog 1	SOS1	EPDSEENIIFEENMQPKAGIPIIKAGTVIKL	2599	P	3	3363		0.999969	0.0128588	53.779	50.492	53.779	-0.56818	4324600	0.999969	NaN	NaN	53.779	NaN	NaN
Q07955	129	Q07955	Q07955	Serine/arginine-rich splicing factor 1	SRSF1	PPSRRSENRVVVSGLPPSGSWQDLKDHMREA	2601	P	5	3367		1	0.0320534	55.469	43.503	55.469	-0.13029	84155000	1	NaN	NaN	55.469	NaN	NaN
Q07955	130	Q07955	Q07955	Serine/arginine-rich splicing factor 1	SRSF1	PSRRSENRVVVSGLPPSGSWQDLKDHMREAG	2602	P	5	3367		1	0.0320534	55.469	43.503	55.469	-0.13029	84155000	1	NaN	NaN	55.469	NaN	NaN
Q08209	428	Q08209	Q08209	Serine/threonine-protein phosphatase 2B catalytic subunit alpha isoform	PPP3CA	LREESESVLTLKGLTPTGMLPSGVLSGGKQT	2603	P	3	3372		0.956664	1.87296e-05	82.058	73.145	82.058	0.12741	79484000	NaN	NaN	0.956664	NaN	NaN	82.058
Q08211	1126	Q08211	Q08211	ATP-dependent RNA helicase A	DHX9	VVEVTKQPAIISQLDPVNERMLNMIRQISRP	2604	P	4	3373		0.999498	0.000151242	58.11	58.11	53.615	1.2491	147960000	NaN	NaN	0.999498	NaN	NaN	58.11
Q08211	674	Q08211	Q08211	ATP-dependent RNA helicase A	DHX9	GWNLIYTMQKHLEMNPHFGSHRYQILPLHSQ	2610	P	7	3373		0.984516	2.36459e-05	66.793	61.788	66.793	-0.34533	196850000	NaN	NaN	0.984516	NaN	NaN	66.793
Q08257	49	Q08257	Q08257	Quinone oxidoreductase	CRYZ	KDHQVLIKVHACGVNPVETYIRSGTYSRKPL	2613	P	3	3374		1	0.0352349	55.314	34.887	55.314	-0.040601	55118000	1	NaN	NaN	55.314	NaN	NaN
Q08380	412	Q08380	Q08380	Galectin-3-binding protein	LGALS3BP	LNLTEDTYKPRIYTSPTWSAFVTDSSWSARK	2614	P	2	3381		1	0.0119739	88.552	73.676	88.552	-4.4221	0	NaN	NaN	1	NaN	NaN	88.552
Q08623	93	Q08623	Q08623	Pseudouridine-5'-phosphatase	HDHD1	SQTKLKEVFPTAALMPGAEKLIIHLRKHGIP	2616	P	5	3386		0.980787	0.0192867	43.497	42.761	43.497	-0.01165	8111400	NaN	NaN	0.980787	NaN	NaN	43.497
Q08945	436	Q08945	Q08945	FACT complex subunit SSRP1	SSRP1	KKLNIKNRGLKEGMNPSYDEYADSDEDQHDA	2617	P	4	3389		1	8.48498e-05	81.341	81.129	81.341	0.26951	22468000	1	NaN	NaN	81.341	NaN	NaN
Q08AM6	521	Q08AM6	Q08AM6	Protein VAC14 homolog	VAC14	LNTSGTKGLECSPSTPTMNSYFYKFMINLLK	2618	P	2	3395		0.999967	0.000207865	143.17	139.29	143.17	-0.027394	45456000	NaN	NaN	0.999967	NaN	NaN	143.17
Q08J23	205	Q08J23	Q08J23	tRNA (cytosine(34)-C(5))-methyltransferase	NSUN2	KTTQLIEMLHADMNVPFPEGFVIANDVDNKR	2625	P	4	3398		0.976311	3.7783e-06	74.838	74.838	74.838	-0.54287	316600000	NaN	NaN	0.976311	NaN	NaN	74.838
Q09161	301	Q09161	Q09161	Nuclear cap-binding protein subunit 1	NCBP1	RVIFRMFDYTDDPEGPVMPGSHSVERFVIEE	2628	P	3	3401		0.889045	0.0153153	47.397	47.397	47.397	-0.85212	7922600	0.889045	NaN	NaN	47.397	NaN	NaN
Q09161	598	Q09161	Q09161	Nuclear cap-binding protein subunit 1	NCBP1	KLHVLRVMFEVWRNHPQMIAVLVDKMIRTQI	2629	P	2	3401		1	1.85004e-07	125.74	97.338	125.74	0.21842	156990000	1	NaN	1	125.74	NaN	108.47
Q09666	1416	Q09666	Q09666	Neuroblast differentiation-associated protein AHNAK	AHNAK	EVDVKLPKADVDVSGPKMDAEVPDVNIEGPD	2631	P	3	3404		0.999736	0.00408052	69.619	66.345	69.619	-1.018	68178000	0.999736	NaN	NaN	69.619	NaN	NaN
Q09666	2451	Q09666	Q09666	Neuroblast differentiation-associated protein AHNAK	AHNAK	LKGPKFKMPDMHFKAPNISMPDVDLNLKGPK	2634	P	3	3404		0.945896	0.019023	70.584	60.927	70.584	0.58954	49471000	NaN	NaN	0.945896	NaN	NaN	70.584
Q09666	2964	Q09666	Q09666	Neuroblast differentiation-associated protein AHNAK	AHNAK	PKFKMPEMNIKAPKIPMPDFDLHLKGPKVKG	2636	P	4	3404		0.99724	0.00414911	79.646	79.646	71.879	-0.19588	327350000	0.944238	NaN	0.99724	79.646	NaN	71.879
Q09666	3468	Q09666	Q09666	Neuroblast differentiation-associated protein AHNAK	AHNAK	APEVNLNAPDVDVHGPDWNLKMPKMKMPKFS	2639	P	5	3404		0.849524	0.00108547	50.499	44.272	50.499	0.22461	57832000	NaN	0	0.849524	NaN	NaN	50.499
Q09666	1383	Q09666	Q09666	Neuroblast differentiation-associated protein AHNAK	AHNAK	APDVDVHGPDWHLKMPKVKMPKFSMPGFKGE	2641	P	5	3404		0.991362	0.0039927	52.853	44.358	52.853	-0.7042	30926000	NaN	NaN	0.991362	NaN	NaN	52.853
Q09666	2807	Q09666	Q09666	Neuroblast differentiation-associated protein AHNAK	AHNAK	KADIDVSGPKVDVECPDVNIEGPEGKWKSPK	2642	P	2	3404		1	0.0256933	95.401	87.297	95.401	-0.41266	11706000	1	NaN	NaN	95.401	NaN	NaN
Q09666	5320	Q09666	Q09666	Neuroblast differentiation-associated protein AHNAK	AHNAK	NLKGPSLKGDLDASVPSMKVHAPGLNLSGVG	2643	P	4	3404		0.9993	0.00116966	61.732	45.461	61.732	0.25382	46431000	NaN	NaN	0.9993	NaN	NaN	61.732
Q10471	287	Q10471	Q10471	Polypeptide N-acetylgalactosaminyltransferase 2;Polypeptide N-acetylgalactosaminyltransferase 2 soluble form	GALNT2	GGFDWNLVFKWDYMTPEQRRSRQGNPVAPIK	2644	P	4	3419		1	0.0123125	55.383	48.949	55.383	-0.89457	23186000	NaN	NaN	1	NaN	NaN	55.383
Q10570	379	Q10570	Q10570	Cleavage and polyadenylation specificity factor subunit 1	CPSF1	KAAASVLTTSMVTMEPGYLFLGSRLGNSLLL	2647	P	4	3422		1	0.000103341	86.449	69.828	86.449	0.14918	69564000	NaN	NaN	1	NaN	NaN	86.449
Q11206	252	Q11206	Q11206	CMP-N-acetylneuraminate-beta-galactosamide-alpha-2,3-sialyltransferase 4	ST3GAL4	MEIAADKLLSLPMQQPRKIKQKPTTGLLAIT	2655	P	3	3425		0.526108	0.000164742	77.847	77.847	77.847	0.62552	37402000	NaN	NaN	0.526108	NaN	NaN	77.847
Q12765	289	Q12765	Q12765	Secernin-1	SCRN1	TTASGVSVLPQNRSSPCIHYFTGTPDPSRSI	2656	P	3	3427		0.999986	0.0235941	59.261	49.473	59.261	-1.7959	0	0.999986	NaN	NaN	59.261	NaN	NaN
Q12769	249	Q12769	Q12769	Nuclear pore complex protein Nup160	NUP160	ASGGIFVLKLPPYDIPGMVSVVELKQSSVMQ	2658	P	2	3431		0.999875	0.0260516	95.273	72.395	95.273	0.75677	126740000	NaN	NaN	0.999875	NaN	NaN	95.273
Q12789	2014	Q12789	Q12789	General transcription factor 3C polypeptide 1	GTF3C1	CKGMMEAMLYHIMTRPGIPESSLLRHYQGVL	2662	P	4	3437		0.822647	0.0155787	44.632	44.632	44.632	0.10581	47646000	NaN	NaN	0.822647	NaN	NaN	44.632
Q12802	1231	Q12802	Q12802	A-kinase anchor protein 13	AKAP13	MRAPPSGRERSTPSLPCMVSAQDAPLPKGAD	2668	P	3	3443		0.950223	0.0144377	54.805	51.992	46.663	-1.1202	86203000	0.950223	NaN	0.855225	46.663	NaN	54.805
Q12830	1649	Q12830	Q12830	Nucleosome-remodeling factor subunit BPTF	BPTF	KESDSTQTTTPSASCPESNSVNQVEDMEIET	2669	P	3	3447		0.773223	0.000512069	52.722	51.284	52.722	1.0045	44443000	NaN	NaN	0.773223	NaN	NaN	52.722
Q12834	453	Q12834	Q12834	Cell division cycle protein 20 homolog	CDC20	ELKGHTSRVLSLTMSPDGATVASAAADETLR	2670	P	2	3448		1	0.0328489	71.692	59.309	71.692	0.18024	5116300	NaN	NaN	1	NaN	NaN	71.692
Q12849	368	Q12849	Q12849	G-rich sequence factor 1	GRSF1	PEMVFEEHEVNEDIQPMTAFESEKEIELPKE	2674	P	4	3451		0.999852	9.02287e-06	68.942	68.942	68.942	-0.68593	49980000	NaN	NaN	0.999852	NaN	NaN	68.942
Q12849	381	Q12849	Q12849	G-rich sequence factor 1	GRSF1	IQPMTAFESEKEIELPKEVPEKLPEAADFGT	2675	P	4	3451		0.639574	0.000762135	47.429	40.342	47.429	0.12035	18985000	NaN	NaN	0.639574	NaN	NaN	47.429
Q12860	283	Q12860	Q12860	Contactin-1	CNTN1	NPVPDIRWRKVLEPMPSTAEISTSGAVLKIF	2676	P	2	3454		0.976151	0.020933	89.507	76.306	89.507	2.7184	15482000	0.976151	NaN	NaN	89.507	NaN	NaN
Q12872	62	Q12872	Q12872	Splicing factor, suppressor of white-apricot homolog	SFSWAP	DDERALAQEQGQHLIPWMGDHKILIDRYDGR	2677	P	5	3456		1	6.40536e-06	88.239	82.078	88.239	-1.0333	133580000	NaN	NaN	1	NaN	NaN	88.239
Q12874	473	Q12874	Q12874	Splicing factor 3A subunit 3	SF3A3	LWAKLKLQKASERWQPDTEEEYEDSSGNVVN	2681	P	3	3458		1	0.0052222	83.614	80.516	83.614	-0.4328	33006000	1	NaN	NaN	83.614	NaN	NaN
Q12888	1164	Q12888	Q12888	Tumor suppressor p53-binding protein 1	TP53BP1	QNNIGIQTMECSLRVPETVSAATQTIKNVCE	2682	P	4	3460		0.999879	9.68072e-05	54.375	49.843	54.375	-0.54293	15867000	NaN	NaN	0.999879	NaN	NaN	54.375
Q12888	571	Q12888	Q12888	Tumor suppressor p53-binding protein 1	TP53BP1	NSKFVPAENDSILMNPAQDGEVQLSQNDDKT	2683	P	3	3460		0.533959	0.0022198	54.141	51.413	54.141	1.3407	82055000	NaN	NaN	0.533959	NaN	NaN	54.141
Q12888	966	Q12888	Q12888	Tumor suppressor p53-binding protein 1	TP53BP1	ATSDVMSESMVETHDPILGSGKGDSGAAPDV	2685	P	5	3460		0.999252	5.39301e-10	66.658	66.658	66.658	0.29589	31857000	0.999252	NaN	NaN	66.658	NaN	NaN
Q12905	42	Q12905	Q12905	Interleukin enhancer-binding factor 2	ILF2	VPHIPFDFYLCEMAFPRVKPAPDETSFSEAL	2689	P	3	3466		0.999946	0.000890017	82.077	70.766	82.077	-1.0746	960920000	0.99948	NaN	0.999946	72.22	NaN	82.077
Q12905	353	Q12905	Q12905	Interleukin enhancer-binding factor 2	ILF2	YLASEISTWDGVIVTPSEKAYEKPPEKKEGE	2690	P	3	3466		1	0.00694804	45.901	39.538	45.901	0.49712	37118000	1	NaN	NaN	45.901	NaN	NaN
Q12906	369	Q12906	Q12906	Interleukin enhancer-binding factor 3	ILF3	DYTVQIPPSTTYAITPMKRPMEEDGEEKSPS	2696	P	4	3467		0.999668	0.000712319	70.799	59.694	70.799	0.89755	53846000	NaN	NaN	0.999668	NaN	NaN	70.799
Q12906	286	Q12906	Q12906	Interleukin enhancer-binding factor 3	ILF3	ALRRVLECLASGIVMPDGSGIYDPCEKEATD	2700	P	3	3467		0.999627	0.00131866	62.19	55.614	62.19	-1.1569	9748200	0.999627	NaN	NaN	62.19	NaN	NaN
Q12906	294	Q12906	Q12906	Interleukin enhancer-binding factor 3	ILF3	LASGIVMPDGSGIYDPCEKEATDAIGHLDRQ	2701	P	3	3467		0.909417	0.0219093	42.052	40.113	42.052	0.43448	44883000	0.909417	NaN	NaN	42.052	NaN	NaN
Q12931	686	Q12931	Q12931	Heat shock protein 75 kDa, mitochondrial	TRAP1	QIYENAMIAAGLVDDPRAMVGRLNELLVKAL	2706	P	4	3473		1	4.28694e-10	124.37	124.37	124.37	0.1197	235850000	1	NaN	NaN	124.37	NaN	NaN
Q12931	303	Q12931	Q12931	Heat shock protein 75 kDa, mitochondrial	TRAP1	NGRRMNTLQAIWMMDPKDVREWQHEEFYRYV	2709	P	5	3473		1	0.0069667	48.389	46.332	48.389	-0.28816	5751900	1	NaN	NaN	48.389	NaN	NaN
Q12955	1425	Q12955	Q12955	Ankyrin-3	ANK3	GRLSFLKEPKTTKGLPQTAVCNLNITLPAHK	2717	P	3	3477		0.999906	0.0333697	49.049	44.182	49.049	1.8273	10029000	0.999906	NaN	NaN	49.049	NaN	NaN
Q12955	1035	Q12955	Q12955	Ankyrin-3	ANK3	ITCRLVKRHKLANPPPMVEGEGLASRLVEMG	2718	P	3	3477		0.949077	0.0335256	55.589	44.115	55.589	-0.9517	0	NaN	NaN	0.949077	NaN	NaN	55.589
Q12955	1065	Q12955	Q12955	Ankyrin-3	ANK3	GPAGAQFLGPVIVEIPHFGSMRGKERELIVL	2719	P	3	3477		0.997006	0.00214734	57.803	48.47	57.803	-0.33317	200730000	NaN	NaN	0.997006	NaN	NaN	57.803
Q12959	78	Q12959	Q12959	Disks large homolog 1	DLG1	NPKCIDRSKPSEPIQPVNTWEISSLPSSTVT	2720	P	4	3478		0.781691	0.000553979	40.533	36.721	40.533	-3.6691	15150000	NaN	NaN	0.781691	NaN	NaN	40.533
Q12972	157	Q12972	Q12972	Nuclear inhibitor of protein phosphatase 1;Activator of RNA decay	PPP1R8	KMGGEDDELKGLLGLPEEETELDNLTEFNTA	2721	P	3	3482		1	0.0169042	48.947	43.891	48.947	-2.8014	20045000	1	NaN	NaN	48.947	NaN	NaN
Q12996	29	Q12996	Q12996	Cleavage stimulation factor subunit 3	CSTF3	VPEKVKKAEKKLEENPYDLDAWSILIREAQN	2724	P	2	3490		1	0.0331765	60.49	45.614	60.49	-4.0719	0	NaN	NaN	1	NaN	NaN	60.49
Q13043	453	Q13043	Q13043	Serine/threonine-protein kinase 4;Serine/threonine-protein kinase 4 37kDa subunit;Serine/threonine-protein kinase 4 18kDa subunit	STK4	SWTVEDLQKRLLALDPMMEQEIEEIRQKYQS	2728	P	3	3499		1	0.000108143	91.475	77.434	74.776	1.5236	200950000	1	NaN	1	91.475	NaN	82.36
Q13045	700	Q13045	Q13045	Protein flightless-1 homolog	FLII	KGKAEITLLVQGQELPEFWEALGGEPSEIKK	2729	P	2	3500		0.99998	2.56428e-15	132.59	122.8	132.59	-2.7639	0	0.99998	NaN	NaN	132.59	NaN	NaN
Q13045	374	Q13045	Q13045	Protein flightless-1 homolog	FLII	IHFLTEIEVLDVRENPNLVMPPKPADRAAEW	2731	P	4	3500		0.671708	1.33313e-12	130.61	122.41	130.61	0.8043	71447000	0.671708	NaN	NaN	130.61	NaN	NaN
Q13057	169	Q13057	Q13057	Bifunctional coenzyme A synthase;Phosphopantetheine adenylyltransferase;Dephospho-CoA kinase	COASY	SDYGIGEVPVEPLDVPLPSTIRPASPVAGSP	2733	P	4	3502		0.971855	0.000112707	45.192	36.787	45.192	-0.20338	64737000	NaN	NaN	0.971855	NaN	NaN	45.192
Q13057	171	Q13057	Q13057	Bifunctional coenzyme A synthase;Phosphopantetheine adenylyltransferase;Dephospho-CoA kinase	COASY	YGIGEVPVEPLDVPLPSTIRPASPVAGSPKQ	2734	P	4	3502		0.971855	0.000112707	45.192	36.787	45.192	-0.20338	64737000	NaN	NaN	0.971855	NaN	NaN	45.192
Q13057	176	Q13057	Q13057	Bifunctional coenzyme A synthase;Phosphopantetheine adenylyltransferase;Dephospho-CoA kinase	COASY	VPVEPLDVPLPSTIRPASPVAGSPKQPVRGY	2735	P	4	3502		0.971855	0.000112707	45.192	36.787	45.192	-0.20338	64737000	NaN	NaN	0.971855	NaN	NaN	45.192
Q13057	179	Q13057	Q13057	Bifunctional coenzyme A synthase;Phosphopantetheine adenylyltransferase;Dephospho-CoA kinase	COASY	EPLDVPLPSTIRPASPVAGSPKQPVRGYYRG	2736	P	4	3502		0.962441	0.000112707	45.192	36.787	45.192	-0.20338	64737000	NaN	NaN	0.962441	NaN	NaN	45.192
Q13057	184	Q13057	Q13057	Bifunctional coenzyme A synthase;Phosphopantetheine adenylyltransferase;Dephospho-CoA kinase	COASY	PLPSTIRPASPVAGSPKQPVRGYYRGAVGGT	2737	P	4	3502		0.938026	0.000112707	45.192	36.787	45.192	-0.20338	64737000	NaN	NaN	0.938026	NaN	NaN	45.192
Q13084	197	Q13084	Q13084	39S ribosomal protein L28, mitochondrial	MRPL28	ERRAAIYDKYKEFAIPEEEAEWVGLTLEEAI	2738	P	3	3503		1	0.0310043	53.073	47.699	53.073	-3.7642	0	1	NaN	NaN	53.073	NaN	NaN
Q13085	805	Q13085	Q13085	Acetyl-CoA carboxylase 1;Biotin carboxylase	ACACA	TLTAVESGCIHYVKRPGAALDPGCVLAKMQL	2743	P	3	3504		1	0.0149081	43.696	33.013	43.696	1.0219	99333000	NaN	NaN	1	NaN	NaN	43.696
Q13085	811	Q13085	Q13085	Acetyl-CoA carboxylase 1;Biotin carboxylase	ACACA	SGCIHYVKRPGAALDPGCVLAKMQLDNPSKV	2744	P	3	3504		1	0.0149081	43.696	33.013	43.696	1.0219	99333000	NaN	NaN	1	NaN	NaN	43.696
Q13085	823	Q13085	Q13085	Acetyl-CoA carboxylase 1;Biotin carboxylase	ACACA	ALDPGCVLAKMQLDNPSKVQQAELHTGSLPR	2745	P	3	3504		1	0.0149081	43.696	33.013	43.696	1.0219	99333000	NaN	NaN	1	NaN	NaN	43.696
Q13085	345	Q13085	Q13085	Acetyl-CoA carboxylase 1;Biotin carboxylase	ACACA	FPNLFRQVQAEVPGSPIFVMRLAKQSRHLEV	2746	P	2	3504		0.844195	0.00958295	113.63	100.67	113.63	1.9421	23551000	0.844195	NaN	NaN	113.63	NaN	NaN
Q13085	1576	Q13085	Q13085	Acetyl-CoA carboxylase 1;Biotin carboxylase	ACACA	YGDKQGPLHGMLINTPYVTKDLLQSKRFQAQ	2747	P	4	3504		0.848204	0.000587823	57.299	57.299	57.299	-1.1778	60394000	0.848204	NaN	NaN	57.299	NaN	NaN
Q13085	751	Q13085	Q13085	Acetyl-CoA carboxylase 1;Biotin carboxylase	ACACA	ITIGNKTCVFEKENDPSVMRSPSAGKLIQYI	2748	P	2	3504		1	0.0151593	84.506	71.739	84.506	-1.957	0	1	NaN	NaN	84.506	NaN	NaN
Q13123	264	Q13123	Q13123	Protein Red	IK	DTDIPTTLIRSKADCPTMEAQTTLTTNDIVI	2753	P	3	3513		1	0.00178135	83.198	81.363	83.198	0.77939	64711000	1	NaN	1	83.106	NaN	83.198
Q13123	393	Q13123	Q13123	Protein Red	IK	KKRHSYFEKPKVDDEPMDVDKGPGSTKELIK	2755	P	3	3513		0.999998	0.00527624	96.666	85.811	96.666	-0.043106	0	NaN	NaN	0.999998	NaN	NaN	96.666
Q13185	63	Q13185	Q13185	Chromobox protein homolog 3	CBX3	FLKWKGFTDADNTWEPEENLDCPELIEAFLN	2763	P	3	3530		1	0.00464272	54.675	52.564	40.328	-4.3038	47292000	1	NaN	1	54.675	NaN	48.213
Q13185	70	Q13185	Q13185	Chromobox protein homolog 3	CBX3	TDADNTWEPEENLDCPELIEAFLNSQKAGKE	2764	P	3	3530		1	0.00464272	50.583	45.963	40.328	-4.3038	38945000	1	NaN	1	50.583	NaN	48.213
Q13200	827	Q13200	Q13200	26S proteasome non-ATPase regulatory subunit 2	PSMD2	GKSHYVLYGLVAAMQPRMLVTFDEELRPLPV	2772	P	2	3534		1	0.00728958	139.86	124.71	139.86	2.9303	10951000	NaN	NaN	1	NaN	NaN	139.86
Q13263	576	Q13263	Q13263	Transcription intermediary factor 1-beta	TRIM28	AIGAPPTATEGPETKPVLMALAEGPGAEGPR	2774	P	4	3547		0.932022	4.97884e-09	70.616	66.3	70.616	-0.4567	144460000	0.932022	0	NaN	70.616	NaN	NaN
Q13263	216	Q13263	Q13263	Transcription intermediary factor 1-beta	TRIM28	RDGERTVYCNVHKHEPLVLFCESCDTLTCRD	2780	P	5	3547		1	0.0120194	52.79	51.108	41.482	-0.57208	98686000	1	NaN	1	52.79	NaN	41.482
Q13263	734	Q13263	Q13263	Transcription intermediary factor 1-beta	TRIM28	PLHQLATDSTFSLDQPGGTLDLTLIRARLQE	2796	P	5	3547		0.684867	6.7454e-07	59.158	51.541	59.158	0.20506	193710000	0.684867	0	0	59.158	NaN	NaN
Q13283	27	Q13283	Q13283	Ras GTPase-activating protein-binding protein 1	G3BP1	GREFVRQYYTLLNQAPDMLHRFYGKNSSYVH	2797	P	4	3550		1	4.79284e-06	92.01	85.506	92.01	0.11491	92185000	NaN	NaN	1	NaN	NaN	92.01
Q13308	870	Q13308	Q13308	Inactive tyrosine-protein kinase 7	PTK7	HANVVRLLGLCREAEPHYMVLEYVDLGDLKQ	2798	P	4	3554		1	9.09731e-05	77.847	74.966	77.847	0.086144	157160000	1	NaN	NaN	77.847	NaN	NaN
Q13330;Q9BTC8	236;219	Q13330;Q9BTC8	Q13330	Metastasis-associated protein MTA1;Metastasis-associated protein MTA3	MTA1;MTA3	GTFARALDCSSSVRQPSLHMSAAAASRDITL	2802	P	4	3560;7456		1	0.00245112	63.165	45.571	63.165	1.2391	101750000	NaN	NaN	1	NaN	NaN	63.165
Q13352	34	Q13352	Q13352	Centromere protein R	ITGB3BP	DPSKITRKKSVITYSPTTGTCQMSLFASPTS	2804	P	3	3563		0.999512	0.00205046	55.063	48.559	55.063	2.0796	13636000	NaN	NaN	0.999512	NaN	NaN	55.063
Q13356	504	Q13356	Q13356	Peptidyl-prolyl cis-trans isomerase-like 2	PPIL2	TKRAAEEEPSTSATVPMSKKKPSRGFGDFSS	2805	P	2	3564		0.999997	0.0356487	91.858	75.187	91.858	0.087718	46656000	NaN	NaN	0.999997	NaN	NaN	91.858
Q13409	440	Q13409	Q13409	Cytoplasmic dynein 1 intermediate chain 2	DYNC1I2	VHKQSKAVAVTSMSFPVGDVNNFVVGSEEGS	2806	P	3	3576		1	0.00579074	42.828	37.453	42.59	2.173	30306000	NaN	NaN	1	NaN	NaN	42.828
Q13423	135	Q13423	Q13423	NAD(P) transhydrogenase, mitochondrial	NNT	LASDLVVKVRAPMVNPTLGVHEADLLKTSGT	2813	P	5	3580		0.565983	1.04411e-08	118.2	114.13	62.547	1.6253	92898000	0.565983	0	0.544234	104.98	NaN	118.2
Q13428	624	Q13428	Q13428	Treacle protein	TCOF1	ESSEESSDSADSEEAPAAMTAAQAKPALKIP	2814	P	4	3585		0.53508	1.05045e-07	76.976	76.976	76.976	0.17214	60688000	0.53508	NaN	NaN	76.976	NaN	NaN
Q13451	14	Q13451	Q13451	Peptidyl-prolyl cis-trans isomerase FKBP5;Peptidyl-prolyl cis-trans isomerase FKBP5, N-terminally processed	FKBP5	__MTTDEGAKNNEESPTATVAEQGEDITSKK	2831	P	3	3595		1	0.000317704	51.586	45.556	51.586	0.068341	12094000	NaN	NaN	1	NaN	NaN	51.586
Q13459	1324	Q13459	Q13459	Unconventional myosin-IXb	MYO9B	AVELWRGKKLVAAASPSAMLSQSLDLSDRHR	2833	P	3	3597		1	0.00902403	62.966	54.576	62.966	-1.4051	17194000	NaN	NaN	1	NaN	NaN	62.966
Q13459	1843	Q13459	Q13459	Unconventional myosin-IXb	MYO9B	HLVKVALLEDVNRMSPGALAIIFAPCLLRCP	2834	P	3	3597		0.999998	0.0226627	59.709	52.117	59.709	0.24388	0	0.999998	NaN	NaN	59.709	NaN	NaN
Q13526	149	Q13526	Q13526	Peptidyl-prolyl cis-trans isomerase NIMA-interacting 1	PIN1	FEDASFALRTGEMSGPVFTDSGIHIILRTE_	2847	P	2	3615		1	0.00577242	69.108	56.942	69.108	4.2409	18363000	1	NaN	NaN	69.108	NaN	NaN
Q13547	29	Q13547	Q13547	Histone deacetylase 1	HDAC1	YYDGDVGNYYYGQGHPMKPHRIRMTHNLLLN	2857	P	3	3621		1	0.0236941	47.752	47.752	47.752	-1.8125	32768000	1	NaN	NaN	47.752	NaN	NaN
Q13547	243	Q13547	Q13547	Histone deacetylase 1	HDAC1	LRDGIDDESYEAIFKPVMSKVMEMFQPSAVV	2859	P	3	3621		0.999998	0.000314185	92.198	86.823	92.198	-2.5733	789710000	0.999998	NaN	0.999998	92.198	NaN	75.71
Q13564	330	Q13564	Q13564	NEDD8-activating enzyme E1 regulatory subunit	NAE1	VAKEGQGNLPVRGTIPDMIADSGKYIKLQNV	2861	P	3	3627		0.997579	0.0247476	59.814	50.882	59.814	-1.8406	112710000	NaN	NaN	0.997579	NaN	NaN	59.814
Q13608	566	Q13608	Q13608	Peroxisome assembly factor 2	PEX6	LRHLLLNEDPLNSCPPLMVVATTSRAQDLPA	2869	P	3	3639		0.819245	5.35115e-05	83.602	75.108	73.981	0.70175	122370000	0.800087	NaN	0.819245	83.602	NaN	73.981
Q13613	18	Q13613	Q13613	Myotubularin-related protein 1	MTMR1	RPAAAAAAGCEGGGGPNPGPAGGRRPPRAAG	2871	P	3	3641		0.810939	0.00300399	40.428	37.33	40.428	1.2815	22114000	0.810939	0	0	40.428	NaN	NaN
Q13613	610	Q13613	Q13613	Myotubularin-related protein 1	MTMR1	ELWVNYYVRWNPRMRPQMPIHQNLKELLAVR	2872	P	5	3641		0.910968	0.0172516	59.434	59.434	59.434	0.21949	236340000	0.910968	NaN	0.84485	59.434	NaN	49.606
Q13616	687	Q13616	Q13616	Cullin-1	CUL1	YLGYKNKKLRVNINVPMKTEQKQEQETTHKN	2873	P	4	3644		1	2.37117e-12	158.65	145.85	103.41	0.247	103720000	NaN	NaN	1	NaN	NaN	158.65
Q13823	106	Q13823	Q13823	Nucleolar GTP-binding protein 2	GNL2	SLQKFQEEMDTVMKDPYKVVMKQSKLPMSLL	2883	P	3	3670		1	0.0228703	50.079	46.691	50.079	-0.78171	74740000	1	NaN	NaN	50.079	NaN	NaN
Q13823	153	Q13823	Q13823	Nucleolar GTP-binding protein 2	GNL2	ESFETTFGPKSQRKRPNLFASDMQSLIENAE	2884	P	3	3670		1	0.00560326	47.237	44.796	47.237	-1.4941	19094000	1	NaN	NaN	47.237	NaN	NaN
Q13867	260	Q13867	Q13867	Bleomycin hydrolase	BLMH	IGPITPLEFYREHVKPLFNMEDKICLVNDPR	2888	P	5	3674		0.998884	0.019126	41.76	23.041	41.76	0.045131	50276000	NaN	NaN	0.998884	NaN	NaN	41.76
Q13885;Q9BVA1	160;160	Q13885;Q9BVA1	Q9BVA1	Tubulin beta-2A chain;Tubulin beta-2B chain	TUBB2A;TUBB2B	SGMGTLLISKIREEYPDRIMNTFSVMPSPKV	2890	P	4	3678;7544		0.995218	0.000566754	76.027	8.1607	76.027	-0.50506	198390000	0.995218	NaN	0.943029	76.027	NaN	57.496
Q13885	182	Q13885	Q13885	Tubulin beta-2A chain	TUBB2A	FSVMPSPKVSDTVVEPYNATLSVHQLVENTD	2891	P	3	3678		1	1.25296e-06	50.942	44.289	50.942	-3.1922	58632000	1	NaN	1	43.703	NaN	50.942
Q13888;Q6P1K8	269;269	Q13888;Q6P1K8	Q13888	General transcription factor IIH subunit 2;General transcription factor IIH subunit 2-like protein	GTF2H2;GTF2H2C	FPQHTIASLSDQDAKPSFSMAHLDGNTEPGL	2892	P	3	3680;4774		0.98558	0.0142863	42.106	35.602	42.106	2.5584	14122000	NaN	NaN	0.98558	NaN	NaN	42.106
Q14008	1503	Q14008	Q14008	Cytoskeleton-associated protein 5	CKAP5	LDEIENDNGTVRCEMPELVQHKLDDIFEPVL	2899	P	5	3692		1	0.000109794	89.039	83.773	89.039	0.84529	14080000	NaN	NaN	1	NaN	NaN	89.039
Q14012	182	Q14012	Q14012	Calcium/calmodulin-dependent protein kinase type 1	CAMK1	KMEDPGSVLSTACGTPGYVAPEVLAQKPYSK	2900	P	3	3694		0.974624	0.00856919	44.3	41.761	44.3	1.0336	14889000	0.974624	NaN	NaN	44.3	NaN	NaN
Q14137	107	Q14137	Q14137	Ribosome biogenesis protein BOP1	BOP1	SGIKKTTEEQVQASTPCPRTEMASARIGDEY	2909	P	2	3708		0.895329	0.0109045	107.06	99.327	107.06	0.99026	82967000	0.895329	NaN	NaN	107.06	NaN	NaN
Q14139	147	Q14139	Q14139	Ubiquitin conjugation factor E4 A	UBE4A	SNVEQALFARLLLQDPGNHLINMTSSTTLNL	2912	P	3	3709		1	0.000943657	63.573	52.572	63.573	0.12826	15324000	1	NaN	NaN	63.573	NaN	NaN
Q14152	987	Q14152	Q14152	Eukaryotic translation initiation factor 3 subunit A	EIF3A	PEEDRFSRRGADDDRPSWRNTDDDRPPRRIA	2915	P	3	3717		1	0.0331581	101.35	78.788	101.35	-1.1414	11640000	NaN	NaN	1	NaN	NaN	101.35
Q14152	1139	Q14152	Q14152	Eukaryotic translation initiation factor 3 subunit A	EIF3A	DDDRIPRRGAEDDRGPWRNMDDDRLSRRADD	2916	P	3	3717		1	0.0113946	114.71	74.261	99.215	-0.62372	15244000	1	NaN	1	99.215	NaN	114.71
Q14152	509	Q14152	Q14152	Eukaryotic translation initiation factor 3 subunit A	EIF3A	GSDLNYATREDAPIGPHLQSMPSEQIRNQLT	2917	P	4	3717		0.736927	0.00340812	43.622	41.565	43.622	0.39541	32437000	NaN	0	0.736927	NaN	NaN	43.622
Q14157	426	Q14157	Q14157	Ubiquitin-associated protein 2-like	UBAP2L	DSAVHSPFTKRQAFTPSSTMMEVFLQEKSPA	2919	P	3	3721		1	0.000167596	100.19	80.583	63.145	4.2418	15453000	1	NaN	1	100.19	NaN	63.145
Q14161	618	Q14161	Q14161	ARF GTPase-activating protein GIT2	GIT2	GMGSSRKGRQRSMVWPGDGLVPDTAEPHVAP	2934	P	3	3724		0.970006	0.00809554	48.947	43.517	48.947	-3.9795	0	NaN	NaN	0.970006	NaN	NaN	48.947
Q14166	566	Q14166	Q14166	Tubulin--tyrosine ligase-like protein 12	TTLL12	IFRAFTELFQVACAKPPPLGLCDYPSSRAMY	2936	P	3	3726		0.7999	8.73093e-05	88.168	81.805	88.168	-0.80114	10270000	0.7999	NaN	NaN	88.168	NaN	NaN
Q14185	1087	Q14185	Q14185	Dedicator of cytokinesis protein 1	DOCK1	NLGQHKIKFIPEMVGPILEMTLIPETELRKA	2940	P	3	3729		0.548543	0.00555327	50.883	50.883	50.883	0.70414	3963700	NaN	NaN	0.548543	NaN	NaN	50.883
Q14203	806	Q14203	Q14203	Dynactin subunit 1	DCTN1	CSDIRQFCKKIRRRMPGTDAPGIPAALAFGP	2943	P	4	3738		0.762603	4.01951e-05	112.99	99.101	93.295	-0.44363	157460000	0.762603	NaN	0.723693	93.295	NaN	112.99
Q14204	2613	Q14204	Q14204	Cytoplasmic dynein 1 heavy chain 1	DYNC1H1	GSGKTMTLFSALRALPDMEVVGLNFSSATTP	2945	P	5	3739		1	5.54421e-05	95.878	90.923	95.878	0.47761	56609000	NaN	NaN	1	NaN	NaN	95.878
Q14204	2411	Q14204	Q14204	Cytoplasmic dynein 1 heavy chain 1	DYNC1H1	RRRKGKEDEGEEAASPMLQIQRDAATIMQPY	2947	P	2	3739		1	5.4069e-24	196.84	190.81	196.84	-0.46467	177830000	1	NaN	1	196.84	NaN	161.76
Q14204	2768	Q14204	Q14204	Cytoplasmic dynein 1 heavy chain 1	DYNC1H1	RAMLRLIPSLRTYAEPLTAAMVEFYTMSQER	2954	P	2	3739		1	0.00146591	98.531	78.068	70.332	-0.13667	60241000	1	NaN	NaN	98.531	NaN	NaN
Q14204	2590	Q14204	Q14204	Cytoplasmic dynein 1 heavy chain 1	DYNC1H1	VRHEALLYTWLAEHKPLVLCGPPGSGKTMTL	2957	P	5	3739		0.80173	4.60216e-11	67.814	58.423	67.814	0.81199	63745000	0.80173	NaN	NaN	67.814	NaN	NaN
Q14204	2596	Q14204	Q14204	Cytoplasmic dynein 1 heavy chain 1	DYNC1H1	LYTWLAEHKPLVLCGPPGSGKTMTLFSALRA	2958	P	5	3739		0.801223	4.60216e-11	67.814	58.423	67.814	0.81199	63745000	0.801223	NaN	NaN	67.814	NaN	NaN
Q14241	429	Q14241	Q14241	Transcription elongation factor B polypeptide 3	TCEB3	LPKVEETDMEDEFEQPTMSFESYLSYDQPRK	2964	P	3	3743		0.999996	0.00120302	55.358	55.358	55.358	-2.092	7948700	NaN	NaN	0.999996	NaN	NaN	55.358
Q14247	402	Q14247	Q14247	Src substrate cortactin	CTTN	ARRKLEEQARAKTQTPPVSPAPQPTEERLPS	2966	P	3	3745		0.725972	0.00365348	50.492	48.326	50.492	-0.71299	307480000	0.725972	NaN	NaN	50.492	NaN	NaN
Q14247	403	Q14247	Q14247	Src substrate cortactin	CTTN	RRKLEEQARAKTQTPPVSPAPQPTEERLPSS	2967	P	3	3745		0.696578	0.00365348	50.492	48.326	50.492	-0.71299	307480000	0.696578	NaN	NaN	50.492	NaN	NaN
Q14247	406	Q14247	Q14247	Src substrate cortactin	CTTN	LEEQARAKTQTPPVSPAPQPTEERLPSSPVY	2968	P	3	3745		0.987995	0.000266857	62.052	56.45	58.712	-1.976	946160000	0.973704	NaN	0.987995	59.598	NaN	62.052
Q14247	408	Q14247	Q14247	Src substrate cortactin	CTTN	EQARAKTQTPPVSPAPQPTEERLPSSPVYED	2969	P	3	3745		0.989075	0.000266857	62.052	56.45	58.712	-1.976	946160000	0.973704	NaN	0.989075	59.598	NaN	62.052
Q14247	410	Q14247	Q14247	Src substrate cortactin	CTTN	ARAKTQTPPVSPAPQPTEERLPSSPVYEDAA	2970	P	3	3745		0.989075	0.000266857	62.052	56.45	58.712	-1.976	946160000	0.973704	NaN	0.989075	59.598	NaN	62.052
Q14247	416	Q14247	Q14247	Src substrate cortactin	CTTN	TPPVSPAPQPTEERLPSSPVYEDAASFKAEL	2971	P	3	3745		0.989075	0.000266857	62.052	56.45	58.712	-1.976	946160000	0.97643	NaN	0.989075	59.598	NaN	62.052
Q14247	419	Q14247	Q14247	Src substrate cortactin	CTTN	VSPAPQPTEERLPSSPVYEDAASFKAELSYR	2972	P	3	3745		0.976912	0.000266857	62.052	56.45	58.712	-1.976	898490000	0.939996	NaN	0.976912	59.598	NaN	62.052
Q14353	40	Q14353	Q14353	Guanidinoacetate N-methyltransferase	GAMT	AAYDAADTHLRILGKPVMERWETPYMHALAA	2975	P	4	3757		1	0.000137267	74.748	68.099	54.605	-0.29823	107410000	1	NaN	0.81765	54.605	NaN	74.748
Q14353	48	Q14353	Q14353	Guanidinoacetate N-methyltransferase	GAMT	HLRILGKPVMERWETPYMHALAAAASSKGGR	2976	P	4	3757		1	0.0192208	54.605	54.605	54.605	-0.29823	33089000	1	NaN	NaN	54.605	NaN	NaN
Q14498	516	Q14498	Q14498	RNA-binding protein 39	RBM39	ITAAYVPLPTYHNLFPDSMTATQLLVPSRR_	2982	P	3	3768		0.982641	5.90088e-05	82.089	82.089	82.089	-0.078122	105600000	0	0	0.982641	NaN	NaN	82.089
Q14527	905	Q14527	Q14527	Helicase-like transcription factor	HLTF	RVESIQCFQNTEAGSPTIMLLSLKAGGVGLN	2984	P	3	3770		1	0.0229565	61.801	55.078	61.801	2.523	74245000	1	NaN	1	61.801	NaN	55.049
Q14534	415	Q14534	Q14534	Squalene monooxygenase	SQLE	KRGVLLLGDAYNMRHPLTGGGMTVAFKDIKL	2985	P	4	3771		1	9.46804e-05	73.341	66.836	73.341	-0.22237	44115000	NaN	NaN	1	NaN	NaN	73.341
Q14558	231	Q14558	Q14558	Phosphoribosyl pyrophosphate synthase-associated protein 1	PRPSAP1	PPMVKNATVHPGLELPLMMAKEKPPITVVGD	2986	P	2	3774		0.999882	0.000614424	100.04	100.04	100.04	-0.21432	15877000	NaN	NaN	0.999882	NaN	NaN	100.04
Q14566	356	Q14566	Q14566	DNA replication licensing factor MCM6	MCM6	SQDKNLYHNLCTSLFPTIHGNDEVKRGVLLM	2991	P	4	3776		1	0.00228647	56.9	52.738	44.089	1.0878	66836000	1	NaN	NaN	56.9	NaN	NaN
Q14573	1361	Q14573	Q14573	Inositol 1,4,5-trisphosphate receptor type 3	ITPR3	LDMMKAARDGVEDHSPLMYHISLVDLLAACA	2994	P	4	3778		1	0.000381216	63.63	57.267	63.63	0.36022	25797000	1	NaN	NaN	63.63	NaN	NaN
Q14643	953	Q14643	Q14643	Inositol 1,4,5-trisphosphate receptor type 1	ITPR1	GELMTQVVLRGGGFLPMTPMAAAPEGNVKQA	2998	P	2	3789		1	0.00122472	99.531	99.531	99.531	0.089904	30324000	1	NaN	NaN	99.531	NaN	NaN
Q14643	956	Q14643	Q14643	Inositol 1,4,5-trisphosphate receptor type 1	ITPR1	MTQVVLRGGGFLPMTPMAAAPEGNVKQAEPE	2999	P	2	3789		0.999811	0.00122472	99.531	99.531	99.531	0.089904	30324000	0.999811	NaN	NaN	99.531	NaN	NaN
Q14653	248	Q14653	Q14653	Interferon regulatory factor 3	IRF3	VGDRTLPGWPVTLPDPGMSLTDRGVMSYVRH	3001	P	3	3791		0.990728	0.000900351	66.853	66.853	66.853	1.207	68936000	0.990728	NaN	0.803276	66.853	NaN	59.429
Q14671	1108	Q14671	Q14671	Pumilio homolog 1	PUM1	ERAVLIDEVCTMNDGPHSALYTMMKDQYANY	3003	P	3	3795		1	0.000954245	61.181	58.248	61.181	-0.46121	26715000	1	NaN	NaN	61.181	NaN	NaN
Q14684	494	Q14684	Q14684	Ribosomal RNA processing protein 1 homolog B	RRP1B	SPRAHREMLESAVLPPEDMSQSGPSGSHPQG	3012	P	3	3804		0.765849	0.000127345	81.888	75.165	81.888	1.5661	20388000	0	0	0.765849	NaN	NaN	81.888
Q14690	1005	Q14690	Q14690	Protein RRP5 homolog	PDCD11	LLLAVEGPAAKRTMRPTQKDSETVDEDEEVD	3026	P	4	3808		0.999975	0.000648064	61.732	51.402	61.732	1.5123	49764000	0.999974	NaN	0.999975	61.415	NaN	61.732
Q14692	267	Q14692	Q14692	Ribosome biogenesis protein BMS1 homolog	BMS1	SHPYILADRMEDLTNPEDIRTNIKCDRKVSL	3028	P	4	3810		0.976327	0.000987289	59.893	49.655	59.893	-1.1514	72784000	NaN	NaN	0.976327	NaN	NaN	59.893
Q14692	414	Q14692	Q14692	Ribosome biogenesis protein BMS1 homolog	BMS1	KPLGSEDIDNQGLMMPKEEKQMDLNTGRMRR	3030	P	2	3810		0.999989	0.0323402	61.353	51.666	61.353	-0.5455	2971900	0.999989	NaN	NaN	61.353	NaN	NaN
Q14692	300	Q14692	Q14692	Ribosome biogenesis protein BMS1 homolog	BMS1	YLRGAHLKNKSQIHMPGVGDFAVSDISFLPD	3031	P	3	3810		0.999919	0.00076709	51.566	40.566	51.566	-0.26513	72703000	0.999367	NaN	0.999919	43.15	NaN	51.566
Q14696	124	Q14696	Q14696	LDLR chaperone MESD	MESDC2	KKGKTLMMFVTVSGSPTEKETEEITSLWQGS	3033	P	4	3813		1	1.26013e-07	67.553	60.89	67.553	-3.2096	45295000	NaN	NaN	1	NaN	NaN	67.553
Q14839	728	Q14839	Q14839	Chromodomain-helicase-DNA-binding protein 4	CHD4	ERQPEYLDATGGTLHPYQMEGLNWLRFSWAQ	3055	P	3	3829		0.999871	0.0275911	42.806	33.179	42.806	-1.4169	27217000	0.999871	NaN	NaN	42.806	NaN	NaN
Q14839	1598	Q14839	Q14839	Chromodomain-helicase-DNA-binding protein 4	CHD4	VKSTAPETAIECTQAPAPASEDEKVVVEPPE	3056	P	3	3829		0.984091	0.00428695	57.248	53.445	57.248	0.086448	98831000	0.984091	NaN	NaN	57.248	NaN	NaN
Q14839	1519	Q14839	Q14839	Chromodomain-helicase-DNA-binding protein 4	CHD4	KKVQEFEHVNGRWSMPELAEVEENKKMSQPG	3057	P	3	3829		1	0.0272624	41.499	27.753	41.499	-0.65824	0	1	NaN	NaN	41.499	NaN	NaN
Q14865	820	Q14865	Q14865	AT-rich interactive domain-containing protein 5B	ARID5B	EIQEGKDKLLEKRALPHSHMPSFLADFYSSP	3059	P	6	3832		0.536829	7.7692e-05	70.345	65.656	70.345	0.014575	17515000	NaN	NaN	0.536829	NaN	NaN	70.345
Q14865	825	Q14865	Q14865	AT-rich interactive domain-containing protein 5B	ARID5B	KDKLLEKRALPHSHMPSFLADFYSSPHLHSL	3060	P	5	3832		0.533787	0.000668548	62.781	56.417	62.781	-0.37511	56226000	NaN	NaN	0.533787	NaN	NaN	62.781
Q14934	446	Q14934	Q14934	Nuclear factor of activated T-cells, cytoplasmic 4	NFATC4	AHYETEGSRGAVKAAPGGHPVVKLLGYSEKP	3062	P	4	3835		0.500011	0.0292389	43.612	28.163	43.612	-2.3664	60872000	NaN	NaN	0.500011	NaN	NaN	43.612
Q14934	450	Q14934	Q14934	Nuclear factor of activated T-cells, cytoplasmic 4	NFATC4	TEGSRGAVKAAPGGHPVVKLLGYSEKPLTLQ	3063	P	4	3835		0.500011	0.0292389	43.612	28.163	43.612	-2.3664	60872000	NaN	NaN	0.500011	NaN	NaN	43.612
Q14934	461	Q14934	Q14934	Nuclear factor of activated T-cells, cytoplasmic 4	NFATC4	PGGHPVVKLLGYSEKPLTLQMFIGTADERNL	3064	P	4	3835		0.999978	0.0292389	43.612	28.163	43.612	-2.3664	60872000	NaN	NaN	0.999978	NaN	NaN	43.612
Q14966	1872	Q14966	Q14966	Zinc finger protein 638	ZNF638	RIGKTLPSEKAVVTEPAKGEEAFQMSEVDEE	3065	P	3	3838		1	0.00180594	81.406	76.451	81.406	0.17436	5986300	1	NaN	NaN	81.406	NaN	NaN
Q14966	1829	Q14966	Q14966	Zinc finger protein 638	ZNF638	VDTKKTKLESLSQVGPVNENVMEEDLKTMIE	3066	P	3	3838		1	0.00363078	56.468	49.892	56.468	0.13979	35761000	1	NaN	NaN	56.468	NaN	NaN
Q14974	163	Q14974	Q14974	Importin subunit beta-1	KPNB1	ESTLEAIGYICQDIDPEQLQDKSNEILTAII	3069	P	3	3839		1	0.000825945	70.438	66.122	45.069	0.86749	110280000	1	NaN	1	70.438	NaN	45.069
Q14974	841	Q14974	Q14974	Importin subunit beta-1	KPNB1	CTAFGKDVLKLVEARPMIHELLTEGRRSKTN	3071	P	4	3839		1	0.0137217	59.728	54.018	59.728	0.20846	2078000000	NaN	NaN	1	NaN	NaN	59.728
Q14980	157	Q14980	Q14980	Nuclear mitotic apparatus protein 1	NUMA1	NLNEDLENFLQKAPVPSTCSSTFPEELSPPS	3072	P	3	3841		0.887341	0.00692545	50.539	46.511	50.539	-0.8897	39018000	0.887341	NaN	NaN	50.539	NaN	NaN
Q14980	1734	Q14980	Q14980	Nuclear mitotic apparatus protein 1	NUMA1	DLSIDSLDLSCEEGTPLSITSKLPRTQPDGT	3074	P	3	3841		0.999749	0.000811839	65.753	60.386	65.753	3.4012	12982000	0.999749	NaN	NaN	65.753	NaN	NaN
Q14CZ7	630	Q14CZ7	Q14CZ7	FAST kinase domain-containing protein 3	FASTKD3	KQRHLQLLGYQVVQIPYHEIGMLKSRRELVE	3083	P	4	3853		1	0.000536858	65.521	58.945	65.521	0.025509	110810000	1	NaN	NaN	65.521	NaN	NaN
Q15014	218	Q15014	Q15014	Mortality factor 4-like protein 2	MORF4L2	ERPQYAEILLAHPDAPMSQVYGAPHLLRLFV	3087	P	4	3863		0.805247	4.43793e-05	66.793	62.032	66.793	-0.18624	34701000	NaN	NaN	0.805247	NaN	NaN	66.793
Q15029	53	Q15029	Q15029	116 kDa U5 small nuclear ribonucleoprotein component	EFTUD2	DDDDDDDVGDHDDDHPGMEVVLHEDKKYYPT	3095	P	5	3872		1	1.07963e-07	73.492	73.492	73.492	-0.35556	104610000	1	NaN	NaN	73.492	NaN	NaN
Q15029	956	Q15029	Q15029	116 kDa U5 small nuclear ribonucleoprotein component	EFTUD2	KGLSEDVSISKFFDDPMLLELAKQDVVLNYP	3096	P	3	3872		1	0.00197764	80.522	80.522	70.917	0.13694	145960000	NaN	NaN	1	NaN	NaN	80.522
Q15029	473	Q15029	Q15029	116 kDa U5 small nuclear ribonucleoprotein component	EFTUD2	DSDLGEAMSDCDPDGPLMCHTTKMYSTDDGV	3097	P	4	3872		0.71027	0.0216515	52.237	52.237	52.237	-0.40143	21545000	NaN	NaN	0.71027	NaN	NaN	52.237
Q15046	208	Q15046	Q15046	Lysine--tRNA ligase	KARS	KGELSIIPYEITLLSPCLHMLPHLHFGLKDK	3102	P	4	3883		0.956324	0.000234888	90.37	74.607	90.37	-0.58864	139730000	0.956324	NaN	0.521871	90.37	NaN	60.728
Q15046	471	Q15046	Q15046	Lysine--tRNA ligase	KARS	CINPTFICDHPQIMSPLAKWHRSKEGLTERF	3105	P	3	3883		0.851528	0.00158206	53.089	43.206	53.089	-1.7052	8243000	0	NaN	0.851528	NaN	NaN	53.089
Q15054	428	Q15054	Q15054	DNA polymerase delta subunit 3	POLD3	SEEELNMKTSSVHRPPAMTVKKEPREERKGP	3111	P	3	3889		0.796726	0.00702829	153.54	114.53	98.582	0.18604	102360000	0.796726	0	NaN	153.54	NaN	NaN
Q15056	189	Q15056	Q15056	Eukaryotic translation initiation factor 4H	EIF4H	RRTGPPMGSRFRDGPPLRGSNMDFREPTEEE	3112	P	4	3890		0.951219	0.0125156	55.206	49.046	55.206	0.70096	22903000	NaN	NaN	0.951219	NaN	NaN	55.206
Q15059	488	Q15059	Q15059	Bromodomain-containing protein 3	BRD3	VHEQLAALSQAPVNKPKKKKEKKEKEKKKKD	3114	P	4	3893		0.965219	0.000504016	83.253	79.285	83.253	0.31018	41607000	0.792475	NaN	0.965219	46.663	NaN	83.253
Q15059	416	Q15059	Q15059	Bromodomain-containing protein 3	BRD3	ARKLQDVFEMRFAKMPDEPVEAPALPAPAAP	3115	P	2	3893		0.999948	1.14101e-05	100.11	100.11	90.707	-2.4547	101920000	0.999948	NaN	0.989207	100.11	NaN	89.507
Q15059	431	Q15059	Q15059	Bromodomain-containing protein 3	BRD3	PDEPVEAPALPAPAAPMVSKGAESSRSSEES	3116	P	2	3893		0.95559	1.14101e-05	100.11	100.11	100.11	-0.037045	127280000	0.95559	NaN	0.93891	100.11	NaN	89.507
Q15119	312	Q15119	Q15119	[Pyruvate dehydrogenase (acetyl-transferring)] kinase isozyme 2, mitochondrial	PDK2	LRKIERLFSYMYSTAPTPQPGTGGTPLAGFG	3123	P	3	3903		0.925028	0.00378365	44.615	39.61	44.615	0.35726	49953000	0.925028	NaN	NaN	44.615	NaN	NaN
Q15154	198	Q15154	Q15154	Pericentriolar material 1 protein	PCM1	LLQNCQVSEEDGRGEPAMESSQIVSRLVQIR	3128	P	4	3912		1	2.56822e-07	79.829	78.426	79.829	0.57152	18919000	NaN	NaN	1	NaN	NaN	79.829
Q15155;Q5JPE7;P69849	777;777;777	Q15155;Q5JPE7	Q5JPE7	Nodal modulator 1;Nodal modulator 2;Nodal modulator 3	NOMO1;NOMO2;NOMO3	KITVTPSSKELLFYPPSMEAVVSGESCPGKL	3132	P	4	3913;4377		0.931956	6.87701e-09	130.78	128.09	124.17	-1.4987	543190000	0.841654	NaN	0.931956	130.78	NaN	124.17
Q15181	51	Q15181	Q15181	Inorganic pyrophosphatase	PPA1	PIYADKDVFHMVVEVPRWSNAKMEIATKDPL	3142	P	3	3917		0.97115	0.0128624	56.303	50.008	56.303	1.3491	42345000	NaN	NaN	0.97115	NaN	NaN	56.303
Q15181	164	Q15181	Q15181	Inorganic pyrophosphatase	PPA1	EGETDWKVIAINVDDPDAANYNDINDVKRLK	3144	P	4	3917		1	1.90694e-09	62.958	58.805	62.958	-3.0592	26321000	1	NaN	NaN	62.958	NaN	NaN
Q15233	226	Q15233	Q15233	Non-POU domain-containing octamer-binding protein	NONO	GSFLLTTFPRPVTVEPMDQLDDEEGLPEKLV	3148	P	3	3921		0.999999	1.77178e-33	170.44	157.29	106.63	0.39165	203320000	0.999999	NaN	0.999821	170.44	NaN	71.892
Q15233	133	Q15233	Q15233	Non-POU domain-containing octamer-binding protein	NONO	TRTLAEIAKVELDNMPLRGKQLRVRFACHSA	3154	P	3	3921		1	0.0190819	83.418	77.574	83.418	0.38304	20904000	1	NaN	NaN	83.418	NaN	NaN
Q15257	127	Q15257	Q15257	Serine/threonine-protein phosphatase 2A activator	PPP2R4	LVALLNTLDRWIDETPPVDQPSRFGNKAYRT	3155	P	3	3922		0.813785	0.0098982	59.469	59.469	59.469	0.86547	1597200000	0.813785	NaN	NaN	59.469	NaN	NaN
Q15326	425	Q15326	Q15326	Zinc finger MYND domain-containing protein 11	ZMYND11	EPEPETEAVSSSQEIPTMPQPIEKVSVSTQT	3161	P	4	3935		0.811774	1.06194e-06	64.914	63.424	64.914	-0.62001	89585000	0.811774	NaN	NaN	64.914	NaN	NaN
Q15334	698	Q15334	Q15334	Lethal(2) giant larvae protein homolog 1	LLGL1	SKLQEANAQLAEQACPHDVEMTPVQRRIEPR	3162	P	4	3937		0.966855	0.000196985	67.364	58.031	55.783	1.0475	20005000	0.966855	NaN	0.886059	55.783	NaN	67.364
Q15334	817	Q15334	Q15334	Lethal(2) giant larvae protein homolog 1	LLGL1	PLPEPYEASRDLAQAPDMQGGHAVLIASEEQ	3163	P	5	3937		0.999799	6.71662e-06	58.49	53.822	58.49	-0.19502	8463900	0.999799	NaN	NaN	58.49	NaN	NaN
Q15369	14	Q15369	Q15369	Transcription elongation factor B polypeptide 1	TCEB1	__MDGEEKTYGGCEGPDAMYVKLISSDGHEF	3176	P	2	3943		1	0.0299188	69.276	55.069	68.657	-1.0182	238730000	1	NaN	NaN	69.276	NaN	NaN
Q15375	443	Q15375	Q15375	Ephrin type-A receptor 7	EPHA7	QRLFAAVSITTGQAAPSQVSGVMKERVLQRS	3181	P	3	3945		1	9.25039e-05	101.29	88.982	48.656	1.3903	87966000	1	NaN	1	48.656	NaN	101.29
Q15417	198	Q15417	Q15417	Calponin-3	CNN3	GTRRHLYDPKMQTDKPFDQTTISLQMGTNKG	3190	P	4	3955		0.822443	0.0122598	47.745	36.941	47.745	1.2941	18723000	NaN	NaN	0.822443	NaN	NaN	47.745
Q15427	38	Q15427	Q15427	Splicing factor 3B subunit 4	SF3B4	KVSEPLLWELFLQAGPVVNTHMPKDRVTGQH	3191	P	4	3958		0.859245	0.000588145	42.661	38.664	42.661	-2.9169	17025000	0	NaN	0.859245	NaN	NaN	42.661
Q15428	217	Q15428	Q15428	Splicing factor 3A subunit 2	SF3A2	ETKQFFLQFHFKMEKPPAPPSLPAGPPGVKR	3193	P	3	3959		0.770895	0.0031543	88.565	82.555	88.565	0.0049047	21259000	NaN	NaN	0.770895	NaN	NaN	88.565
Q15436	676	Q15436	Q15436	Protein transport protein Sec23A	SEC23A	GETIAQWRKSGYQDMPEYENFRHLLQAPVDD	3199	P	5	3962		0.96218	6.74651e-08	69.094	65.135	69.094	0.66957	274830000	0.785401	NaN	0.96218	52.777	NaN	69.094
Q15437	253	Q15437	Q15437	Protein transport protein Sec23B	SEC23B	IDMNLTDLLGELQRDPWPVTQGKRPLRSTGV	3201	P	3	3963		1	0.000354063	71.428	64.476	71.428	-1.0373	167020000	1	NaN	NaN	71.428	NaN	NaN
Q15437	255	Q15437	Q15437	Protein transport protein Sec23B	SEC23B	MNLTDLLGELQRDPWPVTQGKRPLRSTGVAL	3202	P	3	3963		1	0.000354063	71.428	64.476	71.428	-1.0373	167020000	1	NaN	NaN	71.428	NaN	NaN
Q15437	300	Q15437	Q15437	Protein transport protein Sec23B	SEC23B	GARIMLFTGGPPTQGPGMVVGDELKIPIRSW	3205	P	2	3963		0.984772	2.56904e-31	157.03	157.03	157.03	-0.38462	166100000	0.984772	NaN	NaN	157.03	NaN	NaN
Q15437	212	Q15437	Q15437	Protein transport protein Sec23B	SEC23B	AKQIQDMLGLTKPAMPMQQARPAQPQEHPFA	3206	P	4	3963		0.990462	2.28692e-10	123.43	123.43	123.43	-1.0842	200920000	NaN	NaN	0.990462	NaN	NaN	123.43
Q15459	375	Q15459	Q15459	Splicing factor 3A subunit 1	SF3A1	DDEEEGQKVPPPPETPMPPPLPPTPDQVIVR	3210	P	4	3965		0.919607	9.74487e-06	93.73	91.223	93.73	-0.073158	141220000	0.912383	NaN	0.919607	91.583	NaN	93.73
Q15477	799	Q15477	Q15477	Helicase SKI2W	SKIV2L	QALAELTKRLGALEEPDMTGQLVDLPEYYSW	3212	P	3	3969		0.999986	1.10208e-05	96.492	96.492	96.492	-0.34745	10857000	NaN	NaN	0.999986	NaN	NaN	96.492
Q15477	391	Q15477	Q15477	Helicase SKI2W	SKIV2L	TFGDVGLLTGDVQLHPEASCLIMTTEILRSM	3213	P	3	3969		1	0.000343739	58.345	50.272	58.345	-0.05957	89793000	1	NaN	NaN	58.345	NaN	NaN
Q15545	202	Q15545	Q15545	Transcription initiation factor TFIID subunit 7	TAF7	DETKEAENQGLDISSPGMSGHRQGHDSLEHD	3214	P	3	3978		1	0.00283971	69.125	64.81	69.125	-0.63829	29507000	NaN	NaN	1	NaN	NaN	69.125
Q15648	943	Q15648	Q15648	Mediator of RNA polymerase II transcription subunit 1	MED1	TVDFSIISVAGKALAPADLMEHHSGSQGPLL	3216	P	4	3998		0.865333	0.000401811	60.481	53.683	60.481	0.18347	88573000	0.865333	NaN	NaN	60.481	NaN	NaN
Q15648	956	Q15648	Q15648	Mediator of RNA polymerase II transcription subunit 1	MED1	LAPADLMEHHSGSQGPLLTTGDLGKEKTQKR	3217	P	4	3998		0.952726	0.000188194	63.901	57.537	63.901	-0.11542	211030000	NaN	NaN	0.952726	NaN	NaN	63.901
Q15648	75	Q15648	Q15648	Mediator of RNA polymerase II transcription subunit 1	MED1	SCLETLQKALKVTSLPAMTDRLESIARQNGL	3218	P	3	3998		1	0.00282993	77.562	38.949	77.562	-0.3523	534610000	1	NaN	1	77.562	NaN	75.961
Q15648	643	Q15648	Q15648	Mediator of RNA polymerase II transcription subunit 1	MED1	TPPPVSSMAGNTKNHPMLMNLLKDNPAQDFS	3220	P	3	3998		0.999985	0.00337553	100.23	89.777	100.23	1.3507	11717000	NaN	NaN	0.999985	NaN	NaN	100.23
Q15678	441	Q15678	Q15678	Tyrosine-protein phosphatase non-receptor type 14	PTPN14	IPSHRHSAIIVPSYRPTPDYETVMRQMKRGI	3227	P	3	4006		0.583555	0.00268131	82.01	74.616	82.01	-0.20211	30689000	0.583555	NaN	0.447359	82.01	NaN	73.928
Q15773	53	Q15773	Q15773	Myeloid leukemia factor 2	MLF2	SPFLSITDGNMPGTRPASRRMQQAGAVSPFG	3233	P	3	4022		0.533857	0.0027539	54.259	44.926	54.259	0.97959	19288000	NaN	NaN	0.533857	NaN	NaN	54.259
Q15788	537	Q15788	Q15788	Nuclear receptor coactivator 1	NCOA1	TSSACNNNNRSYSNIPVTSLQGMNEGPNNSV	3235	P	3	4026		0.540308	0.00540976	53.968	48.593	53.968	-1.59	0	0.540308	NaN	NaN	53.968	NaN	NaN
Q15813	438	Q15813	Q15813	Tubulin-specific chaperone E	TBCE	LKYGAPEDWELKTQQPLMLKNQLLTLKIKYP	3236	P	3	4031		0.999998	0.0157698	71.558	68.371	71.558	-0.9503	483110000	0.999998	NaN	NaN	71.558	NaN	NaN
Q16401	309	Q16401	Q16401	26S proteasome non-ATPase regulatory subunit 5	PSMD5	PIFVEKVFEMIESQDPTMIGVAVDTVGILGS	3249	P	3	4061		1	6.00253e-06	74.404	67.129	74.404	0.78666	19221000	1	NaN	NaN	74.404	NaN	NaN
Q16531	681	Q16531	Q16531	DNA damage-binding protein 1	DDB1	LVFSNVNLKEVNYMCPLNSDGYPDSLALANN	3250	P	4	4067		0.984657	5.45575e-08	66.461	61.793	66.461	-1.6911	65117000	NaN	NaN	0.984657	NaN	NaN	66.461
Q16531	176	Q16531	Q16531	DNA damage-binding protein 1	DDB1	ELHVIDVKFLYGCQAPTICFVYQDPQGRHVK	3251	P	3	4067		0.999995	0.00709851	57.338	54.614	57.338	-0.88589	17671000	0.999995	NaN	NaN	57.338	NaN	NaN
Q16543	326	Q16543	Q16543	Hsp90 co-chaperone Cdc37;Hsp90 co-chaperone Cdc37, N-terminally processed	CDC37	VKDVQMLQDAISKMDPTDAKYHMQRCIDSGL	3255	P	4	4072		1	0.013498	64.199	51.432	64.199	-0.42646	40413000	NaN	NaN	1	NaN	NaN	64.199
Q16563	192	Q16563	Q16563	Synaptophysin-like protein 1	SYPL1	DIKIATGHNIIDELPPCKKKAVLCYFGSVTS	3261	P	3	4075		0.543888	0.0219138	56.65	39.144	56.65	0.062728	29905000	0.543888	NaN	NaN	56.65	NaN	NaN
Q16625	322	Q16625	Q16625	Occludin	OCLN	DVPSPPSDYVERVDSPMAYSSNGKVNDKRFY	3267	P	3	4084		0.609624	0.0112476	49.088	45.043	49.088	0.77037	74936000	0.609624	NaN	NaN	49.088	NaN	NaN
Q16706	295	Q16706	Q16706	Alpha-mannosidase 2	MAN2A1	VKPRSGWAIDPFGHSPTMAYLLNRAGLSHML	3268	P	3	4101		0.999801	0.000326808	85.231	73.609	81.807	0.57243	193350000	0.999801	NaN	0.998101	81.807	NaN	85.231
Q16762	212	Q16762	Q16762	Thiosulfate sulfurtransferase	TST	AVGLDSGHIRGAVNMPFMDFLTEDGFEKGPE	3269	P	3	4107		1	1.59724e-05	95.357	95.357	95.357	-0.70561	465410000	0.999993	NaN	1	56.95	NaN	95.357
Q16774	162	Q16774	Q16774	Guanylate kinase	GUK1	KRLAAAQADMESSKEPGLFDVVIINDSLDQA	3270	P	3	4111		1	4.82025e-06	119.18	115.33	119.18	-1.0513	24999000	1	NaN	NaN	119.18	NaN	NaN
Q16775	55	Q16775	Q16775	Hydroxyacylglutathione hydrolase, mitochondrial	HAGH	KNLTVDEGTMKVEVLPALTDNYMYLVIDDET	3272	P	3	4112		1	0.000224987	58.98	53.821	58.98	0.54508	8462300	1	NaN	NaN	58.98	NaN	NaN
Q16787	3095	Q16787	Q16787	Laminin subunit alpha-3	LAMA3	GRLVVDGLRAREGSLPGNSTISIRAPVYLGS	3274	P	2	4113		1	0.0122367	51.495	39.727	51.495	1.7634	192360000	NaN	NaN	1	NaN	NaN	51.495
Q16787	3105	Q16787	Q16787	Laminin subunit alpha-3	LAMA3	REGSLPGNSTISIRAPVYLGSPPSGKPKSLP	3275	P	2	4113		1	0.0122367	51.495	39.727	51.495	1.7634	192360000	NaN	NaN	1	NaN	NaN	51.495
Q16787	3111	Q16787	Q16787	Laminin subunit alpha-3	LAMA3	GNSTISIRAPVYLGSPPSGKPKSLPTNSFVG	3276	P	2	4113		1	0.0122367	51.495	39.727	51.495	1.7634	192360000	NaN	NaN	1	NaN	NaN	51.495
Q16787	3112	Q16787	Q16787	Laminin subunit alpha-3	LAMA3	NSTISIRAPVYLGSPPSGKPKSLPTNSFVGC	3277	P	2	4113		1	0.0122367	51.495	39.727	51.495	1.7634	192360000	NaN	NaN	1	NaN	NaN	51.495
Q16787	3116	Q16787	Q16787	Laminin subunit alpha-3	LAMA3	SIRAPVYLGSPPSGKPKSLPTNSFVGCLKNF	3278	P	2	4113		1	0.0122367	51.495	39.727	51.495	1.7634	192360000	NaN	NaN	1	NaN	NaN	51.495
Q16795	96	Q16795	Q16795	NADH dehydrogenase [ubiquinone] 1 alpha subcomplex subunit 9, mitochondrial	NDUFA9	IIPYRCDKYDIMHLRPMGDLGQLLFLEWDAR	3280	P	3	4114		1	0.0150148	41.208	23.492	41.208	-2.0219	0	1	NaN	NaN	41.208	NaN	NaN
Q16851	450	Q16851	Q16851	UTP--glucose-1-phosphate uridylyltransferase	UGP2	SFTKVQDYLRRFESIPDMLELDHLTVSGDVT	3284	P	3	4123		1	1.79796e-05	115.87	104.24	115.87	0.3779	294350000	NaN	NaN	1	NaN	NaN	115.87
Q27J81	396	Q27J81	Q27J81	Inverted formin-2	INF2	PSVEGQQPAAAAACEPVDHAQSESILKVSQP	3295	P	3	4147		0.963747	0.0156929	41.047	35.267	41.047	-2.0708	14299000	0.963747	NaN	NaN	41.047	NaN	NaN
Q29RF7	794	Q29RF7	Q29RF7	Sister chromatid cohesion protein PDS5 homolog A	PDS5A	SLGHISMLAPDQFASPMKSVVANFIVKDLLM	3297	P	4	4150		0.675355	0.010166	55.871	55.871	55.871	0.48311	274650000	0.675355	NaN	NaN	55.871	NaN	NaN
Q2NL82	689	Q2NL82	Q2NL82	Pre-rRNA-processing protein TSR1 homolog	TSR1	GMHSLIATGHLMSVDPDRMVIKRVVLSGHPF	3301	P	6	4167		1	0.00641834	41.763	38.882	41.763	-0.48231	86833000	NaN	NaN	1	NaN	NaN	41.763
Q2PZI1	11	Q2PZI1	Q2PZI1	Probable C-mannosyltransferase DPY19L1	DPY19L1	_____MEGRPPPEGRPPPRPRTGRAPRGRRR	3305	P	2	4169		0.880433	0.0287515	41.283	6.7511	41.283	0.5875	48396000	0.880433	NaN	NaN	41.283	NaN	NaN
Q2PZI1	12	Q2PZI1	Q2PZI1	Probable C-mannosyltransferase DPY19L1	DPY19L1	____MEGRPPPEGRPPPRPRTGRAPRGRRRA	3306	P	2	4169		0.999143	0.0287515	41.283	6.7511	41.283	0.5875	48396000	0.999143	NaN	NaN	41.283	NaN	NaN
Q2PZI1	13	Q2PZI1	Q2PZI1	Probable C-mannosyltransferase DPY19L1	DPY19L1	___MEGRPPPEGRPPPRPRTGRAPRGRRRAV	3307	P	2	4169		0.999143	0.0287515	41.283	6.7511	41.283	0.5875	48396000	0.999143	NaN	NaN	41.283	NaN	NaN
Q2PZI1	557	Q2PZI1	Q2PZI1	Probable C-mannosyltransferase DPY19L1	DPY19L1	IKYSTKPDAVFAGAMPTMASVKLSALRPIVN	3308	P	3	4169		0.999937	0.0299484	48.836	40.192	48.836	-0.12452	220930000	0.999937	NaN	0.999872	48.836	NaN	41.912
Q2TAA5	200	Q2TAA5	Q2TAA5	GDP-Man:Man(3)GlcNAc(2)-PP-Dol alpha-1,2-mannosyltransferase	ALG11	FKYIGGCQVGSYVHYPTISTDMLSVVKNQNI	3310	P	3	4174		1	0.0237702	41.904	26.398	41.904	1.5344	13821000	NaN	NaN	1	NaN	NaN	41.904
Q32MZ4	645	Q32MZ4	Q32MZ4	Leucine-rich repeat flightless-interacting protein 1	LRRFIP1	PKQKIAAESSENVDCPENPKIKLDGKLDQEG	3312	P	2	4189		0.999281	1.49739e-05	168.83	158.5	168.83	2.0364	80095000	0.999281	NaN	NaN	168.83	NaN	NaN
Q32P28	332	Q32P28	Q32P28	Prolyl 3-hydroxylase 1	LEPRE1	YTQAVECAKTYLLFFPNDEVMNQNLAYYAAM	3315	P	3	4192		1	0.000203982	87.489	83.749	87.489	-1.0693	144040000	NaN	NaN	1	NaN	NaN	87.489
Q3B7T1	1145	Q3B7T1	Q3B7T1	Erythroid differentiation-related factor 1	EDRF1	GQPKSGDAAAAADASPSLNREEVMKLLSIFE	3318	P	3	4198		1	0.027728	50.425	41.633	50.425	-0.58965	5940800	NaN	NaN	1	NaN	NaN	50.425
Q3LXA3	131	Q3LXA3	Q3LXA3	Bifunctional ATP-dependent dihydroxyacetone kinase/FAD-AMP lyase (cyclizing);ATP-dependent dihydroxyacetone kinase;FAD-AMP lyase (cyclizing)	DAK	LNFGLAREQARAEGIPVEMVVIGDDSAFTVL	3320	P	2	4213		1	0.00927257	78.932	71.523	71.354	2.6878	0	1	NaN	NaN	78.932	NaN	NaN
Q49AR2	330	Q49AR2	Q49AR2	UPF0489 protein C5orf22	C5orf22	CDGDDEETVQRWASNPGMESLVPLVQSLKKR	3324	P	3	4241		0.999999	0.00874217	84.499	81.446	84.499	-0.16809	108640000	NaN	NaN	0.999999	NaN	NaN	84.499
Q52LJ0	168	Q52LJ0	Q52LJ0	Protein FAM98B	FAM98B	MFDTLGIPKSTTSDIPHMLNQVESKVKDILS	3342	P	3	4277		1	0.0166994	56.959	46.3	56.959	-0.42635	22513000	NaN	NaN	1	NaN	NaN	56.959
Q53FT3	167	Q53FT3	Q53FT3	Protein Hikeshi	C11orf73	FASSFAVSQAQMTPSPSEMFIPANVVLKWYE	3349	P	3	4288		0.745573	1.38535e-05	54.326	54.326	54.326	0.068212	17536000	0.745573	NaN	NaN	54.326	NaN	NaN
Q53GA4	149	Q53GA4	Q53GA4	Pleckstrin homology-like domain family A member 2	PHLDA2	PSEPSEPSRPSPQPKPRTP____________	3355	P	4	4292		0.802239	2.94868e-05	56.041	53.931	42.904	-0.67687	46180000	0.798432	NaN	0.802239	56.041	NaN	42.904
Q53SF7	815	Q53SF7	Q53SF7	Cordon-bleu protein-like 1	COBLL1	PNLRTEHQVPSSVSSPDDAMVSPLKPAPKMT	3362	P	5	4315		0.987105	0.000261526	58.08	55.541	58.08	-0.13115	13924000	NaN	NaN	0.987105	NaN	NaN	58.08
Q562E7	228	Q562E7	Q562E7	WD repeat-containing protein 81	WDR81	PACPSLLRAEALLESPEMLYVVHPYVQFSLH	3363	P	4	4319		0.996844	4.57746e-07	64.686	59.142	64.686	-0.25161	39647000	0.996844	NaN	NaN	64.686	NaN	NaN
Q562R1	131	Q562R1	Q562R1	Beta-actin-like protein 2	ACTBL2	NREKMTQIMFEAFNTPAMYVAIQAVLSLYAS	3365	P	3	4321		1	0.0032938	55.783	49.752	55.783	1.3966	0	1	NaN	NaN	55.783	NaN	NaN
Q5BJH7	30	Q5BJH7	Q5BJH7	Protein YIF1B	YIF1B	RLRKWPSKRRIPVSQPGMADPHQLFDDTSSA	3367	P	4	4341		0.996198	1.61833e-05	91.618	84.743	91.618	-0.61644	195630000	0.996198	NaN	NaN	91.618	NaN	NaN
Q5BKZ1	163	Q5BKZ1	Q5BKZ1	DBIRD complex subunit ZNF326	ZNF326	DRGRENYSSYSSFSSPHMKPAPVGSRGRGTP	3369	P	5	4346		0.791648	0.000741873	69.981	62.535	48.115	-1.0992	101810000	0.791648	NaN	0.78979	51.398	NaN	69.981
Q5BKZ1	28	Q5BKZ1	Q5BKZ1	DBIRD complex subunit ZNF326	ZNF326	RNTYQGFNGMDRDYGPGSYGGMDRDYGHGSY	3370	P	5	4346		1	1.28511e-05	107.29	105.89	107.29	-0.0028046	199670000	NaN	NaN	1	NaN	NaN	107.29
Q5JRA6	1645	Q5JRA6	Q5JRA6	Melanoma inhibitory activity protein 3	MIA3	TQKMAMLQEEPVIVKPMPGKPNTQNPPRRGP	3375	P	4	4383		0.940105	0.00163296	59.943	59.943	59.943	0.44615	232570000	0.835113	NaN	0.940105	56.95	NaN	59.943
Q5JRX3	302	Q5JRX3	Q5JRX3	Presequence protease, mitochondrial	PITRM1	KFQKIEPSTVVPAQTPWDKPREFQITCGPDS	3376	P	3	4384		0.999996	0.00416139	91.657	78.808	91.657	-0.61096	168520000	0.999996	NaN	NaN	91.657	NaN	NaN
Q5JRX3	306	Q5JRX3	Q5JRX3	Presequence protease, mitochondrial	PITRM1	IEPSTVVPAQTPWDKPREFQITCGPDSFATD	3377	P	3	4384		0.999988	0.00416139	91.657	78.808	91.657	-0.61096	168520000	0.999988	NaN	NaN	91.657	NaN	NaN
Q5JSH3	383	Q5JSH3	Q5JSH3	WD repeat-containing protein 44	WDR44	IPLSLAEEKLPTGINPLTLHIMRRTKEYVSN	3382	P	5	4387		0.981326	3.44847e-05	80.93	78.884	80.93	1.0657	179540000	0.927421	NaN	0.981326	54.732	NaN	80.93
Q5JTH9	449	Q5JTH9	Q5JTH9	RRP12-like protein	RRP12	AATQSLKEILKECVAPHMADIGSVTSSASGP	3385	P	3	4393		1	1.0876e-19	151.01	133.86	151.01	0.013488	175460000	0.999987	NaN	1	63.63	NaN	151.01
Q5JTV8	138	Q5JTV8	Q5JTV8	Torsin-1A-interacting protein 1	TOR1AIP1	KTRRTTRLQQQHSEQPPLQPSPVMTRRGLRD	3388	P	2	4395		1	0.000345049	75.462	63.317	48.112	-3.1231	24405000	1	0	1	69.92	NaN	75.462
Q5JTV8	139	Q5JTV8	Q5JTV8	Torsin-1A-interacting protein 1	TOR1AIP1	TRRTTRLQQQHSEQPPLQPSPVMTRRGLRDS	3389	P	2	4395		1	0.000345049	75.462	63.317	48.112	-3.1231	24405000	1	0	1	69.92	NaN	75.462
Q5JU69	239	Q5JU69	Q5JU69	Torsin-2A	TOR2A	LQELEPVISRAVLDNPHHGFSNSGIMEERLL	3392	P	5	4399		0.999998	5.47734e-07	74.65	65.428	74.65	0.68549	46351000	NaN	NaN	0.999998	NaN	NaN	74.65
Q5PRF9	247	Q5PRF9	Q5PRF9	Protein Smaug homolog 2	SAMD4B	PLKRSMSLIPTSPQVPGEWPSPEELGARAAF	3399	P	3	4417		0.639624	9.34895e-05	71.696	65.192	71.696	1.5228	46366000	0.639624	NaN	0.435528	71.696	NaN	63.037
Q5PRF9	251	Q5PRF9	Q5PRF9	Protein Smaug homolog 2	SAMD4B	SMSLIPTSPQVPGEWPSPEELGARAAFTTPD	3400	P	3	4417		0.915152	9.34895e-05	71.696	65.192	71.696	1.5228	46366000	0.915152	NaN	NaN	71.696	NaN	NaN
Q5QJ74	393	Q5QJ74	Q5QJ74	Tubulin-specific chaperone cofactor E-like protein	TBCEL	LPTSNMLLYYFDHEAPFGPEEMKYSSRALHS	3402	P	4	4419		0.536435	1.25267e-05	67.459	62.247	67.459	-3.8099	71200000	0.536435	NaN	NaN	67.459	NaN	NaN
Q5R3I4	139	Q5R3I4	Q5R3I4	Tetratricopeptide repeat protein 38	TTC38	FPKACELWEQILQDHPTDMLALKFSHDAYFY	3404	P	3	4423		1	0.000598434	77.08	71.872	77.08	-1.0396	70238000	1	NaN	NaN	77.08	NaN	NaN
Q5SSJ5	356	Q5SSJ5	Q5SSJ5	Heterochromatin protein 1-binding protein 3	HP1BP3	LMEYAILSAIAAMNEPKTCSTTALKKYVLEN	3408	P	4	4436		0.985318	0.000172527	68.76	68.76	68.76	1.9598	202460000	0.898191	NaN	0.985318	60.481	NaN	68.76
Q5SXM2	914	Q5SXM2	Q5SXM2	snRNA-activating protein complex subunit 4	SNAPC4	EKRLQEARAREATRGPVVLPSQLLVSSSVIL	3411	P	5	4445		0.999888	0.00799035	40.544	38.491	40.544	3.1899	45168000	0.999888	NaN	NaN	40.544	NaN	NaN
Q5SXM2	918	Q5SXM2	Q5SXM2	snRNA-activating protein complex subunit 4	SNAPC4	QEARAREATRGPVVLPSQLLVSSSVILQPPL	3412	P	5	4445		0.99949	0.00799035	40.544	38.491	40.544	3.1899	45168000	0.99949	NaN	NaN	40.544	NaN	NaN
Q5SXM2	932	Q5SXM2	Q5SXM2	snRNA-activating protein complex subunit 4	SNAPC4	LPSQLLVSSSVILQPPLPHTPHGRPAPGPTV	3413	P	5	4445		0.511218	0.00799035	40.544	38.491	40.544	3.1899	45168000	0.511218	NaN	NaN	40.544	NaN	NaN
Q5SXM2	934	Q5SXM2	Q5SXM2	snRNA-activating protein complex subunit 4	SNAPC4	SQLLVSSSVILQPPLPHTPHGRPAPGPTVLN	3414	P	5	4445		0.511218	0.00799035	40.544	38.491	40.544	3.1899	45168000	0.511218	NaN	NaN	40.544	NaN	NaN
Q5SXM2	937	Q5SXM2	Q5SXM2	snRNA-activating protein complex subunit 4	SNAPC4	LVSSSVILQPPLPHTPHGRPAPGPTVLNVPL	3415	P	5	4445		0.511218	0.00799035	40.544	38.491	40.544	3.1899	45168000	0.511218	NaN	NaN	40.544	NaN	NaN
Q5SXM2	371	Q5SXM2	Q5SXM2	snRNA-activating protein complex subunit 4	SNAPC4	MLTQLVQEMRVGSHIPYRRIVYYMEGRDSMQ	3416	P	2	4445		1	0.0184978	79.82	16.729	50.145	-1.6745	159540000	1	NaN	NaN	79.82	NaN	NaN
Q5SXM8	177	Q5SXM8	Q5SXM8	DNL-type zinc finger protein	DNLZ	EAGEDEGPPSPGKTEPS______________	3422	P	4	4446		0.835291	9.46685e-05	44.641	41.904	44.641	-2.7208	37678000	NaN	NaN	0.835291	NaN	NaN	44.641
Q5SYE7	1135	Q5SYE7	Q5SYE7	NHS-like protein 1	NHSL1	LKSRNSTNEMESESQPASVTSSLPTPAKSSS	3424	P	3	4448		0.999706	0.0350755	40.142	36.479	40.142	0.22531	23809000	0.999706	NaN	NaN	40.142	NaN	NaN
Q5SYE7	1180	Q5SYE7	Q5SYE7	NHS-like protein 1	NHSL1	SRSPGAPSAGEAEARPSPSTTPLPDSSPSRK	3425	P	3	4448		0.999232	0.00236088	58.938	52.378	58.938	-2.127	20114000	0.999232	NaN	NaN	58.938	NaN	NaN
Q5SYE7	1182	Q5SYE7	Q5SYE7	NHS-like protein 1	NHSL1	SPGAPSAGEAEARPSPSTTPLPDSSPSRKPP	3426	P	3	4448		0.999232	0.00236088	58.938	52.378	58.938	-2.127	20114000	0.999232	NaN	NaN	58.938	NaN	NaN
Q5SYE7	1186	Q5SYE7	Q5SYE7	NHS-like protein 1	NHSL1	PSAGEAEARPSPSTTPLPDSSPSRKPPPISK	3427	P	3	4448		0.999227	0.00236088	58.938	52.378	58.938	-2.127	20114000	0.999227	NaN	NaN	58.938	NaN	NaN
Q5SYE7	1188	Q5SYE7	Q5SYE7	NHS-like protein 1	NHSL1	AGEAEARPSPSTTPLPDSSPSRKPPPISKKP	3428	P	3	4448		0.999862	0.00236088	58.938	52.378	58.938	-2.127	20114000	0.999862	NaN	NaN	58.938	NaN	NaN
Q5SYE7	1192	Q5SYE7	Q5SYE7	NHS-like protein 1	NHSL1	EARPSPSTTPLPDSSPSRKPPPISKKPKLFL	3429	P	3	4448		0.999346	0.00236088	58.938	52.378	58.938	-2.127	20114000	0.999346	NaN	NaN	58.938	NaN	NaN
Q5T5P2	1003	Q5T5P2	Q5T5P2	Sickle tail protein homolog	KIAA1217	EKLLEEAQANIMKSIPNLEMPPATGPLPRGD	3436	P	2	4482		0.731615	0.0212804	45.257	20.914	45.257	3.432	233710000	NaN	NaN	0.731615	NaN	NaN	45.257
Q5TKA1	276	Q5TKA1	Q5TKA1	Protein lin-9 homolog	LIN9	LGTHTIPDYEVLSNEPHETMPIAAFGQKQRP	3450	P	4	4530		0.945624	3.49389e-05	80.847	76.133	80.847	-1.9174	54874000	0.945624	NaN	NaN	80.847	NaN	NaN
Q5UIP0	967	Q5UIP0	Q5UIP0	Telomere-associated protein RIF1	RIF1	KPVLTQAKQKFLLLLPGLETVEMMEESSGPY	3452	P	4	4538		0.880224	8.24761e-05	67.283	67.283	67.283	-1.636	16495000	NaN	NaN	0.880224	NaN	NaN	67.283
Q5UIP0	1102	Q5UIP0	Q5UIP0	Telomere-associated protein RIF1	RIF1	DVSQDTLFTQYSQEEPMEIPTLTRKPKEDSK	3453	P	4	4538		0.803103	0.000388016	46.898	46.898	46.898	-0.44437	15806000	NaN	NaN	0.803103	NaN	NaN	46.898
Q5VIR6	392	Q5VIR6	Q5VIR6	Vacuolar protein sorting-associated protein 53 homolog	VPS53	SPPPSTNPFLEDEPTPEMEELATEKGDLDQP	3454	P	4	4539		0.995344	3.85022e-31	163.51	158.45	163.51	-0.40233	71350000	0.995344	NaN	NaN	163.51	NaN	NaN
Q5VSL9	550	Q5VSL9	Q5VSL9	Striatin-interacting protein 1	STRIP1	SKAKTDSINILADVLPEEMPTTVLQSMKLGV	3455	P	3	4542		0.96734	0.00224689	59.282	59.282	59.282	-2.2855	50442000	NaN	NaN	0.96734	NaN	NaN	59.282
Q5VTE0	333	Q5VTE0	Q5VTE0	Putative elongation factor 1-alpha-like 3	EEF1A1P5	KDVRRGNVAGDSKNDPPMEAAGFTAQVIILN	3457	P	5	4551		0.529833	3.55376e-08	52.627	52.627	52.627	-1.4254	21111000	NaN	NaN	0.529833	NaN	NaN	52.627
Q5VTE0	359	Q5VTE0	Q5VTE0	Putative elongation factor 1-alpha-like 3	EEF1A1P5	VIILNHPGQISAGYAPVLDCHMAHIACKFAE	3458	P	5	4551		0.989158	3.55376e-08	52.627	52.627	52.627	-1.4254	21111000	NaN	NaN	0.989158	NaN	NaN	52.627
Q5VTL8	60	Q5VTL8	Q5VTL8	Pre-mRNA-splicing factor 38B	PRPF38B	NVLPLWGNEKTMNLNPMILTNILSSPYFKVQ	3459	P	2	4553		1	5.98878e-06	123.29	111.31	123.29	-0.7247	45547000	1	NaN	NaN	123.29	NaN	NaN
Q5VU43	825	Q5VU43	Q5VU43	Myomegalin	PDE4DIP	LIKDLQMQLVDPEDIPAMERLTQEVLLLREK	3460	P	4	4556		0.950183	0.000204866	73.341	73.341	73.341	0.91428	30016000	NaN	NaN	0.950183	NaN	NaN	73.341
Q5VWQ0	330	Q5VWQ0	Q5VWQ0	Round spermatid basic protein 1	RSBN1	EQLCRLNLGMQEYRVPQGVQTPFMTHQEHSI	3462	P	6	4577		0.991121	0.00296119	41.939	36.354	41.939	-2.3752	71147000	0.991121	NaN	NaN	41.939	NaN	NaN
Q5VYK3	876	Q5VYK3	Q5VYK3	Proteasome-associated protein ECM29 homolog	ECM29	AIQTLGYFPVGDGDFPHQKLLLQGLMDSVEA	3463	P	4	4581		0.992652	0.00373921	41.209	36.4	41.209	1.9934	18054000	NaN	NaN	0.992652	NaN	NaN	41.209
Q5VZK9	791	Q5VZK9	Q5VZK9	Leucine-rich repeat-containing protein 16A	LRRC16A	KALLESMVDAAENLCPNVMKKAHIRQDLIHA	3465	P	4	4588		1	0.0145652	45.126	40.437	45.126	1.0419	4016200	NaN	NaN	1	NaN	NaN	45.126
Q5XPI4	883	Q5XPI4	Q5XPI4	E3 ubiquitin-protein ligase RNF123	RNF123	SVAINSYSALKNYFGPVHSMEELPGYEETLT	3469	P	3	4601		0.918976	0.00153852	63.056	60.648	63.056	-0.2388	53283000	0.918976	NaN	0.820968	63.056	NaN	47.75
Q63HN8	1765	Q63HN8	Q63HN8	E3 ubiquitin-protein ligase RNF213	RNF213	SEAARYRMRRVMEELPLMLLSEFSLVDKLRI	3470	P	3	4608		1	0.00325256	62.966	51.32	62.966	0.79089	23251000	NaN	NaN	1	NaN	NaN	62.966
Q659A1	426	Q659A1	Q659A1	Little elongation complex subunit 2	ICE2	TKVSKSPSPASTSTVPNMTDAPTAPKAGTTT	3471	P	2	4616		0.999917	3.61968e-10	138.21	110.53	138.21	0.87756	14929000	NaN	NaN	0.999917	NaN	NaN	138.21
Q68CP9	471	Q68CP9	Q68CP9	AT-rich interactive domain-containing protein 2	ARID2	MFGPDALAAVKLIEHPSSSHQMLSEIRPQAI	3473	P	3	4630		1	4.30454e-06	54.598	31.795	54.598	-0.51881	206680000	1	NaN	0.976452	54.598	NaN	53.32
Q68CP9	483	Q68CP9	Q68CP9	AT-rich interactive domain-containing protein 2	ARID2	IEHPSSSHQMLSEIRPQAIEQVQTQTHVASA	3474	P	6	4630		0.908741	8.76947e-08	105.81	101.17	87.893	0.23029	368780000	0.907568	NaN	0.908741	105.81	NaN	87.893
Q68EM7	396	Q68EM7	Q68EM7	Rho GTPase-activating protein 17	ARHGAP17	FLAKLAQTSDVNKMTPSNIAIVLGPNLLWAR	3483	P	3	4648		1	2.72392e-05	113.47	109.03	113.47	0.27866	80248000	NaN	NaN	1	NaN	NaN	113.47
Q69YH5	600	Q69YH5	Q69YH5	Cell division cycle-associated protein 2	CDCA2	SKKPLLSPIPELPEVPEMTPSIPSIRRLGSG	3485	P	4	4649		0.724359	0.003699	57.432	55.067	57.432	-0.70786	197620000	0	NaN	0.724359	NaN	NaN	57.432
Q69YN4	1649	Q69YN4	Q69YN4	Protein virilizer homolog	KIAA1429	RPHDIFRQRKQNTSRPPSMHVDDFVAAESKE	3488	P	4	4652		0.595357	2.20969e-09	113.17	99.435	113.17	0.35468	49320000	NaN	NaN	0.595357	NaN	NaN	113.17
Q69YN4	371	Q69YN4	Q69YN4	Protein virilizer homolog	KIAA1429	KTTFEIEISRMKDQGPDKENSGAIEASVKLT	3489	P	4	4652		1	0.0210029	51.819	48.158	51.819	-0.17542	92338000	1	NaN	NaN	51.819	NaN	NaN
Q69YN4	139	Q69YN4	Q69YN4	Protein virilizer homolog	KIAA1429	IYGSVDRVISHDRDSPPPPPPPPPPPQPQPS	3490	P	4	4652		0.813774	0.0102083	40.104	39.334	40.104	-0.04295	7098800	NaN	NaN	0.813774	NaN	NaN	40.104
Q69YN4	140	Q69YN4	Q69YN4	Protein virilizer homolog	KIAA1429	YGSVDRVISHDRDSPPPPPPPPPPPQPQPSL	3491	P	4	4652		0.813774	0.0102083	40.104	39.334	40.104	-0.04295	7098800	NaN	NaN	0.813774	NaN	NaN	40.104
Q69YN4	141	Q69YN4	Q69YN4	Protein virilizer homolog	KIAA1429	GSVDRVISHDRDSPPPPPPPPPPPQPQPSLK	3492	P	4	4652		0.813774	0.0102083	40.104	39.334	40.104	-0.04295	7098800	NaN	NaN	0.813774	NaN	NaN	40.104
Q69YN4	142	Q69YN4	Q69YN4	Protein virilizer homolog	KIAA1429	SVDRVISHDRDSPPPPPPPPPPPQPQPSLKR	3493	P	4	4652		0.813774	0.0102083	40.104	39.334	40.104	-0.04295	7098800	NaN	NaN	0.813774	NaN	NaN	40.104
Q69YN4	143	Q69YN4	Q69YN4	Protein virilizer homolog	KIAA1429	VDRVISHDRDSPPPPPPPPPPPQPQPSLKRN	3494	P	4	4652		0.813774	0.0102083	40.104	39.334	40.104	-0.04295	7098800	NaN	NaN	0.813774	NaN	NaN	40.104
Q6AW86	102	Q6AW86	Q6AW86	Zinc finger protein 324B	ZNF324B	DRDVSGEWPRAFPDTPPGMTTSVFPVADACH	3504	P	3	4660		0.532019	0.0021254	59.678	52.725	57.945	-1.8325	50172000	NaN	NaN	0.532019	NaN	NaN	59.678
Q6DD87	374	Q6DD87	Q6DD87	Zinc finger protein 787	ZNF787	GEEEDDDDEAAGGRCPECRGGEGR_______	3505	P	3	4666		1	6.85461e-05	89.011	89.011	63.302	-3.0794	321490000	1	NaN	1	89.011	NaN	80.238
Q6DKK2	112	Q6DKK2	Q6DKK2	Tetratricopeptide repeat protein 19, mitochondrial	TTC19	IQLLKRAKLSIMKDEPEEAELILHDALRLAY	3508	P	5	4672		1	0.0037271	53.201	39.329	53.201	-1.0646	50028000	1	NaN	NaN	53.201	NaN	NaN
Q6IBW4	462	Q6IBW4	Q6IBW4	Condensin-2 complex subunit H2	NCAPH2	PEGADPREAADLDAVPMSLSYEELVRRNVEL	3510	P	3	4693		1	1.28572e-05	120.31	107.24	120.31	0.16635	86025000	1	NaN	NaN	120.31	NaN	NaN
Q6IBW4	164	Q6IBW4	Q6IBW4	Condensin-2 complex subunit H2	NCAPH2	PMALVAPDEMEKNNNPLYSRQGEVLASRKDF	3512	P	4	4693		0.505468	2.83591e-07	54.389	50.436	54.389	2.0573	27669000	0.505468	NaN	NaN	54.389	NaN	NaN
Q6ICC9	18	Q6ICC9	Q6ICC9	Protein LDOC1L	LDOC1L	QPQTSKAESPALAASPNAQMDDVIDTLTSLR	3514	P	3	4696		0.999738	0.000522959	70.533	67.005	70.533	-1.578	31017000	0.999738	NaN	NaN	70.533	NaN	NaN
Q6ICG6	280	Q6ICG6	Q6ICG6	Uncharacterized protein KIAA0930	KIAA0930	DTSPCGTEEDSSPASPMHERVTSFSTPPTPE	3515	P	3	4697		0.984515	0.00202961	59.943	57.063	59.943	-0.7724	26678000	0.984515	NaN	NaN	59.943	NaN	NaN
Q6JQN1	438	Q6JQN1	Q6JQN1	Acyl-CoA dehydrogenase family member 10	ACAD10	RTWVKQYRASETSTIPAMERLIEWLPLHLPR	3517	P	2	4715		1	0.0197001	130.41	107.77	130.41	-0.25909	57970000	NaN	NaN	1	NaN	NaN	130.41
Q6KC79	1190	Q6KC79	Q6KC79	Nipped-B-like protein	NIPBL	KEKQKKRKAYEPKLTPEEMMDSSTFKRFTAS	3519	P	3	4716		1	0.0154697	60.401	55.686	55.841	0.43572	68938000	1	NaN	NaN	60.401	NaN	NaN
Q6KC79	6	Q6KC79	Q6KC79	Nipped-B-like protein	NIPBL	__________MNGDMPHVPITTLAGIASLTD	3520	P	3	4716		0.892479	3.16919e-35	162.19	162.19	162.19	2.6162	63297000	0.892479	NaN	NaN	162.19	NaN	NaN
Q6KC79	9	Q6KC79	Q6KC79	Nipped-B-like protein	NIPBL	_______MNGDMPHVPITTLAGIASLTDLLN	3521	P	3	4716		0.54474	4.94449e-10	63.727	63.727	63.727	4.3135	28947000	0.54474	NaN	NaN	63.727	NaN	NaN
Q6NW29	117	Q6NW29	Q6NW29	RWD domain-containing protein 4	RWDD4	EYAKDNKEQFMENHNPINSATSISNIISIET	3526	P	3	4750		0.999327	0.00563809	41.434	36.222	41.434	0.75478	20229000	0.999327	NaN	NaN	41.434	NaN	NaN
Q6NXE6	87	Q6NXE6	Q6NXE6	Armadillo repeat-containing protein 6	ARMC6	IVKTAPKVSADGSQEPTHDILQMLSDLQESV	3527	P	4	4754		0.999922	0.00043245	42.461	38.144	42.461	2.2526	15501000	NaN	NaN	0.999922	NaN	NaN	42.461
Q6NYC1	129	Q6NYC1	Q6NYC1	Bifunctional arginine demethylase and lysyl-hydroxylase JMJD6	JMJD6	MKYYIEYMESTRDDSPLYIFDSSYGEHPKRR	3528	P	4	4759		0.999996	0.00118123	56.303	53.896	56.303	0.48413	10623000	0.999996	NaN	NaN	56.303	NaN	NaN
Q6NZY4	661	Q6NZY4	Q6NZY4	Zinc finger CCHC domain-containing protein 8	ZCCHC8	ADTSPSTATKIHSPIPDMSKFATGITPFEFE	3529	P	4	4764		0.755292	9.7854e-06	77.791	77.791	77.791	-1.9164	31819000	NaN	NaN	0.755292	NaN	NaN	77.791
Q6P1J9	414	Q6P1J9	Q6P1J9	Parafibromin	CDC73	RENETLIQRRKDQMQPGGTAISVTVPYRVVD	3531	P	4	4772		1	0.00333009	69.737	60.573	69.737	0.51144	79897000	NaN	NaN	1	NaN	NaN	69.737
Q6P1N0	69	Q6P1N0	Q6P1N0	Coiled-coil and C2 domain-containing protein 1A	CC2D1A	GQPPALEKLKGKGPLPMEAIEKMASLCMRDP	3543	P	3	4780		0.994166	0.0355409	88.561	69.966	88.561	0.42207	91876000	NaN	NaN	0.994166	NaN	NaN	88.561
Q6P1S2	11	Q6P1S2	Q6P1S2	Protein C3orf33	C3orf33	_____MAGQPAATGSPSADKDGMEPNVVARI	3547	P	1	4786		0.999613	0.000929367	51.175	35.583	40.154	-0.22712	96518000	NaN	NaN	0.999613	NaN	NaN	51.175
Q6P2Q9	1065	Q6P2Q9	Q6P2Q9	Pre-mRNA-processing-splicing factor 8	PRPF8	LLVLGLHRASEMAGPPQMPNDFLSFQDIATE	3554	P	3	4795		0.920549	2.41929e-05	76.967	76.967	76.967	-0.05217	107540000	0.920549	NaN	NaN	76.967	NaN	NaN
Q6P2Q9	408	Q6P2Q9	Q6P2Q9	Pre-mRNA-processing-splicing factor 8	PRPF8	LYTDNTANGIALLWAPRPFNLRSGRTRRALD	3555	P	3	4795		1	0.00455512	70.76	63.886	70.76	-2.4766	17063000	0.999909	NaN	1	52.359	NaN	70.76
Q6P2Q9	410	Q6P2Q9	Q6P2Q9	Pre-mRNA-processing-splicing factor 8	PRPF8	TDNTANGIALLWAPRPFNLRSGRTRRALDIP	3556	P	3	4795		1	0.00455512	70.76	63.886	70.76	-2.4766	17063000	0.999909	NaN	1	52.359	NaN	70.76
Q6P2Q9	2174	Q6P2Q9	Q6P2Q9	Pre-mRNA-processing-splicing factor 8	PRPF8	LPGQLPQHEYLKEMEPLGWIHTQPNESPQLS	3557	P	4	4795		0.887838	0.000526936	53.259	47.479	53.259	-0.47769	36876000	0.887838	NaN	NaN	53.259	NaN	NaN
Q6P2Q9	2182	Q6P2Q9	Q6P2Q9	Pre-mRNA-processing-splicing factor 8	PRPF8	EYLKEMEPLGWIHTQPNESPQLSPQDVTTHA	3558	P	4	4795		0.887838	0.000526936	53.259	47.479	53.259	-0.47769	36876000	0.887838	NaN	NaN	53.259	NaN	NaN
Q6P2Q9	2290	Q6P2Q9	Q6P2Q9	Pre-mRNA-processing-splicing factor 8	PRPF8	AQSSWNYNFMGVRHDPNMKYELQLANPKEFY	3559	P	2	4795		1	0.000643207	127.56	110.65	127.56	0.40816	54411000	1	NaN	NaN	127.56	NaN	NaN
Q6PD62	595	Q6PD62	Q6PD62	RNA polymerase-associated protein CTR9 homolog	CTR9	EWGPGQKKFERILKQPSTQSDTYSMLALGNV	3574	P	4	4835		0.999998	2.60209e-05	67.69	57.979	67.69	-0.47939	72496000	0.999988	NaN	0.999998	54.324	NaN	67.69
Q6PI47	140	Q6PI47	Q6PI47	BTB/POZ domain-containing protein KCTD18	KCTD18	ALTDFCDSYGLVCNKPTVWVLHYLNTSGASC	3576	P	4	4847		1	0.0330578	42.382	30.594	42.382	-3.2142	32841000	NaN	NaN	1	NaN	NaN	42.382
Q6PID6	158	Q6PID6	Q6PID6	Tetratricopeptide repeat protein 33	TTC33	IILAIRSFQVALHIYPMNPEIWKEDLSWART	3577	P	3	4852		0.985613	6.32759e-13	135.72	128.77	135.72	-1.0648	49077000	0.842241	NaN	0.985613	63.573	NaN	135.72
Q6PJG6	384	Q6PJG6	Q6PJG6	BRCA1-associated ATM activator 1	BRAT1	LAHLEELQPLPQRPSPWPQASLLGATVTVLR	3580	P	3	4863		0.587826	0.000377313	65.69	60.478	65.69	0.26927	15151000	0.518525	NaN	0.587826	55.442	NaN	65.69
Q6PJT7	482	Q6PJT7	Q6PJT7	Zinc finger CCCH domain-containing protein 14	ZC3H14	FILKKPKLSEEVVVAPNQESGMKTADSLRVL	3581	P	2	4867		1	0.0125216	100.72	87.742	100.72	-0.3199	289340000	1	NaN	1	100.72	NaN	57.174
Q6PKG0	1062	Q6PKG0	Q6PKG0	La-related protein 1	LARP1	GGEGRKRCPSQSSSRPAAMISQPPTPPTGQP	3582	P	4	4873		0.986106	0.00396962	48.088	45.95	48.088	0.85968	35082000	0.986106	NaN	NaN	48.088	NaN	NaN
Q6PKG0	650	Q6PKG0	Q6PKG0	La-related protein 1	LARP1	IDDRDVNKILIVTQTPHYMRRHPGGDRTGNH	3583	P	3	4873		1	0.0111801	71.555	64.19	71.555	-0.79834	92243000	1	NaN	NaN	71.555	NaN	NaN
Q6PKG0	590	Q6PKG0	Q6PKG0	La-related protein 1	LARP1	EESRFSHLTSLPQQLPSQQLMSKDQDEQEEL	3584	P	4	4873		0.998889	0.0202925	41.482	28.68	41.482	0.14287	42190000	0.998889	NaN	NaN	41.482	NaN	NaN
Q6PL18	416	Q6PL18	Q6PL18	ATPase family AAA domain-containing protein 2	ATAD2	YKDRMKIGASLADVDPMQLDSSVRFDSVGGL	3587	P	4	4874		1	2.29699e-05	80.79	70.083	51.617	0.11757	139170000	1	NaN	1	80.79	NaN	51.617
Q6R327	1105	Q6R327	Q6R327	Rapamycin-insensitive companion of mTOR	RICTOR	SSKLVKNRILNSLTLPNKKHRSSSDPKGGKL	3589	P	2	4880		1	0.0254489	92.062	73.751	92.062	-3.1182	0	NaN	NaN	1	NaN	NaN	92.062
Q6RI45	552	Q6RI45	Q6RI45	Bromodomain and WD repeat-containing protein 3	BRWD3	LLLFGFGCSKYYEKIPDQMFFHTDYRPLIRD	3590	P	5	4882		0.999389	0.0144868	48.112	41.647	48.112	-0.39942	22983000	0.999389	NaN	NaN	48.112	NaN	NaN
Q6UB35	945	Q6UB35	Q6UB35	Monofunctional C1-tetrahydrofolate synthase, mitochondrial	MTHFD1L	PISDVRASIGAGFIYPLVGTMSTMPGLPTRP	3591	P	3	4894		0.953644	0.00235705	42.015	37.699	42.015	-0.83133	43656000	0.953644	NaN	NaN	42.015	NaN	NaN
Q6UB35	664	Q6UB35	Q6UB35	Monofunctional C1-tetrahydrofolate synthase, mitochondrial	MTHFD1L	GVTGALTVLMKDAIKPNLMQTLEGTPVFVHA	3592	P	5	4894		0.999559	3.07556e-06	53.091	48.733	53.091	1.3359	6166100	NaN	NaN	0.999559	NaN	NaN	53.091
Q6UB35	477	Q6UB35	Q6UB35	Monofunctional C1-tetrahydrofolate synthase, mitochondrial	MTHFD1L	GVKGGAAGGGYAQVIPMEEFNLHLTGDIHAI	3593	P	3	4894		1	1.79104e-17	129	121.51	129	-0.022034	58957000	NaN	NaN	1	NaN	NaN	129
Q6UN15	435	Q6UN15	Q6UN15	Pre-mRNA 3'-end-processing factor FIP1	FIP1L1	SARAFPYGNVAFPHLPGSAPSWPSLVDTSKQ	3596	P	3	4897		0.550989	0.0115739	65.775	59.126	65.775	0.30697	14838000	0.550989	NaN	NaN	65.775	NaN	NaN
Q6UUV9	162	Q6UUV9	Q6UUV9	CREB-regulated transcription coactivator 1	CRTC1	RRTNSDSALHQSTMTPTQPESFSSGSQDVHQ	3600	P	5	4899		0.87878	1.30648e-05	65.587	60.582	65.587	-1.3688	113020000	0.874464	NaN	0.87878	58.398	NaN	65.587
Q6VN20	496	Q6VN20	Q6VN20	Ran-binding protein 10	RANBP10	HEDLQTDESSMDDRHPRRQLCGGNQAATERI	3606	P	4	4929		1	0.000987355	67.251	63.76	67.251	0.15703	10305000	NaN	NaN	1	NaN	NaN	67.251
Q6VY07	431	Q6VY07	Q6VY07	Phosphofurin acidic cluster sorting protein 1	PACS1	GSLNSKGSLGKDTTSPMELAALEKIKSTWIK	3607	P	4	4930		1	0.00102914	74.776	69.566	74.776	-0.1289	32069000	NaN	NaN	1	NaN	NaN	74.776
Q6WCQ1	325	Q6WCQ1	Q6WCQ1	Myosin phosphatase Rho-interacting protein	MPRIP	LDIEKAEHMETNAVGPSPSSDTRQGRSEKRA	3613	P	3	4932		1	0.0107484	47.222	42.152	47.222	-1.0591	32785000	NaN	NaN	1	NaN	NaN	47.222
Q6WCQ1	327	Q6WCQ1	Q6WCQ1	Myosin phosphatase Rho-interacting protein	MPRIP	IEKAEHMETNAVGPSPSSDTRQGRSEKRAFP	3614	P	3	4932		1	0.0107484	47.222	42.152	47.222	-1.0591	32785000	NaN	NaN	1	NaN	NaN	47.222
Q6WKZ4	64	Q6WKZ4	Q6WKZ4	Rab11 family-interacting protein 1	RAB11FIP1	KEKYATSVSERSLGAPVWREEATFELPSLLS	3616	P	4	4933		0.958016	2.85764e-12	86.081	77.535	86.081	-3.1267	31183000	NaN	NaN	0.958016	NaN	NaN	86.081
Q6WKZ4	250	Q6WKZ4	Q6WKZ4	Rab11 family-interacting protein 1	RAB11FIP1	MSVLPTSKPEKVLLRPGDFQSQWDEDDNEDE	3618	P	5	4933		1	0.00276748	41.83	40.168	41.83	-3.3694	19834000	1	NaN	NaN	41.83	NaN	NaN
Q6YN16	264	Q6YN16	Q6YN16	Hydroxysteroid dehydrogenase-like protein 2	HSDL2	LKEEGIENFDVYAIKPGHPLQPDFFLDEYPE	3621	P	3	4947		0.937104	0.0234083	49.089	34.628	49.089	-2.3765	137510000	NaN	NaN	0.937104	NaN	NaN	49.089
Q6YN16	278	Q6YN16	Q6YN16	Hydroxysteroid dehydrogenase-like protein 2	HSDL2	KPGHPLQPDFFLDEYPEAVSKKVESTGAVPE	3622	P	3	4947		0.99987	0.0234083	49.089	34.628	49.089	-2.3765	137510000	NaN	NaN	0.99987	NaN	NaN	49.089
Q6ZRI6	639	Q6ZRI6	Q6ZRI6	Uncharacterized protein C15orf39	C15orf39	EAPGLPGVPVTTDAMPRTNFHSSVAFMFRKF	3623	P	3	4974		0.97258	0.0236537	42.612	33.207	42.612	1.3517	32274000	NaN	NaN	0.97258	NaN	NaN	42.612
Q6ZRP7	459	Q6ZRP7	Q6ZRP7	Sulfhydryl oxidase 2	QSOX2	STHPDALVGTGFEDDPQAVLQTMRRYVHTFF	3624	P	5	4975		0.99979	0.00105299	45.325	40.881	45.325	-1.2817	162390000	0.99979	NaN	NaN	45.325	NaN	NaN
Q6ZT21	201	Q6ZT21	Q6ZT21	Transmembrane protein with metallophosphoesterase domain	TMPPE	QPPAVKTVEVPIHQLPASMNNLKIVLLSDIH	3626	P	3	4992		0.998514	0.0193893	53.328	43.271	53.328	1.5586	165240000	0.997467	NaN	0.998514	49.993	NaN	53.328
Q6ZT62;Q9Y3L3	271;263	Q6ZT62;Q9Y3L3	Q9Y3L3	SH3 domain-binding protein 1	SH3BP1	ALAELRENHGQADHSPSMTATHFPRVYGVSL	3627	P	6	4993;9546		0.994784	3.86504e-05	54.003	46.447	54.003	0.92097	31360000	NaN	NaN	0.994784	NaN	NaN	54.003
Q6ZVM7	152	Q6ZVM7	Q6ZVM7	TOM1-like protein 2	TOM1L2	VVHIYEELKRKGVEFPMADLDALSPIHTPQR	3628	P	3	5010		1	8.62607e-09	123.99	116.96	123.99	-0.068969	120400000	0.999999	NaN	1	107.89	NaN	123.99
Q71RC2	181	Q71RC2	Q71RC2	La-related protein 4	LARP4	LTTDPDLILEVLRSSPMVQVDEKGEKVRPSH	3636	P	3	5041		1	0.00470949	82.202	77.204	82.202	0.12886	35022000	1	NaN	NaN	82.202	NaN	NaN
Q765P7	607	Q765P7	Q765P7	MTSS1-like protein	MTSS1L	PVKTPTVPDSPGYMGPTRAGSEECVFYTDET	3643	P	2	5050		0.660969	0.0233406	98.943	89.621	98.943	-0.36948	19176000	NaN	NaN	0.660969	NaN	NaN	98.943
Q7KZ85	1704	Q7KZ85	Q7KZ85	Transcription elongation factor SPT6	SUPT6H	RRKQKQRLTPRPSPSPMIESTPMSIAGDATP	3648	P	3	5058		0.61259	0.00311029	54.53	54.53	54.53	-2.2813	39671000	0.61259	NaN	NaN	54.53	NaN	NaN
Q7KZ85	1710	Q7KZ85	Q7KZ85	Transcription elongation factor SPT6	SUPT6H	RLTPRPSPSPMIESTPMSIAGDATPLLDEMD	3649	P	3	5058		0.982874	0.00311029	54.53	54.53	54.53	-2.2813	39671000	0.982874	NaN	NaN	54.53	NaN	NaN
Q7KZF4	74	Q7KZF4	Q7KZF4	Staphylococcal nuclease domain-containing protein 1	SND1	LARRAAATQPDAKDTPDEPWAFPAREFLRKK	3650	P	3	5059		0.928543	0.00212533	74.047	66.055	63.447	-0.69803	123110000	0.574571	NaN	0.928543	74.047	NaN	63.447
Q7L014	552	Q7L014	Q7L014	Probable ATP-dependent RNA helicase DDX46	DDX46	MGFEPQVMRIVDNVRPDRQTVMFSATFPRAM	3657	P	4	5062		0.999822	0.00291205	66.386	58.394	66.386	-0.34516	860700000	NaN	NaN	0.999822	NaN	NaN	66.386
Q7L0Y3	337	Q7L0Y3	Q7L0Y3	Mitochondrial ribonuclease P protein 1	TRMT10C	SLAKAKRLNLATECLPLDKYLQWEIGNKNLT	3660	P	3	5066		1	0.00367107	64.315	59.871	64.315	-3.3461	0	1	NaN	NaN	64.315	NaN	NaN
Q7L0Y3	295	Q7L0Y3	Q7L0Y3	Mitochondrial ribonuclease P protein 1	TRMT10C	DLFPKDSIIYLTADSPNVMTTFRHDKVYVIG	3661	P	5	5066		0.999965	0.000541327	51.783	46.123	51.783	-0.75826	104900000	0.999965	NaN	NaN	51.783	NaN	NaN
Q7L1T6	84	Q7L1T6	Q7L1T6	Cytochrome b5 reductase 4	CYB5R4	DDCWICIRGFVYNVSPYMEYHPGGEDELMRA	3662	P	3	5068		0.965667	0.000326231	73.405	59.95	73.405	-1.3335	97876000	NaN	0	0.965667	NaN	NaN	73.405
Q7L1V2	57	Q7L1V2	Q7L1V2	Vacuolar fusion protein MON1 homolog B	MON1B	EDEGLEETGSKDKDQPPSPSPPPQSEALSST	3667	P	3	5069		0.897211	0.0158568	40.756	36.952	40.756	-3.8159	0	NaN	NaN	0.897211	NaN	NaN	40.756
Q7L1V2	58	Q7L1V2	Q7L1V2	Vacuolar fusion protein MON1 homolog B	MON1B	DEGLEETGSKDKDQPPSPSPPPQSEALSSTS	3668	P	3	5069		0.897211	0.0158568	40.756	36.952	40.756	-3.8159	0	NaN	NaN	0.897211	NaN	NaN	40.756
Q7L1V2	60	Q7L1V2	Q7L1V2	Vacuolar fusion protein MON1 homolog B	MON1B	GLEETGSKDKDQPPSPSPPPQSEALSSTSRL	3669	P	3	5069		0.897211	0.0158568	40.756	36.952	40.756	-3.8159	0	NaN	NaN	0.897211	NaN	NaN	40.756
Q7L1V2	62	Q7L1V2	Q7L1V2	Vacuolar fusion protein MON1 homolog B	MON1B	EETGSKDKDQPPSPSPPPQSEALSSTSRLWS	3670	P	3	5069		0.897211	0.0158568	40.756	36.952	40.756	-3.8159	0	NaN	NaN	0.897211	NaN	NaN	40.756
Q7L1V2	63	Q7L1V2	Q7L1V2	Vacuolar fusion protein MON1 homolog B	MON1B	ETGSKDKDQPPSPSPPPQSEALSSTSRLWSP	3671	P	3	5069		0.897211	0.0158568	40.756	36.952	40.756	-3.8159	0	NaN	NaN	0.897211	NaN	NaN	40.756
Q7L1W4	252	Q7L1W4	Q7L1W4	Volume-regulated anion channel subunit LRRC8D	LRRC8D	HVSTSSDEGSPSASTPMINKTGFKFSAEKPV	3672	P	3	5070		0.999611	8.30555e-06	104.88	101.28	104.88	-0.015875	14194000	NaN	NaN	0.999611	NaN	NaN	104.88
Q7L273	381	Q7L273	Q7L273	BTB/POZ domain-containing protein KCTD9	KCTD9	RGSNVKGAIFEEMLTPLHMSQSVR_______	3673	P	3	5073		1	0.0192361	49.224	44.419	49.224	-0.80582	94165000	NaN	NaN	1	NaN	NaN	49.224
Q7L2E3	156	Q7L2E3	Q7L2E3	Putative ATP-dependent RNA helicase DHX30	DHX30	VLADRFGSPADSWWRPEPTMPPTSWRQLNPE	3674	P	3	5074		0.540818	3.06099e-05	94.885	90.934	94.885	-0.14248	270700000	NaN	NaN	0.540818	NaN	NaN	94.885
Q7L2E3	158	Q7L2E3	Q7L2E3	Putative ATP-dependent RNA helicase DHX30	DHX30	ADRFGSPADSWWRPEPTMPPTSWRQLNPESI	3675	P	3	5074		0.745417	0.000227856	85.737	82.814	63.184	-0.095622	152500000	0.745417	NaN	0.692666	63.184	NaN	85.737
Q7L2J0	238	Q7L2J0	Q7L2J0	7SK snRNA methylphosphate capping enzyme	MEPCE	GRDPVEILIPKDITDPLSLNTCTDEGHVVLA	3678	P	3	5076		0.999874	0.00487981	52.061	47.515	52.061	-0.3185	9149400	0.999874	NaN	NaN	52.061	NaN	NaN
Q7L5N7	338	Q7L5N7	Q7L5N7	Lysophosphatidylcholine acyltransferase 2	LPCAT2	YEDCRLMISAGQLTLPMEAGLVEFTKISRKL	3680	P	2	5092		1	3.7947e-10	137.75	120.98	137.75	0.72769	16197000	NaN	NaN	1	NaN	NaN	137.75
Q7L9L4;Q9H8S9	133;133	Q7L9L4;Q9H8S9	Q7L9L4	MOB kinase activator 1B;MOB kinase activator 1A	MOB1B;MOB1A	LMTWVQDQLDDETLFPSKIGVPFPKNFMSVA	3685	P	2	5105;8104		1	0.00707911	56.122	44.354	56.122	-2.4912	0	NaN	NaN	1	NaN	NaN	56.122
Q7LBC6	1642	Q7LBC6	Q7LBC6	Lysine-specific demethylase 3B	KDM3B	ELLRKVGEEQGQENPPDHDPIHDQSWYLDQT	3686	P	5	5106		0.857246	3.97296e-05	68.444	54.4	68.444	0.95824	38233000	0.857246	NaN	NaN	68.444	NaN	NaN
Q7LBC6	1646	Q7LBC6	Q7LBC6	Lysine-specific demethylase 3B	KDM3B	KVGEEQGQENPPDHDPIHDQSWYLDQTLRKR	3687	P	5	5106		0.857246	3.97296e-05	68.444	54.4	68.444	0.95824	38233000	0.857246	NaN	NaN	68.444	NaN	NaN
Q7Z2W4	209	Q7Z2W4	Q7Z2W4	Zinc finger CCCH-type antiviral protein 1	ZC3HAV1	MDRKVLAIMREHGLNPDVVQNIQDICNSKHM	3692	P	4	5128		1	0.00184776	56.625	38.681	56.625	0.61193	16201000	NaN	NaN	1	NaN	NaN	56.625
Q7Z3B4	326	Q7Z3B4	Q7Z3B4	Nucleoporin p54	NUP54	QAKVDNPDSEKLIPVPMVGFKELLRRLKVQD	3697	P	4	5140		0.987913	0.000387976	73.981	66.704	73.981	0.22023	136730000	NaN	NaN	0.987913	NaN	NaN	73.981
Q7Z3C6	426	Q7Z3C6	Q7Z3C6	Autophagy-related protein 9A	ATG9A	VTLLGVTVTVCRSFIPDQHMVFCPEQLLRVI	3698	P	3	5141		0.99901	0.0251402	55.864	26.787	55.864	-1.162	0	NaN	NaN	0.99901	NaN	NaN	55.864
Q7Z3K3	585	Q7Z3K3	Q7Z3K3	Pogo transposable element with ZNF domain	POGZ	ESEPLFLQHMKDTHKPGEMPYVCQVCQYRSS	3699	P	4	5148		0.966685	0.00283767	62.94	54.47	62.94	-1.5615	64494000	NaN	NaN	0.966685	NaN	NaN	62.94
Q7Z3K3	1183	Q7Z3K3	Q7Z3K3	Pogo transposable element with ZNF domain	POGZ	TVLPTLVFYRGQMDQPANMPDSILLEAKESG	3700	P	2	5148		0.824175	0.033273	54.199	54.199	54.199	-1.9622	0	0.824175	NaN	NaN	54.199	NaN	NaN
Q7Z3K3	436	Q7Z3K3	Q7Z3K3	Pogo transposable element with ZNF domain	POGZ	AKPPSPEKTAPVASTPSSTPIPALSPPTKVP	3701	P	4	5148		0.828756	0.00042684	43.384	33.502	43.384	-1.421	69550000	0.828756	NaN	0.537562	43.384	NaN	40.697
Q7Z3K3	440	Q7Z3K3	Q7Z3K3	Pogo transposable element with ZNF domain	POGZ	SPEKTAPVASTPSSTPIPALSPPTKVPEPNE	3702	P	4	5148		0.744119	0.00042684	43.384	33.502	40.697	-2.3259	69550000	0.716758	NaN	0.744119	43.384	NaN	40.697
Q7Z3K3	442	Q7Z3K3	Q7Z3K3	Pogo transposable element with ZNF domain	POGZ	EKTAPVASTPSSTPIPALSPPTKVPEPNENV	3703	P	4	5148		0.847278	0.00042684	43.384	33.502	40.697	-2.3259	69550000	0.800469	NaN	0.847278	43.384	NaN	40.697
Q7Z3K3	446	Q7Z3K3	Q7Z3K3	Pogo transposable element with ZNF domain	POGZ	PVASTPSSTPIPALSPPTKVPEPNENVGDAV	3704	P	4	5148		0.847278	0.00042684	43.384	33.502	40.697	-2.3259	69550000	0.800469	NaN	0.847278	43.384	NaN	40.697
Q7Z3K3	447	Q7Z3K3	Q7Z3K3	Pogo transposable element with ZNF domain	POGZ	VASTPSSTPIPALSPPTKVPEPNENVGDAVQ	3705	P	4	5148		0.847278	0.00042684	43.384	33.502	40.697	-2.3259	69550000	0.800469	NaN	0.847278	43.384	NaN	40.697
Q7Z3T8	57	Q7Z3T8	Q7Z3T8	Zinc finger FYVE domain-containing protein 16	ZFYVE16	SVSSELASSQRTSLLPKDQECVNSCASSETS	3707	P	3	5151		1	0.0190972	47.429	42.109	47.429	-0.63588	8188000	1	NaN	NaN	47.429	NaN	NaN
Q7Z460	785	Q7Z460	Q7Z460	CLIP-associating protein 1	CLASP1	FPPLDRFGLGQPGRIPGSVNAMRVLSTSTDL	3712	P	3	5161		0.978267	0.0323894	64.04	57.469	64.04	-0.90091	234420000	0.978267	NaN	NaN	64.04	NaN	NaN
Q7Z460	818	Q7Z460	Q7Z460	CLIP-associating protein 1	CLASP1	AVADALKKPVRRRYEPYGMYSDDDANSDASS	3713	P	3	5161		1	0.0226476	40.404	40.404	40.404	-2.4419	2859900	NaN	NaN	1	NaN	NaN	40.404
Q7Z5G4	3	Q7Z5G4	Q7Z5G4	Golgin subfamily A member 7	GOLGA7	_____________MRPQQAPVSGKVFIQRDY	3716	P	2	5178		0.999994	0.00305621	91.087	77.318	91.087	-2.5558	14513000	NaN	NaN	0.999994	NaN	NaN	91.087
Q7Z5L9	424	Q7Z5L9	Q7Z5L9	Interferon regulatory factor 2-binding protein 2	IRF2BP2	SNRTTPPEAAQNGQSPMAALILVADNAGGSH	3723	P	5	5183		0.613832	0.000153425	41.267	37.984	41.267	-0.71209	11602000	NaN	NaN	0.613832	NaN	NaN	41.267
Q7Z5N4	723	Q7Z5N4	Q7Z5N4	Protein sidekick-1	SDK1	SENNSPWKVHLSNVGPEMTGVTVSGLTPART	3724	P	3	5184		0.999993	0.00120928	63.726	60.389	63.726	-0.41639	23163000	0.999993	NaN	NaN	63.726	NaN	NaN
Q7Z6K5	21	Q7Z6K5	Q7Z6K5	Arpin	ARPIN	HDGALRNKAVQSVRLPGAWDPAAHQGGNGVL	3728	P	3	5201		1	0.00275882	88.001	69.899	88.001	1.0468	36884000	1	NaN	NaN	88.001	NaN	NaN
Q7Z6K5	26	Q7Z6K5	Q7Z6K5	Arpin	ARPIN	RNKAVQSVRLPGAWDPAAHQGGNGVLLEGEL	3729	P	3	5201		1	0.00275882	88.001	69.899	88.001	1.0468	36884000	1	NaN	NaN	88.001	NaN	NaN
Q7Z6M1	183	Q7Z6M1	Q7Z6M1	Rab9 effector protein with kelch motifs	RABEPK	TKLHVFDANTLTWSQPETLGNPPSPRHGHVM	3730	P	3	5203		0.999971	4.42272e-06	90.193	65.966	90.193	4.1442	50925000	0.999971	NaN	0.905461	90.193	NaN	55.366
Q7Z6Z7	3055	Q7Z6Z7	Q7Z6Z7	E3 ubiquitin-protein ligase HUWE1	HUWE1	EQQRRELAQNASSDTPMDPVTFIQTLPSDLR	3731	P	3	5207		0.995992	3.68802e-19	119.32	114.11	119.32	-0.1463	39509000	0.995992	NaN	NaN	119.32	NaN	NaN
Q7Z6Z7	4076	Q7Z6Z7	Q7Z6Z7	E3 ubiquitin-protein ligase HUWE1	HUWE1	LLREWYMIISREMFNPMYALFRTSPGDRVTY	3732	P	2	5207		1	0.00972818	90.657	86.358	90.657	-0.46875	102240000	NaN	NaN	1	NaN	NaN	90.657
Q7Z6Z7	3430	Q7Z6Z7	Q7Z6Z7	E3 ubiquitin-protein ligase HUWE1	HUWE1	AGGEGETSPYSLEASPLGQLMNMLSHPVIRR	3735	P	3	5207		0.981718	7.8544e-05	50.261	50.261	50.261	-0.17546	13601000	0.981718	NaN	NaN	50.261	NaN	NaN
Q7Z6Z7	1192	Q7Z6Z7	Q7Z6Z7	E3 ubiquitin-protein ligase HUWE1	HUWE1	GGKVPVSEGLEHSDLPDGTGEFLDAWLMLVE	3737	P	3	5207		0.998635	0.016134	44.161	38.56	44.161	-3.4639	0	0.998635	NaN	NaN	44.161	NaN	NaN
Q7Z7H8	66	Q7Z7H8	Q7Z7H8	39S ribosomal protein L10, mitochondrial	MRPL10	TEYIPPKPAIHPSCLPSPPSPPQEEIGLIRL	3740	P	3	5220		0.756577	0.0285187	44.312	36.778	44.312	0.58704	18037000	0.756577	NaN	NaN	44.312	NaN	NaN
Q7Z7K6	94	Q7Z7K6	Q7Z7K6	Centromere protein V	CENPV	GEPPPPELALLPPPPPPPPTPATPTSSASNL	3742	P	4	5222		0.605856	1.21041e-08	63.189	59.414	63.189	-2.623	31682000	0.605856	NaN	NaN	63.189	NaN	NaN
Q7Z7K6	95	Q7Z7K6	Q7Z7K6	Centromere protein V	CENPV	EPPPPELALLPPPPPPPPTPATPTSSASNLD	3743	P	4	5222		0.604203	1.21041e-08	63.189	59.414	63.189	-2.623	31682000	0.604203	NaN	NaN	63.189	NaN	NaN
Q7Z7K6	96	Q7Z7K6	Q7Z7K6	Centromere protein V	CENPV	PPPPELALLPPPPPPPPTPATPTSSASNLDL	3744	P	4	5222		0.604203	1.21041e-08	63.189	59.414	63.189	-2.623	31682000	0.604203	NaN	NaN	63.189	NaN	NaN
Q7Z7K6	97	Q7Z7K6	Q7Z7K6	Centromere protein V	CENPV	PPPELALLPPPPPPPPTPATPTSSASNLDLG	3745	P	4	5222		0.604203	1.21041e-08	63.189	59.414	63.189	-2.623	31682000	0.604203	NaN	NaN	63.189	NaN	NaN
Q7Z7K6	99	Q7Z7K6	Q7Z7K6	Centromere protein V	CENPV	PELALLPPPPPPPPTPATPTSSASNLDLGEQ	3746	P	4	5222		0.604203	1.21041e-08	63.189	59.414	63.189	-2.623	31682000	0.604203	NaN	NaN	63.189	NaN	NaN
Q7Z7L1	267	Q7Z7L1	Q7Z7L1	Schlafen family member 11	SLFN11	DKSREVLGCAKENVDPDSLRRKIEQAIYKLP	3747	P	2	5223		1	0.0311593	70.977	29.576	70.977	-0.6072	0	NaN	NaN	1	NaN	NaN	70.977
Q86TB9	61	Q86TB9	Q86TB9	Protein PAT1 homolog 1	PATL1	WQEAHERLAELEEKLPVAVNEQTGNGERDEM	3750	P	4	5245		1	5.18782e-07	81.566	73.501	81.566	-1.2108	15393000	NaN	NaN	1	NaN	NaN	81.566
Q86TB9	102	Q86TB9	Q86TB9	Protein PAT1 homolog 1	PATL1	AERLSKMVIENELEDPAIMRAVQTRPVLQPQ	3751	P	2	5245		1	0.0309926	68.893	53.137	68.893	-0.66636	9477600	NaN	NaN	1	NaN	NaN	68.893
Q86UK7	605	Q86UK7	Q86UK7	Zinc finger protein 598	ZNF598	KKKVGSEKPGTTLPQPPPATCPPGALQAPEA	3765	P	3	5278		0.542433	0.00208185	58.498	52.799	58.498	2.2838	0	0.542433	NaN	NaN	58.498	NaN	NaN
Q86UK7	606	Q86UK7	Q86UK7	Zinc finger protein 598	ZNF598	KKVGSEKPGTTLPQPPPATCPPGALQAPEAP	3766	P	3	5278		0.542433	0.00208185	58.498	52.799	58.498	2.2838	0	0.542433	NaN	NaN	58.498	NaN	NaN
Q86UK7	607	Q86UK7	Q86UK7	Zinc finger protein 598	ZNF598	KVGSEKPGTTLPQPPPATCPPGALQAPEAPA	3767	P	3	5278		0.542433	0.00208185	58.498	52.799	58.498	2.2838	0	0.542433	NaN	NaN	58.498	NaN	NaN
Q86UU0	803	Q86UU0	Q86UU0	B-cell CLL/lymphoma 9-like protein	BCL9L	MTPQQQMLMSQKMRGPGDLMGPQGLSPEEMA	3768	P	3	5287		0.991255	0.00125491	70.414	70.414	70.414	-0.93833	41214000	0.618028	NaN	0.991255	46.971	NaN	70.414
Q86UU0	814	Q86UU0	Q86UU0	B-cell CLL/lymphoma 9-like protein	BCL9L	KMRGPGDLMGPQGLSPEEMARVRAQNSSGVM	3769	P	3	5287		0.993205	0.00125491	70.414	70.414	70.414	-0.93833	24024000	NaN	NaN	0.993205	NaN	NaN	70.414
Q86V81	170	Q86V81	Q86V81	THO complex subunit 4	ALYREF	RKADALKAMKQYNGVPLDGRPMNIQLVTSQI	3771	P	4	5301		0.721393	0.0149133	42.254	29.94	42.254	-0.3562	40642000	0.721393	NaN	NaN	42.254	NaN	NaN
Q86VP6	1070	Q86VP6	Q86VP6	Cullin-associated NEDD8-dissociated protein 1	CAND1	ETKVRKELIREVEMGPFKHTVDDGLDIRKAA	3776	P	4	5317		1	0.0161172	55.267	46.325	55.267	0.10246	114340000	1	NaN	NaN	55.267	NaN	NaN
Q86W56	303	Q86W56	Q86W56	Poly(ADP-ribose) glycohydrolase	PARG	LGNSPPFEKESEPESPMDVDNSKNSCQDSEA	3778	P	2	5334		0.999996	0.0198135	107.11	101.33	107.11	-3.1267	0	NaN	NaN	0.999996	NaN	NaN	107.11
Q86WB0	4	Q86WB0	Q86WB0	Nuclear-interacting partner of ALK	ZC3HC1	____________MAAPCEGQAFAVGVEKNWG	3783	P	2	5340		1	0.00375908	68.44	55.864	68.44	-3.4987	7613900	1	NaN	NaN	68.44	NaN	NaN
Q86X55	287	Q86X55	Q86X55	Histone-arginine methyltransferase CARM1	CARM1	YLHAKKYLKPSGNMFPTIGDVHLAPFTDEQL	3791	P	3	5364		0.835246	6.12093e-07	65.893	65.893	56.252	0.57528	52857000	0.835246	0	0.528478	56.252	NaN	65.893
Q86X83	169	Q86X83	Q86X83	COMM domain-containing protein 2	COMMD2	LNQNGDHNTKVLQTDPATLLHLVQQLEQALE	3792	P	6	5366		1	2.20609e-05	73.655	69.784	73.655	-1.1924	2010300	NaN	NaN	1	NaN	NaN	73.655
Q86XL3	489	Q86XL3	Q86XL3	Ankyrin repeat and LEM domain-containing protein 2	ANKLE2	GHYYVPLLRAEETSSPVIGELWSPDQTAEAS	3795	P	3	5374		1	0.0279812	61.37	50.07	61.37	0.17208	12279000	1	NaN	NaN	61.37	NaN	NaN
Q86XL3	497	Q86XL3	Q86XL3	Ankyrin repeat and LEM domain-containing protein 2	ANKLE2	RAEETSSPVIGELWSPDQTAEASHVSRYGGS	3796	P	3	5374		1	0.0279812	61.37	50.07	61.37	0.17208	12279000	1	NaN	NaN	61.37	NaN	NaN
Q86XL3	58	Q86XL3	Q86XL3	Ankyrin repeat and LEM domain-containing protein 2	ANKLE2	GRSGTPVPPPSAAAAPASGEMTMDALLARLK	3797	P	3	5374		0.776967	0.0199829	45.941	45.941	45.941	0.82647	12012000	NaN	NaN	0.776967	NaN	NaN	45.941
Q86XP3	664	Q86XP3	Q86XP3	ATP-dependent RNA helicase DDX42	DDX42	KKLNIGGGGLGYRERPGLGSENMDRGNNNVM	3798	P	4	5379		1	0.00215773	57.945	55.505	44.625	0.17422	103390000	1	NaN	1	46.403	NaN	57.945
Q86Y13	101	Q86Y13	Q86Y13	E3 ubiquitin-protein ligase DZIP3	DZIP3	QREVAANSQNGEEIVPALTLRFLITQLEAAL	3800	P	3	5385		1	0.0252093	49.463	34.915	49.463	-0.095102	46945000	1	NaN	NaN	49.463	NaN	NaN
Q86YP4	414	Q86YP4	Q86YP4	Transcriptional repressor p66-alpha	GATAD2A	ETQGRMSAATVLSREPYMCAQCKTDFTCRWR	3806	P	3	5406		1	0.0205058	68.861	59.203	68.861	-0.69972	43355000	1	NaN	NaN	68.861	NaN	NaN
Q8IV38	175	Q8IV38	Q8IV38	Ankyrin repeat and MYND domain-containing protein 2	ANKMY2	LAGPLHKIITTTNLHPVKIVMLVNENPLLTE	3811	P	4	5442		0.976988	0.00064189	50.492	45.915	50.492	-0.70083	49563000	NaN	NaN	0.976988	NaN	NaN	50.492
Q8IWB9	859	Q8IWB9	Q8IWB9	Testis-expressed sequence 2 protein	TEX2	LVSKKIQMKLSKIKLPYFMNELTLTELDMGV	3820	P	3	5475		0.999252	0.000249836	74.584	74.584	74.062	0.71674	163520000	0.999252	NaN	0.995807	74.062	NaN	74.584
Q8IWI9	163	Q8IWI9	Q8IWI9	MAX gene-associated protein	MGA	AEPHVLGRVFIHPESPSTGHYWMHQPVSFYK	3825	P	5	5483		0.965758	0.00316932	54.672	48.642	54.672	-0.13588	72168000	0.965758	NaN	NaN	54.672	NaN	NaN
Q8IWV8	790	Q8IWV8	Q8IWV8	E3 ubiquitin-protein ligase UBR2	UBR2	TDEIKREIIHQLSIKPMAHSELVKSLPEDEN	3827	P	4	5499		1	0.0266609	48.112	38.948	48.112	0.080944	139480000	NaN	NaN	1	NaN	NaN	48.112
Q8IWV8	967	Q8IWV8	Q8IWV8	E3 ubiquitin-protein ligase UBR2	UBR2	FTQKISKPGEAPKNSPSILAMLETLQNAPYL	3831	P	4	5499		0.998724	0.0078643	67.778	61.683	67.778	0.048347	126410000	0.994858	NaN	0.998724	43.732	NaN	67.778
Q8IWZ3	538	Q8IWZ3	Q8IWZ3	Ankyrin repeat and KH domain-containing protein 1	ANKHD1	FLIKAGADIELGCSTPLMEASQEGHLELVKY	3836	P	3	5505		1	0.00230665	50.783	44.349	50.783	-0.93022	5454700	1	NaN	NaN	50.783	NaN	NaN
Q8IWZ3	474	Q8IWZ3	Q8IWZ3	Ankyrin repeat and KH domain-containing protein 1	ANKHD1	ERGANLEEVNDEGYTPLMEAAREGHEEMVAL	3837	P	2	5505		1	3.00581e-05	130.24	117.04	130.24	-0.34462	23792000	1	NaN	NaN	130.24	NaN	NaN
Q8IX01	551	Q8IX01	Q8IX01	SURP and G-patch domain-containing protein 2	SUGP2	VSSGCPLQVKKAEPEPMREEEKMIPPTKPEI	3838	P	3	5508		0.999581	0.0132996	115.34	51.869	115.34	0.071596	48172000	0.999581	NaN	NaN	115.34	NaN	NaN
Q8IX03	798	Q8IX03	Q8IX03	Protein KIBRA	WWC1	LLSYKYLKKQSRELKPVGVMAPASGPASTDA	3839	P	3	5509		0.865753	0.000574284	103.43	81.03	103.43	0.53568	18505000	0.865753	NaN	NaN	103.43	NaN	NaN
Q8IXJ9	28	Q8IXJ9	Q8IXJ9	Putative Polycomb group protein ASXL1	ASXL1	WAEAARLVLENYSDAPMTPKQILQVIEAEGL	3843	P	2	5522		0.994735	0.000529816	164.64	131.26	164.64	0.42675	17590000	0.994735	NaN	NaN	164.64	NaN	NaN
Q8IXM2	31	Q8IXM2	Q8IXM2	Chromatin complexes subunit BAP18	BAP18	GAAFTKLGELTMQLHPVADSSPAGAKWTETE	3847	P	3	5526		0.998369	0.0270692	48.315	40.229	48.315	0.49673	17515000	0.998369	NaN	NaN	48.315	NaN	NaN
Q8IY67	248	Q8IY67	Q8IY67	Ribonucleoprotein PTB-binding 1	RAVER1	NDVDALCRALSAVHSPTFCQLACGQDGQLKG	3860	P	3	5554		1	0.0325795	44.729	41.763	44.729	-0.57402	8069700	1	NaN	NaN	44.729	NaN	NaN
Q8IY81	120	Q8IY81	Q8IY81	pre-rRNA processing protein FTSJ3	FTSJ3	ELKTWKVDVVLNDGAPNVGASWVHDAYSQAH	3861	P	3	5555		1	0.00028607	46.31	41.596	46.31	-1.4396	0	1	NaN	NaN	46.31	NaN	NaN
Q8IYU2	24	Q8IYU2	Q8IYU2	E3 ubiquitin-protein ligase HACE1	HACE1	NRLTRSLRRARTVELPEDNETAVYTLMPMVM	3869	P	3	5582		0.820711	0.011423	43.162	43.162	43.162	-0.18633	23715000	0.820711	NaN	NaN	43.162	NaN	NaN
Q8IZ21	486	Q8IZ21	Q8IZ21	Phosphatase and actin regulator 4	PHACTR4	MLKVPDDEEEEEQTCPSTFSEEMTPTSVIPK	3873	P	3	5589		0.982955	0.00112186	56.625	54.857	56.625	0.32281	6743800	NaN	NaN	0.982955	NaN	NaN	56.625
Q8IZL8	742	Q8IZL8	Q8IZL8	Proline-, glutamic acid- and leucine-rich protein 1	PELP1	PENHRAGSNEDPILAPSGTPPPTIPPDETFG	3874	P	2	5603		0.873001	0.00565776	62.94	55.231	58.01	-2.0507	59016000	0.873001	NaN	NaN	62.94	NaN	NaN
Q8IZL8	640	Q8IZL8	Q8IZL8	Proline-, glutamic acid- and leucine-rich protein 1	PELP1	VTCAALTHPRVPPLQPMGPTCPTPAPVPPPE	3882	P	2	5603		0.990882	0.00990582	107.07	95.6	98.507	-0.97092	19010000	0.990882	NaN	0.987884	98.507	NaN	107.07
Q8IZL8	643	Q8IZL8	Q8IZL8	Proline-, glutamic acid- and leucine-rich protein 1	PELP1	AALTHPRVPPLQPMGPTCPTPAPVPPPEAPS	3883	P	3	5603		0.522016	0.000110935	84.404	77.681	84.404	-0.38351	38154000	0.522016	NaN	NaN	84.404	NaN	NaN
Q8IZL8	1083	Q8IZL8	Q8IZL8	Proline-, glutamic acid- and leucine-rich protein 1	PELP1	ETEDGSDKVQPPPETPAEEEMETETEAEALQ	3887	P	3	5603		0.587403	2.64752e-05	95.123	91.923	95.123	-0.51226	49033000	NaN	0	0.587403	NaN	NaN	95.123
Q8N108	436	Q8N108	Q8N108	Mesoderm induction early response protein 1	MIER1	VEGLHINGPTGGNKKPLHADMDTNGYETDNL	3892	P	4	5626		0.999995	0.00513131	53.779	51.13	53.779	0.48886	9654200	NaN	NaN	0.999995	NaN	NaN	53.779
Q8N163	692	Q8N163	Q8N163	Cell cycle and apoptosis regulator protein 2	CCAR2	ASNQSEMEFSSLQDMPKELDPSAVLPLDCLL	3896	P	3	5636		1	0.00949442	50.883	47.22	50.883	1.0676	27181000	NaN	NaN	1	NaN	NaN	50.883
Q8N1F7	203	Q8N1F7	Q8N1F7	Nuclear pore complex protein Nup93	NUP93	QIYIYNEKIVNGHLQPNLVDLCASVAELDDK	3898	P	3	5644		1	0.0301494	43.841	40	43.841	1.2847	4640100	1	NaN	NaN	43.841	NaN	NaN
Q8N1F8	414	Q8N1F8	Q8N1F8	Serine/threonine-protein kinase 11-interacting protein	STK11IP	RTLNPSPAGWFVQQHPELELMSSFRERFGRN	3899	P	4	5645		0.999979	0.0126067	54.259	47.683	54.259	-0.10457	16853000	NaN	NaN	0.999979	NaN	NaN	54.259
Q8N201	666	Q8N201	Q8N201	Integrator complex subunit 1	INTS1	DTLMRILVIGLSRELPLGPADAMELADHLVK	3901	P	4	5655		0.53998	0.00820678	56.817	51.724	56.817	0.2977	37025000	NaN	NaN	0.53998	NaN	NaN	56.817
Q8N257	2	Q8N257	Q8N257	Histone H2B type 3-B	HIST3H2BB	______________MPDPSKSAPAPKKGSKK	3902	P	2	5656		0.999855	0.0156274	45.368	7.6405	45.368	-0.18969	32029000	0.999855	NaN	NaN	45.368	NaN	NaN
Q8N257	4	Q8N257	Q8N257	Histone H2B type 3-B	HIST3H2BB	____________MPDPSKSAPAPKKGSKKAV	3903	P	2	5656		0.999855	0.0156274	45.368	7.6405	45.368	-0.18969	32029000	0.999855	NaN	NaN	45.368	NaN	NaN
Q8N257	9	Q8N257	Q8N257	Histone H2B type 3-B	HIST3H2BB	_______MPDPSKSAPAPKKGSKKAVTKAQK	3904	P	2	5656		0.500145	0.0156274	45.368	7.6405	45.368	-0.18969	32029000	0.500145	NaN	NaN	45.368	NaN	NaN
Q8N257	11	Q8N257	Q8N257	Histone H2B type 3-B	HIST3H2BB	_____MPDPSKSAPAPKKGSKKAVTKAQKKD	3905	P	2	5656		0.500145	0.0156274	45.368	7.6405	45.368	-0.18969	32029000	0.500145	NaN	NaN	45.368	NaN	NaN
Q8N2W9	137	Q8N2W9	Q8N2W9	E3 SUMO-protein ligase PIAS4	PIAS4	LPAKTLKPEVRLVKLPFFNMLDELLKPTELV	3907	P	4	5668		0.991716	0.00881079	49.25	42.955	49.25	0.2124	23568000	0.991716	NaN	NaN	49.25	NaN	NaN
Q8N3U4	1143	Q8N3U4	Q8N3U4	Cohesin subunit SA-2	STAG2	EPKRLRPEDSFMSVYPMQTEHHQTPLDYNRR	3910	P	5	5689		0.998292	0.000564017	71.974	71.974	50.029	-0.60518	262010000	0.998292	NaN	0.851224	71.974	NaN	61.415
Q8N3U4	1152	Q8N3U4	Q8N3U4	Cohesin subunit SA-2	STAG2	SFMSVYPMQTEHHQTPLDYNRRGTSLMEDDE	3911	P	5	5689		0.696029	0.00271614	48.867	28.133	48.867	-0.68459	103480000	0.696029	NaN	NaN	48.867	NaN	NaN
Q8N4Q0	30	Q8N4Q0	Q8N4Q0	Zinc-binding alcohol dehydrogenase domain-containing protein 2	ZADH2	MSYARHFLDFQGSAIPQAMQKLVVTRLSPNF	3913	P	3	5709		1	0.0228012	53.403	48.855	53.403	0.069884	63153000	1	NaN	NaN	53.403	NaN	NaN
Q8N806	356	Q8N806	Q8N806	Putative E3 ubiquitin-protein ligase UBR7	UBR7	YENKGKIAQATDRSDPLMDTLSSMNRVQQVE	3922	P	3	5791		1	0.00868343	49.34	41.153	49.34	-0.8603	0	1	NaN	NaN	49.34	NaN	NaN
Q8N806	259	Q8N806	Q8N806	Putative E3 ubiquitin-protein ligase UBR7	UBR7	GKDDVREVKVEQNSEPCAGSSSESDLQTVFK	3923	P	3	5791		1	0.0282084	45.784	42.775	45.784	0.71835	7292400	1	NaN	NaN	45.784	NaN	NaN
Q8N8S7	438	Q8N8S7	Q8N8S7	Protein enabled homolog	ENAH	SASSKTDTGRGNGPLPLGGSGLMEEMSALLA	3924	P	3	5810		0.990861	0.00186827	88.992	65.512	59.469	0.68191	98442000	0.990861	NaN	NaN	88.992	NaN	NaN
Q8N999	140	Q8N999	Q8N999	Uncharacterized protein C12orf29	C12orf29	EQINGNPVPDENGHIPGWVPVEKNNKQYCWH	3925	P	3	5820		0.975801	0.0191051	48.115	45.353	48.115	-4.2962	0	0.975801	NaN	NaN	48.115	NaN	NaN
Q8N999	144	Q8N999	Q8N999	Uncharacterized protein C12orf29	C12orf29	GNPVPDENGHIPGWVPVEKNNKQYCWHSSVV	3926	P	3	5820		0.935206	0.0191051	48.115	45.353	48.115	-4.2962	0	0.935206	NaN	NaN	48.115	NaN	NaN
Q8NAF0	481	Q8NAF0	Q8NAF0	Zinc finger protein 579	ZNF579	ELERAAALQALQAQAPTSPPPPPPPLKAEQE	3931	P	3	5839		0.680349	0.0165619	42.618	37.639	42.618	0.99557	52031000	NaN	NaN	0.680349	NaN	NaN	42.618
Q8NAF0	484	Q8NAF0	Q8NAF0	Zinc finger protein 579	ZNF579	RAAALQALQAQAPTSPPPPPPPLKAEQEEEG	3932	P	3	5839		0.680349	0.0165619	42.618	37.639	42.618	0.99557	52031000	NaN	NaN	0.680349	NaN	NaN	42.618
Q8NAF0	485	Q8NAF0	Q8NAF0	Zinc finger protein 579	ZNF579	AAALQALQAQAPTSPPPPPPPLKAEQEEEGL	3933	P	3	5839		0.680349	0.0165619	42.618	37.639	42.618	0.99557	52031000	NaN	NaN	0.680349	NaN	NaN	42.618
Q8NAF0	486	Q8NAF0	Q8NAF0	Zinc finger protein 579	ZNF579	AALQALQAQAPTSPPPPPPPLKAEQEEEGLP	3934	P	3	5839		0.680349	0.0165619	42.618	37.639	42.618	0.99557	52031000	NaN	NaN	0.680349	NaN	NaN	42.618
Q8NAF0	487	Q8NAF0	Q8NAF0	Zinc finger protein 579	ZNF579	ALQALQAQAPTSPPPPPPPLKAEQEEEGLPL	3935	P	3	5839		0.680349	0.0165619	42.618	37.639	42.618	0.99557	52031000	NaN	NaN	0.680349	NaN	NaN	42.618
Q8NAT1	398	Q8NAT1	Q8NAT1	Protein O-linked-mannose beta-1,4-N-acetylglucosaminyltransferase 2	POMGNT2	LPGMDLQYVAWRNMMPENTVTHPERPWDQGG	3936	P	6	5841		0.99535	0.0027256	43.622	43.622	43.622	0.013469	20765000	NaN	NaN	0.99535	NaN	NaN	43.622
Q8NAT1	384	Q8NAT1	Q8NAT1	Protein O-linked-mannose beta-1,4-N-acetylglucosaminyltransferase 2	POMGNT2	VNPDHYTPYKTLAMLPGMDLQYVAWRNMMPE	3937	P	2	5841		1	0.000824851	123.8	108.6	113.63	0.41154	36607000	NaN	NaN	1	NaN	NaN	123.8
Q8NB37	92	Q8NB37	Q8NB37	Parkinson disease 7 domain-containing protein 1	PDDC1	KLESIDGARYHALLIPSCPGALTDLASSGSL	3938	P	3	5847		0.813576	0.000955766	63.165	56.134	63.165	-0.56903	23199000	0.813576	NaN	NaN	63.165	NaN	NaN
Q8NB91	641	Q8NB91	Q8NB91	Fanconi anemia group B protein	FANCB	DLSTGKYLLTFPKKKPIEHMEDLFALLAAFH	3943	P	5	5854		1	0.000571664	76.768	75.403	76.768	-0.13429	41978000	NaN	NaN	1	NaN	NaN	76.768
Q8NC60	590	Q8NC60	Q8NC60	Nitric oxide-associated protein 1	NOA1	DALYQKHAGHTLLQIPMGGKERMAGFPPLVA	3961	P	3	5888		1	0.00371034	76.073	69.344	63.181	0.59781	33010000	1	NaN	NaN	76.073	NaN	NaN
Q8NCW5	220	Q8NCW5	Q8NCW5	NAD(P)H-hydrate epimerase	APOA1BP	SVLKGLTVPIASIDIPSGWDVEKGNAGGIQP	3966	P	3	5913		0.997998	3.67349e-05	56.252	54.707	56.252	-0.79572	51237000	NaN	NaN	0.997998	NaN	NaN	56.252
Q8NCW5	235	Q8NCW5	Q8NCW5	NAD(P)H-hydrate epimerase	APOA1BP	PSGWDVEKGNAGGIQPDLLISLTAPKKSATQ	3967	P	3	5913		0.929276	3.67349e-05	56.252	54.707	56.252	-0.79572	51237000	NaN	NaN	0.929276	NaN	NaN	56.252
Q8ND04	818	Q8ND04	Q8ND04	Protein SMG8	SMG8	RTRAEDEGDLDTNSWPAPNKAIPGKRSAVVM	3970	P	3	5915		1	0.000335527	98.175	83.085	58.848	1.3808	73362000	1	NaN	1	98.175	NaN	58.848
Q8ND04	820	Q8ND04	Q8ND04	Protein SMG8	SMG8	RAEDEGDLDTNSWPAPNKAIPGKRSAVVMGR	3971	P	3	5915		1	0.000335527	98.175	83.085	58.848	1.3808	73362000	1	NaN	1	98.175	NaN	58.848
Q8ND56	193	Q8ND56	Q8ND56	Protein LSM14 homolog A	LSM14A	SQGRSSPQLDPLRKSPTMEQAVQTASAHLPA	3972	P	4	5918		0.999999	0.000632455	66.3	59.425	66.3	-0.42124	15570000	0.999999	NaN	NaN	66.3	NaN	NaN
Q8ND83	216	Q8ND83	Q8ND83	SLAIN motif-containing protein 1	SLAIN1	KSLTPLQWCRHVLDNPTPEMEAARRSLCFRL	3973	P	3	5921		0.537142	0.0355816	46.964	42.793	46.964	0.1817	93900000	NaN	NaN	0.537142	NaN	NaN	46.964
Q8ND83	218	Q8ND83	Q8ND83	SLAIN motif-containing protein 1	SLAIN1	LTPLQWCRHVLDNPTPEMEAARRSLCFRLEQ	3974	P	3	5921		0.998747	0.0308355	77.42	72.803	77.42	-0.025996	115250000	NaN	NaN	0.998747	NaN	NaN	77.42
Q8NDF8	50	Q8NDF8	Q8NDF8	Non-canonical poly(A) RNA polymerase PAPD5	PAPD5	QPGAWARRAGSSASSPPSASSSPHPSAAVPA	3976	P	4	5926		0.998902	1.79617e-06	54.011	48.691	54.011	0.20783	34778000	0.998902	NaN	0.965718	54.011	NaN	42.038
Q8NDF8	51	Q8NDF8	Q8NDF8	Non-canonical poly(A) RNA polymerase PAPD5	PAPD5	PGAWARRAGSSASSPPSASSSPHPSAAVPAA	3977	P	4	5926		0.998902	1.79617e-06	54.011	48.691	54.011	0.20783	34778000	0.998902	NaN	0.965718	54.011	NaN	42.038
Q8NDF8	57	Q8NDF8	Q8NDF8	Non-canonical poly(A) RNA polymerase PAPD5	PAPD5	RAGSSASSPPSASSSPHPSAAVPAADPADSA	3978	P	4	5926		0.999005	1.79617e-06	54.011	48.691	54.011	0.20783	34778000	0.999005	NaN	0.969221	54.011	NaN	42.038
Q8NDF8	59	Q8NDF8	Q8NDF8	Non-canonical poly(A) RNA polymerase PAPD5	PAPD5	GSSASSPPSASSSPHPSAAVPAADPADSASG	3979	P	4	5926		0.999005	1.79617e-06	54.011	48.691	54.011	0.20783	34778000	0.999005	NaN	0.969221	54.011	NaN	42.038
Q8NDF8	64	Q8NDF8	Q8NDF8	Non-canonical poly(A) RNA polymerase PAPD5	PAPD5	SPPSASSSPHPSAAVPAADPADSASGSSNKR	3980	P	4	5926		0.997125	1.79617e-06	54.011	48.691	54.011	0.20783	34778000	0.997125	NaN	0.969221	54.011	NaN	42.038
Q8NDI1	1028	Q8NDI1	Q8NDI1	EH domain-binding protein 1	EHBP1	RKTQLQSFSQYIENRPEMKRQRSIQEDTKKG	3982	P	3	5929		1	0.0219567	69.148	47.948	69.148	0.50572	15934000	NaN	NaN	1	NaN	NaN	69.148
Q8NEM2	18	Q8NEM2	Q8NEM2	SHC SH2 domain-binding protein 1	SHCBP1	DGSLTGGGLEAAAMAPERMGWAVEQELASLE	3989	P	2	5958		1	0.00107926	72.958	67.465	72.958	-0.011363	13345000	1	NaN	NaN	72.958	NaN	NaN
Q8NEV8	1142	Q8NEV8	Q8NEV8	Exophilin-5	EXPH5	SGEPHASTGREGRKKPLTSGMDASELTPRAW	3990	P	2	5965		0.999999	0.0245531	61.353	27.975	61.353	-1.4522	46459000	0.999999	NaN	NaN	61.353	NaN	NaN
Q8NFC6	2758	Q8NFC6	Q8NFC6	Biorientation of chromosomes in cell division protein 1-like 1	BOD1L1	KDNAEAISGHSVEADPKEVEEEERHMPKRKR	3991	P	4	5978		0.905375	0.000142425	86.006	81.175	86.006	-0.27757	55495000	0.905375	NaN	NaN	86.006	NaN	NaN
Q8NFD5	509	Q8NFD5	Q8NFD5	AT-rich interactive domain-containing protein 1B	ARID1B	HPSGATPTLNQLLTSPSPMMRSYGGSYPEYS	3992	P	3	5979		0.519669	0.0096313	45.611	38.813	45.611	-0.36866	15045000	NaN	NaN	0.519669	NaN	NaN	45.611
Q8NFD5	2029	Q8NFD5	Q8NFD5	AT-rich interactive domain-containing protein 1B	ARID1B	RCICVSNIVRSLSFVPGNDAEMSKHPGLVLI	3993	P	2	5979		0.997789	0.00414228	96.464	85.024	96.464	-0.2659	24189000	NaN	NaN	0.997789	NaN	NaN	96.464
Q8NHQ9	30	Q8NHQ9	Q8NHQ9	ATP-dependent RNA helicase DDX55	DDX55	PLHPQVLGALRELGFPYMTPVQSATIPLFMR	4003	P	2	6016		0.876977	0.00088596	98.942	85.263	98.942	0.24786	17842000	0.876977	NaN	NaN	98.942	NaN	NaN
Q8NHU6	868	Q8NHU6	Q8NHU6	Tudor domain-containing protein 7	TDRD7	ISSGADSPNSKNGNMPMSGNTGENFRKNLTD	4004	P	3	6019		1	0.00649638	61.641	54.41	61.641	-0.19435	20355000	NaN	NaN	1	NaN	NaN	61.641
Q8NHV4	356	Q8NHV4	Q8NHV4	Protein NEDD1	NEDD1	VREAPATSIATVLPQPMTSAMGKGTVAVQEK	4005	P	3	6020		0.864559	0.0108711	48.919	48.919	46.786	-0.027983	230690000	NaN	NaN	0.864559	NaN	NaN	48.919
Q8NI36	365	Q8NI36	Q8NI36	WD repeat-containing protein 36	WDR36	TNGADNALRIWIFDGPTGEGRLLRFRMGHSA	4006	P	4	6028		0.996679	8.30113e-08	59.678	52.122	59.678	-2.6395	30200000	NaN	NaN	0.996679	NaN	NaN	59.678
Q8TAF3	547	Q8TAF3	Q8TAF3	WD repeat-containing protein 48	WDR48	DSGGETESMLLNETVPQWVIDITVDKNMPKF	4008	P	3	6043		0.992301	5.31386e-05	77.469	67.924	77.469	-0.1622	237710000	0.989973	NaN	0.992301	75.018	NaN	77.469
Q8TAT6	276	Q8TAT6	Q8TAT6	Nuclear protein localization protein 4 homolog	NPLOC4	DIPLGIRAEVAAIYEPPQIGTQNSLELLEDP	4012	P	5	6054		0.914415	0.0128468	66.871	40.936	52.061	-1.2954	533010000	NaN	NaN	0.914415	NaN	NaN	66.871
Q8TAT6	277	Q8TAT6	Q8TAT6	Nuclear protein localization protein 4 homolog	NPLOC4	IPLGIRAEVAAIYEPPQIGTQNSLELLEDPK	4013	P	5	6054		0.972962	0.0128468	66.871	40.936	52.061	-1.2954	533010000	NaN	NaN	0.972962	NaN	NaN	66.871
Q8TAT6	291	Q8TAT6	Q8TAT6	Nuclear protein localization protein 4 homolog	NPLOC4	PPQIGTQNSLELLEDPKAEVVDEIAAKLGLR	4014	P	4	6054		0.998195	0.0128468	66.871	40.936	66.871	-1.4445	251650000	NaN	NaN	0.998195	NaN	NaN	66.871
Q8TBC3	12	Q8TBC3	Q8TBC3	SH3KBP1-binding protein 1	SHKBP1	____MAAAATAAEGVPSRGPPGEVIHLNVGG	4016	P	3	6070		1	0.0166121	47.712	18.168	47.712	0.67726	6624600	NaN	NaN	1	NaN	NaN	47.712
Q8TBE0	93	Q8TBE0	Q8TBE0	Bromo adjacent homology domain-containing 1 protein	BAHD1	ENVAGPRSADEADELPPDLPKPPSPAPSSED	4022	P	3	6073		0.549897	0.00183439	43.256	38.149	43.256	1.2535	0	0.549897	NaN	NaN	43.256	NaN	NaN
Q8TBE0	94	Q8TBE0	Q8TBE0	Bromo adjacent homology domain-containing 1 protein	BAHD1	NVAGPRSADEADELPPDLPKPPSPAPSSEDP	4023	P	3	6073		0.549897	0.00183439	43.256	38.149	43.256	1.2535	0	0.549897	NaN	NaN	43.256	NaN	NaN
Q8TBE0	97	Q8TBE0	Q8TBE0	Bromo adjacent homology domain-containing 1 protein	BAHD1	GPRSADEADELPPDLPKPPSPAPSSEDPGLA	4024	P	3	6073		0.648483	0.00183439	43.256	38.149	43.256	1.2535	0	0.648483	NaN	NaN	43.256	NaN	NaN
Q8TBE0	99	Q8TBE0	Q8TBE0	Bromo adjacent homology domain-containing 1 protein	BAHD1	RSADEADELPPDLPKPPSPAPSSEDPGLAQP	4025	P	3	6073		0.734739	0.00183439	43.256	38.149	43.256	1.2535	0	0.734739	NaN	NaN	43.256	NaN	NaN
Q8TBE0	100	Q8TBE0	Q8TBE0	Bromo adjacent homology domain-containing 1 protein	BAHD1	SADEADELPPDLPKPPSPAPSSEDPGLAQPR	4026	P	3	6073		0.734739	0.00183439	43.256	38.149	43.256	1.2535	0	0.734739	NaN	NaN	43.256	NaN	NaN
Q8TBE9	223	Q8TBE9	Q8TBE9	N-acylneuraminate-9-phosphatase	NANP	WINKNGIVPLKSSPVPHYMVSSVLELPALLQ	4028	P	3	6075		0.833263	2.96909e-05	96.708	92.878	96.708	1.2162	24079000	NaN	0	0.833263	NaN	NaN	96.708
Q8TCT9	351	Q8TCT9	Q8TCT9	Minor histocompatibility antigen H13	HM13	AKGEVTEMFSYEESNPKDPAAVTESKEGTEA	4033	P	4	6116		0.818616	9.5886e-05	57.78	52.237	57.78	-0.95573	51458000	0.818616	NaN	NaN	57.78	NaN	NaN
Q8TCT9	354	Q8TCT9	Q8TCT9	Minor histocompatibility antigen H13	HM13	EVTEMFSYEESNPKDPAAVTESKEGTEASAS	4034	P	4	6116		0.525556	0.00633993	41.209	39.254	41.209	-0.29814	110770000	NaN	NaN	0.525556	NaN	NaN	41.209
Q8TCY9	544	Q8TCY9	Q8TCY9	Up-regulator of cell proliferation	URGCP	RRRLLELRMQQNGHDPSSGVQEFISGISSPS	4035	P	3	6119		0.999956	0.00965212	45.596	38.947	45.596	0.42152	15262000	0.999956	NaN	NaN	45.596	NaN	NaN
Q8TDH9	9	Q8TDH9	Q8TDH9	Biogenesis of lysosome-related organelles complex 1 subunit 5	BLOC1S5	_______MSGGGTETPVGCEAAPGGGSKKRD	4037	P	2	6138		0.953315	0.0121464	54.343	48.497	54.343	2.5757	14122000	0.911795	NaN	0.953315	44.829	NaN	54.343
Q8TDN6	315	Q8TDN6	Q8TDN6	Ribosome biogenesis protein BRX1 homolog	BRIX1	HDPTADVFVTPAEEKPIEIQWVKPEPKVDLK	4039	P	5	6143		0.686835	0.0252491	42.039	38.334	42.039	0.2203	236500000	0.686835	0	NaN	42.039	NaN	NaN
Q8TDP1	33	Q8TDP1	Q8TDP1	Ribonuclease H2 subunit C	RNASEH2C	SATLRDAVPATLHLLPCEVAVDGPAPVGRFF	4042	P	4	6144		0.986799	0.00086445	50.499	48.005	50.499	-1.5026	5643300	0.986799	NaN	NaN	50.499	NaN	NaN
Q8TEW0	227	Q8TEW0	Q8TEW0	Partitioning defective 3 homolog	PARD3	QFQRDNARSSLSASHPMVGKWLEKQEQDEDG	4048	P	2	6182		1	0.0167993	133.75	97.371	130.79	-0.46546	48984000	1	NaN	1	130.79	NaN	133.75
Q8TEW0	936	Q8TEW0	Q8TEW0	Partitioning defective 3 homolog	PARD3	CNESFRAAIDKSYDKPAVDDDDEGMETLEED	4049	P	3	6182		1	0.00576033	65.071	64.285	55.358	0.0057635	66586000	1	NaN	NaN	65.071	NaN	NaN
Q8TEX9	427	Q8TEX9	Q8TEX9	Importin-4	IPO4	NAALFALGQFSENLQPHISSYSREVMPLLLA	4052	P	4	6184		0.805662	2.28343e-05	105.5	100.8	105.5	0.1732	195620000	NaN	NaN	0.805662	NaN	NaN	105.5
Q8TF05	631	Q8TF05	Q8TF05	Serine/threonine-protein phosphatase 4 regulatory subunit 1	PPP4R1	VVPQALLDQYLSMTDPSRAQTVDTEIAKHCA	4055	P	3	6187		0.999778	0.00126734	58.98	45.135	58.98	-2.5086	12933000	NaN	NaN	0.999778	NaN	NaN	58.98
Q8WUA4	306	Q8WUA4	Q8WUA4	General transcription factor 3C polypeptide 2	GTF3C2	CRGMAPNGLPNHIMAPVWKCLHLTKDFREQK	4064	P	3	6223		0.996974	0.00273018	64.244	64.244	64.244	-0.4985	318750000	NaN	NaN	0.996974	NaN	NaN	64.244
Q8WUA7	152	Q8WUA7	Q8WUA7	TBC1 domain family member 22A	TBC1D22A	DLRLVKSVSESHTSCPAESASDAAPLQRSQS	4065	P	3	6224		0.999999	0.000446591	72.086	66.876	72.086	1.0004	12618000	0.999999	NaN	NaN	72.086	NaN	NaN
Q8WUZ0	113	Q8WUZ0	Q8WUZ0	B-cell CLL/lymphoma 7 protein family member C	BCL7C	NQSFHSEGSLQKGTEPSPGGTPQPSRPVSPA	4070	P	3	6255		0.76385	0.0012541	49.453	47.595	49.453	-0.90124	55415000	0.76385	NaN	NaN	49.453	NaN	NaN
Q8WUZ0	115	Q8WUZ0	Q8WUZ0	B-cell CLL/lymphoma 7 protein family member C	BCL7C	SFHSEGSLQKGTEPSPGGTPQPSRPVSPAGP	4071	P	3	6255		0.755005	0.0012541	49.453	47.595	49.453	-0.90124	55415000	0.755005	NaN	NaN	49.453	NaN	NaN
Q8WUZ0	119	Q8WUZ0	Q8WUZ0	B-cell CLL/lymphoma 7 protein family member C	BCL7C	EGSLQKGTEPSPGGTPQPSRPVSPAGPPEGV	4072	P	3	6255		0.857883	0.0012541	49.453	47.595	49.453	-0.90124	55415000	0.857883	NaN	NaN	49.453	NaN	NaN
Q8WUZ0	121	Q8WUZ0	Q8WUZ0	B-cell CLL/lymphoma 7 protein family member C	BCL7C	SLQKGTEPSPGGTPQPSRPVSPAGPPEGVPE	4073	P	3	6255		0.855859	0.0012541	49.453	47.595	49.453	-0.90124	55415000	0.855859	NaN	NaN	49.453	NaN	NaN
Q8WUZ0	124	Q8WUZ0	Q8WUZ0	B-cell CLL/lymphoma 7 protein family member C	BCL7C	KGTEPSPGGTPQPSRPVSPAGPPEGVPEEAQ	4074	P	3	6255		0.855859	0.0012541	49.453	47.595	49.453	-0.90124	55415000	0.855859	NaN	NaN	49.453	NaN	NaN
Q8WVB6	485	Q8WVB6	Q8WVB6	Chromosome transmission fidelity protein 18 homolog	CHTF18	GGGRRRRAEGGLLMRPIICICNDQFAPSLRQ	4076	P	3	6270		0.999998	0.00597661	65.425	58.776	65.425	0.14109	20139000	NaN	NaN	0.999998	NaN	NaN	65.425
Q8WVM8	82	Q8WVM8	Q8WVM8	Sec1 family domain-containing protein 1	SCFD1	DMGITLHLLLHSDRDPIPDVPAVYFVMPTEE	4079	P	4	6284		0.824309	7.57142e-08	74.446	74.446	74.446	-0.65504	104150000	0.824309	NaN	NaN	74.446	NaN	NaN
Q8WVM8	84	Q8WVM8	Q8WVM8	Sec1 family domain-containing protein 1	SCFD1	GITLHLLLHSDRDPIPDVPAVYFVMPTEENI	4080	P	5	6284		0.550263	1.42394e-05	62.663	62.663	62.663	1.6366	66488000	0.550263	NaN	NaN	62.663	NaN	NaN
Q8WVM8	450	Q8WVM8	Q8WVM8	Sec1 family domain-containing protein 1	SCFD1	DKSLLDIISDPDAGTPEDKMRLFLIYYISTQ	4082	P	3	6284		0.994133	0.00365208	84.493	43.531	84.493	-1.3838	107010000	0.982996	NaN	0.994133	71.073	NaN	84.493
Q8WVY7	262	Q8WVY7	Q8WVY7	Ubiquitin-like domain-containing CTD phosphatase 1	UBLCP1	NTIMFDDIGRNFLMNPQNGLKIRPFMKAHLN	4084	P	3	6294		1	0.0253032	44.729	32.533	44.729	2.5764	56842000	NaN	NaN	1	NaN	NaN	44.729
Q8WW38	542	Q8WW38	Q8WW38	Zinc finger protein ZFPM2	ZFPM2	RLRHGSSSYPPVIYSPLMPKGATCFECNITF	4085	P	3	6298		0.841885	0.0239399	50.653	18.266	50.653	-0.040961	23067000	0.841885	NaN	NaN	50.653	NaN	NaN
Q8WWI1	562	Q8WWI1	Q8WWI1	LIM domain only protein 7	LMO7	ERDIILQCREGELVLPDLEKDDMIVRRIPAQ	4086	P	2	6303		1	0.0151714	72.958	32.381	72.958	2.1573	0	1	NaN	NaN	72.958	NaN	NaN
Q8WWM7	6	Q8WWM7	Q8WWM7	Ataxin-2-like protein	ATXN2L	__________MLKPQPLQQPSQPQQPPPTQQ	4088	P	3	6307		0.56773	0.000170536	63.398	57.431	63.398	-0.39467	137720000	0.56773	NaN	NaN	63.398	NaN	NaN
Q8WWY3	83	Q8WWY3	Q8WWY3	U4/U6 small nuclear ribonucleoprotein Prp31	PRPF31	EEYISKQAKASEVMGPVEAAPEYRVIVDANN	4096	P	5	6313		0.965917	3.45377e-08	84.408	82.712	84.408	0.77334	383550000	NaN	NaN	0.965917	NaN	NaN	84.408
Q8WWY3	88	Q8WWY3	Q8WWY3	U4/U6 small nuclear ribonucleoprotein Prp31	PRPF31	KQAKASEVMGPVEAAPEYRVIVDANNLTVEI	4097	P	4	6313		0.969769	1.08284e-07	76.891	73.686	76.891	0.33162	652890000	0.969769	NaN	NaN	76.891	NaN	NaN
Q8WWY3	245	Q8WWY3	Q8WWY3	U4/U6 small nuclear ribonucleoprotein Prp31	PRPF31	KIMGVAGGLTNLSKMPACNIMLLGAQRKTLS	4098	P	2	6313		1	0.00651357	90.629	72.765	90.629	-0.076242	5306600	NaN	NaN	1	NaN	NaN	90.629
Q8WXA9	147	Q8WXA9	Q8WXA9	Splicing regulatory glutamine/lysine-rich protein 1	SREK1	DRPLKINHSNNAIVKPPEMTPQAAAKELEEV	4099	P	4	6319		0.556046	0.000778746	66.045	53.742	66.045	-0.52875	114580000	0.556046	NaN	NaN	66.045	NaN	NaN
Q8WXA9	148	Q8WXA9	Q8WXA9	Splicing regulatory glutamine/lysine-rich protein 1	SREK1	RPLKINHSNNAIVKPPEMTPQAAAKELEEVM	4100	P	3	6319		0.704365	3.48129e-05	94.234	83.091	94.234	1.0711	87061000	0.704365	NaN	NaN	94.234	NaN	NaN
Q8WXF1	491	Q8WXF1	Q8WXF1	Paraspeckle component 1	PSPC1	GSPMGSRTGSETPQAPMSGVGPVSGGPGGFG	4105	P	2	6328		0.99994	7.05575e-18	149.97	142.6	149.97	-0.27596	377780000	0.999263	NaN	0.99994	108.34	NaN	149.97
Q8WXH0	3281	Q8WXH0	Q8WXH0	Nesprin-2	SYNE2	TRAVESITSLEAIIIPYRVDVGNPEESLEMP	4106	P	3	6333		0.606894	0.000694675	107.87	98.329	107.87	0.8998	16928000	NaN	NaN	0.606894	NaN	NaN	107.87
Q8WXH0	3957	Q8WXH0	Q8WXH0	Nesprin-2	SYNE2	KTIAEIVSYQVELRLPQTGMKPLPVFQRTNQ	4111	P	4	6333		0.973772	0.000214573	78.202	74.158	78.202	0.69446	31207000	0.973772	NaN	NaN	78.202	NaN	NaN
Q92530	264	Q92530	Q92530	Proteasome inhibitor PI31 subunit	PSMF1	IGTSPPGPNPDHLPPPGYDDMYL________	4119	P	2	6374		0.864934	0.00510457	67.605	62.801	67.605	0.5902	30501000	0.864934	NaN	NaN	67.605	NaN	NaN
Q92538	730	Q92538	Q92538	Golgi-specific brefeldin A-resistance guanine nucleotide exchange factor 1	GBF1	KKGIQFLQEKGLLTIPMDNTEVAQWLRENPR	4123	P	3	6377		0.999977	0.000492815	83.213	78.204	83.213	0.84334	71187000	0.999977	NaN	NaN	83.213	NaN	NaN
Q92538	197	Q92538	Q92538	Golgi-specific brefeldin A-resistance guanine nucleotide exchange factor 1	GBF1	EHTLVDMVQLLFTRLPQFKEEPKNYVGTNMK	4124	P	3	6377		0.991099	0.000342043	88.836	83.858	88.836	1.057	32587000	NaN	NaN	0.991099	NaN	NaN	88.836
Q92556	2	Q92556	Q92556	Engulfment and cell motility protein 1	ELMO1	______________MPPPADIVKVAIEWPGA	4126	P	2	6388		0.749757	0.0261324	43.382	23.373	43.382	2.1233	115020000	0.749757	NaN	NaN	43.382	NaN	NaN
Q92556	3	Q92556	Q92556	Engulfment and cell motility protein 1	ELMO1	_____________MPPPADIVKVAIEWPGAY	4127	P	2	6388		0.749757	0.0261324	43.382	23.373	43.382	2.1233	115020000	0.749757	NaN	NaN	43.382	NaN	NaN
Q92556	4	Q92556	Q92556	Engulfment and cell motility protein 1	ELMO1	____________MPPPADIVKVAIEWPGAYP	4128	P	2	6388		0.749757	0.0261324	43.382	23.373	43.382	2.1233	115020000	0.749757	NaN	NaN	43.382	NaN	NaN
Q92556	15	Q92556	Q92556	Engulfment and cell motility protein 1	ELMO1	_MPPPADIVKVAIEWPGAYPKLMEIDQKKPL	4129	P	2	6388		0.750066	0.0261324	43.382	23.373	43.382	2.1233	115020000	0.750066	NaN	NaN	43.382	NaN	NaN
Q92560	302	Q92560	Q92560	Ubiquitin carboxyl-terminal hydrolase BAP1	BAP1	SASNKSPLVLEANRAPAASEGNHTDGAEEAA	4131	P	5	6390		0.999903	0.000581105	41.097	39.804	41.097	-0.17689	20280000	0.999903	NaN	NaN	41.097	NaN	NaN
Q92560	324	Q92560	Q92560	Ubiquitin carboxyl-terminal hydrolase BAP1	BAP1	HTDGAEEAAGSCAQAPSHSPPNKPKLVVKPP	4132	P	5	6390		0.999903	0.000581105	41.097	39.804	41.097	-0.17689	20280000	0.999903	NaN	NaN	41.097	NaN	NaN
Q92560	328	Q92560	Q92560	Ubiquitin carboxyl-terminal hydrolase BAP1	BAP1	AEEAAGSCAQAPSHSPPNKPKLVVKPPGSSL	4133	P	5	6390		0.999922	0.000581105	41.097	39.804	41.097	-0.17689	20280000	0.999922	NaN	NaN	41.097	NaN	NaN
Q92560	329	Q92560	Q92560	Ubiquitin carboxyl-terminal hydrolase BAP1	BAP1	EEAAGSCAQAPSHSPPNKPKLVVKPPGSSLN	4134	P	5	6390		0.999922	0.000581105	41.097	39.804	41.097	-0.17689	20280000	0.999922	NaN	NaN	41.097	NaN	NaN
Q92560	332	Q92560	Q92560	Ubiquitin carboxyl-terminal hydrolase BAP1	BAP1	AGSCAQAPSHSPPNKPKLVVKPPGSSLNGVH	4135	P	5	6390		0.999919	0.000581105	41.097	39.804	41.097	-0.17689	20280000	0.999919	NaN	NaN	41.097	NaN	NaN
Q92576	1427	Q92576	Q92576	PHD finger protein 3	PHF3	KPQQNLQEDLPTAVEPLMEVTKQEPPKPLRF	4138	P	3	6398		0.998871	0.0275296	56.247	53.519	56.247	0.3749	15225000	NaN	NaN	0.998871	NaN	NaN	56.247
Q92597	254	Q92597	Q92597	Protein NDRG1	NDRG1	IERPMPGTHTVTLQCPALLVVGDSSPAVDAV	4145	P	4	6401		0.749809	5.52366e-05	48.503	41.008	48.503	-0.90758	642090000	NaN	NaN	0.749809	NaN	NaN	48.503
Q92597	154	Q92597	Q92597	Protein NDRG1	NDRG1	TGAGAYILTRFALNNPEMVEGLVLINVNPCA	4146	P	3	6401		1	0.00032872	49.087	43.601	49.087	-4.3809	53981000	1	NaN	NaN	49.087	NaN	NaN
Q92597	167	Q92597	Q92597	Protein NDRG1	NDRG1	NNPEMVEGLVLINVNPCAEGWMDWAASKISG	4147	P	3	6401		1	0.00032872	49.087	43.601	49.087	-4.3809	75205000	1	NaN	NaN	49.087	NaN	NaN
Q92597	293	Q92597	Q92597	Protein NDRG1	NDRG1	PTKTTLLKMADCGGLPQISQPAKLAEAFKYF	4149	P	2	6401		0.999978	0.0155285	70.977	28.234	70.977	-0.93173	374650000	0.999978	NaN	NaN	70.977	NaN	NaN
Q92598	401	Q92598	Q92598	Heat shock protein 105 kDa	HSPH1	AFKVREFSVTDAVPFPISLIWNHDSEDTEGV	4150	P	4	6402		0.866051	0.00123759	45.192	40.917	45.192	-1.9603	53381000	NaN	NaN	0.866051	NaN	NaN	45.192
Q92615	517	Q92615	Q92615	La-related protein 4B	LARP4B	RKKREEKFTSSQTQSPTPPKPPSPSFELGLS	4152	P	3	6410		0.827161	0.00316271	43.896	42.171	43.896	-0.75137	61220000	0.827161	0	0	43.896	NaN	NaN
Q92616	2398	Q92616	Q92616	Translational activator GCN1	GCN1L1	PLFTELLNGIRAMEDPGVRDTMLQALRFVIQ	4158	P	3	6411		1	0.00814282	63.037	59.433	63.037	0.30963	268410000	NaN	NaN	1	NaN	NaN	63.037
Q92621	1029	Q92621	Q92621	Nuclear pore complex protein Nup205	NUP205	PVSTTNLQDPGVLGCPRTCLHAILNILEKGT	4165	P	3	6415		0.995584	0.0350516	72.207	66.998	72.207	-0.2001	29877000	0.995584	NaN	NaN	72.207	NaN	NaN
Q92621	1148	Q92621	Q92621	Nuclear pore complex protein Nup205	NUP205	RSHTQRLLHLLLDDMPVKPYSDGEGGIEDEN	4166	P	4	6415		0.80797	1.68427e-09	69.523	65.747	69.523	0.16081	34358000	0.80797	NaN	NaN	69.523	NaN	NaN
Q92625	1105	Q92625	Q92625	Ankyrin repeat and SAM domain-containing protein 1A	ANKS1A	VPKPRVGVRKSALEPPDMDQDAQSHASVSWV	4169	P	5	6419		0.79961	0.00399864	41.432	35.772	41.432	0.89871	23937000	0.79961	NaN	NaN	41.432	NaN	NaN
Q92766	590	Q92766	Q92766	Ras-responsive element-binding protein 1	RREB1	TRLSLQQPRAELPGQPEMKTQLEQDSIIEAL	4176	P	3	6442		0.79196	0.000921227	84.641	74.494	84.641	1.1226	21083000	NaN	NaN	0.79196	NaN	NaN	84.641
Q92769	255	Q92769	Q92769	Histone deacetylase 2	HDAC2	QIFKPIISKVMEMYQPSAVVLQCGADSLSGD	4180	P	3	6443		1	0.0096858	47.392	13.716	47.392	-0.52134	3393600	1	NaN	NaN	47.392	NaN	NaN
Q92783	272	Q92783	Q92783	Signal transducing adapter molecule 1	STAM	GLFPSNFVTADLTAEPEMIKTEKKTVQFSDD	4182	P	3	6447		0.99941	0.0118556	43.936	37.138	43.936	0.75641	14919000	NaN	NaN	0.99941	NaN	NaN	43.936
Q92783	8	Q92783	Q92783	Signal transducing adapter molecule 1	STAM	________MPLFATNPFDQDVEKATSEMNTA	4184	P	4	6447		0.999999	1.10897e-07	93.737	89.997	93.737	2.3692	18428000	NaN	NaN	0.999999	NaN	NaN	93.737
Q92793	275	Q92793	Q92793	CREB-binding protein	CREBBP	QAGGMAKMGITGNTSPFGQPFSQAGGQPMGA	4189	P	3	6451		0.996774	1.0148e-05	63.805	63.805	63.805	-0.98162	13258000	NaN	NaN	0.996774	NaN	NaN	63.805
Q92793	287	Q92793	Q92793	CREB-binding protein	CREBBP	NTSPFGQPFSQAGGQPMGATGVNPQLASKQS	4190	P	3	6451		0.87459	1.0148e-05	63.805	63.805	63.805	-0.98162	13258000	NaN	NaN	0.87459	NaN	NaN	63.805
Q92797	839	Q92797	Q92797	Symplekin	SYMPK	LRVIEQPIRGMGMNSPELLLLVENCPKGAET	4192	P	3	6454		1	0.00114344	78.228	73.25	78.228	-0.1737	16888000	1	NaN	NaN	78.228	NaN	NaN
Q92820	237	Q92820	Q92820	Gamma-glutamyl hydrolase	GGH	DGKIEFISTMEGYKYPVYGVQWHPEKAPYEW	4194	P	4	6459		0.996262	1.93064e-07	72.218	68.105	72.218	1.4005	59097000	NaN	NaN	0.996262	NaN	NaN	72.218
Q92830	215	Q92830	Q92830	Histone acetyltransferase KAT2A	KAT2A	YLFKLLRKCILQMTRPVVEGSLGSPPFEKPN	4195	P	2	6464		1	0.0289089	48.112	17.628	46.746	-1.9849	157960000	NaN	NaN	1	NaN	NaN	48.112
Q92830	224	Q92830	Q92830	Histone acetyltransferase KAT2A	KAT2A	ILQMTRPVVEGSLGSPPFEKPNIEQGVLNFV	4196	P	2	6464		1	0.0289089	48.112	17.628	46.746	-1.9849	157960000	NaN	NaN	1	NaN	NaN	48.112
Q92830	225	Q92830	Q92830	Histone acetyltransferase KAT2A	KAT2A	LQMTRPVVEGSLGSPPFEKPNIEQGVLNFVQ	4197	P	2	6464		1	0.0289089	48.112	17.628	46.746	-1.9849	157960000	NaN	NaN	1	NaN	NaN	48.112
Q92879	180	Q92879	Q92879	CUGBP Elav-like family member 1	CELF1	IKAMHQAQTMEGCSSPMVVKFADTQKDKEQK	4199	P	3	6478		1	0.0144885	54.764	51.867	54.764	-0.80322	23476000	1	NaN	NaN	54.764	NaN	NaN
Q92917	217	Q92917	Q92917	G patch domain and KOW motifs-containing protein	GPKOW	GLGLGANLTEAQALTPTGPSRMPRPDEEQEK	4206	P	4	6491		0.637322	0.0005112	54.324	49.004	54.324	-0.56573	46514000	NaN	NaN	0.637322	NaN	NaN	54.324
Q92917	131	Q92917	Q92917	G patch domain and KOW motifs-containing protein	GPKOW	LEERENAGVDPTLAIPMIQKGCTPSGEGADS	4207	P	2	6491		0.998347	0.0351028	64.104	34.168	64.104	0.9702	0	NaN	NaN	0.998347	NaN	NaN	64.104
Q92922	221	Q92922	Q92922	SWI/SNF complex subunit SMARCC1	SMARCC1	IYPYSSSQDDEEWLRPVMRKEKQVLVHWGFY	4208	P	3	6492		0.996126	0.000707113	80.156	71.761	80.156	0.18494	25884000	0.996126	NaN	NaN	80.156	NaN	NaN
Q92945	423	Q92945	Q92945	Far upstream element-binding protein 2	KHSRP	PGGRGRGRGQGNWGPPGGEMTFSIPTHKCGL	4209	P	3	6496		0.979915	6.68729e-07	112.56	107.24	112.56	-0.092182	294280000	0.979915	NaN	0.93544	112.56	NaN	76.301
Q92945	640	Q92945	Q92945	Far upstream element-binding protein 2	KHSRP	YYKKIGQQPQQPGAPPQQDYTKAWEEYYKKQ	4210	P	4	6496		0.978732	0.00139022	62.677	51.55	45.546	1.4638	332380000	0.977094	NaN	0.978732	62.677	NaN	49.266
Q92945	398	Q92945	Q92945	Far upstream element-binding protein 2	KHSRP	ARIINDLLQSLRSGPPGPPGGPGMPPGGRGR	4211	P	2	6496		0.911115	0.0304086	60.434	50.48	60.434	-0.57306	48683000	NaN	NaN	0.911115	NaN	NaN	60.434
Q92947	53	Q92947	Q92947	Glutaryl-CoA dehydrogenase, mitochondrial	GCDH	SQLAKSSRPEFDWQDPLVLEEQLTTDEILIR	4215	P	4	6497		0.993991	0.000140005	82.157	77.151	82.157	-3.5912	68165000	0.993991	NaN	NaN	82.157	NaN	NaN
Q92973	15	Q92973	Q92973	Transportin-1	TNPO1	_MVWDRQTKMEYEWKPDEQGLQQILQLLKES	4223	P	2	6501		1	0.0289582	61.375	54.938	61.375	-1.2968	0	1	NaN	NaN	61.375	NaN	NaN
Q92974	545	Q92974	Q92974	Rho guanine nucleotide exchange factor 2	ARHGEF2	DIANQEKGMFLISAAPPEMYEVHTASRDDRS	4225	P	3	6502		0.54456	0.0046686	56.54	56.54	56.54	0.97754	29461000	NaN	NaN	0.54456	NaN	NaN	56.54
Q92995	33	Q92995	Q92995	Ubiquitin carboxyl-terminal hydrolase 13	USP13	KMAAGDIGELLVPHMPTIRVPRSGDRVYKNE	4228	P	4	6509		0.778807	0.00485309	53.585	46.632	53.585	-2.6596	50737000	NaN	NaN	0.778807	NaN	NaN	53.585
Q93008	1819	Q93008	Q93008	Probable ubiquitin carboxyl-terminal hydrolase FAF-X	USP9X	WERECAIKFNDYFEFPRELDMEPYTVAGVAK	4231	P	3	6511		0.873493	0.015911	60.036	54.195	60.036	1.3099	164330000	0.873493	NaN	0.770107	60.036	NaN	54.235
Q93008	1978	Q93008	Q93008	Probable ubiquitin carboxyl-terminal hydrolase FAF-X	USP9X	DELIRYISELAITTRPHQIIMPSAIERSVRK	4233	P	4	6511		0.910941	6.65444e-10	124.32	115.99	124.32	3.0004	889770000	0.903215	NaN	0.910941	44.105	NaN	124.32
Q93008	521	Q93008	Q93008	Probable ubiquitin carboxyl-terminal hydrolase FAF-X	USP9X	KVLNLLWNLAHSDDVPVDIMDLALSAHIKIL	4235	P	3	6511		1	0.003186	58.877	51.011	58.877	-4.2107	0	1	NaN	NaN	58.877	NaN	NaN
Q93009	1073	Q93009	Q93009	Ubiquitin carboxyl-terminal hydrolase 7	USP7	VNLKDFEPQPGNMSHPRPWLGLDHFNKAPKR	4239	P	6	6512		0.98156	0.000474065	41.205	37.465	41.205	-2.0602	21061000	0.98156	NaN	0	41.205	NaN	NaN
Q93009	1075	Q93009	Q93009	Ubiquitin carboxyl-terminal hydrolase 7	USP7	LKDFEPQPGNMSHPRPWLGLDHFNKAPKRSR	4240	P	6	6512		0.98156	0.000474065	41.205	37.465	41.205	-2.0602	21061000	0.98156	NaN	0	41.205	NaN	NaN
Q93009	616	Q93009	Q93009	Ubiquitin carboxyl-terminal hydrolase 7	USP7	SLAEFVQSLSQTMGFPQDQIRLWPMQARSNG	4241	P	3	6512		1	0.0055037	43.732	33.571	43.732	-3.1674	23806000	NaN	NaN	1	NaN	NaN	43.732
Q93009	624	Q93009	Q93009	Ubiquitin carboxyl-terminal hydrolase 7	USP7	LSQTMGFPQDQIRLWPMQARSNGTKRPAMLD	4242	P	3	6512		1	0.0055037	43.732	33.571	43.732	-3.1674	23806000	NaN	NaN	1	NaN	NaN	43.732
Q93063	381	Q93063	Q93063	Exostosin-2	EXT2	PEEKMSDVYSILQSIPQRQIEEMQRQARWFW	4249	P	3	6519		1	1.53692e-05	79.511	72.065	79.511	-1.4524	9664800	NaN	NaN	1	NaN	NaN	79.511
Q969G3	15	Q969G3	Q969G3	SWI/SNF-related matrix-associated actin-dependent regulator of chromatin subfamily E member 1	SMARCE1	_MSKRPSYAPPPTPAPATQMPSTPGFVGYNP	4254	P	4	6532		0.696511	0.00043237	46.082	42.085	46.082	0.39859	16780000	NaN	NaN	0.696511	NaN	NaN	46.082
Q969S9	688	Q969S9	Q969S9	Ribosome-releasing factor 2, mitochondrial	GFM2	CVQKALKKADKQVLEPLMNLEVTVARDYLSP	4255	P	2	6557		1	3.98065e-13	130.24	121.52	130.24	2.9143	0	1	NaN	NaN	130.24	NaN	NaN
Q969X5	144	Q969X5	Q969X5	Endoplasmic reticulum-Golgi intermediate compartment protein 1	ERGIC1	NFHVSTHSATAQPQNPDMTHVIHKLSFGDTL	4259	P	5	6572		0.994306	1.69208e-07	79.071	72.47	79.071	-0.055384	45631000	0.994306	NaN	NaN	79.071	NaN	NaN
Q96A33	381	Q96A33	Q96A33	Coiled-coil domain-containing protein 47	CCDC47	PGSGNTYPKDMEALLPLMNMVIYSIDKAKKF	4262	P	3	6580		1	0.00136705	81.431	70.173	49.528	-0.32382	290950000	1	NaN	1	81.431	NaN	61.375
Q96AE4	422	Q96AE4	Q96AE4	Far upstream element-binding protein 1	FUBP1	GARIELQRNPPPNADPNMKLFTIRGTPQQID	4273	P	3	6597		0.967555	0.0100666	76.391	68.88	76.391	0.13493	544980000	NaN	NaN	0.967555	NaN	NaN	76.391
Q96B26	10	Q96B26	Q96B26	Exosome complex component RRP43	EXOSC8	______MAAGFKTVEPLEYYRRFLKENCRPD	4286	P	3	6621		1	0.0085634	50.897	31.319	50.897	1.5365	46157000	1	NaN	NaN	50.897	NaN	NaN
Q96BH1	221	Q96BH1	Q96BH1	E3 ubiquitin-protein ligase RNF25	RNF25	VYDLASLKAAPEPQQPMELYQPSAESLRQQE	4287	P	3	6633		0.996878	0.000238622	98.74	84.036	98.74	-0.0042767	48436000	NaN	NaN	0.996878	NaN	NaN	98.74
Q96C36	234	Q96C36	Q96C36	Pyrroline-5-carboxylate reductase 2	PYCR2	DSEQHPCQLKDNVCSPGGATIHALHFLESGG	4290	P	4	6668		1	0.000960169	60.036	57.195	60.036	0.034132	4672500	1	NaN	NaN	60.036	NaN	NaN
Q96C90	91	Q96C90	Q96C90	Protein phosphatase 1 regulatory subunit 14B	PPP1R14B	LEQLTRLYDCQEEEIPELEIDVDELLDMESD	4292	P	3	6672		1	0.000155402	65.581	60.525	65.581	1.1824	11665000	1	NaN	NaN	65.581	NaN	NaN
Q96DF8	98	Q96DF8	Q96DF8	Protein DGCR14	DGCR14	IAIKFGSALGKMSREPPPPYVTPATFETPEV	4297	P	4	6715		0.741462	9.7126e-05	61.45	55.848	61.45	2.6554	13688000	NaN	NaN	0.741462	NaN	NaN	61.45
Q96E14	129	Q96E14	Q96E14	RecQ-mediated genome instability protein 2	RMI2	EPCLQAVKMTDLSDNPIHESMWELEVEDLHR	4302	P	3	6736		1	6.48378e-05	66.045	56.328	66.045	-3.9102	0	NaN	NaN	1	NaN	NaN	66.045
Q96EE3	180	Q96EE3	Q96EE3	Nucleoporin SEH1	SEH1L	CSCISWNPSSSRAHSPMIAVGSDDSSPNAMA	4303	P	3	6747		0.997213	4.37616e-06	105.77	105.77	105.77	-0.74668	266740000	NaN	NaN	0.997213	NaN	NaN	105.77
Q96EE3	191	Q96EE3	Q96EE3	Nucleoporin SEH1	SEH1L	RAHSPMIAVGSDDSSPNAMAKVQIFEYNENT	4304	P	3	6747		0.582165	0.0042006	57.496	57.496	57.496	-1.4995	38128000	NaN	NaN	0.582165	NaN	NaN	57.496
Q96EU7	208	Q96EU7	Q96EU7	C1GALT1-specific chaperone 1	C1GALT1C1	SMKRLNSLLNIPEKCPEQGGMIWKISEDKQL	4306	P	3	6773		0.996071	0.0127019	67.995	60.549	67.995	-0.59199	17121000	NaN	NaN	0.996071	NaN	NaN	67.995
Q96EV2	306	Q96EV2	Q96EV2	RNA-binding protein 33	RBM33	QRRESTERGRMKDHRPALLPTQPPVVPQAPP	4307	P	5	6774		0.504879	0.000731949	47.919	43.158	47.919	0.85248	15290000	NaN	NaN	0.504879	NaN	NaN	47.919
Q96EV2	895	Q96EV2	Q96EV2	RNA-binding protein 33	RBM33	DVSISNVQPKTSNFVPSSANMQYQGQQMKAL	4308	P	3	6774		1	0.00251003	62.475	57.265	62.475	-1.9075	17333000	1	NaN	NaN	62.475	NaN	NaN
Q96EY7	640	Q96EY7	Q96EY7	Pentatricopeptide repeat domain-containing protein 3, mitochondrial	PTCD3	SQAIEVVELASAFSLPICEGLTQRVMSDFAI	4309	P	3	6782		0.999896	0.00192588	49.793	43.763	49.793	0.062862	2603000	0.999896	NaN	NaN	49.793	NaN	NaN
Q96F63	203	Q96F63	Q96F63	Coiled-coil domain-containing protein 97	CCDC97	YIGQYLTQEELSARTPTHQPPKPGSPGRPAC	4311	P	5	6793		0.804281	8.02308e-05	68.104	59.266	68.104	-1.7946	17073000	0.804281	NaN	NaN	68.104	NaN	NaN
Q96F63	207	Q96F63	Q96F63	Coiled-coil domain-containing protein 97	CCDC97	YLTQEELSARTPTHQPPKPGSPGRPACPLSN	4312	P	4	6793		0.796753	8.02308e-05	68.104	59.266	42.121	0.64871	127660000	0.796753	NaN	NaN	68.104	NaN	NaN
Q96F63	208	Q96F63	Q96F63	Coiled-coil domain-containing protein 97	CCDC97	LTQEELSARTPTHQPPKPGSPGRPACPLSNL	4313	P	4	6793		0.786272	8.02308e-05	68.104	59.266	42.121	0.64871	127660000	0.786272	NaN	NaN	68.104	NaN	NaN
Q96F63	210	Q96F63	Q96F63	Coiled-coil domain-containing protein 97	CCDC97	QEELSARTPTHQPPKPGSPGRPACPLSNLLL	4314	P	5	6793		0.785604	8.02308e-05	68.104	59.266	68.104	-1.7946	127660000	0.785604	NaN	NaN	68.104	NaN	NaN
Q96F63	213	Q96F63	Q96F63	Coiled-coil domain-containing protein 97	CCDC97	LSARTPTHQPPKPGSPGRPACPLSNLLLQSY	4315	P	5	6793		0.785604	8.02308e-05	68.104	59.266	68.104	-1.7946	127660000	0.785604	NaN	NaN	68.104	NaN	NaN
Q96F63	216	Q96F63	Q96F63	Coiled-coil domain-containing protein 97	CCDC97	RTPTHQPPKPGSPGRPACPLSNLLLQSYEER	4316	P	5	6793		0.785604	8.02308e-05	68.104	59.266	68.104	-1.7946	127660000	0.785604	NaN	NaN	68.104	NaN	NaN
Q96F63	219	Q96F63	Q96F63	Coiled-coil domain-containing protein 97	CCDC97	THQPPKPGSPGRPACPLSNLLLQSYEERELQ	4317	P	4	6793		0.772453	0.00442149	42.121	36.856	42.121	0.64871	110590000	0.772453	NaN	NaN	42.121	NaN	NaN
Q96FH0	4	Q96FH0	Q96FH0	Protein MEF2BNB	MEF2BNB	____________MEEPEMQLKGKKVTDKFTE	4319	P	2	6802		1	0.00771374	84.615	73.021	84.615	-0.34855	14463000	1	NaN	NaN	84.615	NaN	NaN
Q96FV9	476	Q96FV9	Q96FV9	THO complex subunit 1	THOC1	PTLEEFFEEAIEQADPENMVENEYKAVNNSN	4320	P	4	6814		0.82628	0.00153791	46.464	46.464	46.464	0.74142	15682000	0.82628	NaN	NaN	46.464	NaN	NaN
Q96GA7	4	Q96GA7	Q96GA7	Serine dehydratase-like	SDSL	____________MDGPVAEHAKQEPFHVVTP	4324	P	4	6833		0.711735	7.39446e-08	94.503	94.503	94.503	2.7923	45979000	NaN	NaN	0.711735	NaN	NaN	94.503
Q96GQ7	84	Q96GQ7	Q96GQ7	Probable ATP-dependent RNA helicase DDX27	DDX27	RRQKALGKNRSADFNPDFVFTEKEGTYDGSW	4328	P	3	6852		1	0.00514089	42.121	37.72	42.121	-1.605	0	1	NaN	NaN	42.121	NaN	NaN
Q96GS4	131	Q96GS4	Q96GS4	Uncharacterized protein C17orf59	C17orf59	PEGKPSSGRDCRRGGPGGGMDVEQQEEEDND	4329	P	3	6853		1	0.00167801	87.489	87.487	74.748	-0.19009	180890000	1	NaN	NaN	87.489	NaN	NaN
Q96GV9	180	Q96GV9	Q96GV9	UNC119-binding protein C5orf30	C5orf30	SKSLDYLNLDKMIKEPADTEVLQYQLQHLTL	4330	P	5	6855		1	0.0160782	41.446	31.859	41.446	0.39445	29885000	NaN	NaN	1	NaN	NaN	41.446
Q96GX5	195	Q96GX5	Q96GX5	Serine/threonine-protein kinase greatwall	MASTL	VTLNRDINMMDILTTPSMAKPRQDYSRTPGQ	4331	P	3	6859		0.984168	0.035812	42.068	42.068	42.068	-0.37776	18596000	NaN	NaN	0.984168	NaN	NaN	42.068
Q96GX9	129	Q96GX9	Q96GX9	Methylthioribulose-1-phosphate dehydratase	APIP	IHTHSKAAVMATLLFPGREFKITHQEMIKGI	4332	P	4	6860		1	0.00824651	51.834	38.905	51.834	0.078114	109330000	NaN	NaN	1	NaN	NaN	51.834
Q96HA7	1098	Q96HA7	Q96HA7	Tonsoku-like protein	TONSL	GDKCVAELVAALGTMPSLALLDLSSNHLGPE	4333	P	4	6872		1	7.80626e-16	139	129.86	139	-0.53692	212430000	1	NaN	NaN	139	NaN	NaN
Q96HC4	207	Q96HC4	Q96HC4	PDZ and LIM domain protein 5	PDLIM5	SALSAGKTAVNVPRQPTVTSVCSETSQELAE	4335	P	3	6875		0.834681	0.0184908	51.963	45.868	51.963	0.23245	11863000	0.834681	NaN	NaN	51.963	NaN	NaN
Q96HE7	174	Q96HE7	Q96HE7	ERO1-like protein alpha	ERO1L	DDSSDNFCEADDIQSPEAEYVDLLLNPERYT	4337	P	3	6877		0.999964	0.00254896	48.422	48.182	48.422	0.12766	14999000	0.999964	NaN	NaN	48.422	NaN	NaN
Q96HN2	209	Q96HN2	Q96HN2	Putative adenosylhomocysteinase 3	AHCYL2	AEFGRREIEIAEQEMPALMALRKRAQGEKPL	4338	P	3	6884		1	0.000338225	92.575	69.246	92.575	-0.45791	78406000	NaN	NaN	1	NaN	NaN	92.575
Q96HR8	277	Q96HR8	Q96HR8	H/ACA ribonucleoprotein complex non-core subunit NAF1	NAF1	IESKGIKIKETMYFAPSMKDFTQYIFTEKLK	4341	P	4	6890		1	5.14793e-05	83.606	76.883	83.606	-0.20043	210820000	1	NaN	1	58.457	NaN	83.606
Q96HY7	773	Q96HY7	Q96HY7	Probable 2-oxoglutarate dehydrogenase E1 component DHKTD1, mitochondrial	DHTKD1	RKPLIVASPKMLLRLPAAVSTLQEMAPGTTF	4342	P	3	6898		0.999975	9.37646e-07	64.39	64.39	54.583	-0.46543	29542000	0.999975	NaN	0.810224	54.583	NaN	64.39
Q96HY7	784	Q96HY7	Q96HY7	Probable 2-oxoglutarate dehydrogenase E1 component DHKTD1, mitochondrial	DHTKD1	LLRLPAAVSTLQEMAPGTTFNPVIGDSSVDP	4343	P	3	6898		0.850153	0.00100071	54.583	54.583	54.583	-0.46543	13463000	0.850153	NaN	NaN	54.583	NaN	NaN
Q96HY7	542	Q96HY7	Q96HY7	Probable 2-oxoglutarate dehydrogenase E1 component DHKTD1, mitochondrial	DHTKD1	PLDLLRFVGMKSVEVPRELQMHSHLLKTHVQ	4344	P	4	6898		1	0.0175911	50.874	44.101	50.874	-0.64293	112990000	NaN	NaN	1	NaN	NaN	50.874
Q96I25	211	Q96I25	Q96I25	Splicing factor 45	RBM17	EDSRPRSQSSKAAIPPPVYEEQDRPRSPTGP	4350	P	4	6903		0.94597	8.69541e-08	65.378	56.54	65.378	-2.0201	116740000	0.896405	NaN	0.94597	44.564	NaN	65.378
Q96I25	212	Q96I25	Q96I25	Splicing factor 45	RBM17	DSRPRSQSSKAAIPPPVYEEQDRPRSPTGPS	4351	P	4	6903		0.94597	8.69541e-08	65.378	56.54	65.378	-2.0201	116740000	0.896405	NaN	0.94597	44.564	NaN	65.378
Q96I25	220	Q96I25	Q96I25	Splicing factor 45	RBM17	SKAAIPPPVYEEQDRPRSPTGPSNSFLANMG	4352	P	4	6903		0.94597	8.69541e-08	65.378	56.54	65.378	-2.0201	116740000	0.896405	NaN	0.94597	44.564	NaN	65.378
Q96I25	223	Q96I25	Q96I25	Splicing factor 45	RBM17	AIPPPVYEEQDRPRSPTGPSNSFLANMGGTV	4353	P	4	6903		0.94597	8.69541e-08	65.378	56.54	65.378	-2.0201	116740000	0.896405	NaN	0.94597	44.564	NaN	65.378
Q96I25	226	Q96I25	Q96I25	Splicing factor 45	RBM17	PPVYEEQDRPRSPTGPSNSFLANMGGTVAHK	4354	P	4	6903		0.94597	8.69541e-08	65.378	56.54	65.378	-2.0201	116740000	0.896405	NaN	0.94597	44.564	NaN	65.378
Q96I59	441	Q96I59	Q96I59	Probable asparagine--tRNA ligase, mitochondrial	NARS2	EVYQWYLDLRRFGSVPHGGFGMGFERYLQCI	4355	P	5	6908		1	1.36433e-05	82.555	77.747	82.555	-0.523	31438000	NaN	NaN	1	NaN	NaN	82.555
Q96JB2	224	Q96JB2	Q96JB2	Conserved oligomeric Golgi complex subunit 3	COG3	KLNSPTLSVNSDGFIPMLAKLDDCITYISSH	4357	P	3	6936		0.999526	0.00143899	51.9	46.895	51.9	0.71965	20064000	0.999526	NaN	NaN	51.9	NaN	NaN
Q96JB5	49	Q96JB5	Q96JB5	CDK5 regulatory subunit-associated protein 3	CDK5RAP3	VLTIREKINAAIQDMPESEEIAQLLSGSYIH	4358	P	4	6938		1	0.000140963	94.192	88.872	94.192	1.1956	18983000	1	NaN	NaN	94.192	NaN	NaN
Q96JH7	302	Q96JH7	Q96JH7	Deubiquitinating protein VCIP135	VCPIP1	LRNIHIFGLANVLHRPIILLDSLSGMRSSGD	4362	P	3	6943		1	0.000232324	98.3	91.014	98.3	0.53329	65174000	NaN	NaN	1	NaN	NaN	98.3
Q96K17	99	Q96K17	Q96K17	Transcription factor BTF3 homolog 4	BTF3L4	AITGHAEAKPITEMLPGILSQLGADSLTSLR	4368	P	6	6960		0.542645	7.8778e-09	60.64	56.115	60.64	0.31208	24590000	NaN	NaN	0.542645	NaN	NaN	60.64
Q96K58	597	Q96K58	Q96K58	Zinc finger protein 668	ZNF668	LSASDLRKHERTHPVPMGTPTPLEPLVALLG	4369	P	2	6967		0.691311	0.00162181	65.374	65.374	65.374	2.1225	0	0.691311	NaN	NaN	65.374	NaN	NaN
Q96K76	679	Q96K76	Q96K76	Ubiquitin carboxyl-terminal hydrolase 47	USP47	FHDYLERSYEGEEDTPMGLLLGGVKSTYMFD	4371	P	4	6969		1	0.000602445	52.669	43.288	52.669	1.3096	34557000	NaN	NaN	1	NaN	NaN	52.669
Q96KB5	25	Q96KB5	Q96KB5	Lymphokine-activated killer T-cell-originated protein kinase	PBK	PSKLSEKKKSVLCSTPTINIPASPFMQKLGF	4372	P	2	6973		0.994432	0.00635483	64.65	57.106	64.65	-0.8909	0	0.994432	NaN	NaN	64.65	NaN	NaN
Q96KP4	371	Q96KP4	Q96KP4	Cytosolic non-specific dipeptidase	CNDP2	QVTSYLTKKFAELRSPNEFKVYMGHGGKPWV	4376	P	7	6983		0.565578	9.1202e-05	53.55	43.492	53.55	-1.2073	69176000	NaN	NaN	0.565578	NaN	NaN	53.55
Q96LD8	3	Q96LD8	Q96LD8	Sentrin-specific protease 8	SENP8	_____________MDPVVLSYMDSLLRQSDV	4384	P	2	6998		1	0.00723501	59.57	49.882	59.57	-0.11925	60370000	NaN	NaN	1	NaN	NaN	59.57
Q96M27	246	Q96M27	Q96M27	Protein PRRC1	PRRC1	DKTKHSVESMITTLDPGMAPYIKSGGELDIV	4385	P	2	7011		0.989739	3.8365e-11	155.86	155.86	155.86	-1.3208	176440000	0.989739	NaN	0.959548	155.86	NaN	63.46
Q96ME1	500	Q96ME1	Q96ME1	F-box/LRR-repeat protein 18	FBXL18	LEHLELIGSNFSSAMPRNEPAIRNSLPPCSR	4386	P	3	7018		1	0.000182379	75.646	67.654	75.646	-0.91759	120690000	0.999968	NaN	1	52.483	NaN	75.646
Q96ME7	322	Q96ME7	Q96ME7	Zinc finger protein 512	ZNF512	RSEHGPISFFPESGQPECLKEMNLESKSGGR	4388	P	4	7019		0.944887	0.01293	40.756	35.381	40.756	0.53283	41002000	0.944887	NaN	NaN	40.756	NaN	NaN
Q96MG7	160	Q96MG7	Q96MG7	Melanoma-associated antigen G1	NDNL2	LEPKSNTYILINTLEPVEEDAEMRGDQGTPT	4389	P	2	7021		1	4.81557e-09	123.84	99.116	123.84	1.7932	6054100	1	NaN	NaN	123.84	NaN	NaN
Q96MW5	159	Q96MW5	Q96MW5	Conserved oligomeric Golgi complex subunit 8	COG8	LTLNRHTEILEILEIPQLMDTCVRNSYYEEA	4390	P	2	7034		1	5.85177e-12	161.48	150	161.48	-1.5113	174820000	1	NaN	NaN	161.48	NaN	NaN
Q96N66	281	Q96N66	Q96N66	Lysophospholipid acyltransferase 7	MBOAT7	VAAKARAGGGPTLQCPPPSSPEKAASLEYDY	4393	P	2	7043		0.809146	0.0079952	105.65	91.99	105.65	-0.12303	12098000	0.809146	NaN	NaN	105.65	NaN	NaN
Q96P16	293	Q96P16	Q96P16	Regulation of nuclear pre-mRNA domain-containing protein 1A	RPRD1A	ELRSRIQSLPDLSRLPNVTGSHMHLPFAGDI	4396	P	3	7066		0.991953	0.0213831	48.229	43.96	48.229	0.18264	895610000	0.96012	NaN	0.991953	41.136	NaN	48.229
Q96PC5	1264	Q96PC5	Q96PC5	Melanoma inhibitory activity protein 2	MIA2	RSFNMPSLDKMDGSMPSEMESSRNDTKDDLG	4400	P	3	7073		1	0.0350252	42.314	39.84	42.314	0.21573	6809900	1	NaN	NaN	42.314	NaN	NaN
Q96PC5	1332	Q96PC5	Q96PC5	Melanoma inhibitory activity protein 2	MIA2	RGPFLRRGPPFPPPPPGAMFGASRDYFPPGD	4401	P	3	7073		0.894967	0.00393419	59.434	49.377	59.434	0.8479	16400000	NaN	NaN	0.894967	NaN	NaN	59.434
Q96PV6	290	Q96PV6	Q96PV6	Leukocyte receptor cluster member 8	LENG8	GSSARGNLSGKPDDWPQDMKEYVERCFTACE	4404	P	2	7086		0.996188	8.13644e-06	111.12	103.71	111.12	-3.4625	0	0.996188	NaN	NaN	111.12	NaN	NaN
Q96QK1	162	Q96QK1	Q96QK1	Vacuolar protein sorting-associated protein 35	VPS35	LFLRNYLLQCTRNILPDEGEPTDEETTGDIS	4407	P	3	7109		0.524653	0.00211178	40.328	40.328	40.328	0.62677	9294300	NaN	NaN	0.524653	NaN	NaN	40.328
Q96RQ3	391	Q96RQ3	Q96RQ3	Methylcrotonoyl-CoA carboxylase subunit alpha, mitochondrial	MCCC1	TLQGHAFEARIYAEDPSNNFMPVAGPLVHLS	4410	P	3	7128		0.879195	0.00288476	57.578	50.466	57.578	-0.024591	144020000	0.879195	NaN	NaN	57.578	NaN	NaN
Q96RQ3	127	Q96RQ3	Q96RQ3	Methylcrotonoyl-CoA carboxylase subunit alpha, mitochondrial	MCCC1	KIIQVAKTSAAQAIHPGCGFLSENMEFAELC	4411	P	3	7128		1	0.0233305	42.106	39.633	42.106	-0.79111	7292000	1	NaN	NaN	42.106	NaN	NaN
Q96RQ3	652	Q96RQ3	Q96RQ3	Methylcrotonoyl-CoA carboxylase subunit alpha, mitochondrial	MCCC1	LSSVSSQETQGGPLAPMTGTIEKVFVKAGDK	4412	P	3	7128		0.919062	0.00340811	56.131	53.208	56.131	-0.37086	37710000	0.919062	NaN	NaN	56.131	NaN	NaN
Q96RT1	615	Q96RT1	Q96RT1	Protein LAP2	ERBB2IP	ELSSDEEMKMAEMRPPLIETSINQPKVVALS	4414	P	3	7133		0.585318	0.000585229	92.211	92.211	92.211	0.30101	12978000	0.585318	NaN	NaN	92.211	NaN	NaN
Q96RT1	361	Q96RT1	Q96RT1	Protein LAP2	ERBB2IP	NITVLFLHSNKLETLPEEMGDMQKLKVINLS	4415	P	3	7133		1	0.000902927	66.871	59.918	66.871	1.5376	12783000	NaN	NaN	1	NaN	NaN	66.871
Q96RT7	1210	Q96RT7	Q96RT7	Gamma-tubulin complex component 6	TUBGCP6	SISLGESVSDMAPTRPRWNTHGHVSDTSIRV	4417	P	5	7134		0.806613	0.0043771	46.296	43.605	46.296	3.8955	22994000	NaN	NaN	0.806613	NaN	NaN	46.296
Q96S59	484	Q96S59	Q96S59	Ran-binding protein 9	RANBP9	KSQDSYPVSPRPFSSPSMSPSHGMNIHNLAS	4422	P	5	7151		0.842258	5.45702e-07	74.364	74.364	74.364	-0.018433	287540000	0.842258	NaN	NaN	74.364	NaN	NaN
Q96S66	114	Q96S66	Q96S66	Chloride channel CLIC-like protein 1	CLCC1	RYLNKILIEAGKLGLPDENKGDMHYDAEIIL	4423	P	5	7153		1	0.0188365	45.047	38.324	45.047	-0.072172	84820000	NaN	NaN	1	NaN	NaN	45.047
Q96SB3	70	Q96SB3	Q96SB3	Neurabin-2	PPP1R9B	HRIKSMFLQMGTTAGPSGEAGGGAGLAEAPR	4425	P	3	7160		0.999934	0.0114202	44.264	41.066	44.264	-0.55617	20726000	NaN	NaN	0.999934	NaN	NaN	44.264
Q96SI9	412	Q96SI9	Q96SI9	Spermatid perinuclear RNA-binding protein	STRBP	QIRPGLQYKLLSQSGPVHAPVFTMSVDVDGT	4427	P	4	7165		0.900863	8.98081e-07	64.686	55.697	64.686	2.1272	21447000	0.900863	NaN	NaN	64.686	NaN	NaN
Q96SI9	416	Q96SI9	Q96SI9	Spermatid perinuclear RNA-binding protein	STRBP	GLQYKLLSQSGPVHAPVFTMSVDVDGTTYEA	4428	P	4	7165		0.776196	3.60491e-06	71.881	62.892	71.881	0.34517	51289000	0.776196	NaN	NaN	71.881	NaN	NaN
Q96ST3	1223	Q96ST3	Q96ST3	Paired amphipathic helix protein Sin3a	SIN3A	QRFQAWVDKWTKEHVPREMAAETSKWLMGEG	4430	P	3	7173		1	0.00542097	103.76	77.637	75.102	0.48863	191380000	NaN	NaN	1	NaN	NaN	103.76
Q96SY0	16	Q96SY0	Q96SY0	von Willebrand factor A domain-containing protein 9	VWA9	MPTVVVMDVSLSMTRPVSIEGSEEYQRKHLA	4432	P	4	7177		0.999999	1.22441e-05	114.35	114.35	114.35	0.6903	32380000	0.999993	NaN	0.999999	71.678	NaN	114.35
Q96SZ6	3	Q96SZ6	Q96SZ6	CDK5 regulatory subunit-associated protein 1	CDK5RAP1	_____________MHPLQCVLQVQRSLGWGP	4433	P	2	7179		1	0.00869653	89.355	52.83	66.692	0.46921	4063800000	1	NaN	1	68.735	NaN	89.355
Q96SZ6	550	Q96SZ6	Q96SZ6	CDK5 regulatory subunit-associated protein 1	CDK5RAP1	TDLCGRNDGNLKVIFPDAEMEDVNNPGLRVR	4434	P	3	7179		0.999938	0.0226986	51.147	39.687	51.147	0.1242	40835000	0.999938	NaN	NaN	51.147	NaN	NaN
Q96T17	42	Q96T17	Q96T17	MAP7 domain-containing protein 2	MAP7D2	IAEPGAVRTSQPNYRPQGMEGFLKSDERQRL	4435	P	3	7180		0.994955	0.0215013	71.354	63.945	71.354	0.16099	133010000	NaN	NaN	0.994955	NaN	NaN	71.354
Q96T25	403	Q96T25	Q96T25	Zinc finger protein ZIC 5	ZIC5	MRQPIKQELICKWIDPDELAGLPPPPPPPPP	4436	P	3	7183		0.664109	0.0184371	45.611	32.363	45.611	-4.2164	0	0.664109	NaN	NaN	45.611	NaN	NaN
Q96T58	2838	Q96T58	Q96T58	Msx2-interacting protein	SPEN	KTEGPQRISAKISQIPPASAMDIEFQQSVSK	4438	P	3	7187		0.558412	0.000973968	73.21	51.595	64.203	-1.1628	42074000	NaN	NaN	0.558412	NaN	NaN	73.21
Q96T88	515	Q96T88	Q96T88	E3 ubiquitin-protein ligase UHRF1	UHRF1	KLTNTNRALALNCFAPINDQEGAEAKDWRSG	4441	P	3	7192		1	0.0339049	48.288	44.568	48.288	-0.40265	18319000	1	NaN	NaN	48.288	NaN	NaN
Q96T88	288	Q96T88	Q96T88	E3 ubiquitin-protein ligase UHRF1	UHRF1	FVDEVFKIERPGEGSPMVDNPMRRKSGPSCK	4443	P	4	7192		0.806446	3.98354e-05	95.926	83.865	95.926	-0.38073	37254000	0.806446	NaN	NaN	95.926	NaN	NaN
Q99417	60	Q99417	Q99417	C-Myc-binding protein	MYCBP	LDFLKHHLGAATPENPEIELLRLELAEMKEK	4452	P	4	7197		0.991714	0.00244418	55.127	51.323	55.127	-0.49612	10212000	NaN	NaN	0.991714	NaN	NaN	55.127
Q99460	634	Q99460	Q99460	26S proteasome non-ATPase regulatory subunit 1	PSMD1	VESLGFILFRTPEQCPSVVSLLSESYNPHVR	4454	P	3	7206		0.833079	1.12502e-09	117.55	117.55	117.55	-0.27427	32417000	0.833079	NaN	0.704939	117.55	NaN	54.008
Q99567	7	Q99567	Q99567	Nuclear pore complex protein Nup88	NUP88	_________MAAAEGPVGDGELWQTWLPNHV	4467	P	3	7225		0.785805	0.00339466	42.322	28.592	42.322	-3.7475	37219000	0.785805	NaN	NaN	42.322	NaN	NaN
Q99598	81	Q99598	Q99598	Translin-associated protein X	TSNAX	ESKRTIFLLHRITSAPDMEDILTESEIKLDG	4470	P	4	7236		1	9.25218e-08	124.09	103	101.94	1.1524	254320000	1	NaN	1	124.09	NaN	101.94
Q99614	147	Q99614	Q99614	Tetratricopeptide repeat protein 1	TTC1	YIEAESSYSRALEMCPSCFQKERSILFSNRA	4473	P	2	7240		1	0.0218203	80.455	67.665	80.455	-0.4228	46568000	1	NaN	NaN	80.455	NaN	NaN
Q99614	31	Q99614	Q99614	Tetratricopeptide repeat protein 1	TTC1	NGLKVTDTQEAECAGPPVPDPKNQHSQSKLL	4474	P	2	7240		0.774924	0.00194189	110.98	106.43	110.98	0.70628	23267000	0.774924	NaN	NaN	110.98	NaN	NaN
Q99615	16	Q99615	Q99615	DnaJ homolog subfamily C member 7	DNAJC7	MAAAAECDVVMAATEPELLDDQEAKREAETF	4475	P	3	7241		1	0.00417772	42.612	41.651	42.612	-1.0325	43305000	NaN	NaN	1	NaN	NaN	42.612
Q99623	112	Q99623	Q99623	Prohibitin-2	PHB2	KDLQMVNISLRVLSRPNAQELPSMYQRLGLD	4476	P	4	7244		0.538987	0.0156082	42.106	42.106	42.106	-1.4551	4256300	0.538987	NaN	NaN	42.106	NaN	NaN
Q99623	118	Q99623	Q99623	Prohibitin-2	PHB2	NISLRVLSRPNAQELPSMYQRLGLDYEERVL	4477	P	2	7244		0.999998	0.020341	112.84	96.955	112.84	0.48572	732160000	0.999684	NaN	0.999998	51.147	NaN	112.84
Q99661	247	Q99661	Q99661	Kinesin-like protein KIF2C	KIF2C	FARMIKEFRATLECHPLTMTDPIEEHRICVC	4481	P	4	7252		0.998159	0.0108772	49.993	41.499	49.993	-1.2292	42632000	NaN	NaN	0.998159	NaN	NaN	49.993
Q99708	234	Q99708	Q99708	DNA endonuclease RBBP8	RBBP8	ENEILVADTYDQSQSPMAKAHGTSSYTPDKS	4486	P	4	7262		0.999905	0.00275806	44.365	38.991	44.365	-0.034789	55742000	0.999905	NaN	NaN	44.365	NaN	NaN
Q99733	11	Q99733	Q99733	Nucleosome assembly protein 1-like 4	NAP1L4	_____MADHSFSDGVPSDSVEAAKNASNTEK	4491	P	4	7269		0.879863	0.00115073	40.764	35.657	40.764	-2.1783	4235200	NaN	NaN	0.879863	NaN	NaN	40.764
Q99747	111	Q99747	Q99747	Gamma-soluble NSF attachment protein	NAPG	QLIEKASMMYLENGTPDTAAMALERAGKLIE	4493	P	2	7272		1	0.00988273	59.898	52.174	59.898	3.7808	0	NaN	NaN	1	NaN	NaN	59.898
Q99798	330	Q99798	Q99798	Aconitate hydratase, mitochondrial	ACO2	IANLADEFKDHLVPDPGCHYDQLIEINLSEL	4496	P	4	7280		0.956047	0.011353	44.848	42.272	44.848	-0.38212	4979800	0.956047	NaN	NaN	44.848	NaN	NaN
Q99798	570	Q99798	Q99798	Aconitate hydratase, mitochondrial	ACO2	HVDVSPTSQRLQLLEPFDKWDGKDLEDLQIL	4497	P	4	7280		1	0.031365	46.154	39.431	46.154	-1.938	56188000	1	NaN	NaN	46.154	NaN	NaN
Q99832	315	Q99832	Q99832	T-complex protein 1 subunit eta	CCT7	TQYFADRDMFCAGRVPEEDLKRTMMACGGSI	4502	P	4	7287		0.999859	0.00195263	54.66	48.88	54.66	-0.76722	148930000	0.999859	NaN	NaN	54.66	NaN	NaN
Q99832	3	Q99832	Q99832	T-complex protein 1 subunit eta	CCT7	_____________MMPTPVILLKEGTDSSQG	4503	P	2	7287		0.996321	0.0132735	57.59	37.803	57.59	-0.82755	30569000	NaN	NaN	0.996321	NaN	NaN	57.59
Q9BPU6	242	Q9BPU6	Q9BPU6	Dihydropyrimidinase-related protein 5	DPYSL5	EATHRVITIANRTHCPIYLVNVSSISAGDVI	4510	P	3	7312		1	0.000159579	75.773	71.505	75.773	1.0373	4593400	1	NaN	NaN	75.773	NaN	NaN
Q9BPZ7	192	Q9BPZ7	Q9BPZ7	Target of rapamycin complex 2 subunit MAPKAP1	MAPKAP1	IDVYLPLHSSQDRLLPMTVVTMASARVQDLI	4514	P	3	7321		1	0.0314544	53.967	35.554	53.967	1.1009	3539600	NaN	NaN	1	NaN	NaN	53.967
Q9BQ67	190	Q9BQ67	Q9BQ67	Glutamate-rich WD repeat-containing protein 1	GRWD1	VEVFALRRLLQVVEEPQALAAFLRDEQAQMK	4517	P	3	7330		1	0.0324672	54.637	40.906	54.637	2.0602	47977000	1	NaN	NaN	54.637	NaN	NaN
Q9BQ67	16	Q9BQ67	Q9BQ67	Glutamate-rich WD repeat-containing protein 1	GRWD1	MAARKGRRRTCETGEPMEAESGDTSSEGPAQ	4519	P	4	7330		1	8.48771e-05	94.75	92.983	94.75	1.1087	31874000	1	NaN	NaN	94.75	NaN	NaN
Q9BQG0	992	Q9BQG0	Q9BQG0	Myb-binding protein 1A	MYBBP1A	VYSTALSSFLTKRNSPLTVPMFLSLFSRHPV	4532	P	6	7351		0.541775	1.11271e-05	50.253	50.182	50.253	0.49591	78999000	0.541775	NaN	NaN	50.253	NaN	NaN
Q9BR76	429	Q9BR76	Q9BR76	Coronin-1B	CORO1B	DSRPAMAPGSSHLGAPASTTTAADATPSGSL	4537	P	5	7366		0.703368	0.000483636	42.024	37.118	42.024	-1.861	18279000	0.703368	NaN	0	42.024	NaN	NaN
Q9BRJ6	137	Q9BRJ6	Q9BRJ6	Uncharacterized protein C7orf50	C7orf50	RQTWLLLHMYDSDKVPDEHFSTLLAYLEGLQ	4538	P	3	7376		1	0.0152505	49.001	43.056	49.001	-2.8528	0	NaN	NaN	1	NaN	NaN	49.001
Q9BRS8	342	Q9BRS8	Q9BRS8	La-related protein 6	LARP6	LQYMGDESSANSSSDPESNPTSPMAGRRHAA	4542	P	4	7394		0.785894	9.46469e-07	66.201	66.201	66.201	-1.0682	11348000	0.785894	NaN	NaN	66.201	NaN	NaN
Q9BRT2	50	Q9BRT2	Q9BRT2	Ubiquinol-cytochrome-c reductase complex assembly factor 2	UQCC2	VAQAFREGENTQVAEPEACDQMYESLARLHS	4543	P	3	7395		1	0.00510129	59.691	53.787	59.691	-0.46302	24122000	1	NaN	NaN	59.691	NaN	NaN
Q9BRT6	94	Q9BRT6	Q9BRT6	Protein LLP homolog	LLPH	IKRNKKTLLDQHGQYPIWMNQRQRKRLKAKR	4544	P	2	7397		1	0.0186397	97.911	76.66	97.911	-0.18512	76663000	1	NaN	NaN	97.911	NaN	NaN
Q9BRX2	20	Q9BRX2	Q9BRX2	Protein pelota homolog	PELO	RKNIEKDNAGQVTLVPEEPEDMWHTYNLVQV	4545	P	4	7401		1	7.13367e-07	62.605	54.672	62.605	-2.7551	31171000	1	NaN	NaN	62.605	NaN	NaN
Q9BRX2	23	Q9BRX2	Q9BRX2	Protein pelota homolog	PELO	IEKDNAGQVTLVPEEPEDMWHTYNLVQVGDS	4546	P	4	7401		1	7.13367e-07	62.605	54.672	62.605	-2.7551	31171000	1	NaN	NaN	62.605	NaN	NaN
Q9BSC4	322	Q9BSC4	Q9BSC4	Nucleolar protein 10	NOL10	TSLEPEHDLNDVCLYPNSGMLLTANETPKMG	4549	P	3	7414		0.996703	0.000678753	49.088	38.759	49.087	-0.46418	73201000	0.996703	NaN	NaN	49.088	NaN	NaN
Q9BSM1	228	Q9BSM1	Q9BSM1	Polycomb group RING finger protein 1	PCGF1	LNPQHVQLLFDNEVLPDHMTMKQIWLSRWFG	4557	P	4	7430		0.998968	0.00170687	52.853	52.853	52.853	-0.29237	39136000	NaN	NaN	0.998968	NaN	NaN	52.853
Q9BTC8	161	Q9BTC8	Q9BTC8	Metastasis-associated protein MTA3	MTA3	DKGEIRVGPRYQADIPEMLLEGESDEREQSK	4567	P	4	7456		1	0.000741236	70.533	59.927	70.533	-1.3501	49835000	1	NaN	NaN	70.533	NaN	NaN
Q9BTD8	111	Q9BTD8	Q9BTD8	RNA-binding protein 42	RBM42	QQTLEARAAAAATVVPPMVGGPPFVGPVGFG	4568	P	4	7457		0.548534	4.18819e-07	89.129	84.073	89.129	-1.947	59080000	NaN	NaN	0.548534	NaN	NaN	89.129
Q9BTE7	221	Q9BTE7	Q9BTE7	DCN1-like protein 5	DCUN1D5	TVHADLSNYDEDGAWPVLLDEFVEWQKVRQT	4574	P	3	7462		1	0.000148449	78.653	76.309	78.653	-4.3449	21910000	NaN	NaN	1	NaN	NaN	78.653
Q9BTU6	447	Q9BTU6	Q9BTU6	Phosphatidylinositol 4-kinase type 2-alpha	PI4K2A	QALKDNKSPLHLVQMPPVIVETARSHQRSSS	4576	P	5	7473		0.503111	0.00318581	42.181	40.673	42.181	-0.0025215	156660000	0.503111	NaN	NaN	42.181	NaN	NaN
Q9BTV5	266	Q9BTV5	Q9BTV5	Fibronectin type III and SPRY domain-containing protein 1	FSD1	KAVAGEFSEPVTLETPAFMFRLDASTSHQNL	4578	P	2	7475		0.999967	0.0113626	88.275	76.483	80.522	-0.62092	56928000	0.999967	NaN	NaN	88.275	NaN	NaN
Q9BTW9	767	Q9BTW9	Q9BTW9	Tubulin-specific chaperone D	TBCD	IQEELITQYLAELRNPEEMTRCGFSLALGAL	4580	P	3	7478		0.999994	0.000653597	63.361	58.149	62.374	0.49013	23523000	0.999982	NaN	0.999994	63.361	NaN	62.374
Q9BTX1	472	Q9BTX1	Q9BTX1	Nucleoporin NDC1	NDC1	NRMAGIFDVNTCYGSPQSPQLIRRGPRLWTS	4582	P	3	7479		0.992578	0.0324987	41.513	36.646	41.513	-0.039731	3059700	0.992578	NaN	NaN	41.513	NaN	NaN
Q9BTX1	423	Q9BTX1	Q9BTX1	Nucleoporin NDC1	NDC1	EETAFQTPKSSQMPRPSVPPLVKTSLFSSKL	4583	P	2	7479		0.592234	0.0238248	79.741	44.853	79.741	1.8653	0	NaN	NaN	0.592234	NaN	NaN	79.741
Q9BU23	695	Q9BU23	Q9BU23	Lipase maturation factor 2	LMF2	KDSGAASEQATAAPNPCSSSSRTTRRKK___	4584	P	3	7486		0.759943	0.00763208	53.359	52.214	53.359	0.76219	9168400	0.759943	NaN	NaN	53.359	NaN	NaN
Q9BU70	422	Q9BU70	Q9BU70	Nef-associated protein 1	C9orf156	TCWFGDGFAEVLRIKPASEPVHMTGPVGSLV	4585	P	3	7489		0.654745	0.00665599	66.644	48.106	66.644	1.0864	37610000	NaN	NaN	0.654745	NaN	NaN	66.644
Q9BUA3	361	Q9BUA3	Q9BUA3	Uncharacterized protein C11orf84	C11orf84	PQGTKRVGAGDTSDWPTVLSESSTTVAGKPE	4586	P	4	7493		0.999913	0.0150132	42.659	35.936	42.659	-2.8664	21674000	0.999913	NaN	NaN	42.659	NaN	NaN
Q9BUL5	148	Q9BUL5	Q9BUL5	PHD finger protein 23	PHF23	LKDSLFDLDGPKVASPLSPTSLTHTSRPPAA	4591	P	4	7506		0.980669	0.000317778	46.608	41.342	46.608	-0.92321	132610000	NaN	NaN	0.980669	NaN	NaN	46.608
Q9BUL5	151	Q9BUL5	Q9BUL5	PHD finger protein 23	PHF23	SLFDLDGPKVASPLSPTSLTHTSRPPAALTP	4592	P	4	7506		0.980669	0.000317778	46.608	41.342	46.608	-0.92321	132610000	NaN	NaN	0.980669	NaN	NaN	46.608
Q9BUL5	160	Q9BUL5	Q9BUL5	PHD finger protein 23	PHF23	VASPLSPTSLTHTSRPPAALTPVPLSQGDLS	4593	P	4	7506		0.981347	0.000317778	46.608	41.342	46.608	-0.92321	132610000	NaN	NaN	0.981347	NaN	NaN	46.608
Q9BUL5	161	Q9BUL5	Q9BUL5	PHD finger protein 23	PHF23	ASPLSPTSLTHTSRPPAALTPVPLSQGDLSH	4594	P	4	7506		0.981347	0.000317778	46.608	41.342	46.608	-0.92321	132610000	NaN	NaN	0.981347	NaN	NaN	46.608
Q9BUL5	166	Q9BUL5	Q9BUL5	PHD finger protein 23	PHF23	PTSLTHTSRPPAALTPVPLSQGDLSHPPRKK	4595	P	4	7506		0.981347	0.000317778	46.608	41.342	46.608	-0.92321	132610000	NaN	NaN	0.981347	NaN	NaN	46.608
Q9BUR5	107	Q9BUR5	Q9BUR5	Apolipoprotein O	APOO	LVQWGLDSYDYLQNAPPGFFPRLGVIGFAGL	4599	P	2	7515		0.86846	0.00364838	73.022	62.168	73.022	-4.0554	0	NaN	NaN	0.86846	NaN	NaN	73.022
Q9BV38	332	Q9BV38	Q9BV38	WD repeat-containing protein 18	WDR18	AILLAPVSMLSSDFRPSLPLPHFNKHLLGAE	4600	P	3	7531		0.535419	0.000168256	65.248	60.036	65.248	0.23157	14181000	0.535419	NaN	NaN	65.248	NaN	NaN
Q9BV79	245	Q9BV79	Q9BV79	Trans-2-enoyl-CoA reductase, mitochondrial	MECR	SLGAEHVITEEELRRPEMKNFFKDMPQPRLA	4602	P	5	7537		1	0.00139086	85.046	68.294	40.179	-0.14373	860370000	1	NaN	1	60.034	NaN	85.046
Q9BW72	4	Q9BW72	Q9BW72	HIG1 domain family member 2A, mitochondrial	HIGD2A	____________MATPGPVIPEVPFEPSKPP	4610	P	2	7581		0.999603	0.00775393	43.544	23.902	43.544	-3.476	0	NaN	NaN	0.999603	NaN	NaN	43.544
Q9BW72	6	Q9BW72	Q9BW72	HIG1 domain family member 2A, mitochondrial	HIGD2A	__________MATPGPVIPEVPFEPSKPPVI	4611	P	2	7581		0.999603	0.00775393	43.544	23.902	43.544	-3.476	0	NaN	NaN	0.999603	NaN	NaN	43.544
Q9BW72	9	Q9BW72	Q9BW72	HIG1 domain family member 2A, mitochondrial	HIGD2A	_______MATPGPVIPEVPFEPSKPPVIEGL	4612	P	2	7581		0.999603	0.00775393	43.544	23.902	43.544	-3.476	0	NaN	NaN	0.999603	NaN	NaN	43.544
Q9BW72	12	Q9BW72	Q9BW72	HIG1 domain family member 2A, mitochondrial	HIGD2A	____MATPGPVIPEVPFEPSKPPVIEGLSPT	4613	P	2	7581		0.999603	0.00775393	43.544	23.902	43.544	-3.476	0	NaN	NaN	0.999603	NaN	NaN	43.544
Q9BWD1	141	Q9BWD1	Q9BWD1	Acetyl-CoA acetyltransferase, cytosolic	ACAT2	PHLAYLRTGVKIGEMPLTDSILCDGLTDAFH	4614	P	4	7587		1	0.00138303	42.865	39.641	42.865	-0.24502	64543000	1	NaN	NaN	42.865	NaN	NaN
Q9BWH6	1122	Q9BWH6	Q9BWH6	RNA polymerase II-associated protein 1	RPAP1	IRLYHRASDTPSGLSPTDTMGTAMRVLQWVL	4617	P	2	7595		0.998661	0.0214286	55.314	55.314	55.314	0.35852	7052000	NaN	NaN	0.998661	NaN	NaN	55.314
Q9BWH6	599	Q9BWH6	Q9BWH6	RNA polymerase II-associated protein 1	RPAP1	LECPRLIETIVREFLPTSWSPVGAGPTPSLY	4618	P	3	7595		0.914167	0.0135648	53.754	26.072	45.511	-2.9261	344610000	0.860711	NaN	0.914167	45.332	NaN	53.754
Q9BWH6	617	Q9BWH6	Q9BWH6	RNA polymerase II-associated protein 1	RPAP1	WSPVGAGPTPSLYKVPCATAMKLLRVLASAG	4619	P	3	7595		0.962098	0.0331901	45.332	38.457	45.332	-3.7785	0	0.962098	NaN	NaN	45.332	NaN	NaN
Q9BWH6	294	Q9BWH6	Q9BWH6	RNA polymerase II-associated protein 1	RPAP1	EQRPGGPSANVTKEEPLMSAFASEPRKRDKL	4624	P	5	7595		0.996757	9.60344e-31	152.31	145.45	152.31	-0.91924	100160000	0.996757	0	0.333199	152.31	NaN	42.015
Q9BWJ5	75	Q9BWJ5	Q9BWJ5	Splicing factor 3B subunit 5	SF3B5	SKARVRFNLMEKMLQPCGPPADKPEEN____	4625	P	2	7596		0.983687	0.0245342	81.525	72.795	72.152	-0.78361	672960000	0.983687	NaN	NaN	81.525	NaN	NaN
Q9BWT1	195	Q9BWT1	Q9BWT1	Cell division cycle-associated protein 7	CDCA7	LTRSRSRILGSLDALPMEEEEEEDKYMLVRK	4627	P	3	7604		1	0.00398782	48.315	39.106	48.315	0.30994	0	NaN	NaN	1	NaN	NaN	48.315
Q9BWT3	313	Q9BWT3	Q9BWT3	Poly(A) polymerase gamma	PAPOLG	VWDPRVNPSDRYHLMPIITPAYPQQNSTYNV	4628	P	4	7605		0.507576	0.000137624	58.137	52.925	58.137	0.78855	12673000	NaN	NaN	0.507576	NaN	NaN	58.137
Q9BXP5	556	Q9BXP5	Q9BXP5	Serrate RNA effector molecule homolog	SRRT	EPGTPPLPTSLPSQNPILKNITDYLIEEVSA	4638	P	3	7636		0.628519	0.000717752	49.944	45.276	49.944	1.6445	33426000	0.628519	NaN	0	49.944	NaN	NaN
Q9BXS5	147	Q9BXS5	Q9BXS5	AP-1 complex subunit mu-1	AP1M1	QEYITQEGHKLETGAPRPPATVTNAVSWRSE	4641	P	4	7639		0.666667	0.00283242	50.757	43.926	50.757	0.12194	7969500	0.666667	NaN	NaN	50.757	NaN	NaN
Q9BXS5	149	Q9BXS5	Q9BXS5	AP-1 complex subunit mu-1	AP1M1	YITQEGHKLETGAPRPPATVTNAVSWRSEGI	4642	P	3	7639		0.98005	0.00283242	57.173	28.962	57.173	0.086076	24495000	0.98005	NaN	NaN	57.173	NaN	NaN
Q9BXS5	150	Q9BXS5	Q9BXS5	AP-1 complex subunit mu-1	AP1M1	ITQEGHKLETGAPRPPATVTNAVSWRSEGIK	4643	P	3	7639		0.98005	0.00283242	57.173	28.962	57.173	0.086076	24495000	0.98005	NaN	NaN	57.173	NaN	NaN
Q9BXW7	395	Q9BXW7	Q9BXW7	Cat eye syndrome critical region protein 5	CECR5	GGEPPFHGHRDLCFSPGLMEASHVVNDVNEA	4645	P	4	7644		1	0.000229178	64.733	62.649	64.733	0.28002	1152200000	1	NaN	NaN	64.733	NaN	NaN
Q9BXW7	141	Q9BXW7	Q9BXW7	Cat eye syndrome critical region protein 5	CECR5	FSEYHEKRMLVSGQGPVMENAQGLGFRNVVT	4647	P	3	7644		1	0.0112015	55.437	49.32	42.913	0.52181	21012000	1	NaN	1	42.913	NaN	55.437
Q9BXW7	280	Q9BXW7	Q9BXW7	Cat eye syndrome critical region protein 5	CECR5	KVTGKELRYEGLMGKPSILTYQYAEDLIRRQ	4648	P	3	7644		1	0.000946739	70.99	67.463	70.99	-0.081471	24252000	1	NaN	NaN	70.99	NaN	NaN
Q9BY67	243	Q9BY67	Q9BY67	Cell adhesion molecule 1	CADM1	TGNLQTQRYLEVQYKPQVHIQMTYPLQGLTR	4650	P	2	7658		0.998585	0.0259688	81.311	69.165	81.311	-0.10824	13086000	NaN	NaN	0.998585	NaN	NaN	81.311
Q9BY89	111	Q9BY89	Q9BY89	Uncharacterized protein KIAA1671	KIAA1671	GLSEEPAAKDLDNRMPGLVGQEVGSGEGPRT	4652	P	3	7661		0.999998	0.0022306	64.87	55.939	64.87	-0.31272	39201000	NaN	NaN	0.999998	NaN	NaN	64.87
Q9BYT8	672	Q9BYT8	Q9BYT8	Neurolysin, mitochondrial	NLN	MNPEVGMKYRNLILKPGGSLDGMDMLHNFLK	4655	P	3	7682		1	0.0115449	50.883	24.074	50.883	-0.24703	30491000	1	NaN	NaN	50.883	NaN	NaN
Q9BZE1	261	Q9BZE1	Q9BZE1	39S ribosomal protein L37, mitochondrial	MRPL37	EATKNHVLETFYPISPIIDLHECNIYDVKND	4659	P	4	7696		0.791352	0.00514747	47.281	44.873	47.281	1.4473	10837000	0.791352	NaN	NaN	47.281	NaN	NaN
Q9BZL4	296	Q9BZL4	Q9BZL4	Protein phosphatase 1 regulatory subunit 12C	PPP1R12C	EHGGGMDSLTHAGQRPCDLADEEVLSLLEEL	4664	P	5	7713		1	6.93535e-09	70.08	65.592	70.08	0.080216	52953000	1	NaN	NaN	70.08	NaN	NaN
Q9C0D3	641	Q9C0D3	Q9C0D3	Protein zyg-11 homolog B	ZYG11B	SLLDDLHSAILKWPTPECEMVAYRSFNPFFP	4679	P	4	7748		0.929596	0.000482497	66.868	60.902	53.998	0.065506	62100000	0.929596	NaN	NaN	66.868	NaN	NaN
Q9GZL7	378	Q9GZL7	Q9GZL7	Ribosome biogenesis protein WDR12	WDR12	LDNIVKLWDTRSCKAPLYDLAAHEDKVLSVD	4689	P	5	7763		1	4.55855e-07	68.619	55.754	68.619	-4.0734	33958000	1	NaN	NaN	68.619	NaN	NaN
Q9GZS1	7	Q9GZS1	Q9GZS1	DNA-directed RNA polymerase I subunit RPA49	POLR1E	_________MAAEVLPSARWQYCGAPDGSQR	4694	P	2	7777		1	0.0123183	79.597	35.15	42.599	0.26409	34950000	1	NaN	NaN	79.597	NaN	NaN
Q9GZS3	106	Q9GZS3	Q9GZS3	WD repeat-containing protein 61;WD repeat-containing protein 61, N-terminally processed	WDR61	WDLENGKQIKSIDAGPVDAWTLAFSPDSQYL	4695	P	3	7778		1	0.00259146	62.108	49.195	44.301	-4.0058	147390000	1	NaN	1	62.108	NaN	44.301
Q9GZS3	116	Q9GZS3	Q9GZS3	WD repeat-containing protein 61;WD repeat-containing protein 61, N-terminally processed	WDR61	SIDAGPVDAWTLAFSPDSQYLATGTHVGKVN	4696	P	3	7778		1	0.00259146	62.108	49.195	44.301	-4.0058	147390000	1	NaN	1	62.108	NaN	44.301
Q9H0A8	153	Q9H0A8	Q9H0A8	COMM domain-containing protein 4	COMMD4	VDYTLSSSLLQSVEEPMVHLRLEVAAAPGTP	4701	P	3	7810		1	3.21103e-10	128.38	115.75	128.38	-0.2045	198240000	NaN	NaN	1	NaN	NaN	128.38
Q9H0D6	201	Q9H0D6	Q9H0D6	5'-3' exoribonuclease 2	XRN2	PGWKNLTVILSDASAPGEGEHKIMDYIRRQR	4704	P	3	7815		1	0.00354423	70.315	59.015	70.315	-0.25809	14817000	NaN	NaN	1	NaN	NaN	70.315
Q9H0H0	676	Q9H0H0	Q9H0H0	Integrator complex subunit 2	INTS2	ALLANTKTLAAMQRKPKSYSSSLMDQIPIKF	4706	P	2	7822		1	0.0328577	69.346	20.348	69.346	-3.6416	24201000	NaN	NaN	1	NaN	NaN	69.346
Q9H0H0	688	Q9H0H0	Q9H0H0	Integrator complex subunit 2	INTS2	QRKPKSYSSSLMDQIPIKFLIRQAQGLQQEL	4707	P	2	7822		1	0.0328577	69.346	20.348	69.346	-3.6416	24201000	NaN	NaN	1	NaN	NaN	69.346
Q9H0L4	9	Q9H0L4	Q9H0L4	Cleavage stimulation factor subunit 2 tau variant	CSTF2T	_______MSSLAVRDPAMDRSLRSVFVGNIP	4715	P	2	7829		1	0.00071871	111.61	84.821	111.61	0.014782	425510000	NaN	NaN	1	NaN	NaN	111.61
Q9H0R4	110	Q9H0R4	Q9H0R4	Haloacid dehalogenase-like hydrolase domain-containing protein 2	HDHD2	DDRALPDFKGIQTSDPNAVVMGLAPEHFHYQ	4717	P	4	7835		0.996062	0.0023188	45.596	43.565	45.596	-1.5275	30663000	0.996062	NaN	NaN	45.596	NaN	NaN
Q9H0W9	227	Q9H0W9	Q9H0W9	Ester hydrolase C11orf54	C11orf54	GKVKSHIMPAEFSSCPLNSDEEVNKWLHFYE	4724	P	3	7847		0.994058	0.0170996	46.786	43.124	46.786	0.75029	35488000	0.994058	NaN	NaN	46.786	NaN	NaN
Q9H211	319	Q9H211	Q9H211	DNA replication factor Cdt1	CDT1	EHVKEHHKAFLASLSPAMVVPEDQLTRWHPR	4729	P	2	7885		0.999841	0.00012205	119.25	106.69	115.57	0.16338	16991000	NaN	NaN	0.999841	NaN	NaN	119.25
Q9H2C0	256	Q9H2C0	Q9H2C0	Gigaxonin	GAN	VREIVKECSNIPLSQPQQGEAMLANFKPRGY	4730	P	4	7893		0.987944	0.00383217	51.507	41.449	51.507	0.28837	49531000	0.987944	NaN	NaN	51.507	NaN	NaN
Q9H2G4	4	Q9H2G4	Q9H2G4	Testis-specific Y-encoded-like protein 2	TSPYL2	____________MDRPDEGPPAKTRRLSSSE	4733	P	2	7900		0.999986	0.0190869	70.056	53.854	70.056	0.36981	12996000	NaN	NaN	0.999986	NaN	NaN	70.056
Q9H2H8	94	Q9H2H8	Q9H2H8	Peptidyl-prolyl cis-trans isomerase-like 3	PPIL3	LKHNVRGVVSMANNGPNTNGSQFFITYGKQP	4734	P	4	7902		0.999933	1.61279e-05	71.085	65.305	71.085	1.3494	39445000	NaN	NaN	0.999933	NaN	NaN	71.085
Q9H2P0	263	Q9H2P0	Q9H2P0	Activity-dependent neuroprotector homeobox protein	ADNP	GYQVTAMIGHTNVVVPRSKPLMLIAPKPQDK	4736	P	5	7910		1	6.14906e-05	53.615	45.069	53.615	-2.3202	45245000	NaN	NaN	1	NaN	NaN	53.615
Q9H2U1	523	Q9H2U1	Q9H2U1	ATP-dependent RNA helicase DHX36	DHX36	LMSQVMFKSDKFLIIPLHSLMPTVNQTQVFK	4737	P	4	7913		0.90171	0.00119386	64.954	59.976	50.029	-0.60939	112750000	NaN	NaN	0.90171	NaN	NaN	64.954
Q9H2U1	529	Q9H2U1	Q9H2U1	ATP-dependent RNA helicase DHX36	DHX36	FKSDKFLIIPLHSLMPTVNQTQVFKRTPPGV	4738	P	5	7913		0.979407	0.00045716	64.152	61.575	64.152	0.0035177	48969000	NaN	NaN	0.979407	NaN	NaN	64.152
Q9H307	550	Q9H307	Q9H307	Pinin	PNN	VKLTEVPVEPVLTVHPESKSKTKTRSRSRGR	4744	P	3	7920		0.99995	0.000291004	96.208	89.94	96.208	0.51658	32998000	0.99995	NaN	NaN	96.208	NaN	NaN
Q9H3P7	328	Q9H3P7	Q9H3P7	Golgi resident protein GCP60	ACBD3	AGSSLPTSSKVNATVPSNMMSVNGQAKTHTD	4749	P	2	7940		1	0.00618454	73.848	57.958	53.967	-0.71363	100850000	1	NaN	1	73.848	NaN	53.967
Q9H3U1	721	Q9H3U1	Q9H3U1	Protein unc-45 homolog A	UNC45A	TKAAQALAKLTITSNPEMTFPGERIYEVVRP	4753	P	2	7947		0.995636	0.0286455	97.214	86.691	97.214	-0.31239	19306000	0.995636	NaN	NaN	97.214	NaN	NaN
Q9H467	234	Q9H467	Q9H467	CUE domain-containing protein 2	CUEDC2	KYMMVDSAEDQKIHRPMAPKEAPKKLIRYID	4755	P	4	7958		0.560289	0.00431139	57.173	54.524	57.173	-0.33106	60693000	NaN	NaN	0.560289	NaN	NaN	57.173
Q9H4A3	2288	Q9H4A3	Q9H4A3	Serine/threonine-protein kinase WNK1	WNK1	HMNYEGPGMARKFSAPGQLCISMTSNLGGSA	4759	P	4	7965		0.961184	0.000514541	51.868	46.548	51.868	-1.7284	21681000	0.961184	NaN	NaN	51.868	NaN	NaN
Q9H4L4	557	Q9H4L4	Q9H4L4	Sentrin-specific protease 3	SENP3	HLALSQPFSFTQQDMPKLRRQIYKELCHCKL	4762	P	3	7979		0.999997	0.00374289	72.797	61.753	72.797	0.7063	505080000	0.999164	NaN	0.999997	66.965	NaN	72.797
Q9H4L7	405	Q9H4L7	Q9H4L7	SWI/SNF-related matrix-associated actin-dependent regulator of chromatin subfamily A containing DEAD/H box 1	SMARCAD1	LHFLQDASIGELTLIPQCSQKKAQKITELRP	4764	P	3	7981		1	0.0188124	48.053	35.251	48.053	0.22289	13679000	1	NaN	NaN	48.053	NaN	NaN
Q9H4M9	92	Q9H4M9	Q9H4M9	EH domain-containing protein 1	EHD1	HLIEQDFPGMRIGPEPTTDSFIAVMHGPTEG	4771	P	4	7983		0.516858	0.00123058	46.149	44.144	46.149	-0.03816	184200000	0.516858	NaN	NaN	46.149	NaN	NaN
Q9H5Q4	196	Q9H5Q4	Q9H5Q4	Dimethyladenosine transferase 2, mitochondrial	TFB2M	VPWTADIPLKVVGMFPSRGEKRALWKLAYDL	4776	P	4	8000		0.936941	0.00306827	54.441	45.707	54.441	1.3788	28051000	NaN	NaN	0.936941	NaN	NaN	54.441
Q9H5Z1	420	Q9H5Z1	Q9H5Z1	Probable ATP-dependent RNA helicase DHX35	DHX35	LYTEEAFDKLPQSTVPEMQRSNLAPVILQLK	4777	P	3	8004		0.997357	8.18462e-05	102.07	88.203	102.07	-0.11975	58772000	NaN	NaN	0.997357	NaN	NaN	102.07
Q9H6R4	945	Q9H6R4	Q9H6R4	Nucleolar protein 6	NOL6	QVEIRSGFLAARAQLPVMVIVTPQDRKNSVW	4778	P	3	8028		0.999977	0.0347026	75.383	75.383	75.383	0.13774	469240000	0.999977	NaN	NaN	75.383	NaN	NaN
Q9H6S0	789	Q9H6S0	Q9H6S0	Probable ATP-dependent RNA helicase YTHDC2	YTHDC2	QELCLHTKLLAPVNCPIADFLMKAPEPPPAL	4782	P	3	8031		0.956454	0.0176875	56.303	53.261	56.303	0.3251	81558000	NaN	NaN	0.956454	NaN	NaN	56.303
Q9H6U8	513	Q9H6U8	Q9H6U8	Alpha-1,2-mannosyltransferase ALG9	ALG9	LPKPFAEGPLATRIVPTDMNDQNLEEPSRYI	4784	P	2	8037		1	0.00845022	106.49	80.449	106.49	-0.53215	40997000	NaN	NaN	1	NaN	NaN	106.49
Q9H7N4	884	Q9H7N4	Q9H7N4	Splicing factor, arginine/serine-rich 19	SCAF1	DRESRSPFLKPDERAPTEMAKAAPGSTKPKK	4800	P	4	8065		0.925778	0.0131944	61.265	41.967	61.265	-0.53546	25562000	0.925778	NaN	NaN	61.265	NaN	NaN
Q9H7Z7	323	Q9H7Z7	Q9H7Z7	Prostaglandin E synthase 2;Prostaglandin E synthase 2 truncated form	PTGES2	YEAADKWVAAVGKDRPFMGGQKPNLADLAVY	4803	P	3	8076		0.992045	9.88957e-05	93.73	86.699	93.73	-0.0043773	383830000	0.992045	NaN	0.990237	93.73	NaN	78.975
Q9H7Z7	190	Q9H7Z7	Q9H7Z7	Prostaglandin E synthase 2;Prostaglandin E synthase 2 truncated form	PTGES2	YLVSGQPLEEIITYYPAMKAVNEQGKEVTEF	4804	P	3	8076		0.999829	0.0115818	51.819	43.73	51.819	-1.2313	175490000	0.999829	NaN	0.999553	51.819	NaN	48.656
Q9H857	167	Q9H857	Q9H857	5'-nucleotidase domain-containing protein 2	NT5DC2	PDEEVIELYGGTQHIPLYQMSGFYGKGPSIK	4806	P	3	8085		0.999987	1.80164e-05	68.101	62.942	68.101	-0.39205	280280000	0.999987	NaN	0.993841	68.101	NaN	40.986
Q9H8M5	641	Q9H8M5	Q9H8M5	Metal transporter CNNM2	CNNM2	LAMHRFLATEVEAFSPSQMSEKILLRLLKHP	4808	P	2	8101		1	0.00738084	106.49	90.142	106.49	0.25573	12647000	NaN	NaN	1	NaN	NaN	106.49
Q9H910	20	Q9H910	Q9H910	Hematological and neurological expressed 1-like protein	HN1L	PDSEGGRAGSRAMKPPGGESSNLFGSPEEAT	4810	P	5	8116		0.524378	4.21162e-05	77.19	70.832	45.972	-1.3697	92443000	0.498323	NaN	0.524378	77.19	NaN	48.337
Q9H981	389	Q9H981	Q9H981	Actin-related protein 8	ACTR8	ALLYQFRLGDEKLQAPMALFYPATFGIVGQK	4813	P	3	8124		0.999971	0.00606727	64.68	57.234	64.68	1.4708	67150000	NaN	NaN	0.999971	NaN	NaN	64.68
Q9H9B4	98	Q9H9B4	Q9H9B4	Sideroflexin-1	SFXN1	TGEKMILIGRMSAQVPMNMTITGCMMTFYRT	4819	P	3	8132		1	0.000501713	64.723	61.799	58.997	-0.47922	54812000	1	NaN	NaN	64.723	NaN	NaN
Q9H9J4	870	Q9H9J4	Q9H9J4	Ubiquitin carboxyl-terminal hydrolase 42	USP42	LSPAPPARSEEPCEQPLLVHPSGDHARDAQD	4827	P	4	8141		0.629215	3.34827e-06	51.166	43.907	51.166	-2.8263	87048000	0.629215	NaN	NaN	51.166	NaN	NaN
Q9H9Y6	903	Q9H9Y6	Q9H9Y6	DNA-directed RNA polymerase I subunit RPA2	POLR1B	GQKGILSRLWPAEDMPFTESGMVPDILFNPH	4830	P	3	8157		0.988048	0.00530919	91.389	91.389	91.389	-1.1195	172430000	0.944931	NaN	0.988048	43.612	NaN	91.389
Q9HAS0	68	Q9HAS0	Q9HAS0	Protein Njmu-R1	C17orf75	GDSEDGSPSGTNAETPSGDDFSLSLADTNLP	4842	P	3	8178		0.79769	0.000285028	45.192	43.374	45.192	2.855	7726400	NaN	NaN	0.79769	NaN	NaN	45.192
Q9HAU5	1189	Q9HAU5	Q9HAU5	Regulator of nonsense transcripts 2	UPF2	LTRKGNKQQFKILNVPMSSQLAANHWNQQQA	4843	P	3	8183		1	3.65783e-20	155.76	149.87	155.76	1.9148	14520000	1	NaN	NaN	155.76	NaN	NaN
Q9HAV4	990	Q9HAV4	Q9HAV4	Exportin-5	XPO5	VCCVSKKGADHSSAPPADGDDEEMMATEVTP	4846	P	3	8185		0.726521	0.0167878	43.728	42.22	43.728	2.3665	8649900	0.726521	NaN	0	43.728	NaN	NaN
Q9HAV4	417	Q9HAV4	Q9HAV4	Exportin-5	XPO5	MTNLVKMGFPSKTDSPSCEYSRFDFDSDEDF	4849	P	3	8185		1	0.0140881	55.358	53.5	55.358	-1.374	33948000	1	NaN	NaN	55.358	NaN	NaN
Q9HC35	898	Q9HC35	Q9HC35	Echinoderm microtubule-associated protein-like 4	EML4	KAPVSSTESVIQSNTPTPPPSQPLNETAEEE	4858	P	3	8222		0.999989	6.86964e-07	62.213	57.681	62.213	-1.4466	44039000	0.999989	NaN	NaN	62.213	NaN	NaN
Q9HC35	900	Q9HC35	Q9HC35	Echinoderm microtubule-associated protein-like 4	EML4	PVSSTESVIQSNTPTPPPSQPLNETAEEESR	4859	P	3	8222		0.999989	6.86964e-07	62.213	57.681	62.213	-1.4466	44039000	0.999989	NaN	NaN	62.213	NaN	NaN
Q9HC35	901	Q9HC35	Q9HC35	Echinoderm microtubule-associated protein-like 4	EML4	VSSTESVIQSNTPTPPPSQPLNETAEEESRI	4860	P	3	8222		0.999989	6.86964e-07	62.213	57.681	62.213	-1.4466	44039000	0.999989	NaN	NaN	62.213	NaN	NaN
Q9HC35	902	Q9HC35	Q9HC35	Echinoderm microtubule-associated protein-like 4	EML4	SSTESVIQSNTPTPPPSQPLNETAEEESRIS	4861	P	3	8222		0.999989	6.86964e-07	62.213	57.681	62.213	-1.4466	44039000	0.999989	NaN	NaN	62.213	NaN	NaN
Q9HC35	905	Q9HC35	Q9HC35	Echinoderm microtubule-associated protein-like 4	EML4	ESVIQSNTPTPPPSQPLNETAEEESRISSSP	4862	P	3	8222		0.999973	6.86964e-07	62.213	57.681	62.213	-1.4466	44039000	0.999973	NaN	NaN	62.213	NaN	NaN
Q9HC36	220	Q9HC36	Q9HC36	rRNA methyltransferase 3, mitochondrial	RNMTL1	QHSLPLLLICDNLRDPGNLGTILRSAAGAGC	4865	P	4	8223		0.847605	0.000330595	65.801	60.081	65.801	1.3815	17242000	0.847605	NaN	NaN	65.801	NaN	NaN
Q9HCC0	166	Q9HCC0	Q9HCC0	Methylcrotonoyl-CoA carboxylase beta chain, mitochondrial	MCCC2	KKQLRAQEIAMQNRLPCIYLVDSGGAYLPRQ	4866	P	3	8232		0.996632	0.027325	42.806	36.579	42.806	0.83688	6713300	0.996632	NaN	NaN	42.806	NaN	NaN
Q9HCD5	527	Q9HCD5	Q9HCD5	Nuclear receptor coactivator 5	NCOA5	PSSRLAPASNMTSQRPVSSTGINFDNPSVQK	4868	P	3	8234		0.956026	0.0113995	57.432	45.235	57.432	0.51789	243670000	0.956026	NaN	NaN	57.432	NaN	NaN
Q9HCE1	252	Q9HCE1	Q9HCE1	Putative helicase MOV-10	MOV10	FLAAVAHSPLAAQLKPMTPFKRTRITGNPVV	4869	P	5	8237		0.976511	0.000644302	63.184	60.086	63.184	-0.78412	109220000	0.976511	NaN	NaN	63.184	NaN	NaN
Q9HCE5	167	Q9HCE5	Q9HCE5	N6-adenosine-methyltransferase subunit METTL14	METTL14	LIRLKDELIAKSNTPPMYLQADIEAFDIREL	4870	P	3	8239		0.804964	0.0291019	55.734	48.782	55.734	-0.96203	73302000	0.804964	NaN	NaN	55.734	NaN	NaN
Q9HCS7	761	Q9HCS7	Q9HCS7	Pre-mRNA-splicing factor SYF1	XAB2	LKVSGSATGTVSDLAPGQSGMDDMKLLEQRA	4879	P	3	8266		1	0.0116059	46.982	44.016	40.428	0.43576	127620000	1	NaN	1	46.982	NaN	40.428
Q9HD15	61	Q9HD15	Q9HD15	Steroid receptor RNA activator 1	SRA1	DGSPRVPASETSPGPPPMGPPPPSSKAPRSP	4880	P	2	8271		0.552148	0.000235238	96.464	80.523	96.464	0.064042	17622000	0.552148	NaN	NaN	96.464	NaN	NaN
Q9HD15	62	Q9HD15	Q9HD15	Steroid receptor RNA activator 1	SRA1	GSPRVPASETSPGPPPMGPPPPSSKAPRSPP	4881	P	3	8271		0.975885	0.000106433	80.752	67.05	80.752	-0.13162	267700000	0.975885	NaN	0.922198	80.752	NaN	74.047
Q9HD26	265	Q9HD26	Q9HD26	Golgi-associated PDZ and coiled-coil motif-containing protein	GOPC	KTVIRACRGRNDLKRPMQAPPGHDQDSLKKS	4884	P	3	8274		0.996756	0.0312113	77.222	63.181	77.222	0.37993	27653000	NaN	NaN	0.996756	NaN	NaN	77.222
Q9HD26	25	Q9HD26	Q9HD26	Golgi-associated PDZ and coiled-coil motif-containing protein	GOPC	AAGGGPGGASCSVGAPGGVSMFRWLEVLEKE	4885	P	3	8274		0.991268	0.00274331	40.986	36.082	40.986	-1.7861	26513000	0.991268	NaN	NaN	40.986	NaN	NaN
Q9HD45	427	Q9HD45	Q9HD45	Transmembrane 9 superfamily member 3	TM9SF3	VGTILGRNLSGQPNFPCRVNAVPRPIPEKKW	4886	P	2	8279		0.974058	0.0309289	116.73	108.69	116.73	-0.4094	92531000	0.974058	NaN	NaN	116.73	NaN	NaN
Q9NNW7	365	Q9NNW7	Q9NNW7	Thioredoxin reductase 2, mitochondrial	TXNRD2	SVPHIYAIGDVVEGRPELTPIAIMAGRLLVQ	4888	P	3	8285		0.579049	7.66859e-05	117.73	113.24	117.73	0.77361	117780000	NaN	0	0.579049	NaN	NaN	117.73
Q9NP81	276	Q9NP81	Q9NP81	Serine--tRNA ligase, mitochondrial	SARS2	PDLLRGAVFEGCGMTPNANPSQIYNIDPARF	4891	P	3	8298		0.890653	0.00204386	59.324	56.85	59.324	-1.0025	43680000	0.86685	NaN	0.890653	40.404	NaN	59.324
Q9NPE3	22	Q9NPE3	Q9NPE3	H/ACA ribonucleoprotein complex subunit 3	NOP10	LNEQGDRVYTLKKFDPMGQQTCSAHPARFSP	4892	P	3	8312		1	0.000655082	136.26	130.72	136.26	-0.24817	170030000	1	NaN	NaN	136.26	NaN	NaN
Q9NQS7	149	Q9NQS7	Q9NQS7	Inner centromere protein	INCENP	ATMALAAPSSPTPESPTMLTKKPEDNHTQCQ	4905	P	3	8366		0.942056	0.000252279	97.346	97.346	97.346	-0.47013	62606000	0.671144	NaN	0.942056	46.132	NaN	97.346
Q9NQS7	799	Q9NQS7	Q9NQS7	Inner centromere protein	INCENP	AGASKALNVTVDVQSPACTSYQMTPQGHRAP	4906	P	3	8366		0.984984	0.00496193	51.834	44.802	51.834	0.48474	17225000	NaN	NaN	0.984984	NaN	NaN	51.834
Q9NQS7	808	Q9NQS7	Q9NQS7	Inner centromere protein	INCENP	TVDVQSPACTSYQMTPQGHRAPPKINPDNYG	4907	P	3	8366		0.999994	2.48939e-27	160.57	139.94	160.57	-1.1402	142670000	0.999994	NaN	0.671486	160.57	NaN	51.586
Q9NQW7	101	Q9NQW7	Q9NQW7	Xaa-Pro aminopeptidase 1	XPNPEP1	MDSNWTLMKMGLKDTPTQEDWLVSVLPEGSR	4909	P	2	8372		0.999994	0.00257715	89.541	77.773	89.541	-2.8504	0	NaN	NaN	0.999994	NaN	NaN	89.541
Q9NQX3	606	Q9NQX3	Q9NQX3	Gephyrin;Molybdopterin adenylyltransferase;Molybdopterin molybdenumtransferase	GPHN	HAQIHFGRVFMKPGLPTTFATLDIDGVRKII	4911	P	4	8374		0.521261	0.0283493	40.381	31.72	40.381	-1.0021	18693000	NaN	NaN	0.521261	NaN	NaN	40.381
Q9NR30	163	Q9NR30	Q9NR30	Nucleolar RNA helicase 2	DDX21	PKLKNGFPHPEPDCNPSEAASEESNSEIEQE	4915	P	3	8390		0.7274	0.00265397	45.22	44.791	45.22	-1.0399	12777000	0.7274	NaN	NaN	45.22	NaN	NaN
Q9NR45	152	Q9NR45	Q9NR45	Sialic acid synthase	NANS	TNNFPYLEKTAKKGRPMVISSGMQSMDTMKQ	4918	P	3	8393		1	0.0128176	42.708	32.223	42.708	0.83817	0	NaN	NaN	1	NaN	NaN	42.708
Q9NR45	177	Q9NR45	Q9NR45	Sialic acid synthase	NANS	MDTMKQVYQIVKPLNPNFCFLQCTSAYPLQP	4919	P	3	8393		0.994912	0.00071447	67.364	64.484	67.364	0.97382	3664400	0.994912	NaN	NaN	67.364	NaN	NaN
Q9NR50	73	Q9NR50	Q9NR50	Translation initiation factor eIF-2B subunit gamma	EIF2B3	DVQKALCAEFKMKMKPDIVCIPDDADMGTAD	4921	P	3	8396		0.999724	0.00226874	67.364	59.831	67.364	-0.053064	99922000	0.997855	NaN	0.999724	55.985	NaN	67.364
Q9NR56	205	Q9NR56	Q9NR56	Muscleblind-like protein 1	MBNL1	RGNCNRGENDCRFAHPADSTMIDTNDNTVTV	4924	P	3	8397		1	0.0152365	41.208	40.244	41.208	0.54587	48542000	NaN	NaN	1	NaN	NaN	41.208
Q9NRF8	437	Q9NRF8	Q9NRF8	CTP synthase 2	CTPS2	TEFRPNAPVPLVIDMPEHNPGNLGGTMRLGI	4925	P	5	8409		0.974193	0.000150933	47.099	43.064	47.099	2.8889	49354000	0.974193	NaN	NaN	47.099	NaN	NaN
Q9NRF8	441	Q9NRF8	Q9NRF8	CTP synthase 2	CTPS2	PNAPVPLVIDMPEHNPGNLGGTMRLGIRRTV	4926	P	4	8409		0.988719	5.15812e-06	52.829	45.512	43.271	-1.2862	59348000	0.988719	NaN	NaN	52.829	NaN	NaN
Q9NRL2	862	Q9NRL2	Q9NRL2	Bromodomain adjacent to zinc finger domain protein 1A	BAZ1A	NVQSQDPQVSTKTGEPLMSESTSNIDQGPRD	4928	P	3	8421		1	0.00223452	71.558	67.316	71.558	0.95922	13876000	NaN	NaN	1	NaN	NaN	71.558
Q9NRP2	7	Q9NRP2	Q9NRP2	COX assembly mitochondrial protein 2 homolog	CMC2	_________MHPDLSPHLHTEECNVLINLLK	4929	P	5	8427		0.5718	0.000722681	65.521	62.909	65.521	-2.2086	120650000	0.5718	NaN	NaN	65.521	NaN	NaN
Q9NRR4	560	Q9NRR4	Q9NRR4	Ribonuclease 3	DROSHA	TGIRHSIYPGEEAIKPCRPMTNNAGRLFHYR	4930	P	4	8431		0.582542	0.00238589	56.304	49.192	56.304	-0.82595	27183000	0.582542	NaN	NaN	56.304	NaN	NaN
Q9NRR5	445	Q9NRR5	Q9NRR5	Ubiquilin-4	UBQLN4	FAGNPQLQEQLRLQLPVFLQQMQNPESLSIL	4931	P	3	8432		0.893989	0.0059003	51.645	48.955	51.645	1.2478	207860000	0.893989	NaN	NaN	51.645	NaN	NaN
Q9NRV9	50	Q9NRV9	Q9NRV9	Heme-binding protein 1	HEBP1	ACEGGKFATVEVTDKPVDEALREAMPKVAKY	4933	P	3	8436		0.917311	6.94882e-06	100.67	93.089	100.67	-0.11182	15624000	NaN	NaN	0.917311	NaN	NaN	100.67
Q9NRW3	8	Q9NRW3	Q9NRW3	DNA dC->dU-editing enzyme APOBEC-3C	APOBEC3C	________MNPQIRNPMKAMYPGTFYFQFKN	4934	P	2	8438		0.999938	0.0209698	78.516	78.516	78.516	-0.018597	51476000	0.999938	NaN	NaN	78.516	NaN	NaN
Q9NRW7	404	Q9NRW7	Q9NRW7	Vacuolar protein sorting-associated protein 45	VPS45	MLYALHYERHSSNSLPGLMMDLRNKGVSEKY	4935	P	3	8440		1	0.0277528	51.546	17.161	51.546	-1.4449	125800000	1	NaN	NaN	51.546	NaN	NaN
Q9NRZ9	123	Q9NRZ9	Q9NRZ9	Lymphoid-specific helicase	HELLS	KVKKGKNSIDASEEKPVMRKKRGREDESYNI	4939	P	3	8451		1	0.00595895	101.53	79.983	83.204	0.54626	319470000	1	NaN	1	99.011	NaN	101.53
Q9NS56	62	Q9NS56	Q9NS56	E3 ubiquitin-protein ligase Topors	TOPORS	LGCRELAASAPARPAPASSEIMASAAKEFKM	4940	P	3	8457		0.921837	0.00241521	72.564	63.194	72.564	0.43071	31363000	0.345969	NaN	0.921837	52.03	NaN	72.564
Q9NSE4	1003	Q9NSE4	Q9NSE4	Isoleucine--tRNA ligase, mitochondrial	IARS2	PRCWKYTAESSDTLCPRCAEVVSGK______	4942	P	2	8472		1	0.0201875	129.85	122.57	123.86	0.083276	350720000	1	NaN	NaN	129.85	NaN	NaN
Q9NT62	226	Q9NT62	Q9NT62	Ubiquitin-like-conjugating enzyme ATG3	ATG3	QTPRLWLFGYDEQRQPLTVEHMYEDISQDHV	4946	P	6	8482		1	0.000117763	58.877	57.235	58.877	0.19562	144140000	1	NaN	NaN	58.877	NaN	NaN
Q9NU22	5548	Q9NU22	Q9NU22	Midasin	MDN1	SRDSILDIKVPIFKGPGEMPEIRSYMEEFPF	4959	P	4	8496		0.8117	0.0166671	50.215	42.939	50.215	0.36616	118070000	0.8117	NaN	NaN	50.215	NaN	NaN
Q9NU22	1579	Q9NU22	Q9NU22	Midasin	MDN1	PGLCLGRIDPKGSDIPEVMLDFIDWLTHQEF	4960	P	4	8496		1	1.89935e-11	133.26	126.31	133.26	0.68292	243790000	1	NaN	NaN	133.26	NaN	NaN
Q9NU22	4161	Q9NU22	Q9NU22	Midasin	MDN1	AWARSKNPQEMLHLHPLDLQSALSIVSSTQE	4961	P	5	8496		0.542065	5.60347e-05	85.069	76.157	85.069	-1.9735	52826000	0.542065	NaN	NaN	85.069	NaN	NaN
Q9NUJ1	206	Q9NUJ1	Q9NUJ1	Mycophenolic acid acyl-glucuronide esterase, mitochondrial	ABHD10	VELKKEVEMKGVWSMPSKYSEEGVYNVQYSF	4963	P	2	8506		1	0.0131882	50.292	6.7802	50.292	-0.086509	0	NaN	NaN	1	NaN	NaN	50.292
Q9NUJ3	297	Q9NUJ3	Q9NUJ3	T-complex protein 11-like protein 1	TCP11L1	HALPVGGMAAGSGDMPRLSPVAVQNYAYLKL	4964	P	3	8507		0.993199	0.00408509	61.641	61.641	55.011	-0.95861	224080000	NaN	NaN	0.993199	NaN	NaN	61.641
Q9NUP9	97	Q9NUP9	Q9NUP9	Protein lin-7 homolog C	LIN7C	FAASEGHSHPRVVELPKTEEGLGFNIMGGKE	4965	P	3	8517		0.999585	0.00100434	70.799	61.171	70.799	1.4035	20381000	0.999585	NaN	NaN	70.799	NaN	NaN
Q9NUQ2	165	Q9NUQ2	Q9NUQ2	1-acyl-sn-glycerol-3-phosphate acyltransferase epsilon	AGPAT5	KEMRNKLQSYVDAGTPMYLVIFPEGTRYNPE	4966	P	3	8518		1	4.88689e-10	128.12	115.2	128.12	0.10976	129650000	NaN	NaN	1	NaN	NaN	128.12
Q9NUQ6	417	Q9NUQ6	Q9NUQ6	SPATS2-like protein	SPATS2L	AANPKMVSSLPSTADPSHQTMPANKQNGSSN	4969	P	3	8520		0.862108	0.0057317	54.368	54.368	54.368	-0.6208	11377000	NaN	NaN	0.862108	NaN	NaN	54.368
Q9NUQ6	423	Q9NUQ6	Q9NUQ6	SPATS2-like protein	SPATS2L	VSSLPSTADPSHQTMPANKQNGSSNQRRRFN	4970	P	3	8520		0.949001	0.00578819	54.253	54.253	54.253	0.35187	9501600	NaN	NaN	0.949001	NaN	NaN	54.253
Q9NV70	546	Q9NV70	Q9NV70	Exocyst complex component 1	EXOC1	DFISKFFKLQQHQSMPGTMAEAEDLDGGTLS	4974	P	3	8536		1	0.00445479	77.053	64.746	77.053	-0.43465	0	NaN	NaN	1	NaN	NaN	77.053
Q9NV88	249	Q9NV88	Q9NV88	Integrator complex subunit 9	INTS9	VSYVSGSSLLTTHPQPMDQASLKNSDVLVLT	4975	P	3	8539		0.838464	0.00332248	57.578	50.132	57.578	1.4157	10523000	0.838464	NaN	NaN	57.578	NaN	NaN
Q9NVP1	408	Q9NVP1	Q9NVP1	ATP-dependent RNA helicase DDX18	DDX18	ANATVDGLEQGYVVCPSEKRFLLLFTFLKKN	4982	P	2	8567		1	0.00211564	101.43	93.887	101.43	0.68253	17680000	1	NaN	NaN	101.43	NaN	NaN
Q9NVP1	309	Q9NVP1	Q9NVP1	ATP-dependent RNA helicase DDX18	DDX18	EAQKLGNGINIIVATPGRLLDHMQNTPGFMY	4983	P	4	8567		0.817954	0.00397287	45.862	45.862	45.862	-1.1295	131850000	NaN	NaN	0.817954	NaN	NaN	45.862
Q9NVS9	245	Q9NVS9	Q9NVS9	Pyridoxine-5'-phosphate oxidase	PNPO	IVFRRGLPTGDSPLGPMTHRGEEDWLYERLA	4986	P	4	8575		0.999078	1.06399e-06	111.67	105.31	111.67	-0.25192	325970000	0.999078	NaN	NaN	111.67	NaN	NaN
Q9NVU0	34	Q9NVU0	Q9NVU0	DNA-directed RNA polymerase III subunit RPC5	POLR3E	KSLAEKLYLFQYPVRPASMTYDDIPHLSAKI	4988	P	4	8577		0.970441	6.62952e-06	91.583	85.15	91.583	0.54116	69368000	NaN	NaN	0.970441	NaN	NaN	91.583
Q9NVV5	139	Q9NVV5	Q9NVV5	Androgen-induced gene 1 protein	AIG1	FIPGWLNHGMHTTVLPFILIEMRTSHHQYPS	4990	P	4	8581		0.997837	5.05832e-05	83.202	66.374	83.202	-0.23327	282760000	0.997837	NaN	0.971521	83.202	NaN	54.259
Q9NVX2	453	Q9NVX2	Q9NVX2	Notchless protein homolog 1	NLE1	LKVWDVKAQKLAMDLPGHADEVYAVDWSPDG	4992	P	2	8584		0.981675	0.0309802	47.201	35.225	47.201	-1.4236	0	0.981675	NaN	NaN	47.201	NaN	NaN
Q9NW08	718	Q9NW08	Q9NW08	DNA-directed RNA polymerase III subunit RPC2	POLR3B	NRIDTLMYLLAYPQKPMVKTKTIELIEFEKL	4995	P	4	8588		0.957076	0.00384417	67.995	59.176	64.83	0.41549	151000000	0.846953	NaN	0.957076	67.995	NaN	64.83
Q9NW75	185	Q9NW75	Q9NW75	G patch domain-containing protein 2	GPATCH2	DLPQDISNKRTMTQPPEGCRDQDMDSDRAYQ	4997	P	4	8594		0.814009	0.000277444	71.091	71.091	71.091	-2.086	17277000	NaN	NaN	0.814009	NaN	NaN	71.091
Q9NWQ8	323	Q9NWQ8	Q9NWQ8	Phosphoprotein associated with glycosphingolipid-enriched microdomains 1	PAG1	LTEEEISAMYSSVNKPGQLVNKSGQSLTVPE	4998	P	4	8610		0.999987	0.000626157	58.877	52.133	58.877	0.19943	18401000	NaN	NaN	0.999987	NaN	NaN	58.877
Q9NWY4	136	Q9NWY4	Q9NWY4	UPF0609 protein C4orf27	C4orf27	GDNKTQYHMGYFRDSPDEFPVYVGINEAKKN	5000	P	4	8631		0.999625	0.000539108	65.423	62.983	65.423	-1.0537	38813000	0.99808	NaN	0.999625	55.049	NaN	65.423
Q9NX14	135	Q9NX14	Q9NX14	NADH dehydrogenase [ubiquinone] 1 beta subcomplex subunit 11, mitochondrial	NDUFB11	REAERLVKYREANGLPIMESNCFDPSKIQLP	5003	P	3	8642		0.999961	0.0246192	64.265	58.935	64.265	-0.44275	23427000	0.999961	NaN	NaN	64.265	NaN	NaN
Q9NX24	131	Q9NX24	Q9NX24	H/ACA ribonucleoprotein complex subunit 2	NHP2	AAAGSKRPTCVIMVKPHEEYQEAYDECLEEV	5006	P	4	8645		0.537376	1.53226e-06	68.43	64.237	68.43	-0.46936	65583000	NaN	0	0.537376	NaN	NaN	68.43
Q9NXH9	561	Q9NXH9	Q9NXH9	tRNA (guanine(26)-N(2))-dimethyltransferase	TRMT1	RGLKRFQANPEANWGPRPRARPGGKAADEAM	5011	P	3	8675		0.999999	0.0024841	111.79	100.85	111.79	0.20607	178600000	0.999999	NaN	0.984828	111.79	NaN	63.181
Q9NXH9	563	Q9NXH9	Q9NXH9	tRNA (guanine(26)-N(2))-dimethyltransferase	TRMT1	LKRFQANPEANWGPRPRARPGGKAADEAMEE	5012	P	3	8675		0.999996	0.0024841	111.79	100.85	111.79	0.20607	178600000	0.999996	NaN	0.986963	111.79	NaN	63.181
Q9NXW9	207	Q9NXW9	Q9NXW9	Alpha-ketoglutarate-dependent dioxygenase alkB homolog 4	ALKBH4	SMCREAPGSLLLCSAPSAAPEALVDSVIAPS	5014	P	3	8690		0.787718	0.000331167	62.7	59.333	62.7	-0.31777	2115600	0.787718	NaN	NaN	62.7	NaN	NaN
Q9NY27	413	Q9NY27	Q9NY27	Serine/threonine-protein phosphatase 4 regulatory subunit 2	PPP4R2	SSMENDDEATEVTDEPMEQD___________	5015	P	3	8694		1	0.00380032	48.115	48.114	48.115	0.20657	11472000	NaN	NaN	1	NaN	NaN	48.115
Q9NY93	64	Q9NY93	Q9NY93	Probable ATP-dependent RNA helicase DDX56	DDX56	ARARTGSGKTAAYAIPMLQLLLHRKATGPVV	5016	P	3	8701		1	0.000165451	107.14	101.11	68.972	-0.24767	921260000	1	NaN	1	107.14	NaN	68.972
Q9NYU2	632	Q9NYU2	Q9NYU2	UDP-glucose:glycoprotein glucosyltransferase 1	UGGT1	KEARGYYEQTGVGPLPVVLFNGMPFEREQLD	5021	P	4	8728		0.561226	0.000239241	46.174	31.602	46.174	2.1216	52439000	NaN	NaN	0.561226	NaN	NaN	46.174
Q9NYZ3	359	Q9NYZ3	Q9NYZ3	G2 and S phase-expressed protein 1	GTSE1	SSRPLSNISKSGRMGPAMLRPALPAGPVGAS	5023	P	3	8734		0.918675	5.97729e-05	84.03	84.03	84.03	-0.29214	51671000	0.486541	NaN	0.918675	48.872	NaN	84.03
Q9NZ43	133	Q9NZ43	Q9NZ43	Vesicle transport protein USE1	USE1	TSEMRSELLGTDSAEPEMDVRKRTGVAGSQP	5025	P	2	8740		1	0.00815775	107.09	96.857	107.09	0.20657	7340700	1	NaN	NaN	107.09	NaN	NaN
Q9NZH0	378	Q9NZH0	Q9NZH0	G-protein coupled receptor family C group 5 member B	GPRC5B	LGKRPSAPFRSNVYQPTEMAVVLNGGTIPTA	5026	P	3	8756		0.997202	0.00442472	48.305	42.21	48.305	0.22897	21182000	0.997202	NaN	NaN	48.305	NaN	NaN
Q9NZI7	152	Q9NZI7	Q9NZI7	Upstream-binding protein 1	UBP1	WKWNRPGDRLLDLDIPMSVGIIDTRTNPSQL	5027	P	3	8758		1	0.00148908	75.574	57.856	75.574	1.7947	98325000	NaN	NaN	1	NaN	NaN	75.574
Q9NZL4	103	Q9NZL4	Q9NZL4	Hsp70-binding protein 1	HSPBP1	EEVEQMKSCLRVLSQPMPPTAGEAEQAADQQ	5029	P	2	8767		0.999677	1.95093e-08	126.48	102.65	126.48	-0.33565	14094000	NaN	NaN	0.999677	NaN	NaN	126.48
Q9NZN5	662	Q9NZN5	Q9NZN5	Rho guanine nucleotide exchange factor 12	ARHGEF12	RQSGLANEGTDAGYLPANSMSSVASGASFSQ	5031	P	5	8774		1	5.97659e-05	45.084	41.645	45.084	0.03718	9651000	1	NaN	NaN	45.084	NaN	NaN
Q9P0L0	103	Q9P0L0	Q9P0L0	Vesicle-associated membrane protein-associated protein A	VAPA	NEKSKHKFMVQTIFAPPNTSDMEAVWKEAKP	5038	P	4	8806		0.54245	0.00373272	47.537	42.631	47.537	-1.4949	24017000	0.54245	NaN	NaN	47.537	NaN	NaN
Q9P0S9	111	Q9P0S9	Q9P0S9	Transmembrane protein 14C	TMEM14C	SLLMVAKVGVSMFNRPH______________	5043	P	4	8817		0.971066	0.00156705	62.237	62.237	62.237	-0.21952	6216900	0.971066	NaN	NaN	62.237	NaN	NaN
Q9P0T4	11	Q9P0T4	Q9P0T4	Zinc finger protein 581	ZNF581	_____MLVLPSPCPQPLAFSSVETMEGPPRR	5044	P	3	8818		0.615541	0.00127371	59.678	59.678	54.728	2.2416	14748000	NaN	NaN	0.615541	NaN	NaN	59.678
Q9P258	281	Q9P258	Q9P258	Protein RCC2	RCC2	SMIMDCKGNLYSFGCPEYGQLGHNSDGKFIA	5048	P	3	8849		1	5.28405e-06	93.851	90.636	44.729	0.97338	453440000	1	NaN	1	93.851	NaN	53.201
Q9P287	194	Q9P287	Q9P287	BRCA2 and CDKN1A-interacting protein	BCCIP	LLSERFINVPPQIALPMYQQLQKELAGAHRT	5053	P	4	8857		1	1.9218e-40	194.37	187.32	194.37	0.071578	1247000000	1	NaN	1	138.75	NaN	194.37
Q9P289	393	Q9P289	Q9P289	Serine/threonine-protein kinase 26	STK26	IEELEKSIAVAEAACPGITDKMVKKLIEKFQ	5059	P	2	8858		1	0.00697125	136.53	105.24	100.69	-1.2213	46973000	1	NaN	NaN	136.53	NaN	NaN
Q9P2D0	1346	Q9P2D0	Q9P2D0	Inhibitor of Bruton tyrosine kinase	IBTK	EFVIVERTPQGPLAVPMWNKHGC________	5060	P	2	8862		1	0.023394	123.96	113.17	123.96	-0.66663	22293000	1	NaN	NaN	123.96	NaN	NaN
Q9P2E9	125	Q9P2E9	Q9P2E9	Ribosome-binding protein 1	RRBP1	TPVQPPIIVAPVATVPAMPQEKLASSPKDKK	5064	P	2	8870		0.906233	0.0201615	90.714	86.934	90.714	-0.59663	10616000	NaN	NaN	0.906233	NaN	NaN	90.714
Q9P2F8	47	Q9P2F8	Q9P2F8	Signal-induced proliferation-associated 1-like protein 2	SIPA1L2	DYFARKFKAINGNMGPTTSLNASNSNETGGG	5065	P	3	8872		0.998709	0.000760191	48.697	46.718	48.697	2.0417	20731000	0.998709	NaN	NaN	48.697	NaN	NaN
Q9P2I0	510	Q9P2I0	Q9P2I0	Cleavage and polyadenylation specificity factor subunit 2	CPSF2	EEKSKLESGLTNGDEPMDQDLSDVPTKCIST	5066	P	3	8877		0.999999	8.5536e-05	102.16	99.152	102.16	-0.65619	23731000	NaN	NaN	0.999999	NaN	NaN	102.16
Q9P2J5	247	Q9P2J5	Q9P2J5	Leucine--tRNA ligase, cytoplasmic	LARS	KFGKRYTIYSPKDGQPCMDHDRQTGEGVGPQ	5067	P	3	8879		0.999999	0.00010953	89.721	88.146	89.721	-0.011951	1147300000	0.999724	NaN	0.999999	67.194	NaN	89.721
Q9P2J5	701	Q9P2J5	Q9P2J5	Leucine--tRNA ligase, cytoplasmic	LARS	LYNHVAMWPEQSDKWPTAVRANGHLLLNSEK	5074	P	5	8879		0.999385	0.0106014	47.191	42.659	47.191	-1.8416	51764000	0.999385	NaN	NaN	47.191	NaN	NaN
Q9P2N6	676	Q9P2N6	Q9P2N6	KAT8 regulatory NSL complex subunit 3	KANSL3	CAPSQGSAPEAAGGKPITMTLGQASAGAKEL	5079	P	4	8893		0.996111	1.59289e-11	95.454	91.216	51.604	1.7302	111580000	0.996111	NaN	0.873901	95.454	NaN	86.186
Q9P2P5	875	Q9P2P5	Q9P2P5	E3 ubiquitin-protein ligase HECW2	HECW2	NRRYQSIRRTMTNERPEENTNAIDGAGEEAD	5081	P	5	8896		1	1.74165e-05	78.836	73.979	59.598	-0.88572	28035000	1	NaN	1	78.836	NaN	59.598
Q9P2R3	360	Q9P2R3	Q9P2R3	Rabankyrin-5	ANKFY1	EMAQIAEALLQAGANPNMQDSKGRTPLHVSI	5082	P	5	8898		1	5.51137e-07	72.707	67.277	72.707	-0.82613	29756000	1	NaN	1	50.229	NaN	72.707
Q9P2R3	370	Q9P2R3	Q9P2R3	Rabankyrin-5	ANKFY1	QAGANPNMQDSKGRTPLHVSIMAGNEYVFSQ	5084	P	3	8898		1	0.003989	57.806	43.346	57.806	1.1452	57748000	1	NaN	NaN	57.806	NaN	NaN
Q9P2T1	225	Q9P2T1	Q9P2T1	GMP reductase 2	GMPR2	HGLKGHIISDGGCSCPGDVAKAFGAGADFVM	5087	P	3	8902		1	0.00310244	68.413	63.508	68.413	1.1751	0	1	NaN	NaN	68.413	NaN	NaN
Q9UBF2	573	Q9UBF2	Q9UBF2	Coatomer subunit gamma-2	COPG2	MEKALHQYTLEPSEKPFDMKSIPLAMAPVFE	5096	P	4	8920		0.987171	0.010598	55.33	47.143	55.33	-1.2557	695780000	NaN	NaN	0.987171	NaN	NaN	55.33
Q9UBN7	408	Q9UBN7	Q9UBN7	Histone deacetylase 6	HDAC6	EGVSASLHTLLGDPCPMLESPGAPCRSAQAS	5098	P	3	8937		0.890397	0.00011026	62.696	56.192	62.696	-1.3137	26681000	NaN	NaN	0.890397	NaN	NaN	62.696
Q9UBQ7	321	Q9UBQ7	Q9UBQ7	Glyoxylate reductase/hydroxypyruvate reductase	GRHPR	SLLAANNLLAGLRGEPMPSELKL________	5100	P	3	8944		0.951225	0.000475342	77.053	77.053	77.053	-1.6229	12697000	0.951225	NaN	NaN	77.053	NaN	NaN
Q9UBT2	208	Q9UBT2	Q9UBT2	SUMO-activating enzyme subunit 2	UBA2	FNQLFGEEDADQEVSPDRADPEAAWEPTEAE	5109	P	4	8951		0.916413	0.027988	43.921	39.299	43.921	1.8412	29300000	NaN	NaN	0.916413	NaN	NaN	43.921
Q9UBT2	213	Q9UBT2	Q9UBT2	SUMO-activating enzyme subunit 2	UBA2	GEEDADQEVSPDRADPEAAWEPTEAEARARA	5110	P	3	8951		0.962225	1.18973e-06	69.094	67.565	64.914	-0.99239	44868000	0.962225	NaN	0.916413	69.094	NaN	43.921
Q9UBT2	219	Q9UBT2	Q9UBT2	SUMO-activating enzyme subunit 2	UBA2	QEVSPDRADPEAAWEPTEAEARARASNEDGD	5111	P	3	8951		0.854378	1.18973e-06	69.094	67.565	64.914	-0.99239	22237000	0.854378	NaN	NaN	69.094	NaN	NaN
Q9UBU8	292	Q9UBU8	Q9UBU8	Mortality factor 4-like protein 1	MORF4L1	ERPQYAEILADHPDAPMSQVYGAPHLLRLFV	5112	P	4	8956		0.902006	0.000341321	96.982	91.262	96.982	0.59787	53812000	NaN	NaN	0.902006	NaN	NaN	96.982
Q9UBU9	206	Q9UBU9	Q9UBU9	Nuclear RNA export factor 1	NXF1	INSSAPPHTILNELKPEQVEQLKLIMSKRYD	5113	P	5	8957		0.970052	0.00274961	41.89	40.469	41.89	-0.2159	269300000	NaN	NaN	0.970052	NaN	NaN	41.89
Q9UBV2	255	Q9UBV2	Q9UBV2	Protein sel-1 homolog 1	SEL1L	QAAREMFEKLTEEGSPKGQTALGFLYASGLG	5116	P	4	8958		0.999682	0.000234756	53.968	46.289	53.968	0.49024	136530000	NaN	NaN	0.999682	NaN	NaN	53.968
Q9UBW7	806	Q9UBW7	Q9UBW7	Zinc finger MYM-type protein 2	ZMYM2	CDQHCLLRFYCQQNEPNMTTQKGPENLHYDQ	5117	P	4	8961		0.999698	2.68108e-05	70.647	65.16	70.647	0.50555	23703000	NaN	NaN	0.999698	NaN	NaN	70.647
Q9UDR5	239	Q9UDR5	Q9UDR5	Alpha-aminoadipic semialdehyde synthase, mitochondrial;Lysine ketoglutarate reductase;Saccharopine dehydrogenase	AASS	TGNVSKGAQAIFNELPCEYVEPHELKEVSQT	5120	P	3	8968		0.99968	0.00806435	56.149	51.88	56.149	-0.063264	10284000	0.99968	NaN	NaN	56.149	NaN	NaN
Q9UER7	669	Q9UER7	Q9UER7	Death domain-associated protein 6	DAXX	SVHEKNGKKICTLPSPPSPLASLAPVADSST	5122	P	4	8981		0.981212	1.19937e-12	62.802	52.163	62.802	0.10532	20665000	0.981212	NaN	NaN	62.802	NaN	NaN
Q9UER7	670	Q9UER7	Q9UER7	Death domain-associated protein 6	DAXX	VHEKNGKKICTLPSPPSPLASLAPVADSSTR	5123	P	4	8981		0.981212	1.19937e-12	62.802	52.163	62.802	0.10532	20665000	0.981212	NaN	NaN	62.802	NaN	NaN
Q9UER7	672	Q9UER7	Q9UER7	Death domain-associated protein 6	DAXX	EKNGKKICTLPSPPSPLASLAPVADSSTRVD	5124	P	4	8981		0.981212	1.19937e-12	62.802	52.163	62.802	0.10532	20665000	0.981212	NaN	NaN	62.802	NaN	NaN
Q9UER7	678	Q9UER7	Q9UER7	Death domain-associated protein 6	DAXX	ICTLPSPPSPLASLAPVADSSTRVDSPSHGL	5125	P	4	8981		0.982022	1.19937e-12	62.802	52.163	62.802	0.10532	20665000	0.982022	NaN	NaN	62.802	NaN	NaN
Q9UER7	689	Q9UER7	Q9UER7	Death domain-associated protein 6	DAXX	ASLAPVADSSTRVDSPSHGLVTSSLCIPSPA	5126	P	4	8981		0.94295	1.19937e-12	62.802	52.163	62.802	0.10532	20665000	0.94295	NaN	NaN	62.802	NaN	NaN
Q9UER7	82	Q9UER7	Q9UER7	Death domain-associated protein 6	DAXX	FEEFLELCKMQTADHPEVVPFLYNRQQRAHS	5127	P	3	8981		0.999682	0.0285628	50.608	46.082	50.608	-0.21256	28845000	NaN	NaN	0.999682	NaN	NaN	50.608
Q9UGI8	405	Q9UGI8	Q9UGI8	Testin	TES	LCSCCSKCLIGQKFMPVEGMVFCSVECKKRM	5136	P	3	8999		1	0.0188703	52.026	48.247	52.026	-2.6002	43227000	1	NaN	NaN	52.026	NaN	NaN
Q9UGI8	115	Q9UGI8	Q9UGI8	Testin	TES	AKKNVSINTVTYEWAPPVQNQALARQYMQML	5137	P	3	8999		1	9.50174e-49	185.87	177.53	45.135	-0.15786	11510000	1	NaN	NaN	185.87	NaN	NaN
Q9UGU0	911	Q9UGU0	Q9UGU0	Transcription factor 20	TCF20	RNDRLNPTLSQSVILPGGLVSMETKLKSQSG	5142	P	4	9010		0.999995	0.00298944	54.744	47.586	54.744	-1.1604	74384000	NaN	NaN	0.999995	NaN	NaN	54.744
Q9UGV2	294	Q9UGV2	Q9UGV2	Protein NDRG3	NDRG3	PINTTLLKMADCGGLPQVVQPGKLTEAFKYF	5144	P	2	9012		0.999279	0.004622	74.162	32.763	74.162	-0.97398	108200000	0.999279	NaN	NaN	74.162	NaN	NaN
Q9UH36	17	Q9UH36	Q9UH36	SRR1-like protein	SRRD	AAAAAAALESWQAAAPRKRRSAARRPRRREA	5145	P	2	9016		1	3.86354e-06	110.66	70.072	110.66	-3.7102	0	1	NaN	1	110.66	NaN	57.492
Q9UHD8	193	Q9UHD8	Q9UHD8	Septin-9	2009-09-01	APATDAAPKRVEIQMPKPAEAPTAPSPAQTL	5152	P	4	9031		0.857583	1.22889e-06	94.263	90.558	94.263	-0.26976	227390000	NaN	NaN	0.857583	NaN	NaN	94.263
Q9UHD8	246	Q9UHD8	Q9UHD8	Septin-9	2009-09-01	VAEATPRSQEATEAAPSCVGDMADTPRDAGL	5154	P	2	9031		0.996435	0.00107862	83.692	78.613	83.692	-2.1796	18093000	0.996435	NaN	NaN	83.692	NaN	NaN
Q9UHD9	291	Q9UHD9	Q9UHD9	Ubiquilin-2	UBQLN2	QEPMLNAAQEQFGGNPFASVGSSSSSGEGTQ	5157	P	4	9032		0.912308	1.87563e-07	74.631	74.631	56.313	0.90377	59256000	0.912308	NaN	NaN	74.631	NaN	NaN
Q9UHR4	296	Q9UHR4	Q9UHR4	Brain-specific angiogenesis inhibitor 1-associated protein 2-like protein 1	BAIAP2L1	SPKMPPAPSGRAYTSPLIDMFNNPATAAPNS	5160	P	3	9054		0.861776	0.0145249	49.089	44.436	49.089	1.5274	10571000	0.861776	NaN	NaN	49.089	NaN	NaN
Q9UHR4	372	Q9UHR4	Q9UHR4	Brain-specific angiogenesis inhibitor 1-associated protein 2-like protein 1	BAIAP2L1	TLLSFAQGDVITLLIPEEKDGWLYGEHDVSK	5161	P	4	9054		1	0.00020647	55.406	34.151	55.406	-2.4785	88583000	NaN	NaN	1	NaN	NaN	55.406
Q9UHR6	389	Q9UHR6	Q9UHR6	Zinc finger HIT domain-containing protein 2	ZNHIT2	EVAALTGELERLWGGPVPPAPRTLIEELPS_	5162	P	5	9056		0.832172	0.000179484	50.492	38.289	50.492	-2.857	8217200	0.832172	NaN	NaN	50.492	NaN	NaN
Q9UI10	131	Q9UI10	Q9UI10	Translation initiation factor eIF-2B subunit delta	EIF2B4	QARKGEQGGPPPKASPSTAGETPSGVKRLPE	5170	P	2	9067		1	0.0147317	67.726	43.344	67.726	0.56695	0	NaN	NaN	1	NaN	NaN	67.726
Q9UI10	138	Q9UI10	Q9UI10	Translation initiation factor eIF-2B subunit delta	EIF2B4	GGPPPKASPSTAGETPSGVKRLPEYPQVDDL	5171	P	2	9067		1	0.0147317	67.726	43.344	67.726	0.56695	0	NaN	NaN	1	NaN	NaN	67.726
Q9UI36	183	Q9UI36	Q9UI36	Dachshund homolog 1	DACH1	PGKPVYSTPSPVENTPQNNECKMVDLRGAKV	5175	P	3	9074		0.997155	0.00780916	58.83	54.479	58.83	2.403	15012000	0.997155	NaN	NaN	58.83	NaN	NaN
Q9UI95	51	Q9UI95	Q9UI95	Mitotic spindle assembly checkpoint protein MAD2B	MAD2L2	VYPVGIFQKRKKYNVPVQMSCHPELNQYIQD	5176	P	4	9076		0.980409	0.00113098	57.278	52.794	57.278	-0.96444	11165000	NaN	NaN	0.980409	NaN	NaN	57.278
Q9UIF9	1363	Q9UIF9	Q9UIF9	Bromodomain adjacent to zinc finger domain protein 2A	BAZ2A	TPSPQQLASSKPMNRPSAANPCSPVQFSSTP	5179	P	3	9083		0.525611	0.00373627	65.275	58.243	65.275	1.3411	8853000	0.525611	NaN	NaN	65.275	NaN	NaN
Q9UIG0	954	Q9UIG0	Q9UIG0	Tyrosine-protein kinase BAZ1B	BAZ1B	HHCKDHTVSGDEDYCPRSKKANLGKNASMNT	5180	P	3	9084		1	0.001368	95.094	94.463	95.094	-1.042	133540000	1	NaN	NaN	95.094	NaN	NaN
Q9UIS9	291	Q9UIS9	Q9UIS9	Methyl-CpG-binding domain protein 1	MBD1	SKMAARRRPGAQPLPPPPPSQSPEPTEPHPR	5182	P	4	9093		0.589136	0.028708	40.937	37.838	40.937	-2.5037	6484600	0.589136	NaN	NaN	40.937	NaN	NaN
Q9UIS9	292	Q9UIS9	Q9UIS9	Methyl-CpG-binding domain protein 1	MBD1	KMAARRRPGAQPLPPPPPSQSPEPTEPHPRA	5183	P	4	9093		0.801892	0.028708	40.937	37.838	40.937	-2.5037	9792700	0.801892	NaN	NaN	40.937	NaN	NaN
Q9UIS9	293	Q9UIS9	Q9UIS9	Methyl-CpG-binding domain protein 1	MBD1	MAARRRPGAQPLPPPPPSQSPEPTEPHPRAL	5184	P	4	9093		0.803088	0.028708	40.937	37.838	40.937	-2.5037	9792700	0.803088	NaN	NaN	40.937	NaN	NaN
Q9UJ41	284	Q9UJ41	Q9UJ41	Rab5 GDP/GTP exchange factor	RABGEF1	VKAITDIIEMDSKRVPRDKLACITKCSKHIF	5187	P	2	9098		1	0.00693505	123.63	92.194	123.63	-3.2538	72594000	1	NaN	NaN	123.63	NaN	NaN
Q9UJ41	250	Q9UJ41	Q9UJ41	Rab5 GDP/GTP exchange factor	RABGEF1	DLAIQKRIRALRWVTPQMLCVPVNEDIPEVS	5188	P	3	9098		0.98363	0.00994144	49.871	49.871	49.871	-2.4035	48327000	0.98363	NaN	NaN	49.871	NaN	NaN
Q9UJA5	177	Q9UJA5	Q9UJA5	tRNA (adenine(58)-N(1))-methyltransferase non-catalytic subunit TRM6	TRMT6	KPSTRILSIMYYAREPGKINHMRYDTLAQML	5191	P	4	9104		1	0.027537	43.497	30.621	43.497	0.68875	33005000	NaN	NaN	1	NaN	NaN	43.497
Q9UJF2	489	Q9UJF2	Q9UJF2	Ras GTPase-activating protein nGAP	RASAL2	SASLFLRFLCPAIMSPSLFNLMQEYPDDRTS	5192	P	3	9107		0.506862	0.00543771	51.645	51.645	51.645	0.45704	19952000	0.506862	NaN	NaN	51.645	NaN	NaN
Q9UJP4	4	Q9UJP4	Q9UJP4	Kelch-like protein 21	KLHL21	____________MERPAPLAVLPFSDPAHAL	5194	P	3	9113		0.863747	3.53402e-07	95.123	81.648	95.123	-1.3909	159550000	NaN	NaN	0.863747	NaN	NaN	95.123
Q9UJS0	266	Q9UJS0	Q9UJS0	Calcium-binding mitochondrial carrier protein Aralar2	SLC25A13	KEEFVLAAQKFGQVTPMEVDILFQLADLYEP	5195	P	2	9114		1	1.41655e-18	166.48	149.9	166.48	-0.56075	239710000	1	NaN	NaN	166.48	NaN	NaN
Q9UK41	155	Q9UK41	Q9UK41	Vacuolar protein sorting-associated protein 28 homolog	VPS28	MDKLRLEIRAMDEIQPDLRELMETMHRMSHL	5210	P	3	9137		1	0.00107712	68.173	59.172	68.173	-0.69325	20826000	NaN	NaN	1	NaN	NaN	68.173
Q9UK59	472	Q9UK59	Q9UK59	Lariat debranching enzyme	DBR1	QASEFSASFSDVRILPGSMIVSSDDTVDSTI	5211	P	4	9141		0.999967	1.33408e-07	62.605	48.863	62.605	1.5928	46920000	0.999967	NaN	NaN	62.605	NaN	NaN
Q9UK99	226	Q9UK99	Q9UK99	F-box only protein 3	FBXO3	EAAEGRNKNEVFYQCPDQMARNPAAIDMFII	5214	P	2	9147		1	0.0171643	76.943	67.511	76.943	-0.8348	4136900	1	NaN	NaN	76.943	NaN	NaN
Q9UKB3	86	Q9UKB3	Q9UKB3	DnaJ homolog subfamily C member 12	DNAJC12	SRARYDHWRRSQMSMPFQQWEALNDSVKTSM	5217	P	2	9153		1	0.000856607	70.622	62.023	70.622	-4.1352	0	1	NaN	1	62.162	NaN	70.622
Q9UKD2	159	Q9UKD2	Q9UKD2	mRNA turnover protein 4 homolog	MRTO4	QFPHSMEPQLRQLGLPTALKRGVVTLLSDYE	5220	P	5	9156		0.530876	2.28167e-07	73.492	68.96	73.492	0.40992	185280000	NaN	NaN	0.530876	NaN	NaN	73.492
Q9UKE5	636	Q9UKE5	Q9UKE5	TRAF2 and NCK-interacting protein kinase	TNIK	GFQEALNVTSHRVEMPRQNSDPTSENPPLPT	5221	P	3	9157		1	0.00212893	83.776	70.349	83.776	0.92196	26408000	1	NaN	NaN	83.776	NaN	NaN
Q9UKF6	371	Q9UKF6	Q9UKF6	Cleavage and polyadenylation specificity factor subunit 3	CPSF3	GYCVEGTLAKHIMSEPEEITTMSGQKLPLKM	5222	P	2	9158		1	0.0229008	63.073	53.885	63.073	-0.35577	6368900	NaN	NaN	1	NaN	NaN	63.073
Q9UKV3	316	Q9UKV3	Q9UKV3	Apoptotic chromatin condensation inducer in the nucleus	ACIN1	LKEFKEEGEEIPRVKPEEMMDERPKTRSQEQ	5228	P	4	9184		0.999903	0.0342555	59.57	59.57	59.57	-0.64549	22931000	0.999903	NaN	NaN	59.57	NaN	NaN
Q9UKX7	412	Q9UKX7	Q9UKX7	Nuclear pore complex protein Nup50	NUP50	ADTNLGNILLNVLIPPNMPCTRTGKNNVLIV	5230	P	3	9187		0.710091	8.86182e-09	111.4	104.46	111.4	1.4177	19814000	0.710091	NaN	NaN	111.4	NaN	NaN
Q9UKY4	431	Q9UKY4	Q9UKY4	Protein O-mannosyl-transferase 2	POMT2	HKETSRNLHSHYHEAPMTRKHYQVTGYGING	5236	P	3	9189		1	0.00657542	73.834	62.888	73.834	0.47997	14168000	NaN	NaN	1	NaN	NaN	73.834
Q9UL54	337	Q9UL54	Q9UL54	Serine/threonine-protein kinase TAO2	TAOK2	NGPGAEAPEEEEEAEPYMHRAGTLTSLESSH	5242	P	3	9206		0.994608	0.000152067	78.098	72.438	78.098	-1.8244	13522000	NaN	NaN	0.994608	NaN	NaN	78.098
Q9ULC4	34	Q9ULC4	Q9ULC4	Malignant T-cell-amplified sequence 1	MCTS1	TSVIKGIKNQLIEQFPGIEPWLNQIMPKKDP	5245	P	3	9211		0.993569	0.00123424	85.457	74.972	58.997	0.89561	76259000	0.990069	NaN	0.993569	85.457	NaN	58.997
Q9ULC4	38	Q9ULC4	Q9ULC4	Malignant T-cell-amplified sequence 1	MCTS1	KGIKNQLIEQFPGIEPWLNQIMPKKDPVKIV	5246	P	3	9211		0.999711	0.00123424	85.457	74.972	59.372	0.79115	76259000	0.999711	NaN	0.999031	85.457	NaN	58.997
Q9ULH7	112	Q9ULH7	Q9ULH7	MKL/myocardin-like protein 2	MKL2	SELVRMHILEETFAEPSLQATQMKLKRARLA	5250	P	2	9225		1	0.0003894	75.695	63.719	75.695	0.25964	3507400	NaN	NaN	1	NaN	NaN	75.695
Q9ULH7	833	Q9ULH7	Q9ULH7	MKL/myocardin-like protein 2	MKL2	NKASNSVLQSRNAPLPSLQNGPNTPNKPSSP	5251	P	4	9225		0.701501	0.000185132	42.661	37.907	42.661	-0.021674	77450000	0.701501	NaN	0	42.661	NaN	NaN
Q9ULH7	839	Q9ULH7	Q9ULH7	MKL/myocardin-like protein 2	MKL2	VLQSRNAPLPSLQNGPNTPNKPSSPPPPQQF	5252	P	4	9225		0.683412	0.000185132	42.661	37.907	42.661	-0.021674	77450000	0.683412	NaN	0	42.661	NaN	NaN
Q9ULH7	842	Q9ULH7	Q9ULH7	MKL/myocardin-like protein 2	MKL2	SRNAPLPSLQNGPNTPNKPSSPPPPQQFVVQ	5253	P	4	9225		0.745599	0.000185132	42.661	37.907	40.719	-1.587	138690000	0.683412	NaN	0.745599	42.661	NaN	40.719
Q9ULH7	845	Q9ULH7	Q9ULH7	MKL/myocardin-like protein 2	MKL2	APLPSLQNGPNTPNKPSSPPPPQQFVVQHSL	5254	P	4	9225		0.742002	0.000185132	42.661	37.907	40.719	-1.587	138690000	0.683412	NaN	0.742002	42.661	NaN	40.719
Q9ULH7	848	Q9ULH7	Q9ULH7	MKL/myocardin-like protein 2	MKL2	PSLQNGPNTPNKPSSPPPPQQFVVQHSLFGS	5255	P	4	9225		0.741834	0.000185132	42.661	37.907	40.719	-1.587	138690000	0.674935	NaN	0.741834	42.661	NaN	40.719
Q9ULH7	849	Q9ULH7	Q9ULH7	MKL/myocardin-like protein 2	MKL2	SLQNGPNTPNKPSSPPPPQQFVVQHSLFGSP	5256	P	4	9225		0.741834	0.000185132	42.661	37.907	40.719	-1.587	138690000	0.674935	NaN	0.741834	42.661	NaN	40.719
Q9ULH7	850	Q9ULH7	Q9ULH7	MKL/myocardin-like protein 2	MKL2	LQNGPNTPNKPSSPPPPQQFVVQHSLFGSPV	5257	P	4	9225		0.741592	0.000236057	40.719	36.606	40.719	-1.587	61236000	NaN	NaN	0.741592	NaN	NaN	40.719
Q9ULH7	851	Q9ULH7	Q9ULH7	MKL/myocardin-like protein 2	MKL2	QNGPNTPNKPSSPPPPQQFVVQHSLFGSPVA	5258	P	4	9225		0.741592	0.000236057	40.719	36.606	40.719	-1.587	61236000	NaN	NaN	0.741592	NaN	NaN	40.719
Q9ULT8	2061	Q9ULT8	Q9ULT8	E3 ubiquitin-protein ligase HECTD1	HECTD1	LQQIEEPLALASGALPDWCEQLTSKCPFLIP	5264	P	3	9249		0.998757	0.00068213	84.933	74.322	84.933	-2.5135	12419000	0.998757	NaN	NaN	84.933	NaN	NaN
Q9ULU4	371	Q9ULU4	Q9ULU4	Protein kinase C-binding protein 1	ZMYND8	KFGVFNYSPFRTPYTPNSQYQMLLDPTNPSA	5265	P	3	9250		0.903954	0.00517905	51.234	44.281	51.234	-0.24943	15660000	0.903954	NaN	NaN	51.234	NaN	NaN
Q9ULV4	256	Q9ULV4	Q9ULV4	Coronin-1C	CORO1C	SERQLALWNPKNMQEPIALHEMDTSNGVLLP	5268	P	4	9253		0.999595	0.00291976	82.555	82.555	82.555	1.0323	37684000	NaN	NaN	0.999595	NaN	NaN	82.555
Q9ULW3	259	Q9ULW3	Q9ULW3	Activator of basal transcription 1	ABT1	RSNKGLLARIFGAPPPSESMEGPSLVRDS__	5270	P	3	9255		0.862513	0.00043999	95.094	86.594	95.094	0.34864	97234000	0.862513	NaN	NaN	95.094	NaN	NaN
Q9UMS4	360	Q9UMS4	Q9UMS4	Pre-mRNA-processing factor 19	PRPF19	TDETSGCSLTCAQFHPDGLIFGTGTMDSQIK	5273	P	3	9273		1	0.00363299	40.764	30.603	40.764	-0.56695	24368000	1	NaN	NaN	40.764	NaN	NaN
Q9UMS4	231	Q9UMS4	Q9UMS4	Pre-mRNA-processing factor 19	PRPF19	LHSASIPGILALDLCPSDTNKILTGGADKNV	5274	P	5	9273		0.998718	0.00127923	48.422	44.22	48.422	-2.0146	55429000	0.998718	NaN	NaN	48.422	NaN	NaN
Q9UMX0	282	Q9UMX0	Q9UMX0	Ubiquilin-1	UBQLN1	GGYNALRRMYTDIQEPMLSAAQEQFGGNPFA	5275	P	3	9274		0.819021	8.32778e-08	89.742	85.426	89.742	0.03373	31238000	NaN	NaN	0.819021	NaN	NaN	89.742
Q9UMX0	232	Q9UMX0	Q9UMX0	Ubiquilin-1	UBQLN1	QLIQRNPEISHMLNNPDIMRQTLELARNPAM	5277	P	3	9274		0.998023	0.0264456	47.499	33.627	47.499	0.042631	22565000	NaN	NaN	0.998023	NaN	NaN	47.499
Q9UN86	339	Q9UN86	Q9UN86	Ras GTPase-activating protein-binding protein 2	G3BP2	IIRYPDSHQLFVGNLPHDIDENELKEFFMSF	5281	P	6	9286		0.88741	0.00156383	43.478	39.807	43.478	-1.5366	64624000	0.88741	NaN	NaN	43.478	NaN	NaN
Q9UNE7	243	Q9UNE7	Q9UNE7	E3 ubiquitin-protein ligase CHIP	STUB1	PDYLCGKISFELMREPCITPSGITYDRKDIE	5282	P	4	9288		0.995089	0.000541342	73.315	66.326	64.203	-0.35266	425750000	0.995089	NaN	0.992918	73.315	NaN	57.989
Q9UNE7	282	Q9UNE7	Q9UNE7	E3 ubiquitin-protein ligase CHIP	STUB1	FDPVTRSPLTQEQLIPNLAMKEVIDAFISEN	5283	P	4	9288		0.999999	5.858e-05	82.037	67.454	82.037	-0.057845	71996000	0.999983	NaN	0.999999	63.454	NaN	82.037
Q9UNN5	321	Q9UNN5	Q9UNN5	FAS-associated factor 1	FAF1	DGEVFGMASSALRKSPMMPENAENEGDALLQ	5284	P	3	9300		0.878234	5.43145e-06	109.39	109.39	109.39	-0.4235	16054000	NaN	NaN	0.878234	NaN	NaN	109.39
Q9UNP9	231	Q9UNP9	Q9UNP9	Peptidyl-prolyl cis-trans isomerase E	PPIE	GKKFDDENFILKHTGPGLLSMANSGPNTNGS	5285	P	3	9302		0.97982	0.00227434	53.844	51.437	53.844	-0.023142	18473000	NaN	NaN	0.97982	NaN	NaN	53.844
Q9UNS2	370	Q9UNS2	Q9UNS2	COP9 signalosome complex subunit 3	COPS3	DGMVSFHDNPEKYNNPAMLHNIDQEMLKCIE	5287	P	4	9306		0.965568	0.000602446	56.021	50.813	43.068	0.29698	57716000	0.819693	NaN	0.965568	56.021	NaN	43.068
Q9UNS2	331	Q9UNS2	Q9UNS2	COP9 signalosome complex subunit 3	COPS3	TLSLQDMASRVQLSGPQEAEKYVLHMIEDGE	5288	P	4	9306		1	9.91054e-05	84.515	63.492	84.515	0.92134	153040000	1	NaN	NaN	84.515	NaN	NaN
Q9UNX4	794	Q9UNX4	Q9UNX4	WD repeat-containing protein 3	WDR3	AICKAAGKEVPLPSNPILMAYGSISPSAYVL	5289	P	3	9310		0.829887	0.00233193	55.101	50.743	55.101	0.93771	260890000	0.829887	NaN	NaN	55.101	NaN	NaN
Q9UPN7	334	Q9UPN7	Q9UPN7	Serine/threonine-protein phosphatase 6 regulatory subunit 1	PPP6R1	ALRPRLSCFHQLLLEPPKLEPLQMTWGMLAP	5291	P	4	9321		0.666398	2.20951e-05	65.69	65.69	65.69	-4.2192	33056000	0.666398	NaN	NaN	65.69	NaN	NaN
Q9UPN7	335	Q9UPN7	Q9UPN7	Serine/threonine-protein phosphatase 6 regulatory subunit 1	PPP6R1	LRPRLSCFHQLLLEPPKLEPLQMTWGMLAPP	5292	P	4	9321		0.666398	2.20951e-05	65.69	65.69	65.69	-4.2192	33056000	0.666398	NaN	NaN	65.69	NaN	NaN
Q9UPN7	339	Q9UPN7	Q9UPN7	Serine/threonine-protein phosphatase 6 regulatory subunit 1	PPP6R1	LSCFHQLLLEPPKLEPLQMTWGMLAPPLGNT	5293	P	4	9321		0.666398	2.20951e-05	65.69	65.69	65.69	-4.2192	33056000	0.666398	NaN	NaN	65.69	NaN	NaN
Q9UPN9	273	Q9UPN9	Q9UPN9	E3 ubiquitin-protein ligase TRIM33	TRIM33	KKEDVSESVGASGQRPVFCPVHKQEQLKLFC	5294	P	4	9322		0.772343	0.00900816	49.773	45.587	49.773	2.1196	15840000	0.772343	NaN	NaN	49.773	NaN	NaN
Q9UPQ9	1345	Q9UPQ9	Q9UPQ9	Trinucleotide repeat-containing gene 6B protein	TNRC6B	QPGMKHSPSHPVGPKPHLDNMVPNALNVGLP	5296	P	3	9326		0.992376	0.00708018	54.223	51.032	54.223	1.0156	8219300	0.992376	NaN	NaN	54.223	NaN	NaN
Q9UPW6	443	Q9UPW6	Q9UPW6	DNA-binding protein SATB2	SATB2	ERDRIYQDERERSMNPNVSMVSSASSSPSSS	5303	P	3	9342		0.999801	0.0270943	45.369	41.401	45.369	-0.20169	11237000	NaN	NaN	0.999801	NaN	NaN	45.369
Q9UQ13	395	Q9UQ13	Q9UQ13	Leucine-rich repeat protein SHOC-2	SHOC2	VLSKLNMKDNQLTSLPLDFGTWTSMVELNLA	5304	P	3	9349		1	4.08907e-05	54.05	49.428	54.05	-4.019	9060200	NaN	NaN	1	NaN	NaN	54.05
Q9UQ35	1125	Q9UQ35	Q9UQ35	Serine/arginine repetitive matrix protein 2	SRRM2	SRSPIRQDRGEFSASPMLKSGMSPEQSRFQS	5306	P	2	9351		1	0.0160882	122.52	100.39	122.52	-0.34572	23115000	1	NaN	0.999915	122.52	NaN	40.962
Q9UQ35	2120	Q9UQ35	Q9UQ35	Serine/arginine repetitive matrix protein 2	SRRM2	PPVALNSSRMSCFSRPSMSPTPLDRCRSPGM	5310	P	3	9351		0.983376	0.00191914	75.018	61.955	66.965	1.4612	291200000	0.983376	NaN	NaN	75.018	NaN	NaN
Q9UQ80	77	Q9UQ80	Q9UQ80	Proliferation-associated protein 2G4	PA2G4	KIFKKEKEMKKGIAFPTSISVNNCVCHFSPL	5315	P	3	9354		0.999868	0.0287796	46.702	38.414	46.702	-0.97915	86269000	0.999868	NaN	NaN	46.702	NaN	NaN
Q9UQ80	337	Q9UQ80	Q9UQ80	Proliferation-associated protein 2G4	PA2G4	TVLLMPNGPMRITSGPFEPDLYKSEMEVQDA	5316	P	5	9354		0.539956	8.81139e-05	53.615	37.004	53.615	1.0319	55193000	0.539956	NaN	NaN	53.615	NaN	NaN
Q9UQ80	181	Q9UQ80	Q9UQ80	Proliferation-associated protein 2G4	PA2G4	VTEAWNKVAHSFNCTPIEGMLSHQLKQHVID	5317	P	3	9354		1	0.00838099	52.731	45.285	52.731	-0.88609	58229000	1	NaN	NaN	52.731	NaN	NaN
Q9UQB8	297	Q9UQB8	Q9UQB8	Brain-specific angiogenesis inhibitor 1-associated protein 2	BAIAP2	ELAPFVGRMSAQESTPIMNGVTGPDGEDYSP	5318	P	3	9358		0.971057	8.08138e-05	73.341	73.341	73.341	0.48137	9469800	NaN	NaN	0.971057	NaN	NaN	73.341
Q9UQR0	562	Q9UQR0	Q9UQR0	Sex comb on midleg-like protein 2	SCML2	SSLNSGNYLNPACRNPMYIHTSVSQDFSRSV	5320	P	3	9365		1	0.00557413	68.919	58.261	68.919	-0.44247	48404000	NaN	0	1	NaN	NaN	68.919
Q9Y224	128	Q9Y224	Q9Y224	UPF0568 protein C14orf166	C14orf166	ATKNAEPLINLDVNNPDFKAGVMALANLLQI	5324	P	5	9373		0.995443	8.4527e-08	80.828	80.828	80.828	1.1501	335180000	0.995443	NaN	NaN	80.828	NaN	NaN
Q9Y230	322	Q9Y230	Q9Y230	RuvB-like 2	RUVBL2	ESFSFLNRALESDMAPVLIMATNRGITRIRG	5325	P	3	9375		1	0.0266741	51.147	43.777	50.608	-0.50244	45191000	NaN	NaN	1	NaN	NaN	51.147
Q9Y248	88	Q9Y248	Q9Y248	DNA replication complex GINS protein PSF2	GINS2	KMRDHERKEETFTPMPSPYYMELTKLLLNHA	5330	P	2	9385		0.648792	0.00752645	119.69	119.69	119.69	-0.21641	14305000	0.648792	NaN	NaN	119.69	NaN	NaN
Q9Y265	140	Q9Y265	Q9Y265	RuvB-like 1	RUVBL1	KETKEVYEGEVTELTPCETENPMGGYGKTIS	5333	P	3	9394		0.993098	0.00401688	50.255	49.469	50.255	-0.48913	11676000	0.993098	0	NaN	50.255	NaN	NaN
Q9Y285	289	Q9Y285	Q9Y285	Phenylalanine--tRNA ligase alpha subunit	FARSA	HDTFFLRDPAEALQLPMDYVQRVKRTHSQGG	5338	P	4	9402		0.999995	0.000109282	77.235	72.179	75.226	0.49494	355700000	0.999995	NaN	0.999991	77.235	NaN	66.556
Q9Y285	194	Q9Y285	Q9Y285	Phenylalanine--tRNA ligase alpha subunit	FARSA	SAFSTSISKQETELSPEMISSGSWRDRPFKP	5339	P	3	9402		1	0.0176875	56.303	45.3	56.303	-0.32642	44873000	1	NaN	NaN	56.303	NaN	NaN
Q9Y295	196	Q9Y295	Q9Y295	Developmentally-regulated GTP-binding protein 1	DRG1	FKKKDKGGINLTATCPQSELDAETVKSILAE	5342	P	3	9407		1	0.00239125	90.689	83.487	64.26	0.91264	69817000	1	NaN	NaN	90.689	NaN	NaN
Q9Y2D5	775	Q9Y2D5	Q9Y2D5	A-kinase anchor protein 2	AKAP2	RTCYKTAPGKIEKVKPPPSPTTEGPSLQPDL	5346	P	4	9420		0.995084	0.0005153	50.492	48.178	50.492	0.59985	90580000	0.995084	NaN	NaN	50.492	NaN	NaN
Q9Y2D5	776	Q9Y2D5	Q9Y2D5	A-kinase anchor protein 2	AKAP2	TCYKTAPGKIEKVKPPPSPTTEGPSLQPDLA	5347	P	4	9420		0.995084	0.0005153	50.492	48.178	50.492	0.59985	90580000	0.995084	NaN	NaN	50.492	NaN	NaN
Q9Y2D5	777	Q9Y2D5	Q9Y2D5	A-kinase anchor protein 2	AKAP2	CYKTAPGKIEKVKPPPSPTTEGPSLQPDLAP	5348	P	4	9420		0.995084	0.0005153	50.492	48.178	50.492	0.59985	90580000	0.995084	NaN	NaN	50.492	NaN	NaN
Q9Y2D5	779	Q9Y2D5	Q9Y2D5	A-kinase anchor protein 2	AKAP2	KTAPGKIEKVKPPPSPTTEGPSLQPDLAPEE	5349	P	4	9420		0.995084	0.0005153	50.492	48.178	50.492	0.59985	90580000	0.995084	NaN	NaN	50.492	NaN	NaN
Q9Y2D5	784	Q9Y2D5	Q9Y2D5	A-kinase anchor protein 2	AKAP2	KIEKVKPPPSPTTEGPSLQPDLAPEEAAGTQ	5350	P	4	9420		0.995084	0.0005153	50.492	48.178	50.492	0.59985	90580000	0.995084	NaN	NaN	50.492	NaN	NaN
Q9Y2H6	339	Q9Y2H6	Q9Y2H6	Fibronectin type-III domain-containing protein 3A	FNDC3A	VYVGEETNITLNDLKPAMDYHAKVQAEYNSI	5352	P	4	9438		1	0.00496332	49.902	43.936	49.902	1.0798	33044000	NaN	NaN	1	NaN	NaN	49.902
Q9Y2J2	1065	Q9Y2J2	Q9Y2J2	Band 4.1-like protein 3;Band 4.1-like protein 3, N-terminally processed	EPB41L3	DQALAQAIKEAKEQHPDMSVTKVVVHKETEI	5354	P	5	9443		1	0.0012872	45.527	39.115	45.527	-0.32006	73633000	NaN	NaN	1	NaN	NaN	45.527
Q9Y2L1	938	Q9Y2L1	Q9Y2L1	Exosome complex exonuclease RRP44	DIS3	IRMSLVEPQIPGISIPTDTSNMDLNGPKKKK	5355	P	3	9449		0.846953	0.00134766	57.432	57.432	57.432	1.303	16667000	NaN	NaN	0.846953	NaN	NaN	57.432
Q9Y2R4	537	Q9Y2R4	Q9Y2R4	Probable ATP-dependent RNA helicase DDX52	DDX52	PLLRSVANVIQQAGCPVPEYIKGFQKLLSKQ	5361	P	3	9461		0.907206	0.000658146	111.94	98.03	84.895	-1.2661	20120000	0.907206	NaN	NaN	111.94	NaN	NaN
Q9Y2R4	56	Q9Y2R4	Q9Y2R4	Probable ATP-dependent RNA helicase DDX52	DDX52	EVLQGLDFFGNKKSVPGVCGASQTHQKPQNG	5362	P	3	9461		1	0.00433741	74.475	65.44	74.475	2.0153	30733000	1	NaN	NaN	74.475	NaN	NaN
Q9Y2T2	225	Q9Y2T2	Q9Y2T2	AP-3 complex subunit mu-1	AP3M1	IKLSGMPDLSLSFMNPRLLDDVSFHPCIRFK	5363	P	2	9466		0.99533	0.00046414	109.6	109.6	109.6	-0.67962	13078000	NaN	NaN	0.99533	NaN	NaN	109.6
Q9Y2X3	284	Q9Y2X3	Q9Y2X3	Nucleolar protein 58	NOP58	TQLYEYLQNRMMAIAPNVTVMVGELVGARLI	5375	P	2	9477		1	0.00226219	65.395	44.166	65.395	1.0117	0	1	NaN	NaN	65.395	NaN	NaN
Q9Y2X9	657	Q9Y2X9	Q9Y2X9	Zinc finger protein 281	ZNF281	SELVQEENLSPGTQTPSNDKASMLQEYSKYL	5379	P	5	9479		0.945133	9.15872e-07	57.832	54.127	57.832	0.84069	44076000	0.945133	NaN	NaN	57.832	NaN	NaN
Q9Y375	218	Q9Y375	Q9Y375	Complex I intermediate-associated protein 30, mitochondrial	NDUFAF1	SQFNTLYLRVRGDGRPWMVNIKEDTDFFQRT	5384	P	4	9502		1	0.00255658	72.359	65.901	72.359	-0.19819	37720000	1	NaN	NaN	72.359	NaN	NaN
Q9Y383	45	Q9Y383	Q9Y383	Putative RNA-binding protein Luc7-like 2	LUC7L2	FSDDRVCKSHLLNCCPHDVLSGTRMDLGECL	5385	P	4	9504		1	0.00306392	52.483	49.495	52.483	-0.2267	139390000	NaN	NaN	1	NaN	NaN	52.483
Q9Y3C0	7	Q9Y3C0	Q9Y3C0	WASH complex subunit CCDC53	CCDC53	_________MDEDGLPLMGSGIDLTKVPAIQ	5388	P	3	9523		0.999997	3.28677e-06	100.79	97.516	100.79	0.18296	91381000	NaN	NaN	0.999997	NaN	NaN	100.79
Q9Y3C0	148	Q9Y3C0	Q9Y3C0	WASH complex subunit CCDC53	CCDC53	DPRYARYLKMVQVGVPVMAIRNKMISEGLDP	5389	P	2	9523		1	0.00350456	104.17	86.731	78.264	-0.2381	110690000	NaN	NaN	1	NaN	NaN	104.17
Q9Y3E7	189	Q9Y3E7	Q9Y3E7	Charged multivesicular body protein 3	CHMP3	AGALGKAPSKVTDALPEPEPPGAMAASEDEE	5394	P	3	9542		1	0.000106363	48.831	47.106	48.831	-2.5398	32855000	1	NaN	NaN	48.831	NaN	NaN
Q9Y3E7	191	Q9Y3E7	Q9Y3E7	Charged multivesicular body protein 3	CHMP3	ALGKAPSKVTDALPEPEPPGAMAASEDEEEE	5395	P	3	9542		1	0.000106363	48.831	47.106	48.831	-2.5398	32855000	1	NaN	NaN	48.831	NaN	NaN
Q9Y3E7	193	Q9Y3E7	Q9Y3E7	Charged multivesicular body protein 3	CHMP3	GKAPSKVTDALPEPEPPGAMAASEDEEEEEE	5396	P	3	9542		1	0.000106363	48.831	47.106	48.831	-2.5398	32855000	1	NaN	NaN	48.831	NaN	NaN
Q9Y3E7	194	Q9Y3E7	Q9Y3E7	Charged multivesicular body protein 3	CHMP3	KAPSKVTDALPEPEPPGAMAASEDEEEEEEA	5397	P	3	9542		1	0.000106363	48.831	47.106	48.831	-2.5398	32855000	1	NaN	NaN	48.831	NaN	NaN
Q9Y3F4	193	Q9Y3F4	Q9Y3F4	Serine-threonine kinase receptor-associated protein	STRAP	KSLNFNMSVSSMEYIPEGEILVITYGRSIAF	5398	P	3	9543		1	0.00639275	49.141	46.879	49.141	0.88654	58934000	1	NaN	NaN	49.141	NaN	NaN
Q9Y426	644	Q9Y426	Q9Y426	C2 domain-containing protein 2	C2CD2	KGAKLFFRRRHQQKDPGMSQSHNDLVFLEQP	5402	P	3	9567		0.999984	0.0209648	48.315	45.124	48.315	2.6299	30358000	NaN	NaN	0.999984	NaN	NaN	48.315
Q9Y490	2163	Q9Y490	Q9Y490	Talin-1	TLN1	ATTEHIRQELAVFCSPEPPAKTSTPEDFIRM	5408	P	4	9580		0.946168	0.0152391	44.258	37.305	44.258	0.55546	12802000	0.946168	NaN	NaN	44.258	NaN	NaN
Q9Y490	1047	Q9Y490	Q9Y490	Talin-1	TLN1	AELRTAAQKAQEACGPLEMDSALSVVQNLEK	5409	P	3	9580		1	0.00341343	54.672	51.79	42.325	0.28378	15665000	1	NaN	1	54.672	NaN	42.325
Q9Y490	470	Q9Y490	Q9Y490	Talin-1	TLN1	SGASGPENFQVGSMPPAQQQITSGQMHRGHM	5411	P	4	9580		0.614397	0.0024237	47.099	36.677	47.099	-0.79193	16322000	NaN	NaN	0.614397	NaN	NaN	47.099
Q9Y490	21	Q9Y490	Q9Y490	Talin-1	TLN1	LKISIGNVVKTMQFEPSTMVYDACRIIRERI	5413	P	2	9580		1	0.00244695	88.187	82.527	88.187	-0.40968	84557000	1	NaN	1	60.49	NaN	88.187
Q9Y4A5	2026	Q9Y4A5	Q9Y4A5	Transformation/transcription domain-associated protein	TRRAP	EVVIKWELQRIKDQQPDSDMDPNSSGEGVNS	5415	P	3	9583		0.895588	0.0030396	55.994	53.452	55.994	0.39373	12719000	NaN	NaN	0.895588	NaN	NaN	55.994
Q9Y4A5	3481	Q9Y4A5	Q9Y4A5	Transformation/transcription domain-associated protein	TRRAP	RFLSNFSAQTAEVEIPGEFLMPKPTHYYIKI	5417	P	4	9583		0.823888	0.000116821	61.89	56.515	61.89	0.25443	224290000	NaN	NaN	0.823888	NaN	NaN	61.89
Q9Y4C2	658	Q9Y4C2	Q9Y4C2	TRPM8 channel-associated factor 1	TCAF1	GETTLEEWKRRIQENPGPWGELATDNIILTV	5422	P	3	9588		0.999973	0.00479917	56.625	45.82	56.625	1.0514	0	0.999973	NaN	NaN	56.625	NaN	NaN
Q9Y4C2	660	Q9Y4C2	Q9Y4C2	TRPM8 channel-associated factor 1	TCAF1	TTLEEWKRRIQENPGPWGELATDNIILTVPT	5423	P	3	9588		0.999973	0.00479917	56.625	45.82	56.625	1.0514	0	0.999973	NaN	NaN	56.625	NaN	NaN
Q9Y4E8	855	Q9Y4E8	Q9Y4E8	Ubiquitin carboxyl-terminal hydrolase 15	USP15	YSRYMRDKLDTLVDFPINDLDMSEFLINPNA	5425	P	3	9597		0.999697	0.000164382	76.21	73.76	76.21	0.32053	1550400	0.999697	NaN	NaN	76.21	NaN	NaN
Q9Y4H2	677	Q9Y4H2	Q9Y4H2	Insulin receptor substrate 2	IRS2	LAGSGSGSCRSDDYMPMSPASVSAPKQILQP	5426	P	2	9605		0.99822	0.00278025	84.718	84.718	84.718	0.29517	27232000	0.99822	NaN	0.981965	84.718	NaN	68.44
Q9Y4J8	240	Q9Y4J8	Q9Y4J8	Dystrobrevin alpha	DTNA	LPLLHRLANVENVFHPVECSYCHSESMMGFR	5433	P	4	9608		1	0.0110184	40.937	30.515	40.937	-0.19958	22801000	1	NaN	NaN	40.937	NaN	NaN
Q9Y4P1	347	Q9Y4P1	Q9Y4P1	Cysteine protease ATG4B	ATG4B	WCQQVKKLSLLGGALPMFELVELQPSHLACP	5436	P	3	9614		0.996529	3.71205e-12	72.857	69.046	72.857	0.06268	0	0.996529	NaN	NaN	72.857	NaN	NaN
Q9Y4P1	356	Q9Y4P1	Q9Y4P1	Cysteine protease ATG4B	ATG4B	LLGGALPMFELVELQPSHLACPDVLNLSLDS	5437	P	3	9614		0.996529	3.71205e-12	72.857	69.046	72.857	0.06268	0	0.996529	NaN	NaN	72.857	NaN	NaN
Q9Y4P8	204	Q9Y4P8	Q9Y4P8	WD repeat domain phosphoinositide-interacting protein 2	WIPI2	TINLRAANMIPAHDSPLAALAFDASGTKLAT	5439	P	3	9616		0.537931	0.00403616	57.61	48.563	57.61	-1.0453	0	0.537931	NaN	NaN	57.61	NaN	NaN
Q9Y570	356	Q9Y570	Q9Y570	Protein phosphatase methylesterase 1	PPME1	MQVLPQCGHAVHEDAPDKVAEAVATFLIRHR	5450	P	5	9637		0.520679	0.0069992	54.683	52.894	54.683	-0.10704	2945000	0.520679	NaN	NaN	54.683	NaN	NaN
Q9Y597	649	Q9Y597	Q9Y597	BTB/POZ domain-containing protein KCTD3	KCTD3	HHDTTHEAATYGSMRPYRESPLLARARRTES	5451	P	5	9644		1	0.00413425	46.66	35.349	46.66	-0.33713	43075000	1	NaN	NaN	46.66	NaN	NaN
Q9Y5A7	211	Q9Y5A7	Q9Y5A7	NEDD8 ultimate buster 1	NUB1	LAKRAAETVVDPEMTPYLDIANQTGRSIRIP	5453	P	2	9646		0.624136	0.0140233	75.589	62.452	75.589	-1.0887	16597000	NaN	0	0.624136	NaN	NaN	75.589
Q9Y5B0	809	Q9Y5B0	Q9Y5B0	RNA polymerase II subunit A C-terminal domain phosphatase	CTDP1	SSLPIRQEPSSFRAVPPPQPQMFGEELPDAQ	5457	P	3	9648		0.70147	0.0313478	45.862	39.567	45.862	-0.80409	0	0.70147	NaN	NaN	45.862	NaN	NaN
Q9Y5J1	261	Q9Y5J1	Q9Y5J1	U3 small nucleolar RNA-associated protein 18 homolog	UTP18	AERPTVARISSVQFHPGAQIVMVAGLDNAVS	5459	P	3	9654		1	0.000332291	89.129	79.986	89.129	0.12166	12679000	NaN	NaN	1	NaN	NaN	89.129
Q9Y5L0	6	Q9Y5L0	Q9Y5L0	Transportin-3	TNPO3	__________MEGAKPTLQLVYQAVQALYHD	5460	P	4	9662		0.999998	5.53422e-05	60.728	49.825	60.728	1.6115	64687000	NaN	NaN	0.999998	NaN	NaN	60.728
Q9Y5S2	1685	Q9Y5S2	Q9Y5S2	Serine/threonine-protein kinase MRCK beta	CDC42BPB	DSDSTKHSTPSNSSNPSGPPSPNSPHRSQLP	5464	P	3	9674		0.999833	0.0172118	44.641	40.746	44.641	-1.8411	17515000	0.999833	NaN	NaN	44.641	NaN	NaN
Q9Y5S2	1688	Q9Y5S2	Q9Y5S2	Serine/threonine-protein kinase MRCK beta	CDC42BPB	STKHSTPSNSSNPSGPPSPNSPHRSQLPLEG	5465	P	3	9674		0.999833	0.0172118	44.641	40.746	44.641	-1.8411	17515000	0.999833	NaN	NaN	44.641	NaN	NaN
Q9Y5S2	1689	Q9Y5S2	Q9Y5S2	Serine/threonine-protein kinase MRCK beta	CDC42BPB	TKHSTPSNSSNPSGPPSPNSPHRSQLPLEGL	5466	P	3	9674		0.999833	0.0172118	44.641	40.746	44.641	-1.8411	17515000	0.999833	NaN	NaN	44.641	NaN	NaN
Q9Y5S2	1691	Q9Y5S2	Q9Y5S2	Serine/threonine-protein kinase MRCK beta	CDC42BPB	HSTPSNSSNPSGPPSPNSPHRSQLPLEGLEQ	5467	P	3	9674		0.999833	0.0172118	44.641	40.746	44.641	-1.8411	17515000	0.999833	NaN	NaN	44.641	NaN	NaN
Q9Y5S2	1694	Q9Y5S2	Q9Y5S2	Serine/threonine-protein kinase MRCK beta	CDC42BPB	PSNSSNPSGPPSPNSPHRSQLPLEGLEQPAC	5468	P	3	9674		0.998538	0.0172118	44.641	40.746	44.641	-1.8411	17515000	0.998538	NaN	NaN	44.641	NaN	NaN
Q9Y5Y2	230	Q9Y5Y2	Q9Y5Y2	Cytosolic Fe-S cluster assembly factor NUBP2	NUBP2	AQLAGVPFLGSVPLDPALMRTLEEGHDFIQE	5472	P	2	9689		0.80267	1.08262e-17	149	137.73	149	-2.7322	91162000	NaN	NaN	0.80267	NaN	NaN	149
Q9Y617	292	Q9Y617	Q9Y617	Phosphoserine aminotransferase	PSAT1	TIYEIIDNSQGFYVCPVEPQNRSKMNIPFRI	5474	P	3	9699		0.995196	0.000623324	68.406	65.363	68.406	-0.44039	163660000	0.995196	NaN	0.926191	68.406	NaN	47.281
Q9Y696	101	Q9Y696	Q9Y696	Chloride intracellular channel protein 4	CLIC4	TDVNKIEEFLEEVLCPPKYLKLSPKHPESNT	5487	P	3	9719		0.82255	0.00284408	89.877	77.323	60.764	0.33299	75958000	0.82255	NaN	NaN	89.877	NaN	NaN
Q9Y697	79	Q9Y697	Q9Y697	Cysteine desulfurase, mitochondrial	NFS1	QATTPLDPRVLDAMLPYLINYYGNPHSRTHA	5488	P	3	9720		0.999995	0.00970259	56.936	49.039	56.936	-0.25272	16230000	0.999995	NaN	NaN	56.936	NaN	NaN
Q9Y6A5	395	Q9Y6A5	Q9Y6A5	Transforming acidic coiled-coil-containing protein 3	TACC3	EVEEDDGRSGAGEDPPMPASRGSYHLDWDKM	5491	P	3	9723		0.680796	0.0106821	61.37	54.866	50.158	-0.74007	123840000	0.453184	0	0.680796	61.37	NaN	50.158
Q9Y6I3	436	Q9Y6I3	Q9Y6I3	Epsin-1	EPN1	AGELELLAGEVPARSPGAFDMSGVRGSLAEA	5495	P	4	9741		0.997835	1.25717e-05	112.13	100.74	46.54	-0.22061	161630000	0.988769	NaN	0.997835	112.13	NaN	101.36
Q9Y6K0	19	Q9Y6K0	Q9Y6K0	Choline/ethanolaminephosphotransferase 1	CEPT1	HRSTRKRCGDSHPESPVGFGHMSTTGCVLNK	5499	P	4	9748		0.973688	0.0230613	40.142	37.529	40.142	-0.70292	11248000	NaN	NaN	0.973688	NaN	NaN	40.142
Q9Y6R4	1496	Q9Y6R4	Q9Y6R4	Mitogen-activated protein kinase kinase kinase 4	MAP3K4	DFGCSVKLKNNAQTMPGEVNSTLGTAAYMAP	5503	P	3	9767		0.953958	0.00602814	45.332	45.332	45.332	-2.2385	5940000	NaN	NaN	0.953958	NaN	NaN	45.332
Q9Y6X4	287	Q9Y6X4	Q9Y6X4	Soluble lamin-associated protein of 75 kDa	FAM169A	EPKRPMSGEYGPASVPEYEARTEDNQSSEMQ	5505	P	4	9774		0.803493	0.00170357	41.476	41.476	41.476	0.84669	13031000	NaN	NaN	0.803493	NaN	NaN	41.476
Q9Y6Y8	436	Q9Y6Y8	Q9Y6Y8	SEC23-interacting protein	SEC23IP	PRVVKRGIDDNLDEIPDGEMPQVDHLVFVVH	5509	P	3	9779		0.87118	4.56687e-06	92.817	82.993	92.817	-0.34096	32065000	0.87118	NaN	0.836303	92.817	NaN	60.181
O00410	909	O00410	O00410	Importin-5	IPO5	HCSPASFKYAEYFLRPMLQYVCDNSPEVRQA	92	P	3	290	+	1	3.67449e-11	136.58	130.07	136.58	-0.31431	324750000	NaN	NaN	1	NaN	NaN	136.58
O00411	808	O00411	O00411	DNA-directed RNA polymerase, mitochondrial	POLRMT	VFWLPHNMDFRGRTYPCPPHFNHLGSDVARA	95	P	4	291	+	0.887353	0.0127612	49.993	46.332	49.993	-0.016202	11099000	0.887353	NaN	NaN	49.993	NaN	NaN
O00443	549	O00443	O00443	Phosphatidylinositol 4-phosphate 3-kinase C2 domain-containing subunit alpha	PIK3C2A	LYQIEKPCKEAMTRHPVEELLDSYHNQVELA	100	P	5	298	+	1	0.00366026	42.121	37.014	42.121	0.52191	36175000	NaN	NaN	1	NaN	NaN	42.121
O43290	29	O43290	O43290	U4/U6.U5 tri-snRNP-associated protein 1	SART1	AGTTAAAGTGGATEQPPRHREHKKHKHRSGG	255	P	5	593	+	0.5	0.00012287	75.646	72.895	75.646	-1.4394	13606000	NaN	NaN	0.5	NaN	NaN	75.646
O43290	30	O43290	O43290	U4/U6.U5 tri-snRNP-associated protein 1	SART1	GTTAAAGTGGATEQPPRHREHKKHKHRSGGS	256	P	5	593	+	0.5	0.00012287	75.646	72.895	75.646	-1.4394	13606000	NaN	NaN	0.5	NaN	NaN	75.646
O43347	290	O43347	O43347	RNA-binding protein Musashi homolog 1	MSI1	AAAAAAAVVRGTGSHPWTMAPPPGSTPSRTG	261	P	3	609	+	0.992705	0.00764192	58.997	49.592	58.997	0.85978	261470000	NaN	NaN	0.992705	NaN	NaN	58.997
O43865	4	O43865	O43865	Putative adenosylhomocysteinase 2	AHCYL1	____________MSMPDAMPLPGVGEELKQA	309	P	3	706	+	0.832453	0.00672673	60.062	60.062	60.062	-0.41015	131190000	0.832453	NaN	NaN	60.062	NaN	NaN
O75431	73	O75431	O75431	Metaxin-2	MTX2	VCRANAEYMSPSGKVPFIHVGNQVVSELGPI	441	P	4	938	+	0.605047	4.91098e-05	87.719	82.91	87.719	0.12575	212350000	0.52518	NaN	0.605047	40.986	NaN	87.719
O75880	90	O75880	O75880	Protein SCO1 homolog, mitochondrial	SCO1	PWSQKGPGDSTRPSKPGPVSWKSLAITFAIG	515	P	3	1022	+	0.995486	0.00992238	89.358	63.768	89.358	-0.34888	76814000	0.995486	NaN	NaN	89.358	NaN	NaN
O75880	92	O75880	O75880	Protein SCO1 homolog, mitochondrial	SCO1	SQKGPGDSTRPSKPGPVSWKSLAITFAIGGA	516	P	3	1022	+	0.995486	0.00992238	89.358	63.768	89.358	-0.34888	76814000	0.995486	NaN	NaN	89.358	NaN	NaN
O95147	82	O95147	O95147	Dual specificity protein phosphatase 14	DUSP14	NWPQFEYVKVPLADMPHAPIGLYFDTVADKI	584	P	5	1155	+	0.482437	0.00123547	52.824	47.044	52.824	0.19311	0	0.482437	NaN	0.461669	52.824	NaN	50.986
O95817	305	O95817	O95817	BAG family molecular chaperone regulator 3	BAG3	PSPIRVHTVVDRPQQPMTHRETAPVSQPENK	666	P	4	1281	+	0.999769	0.000395732	90.367	63.595	90.367	0.17898	222190000	NaN	NaN	0.999769	NaN	NaN	90.367
P00558	318	P00558	P00558	Phosphoglycerate kinase 1	PGK1	VASGIPAGWMGLDCGPESSKKYAEAVTRAKQ	713	P	3	1339	+	1	6.06499e-08	91.355	86.551	42.708	-2.3043	266080000	1	NaN	1	91.355	NaN	44.625
P08708	100	P08708	P08708	40S ribosomal protein S17	RPS17	VPEVSALDQEIIEVDPDTKEMLKLLDFGSLS	948	P	4	1507	+	1	0.000156486	88.122	82.578	88.122	-0.43351	1322900000	1	NaN	NaN	88.122	NaN	NaN
P13667	553	P13667	P13667	Protein disulfide-isomerase A4	PDIA4	IVMDPKKDVLIEFYAPWCGHCKQLEPVYNSL	1140	P	4	1685	+	1	0.023591	55.841	52.2	46.249	-1.1033	88511000	1	NaN	1	55.841	NaN	46.249
P17844	260	P17844	P17844	Probable ATP-dependent RNA helicase DDX5	DDX5	LVLDEADRMLDMGFEPQIRKIVDQIRPDRQT	1269	P	4	1824	+	1	0.000238887	75.112	68.237	75.112	-0.38943	127560000	NaN	NaN	1	NaN	NaN	75.112
P17980	220	P17980	P17980	26S protease regulatory subunit 6A	PSMC3	PMNHKEKFENLGIQPPKGVLMYGPPGTGKTL	1273	P	4	1829	+	0.939128	0.0100259	62.611	55.078	42.106	1.7577	100750000	NaN	NaN	0.939128	NaN	NaN	62.611
P30101	404	P30101	P30101	Protein disulfide-isomerase A3	PDIA3	IVNNENKDVLIEFYAPWCGHCKNLEPKYKEL	1577	P	3	2119	+	1	0.000409725	67.951	62.152	67.951	-1.1721	45494000	1	NaN	1	55.841	NaN	67.951
P30419	340	P30419	P30419	Glycylpeptide N-tetradecanoyltransferase 1	NMT1	KLYRLPETPKTAGLRPMETKDIPVVHQLLTR	1586	P	5	2131	+	0.985937	0.00446714	51.645	48.546	51.645	0.077273	112030000	0.985937	NaN	NaN	51.645	NaN	NaN
P30876	955	P30876	P30876	DNA-directed RNA polymerase II subunit RPB2	POLR2B	GQKGTCGIQYRQEDMPFTCEGITPDIIINPH	1598	P	4	2145	+	0.999957	4.54613e-06	98.258	96.731	98.258	1.0638	199300000	0.999957	NaN	NaN	98.258	NaN	NaN
P35610	63	P35610	P35610	Sterol O-acyltransferase 1	SOAT1	IAKKIKLTAEAEELKPFFMKEVGSHFDDFVT	1680	P	5	2241	+	1	6.24993e-10	134.91	125.53	134.91	-0.978	292010000	1	NaN	1	72.292	NaN	134.91
P46013	1301	P46013	P46013	Antigen KI-67	MKI67	RNLMPSAGKAMHTPKPSVGEEKDIIIFVGTP	1814	P	5	2417	+	0.538333	0.0012571	57.945	50.993	57.945	0.43524	169500000	NaN	NaN	0.538333	NaN	NaN	57.945
P49281	266	P49281	P49281	Natural resistance-associated macrophage protein 2	SLC11A2	PQIEQAVGIVGAVIMPHNMYLHSALVKSRQV	1924	P	4	2503	+	1	0.000399326	69.578	63.497	69.578	-0.70072	187100000	NaN	NaN	1	NaN	NaN	69.578
P51003	306	P51003	P51003	Poly(A) polymerase alpha	PAPOLA	EECNLNLPVWDPRVNPSDRYHLMPIITPAYP	2044	P	4	2608	+	0.898611	1.48672e-05	74.806	65.344	74.806	0.93374	87808000	NaN	NaN	0.898611	NaN	NaN	74.806
P52434	82	P52434	P52434	DNA-directed RNA polymerases I, II, and III subunit RPABC3	POLR2H	DGTLDDGEYNPTDDRPSRADQFEYVMYGKVY	2096	P	4	2679	+	0.984064	1.89041e-07	79.19	75.269	79.19	-0.4108	29190000	NaN	NaN	0.984064	NaN	NaN	79.19
P52564	55	P52564	P52564	Dual specificity mitogen-activated protein kinase kinase 6	MAP2K6	SIGNQNFEVKADDLEPIMELGRGAYGVVEKM	2097	P	3	2681	+	1	0.00587035	65.423	58.99	58.877	0.7927	46516000	1	NaN	1	65.423	NaN	58.877
P52907	64	P52907	P52907	F-actin-capping protein subunit alpha-1	CAPZA1	GAAHAFAQYNMDQFTPVKIEGYEDQVLITEH	2110	P	5	2711	+	1	3.74064e-07	55.772	54.464	55.772	-2.4349	19056000	1	NaN	NaN	55.772	NaN	NaN
P54819	158	P54819	P54819	Adenylate kinase 2, mitochondrial;Adenylate kinase 2, mitochondrial, N-terminally processed	AK2	LIHPKSGRSYHEEFNPPKEPMKDDITGEPLI	2164	P	5	2783	+	0.441523	0.00983993	45.784	39.421	45.011	0.032454	0	0.441523	0	0	45.784	NaN	NaN
P54819	159	P54819	P54819	Adenylate kinase 2, mitochondrial;Adenylate kinase 2, mitochondrial, N-terminally processed	AK2	IHPKSGRSYHEEFNPPKEPMKDDITGEPLIR	2165	P	5	2783	+	0.441523	0.0109513	45.011	42.504	45.011	0.032454	0	0.441523	0	0	45.011	NaN	NaN
P61106	41	P61106	P61106	Ras-related protein Rab-14	RAB14	CLLHQFTEKKFMADCPHTIGVEFGTRIIEVS	2275	P	4	2921	+	1	0.0290812	49.463	45.622	49.463	-0.17925	118230000	NaN	NaN	1	NaN	NaN	49.463
P62195	6	P62195	P62195	26S protease regulatory subunit 8	PSMC5	__________MALDGPEQMELEEGKAGSGLR	2305	P	3	2975	+	1	5.93244e-08	113.63	99.666	80.813	-0.035991	974140000	1	NaN	1	103.76	NaN	113.63
P67870	164	P67870	P67870	Casein kinase II subunit beta	CSNK2B	SRHHHTDGAYFGTGFPHMLFMVHPEYRPKRP	2370	P	6	3068	+	0.982939	0.00332852	42.166	39.942	42.166	0.15442	331430000	NaN	NaN	0.982939	NaN	NaN	42.166
Q01469	41	Q01469	Q01469	Fatty acid-binding protein, epidermal	FABP5	LGVGIALRKMGAMAKPDCIITCDGKNLTIKT	2486	P	3	3218	+	1	0.0357788	54.471	48.626	43.297	-1.9707	397900000	1	NaN	1	54.471	NaN	44.847
Q06830	91	Q06830	Q06830	Peroxiredoxin-1	PRDX1	ASVDSHFCHLAWVNTPKKQGGLGPMNIPLVS	2588	P	4	3347	+	1	0.00203826	52.321	45.816	52.321	-0.0057832	46681000	NaN	NaN	1	NaN	NaN	52.321
Q13017	1082	Q13017	Q13017	Rho GTPase-activating protein 5	ARHGAP5	GKNPRKQTSRVPLAHPEDMDPSDNYAEPIDT	2726	P	3	3495	+	0.754685	0.00677935	50.215	47.839	50.215	3.0087	197000000	0.754685	NaN	NaN	50.215	NaN	NaN
Q13123	61	Q13123	Q13123	Protein Red	IK	APTSAPPSKSRHHEMPREYNEDEDPAARRRK	2754	P	4	3513	+	1	0.00273855	71.742	68.081	71.742	-0.12523	31949000	NaN	NaN	1	NaN	NaN	71.742
Q13541	66	Q13541	Q13541	Eukaryotic translation initiation factor 4E-binding protein 1	EIF4EBP1	RIIYDRKFLMECRNSPVTKTPPRDLPTIPGV	2849	P	4	3618	+	0.999909	1.26634e-08	72.879	68.604	72.879	-0.91641	180760000	0.999909	NaN	NaN	72.879	NaN	NaN
Q13541	71	Q13541	Q13541	Eukaryotic translation initiation factor 4E-binding protein 1	EIF4EBP1	RKFLMECRNSPVTKTPPRDLPTIPGVTSPSS	2850	P	4	3618	+	0.999919	1.26634e-08	72.879	68.604	72.879	-0.91641	180760000	0.999919	0	NaN	72.879	NaN	NaN
Q13541	72	Q13541	Q13541	Eukaryotic translation initiation factor 4E-binding protein 1	EIF4EBP1	KFLMECRNSPVTKTPPRDLPTIPGVTSPSSD	2851	P	4	3618	+	0.999919	1.26634e-08	72.879	68.604	72.879	-0.91641	180760000	0.999919	0	NaN	72.879	NaN	NaN
Q13541	76	Q13541	Q13541	Eukaryotic translation initiation factor 4E-binding protein 1	EIF4EBP1	ECRNSPVTKTPPRDLPTIPGVTSPSSDEPPM	2852	P	4	3618	+	0.999919	1.26634e-08	72.879	68.604	72.879	-0.91641	180760000	0.999919	0	NaN	72.879	NaN	NaN
Q13541	79	Q13541	Q13541	Eukaryotic translation initiation factor 4E-binding protein 1	EIF4EBP1	NSPVTKTPPRDLPTIPGVTSPSSDEPPMEAS	2853	P	4	3618	+	0.99993	1.26634e-08	72.879	68.604	72.879	-0.91641	180760000	0.99993	0	NaN	72.879	NaN	NaN
Q13585	362	Q13585	Q13585	Melatonin-related receptor	GPR50	REQDRAHACPAVEETPMNVRNVPLPGDAAAG	2866	P	3	3634	+	0.999997	0.0125481	61.167	56.699	61.167	-1.1287	36005000	0.999997	NaN	NaN	61.167	NaN	NaN
Q14690	481	Q14690	Q14690	Protein RRP5 homolog	PDCD11	YGMLVKVGEQMRGLVPPMHLADILMKNPEKK	3020	P	3	3808	+	0.999982	0.00687296	50.787	34.845	50.787	-0.48786	31534000	NaN	NaN	0.999982	NaN	NaN	50.787
Q14690	482	Q14690	Q14690	Protein RRP5 homolog	PDCD11	GMLVKVGEQMRGLVPPMHLADILMKNPEKKY	3021	P	3	3808	+	0.999982	0.00687296	50.787	34.845	50.787	-0.48786	31534000	NaN	NaN	0.999982	NaN	NaN	50.787
Q14980	1746	Q14980	Q14980	Nuclear mitotic apparatus protein 1	NUMA1	EGTPLSITSKLPRTQPDGTSVPGEPASPISQ	3075	P	4	3841	+	0.883935	0.000393434	42.661	31.018	42.661	-0.85521	52698000	NaN	NaN	0.883935	NaN	NaN	42.661
Q14980	1752	Q14980	Q14980	Nuclear mitotic apparatus protein 1	NUMA1	ITSKLPRTQPDGTSVPGEPASPISQRLPPKV	3076	P	4	3841	+	0.821543	0.000393434	42.661	31.018	42.661	-0.85521	52698000	NaN	NaN	0.821543	NaN	NaN	42.661
Q14980	1755	Q14980	Q14980	Nuclear mitotic apparatus protein 1	NUMA1	KLPRTQPDGTSVPGEPASPISQRLPPKVESL	3077	P	4	3841	+	0.821543	0.000393434	42.661	31.018	42.661	-0.85521	52698000	NaN	NaN	0.821543	NaN	NaN	42.661
Q14980	1758	Q14980	Q14980	Nuclear mitotic apparatus protein 1	NUMA1	RTQPDGTSVPGEPASPISQRLPPKVESLESL	3078	P	4	3841	+	0.821711	0.000393434	42.661	31.018	42.661	-0.85521	52698000	NaN	NaN	0.821711	NaN	NaN	42.661
Q14980	1764	Q14980	Q14980	Nuclear mitotic apparatus protein 1	NUMA1	TSVPGEPASPISQRLPPKVESLESLYFTPIP	3079	P	4	3841	+	0.821706	0.000393434	42.661	31.018	42.661	-0.85521	52698000	NaN	NaN	0.821706	NaN	NaN	42.661
Q14980	1765	Q14980	Q14980	Nuclear mitotic apparatus protein 1	NUMA1	SVPGEPASPISQRLPPKVESLESLYFTPIPA	3080	P	4	3841	+	0.821706	0.000393434	42.661	31.018	42.661	-0.85521	52698000	NaN	NaN	0.821706	NaN	NaN	42.661
Q15084	404	Q15084	Q15084	Protein disulfide-isomerase A6	PDIA6	SFGRGSTAPVGGGAFPTIVEREPWDGRDGEL	3118	P	3	3899	+	0.999969	0.00298087	62.064	47.755	62.064	-2.1056	98298000	0.999969	NaN	NaN	62.064	NaN	NaN
Q15084	411	Q15084	Q15084	Protein disulfide-isomerase A6	PDIA6	APVGGGAFPTIVEREPWDGRDGELPVEDDID	3119	P	3	3899	+	0.999969	0.00298087	62.064	47.755	62.064	-2.1056	98298000	0.999969	NaN	NaN	62.064	NaN	NaN
Q5KU26	565	Q5KU26	Q5KU26	Collectin-12	COLEC12	QGTVGEPGVPGPRGLPGLPGVPGMPGPKGPP	3393	P	2	4411	+	0.999999	0.00113984	66.595	57.697	66.595	-0.71065	89650000	0.999991	NaN	0.999999	51.162	NaN	66.595
Q5KU26	568	Q5KU26	Q5KU26	Collectin-12	COLEC12	VGEPGVPGPRGLPGLPGVPGMPGPKGPPGPP	3394	P	2	4411	+	0.999755	0.00113984	66.595	57.697	57.348	-1.0244	89650000	0.998799	NaN	0.999755	51.162	NaN	66.595
Q5KU26	571	Q5KU26	Q5KU26	Collectin-12	COLEC12	PGVPGPRGLPGLPGVPGMPGPKGPPGPPGPS	3395	P	2	4411	+	0.989568	0.00113984	66.595	57.697	57.348	-1.0244	89650000	0.956146	NaN	0.989568	51.162	NaN	66.595
Q5KU26	574	Q5KU26	Q5KU26	Collectin-12	COLEC12	PGPRGLPGLPGVPGMPGPKGPPGPPGPSGAV	3396	P	2	4411	+	0.629135	0.00466264	57.348	47.395	51.162	-0.71936	57566000	0.629135	NaN	0.50534	51.162	NaN	57.348
Q5KU26	576	Q5KU26	Q5KU26	Collectin-12	COLEC12	PRGLPGLPGVPGMPGPKGPPGPPGPSGAVVP	3397	P	2	4411	+	0.620151	0.00113984	66.595	57.697	56.548	0.8048	75517000	0.585448	NaN	0.620151	43.297	NaN	66.595
Q5SRI9	263	Q5SRI9	Q5SRI9	Glycoprotein endo-alpha-1,2-mannosidase	MANEA	HPAFYRYKTKTGNALPMFYVYDSYITKPEKW	3406	P	3	4435	+	1	0.00182063	84.762	80.575	84.762	0.30051	327850000	1	NaN	NaN	84.762	NaN	NaN
Q6W2J9	731	Q6W2J9	Q6W2J9	BCL-6 corepressor	BCOR	YQDALGLGMVHPMLIPHTPIEITKEEKPERR	3611	P	5	4931	+	0.513694	2.39958e-05	49.479	42.335	49.479	2.2986	16044000	0.513694	NaN	NaN	49.479	NaN	NaN
Q7L014	645	Q7L014	Q7L014	Probable ATP-dependent RNA helicase DDX46	DDX46	EHADGLLKDLMRASYPCMSLHGGIDQYDRDS	3655	P	4	5062	+	1	0.00820364	47.018	44.189	47.018	-0.15178	171080000	NaN	NaN	1	NaN	NaN	47.018
[truncated: 15 more rows]

## Sheet: RCC4
Proteins	Positions within proteins	Leading proteins	Protein	Protein names	Gene names	Sequence window	id	Amino acid	Charge	Protein group IDs	Diagnostic peak	Localization prob	PEP	Score	Delta score	Score for localization	Mass error [ppm]	Intensity	DMSO Localization prob	FG Localization prob	MG Localization prob	DMSO Score	FG Score	MG Score
[truncated: 1,253 more rows]

[truncated: 1 more sheets: Overlap bwteen HEK293 and RCC4]
